# Supplementary material for: Epimutation profiling in Beckwith-Wiedemann syndrome: relationship with assisted reproductive technology
Source: PubMed Central journal article supplement (PMC3878854; doi:10.1186/1868-7083-5-23), 2013-12-10
Supplement: 1868-7083-5-23-S1.pdf [file 1868-7083-5-23-S1.pdf]

| TargetID        | BWS1<br>(ART) | BWS2   | BWS3<br>(ART) | BWS4   | BWS5<br>(ART) | BWS6<br>(ART) | BWS7<br>(ART) | BWS8   | BWS9<br>(ART) | BWS10  | BWS11  | BWS12<br>(ART) | BWS13<br>(ART) | BWS14<br>(ART) | BWS15<br>(ART) | BWS16  |
|-----------------|---------------|--------|---------------|--------|---------------|---------------|---------------|--------|---------------|--------|--------|----------------|----------------|----------------|----------------|--------|
| AATK_E63_R      | 0.1811        | 0.0348 | 0.9887        | 0.0000 | 0.9897        | 0.0000        | 0.0000        | 0.0097 | 0.9862        | 0.0097 | 0.0000 | 0.0255         | 0.9920         | 0.0000         | 0.9423         | 0.0424 |
| ABCA1_E120_R    | 0.9823        | 0.0000 | 0.9837        | 0.9906 | 0.9901        | 0.9906        | 0.9910        | 0.9908 | 0.9848        | 0.0000 | 0.0000 | 0.9845         | 0.0000         | 0.9876         | 0.9869         | 0.8759 |
| ABCA1_P45_F     | 0.9931        | 0.9922 | 0.9729        | 0.9904 | 0.9828        | 0.9899        | 0.0000        | 0.9862 | 0.9800        | 0.9927 | 0.0000 | 0.9441         | 0.0000         | 0.9867         | 0.9720         | 0.9873 |
| ABCB4_E429_F    | 0.0107        | 0.0043 | 0.0108        | 0.0042 | 0.0061        | 0.0056        | 0.0024        | 0.0058 | 0.0000        | 0.0058 | 0.0066 | 0.0026         | 0.1682         | 0.0000         | 0.0045         | 0.0039 |
| ABCC2_P88_F     | 0.1428        | 0.0447 | 0.0236        | 0.0199 | 0.0327        | 0.0155        | 0.0000        | 0.0494 | 0.0000        | 0.0711 | 0.0000 | 0.0181         | 0.1610         | 0.0000         | 0.0611         | 0.0150 |
| ABCC5_P444_F    | 0.0143        | 0.0142 | 0.0106        | 0.3532 | 0.0048        | 0.0000        | 0.0799        | 0.4560 | 0.0000        | 0.1552 | 0.0975 | 0.0063         | 0.0654         | 0.0000         | 0.0075         | 0.1667 |
| ABCG2_P178_R    | 0.2240        | 0.0671 | 0.8109        | 0.5070 | 0.0836        | 0.0240        | 0.0297        | 0.0470 | 0.0000        | 0.5609 | 0.6465 | 0.4483         | 0.3331         | 0.0000         | 0.0279         | 0.4753 |
| ABCG2_P310_R    | 0.0000        | 0.9924 | 0.9863        | 0.0000 | 0.0000        | 0.0000        | 0.9859        | 0.9769 | 0.9852        | 0.9833 | 0.0000 | 0.9897         | 0.0000         | 0.9599         | 0.9851         | 0.9902 |
| ABL1_P53_F      | 0.3073        | 0.3622 | 0.9904        | 0.9413 | 0.9686        | 0.9912        | 0.2897        | 0.9636 | 0.9852        | 0.2632 | 0.0167 | 0.2758         | 0.2658         | 0.9866         | 0.9729         | 0.4553 |
| ABL2_P459_R     | 0.0000        | 0.0037 | 0.0000        | 0.0000 | 0.0000        | 0.0000        | 0.0000        | 0.0000 | 0.0000        | 0.0072 | 0.0000 | 0.0000         | 0.0000         | 0.0000         | 0.0000         | 0.0000 |
| ABO_E110_F      | 0.0000        | 0.0076 | 0.0117        | 0.0839 | 0.0308        | 0.0300        | 0.0000        | 0.3316 | 0.0000        | 0.2215 | 0.0078 | 0.0055         | 0.0005         | 0.2700         | 0.0110         | 0.0067 |
| ABO_P312_F      | 0.0150        | 0.0418 | 0.3382        | 0.0132 | 0.0116        | 0.0094        | 0.0632        | 0.0152 | 0.0000        | 0.0078 | 0.0132 | 0.0095         | 0.0078         | 0.1370         | 0.1963         | 0.2094 |
| ACTG2_P455_R    | 0.0000        | 0.0000 | 0.0000        | 0.0000 | 0.0000        | 0.0000        | 0.0000        | 0.0000 | 0.0000        | 0.0000 | 0.0000 | 0.0021         | 0.0079         | 0.5614         | 0.0000         | 0.0000 |
| ACVR1_P983_F    | 0.0104        | 0.0026 | 0.7079        | 0.0000 | 0.0034        | 0.0022        | 0.0000        | 0.0038 | 0.0000        | 0.0000 | 0.0000 | 0.0000         | 0.0000         | 0.0000         | 0.0000         | 0.0000 |
| ACVR1B_E497_R   | 0.0187        | 0.0000 | 0.0000        | 0.0000 | 0.0056        | 0.0000        | 0.0127        | 0.0128 | 0.0000        | 0.0000 | 0.3551 | 0.0060         | 0.1170         | 0.0000         | 0.0086         | 0.0788 |
| ACVR1B_P572_R   | 0.0252        | 0.2794 | 0.0209        | 0.0135 | 0.0335        | 0.5084        | 0.0137        | 0.0177 | 0.0000        | 0.3753 | 0.0732 | 0.0231         | 0.3521         | 0.0000         | 0.0092         | 0.0396 |
| ACVR1C_P115_R   | 0.0000        | 0.0060 | 0.0113        | 0.0049 | 0.0000        | 0.0000        | 0.0000        | 0.0070 | 0.0000        | 0.0000 | 0.0000 | 0.0070         | 0.0063         | 0.0000         | 0.0000         | 0.0000 |
| ACVR1C_P363_F   | 0.9849        | 0.0000 | 0.9898        | 0.9913 | 0.9783        | 0.0000        | 0.9909        | 0.0000 | 0.9925        | 0.0000 | 0.0000 | 0.0000         | 0.8786         | 0.9739         | 0.9875         | 0.9907 |
| ACVR2B_E27_R    | 0.4082        | 0.2641 | 0.9885        | 0.9884 | 0.9896        | 0.6510        | 0.9911        | 0.9803 | 0.9862        | 0.3661 | 0.0000 | 0.9914         | 0.3535         | 0.9521         | 0.9821         | 0.9881 |
| ACVR2B_P676_F   | 0.0089        | 0.0000 | 0.0000        | 0.0000 | 0.0000        | 0.0000        | 0.0000        | 0.0000 | 0.0000        | 0.0000 | 0.0000 | 0.0000         | 0.0000         | 0.0000         | 0.0000         | 0.0000 |
| ADAMTS12_P250_R | 0.0000        | 0.0000 | 0.0000        | 0.0025 | 0.0012        | 0.0000        | 0.0000        | 0.0000 | 0.0000        | 0.0000 | 0.0000 | 0.0000         | 0.0000         | 0.0000         | 0.0000         | 0.0000 |
| ADCYAP1_E163_R  | 0.0000        | 0.0000 | 0.0690        | 0.1599 | 0.0111        | 0.0000        | 0.0213        | 0.0097 | 0.0000        | 0.0091 | 0.0000 | 0.0145         | 0.1041         | 0.0000         | 0.0163         | 0.1397 |
| ADCYAP1_P398_F  | 0.9643        | 0.9538 | 0.6793        | 0.944  | 0.9824        | 0.9349        | 0.9845        | 0.9755 | 0.8737        | 0.9662 | 0.9960 | 0.9376         | 0.9861         | 0.9731         | 0.9854         | 0.2041 |
| ADCYAP1_P455_R  | 0.0168        | 0.0106 | 0.4077        | 0.0166 | 0.0631        | 0.0098        | 0.1497        | 0.0173 | 0.0043        | 0.0308 | 0.1996 | 0.0097         | 0.0124         | 0.0192         | 0.0489         | 0.1395 |
| AFF3_P122_F     | 0.0107        | 0.0072 | 0.2309        | 0.0000 | 0.0053        | 0.0040        | 0.0000        | 0.1769 | 0.0000        | 0.0000 | 0.1281 | 0.0058         | 0.0067         | 0.3640         | 0.2654         | 0.0000 |
| AFF3_P808_F     | 0.0272        | 0.0000 | 0.0101        | 0.0000 | 0.0046        | 0.0107        | 0.0054        | 0.0033 | 0.0000        | 0.0116 | 0.2728 | 0.0076         | 0.0000         | 0.3797         | 0.0000         | 0.0000 |
| AFP_P824_F      | 0.3868        | 0.0116 | 0.0174        | 0.0088 | 0.0165        | 0.0139        | 0.0000        | 0.0219 | 0.0000        | 0.1739 | 0.9959 | 0.0125         | 0.0091         | 0.8168         | 0.0208         | 0.9901 |
| AGTR1_P154_F    | 0.0066        | 0.0000 | 0.0000        | 0.0000 | 0.0000        | 0.0000        | 0.0000        | 0.0000 | 0.0000        | 0.0000 | 0.0076 | 0.0000         | 0.0000         | 0.0000         | 0.0000         | 0.0000 |
| AGTR1_P41_F     | 0.0238        | 0.0152 | 0.0270        | 0.4541 | 0.0172        | 0.0131        | 0.4753        | 0.0204 | 0.0000        | 0.0176 | 0.5913 | 0.0267         | 0.0162         | 0.0000         | 0.0196         | 0.2752 |
| AHR_E103_F      | 0.0000        | 0.0000 | 0.9719        | 0.6701 | 0.0000        | 0.0000        | 0.0000        | 0.0000 | 0.9775        | 0.0000 | 0.0000 | 0.9528         | 0.0000         | 0.9531         | 0.9673         | 0.0000 |
| AHR_P166_R      | 0.7606        | 0.7202 | 0.6115        | 0.7807 | 0.8316        | 0.8103        | 0.5473        | 0.8557 | 0.7814        | 0.7532 | 0.6921 | 0.8497         | 0.4251         | 0.7322         | 0.7688         | 0.5833 |

|                |        |        |        |        |        |        |        |        |        |        |        |        |        |        |        |        |
|----------------|--------|--------|--------|--------|--------|--------|--------|--------|--------|--------|--------|--------|--------|--------|--------|--------|
| AIM2_E208_F    | 0.1439 | 0.0739 | 0.0595 | 0.2434 | 0.0147 | 0.0122 | 0.1023 | 0.0224 | 0.0000 | 0.3346 | 0.5640 | 0.0062 | 0.4824 | 0.0000 | 0.0079 | 0.0058 |
| AKT1_P310_R    | 0.0000 | 0.0000 | 0.0094 | 0.0000 | 0.0074 | 0.0000 | 0.0085 | 0.7163 | 0.5592 | 0.0078 | 0.0000 | 0.0147 | 0.0000 | 0.0000 | 0.1590 | 0.0053 |
| ALK_P28_F      | 0.0176 | 0.0000 | 0.0164 | 0.0074 | 0.8965 | 0.4788 | 0.0052 | 0.2127 | 0.0000 | 0.0067 | 0.0112 | 0.0045 | 0.0031 | 0.2915 | 0.0074 | 0.1134 |
| ALOX12_E85_R   | 0.0102 | 0.0000 | 0.0050 | 0.0021 | 0.0000 | 0.0000 | 0.0016 | 0.0025 | 0.0000 | 0.0030 | 0.0038 | 0.0000 | 0.0000 | 0.0000 | 0.0005 | 0.0002 |
| ALOX12_P223_R  | 0.0000 | 0.0592 | 0.8378 | 0.9889 | 0.9874 | 0.4672 | 0.0011 | 0.9781 | 0.0000 | 0.0000 | 0.0000 | 0.0000 | 0.9915 | 0.9070 | 0.9729 | 0.0000 |
| APBA1_E99_R    | 0.0000 | 0.0000 | 0.0000 | 0.0000 | 0.0000 | 0.0000 | 0.0000 | 0.9701 | 0.0000 | 0.0000 | 0.0000 | 0.0000 | 0.0021 | 0.6984 | 0.0000 | 0.0000 |
| APBA1_P644_F   | 0.0000 | 0.0000 | 0.0000 | 0.0000 | 0.0000 | 0.0000 | 0.0000 | 0.0000 | 0.0000 | 0.0000 | 0.0000 | 0.0000 | 0.0000 | 0.0000 | 0.0000 | 0.0000 |
| APBA2_P227_F   | 0.0000 | 0.0068 | 0.0000 | 0.0000 | 0.0144 | 0.0046 | 0.0000 | 0.0071 | 0.0000 | 0.0302 | 0.0000 | 0.0000 | 0.0085 | 0.0000 | 0.0000 | 0.0023 |
| APC_P280_R     | 0.0170 | 0.0000 | 0.1593 | 0.0000 | 0.0000 | 0.0000 | 0.0000 | 0.0000 | 0.9865 | 0.9954 | 0.9945 | 0.0000 | 0.0000 | 0.0000 | 0.1766 | 0.0000 |
| APOA1_P75_F    | 0.2739 | 0.0180 | 0.0286 | 0.0000 | 0.0258 | 0.0000 | 0.0032 | 0.0000 | 0.0000 | 0.0227 | 0.1235 | 0.0000 | 0.0441 | 0.9310 | 0.0183 | 0.0000 |
| APOC1_P406_R   | 0.0142 | 0.0154 | 0.4390 | 0.0071 | 0.6099 | 0.0074 | 0.0063 | 0.6132 | 0.7165 | 0.0070 | 0.0095 | 0.0083 | 0.0764 | 0.5716 | 0.2020 | 0.0063 |
| APP_E8_F       | 0.0000 | 0.0000 | 0.0000 | 0.0000 | 0.0000 | 0.0328 | 0.0095 | 0.0029 | 0.0000 | 0.0473 | 0.0000 | 0.0043 | 0.0000 | 0.0000 | 0.0000 | 0.0025 |
| APP_P179_R     | 0.2609 | 0.2063 | 0.0303 | 0.0164 | 0.0244 | 0.4810 | 0.0234 | 0.5510 | 0.0000 | 0.0559 | 0.4664 | 0.0488 | 0.0297 | 0.0000 | 0.1157 | 0.3956 |
| AR_P189_R      | 0.0344 | 0.0150 | 0.2889 | 0.0141 | 0.2585 | 0.2198 | 0.0000 | 0.0091 | 0.0000 | 0.0660 | 0.2240 | 0.1924 | 0.1524 | 0.0000 | 0.0119 | 0.0054 |
| AREG_E25_F     | 0.0091 | 0.0000 | 0.0070 | 0.0000 | 0.0025 | 0.0008 | 0.0000 | 0.0111 | 0.0000 | 0.0068 | 0.0000 | 0.0000 | 0.0043 | 0.0000 | 0.0028 | 0.0027 |
| ARHGDI1_P148_R | 0.0152 | 0.0163 | 0.0282 | 0.2615 | 0.0295 | 0.0120 | 0.1666 | 0.3224 | 0.4583 | 0.0135 | 0.1287 | 0.0189 | 0.2111 | 0.4199 | 0.0271 | 0.0173 |
| ARNT_P238_R    | 0.0126 | 0.4825 | 0.0140 | 0.0093 | 0.0000 | 0.0064 | 0.0833 | 0.0124 | 0.0000 | 0.0000 | 0.0000 | 0.0054 | 0.0066 | 0.0000 | 0.0037 | 0.2379 |
| ASB4_P391_F    | 0.0110 | 0.0033 | 0.0000 | 0.0056 | 0.0000 | 0.0668 | 0.2624 | 0.0094 | 0.0000 | 0.0052 | 0.0000 | 0.0040 | 0.0000 | 0.9491 | 0.0000 | 0.0124 |
| ASB4_P52_R     | 0.0000 | 0.0084 | 0.0000 | 0.0052 | 0.0095 | 0.0000 | 0.0049 | 0.0070 | 0.0000 | 0.0000 | 0.0119 | 0.0000 | 0.0000 | 0.0000 | 0.0114 | 0.0062 |
| ASCL1_E24_F    | 0.0156 | 0.0001 | 0.0000 | 0.0000 | 0.0000 | 0.0000 | 0.0000 | 0.0000 | 0.0000 | 0.0000 | 0.0000 | 0.0042 | 0.0000 | 0.0000 | 0.0000 | 0.0000 |
| ASCL1_P747_F   | 0.0000 | 0.0048 | 0.0086 | 0.0046 | 0.0071 | 0.1023 | 0.0038 | 0.0035 | 0.0000 | 0.1434 | 0.0710 | 0.0065 | 0.0733 | 0.0000 | 0.0021 | 0.0259 |
| ASCL2_E76_R    | 0.0021 | 0.0000 | 0.0000 | 0.0000 | 0.0000 | 0.0000 | 0.0000 | 0.0000 | 0.0000 | 0.0000 | 0.0000 | 0.0000 | 0.0000 | 0.0000 | 0.0000 | 0.0000 |
| ASCL2_P360_F   | 0.0000 | 0.0000 | 0.0078 | 0.0022 | 0.0000 | 0.0000 | 0.0000 | 0.0033 | 0.0000 | 0.0000 | 0.0101 | 0.0000 | 0.0035 | 0.0000 | 0.0000 | 0.0014 |
| ASCL2_P609_R   | 0.0437 | 0.0035 | 0.0000 | 0.0000 | 0.0000 | 0.0099 | 0.0000 | 0.0000 | 0.0000 | 0.0000 | 0.0000 | 0.0000 | 0.0044 | 0.0000 | 0.0000 | 0.0000 |
| ATP10A_P147_F  | 0.0509 | 0.0069 | 0.0273 | 0.0027 | 0.0000 | 0.0706 | 0.0000 | 0.0082 | 0.0000 | 0.0833 | 0.0731 | 0.0016 | 0.0077 | 0.0000 | 0.0000 | 0.0042 |
| ATP10A_P524_R  | 0.0000 | 0.0151 | 0.0000 | 0.0000 | 0.0000 | 0.0144 | 0.0095 | 0.0173 | 0.0000 | 0.0000 | 0.0000 | 0.0156 | 0.0000 | 0.0000 | 0.0054 | 0.0000 |
| AXIN1_P995_R   | 0.0376 | 0.0291 | 0.0278 | 0.0163 | 0.0378 | 0.0339 | 0.0213 | 0.0206 | 0.0000 | 0.5566 | 0.4248 | 0.0306 | 0.4682 | 0.0000 | 0.0140 | 0.0132 |
| AXL_E61_F      | 0.0108 | 0.0072 | 0.0084 | 0.0000 | 0.0000 | 0.0033 | 0.0031 | 0.3723 | 0.0000 | 0.0035 | 0.0000 | 0.0040 | 0.0000 | 0.0000 | 0.0000 | 0.0013 |
| BAX_E281_R     | 0.0324 | 0.6469 | 0.0202 | 0.4877 | 0.0279 | 0.0139 | 0.6820 | 0.0208 | 0.0000 | 0.6299 | 0.6624 | 0.0121 | 0.5242 | 0.0000 | 0.0119 | 0.4340 |
| BCAM_E100_R    | 0.0101 | 0.0144 | 0.7218 | 0.0092 | 0.0105 | 0.0052 | 0.0067 | 0.0123 | 0.0000 | 0.0721 | 0.1381 | 0.1121 | 0.0078 | 0.0012 | 0.6393 | 0.0129 |
| BCAM_P205_F    | 0.0000 | 0.3501 | 0.0166 | 0.0069 | 0.4883 | 0.0228 | 0.0174 | 0.0233 | 0.0000 | 0.0000 | 0.0000 | 0.0139 | 0.0269 | 0.0000 | 0.0261 | 0.0170 |
| BCAP31_P1131_F | 0.0390 | 0.0253 | 0.0282 | 0.0206 | 0.0366 | 0.0189 | 0.0192 | 0.0222 | 0.0000 | 0.8137 | 0.8147 | 0.0259 | 0.7325 | 0.0072 | 0.0192 | 0.0157 |
| BCL2L2_E172_F  | 0.0000 | 0.0048 | 0.0045 | 0.0008 | 0.0022 | 0.0000 | 0.0028 | 0.0013 | 0.0000 | 0.0044 | 0.0000 | 0.0000 | 0.0015 | 0.0000 | 0.0000 | 0.0000 |

|                 |        |        |        |        |        |        |        |        |        |        |        |        |        |        |        |        |
|-----------------|--------|--------|--------|--------|--------|--------|--------|--------|--------|--------|--------|--------|--------|--------|--------|--------|
| BCL2L2_P280_F   | 0.0116 | 0.0000 | 0.0144 | 0.0056 | 0.0000 | 0.0036 | 0.0000 | 0.0000 | 0.0000 | 0.0000 | 0.0000 | 0.0000 | 0.0029 | 0.0000 | 0.0008 | 0.0000 |
| BCL3_E71_F      | 0.0059 | 0.0040 | 0.0089 | 0.0045 | 0.0058 | 0.0031 | 0.0035 | 0.0043 | 0.0000 | 0.0000 | 0.0000 | 0.0029 | 0.0031 | 0.0000 | 0.0004 | 0.0033 |
| BCL3_P1038_R    | 0.0177 | 0.0165 | 0.0219 | 0.0104 | 0.0082 | 0.0082 | 0.0075 | 0.0122 | 0.0000 | 0.0114 | 0.3326 | 0.0096 | 0.0000 | 0.0000 | 0.0072 | 0.0187 |
| BCL6_P248_R     | 0.0000 | 0.0000 | 0.0044 | 0.0000 | 0.0000 | 0.0000 | 0.0000 | 0.0014 | 0.0000 | 0.0000 | 0.0000 | 0.0000 | 0.0034 | 0.0000 | 0.0000 | 0.0000 |
| BDNF_E19_R      | 0.0113 | 0.0178 | 0.0063 | 0.0033 | 0.0843 | 0.0033 | 0.0087 | 0.0487 | 0.0281 | 0.3865 | 0.0099 | 0.0049 | 0.0096 | 0.0853 | 0.0799 | 0.0037 |
| BDNF_P259_R     | 0.6262 | 0.9934 | 0.9214 | 0.9887 | 0.9901 | 0.9584 | 0.8409 | 0.9472 | 0.9896 | 0.0371 | 0.6478 | 0.9898 | 0.9932 | 0.9754 | 0.9874 | 0.9933 |
| BGN_E282_R      | 0.0102 | 0.0000 | 0.0111 | 0.0032 | 0.0000 | 0.0000 | 0.0000 | 0.3336 | 0.0000 | 0.0078 | 0.0000 | 0.0071 | 0.0000 | 0.0000 | 0.0000 | 0.0000 |
| BGN_P333_R      | 0.0068 | 0.0419 | 0.5371 | 0.0048 | 0.0189 | 0.0000 | 0.0030 | 0.3582 | 0.0000 | 0.2786 | 0.0000 | 0.0041 | 0.1042 | 0.0956 | 0.0138 | 0.0000 |
| BIRC4_P122_R    | 0.0256 | 0.2068 | 0.0323 | 0.0091 | 0.0136 | 0.0146 | 0.0132 | 0.3346 | 0.5321 | 0.2405 | 0.0339 | 0.0221 | 0.0098 | 0.0000 | 0.0087 | 0.0092 |
| BIRC5_E89_F     | 0.0679 | 0.0163 | 0.0203 | 0.0134 | 0.0247 | 0.0672 | 0.0741 | 0.0177 | 0.0000 | 0.0107 | 0.1136 | 0.0125 | 0.0888 | 0.0072 | 0.0298 | 0.0752 |
| BLK_P14_F       | 0.0741 | 0.2506 | 0.0135 | 0.0153 | 0.0083 | 0.3506 | 0.0156 | 0.0111 | 0.0000 | 0.2279 | 0.0646 | 0.0062 | 0.0046 | 0.0000 | 0.0126 | 0.0059 |
| BMP2_E48_R      | 0.0351 | 0.2518 | 0.0219 | 0.0117 | 0.0481 | 0.0106 | 0.0082 | 0.0114 | 0.0000 | 0.4373 | 0.0189 | 0.3831 | 0.0124 | 0.0000 | 0.0115 | 0.1212 |
| BMP2_P1201_F    | 0.0040 | 0.0000 | 0.0000 | 0.0000 | 0.0000 | 0.0000 | 0.0000 | 0.0014 | 0.0000 | 0.0000 | 0.0049 | 0.0000 | 0.0019 | 0.0000 | 0.0000 | 0.0000 |
| BMP3_E147_F     | 0.0000 | 0.0000 | 0.0000 | 0.0000 | 0.0000 | 0.0000 | 0.0000 | 0.0000 | 0.0000 | 0.0000 | 0.0000 | 0.0000 | 0.0000 | 0.0000 | 0.0000 | 0.0000 |
| BMP3_P56_R      | 0.0000 | 0.6939 | 0.0088 | 0.0000 | 0.0002 | 0.0000 | 0.0052 | 0.0093 | 0.0000 | 0.0000 | 0.0000 | 0.0069 | 0.0047 | 0.0000 | 0.0000 | 0.0000 |
| BMP4_P199_R     | 0.0642 | 0.1037 | 0.0212 | 0.0179 | 0.1033 | 0.0939 | 0.0823 | 0.0178 | 0.0000 | 0.0103 | 0.0100 | 0.0897 | 0.0144 | 0.1051 | 0.4286 | 0.0847 |
| BMP6_P398_F     | 0.0000 | 0.9941 | 0.9902 | 0.9649 | 0.9841 | 0.9930 | 0.7727 | 0.9882 | 0.9899 | 0.0058 | 0.0000 | 0.9911 | 0.0000 | 0.9847 | 0.9878 | 0.9907 |
| BMPR1A_P956_F   | 0.0226 | 0.0222 | 0.4681 | 0.0950 | 0.0219 | 0.0175 | 0.0074 | 0.3616 | 0.0000 | 0.0075 | 0.0734 | 0.2501 | 0.1850 | 0.0000 | 0.0237 | 0.0150 |
| BMPR2_E435_F    | 0.0000 | 0.0000 | 0.0000 | 0.0000 | 0.0000 | 0.0000 | 0.0000 | 0.0000 | 0.0000 | 0.0000 | 0.0038 | 0.0000 | 0.0000 | 0.0000 | 0.0000 | 0.0000 |
| BMPR2_P1271_F   | 0.0665 | 0.0231 | 0.0066 | 0.7972 | 0.0311 | 0.0221 | 0.4664 | 0.0073 | 0.0000 | 0.0300 | 0.0057 | 0.0174 | 0.0000 | 0.0000 | 0.0234 | 0.3932 |
| BSG_P211_R      | 0.2644 | 0.1106 | 0.4356 | 0.5057 | 0.1435 | 0.4805 | 0.4757 | 0.0731 | 0.0337 | 0.4592 | 0.4200 | 0.0851 | 0.4910 | 0.1476 | 0.0974 | 0.3631 |
| BTK_P105_F      | 0.1093 | 0.0117 | 0.0166 | 0.1247 | 0.0130 | 0.0050 | 0.0496 | 0.6625 | 0.0000 | 0.0066 | 0.1496 | 0.0106 | 0.1196 | 0.0000 | 0.0273 | 0.1632 |
| C20orf47_P225_R | 0.0186 | 0.0067 | 0.0216 | 0.0000 | 0.6000 | 0.0000 | 0.0053 | 0.0000 | 0.0000 | 0.0087 | 0.0000 | 0.0000 | 0.0000 | 0.0000 | 0.0000 | 0.0608 |
| CALCA_E174_R    | 0.6482 | 0.1281 | 0.2200 | 0.1090 | 0.2942 | 0.1132 | 0.0771 | 0.1533 | 0.0290 | 0.6111 | 0.6201 | 0.1274 | 0.0872 | 0.0563 | 0.1079 | 0.5643 |
| CAPG_E228_F     | 0.0000 | 0.6688 | 0.0116 | 0.0000 | 0.0000 | 0.0006 | 0.0029 | 0.0011 | 0.0000 | 0.0000 | 0.0000 | 0.6857 | 0.0000 | 0.0000 | 0.0000 | 0.0028 |
| CASP10_E139_F   | 0.0000 | 0.0118 | 0.0102 | 0.0068 | 0.0190 | 0.0056 | 0.0000 | 0.0061 | 0.0000 | 0.0138 | 0.0096 | 0.0078 | 0.1038 | 0.0000 | 0.0084 | 0.0000 |
| CASP10_P186_F   | 0.0000 | 0.7439 | 0.0044 | 0.9423 | 0.9026 | 0.9888 | 0.9896 | 0.9764 | 0.0000 | 0.0000 | 0.0000 | 0.9861 | 0.9935 | 0.9699 | 0.5542 | 0.9822 |
| CASP2_P192_F    | 0.0393 | 0.0396 | 0.1274 | 0.4532 | 0.1065 | 0.3662 | 0.3147 | 0.0312 | 0.0016 | 0.2379 | 0.3623 | 0.3752 | 0.0422 | 0.0158 | 0.1664 | 0.3270 |
| CASP3_P420_R    | 0.0000 | 0.0080 | 0.0092 | 0.0019 | 0.0042 | 0.0000 | 0.0000 | 0.0095 | 0.0000 | 0.0000 | 0.0150 | 0.0000 | 0.0000 | 0.0000 | 0.0000 | 0.0023 |
| CASP6_P201_F    | 0.0000 | 0.0027 | 0.9751 | 0.0180 | 0.9765 | 0.0680 | 0.0025 | 0.8351 | 0.9837 | 0.2358 | 0.0000 | 0.0000 | 0.0000 | 0.6260 | 0.7849 | 0.0075 |
| CASP6_P230_R    | 0.0212 | 0.1685 | 0.9859 | 0.0258 | 0.0083 | 0.9923 | 0.0000 | 0.6275 | 0.0000 | 0.0125 | 0.0259 | 0.0058 | 0.0456 | 0.3198 | 0.0787 | 0.0036 |
| CAV1_P130_R     | 0.2472 | 0.3923 | 0.2382 | 0.0000 | 0.0000 | 0.0098 | 0.0744 | 0.0000 | 0.0000 | 0.3356 | 0.0153 | 0.9905 | 0.2618 | 0.7382 | 0.0000 | 0.1852 |
| CAV1_P169_F     | 0.1533 | 0.1705 | 0.0261 | 0.0170 | 0.0291 | 0.1954 | 0.1229 | 0.1697 | 0.0000 | 0.1646 | 0.1749 | 0.1577 | 0.0155 | 0.0061 | 0.0255 | 0.1175 |

|              |        |        |        |        |        |        |        |        |        |        |        |        |        |        |        |        |
|--------------|--------|--------|--------|--------|--------|--------|--------|--------|--------|--------|--------|--------|--------|--------|--------|--------|
| CAV2_E33_R   | 0.1703 | 0.4041 | 0.0685 | 0.0151 | 0.0191 | 0.0108 | 0.0126 | 0.1863 | 0.0000 | 0.0751 | 0.0218 | 0.0860 | 0.0088 | 0.3419 | 0.2382 | 0.6703 |
| CCKBR_P361_R | 0.1783 | 0.0108 | 0.0174 | 0.0143 | 0.0185 | 0.4653 | 0.0109 | 0.0172 | 0.0000 | 0.0411 | 0.1157 | 0.0155 | 0.0134 | 0.0000 | 0.0100 | 0.0081 |
| CCKBR_P480_F | 0.1503 | 0.0000 | 0.0060 | 0.0000 | 0.0000 | 0.0051 | 0.0041 | 0.0000 | 0.0000 | 0.0000 | 0.0109 | 0.0000 | 0.0029 | 0.0000 | 0.0000 | 0.0034 |
| CCNA1_E7_F   | 0.9923 | 0.9875 | 0.9810 | 0.9864 | 0.9848 | 0.0801 | 0.9881 | 0.8071 | 0.9705 | 0.0000 | 0.9947 | 0.3369 | 0.0000 | 0.9061 | 0.9788 | 0.9814 |
| CCNA1_P216_F | 0.0000 | 0.0110 | 0.0000 | 0.0000 | 0.0000 | 0.0000 | 0.0016 | 0.0000 | 0.0000 | 0.0055 | 0.0000 | 0.0000 | 0.0000 | 0.0000 | 0.0000 | 0.0027 |
| CCNC_P132_R  | 0.0000 | 0.0071 | 0.0000 | 0.0053 | 0.0000 | 0.0000 | 0.0000 | 0.0064 | 0.0000 | 0.0000 | 0.0000 | 0.0000 | 0.0000 | 0.0000 | 0.0000 | 0.0069 |
| CCND1_E280_R | 0.9920 | 0.0000 | 0.0000 | 0.0000 | 0.6959 | 0.0025 | 0.7823 | 0.8550 | 0.0000 | 0.0080 | 0.0143 | 0.0031 | 0.0000 | 0.5139 | 0.3376 | 0.0000 |
| CCND1_P343_R | 0.0000 | 0.0000 | 0.0000 | 0.0000 | 0.0000 | 0.0000 | 0.0026 | 0.0000 | 0.0000 | 0.0050 | 0.0000 | 0.0000 | 0.0000 | 0.0000 | 0.0000 | 0.0000 |
| CCND2_P887_F | 0.0000 | 0.0000 | 0.0000 | 0.0000 | 0.0000 | 0.0000 | 0.0000 | 0.0037 | 0.0000 | 0.0000 | 0.0000 | 0.0000 | 0.0010 | 0.0000 | 0.0000 | 0.0000 |
| CCND2_P898_R | 0.1158 | 0.5945 | 0.0726 | 0.1085 | 0.9916 | 0.7743 | 0.0234 | 0.0371 | 0.8022 | 0.9927 | 0.0676 | 0.5358 | 0.9923 | 0.9456 | 0.9009 | 0.9899 |
| CCNE1_P683_F | 0.0000 | 0.0000 | 0.0000 | 0.0000 | 0.0000 | 0.0000 | 0.0000 | 0.0000 | 0.0000 | 0.0000 | 0.0000 | 0.0000 | 0.0000 | 0.0800 | 0.0000 | 0.0000 |
| CD1A_P414_R  | 0.0000 | 0.0106 | 0.0142 | 0.0046 | 0.0083 | 0.0000 | 0.0000 | 0.0164 | 0.0000 | 0.0081 | 0.0000 | 0.0048 | 0.1162 | 0.0000 | 0.0083 | 0.0532 |
| CD2_P68_F    | 0.1185 | 0.7621 | 0.9194 | 0.0033 | 0.6185 | 0.0054 | 0.4803 | 0.5662 | 0.7699 | 0.8067 | 0.0142 | 0.0092 | 0.0000 | 0.3026 | 0.4013 | 0.5405 |
| CD34_P339_R  | 0.0174 | 0.1973 | 0.0250 | 0.0138 | 0.0241 | 0.2811 | 0.1633 | 0.0226 | 0.0000 | 0.2300 | 0.2340 | 0.0177 | 0.0109 | 0.0031 | 0.0199 | 0.2146 |
| CD34_P780_R  | 0.0257 | 0.0238 | 0.6233 | 0.8524 | 0.7601 | 0.8605 | 0.9864 | 0.8638 | 0.8400 | 0.2136 | 0.3367 | 0.9634 | 0.6620 | 0.8945 | 0.6529 | 0.6615 |
| CD40_E58_R   | 0.3865 | 0.0041 | 0.0050 | 0.0000 | 0.0000 | 0.0046 | 0.0000 | 0.0058 | 0.0000 | 0.0000 | 0.0000 | 0.0029 | 0.2132 | 0.0000 | 0.0000 | 0.0024 |
| CD40_P372_R  | 0.0270 | 0.2185 | 0.0291 | 0.2264 | 0.0472 | 0.0196 | 0.0160 | 0.0235 | 0.0000 | 0.1592 | 0.0155 | 0.0211 | 0.0209 | 0.0136 | 0.0387 | 0.0161 |
| CD44_E26_F   | 0.0000 | 0.0155 | 0.0141 | 0.0000 | 0.0000 | 0.0000 | 0.0000 | 0.2421 | 0.0000 | 0.0000 | 0.0000 | 0.0059 | 0.0000 | 0.0000 | 0.0000 | 0.0037 |
| CD44_P87_F   | 0.0127 | 0.0000 | 0.0036 | 0.0000 | 0.8756 | 0.0023 | 0.9927 | 0.8542 | 0.0000 | 0.0000 | 0.0000 | 0.0000 | 0.0000 | 0.7365 | 0.9827 | 0.5888 |
| CD86_P3_F    | 0.0000 | 0.0000 | 0.0000 | 0.0000 | 0.0000 | 0.0000 | 0.0000 | 0.0000 | 0.0000 | 0.0000 | 0.0000 | 0.0000 | 0.0000 | 0.0000 | 0.0000 | 0.0037 |
| CDC25B_E83_F | 0.0000 | 0.0000 | 0.0046 | 0.0000 | 0.0000 | 0.0013 | 0.0000 | 0.0000 | 0.0000 | 0.0081 | 0.0000 | 0.0000 | 0.0013 | 0.0000 | 0.0000 | 0.0000 |
| CDC25B_P11_R | 0.0000 | 0.3371 | 0.0160 | 0.0308 | 0.0000 | 0.0000 | 0.0000 | 0.1509 | 0.0000 | 0.0000 | 0.0000 | 0.0059 | 0.0000 | 0.0000 | 0.0018 | 0.0062 |
| CDH1_P52_R   | 0.0000 | 0.0000 | 0.0000 | 0.0000 | 0.0000 | 0.0020 | 0.0000 | 0.0018 | 0.0000 | 0.0046 | 0.0000 | 0.0024 | 0.0000 | 0.0000 | 0.0000 | 0.0004 |
| CDH11_E102_R | 0.0000 | 0.0000 | 0.0181 | 0.0036 | 0.0013 | 0.0073 | 0.0057 | 0.0057 | 0.0000 | 0.0000 | 0.0000 | 0.0472 | 0.0056 | 0.0000 | 0.0000 | 0.0000 |
| CDH11_P203_R | 0.6092 | 0.5932 | 0.0282 | 0.0169 | 0.7305 | 0.4918 | 0.0131 | 0.0196 | 0.0000 | 0.4417 | 0.0208 | 0.0211 | 0.0105 | 0.0000 | 0.5773 | 0.0102 |
| CDH11_P354_R | 0.0000 | 0.0065 | 0.0101 | 0.0000 | 0.0000 | 0.0000 | 0.0038 | 0.0057 | 0.0000 | 0.9951 | 0.0162 | 0.0000 | 0.0032 | 0.0000 | 0.0057 | 0.0000 |
| CDH13_E102_F | 0.9931 | 0.9942 | 0.6732 | 0.9898 | 0.9817 | 0.9929 | 0.9908 | 0.9889 | 0.0000 | 0.8384 | 0.9971 | 0.9926 | 0.9935 | 0.9887 | 0.9839 | 0.0000 |
| CDH17_E31_F  | 0.0000 | 0.0057 | 0.0581 | 0.1848 | 0.0000 | 0.0099 | 0.1158 | 0.0163 | 0.0000 | 0.1277 | 0.3299 | 0.3658 | 0.2977 | 0.0000 | 0.0118 | 0.0397 |
| CDH17_P532_F | 0.6494 | 0.6235 | 0.9300 | 0.9911 | 0.9873 | 0.9913 | 0.4390 | 0.9010 | 0.9875 | 0.5806 | 0.5721 | 0.8969 | 0.9923 | 0.9421 | 0.9762 | 0.9891 |
| CDH3_E100_R  | 0.0177 | 0.1856 | 0.0295 | 0.0211 | 0.0305 | 0.0108 | 0.1372 | 0.0335 | 0.0000 | 0.1192 | 0.2458 | 0.0218 | 0.1586 | 0.5361 | 0.0389 | 0.1918 |
| CDH3_P87_R   | 0.0000 | 0.0060 | 0.0104 | 0.0005 | 0.0014 | 0.0023 | 0.0020 | 0.0056 | 0.0000 | 0.0072 | 0.0000 | 0.0039 | 0.0000 | 0.0000 | 0.0000 | 0.0039 |
| CDK10_E74_F  | 0.0432 | 0.9933 | 0.7937 | 0.6913 | 0.0897 | 0.5298 | 0.2888 | 0.5129 | 0.0000 | 0.4460 | 0.0247 | 0.0237 | 0.4548 | 0.0156 | 0.7651 | 0.4373 |
| CDK2_P330_R  | 0.0000 | 0.0000 | 0.9184 | 0.0000 | 0.7893 | 0.9918 | 0.0000 | 0.5373 | 0.9884 | 0.2043 | 0.2005 | 0.9008 | 0.0027 | 0.7877 | 0.9822 | 0.0000 |

|                   |        |        |        |        |        |        |        |        |        |        |        |        |        |        |        |        |
|-------------------|--------|--------|--------|--------|--------|--------|--------|--------|--------|--------|--------|--------|--------|--------|--------|--------|
| CDK6_E256_F       | 0.0000 | 0.0101 | 0.0156 | 0.0052 | 0.0027 | 0.0000 | 0.0000 | 0.4685 | 0.0000 | 0.0000 | 0.0091 | 0.6816 | 0.0078 | 0.0000 | 0.0057 | 0.0000 |
| CDK6_P291_R       | 0.1911 | 0.2317 | 0.3951 | 0.0155 | 0.0250 | 0.3458 | 0.2696 | 0.3466 | 0.0000 | 0.3459 | 0.2083 | 0.0101 | 0.0128 | 0.0067 | 0.0779 | 0.0422 |
| CDKN1A_E101_F     | 0.1366 | 0.0345 | 0.0011 | 0.0000 | 0.0000 | 0.0000 | 0.0000 | 0.0091 | 0.0000 | 0.0000 | 0.0073 | 0.0077 | 0.0000 | 0.0000 | 0.0000 | 0.0122 |
| CDKN1A_P242_F     | 0.0000 | 0.0000 | 0.0065 | 0.0000 | 0.0013 | 0.0000 | 0.0000 | 0.0089 | 0.0000 | 0.0122 | 0.0000 | 0.0000 | 0.0000 | 0.0000 | 0.0000 | 0.1354 |
| CDKN1B_P1161_F    | 0.0285 | 0.0000 | 0.0000 | 0.0000 | 0.0000 | 0.0012 | 0.0000 | 0.0000 | 0.0000 | 0.8703 | 0.0000 | 0.0000 | 0.0031 | 0.0000 | 0.0000 | 0.0000 |
| CDKN2A_E121_R     | 0.0186 | 0.0064 | 0.0086 | 0.0000 | 0.0051 | 0.0044 | 0.0086 | 0.0099 | 0.0000 | 0.0589 | 0.0000 | 0.0000 | 0.0078 | 0.0000 | 0.0058 | 0.0047 |
| CDKN2B_E220_F     | 0.2915 | 0.0000 | 0.0192 | 0.0000 | 0.0069 | 0.0000 | 0.0000 | 0.8009 | 0.0000 | 0.0000 | 0.0000 | 0.0000 | 0.0000 | 0.0000 | 0.0033 | 0.0032 |
| CDM_seq_21_S260_R | 0.0000 | 0.0000 | 0.0067 | 0.0052 | 0.0082 | 0.0000 | 0.0000 | 0.0078 | 0.0000 | 0.0075 | 0.0129 | 0.0015 | 0.0000 | 0.0000 | 0.0000 | 0.0097 |
| CEACAM1_E57_R     | 0.0097 | 0.0048 | 0.0057 | 0.0000 | 0.0005 | 0.0000 | 0.0000 | 0.0063 | 0.0000 | 0.0054 | 0.0072 | 0.0047 | 0.0036 | 0.0000 | 0.0000 | 0.0046 |
| CEACAM1_P44_R     | 0.0204 | 0.0815 | 0.0156 | 0.2542 | 0.0100 | 0.2391 | 0.1312 | 0.0114 | 0.0000 | 0.0229 | 0.0000 | 0.0102 | 0.0000 | 0.0000 | 0.0121 | 0.0055 |
| CEBPA_P1163_R     | 0.0161 | 0.1771 | 0.0308 | 0.0115 | 0.0165 | 0.1479 | 0.0121 | 0.0213 | 0.0000 | 0.1526 | 0.1050 | 0.1444 | 0.0094 | 0.2341 | 0.0228 | 0.0094 |
| CEBPA_P706_F      | 0.2435 | 0.9927 | 0.0000 | 0.0000 | 0.0000 | 0.0000 | 0.0053 | 0.0117 | 0.7978 | 0.0000 | 0.0000 | 0.0052 | 0.0094 | 0.0000 | 0.0000 | 0.0000 |
| CFTR_P115_F       | 0.0689 | 0.0064 | 0.0070 | 0.0030 | 0.5896 | 0.0035 | 0.0026 | 0.0134 | 0.0000 | 0.0195 | 0.0000 | 0.0086 | 0.0082 | 0.0000 | 0.0000 | 0.0000 |
| CHD2_P451_F       | 0.0068 | 0.0000 | 0.0000 | 0.0031 | 0.0000 | 0.9911 | 0.0000 | 0.9007 | 0.0000 | 0.0000 | 0.0000 | 0.0000 | 0.9939 | 0.0000 | 0.0000 | 0.0000 |
| CHFR_P501_F       | 0.0071 | 0.0034 | 0.0095 | 0.0045 | 0.0006 | 0.0061 | 0.0063 | 0.0075 | 0.0000 | 0.0040 | 0.0057 | 0.0000 | 0.0013 | 0.0000 | 0.0000 | 0.0029 |
| CHFR_P635_R       | 0.9918 | 0.9895 | 0.7137 | 0.9470 | 0.9846 | 0.8880 | 0.2767 | 0.7490 | 0.9907 | 0.7114 | 0.9728 | 0.0000 | 0.9955 | 0.9473 | 0.9872 | 0.8954 |
| CHGA_E52_F        | 0.0204 | 0.0000 | 0.0000 | 0.0055 | 0.0000 | 0.0057 | 0.0218 | 0.0010 | 0.0000 | 0.0000 | 0.0651 | 0.0050 | 0.0000 | 0.0000 | 0.0000 | 0.0035 |
| CHI3L2_E10_F      | 0.0732 | 0.0000 | 0.3129 | 0.0071 | 0.0290 | 0.0071 | 0.0121 | 0.4141 | 0.8164 | 0.0072 | 0.0096 | 0.6821 | 0.0061 | 0.1825 | 0.0073 | 0.0077 |
| CLK1_P538_F       | 0.0000 | 0.0000 | 0.0000 | 0.0000 | 0.0000 | 0.0013 | 0.0000 | 0.0011 | 0.0000 | 0.0000 | 0.0060 | 0.0000 | 0.0000 | 0.0000 | 0.0000 | 0.0000 |
| COL18A1_P365_R    | 0.1900 | 0.0149 | 0.0162 | 0.0069 | 0.0159 | 0.9890 | 0.0115 | 0.0127 | 0.0000 | 0.0149 | 0.2211 | 0.0155 | 0.2300 | 0.0000 | 0.0041 | 0.0090 |
| COL1A1_P5_F       | 0.0000 | 0.0068 | 0.0000 | 0.0027 | 0.0000 | 0.0000 | 0.0000 | 0.0003 | 0.0000 | 0.0000 | 0.0000 | 0.0000 | 0.0000 | 0.0000 | 0.0000 | 0.0000 |
| COL1A2_E299_F     | 0.0117 | 0.0119 | 0.0096 | 0.2488 | 0.0088 | 0.2855 | 0.0097 | 0.1789 | 0.0000 | 0.7218 | 0.0000 | 0.0063 | 0.4761 | 0.1308 | 0.4913 | 0.0060 |
| COL1A2_P407_R     | 0.0000 | 0.0031 | 0.0030 | 0.0000 | 0.0029 | 0.0037 | 0.0000 | 0.0000 | 0.0000 | 0.0042 | 0.0000 | 0.0000 | 0.0000 | 0.5200 | 0.0000 | 0.0000 |
| COL1A2_P48_R      | 0.0305 | 0.1198 | 0.0405 | 0.0341 | 0.1558 | 0.0234 | 0.0293 | 0.0247 | 0.0000 | 0.1310 | 0.1945 | 0.0223 | 0.0345 | 0.0000 | 0.0525 | 0.0148 |
| COL4A3_E205_R     | 0.0126 | 0.0000 | 0.0000 | 0.0000 | 0.0000 | 0.0000 | 0.9567 | 0.0002 | 0.0000 | 0.0000 | 0.0000 | 0.0022 | 0.0000 | 0.0000 | 0.0000 | 0.0000 |
| COL4A3_P545_F     | 0.1140 | 0.5500 | 0.0797 | 0.8556 | 0.1423 | 0.8402 | 0.7360 | 0.0324 | 0.0000 | 0.7472 | 0.7647 | 0.7713 | 0.7522 | 0.0123 | 0.0659 | 0.7481 |
| COL6A1_P283_F     | 0.8292 | 0.0184 | 0.0300 | 0.0089 | 0.4735 | 0.0296 | 0.0188 | 0.0360 | 0.8002 | 0.3390 | 0.0096 | 0.1151 | 0.7026 | 0.0000 | 0.0419 | 0.0531 |
| COL6A1_P425_F     | 0.0000 | 0.0000 | 0.0157 | 0.0104 | 0.0041 | 0.2608 | 0.0081 | 0.0151 | 0.0000 | 0.0422 | 0.1712 | 0.0081 | 0.3388 | 0.0000 | 0.0026 | 0.9884 |
| COPG2_P298_F      | 0.1185 | 0.6003 | 0.0657 | 0.6283 | 0.1434 | 0.5962 | 0.5308 | 0.0613 | 0.0556 | 0.5995 | 0.6066 | 0.1124 | 0.5890 | 0.0325 | 0.0748 | 0.0689 |
| CPA4_P1265_R      | 0.0573 | 0.7786 | 0.0642 | 0.7184 | 0.8083 | 0.0147 | 0.0405 | 0.6703 | 0.0000 | 0.0404 | 0.7707 | 0.0497 | 0.7208 | 0.0073 | 0.0912 | 0.5926 |
| CREB1_P819_F      | 0.0000 | 0.0166 | 0.0130 | 0.0000 | 0.0071 | 0.0000 | 0.0000 | 0.0086 | 0.0000 | 0.0000 | 0.0097 | 0.0509 | 0.0049 | 0.0000 | 0.0018 | 0.0000 |
| CRIP1_P874_R      | 0.0215 | 0.9942 | 0.8475 | 0.4967 | 0.0124 | 0.0104 | 0.3174 | 0.0178 | 0.0000 | 0.4871 | 0.0130 | 0.0102 | 0.3921 | 0.0004 | 0.1707 | 0.2020 |
| CRK_P721_F        | 0.0119 | 0.0063 | 0.0573 | 0.0061 | 0.0061 | 0.0058 | 0.0043 | 0.0053 | 0.0000 | 0.0066 | 0.0094 | 0.0057 | 0.0050 | 0.0053 | 0.0214 | 0.0051 |

|               |        |        |        |        |        |        |        |        |        |        |        |        |        |        |        |        |
|---------------|--------|--------|--------|--------|--------|--------|--------|--------|--------|--------|--------|--------|--------|--------|--------|--------|
| CSF1_P217_F   | 0.1410 | 0.0119 | 0.0301 | 0.3040 | 0.0183 | 0.9910 | 0.0502 | 0.0241 | 0.9889 | 0.1149 | 0.1460 | 0.0997 | 0.1935 | 0.5181 | 0.7229 | 0.0084 |
| CSF1_P339_F   | 0.0000 | 0.0000 | 0.0000 | 0.0000 | 0.0000 | 0.0000 | 0.0000 | 0.0042 | 0.0000 | 0.0011 | 0.0000 | 0.0000 | 0.0000 | 0.0000 | 0.0000 | 0.0000 |
| CSF1R_E26_F   | 0.0099 | 0.0099 | 0.0049 | 0.0000 | 0.0015 | 0.0062 | 0.0044 | 0.0080 | 0.0000 | 0.0000 | 0.0000 | 0.0063 | 0.0000 | 0.0000 | 0.0000 | 0.0000 |
| CSF3R_P472_F  | 0.1592 | 0.0235 | 0.1626 | 0.0518 | 0.1715 | 0.0133 | 0.0353 | 0.0416 | 0.0000 | 0.0315 | 0.1259 | 0.1660 | 0.1554 | 0.0241 | 0.0424 | 0.0360 |
| CSPG2_E38_F   | 0.0060 | 0.0000 | 0.0114 | 0.0040 | 0.0037 | 0.0000 | 0.0054 | 0.0068 | 0.0000 | 0.0000 | 0.0041 | 0.0065 | 0.0059 | 0.0000 | 0.0006 | 0.0000 |
| CSPG2_P82_R   | 0.0105 | 0.3390 | 0.0092 | 0.0000 | 0.0013 | 0.0000 | 0.0000 | 0.0148 | 0.0000 | 0.0000 | 0.0087 | 0.0091 | 0.0044 | 0.0000 | 0.0002 | 0.0045 |
| CSTB_E410_F   | 0.0000 | 0.9934 | 0.8329 | 0.0000 | 0.9820 | 0.0056 | 0.0032 | 0.6716 | 0.9848 | 0.0409 | 0.0000 | 0.0967 | 0.0068 | 0.9491 | 0.9809 | 0.0000 |
| CTAG1B_P4_R   | 0.0000 | 0.0000 | 0.0008 | 0.0000 | 0.0055 | 0.0000 | 0.0013 | 0.0000 | 0.0000 | 0.0112 | 0.0000 | 0.0000 | 0.0000 | 0.0000 | 0.6018 | 0.9869 |
| CTAG1B_P77_F  | 0.3423 | 0.0172 | 0.0373 | 0.0215 | 0.6399 | 0.0145 | 0.8605 | 0.0364 | 0.0515 | 0.0149 | 0.4057 | 0.3228 | 0.0174 | 0.2710 | 0.1815 | 0.0993 |
| CTAG2_P1426_F | 0.8007 | 0.0231 | 0.0634 | 0.6377 | 0.0530 | 0.6581 | 0.0184 | 0.0163 | 0.0000 | 0.6758 | 0.7552 | 0.6005 | 0.7564 | 0.0000 | 0.0275 | 0.5821 |
| CTGF_E156_F   | 0.0000 | 0.0000 | 0.0023 | 0.0025 | 0.0000 | 0.0000 | 0.0000 | 0.0026 | 0.0000 | 0.0000 | 0.0000 | 0.0050 | 0.0000 | 0.0000 | 0.0000 | 0.0037 |
| CTLA4_P1128_F | 0.9218 | 0.1197 | 0.7109 | 0.6785 | 0.5903 | 0.9663 | 0.9822 | 0.4064 | 0.2832 | 0.9916 | 0.9746 | 0.6421 | 0.9887 | 0.1356 | 0.0000 | 0.1692 |
| CTNNA1_P185_R | 0.0125 | 0.0063 | 0.0067 | 0.0031 | 0.0035 | 0.0000 | 0.0000 | 0.0050 | 0.0000 | 0.0000 | 0.0000 | 0.0000 | 0.0060 | 0.0000 | 0.0018 | 0.0025 |
| CTNNA1_P382_R | 0.0098 | 0.1376 | 0.0095 | 0.0000 | 0.0000 | 0.0050 | 0.0000 | 0.0059 | 0.0000 | 0.1484 | 0.0000 | 0.0056 | 0.1741 | 0.0000 | 0.0082 | 0.0046 |
| CTNNB1_P757_F | 0.0153 | 0.0836 | 0.0104 | 0.0088 | 0.0674 | 0.0063 | 0.0454 | 0.0659 | 0.0000 | 0.0633 | 0.0413 | 0.0078 | 0.0058 | 0.0000 | 0.0229 | 0.0070 |
| CTSD_P726_F   | 0.0000 | 0.0000 | 0.0000 | 0.0000 | 0.0000 | 0.0000 | 0.0000 | 0.0007 | 0.0000 | 0.0000 | 0.0000 | 0.0000 | 0.0000 | 0.0000 | 0.0000 | 0.0000 |
| CTSH_P238_F   | 0.0000 | 0.0000 | 0.0088 | 0.0000 | 0.0000 | 0.0051 | 0.0000 | 0.0000 | 0.0000 | 0.0000 | 0.0000 | 0.0330 | 0.0000 | 0.0000 | 0.0000 | 0.0000 |
| CTSL_P264_R   | 0.0000 | 0.0021 | 0.0083 | 0.0009 | 0.9769 | 0.0688 | 0.0048 | 0.0076 | 0.0000 | 0.0000 | 0.0000 | 0.0000 | 0.0059 | 0.0000 | 0.0000 | 0.0043 |
| CTSL_P81_F    | 0.1342 | 0.0094 | 0.8800 | 0.0062 | 0.0000 | 0.0085 | 0.0038 | 0.0074 | 0.0000 | 0.0000 | 0.0000 | 0.0058 | 0.0117 | 0.0000 | 0.0000 | 0.0063 |
| CTTN_E29_R    | 0.0000 | 0.0000 | 0.0108 | 0.0044 | 0.0038 | 0.0086 | 0.0056 | 0.0081 | 0.0000 | 0.0000 | 0.0102 | 0.0166 | 0.0000 | 0.0000 | 0.0089 | 0.0058 |
| CYP1A1_P382_F | 0.0445 | 0.0125 | 0.0212 | 0.6344 | 0.0222 | 0.0174 | 0.3679 | 0.0323 | 0.0000 | 0.4752 | 0.0251 | 0.1989 | 0.3254 | 0.0000 | 0.0638 | 0.5466 |
| CYP2E1_P416_F | 0.1127 | 0.0364 | 0.0157 | 0.1511 | 0.0196 | 0.0024 | 0.0000 | 0.0133 | 0.0000 | 0.0000 | 0.0000 | 0.0133 | 0.0097 | 0.0000 | 0.0141 | 0.0000 |
| DAB2_P35_F    | 0.0217 | 0.0000 | 0.0000 | 0.0057 | 0.0000 | 0.0000 | 0.0000 | 0.0000 | 0.0000 | 0.0120 | 0.0000 | 0.0000 | 0.0070 | 0.0000 | 0.0000 | 0.0021 |
| DAB2_P468_F   | 0.0907 | 0.0278 | 0.0307 | 0.0358 | 0.0525 | 0.4540 | 0.0170 | 0.0247 | 0.0000 | 0.1223 | 0.0163 | 0.1499 | 0.0108 | 0.0433 | 0.0751 | 0.0239 |
| DAB2IP_P9_F   | 0.0000 | 0.0026 | 0.0000 | 0.0000 | 0.0000 | 0.0000 | 0.0012 | 0.0066 | 0.0000 | 0.0005 | 0.0055 | 0.0000 | 0.0000 | 0.0000 | 0.0000 | 0.0000 |
| DAPK1_P10_F   | 0.0000 | 0.0050 | 0.0079 | 0.0000 | 0.0045 | 0.9918 | 0.0000 | 0.5042 | 0.0000 | 0.0000 | 0.0000 | 0.0022 | 0.0047 | 0.0000 | 0.0000 | 0.0000 |
| DAPK1_P345_R  | 0.0000 | 0.0000 | 0.0045 | 0.0000 | 0.8104 | 0.0000 | 0.0000 | 0.0000 | 0.0000 | 0.0000 | 0.0000 | 0.0038 | 0.9937 | 0.0000 | 0.0000 | 0.0025 |
| DBC1_P351_R   | 0.0000 | 0.0044 | 0.6857 | 0.0000 | 0.0000 | 0.0023 | 0.0000 | 0.0000 | 0.0000 | 0.0000 | 0.0088 | 0.0000 | 0.0000 | 0.0000 | 0.0000 | 0.0000 |
| DCC_P177_F    | 0.2983 | 0.4449 | 0.0139 | 0.0069 | 0.0107 | 0.0123 | 0.0072 | 0.0113 | 0.0000 | 0.0000 | 0.0000 | 0.0054 | 0.0078 | 0.1945 | 0.0141 | 0.0000 |
| DCC_P471_R    | 0.1964 | 0.1808 | 0.0185 | 0.0226 | 0.0337 | 0.0085 | 0.0096 | 0.0202 | 0.0000 | 0.1937 | 0.0111 | 0.1700 | 0.2218 | 0.0017 | 0.0107 | 0.0068 |
| DCN_P1320_R   | 0.0000 | 0.0000 | 0.0000 | 0.0000 | 0.0000 | 0.0000 | 0.0000 | 0.0021 | 0.0000 | 0.0000 | 0.0199 | 0.0000 | 0.0000 | 0.0000 | 0.0000 | 0.0000 |
| DDB2_P407_F   | 0.0138 | 0.0000 | 0.0000 | 0.0001 | 0.0000 | 0.0057 | 0.0000 | 0.0000 | 0.0000 | 0.0000 | 0.0000 | 0.0000 | 0.0000 | 0.0000 | 0.5740 | 0.0000 |
| DDB2_P613_R   | 0.4017 | 0.2802 | 0.1698 | 0.1488 | 0.0060 | 0.0104 | 0.0527 | 0.0092 | 0.0000 | 0.0000 | 0.0103 | 0.0086 | 0.0049 | 0.0000 | 0.0025 | 0.0000 |

|                     |        |        |        |        |        |        |        |        |        |        |        |        |        |        |        |        |
|---------------------|--------|--------|--------|--------|--------|--------|--------|--------|--------|--------|--------|--------|--------|--------|--------|--------|
| DDR1_E23_R          | 0.0000 | 0.0000 | 0.0120 | 0.0000 | 0.0092 | 0.0000 | 0.0000 | 0.0091 | 0.0000 | 0.0096 | 0.0000 | 0.0055 | 0.0041 | 0.0000 | 0.0059 | 0.0062 |
| DDR2_E331_F         | 0.2938 | 0.9931 | 0.9812 | 0.9855 | 0.9818 | 0.0064 | 0.0058 | 0.1779 | 0.9846 | 0.0000 | 0.0000 | 0.0000 | 0.9929 | 0.9785 | 0.9873 | 0.1877 |
| DES_E228_R          | 0.0000 | 0.0000 | 0.0000 | 0.0061 | 0.0086 | 0.0000 | 0.0000 | 0.0000 | 0.0000 | 0.0000 | 0.0000 | 0.0000 | 0.0000 | 0.0000 | 0.0023 | 0.0070 |
| DHCR24_P406_R       | 0.0244 | 0.0126 | 0.2321 | 0.0087 | 0.0164 | 0.3993 | 0.0150 | 0.8737 | 0.0000 | 0.7332 | 0.0124 | 0.0112 | 0.0138 | 0.0010 | 0.0109 | 0.0173 |
| DIO3_E230_R         | 0.0000 | 0.0000 | 0.0143 | 0.0081 | 0.0102 | 0.0000 | 0.0059 | 0.0075 | 0.0000 | 0.0000 | 0.0000 | 0.0102 | 0.0076 | 0.0000 | 0.0003 | 0.0049 |
| DIO3_P674_F         | 0.2828 | 0.0122 | 0.0162 | 0.0126 | 0.0212 | 0.3131 | 0.0076 | 0.9851 | 0.0000 | 0.3140 | 0.9964 | 0.0096 | 0.1779 | 0.2591 | 0.8976 | 0.9739 |
| DIRAS3_E55_R        | 0.0188 | 0.3360 | 0.0276 | 0.0145 | 0.0469 | 0.0143 | 0.0123 | 0.0137 | 0.0000 | 0.0000 | 0.0000 | 0.0151 | 0.0000 | 0.0000 | 0.0207 | 0.0000 |
| DKC1_E101_F         | 0.0719 | 0.0000 | 0.0011 | 0.0000 | 0.0000 | 0.0000 | 0.0000 | 0.0000 | 0.0000 | 0.0000 | 0.0000 | 0.0000 | 0.0000 | 0.0000 | 0.0000 | 0.0000 |
| DKFZP564O0823_E45_F | 0.0000 | 0.0000 | 0.0038 | 0.0000 | 0.0000 | 0.0000 | 0.0037 | 0.0009 | 0.0000 | 0.0000 | 0.0076 | 0.0000 | 0.0032 | 0.0000 | 0.0000 | 0.0000 |
| DLC1_P88_R          | 0.0086 | 0.0000 | 0.0000 | 0.0000 | 0.0000 | 0.0000 | 0.0000 | 0.9250 | 0.0000 | 0.0000 | 0.0000 | 0.0000 | 0.0020 | 0.0000 | 0.0000 | 0.0000 |
| DLK1_E227_R         | 0.9660 | 0.9973 | 0.9966 | 0.9971 | 0.9860 | 0.9967 | 0.9775 | 0.9848 | 0.9950 | 0.9969 | 0.9980 | 0.9966 | 0.9975 | 0.9941 | 0.9940 | 0.8344 |
| DLL1_P386_F         | 0.0000 | 0.0000 | 0.9744 | 0.9887 | 0.9779 | 0.0000 | 0.0000 | 0.9384 | 0.0000 | 0.0000 | 0.0093 | 0.0000 | 0.0049 | 0.8036 | 0.9777 | 0.9869 |
| DLL1_P832_F         | 0.0090 | 0.0082 | 0.4221 | 0.0101 | 0.0024 | 0.0000 | 0.0000 | 0.0097 | 0.0000 | 0.0000 | 0.0000 | 0.0051 | 0.0000 | 0.2892 | 0.0026 | 0.0039 |
| DMP1_P134_F         | 0.0191 | 0.0232 | 0.0230 | 0.2381 | 0.1500 | 0.2134 | 0.0208 | 0.0216 | 0.0000 | 0.0101 | 0.1336 | 0.1686 | 0.0124 | 0.0096 | 0.0270 | 0.2151 |
| DNAJC15_E26_R       | 0.0458 | 0.0063 | 0.1035 | 0.0083 | 0.2735 | 0.0044 | 0.0043 | 0.0131 | 0.0000 | 0.0000 | 0.0291 | 0.0058 | 0.0000 | 0.0000 | 0.0116 | 0.0042 |
| DNASE1L1_P108_F     | 0.6359 | 0.5875 | 0.0388 | 0.7504 | 0.9886 | 0.9938 | 0.2253 | 0.9888 | 0.8609 | 0.6161 | 0.6372 | 0.8114 | 0.4558 | 0.9306 | 0.9188 | 0.5784 |
| DNMT1_P100_R        | 0.9951 | 0.9925 | 0.9823 | 0.9904 | 0.9876 | 0.3981 | 0.8056 | 0.9906 | 0.9872 | 0.1485 | 0.3975 | 0.9418 | 0.9927 | 0.9888 | 0.9817 | 0.9909 |
| DSC2_E90_F          | 0.0000 | 0.0000 | 0.0000 | 0.9704 | 0.9457 | 0.0000 | 0.7441 | 0.9802 | 0.9702 | 0.6322 | 0.0000 | 0.0000 | 0.0000 | 0.9250 | 0.8810 | 0.0000 |
| DSP_P440_R          | 0.5261 | 0.4328 | 0.0341 | 0.6630 | 0.9853 | 0.6915 | 0.0154 | 0.4029 | 0.9882 | 0.5531 | 0.9979 | 0.3873 | 0.3748 | 0.9901 | 0.9822 | 0.7562 |
| DST_E31_F           | 0.0118 | 0.8558 | 0.3051 | 0.0042 | 0.0555 | 0.9825 | 0.0066 | 0.3760 | 0.6287 | 0.1970 | 0.9964 | 0.7556 | 0.1558 | 0.9037 | 0.9844 | 0.9927 |
| DST_P262_R          | 0.1633 | 0.9138 | 0.0950 | 0.0992 | 0.8361 | 0.4614 | 0.0440 | 0.1076 | 0.0349 | 0.0267 | 0.6472 | 0.0315 | 0.8907 | 0.0774 | 0.2899 | 0.8989 |
| DUSP4_E61_F         | 0.0000 | 0.0000 | 0.0000 | 0.0695 | 0.0066 | 0.1681 | 0.0066 | 0.0074 | 0.0000 | 0.0098 | 0.0000 | 0.0047 | 0.0000 | 0.0000 | 0.0037 | 0.0375 |
| DUSP4_P925_R        | 0.1874 | 0.0919 | 0.0339 | 0.6393 | 0.0343 | 0.0145 | 0.0233 | 0.6313 | 0.0000 | 0.0000 | 0.2211 | 0.0249 | 0.0071 | 0.0001 | 0.0405 | 0.4408 |
| E2F3_P840_R         | 0.0184 | 0.0053 | 0.9747 | 0.0062 | 0.0000 | 0.0051 | 0.0000 | 0.0084 | 0.0000 | 0.0000 | 0.0071 | 0.0063 | 0.0000 | 0.7655 | 0.4736 | 0.0024 |
| E2F5_P516_R         | 0.9819 | 0.0721 | 0.1610 | 0.9696 | 0.0670 | 0.0219 | 0.9728 | 0.9798 | 0.0000 | 0.0000 | 0.0000 | 0.9866 | 0.9813 | 0.9440 | 0.9704 | 0.9522 |
| EDN1_E50_R          | 0.9705 | 0.9905 | 0.6079 | 0.5319 | 0.9883 | 0.9841 | 0.9772 | 0.2410 | 0.5995 | 0.7557 | 0.9623 | 0.5884 | 0.9884 | 0.3207 | 0.8629 | 0.8821 |
| EDN1_P39_R          | 0.9531 | 0.0266 | 0.4669 | 0.9575 | 0.6763 | 0.0822 | 0.4280 | 0.0200 | 0.0000 | 0.0099 | 0.0177 | 0.9439 | 0.7179 | 0.0000 | 0.0129 | 0.0217 |
| EDNRB_P148_R        | 0.7224 | 0.9920 | 0.4155 | 0.0000 | 0.4317 | 0.0000 | 0.9080 | 0.9727 | 0.9903 | 0.9937 | 0.0000 | 0.9885 | 0.0000 | 0.8138 | 0.9660 | 0.9895 |
| EFNA1_P591_R        | 0.1073 | 0.1419 | 0.0000 | 0.0000 | 0.0000 | 0.0000 | 0.0000 | 0.0078 | 0.0000 | 0.3582 | 0.0156 | 0.0117 | 0.1608 | 0.0000 | 0.0000 | 0.0000 |
| EFNA1_P7_F          | 0.0000 | 0.9932 | 0.6847 | 0.0000 | 0.0000 | 0.0000 | 0.0000 | 0.9551 | 0.9920 | 0.6785 | 0.0000 | 0.0017 | 0.0000 | 0.0000 | 0.0000 | 0.6370 |
| EFNB1_E69_F         | 0.0000 | 0.0119 | 0.0083 | 0.0000 | 0.0000 | 0.0071 | 0.0047 | 0.1236 | 0.0000 | 0.0000 | 0.0000 | 0.0109 | 0.0000 | 0.0000 | 0.0000 | 0.9926 |
| EFNB3_P442_R        | 0.0095 | 0.0055 | 0.0106 | 0.0000 | 0.0000 | 0.0000 | 0.0000 | 0.0062 | 0.0000 | 0.0000 | 0.0000 | 0.0000 | 0.0069 | 0.0000 | 0.0000 | 0.0000 |
| EGF_E339_F          | 0.0000 | 0.0000 | 0.0035 | 0.0004 | 0.0000 | 0.9492 | 0.0047 | 0.8216 | 0.0000 | 0.0000 | 0.0000 | 0.0016 | 0.0000 | 0.0000 | 0.5534 | 0.0000 |

|                |        |        |        |        |        |        |        |        |        |        |        |        |        |        |        |        |
|----------------|--------|--------|--------|--------|--------|--------|--------|--------|--------|--------|--------|--------|--------|--------|--------|--------|
| EGFR_E295_R    | 0.0309 | 0.1900 | 0.0114 | 0.0065 | 0.0067 | 0.0000 | 0.0000 | 0.0072 | 0.0000 | 0.0099 | 0.0122 | 0.0058 | 0.0056 | 0.0000 | 0.0050 | 0.0000 |
| EGFR_P260_R    | 0.0026 | 0.6599 | 0.0060 | 0.0000 | 0.9830 | 0.0015 | 0.0000 | 0.0000 | 0.0000 | 0.0000 | 0.0085 | 0.0050 | 0.0000 | 0.5428 | 0.0000 | 0.9900 |
| EGR4_P479_F    | 0.9870 | 0.7548 | 0.5235 | 0.9885 | 0.8556 | 0.5667 | 0.0754 | 0.3479 | 0.9862 | 0.0193 | 0.3915 | 0.4246 | 0.9941 | 0.8849 | 0.8303 | 0.0189 |
| EIF2AK2_E103_R | 0.0000 | 0.0000 | 0.0000 | 0.0000 | 0.0000 | 0.0000 | 0.0000 | 0.9842 | 0.9903 | 0.9965 | 0.0000 | 0.0000 | 0.0000 | 0.9726 | 0.9710 | 0.0000 |
| EIF2AK2_P313_F | 0.0000 | 0.9943 | 0.9920 | 0.9920 | 0.7791 | 0.0000 | 0.2910 | 0.8998 | 0.0000 | 0.0414 | 0.0074 | 0.9920 | 0.4150 | 0.9768 | 0.9888 | 0.9909 |
| ELK1_E156_F    | 0.0000 | 0.9924 | 0.0000 | 0.0000 | 0.7915 | 0.0000 | 0.0000 | 0.9765 | 0.0000 | 0.1076 | 0.0000 | 0.8118 | 0.0000 | 0.9051 | 0.9014 | 0.0000 |
| EMR3_P39_R     | 0.2790 | 0.3465 | 0.4908 | 0.0163 | 0.5455 | 0.9925 | 0.8181 | 0.4505 | 0.0000 | 0.0193 | 0.2639 | 0.9848 | 0.9437 | 0.5177 | 0.0277 | 0.3111 |
| ENC1_P484_R    | 0.9941 | 0.8210 | 0.9829 | 0.9866 | 0.9818 | 0.0148 | 0.9900 | 0.7029 | 0.9877 | 0.0000 | 0.0164 | 0.9937 | 0.9930 | 0.9894 | 0.9867 | 0.1831 |
| EPHA1_E46_R    | 0.2444 | 0.0409 | 0.3886 | 0.0361 | 0.0794 | 0.1735 | 0.0140 | 0.3593 | 0.7365 | 0.0400 | 0.0453 | 0.0403 | 0.0249 | 0.6183 | 0.2558 | 0.0256 |
| EPHA1_P119_R   | 0.0000 | 0.0081 | 0.0113 | 0.0067 | 0.4676 | 0.0000 | 0.3220 | 0.0055 | 0.4112 | 0.0000 | 0.0000 | 0.0000 | 0.0000 | 0.0000 | 0.0024 | 0.0040 |
| EPHA2_P203_F   | 0.0000 | 0.0082 | 0.0067 | 0.0000 | 0.4293 | 0.0052 | 0.0050 | 0.0077 | 0.4778 | 0.0071 | 0.0107 | 0.9914 | 0.0049 | 0.2462 | 0.4695 | 0.0041 |
| EPHA3_E156_R   | 0.0000 | 0.0000 | 0.0000 | 0.0000 | 0.0000 | 0.0013 | 0.0000 | 0.0000 | 0.0000 | 0.0000 | 0.0051 | 0.0012 | 0.0000 | 0.0000 | 0.0000 | 0.0000 |
| EPHA7_E6_F     | 0.0106 | 0.0234 | 0.1523 | 0.9928 | 0.0063 | 0.0035 | 0.0040 | 0.3096 | 0.9881 | 0.0062 | 0.0000 | 0.0040 | 0.0055 | 0.4446 | 0.3497 | 0.0032 |
| EPHA7_P205_R   | 0.9830 | 0.0327 | 0.9935 | 0.8774 | 0.9412 | 0.9896 | 0.9136 | 0.9878 | 0.9922 | 0.1778 | 0.9914 | 0.8961 | 0.9193 | 0.9901 | 0.9405 | 0.9916 |
| EPHA8_P256_F   | 0.0191 | 0.0188 | 0.0266 | 0.0394 | 0.0430 | 0.1572 | 0.0126 | 0.0963 | 0.0000 | 0.1063 | 0.1399 | 0.0231 | 0.1587 | 0.2348 | 0.1716 | 0.0122 |
| EPHB1_P503_F   | 0.0111 | 0.0094 | 0.3500 | 0.0067 | 0.0093 | 0.6588 | 0.0085 | 0.7436 | 0.4885 | 0.0110 | 0.0000 | 0.9537 | 0.0076 | 0.1310 | 0.2275 | 0.6187 |
| EPHB2_E297_F   | 0.8238 | 0.8403 | 0.7998 | 0.7489 | 0.8610 | 0.7252 | 0.7106 | 0.0474 | 0.0000 | 0.2180 | 0.7407 | 0.7601 | 0.7969 | 0.0000 | 0.0473 | 0.6938 |
| EPHB2_P165_R   | 0.0000 | 0.0064 | 0.0079 | 0.0000 | 0.0025 | 0.0000 | 0.0000 | 0.9800 | 0.0000 | 0.0002 | 0.0000 | 0.0000 | 0.0380 | 0.0000 | 0.0000 | 0.0137 |
| EPHB3_E0_F     | 0.0000 | 0.0000 | 0.9837 | 0.9884 | 0.6671 | 0.0000 | 0.0000 | 0.0000 | 0.0000 | 0.0000 | 0.0000 | 0.0000 | 0.0000 | 0.0000 | 0.0000 | 0.0011 |
| EPHB3_P569_R   | 0.0219 | 0.1668 | 0.0289 | 0.3996 | 0.3493 | 0.4041 | 0.1855 | 0.0191 | 0.0000 | 0.1595 | 0.0244 | 0.4617 | 0.2989 | 0.0012 | 0.0135 | 0.2159 |
| EPHB4_P313_R   | 0.5063 | 0.6452 | 0.0353 | 0.0389 | 0.0566 | 0.7051 | 0.0000 | 0.0447 | 0.3180 | 0.0750 | 0.0000 | 0.5168 | 0.1970 | 0.2945 | 0.9627 | 0.2807 |
| EPHB6_E342_F   | 0.0123 | 0.1606 | 0.7550 | 0.0497 | 0.0302 | 0.8026 | 0.3286 | 0.7335 | 0.0000 | 0.0000 | 0.0129 | 0.5317 | 0.6316 | 0.0000 | 0.1128 | 0.0270 |
| EPHB6_P827_R   | 0.0100 | 0.0000 | 0.0000 | 0.0003 | 0.0000 | 0.0000 | 0.0038 | 0.0172 | 0.0000 | 0.0000 | 0.0000 | 0.0020 | 0.0051 | 0.0000 | 0.0000 | 0.0000 |
| EPHX1_P1358_R  | 0.0042 | 0.0155 | 0.0000 | 0.0000 | 0.0000 | 0.0000 | 0.0000 | 0.9732 | 0.0000 | 0.0059 | 0.0000 | 0.9898 | 0.0098 | 0.9484 | 0.9787 | 0.9896 |
| EPM2A_P113_F   | 0.1009 | 0.0612 | 0.6970 | 0.1487 | 0.1106 | 0.8175 | 0.0413 | 0.6775 | 0.0000 | 0.8869 | 0.8988 | 0.8394 | 0.8228 | 0.0350 | 0.0825 | 0.7415 |
| EPM2A_P64_R    | 0.0213 | 0.0162 | 0.0415 | 0.6001 | 0.0465 | 0.0138 | 0.3511 | 0.5580 | 0.0000 | 0.4539 | 0.4797 | 0.5087 | 0.4721 | 0.0000 | 0.0277 | 0.6070 |
| EPO_E244_R     | 0.0021 | 0.0000 | 0.0048 | 0.0000 | 0.0000 | 0.0000 | 0.0000 | 0.0017 | 0.0000 | 0.0000 | 0.0000 | 0.0033 | 0.0000 | 0.0000 | 0.0000 | 0.0000 |
| EPO_P162_R     | 0.0089 | 0.0000 | 0.4561 | 0.0117 | 0.0000 | 0.0000 | 0.0022 | 0.0047 | 0.0000 | 0.0000 | 0.0000 | 0.0012 | 0.0000 | 0.0000 | 0.6404 | 0.0006 |
| EPS8_E231_F    | 0.1241 | 0.0146 | 0.0000 | 0.0000 | 0.9888 | 0.0000 | 0.0000 | 0.6589 | 0.0000 | 0.0000 | 0.0000 | 0.9880 | 0.9919 | 0.0000 | 0.9599 | 0.0000 |
| EPS8_P437_F    | 0.0124 | 0.0031 | 0.0036 | 0.0000 | 0.0000 | 0.0027 | 0.0055 | 0.0000 | 0.0000 | 0.0000 | 0.0000 | 0.0000 | 0.0000 | 0.7370 | 0.0000 | 0.0000 |
| ERBB2_P59_R    | 0.0000 | 0.0000 | 0.8190 | 0.0000 | 0.0014 | 0.0170 | 0.9930 | 0.0052 | 0.9508 | 0.0051 | 0.0000 | 0.9904 | 0.9934 | 0.8735 | 0.8443 | 0.9921 |
| ERBB3_E331_F   | 0.5548 | 0.0194 | 0.0382 | 0.0285 | 0.6144 | 0.0120 | 0.9426 | 0.0165 | 0.0000 | 0.0185 | 0.6966 | 0.0305 | 0.5602 | 0.3705 | 0.0474 | 0.9915 |
| ERBB3_P870_R   | 0.0000 | 0.1339 | 0.0756 | 0.2894 | 0.0190 | 0.0168 | 0.0000 | 0.0163 | 0.0000 | 0.0000 | 0.0000 | 0.0049 | 0.0115 | 0.3131 | 0.4297 | 0.0059 |



|               |        |        |        |        |        |        |        |        |        |        |        |        |        |        |        |        |
|---------------|--------|--------|--------|--------|--------|--------|--------|--------|--------|--------|--------|--------|--------|--------|--------|--------|
| ERBB4_P255_F  | 0.0121 | 0.0093 | 0.0249 | 0.0146 | 0.0117 | 0.0063 | 0.1570 | 0.0192 | 0.0000 | 0.0069 | 0.0111 | 0.3607 | 0.5084 | 0.0000 | 0.0291 | 0.1824 |
| ERBB4_P541_F  | 0.4220 | 0.1829 | 0.7653 | 0.2656 | 0.9883 | 0.9930 | 0.8947 | 0.9744 | 0.0000 | 0.0000 | 0.0000 | 0.2887 | 0.1601 | 0.8610 | 0.9640 | 0.3065 |
| ERCC1_P354_F  | 0.9955 | 0.6670 | 0.9855 | 0.9857 | 0.7264 | 0.7736 | 0.6983 | 0.8438 | 0.7818 | 0.0000 | 0.0074 | 0.6973 | 0.0000 | 0.8810 | 0.4803 | 0.0044 |
| ERCC3_P1210_R | 0.9954 | 0.2576 | 0.7090 | 0.9907 | 0.0388 | 0.4760 | 0.2134 | 0.5742 | 0.9104 | 0.2628 | 0.3234 | 0.9806 | 0.1735 | 0.9781 | 0.9123 | 0.0154 |
| ERG_E28_F     | 0.0413 | 0.8238 | 0.7535 | 0.5897 | 0.6068 | 0.0168 | 0.6261 | 0.6741 | 0.0000 | 0.0174 | 0.0441 | 0.6014 | 0.0252 | 0.0231 | 0.3506 | 0.0219 |
| ERN1_P809_R   | 0.0688 | 0.0162 | 0.0767 | 0.0000 | 0.9839 | 0.0000 | 0.2883 | 0.0624 | 0.9900 | 0.0000 | 0.0460 | 0.9913 | 0.0046 | 0.9519 | 0.9770 | 0.0000 |
| ESR1_E298_R   | 0.8114 | 0.0261 | 0.2042 | 0.7337 | 0.9898 | 0.7645 | 0.5256 | 0.9245 | 0.9223 | 0.7843 | 0.7980 | 0.7778 | 0.8576 | 0.8363 | 0.7154 | 0.0259 |
| ESR1_P151_R   | 0.0000 | 0.0083 | 0.0117 | 0.0975 | 0.5272 | 0.0945 | 0.2498 | 0.7693 | 0.0000 | 0.0000 | 0.0000 | 0.0063 | 0.1222 | 0.6920 | 0.0012 | 0.1110 |
| ESR2_E66_F    | 0.4040 | 0.4438 | 0.5369 | 0.0486 | 0.5293 | 0.3619 | 0.3026 | 0.0523 | 0.0162 | 0.4673 | 0.4424 | 0.1096 | 0.3667 | 0.6443 | 0.9738 | 0.3943 |
| ESR2_P162_F   | 0.2814 | 0.1252 | 0.0291 | 0.0217 | 0.6859 | 0.3362 | 0.0158 | 0.6634 | 0.0000 | 0.3064 | 0.0191 | 0.0274 | 0.2579 | 0.0274 | 0.5081 | 0.7100 |
| ETS1_E253_R   | 0.2353 | 0.1086 | 0.1962 | 0.0255 | 0.1073 | 0.1575 | 0.1319 | 0.1159 | 0.0000 | 0.0242 | 0.0851 | 0.1281 | 0.0159 | 0.0052 | 0.0340 | 0.1199 |
| ETS1_P559_R   | 0.0000 | 0.0000 | 0.7067 | 0.0000 | 0.9847 | 0.0000 | 0.0000 | 0.9792 | 0.9901 | 0.0000 | 0.0078 | 0.0000 | 0.0000 | 0.9787 | 0.9815 | 0.5299 |
| ETS2_P684_F   | 0.6942 | 0.6378 | 0.0258 | 0.9916 | 0.1107 | 0.7465 | 0.6822 | 0.0152 | 0.0000 | 0.5725 | 0.5979 | 0.0130 | 0.4885 | 0.9328 | 0.0913 | 0.0097 |
| ETS2_P835_F   | 0.1790 | 0.0076 | 0.0208 | 0.0148 | 0.0100 | 0.0000 | 0.0000 | 0.1170 | 0.0000 | 0.0000 | 0.0319 | 0.0047 | 0.0000 | 0.0000 | 0.0000 | 0.0029 |
| ETV1_P235_F   | 0.9922 | 0.9113 | 0.9870 | 0.8240 | 0.0252 | 0.9868 | 0.0068 | 0.8679 | 0.9733 | 0.0000 | 0.0000 | 0.9864 | 0.0025 | 0.9744 | 0.9759 | 0.0000 |
| ETV1_P515_F   | 0.0000 | 0.0475 | 0.0000 | 0.0000 | 0.0000 | 0.2572 | 0.3088 | 0.0037 | 0.0000 | 0.0000 | 0.0000 | 0.0000 | 0.0482 | 0.0000 | 0.0000 | 0.3295 |
| ETV6_E430_F   | 0.0138 | 0.0134 | 0.3812 | 0.0075 | 0.0152 | 0.0200 | 0.9098 | 0.5953 | 0.9484 | 0.0086 | 0.0000 | 0.0577 | 0.0103 | 0.0361 | 0.0095 | 0.0236 |
| EVI1_E47_R    | 0.1423 | 0.0553 | 0.5328 | 0.0331 | 0.7724 | 0.0411 | 0.6399 | 0.9812 | 0.6834 | 0.5361 | 0.8043 | 0.5007 | 0.5531 | 0.9583 | 0.0433 | 0.9865 |
| EVI1_P30_R    | 0.0064 | 0.0000 | 0.0093 | 0.3347 | 0.0096 | 0.0064 | 0.0050 | 0.0040 | 0.3509 | 0.0036 | 0.0000 | 0.0097 | 0.0047 | 0.0000 | 0.0048 | 0.0100 |
| EVI2A_P94_R   | 0.0126 | 0.0082 | 0.0098 | 0.0055 | 0.0027 | 0.0059 | 0.0000 | 0.0023 | 0.0000 | 0.0000 | 0.0000 | 0.0055 | 0.0078 | 0.6358 | 0.0000 | 0.0039 |
| EXT1_E197_F   | 0.2960 | 0.3301 | 0.6371 | 0.6858 | 0.3782 | 0.0142 | 0.5820 | 0.1185 | 0.0000 | 0.0136 | 0.4186 | 0.0138 | 0.0144 | 0.2559 | 0.3408 | 0.3374 |
| EYA4_E277_F   | 0.1552 | 0.0032 | 0.0108 | 0.0047 | 0.5002 | 0.0055 | 0.0377 | 0.0078 | 0.0000 | 0.1534 | 0.2833 | 0.0119 | 0.0058 | 0.7150 | 0.0050 | 0.0031 |
| EYA4_P508_F   | 0.0000 | 0.0000 | 0.0000 | 0.0000 | 0.9834 | 0.9838 | 0.4525 | 0.2997 | 0.0000 | 0.0000 | 0.0000 | 0.7142 | 0.0000 | 0.2291 | 0.9714 | 0.0026 |
| EYA4_P794_F   | 0.0000 | 0.0000 | 0.0000 | 0.0000 | 0.0000 | 0.0000 | 0.2594 | 0.0000 | 0.9868 | 0.0000 | 0.0000 | 0.0000 | 0.0000 | 0.6189 | 0.5068 | 0.7250 |
| F2R_P839_F    | 0.0000 | 0.0052 | 0.9849 | 0.9620 | 0.0000 | 0.0000 | 0.0000 | 0.8833 | 0.9838 | 0.0000 | 0.0000 | 0.9872 | 0.0000 | 0.9657 | 0.4916 | 0.0063 |
| F2R_P88_F     | 0.3688 | 0.0121 | 0.4614 | 0.9886 | 0.0091 | 0.9912 | 0.0043 | 0.7623 | 0.9902 | 0.0000 | 0.0083 | 0.0059 | 0.7087 | 0.5062 | 0.9696 | 0.0018 |
| FABP3_E113_F  | 0.0188 | 0.0131 | 0.0966 | 0.3664 | 0.3366 | 0.7322 | 0.0000 | 0.3199 | 0.4407 | 0.0000 | 0.0000 | 0.9897 | 0.0032 | 0.5844 | 0.5906 | 0.9887 |
| FABP3_P598_F  | 0.9919 | 0.9379 | 0.5479 | 0.2546 | 0.8104 | 0.9808 | 0.9888 | 0.3803 | 0.5676 | 0.3364 | 0.5425 | 0.8119 | 0.3066 | 0.6286 | 0.3835 | 0.7139 |
| FANCE_P356_R  | 0.2299 | 0.0777 | 0.0034 | 0.0000 | 0.0043 | 0.0000 | 0.9871 | 0.9672 | 0.0000 | 0.0000 | 0.0000 | 0.0000 | 0.0042 | 0.0000 | 0.4052 | 0.0018 |
| FANCF_P13_F   | 0.7097 | 0.9879 | 0.7409 | 0.6836 | 0.7853 | 0.6429 | 0.6297 | 0.7689 | 0.0000 | 0.6628 | 0.7314 | 0.0906 | 0.6647 | 0.2221 | 0.9619 | 0.5598 |
| FANCG_E207_R  | 0.9587 | 0.1525 | 0.1812 | 0.1293 | 0.2893 | 0.0368 | 0.1862 | 0.0505 | 0.0596 | 0.9634 | 0.1183 | 0.4317 | 0.1040 | 0.5233 | 0.2697 | 0.0554 |
| FAS_P322_R    | 0.3940 | 0.2512 | 0.0000 | 0.0086 | 0.8520 | 0.9897 | 0.0000 | 0.0167 | 0.0000 | 0.0000 | 0.4141 | 0.0170 | 0.5873 | 0.4929 | 0.7120 | 0.9874 |
| FASTK_P257_F  | 0.0872 | 0.0810 | 0.0897 | 0.0351 | 0.0366 | 0.0906 | 0.0960 | 0.0367 | 0.0107 | 0.0303 | 0.0229 | 0.7840 | 0.0989 | 0.0532 | 0.0558 | 0.0828 |

|               |        |        |        |        |        |        |        |        |        |        |        |        |        |        |        |        |
|---------------|--------|--------|--------|--------|--------|--------|--------|--------|--------|--------|--------|--------|--------|--------|--------|--------|
| FAT_P973_R    | 0.0043 | 0.0000 | 0.0153 | 0.9762 | 0.0000 | 0.0960 | 0.0087 | 0.2325 | 0.0000 | 0.0000 | 0.7301 | 0.2326 | 0.5439 | 0.0000 | 0.7873 | 0.0092 |
| FER_P581_F    | 0.9923 | 0.9949 | 0.4975 | 0.2675 | 0.2757 | 0.2735 | 0.0420 | 0.8731 | 0.9913 | 0.1603 | 0.2357 | 0.9018 | 0.2368 | 0.9668 | 0.7896 | 0.9025 |
| FES_P223_R    | 0.0000 | 0.9916 | 0.0000 | 0.0000 | 0.9764 | 0.9875 | 0.0000 | 0.9696 | 0.9887 | 0.0000 | 0.0000 | 0.0000 | 0.0000 | 0.9389 | 0.9569 | 0.9901 |
| FGF1_E5_F     | 0.9100 | 0.3057 | 0.0654 | 0.3085 | 0.8358 | 0.8745 | 0.9066 | 0.9242 | 0.9155 | 0.2832 | 0.3600 | 0.4630 | 0.3606 | 0.8722 | 0.9829 | 0.1650 |
| FGF12_E61_R   | 0.2450 | 0.8311 | 0.0209 | 0.5770 | 0.2813 | 0.5185 | 0.2374 | 0.0250 | 0.0000 | 0.3484 | 0.0078 | 0.0087 | 0.3423 | 0.0000 | 0.0397 | 0.0080 |
| FGF12_P210_R  | 0.3886 | 0.3796 | 0.9835 | 0.7039 | 0.0153 | 0.9921 | 0.9894 | 0.9327 | 0.9893 | 0.9848 | 0.3961 | 0.0788 | 0.9959 | 0.9027 | 0.9871 | 0.9883 |
| FGF2_P153_F   | 0.2905 | 0.1558 | 0.0403 | 0.0154 | 0.0533 | 0.2097 | 0.1568 | 0.0278 | 0.7735 | 0.9844 | 0.2664 | 0.1373 | 0.1503 | 0.0132 | 0.0987 | 0.0187 |
| FGF2_P229_F   | 0.5377 | 0.0518 | 0.5185 | 0.0407 | 0.0672 | 0.4264 | 0.0339 | 0.5905 | 0.0034 | 0.4412 | 0.5379 | 0.3655 | 0.0310 | 0.0771 | 0.0747 | 0.0480 |
| FGF3_E198_R   | 0.9921 | 0.9902 | 0.7581 | 0.9836 | 0.9910 | 0.9842 | 0.9862 | 0.9722 | 0.9837 | 0.9931 | 0.9938 | 0.5650 | 0.9889 | 0.9772 | 0.9670 | 0.9843 |
| FGF3_P171_R   | 0.0008 | 0.0048 | 0.7178 | 0.9102 | 0.5417 | 0.9914 | 0.5193 | 0.8926 | 0.7570 | 0.6529 | 0.0000 | 0.9355 | 0.9291 | 0.9022 | 0.9859 | 0.9039 |
| FGF5_E16_F    | 0.9767 | 0.8144 | 0.9833 | 0.9906 | 0.9872 | 0.0000 | 0.0000 | 0.9829 | 0.9852 | 0.0000 | 0.0000 | 0.0038 | 0.0000 | 0.9886 | 0.7322 | 0.9898 |
| FGF5_P238_R   | 0.0102 | 0.7066 | 0.7647 | 0.0000 | 0.0160 | 0.8858 | 0.0000 | 0.8792 | 0.0000 | 0.0099 | 0.0102 | 0.6678 | 0.0034 | 0.6465 | 0.5796 | 0.9259 |
| FGF6_E294_F   | 0.0924 | 0.7534 | 0.0504 | 0.0513 | 0.0814 | 0.7012 | 0.9901 | 0.0409 | 0.0000 | 0.0522 | 0.8179 | 0.9904 | 0.7739 | 0.0045 | 0.1860 | 0.7248 |
| FGF7_P44_F    | 0.0000 | 0.0000 | 0.0071 | 0.0000 | 0.0007 | 0.0023 | 0.0031 | 0.7259 | 0.0000 | 0.0000 | 0.0000 | 0.0023 | 0.0000 | 0.0000 | 0.0014 | 0.5595 |
| FGF8_E183_F   | 0.2339 | 0.2841 | 0.1169 | 0.2601 | 0.0054 | 0.0228 | 0.1289 | 0.0306 | 0.0000 | 0.0000 | 0.0709 | 0.1549 | 0.1112 | 0.0000 | 0.9216 | 0.0494 |
| FGF8_P473_F   | 0.0000 | 0.0003 | 0.0000 | 0.0000 | 0.0000 | 0.0000 | 0.0000 | 0.7961 | 0.0000 | 0.0000 | 0.0000 | 0.0000 | 0.0000 | 0.8172 | 0.0000 | 0.0556 |
| FGFR1_E317_F  | 0.0692 | 0.0155 | 0.0153 | 0.0093 | 0.0000 | 0.0153 | 0.1271 | 0.0178 | 0.0000 | 0.0000 | 0.2684 | 0.2677 | 0.0000 | 0.0000 | 0.0322 | 0.4877 |
| FGFR2_P266_R  | 0.1693 | 0.4403 | 0.0148 | 0.0094 | 0.0113 | 0.1873 | 0.0079 | 0.0130 | 0.0000 | 0.2944 | 0.1885 | 0.0055 | 0.2675 | 0.0000 | 0.0089 | 0.0069 |
| FGFR3_E297_R  | 0.0000 | 0.0000 | 0.9775 | 0.0000 | 0.0000 | 0.0000 | 0.0000 | 0.0072 | 0.9888 | 0.0000 | 0.0977 | 0.0000 | 0.0000 | 0.7644 | 0.9133 | 0.9855 |
| FGFR3_P1152_R | 0.0000 | 0.8071 | 0.7063 | 0.8125 | 0.6868 | 0.5871 | 0.9920 | 0.9075 | 0.6624 | 0.9950 | 0.7013 | 0.5426 | 0.9939 | 0.9249 | 0.9455 | 0.7480 |
| FHIT_E19_R    | 0.0164 | 0.0000 | 0.0000 | 0.7129 | 0.9842 | 0.9906 | 0.0000 | 0.9788 | 0.9894 | 0.0093 | 0.0000 | 0.9875 | 0.0000 | 0.8761 | 0.8604 | 0.0042 |
| FHIT_P93_R    | 0.0114 | 0.0000 | 0.0141 | 0.0062 | 0.0093 | 0.0065 | 0.0032 | 0.3610 | 0.9901 | 0.0000 | 0.0000 | 0.0050 | 0.0050 | 0.0000 | 0.0070 | 0.0000 |
| FHL1_E229_R   | 0.0000 | 0.0000 | 0.0000 | 0.0026 | 0.0000 | 0.0000 | 0.0018 | 0.0022 | 0.0000 | 0.0000 | 0.0051 | 0.0000 | 0.0000 | 0.0000 | 0.9808 | 0.4846 |
| FLI1_P620_R   | 0.0000 | 0.4947 | 0.0000 | 0.9855 | 0.0000 | 0.0356 | 0.0000 | 0.1785 | 0.0000 | 0.0000 | 0.9922 | 0.9804 | 0.2074 | 0.9018 | 0.2374 | 0.9852 |
| FLT1_E444_F   | 0.5960 | 0.0264 | 0.0348 | 0.9869 | 0.0730 | 0.5776 | 0.0148 | 0.5266 | 0.0000 | 0.8144 | 0.8372 | 0.0892 | 0.0321 | 0.5324 | 0.5687 | 0.9902 |
| FLT1_P302_F   | 0.0581 | 0.0265 | 0.4970 | 0.3938 | 0.0412 | 0.0281 | 0.1384 | 0.0465 | 0.0000 | 0.2821 | 0.0184 | 0.0264 | 0.2789 | 0.0088 | 0.0558 | 0.0302 |
| FLT1_P615_R   | 0.1352 | 0.0968 | 0.0232 | 0.0084 | 0.0168 | 0.9922 | 0.0967 | 0.3822 | 0.0000 | 0.1462 | 0.1701 | 0.0112 | 0.1326 | 0.0000 | 0.0190 | 0.0860 |
| FLT3_E326_R   | 0.0135 | 0.0089 | 0.9857 | 0.0139 | 0.6233 | 0.0110 | 0.0114 | 0.0103 | 0.4318 | 0.0000 | 0.0115 | 0.1825 | 0.0068 | 0.2734 | 0.0041 | 0.0128 |
| FLT4_P180_R   | 0.0239 | 0.1528 | 0.9845 | 0.9902 | 0.9643 | 0.9913 | 0.9410 | 0.9690 | 0.9900 | 0.0235 | 0.0658 | 0.9465 | 0.9802 | 0.6167 | 0.9816 | 0.1396 |
| FMR1_P62_R    | 0.6087 | 0.9379 | 0.6828 | 0.9345 | 0.7033 | 0.4515 | 0.8859 | 0.8292 | 0.3925 | 0.9332 | 0.9246 | 0.4240 | 0.4567 | 0.4307 | 0.4201 | 0.5223 |
| FN1_E469_F    | 0.0083 | 0.0000 | 0.0072 | 0.0005 | 0.0032 | 0.0000 | 0.0043 | 0.3278 | 0.0000 | 0.0000 | 0.0000 | 0.0000 | 0.0017 | 0.0000 | 0.0000 | 0.0009 |
| FN1_P229_R    | 0.0088 | 0.0110 | 0.0413 | 0.0092 | 0.1375 | 0.0053 | 0.0167 | 0.0194 | 0.3654 | 0.2262 | 0.2961 | 0.0257 | 0.2855 | 0.0072 | 0.0296 | 0.0057 |
| FOSL2_E384_R  | 0.8051 | 0.9925 | 0.1844 | 0.0726 | 0.9851 | 0.9934 | 0.9925 | 0.9461 | 0.9851 | 0.0449 | 0.0000 | 0.8761 | 0.0723 | 0.9879 | 0.8634 | 0.9914 |

|                |        |        |        |        |        |        |        |        |        |        |        |        |        |        |        |        |
|----------------|--------|--------|--------|--------|--------|--------|--------|--------|--------|--------|--------|--------|--------|--------|--------|--------|
| FRK_P36_F      | 0.0167 | 0.1492 | 0.0456 | 0.7755 | 0.0095 | 0.1337 | 0.0767 | 0.0186 | 0.5666 | 0.0124 | 0.0000 | 0.0116 | 0.3353 | 0.0000 | 0.0086 | 0.1002 |
| FRZB_E186_R    | 0.0000 | 0.0115 | 0.0000 | 0.0000 | 0.0000 | 0.1215 | 0.0000 | 0.7519 | 0.8858 | 0.0000 | 0.0000 | 0.9814 | 0.1513 | 0.0000 | 0.9223 | 0.1011 |
| FRZB_P406_F    | 0.0099 | 0.0040 | 0.0000 | 0.0000 | 0.7203 | 0.0085 | 0.0000 | 0.0113 | 0.0000 | 0.0024 | 0.0000 | 0.0000 | 0.0000 | 0.0000 | 0.0023 | 0.0000 |
| FVT1_P225_F    | 0.0105 | 0.7965 | 0.0105 | 0.0124 | 0.0022 | 0.9837 | 0.0106 | 0.0000 | 0.0000 | 0.0388 | 0.0106 | 0.0912 | 0.9933 | 0.0000 | 0.0026 | 0.0000 |
| FYN_P352_R     | 0.9955 | 0.9948 | 0.9876 | 0.9323 | 0.9958 | 0.9937 | 0.9952 | 0.8723 | 0.9915 | 0.9948 | 0.9970 | 0.9927 | 0.9939 | 0.5848 | 0.9705 | 0.9922 |
| FZD7_E296_F    | 0.0424 | 0.9929 | 0.9870 | 0.0000 | 0.9803 | 0.0000 | 0.9865 | 0.8742 | 0.9802 | 0.0000 | 0.0000 | 0.9830 | 0.0000 | 0.9769 | 0.9784 | 0.0000 |
| FZD9_E458_F    | 0.0000 | 0.0000 | 0.9825 | 0.0000 | 0.0000 | 0.9900 | 0.0000 | 0.9703 | 0.9842 | 0.0000 | 0.9955 | 0.0000 | 0.9922 | 0.9720 | 0.9734 | 0.0000 |
| FZD9_P15_R     | 0.0544 | 0.0115 | 0.0068 | 0.0043 | 0.0000 | 0.0000 | 0.0049 | 0.0032 | 0.0000 | 0.6046 | 0.2128 | 0.0000 | 0.0000 | 0.0000 | 0.0000 | 0.0021 |
| FZD9_P175_F    | 0.0203 | 0.0397 | 0.8042 | 0.0106 | 0.0946 | 0.6277 | 0.0898 | 0.4392 | 0.0000 | 0.0127 | 0.1915 | 0.1498 | 0.1226 | 0.3038 | 0.7821 | 0.0095 |
| G6PD_E190_F    | 0.0000 | 0.0000 | 0.8999 | 0.0022 | 0.0000 | 0.0021 | 0.0008 | 0.0000 | 0.0000 | 0.0000 | 0.0000 | 0.0000 | 0.0000 | 0.0000 | 0.0408 | 0.0000 |
| G6PD_P196_F    | 0.7172 | 0.0108 | 0.7027 | 0.9923 | 0.2062 | 0.5333 | 0.9921 | 0.0214 | 0.0000 | 0.9834 | 0.6684 | 0.6106 | 0.6447 | 0.0000 | 0.0414 | 0.4499 |
| GABRB3_E42_F   | 0.1948 | 0.0000 | 0.0000 | 0.0000 | 0.0000 | 0.0000 | 0.0000 | 0.0033 | 0.0000 | 0.0029 | 0.0000 | 0.0053 | 0.0000 | 0.0000 | 0.2016 | 0.0851 |
| GADD45A_P737_R | 0.3571 | 0.4332 | 0.0310 | 0.0332 | 0.5445 | 0.0147 | 0.0207 | 0.0249 | 0.0000 | 0.4141 | 0.0349 | 0.0368 | 0.0258 | 0.0123 | 0.3903 | 0.0251 |
| GALR1_E52_F    | 0.0141 | 0.2883 | 0.0197 | 0.3111 | 0.3303 | 0.0140 | 0.0770 | 0.8389 | 0.0000 | 0.1340 | 0.0000 | 0.0106 | 0.0105 | 0.0000 | 0.0271 | 0.0000 |
| GALR1_P80_F    | 0.0276 | 0.0100 | 0.0102 | 0.0053 | 0.0357 | 0.0072 | 0.0000 | 0.0095 | 0.0000 | 0.0000 | 0.0000 | 0.3416 | 0.0517 | 0.0000 | 0.0201 | 0.0000 |
| GAS1_E22_F     | 0.1917 | 0.0087 | 0.0138 | 0.0126 | 0.0153 | 0.0580 | 0.0000 | 0.0102 | 0.0000 | 0.1495 | 0.0738 | 0.0062 | 0.0073 | 0.0000 | 0.0153 | 0.2018 |
| GAS1_P754_R    | 0.0000 | 0.0000 | 0.0000 | 0.0000 | 0.0000 | 0.0000 | 0.0018 | 0.0067 | 0.0000 | 0.0000 | 0.0000 | 0.0028 | 0.0027 | 0.0000 | 0.0000 | 0.0023 |
| GAS7_E148_F    | 0.0244 | 0.0204 | 0.0108 | 0.0180 | 0.0785 | 0.0135 | 0.4305 | 0.0112 | 0.0000 | 0.0401 | 0.0103 | 0.0208 | 0.0071 | 0.7612 | 0.0800 | 0.0076 |
| GAS7_P622_R    | 0.0105 | 0.0000 | 0.0000 | 0.0000 | 0.0000 | 0.0000 | 0.0000 | 0.0000 | 0.0000 | 0.0000 | 0.0000 | 0.0000 | 0.0000 | 0.0000 | 0.0000 | 0.0000 |
| GATA6_P21_R    | 0.0082 | 0.0088 | 0.1187 | 0.0012 | 0.0078 | 0.0000 | 0.0027 | 0.0047 | 0.0000 | 0.0000 | 0.0052 | 0.0070 | 0.0027 | 0.2699 | 0.0057 | 0.0021 |
| GATA6_P726_F   | 0.1177 | 0.2036 | 0.0331 | 0.5017 | 0.2956 | 0.4931 | 0.1776 | 0.0152 | 0.0000 | 0.3439 | 0.5340 | 0.0130 | 0.3187 | 0.0000 | 0.6669 | 0.3827 |
| GFI1_E136_F    | 0.2030 | 0.0000 | 0.0000 | 0.0854 | 0.0000 | 0.0056 | 0.1358 | 0.0096 | 0.0000 | 0.9943 | 0.0000 | 0.1782 | 0.0000 | 0.0000 | 0.0000 | 0.0913 |
| GFI1_P45_R     | 0.0091 | 0.0014 | 0.0068 | 0.0000 | 0.7253 | 0.0000 | 0.0041 | 0.0091 | 0.0000 | 0.0059 | 0.0115 | 0.0053 | 0.0083 | 0.0000 | 0.1587 | 0.0057 |
| GJB2_E43_F     | 0.2437 | 0.0000 | 0.0000 | 0.0000 | 0.0000 | 0.0000 | 0.0000 | 0.0116 | 0.0000 | 0.0043 | 0.0000 | 0.0000 | 0.0000 | 0.0000 | 0.0000 | 0.0056 |
| GJB2_P791_R    | 0.1926 | 0.0146 | 0.0146 | 0.0148 | 0.0277 | 0.6677 | 0.1382 | 0.0286 | 0.0000 | 0.0177 | 0.2199 | 0.0900 | 0.1581 | 0.0058 | 0.2118 | 0.0865 |
| GJB2_P931_R    | 0.3338 | 0.2931 | 0.3398 | 0.3545 | 0.3541 | 0.2736 | 0.2496 | 0.0422 | 0.0000 | 0.3082 | 0.0458 | 0.2960 | 0.3113 | 0.0250 | 0.0560 | 0.2771 |
| GLA_P112_F     | 0.4655 | 0.8945 | 0.6649 | 0.0379 | 0.0000 | 0.4134 | 0.8552 | 0.9837 | 0.0000 | 0.0097 | 0.0000 | 0.2003 | 0.3111 | 0.0000 | 0.0154 | 0.0207 |
| GLI2_E90_F     | 0.0000 | 0.0000 | 0.0000 | 0.9900 | 0.9654 | 0.0000 | 0.9890 | 0.9868 | 0.9860 | 0.0000 | 0.0000 | 0.9923 | 0.0000 | 0.9888 | 0.9845 | 0.9891 |
| GLI3_E148_R    | 0.9764 | 0.1369 | 0.0325 | 0.4370 | 0.9294 | 0.9923 | 0.8044 | 0.8458 | 0.7210 | 0.9791 | 0.9821 | 0.5262 | 0.0824 | 0.8635 | 0.9860 | 0.9836 |
| GML_P281_R     | 0.8755 | 0.0000 | 0.2198 | 0.9874 | 0.9891 | 0.0000 | 0.9908 | 0.9799 | 0.0000 | 0.9951 | 0.0000 | 0.0000 | 0.0000 | 0.6778 | 0.9746 | 0.0000 |
| GNAS_E58_F     | 0.0129 | 0.0159 | 0.6836 | 0.0000 | 0.0181 | 0.9719 | 0.0048 | 0.5785 | 0.0000 | 0.0070 | 0.0000 | 0.0038 | 0.0000 | 0.9860 | 0.9821 | 0.0008 |
| GP1BB_E23_F    | 0.0934 | 0.0074 | 0.0165 | 0.0090 | 0.0063 | 0.0097 | 0.0063 | 0.0106 | 0.0000 | 0.0088 | 0.0111 | 0.0060 | 0.0083 | 0.0631 | 0.0093 | 0.0069 |
| GPC3_P235_R    | 0.0000 | 0.0046 | 0.6465 | 0.0000 | 0.0000 | 0.0000 | 0.0000 | 0.0077 | 0.9865 | 0.9954 | 0.0000 | 0.0000 | 0.0000 | 0.0000 | 0.0021 | 0.0000 |

|                     |        |        |        |        |        |        |        |        |        |        |        |        |        |        |        |        |
|---------------------|--------|--------|--------|--------|--------|--------|--------|--------|--------|--------|--------|--------|--------|--------|--------|--------|
| GPR116_E328_R       | 0.9939 | 0.0000 | 0.9900 | 0.9918 | 0.9821 | 0.9928 | 0.0000 | 0.9553 | 0.9915 | 0.9916 | 0.9968 | 0.0000 | 0.9930 | 0.9906 | 0.9850 | 0.9919 |
| GPX1_E46_R          | 0.1820 | 0.0077 | 0.1028 | 0.0107 | 0.0068 | 0.1712 | 0.0000 | 0.0088 | 0.0000 | 0.0093 | 0.0000 | 0.0000 | 0.0038 | 0.0000 | 0.0837 | 0.0083 |
| GPX1_P194_F         | 0.6452 | 0.6829 | 0.7829 | 0.0356 | 0.1060 | 0.0302 | 0.4291 | 0.0268 | 0.0000 | 0.4273 | 0.6859 | 0.0417 | 0.5376 | 0.0022 | 0.0703 | 0.5725 |
| GPX3_E178_F         | 0.0099 | 0.0121 | 0.0167 | 0.0112 | 0.1023 | 0.0085 | 0.9773 | 0.7336 | 0.0000 | 0.1108 | 0.1628 | 0.0090 | 0.0135 | 0.0050 | 0.2079 | 0.0060 |
| GRB10_E85_R         | 0.0165 | 0.0151 | 0.0123 | 0.0101 | 0.0009 | 0.0053 | 0.0000 | 0.0096 | 0.0000 | 0.0102 | 0.0000 | 0.0000 | 0.0000 | 0.2954 | 0.0000 | 0.0000 |
| GRB10_P260_F        | 0.0098 | 0.0207 | 0.0071 | 0.0000 | 0.0065 | 0.0091 | 0.0600 | 0.0158 | 0.0000 | 0.0000 | 0.9896 | 0.0104 | 0.0040 | 0.0000 | 0.0000 | 0.0135 |
| GRB10_P496_R        | 0.0000 | 0.0186 | 0.0203 | 0.0071 | 0.4450 | 0.1766 | 0.2177 | 0.0074 | 0.0000 | 0.0097 | 0.0095 | 0.0891 | 0.1383 | 0.0000 | 0.0000 | 0.0225 |
| GRPR_P200_R         | 0.1330 | 0.1418 | 0.9852 | 0.9883 | 0.9391 | 0.0125 | 0.9742 | 0.9407 | 0.0429 | 0.3745 | 0.1989 | 0.9841 | 0.1751 | 0.5254 | 0.9682 | 0.1566 |
| GSTM1_P363_F        | 0.0000 | 0.0068 | 0.6525 | 0.1006 | 0.9860 | 0.0114 | 0.0087 | 0.6776 | 0.0000 | 0.0821 | 0.1258 | 0.0608 | 0.0118 | 0.0000 | 0.0217 | 0.0000 |
| GSTM2_E153_F        | 0.0092 | 0.0049 | 0.4823 | 0.0051 | 0.0060 | 0.0041 | 0.0000 | 0.0000 | 0.0000 | 0.0000 | 0.0000 | 0.0063 | 0.0049 | 0.0382 | 0.3059 | 0.0000 |
| GSTM2_P109_R        | 0.0087 | 0.0000 | 0.0069 | 0.0007 | 0.0000 | 0.0044 | 0.0000 | 0.0066 | 0.0000 | 0.0018 | 0.0088 | 0.0021 | 0.0000 | 0.0000 | 0.0000 | 0.0000 |
| GSTM2_P453_R        | 0.0000 | 0.0117 | 0.0128 | 0.0000 | 0.5224 | 0.0000 | 0.9872 | 0.9724 | 0.8663 | 0.9937 | 0.0000 | 0.0020 | 0.0000 | 0.8486 | 0.2160 | 0.0000 |
| GSTP1_E322_R        | 0.3909 | 0.0000 | 0.0118 | 0.0009 | 0.0000 | 0.1399 | 0.0000 | 0.0105 | 0.0000 | 0.0129 | 0.0825 | 0.0018 | 0.0060 | 0.7493 | 0.0000 | 0.0104 |
| GSTP1_P74_F         | 0.0320 | 0.0402 | 0.4472 | 0.5271 | 0.0211 | 0.0201 | 0.2103 | 0.0258 | 0.0000 | 0.0222 | 0.1297 | 0.3259 | 0.1615 | 0.0000 | 0.0502 | 0.0275 |
| GSTP1_seq_38_S153_R | 0.0000 | 0.0143 | 0.0165 | 0.0048 | 0.0111 | 0.0086 | 0.0000 | 0.0105 | 0.0000 | 0.0000 | 0.0000 | 0.0000 | 0.0092 | 0.0000 | 0.0047 | 0.0000 |
| GUCY2D_E419_R       | 0.0092 | 0.0056 | 0.0000 | 0.0054 | 0.0046 | 0.0000 | 0.0066 | 0.4420 | 0.0000 | 0.0000 | 0.0000 | 0.0000 | 0.0049 | 0.0000 | 0.0032 | 0.0000 |
| HBEGF_P32_R         | 0.0000 | 0.0000 | 0.0042 | 0.0000 | 0.0000 | 0.0019 | 0.0052 | 0.0046 | 0.0000 | 0.0000 | 0.0000 | 0.0000 | 0.0000 | 0.0000 | 0.0001 | 0.0044 |
| HBII-13_E48_F       | 0.0000 | 0.0000 | 0.0000 | 0.9776 | 0.0000 | 0.9890 | 0.0030 | 0.8648 | 0.0000 | 0.0000 | 0.0000 | 0.0000 | 0.0000 | 0.9622 | 0.9805 | 0.9857 |
| HBII-52_P563_F      | 0.0572 | 0.7240 | 0.1340 | 0.7464 | 0.0498 | 0.0441 | 0.0384 | 0.9800 | 0.9838 | 0.6051 | 0.6524 | 0.8522 | 0.6314 | 0.6400 | 0.1533 | 0.4479 |
| HCK_P46_R           | 0.0134 | 0.0000 | 0.1119 | 0.0084 | 0.0000 | 0.2822 | 0.3112 | 0.0172 | 0.0000 | 0.0088 | 0.0000 | 0.0207 | 0.0040 | 0.0000 | 0.0074 | 0.0078 |
| HCK_P858_F          | 0.0733 | 0.6071 | 0.0677 | 0.0278 | 0.1014 | 0.5806 | 0.5100 | 0.0167 | 0.0000 | 0.4959 | 0.0638 | 0.0399 | 0.0761 | 0.0000 | 0.0665 | 0.0487 |
| HDAC1_P414_R        | 0.0128 | 0.0000 | 0.0108 | 0.0038 | 0.4367 | 0.0105 | 0.0109 | 0.0044 | 0.9883 | 0.0098 | 0.0103 | 0.0000 | 0.0115 | 0.2614 | 0.0000 | 0.0053 |
| HDAC11_P556_F       | 0.0000 | 0.0000 | 0.0000 | 0.0000 | 0.0048 | 0.0062 | 0.0000 | 0.0035 | 0.0000 | 0.0000 | 0.0147 | 0.0060 | 0.0000 | 0.0000 | 0.0000 | 0.0000 |
| HDAC9_P137_R        | 0.7570 | 0.0013 | 0.0001 | 0.0000 | 0.0000 | 0.0000 | 0.0024 | 0.0014 | 0.0000 | 0.0000 | 0.0000 | 0.0011 | 0.0025 | 0.1382 | 0.0015 | 0.0029 |
| HFE_E273_R          | 0.0089 | 0.0091 | 0.0045 | 0.0034 | 0.0051 | 0.0028 | 0.0048 | 0.0030 | 0.0000 | 0.0103 | 0.0130 | 0.0000 | 0.0062 | 0.0000 | 0.0003 | 0.0000 |
| HHIP_P307_R         | 0.1760 | 0.1047 | 0.1315 | 0.0266 | 0.2886 | 0.0241 | 0.0334 | 0.0379 | 0.0003 | 0.0212 | 0.1159 | 0.0245 | 0.1811 | 0.0129 | 0.0313 | 0.1034 |
| HIC1_E151_F         | 0.0000 | 0.0000 | 0.0000 | 0.0000 | 0.3268 | 0.0000 | 0.0000 | 0.0000 | 0.0000 | 0.0000 | 0.0000 | 0.0000 | 0.0016 | 0.0000 | 0.0000 | 0.0000 |
| HIC1_P565_R         | 0.0000 | 0.0000 | 0.0124 | 0.0220 | 0.0000 | 0.0000 | 0.0000 | 0.1319 | 0.0000 | 0.0000 | 0.0000 | 0.0123 | 0.0000 | 0.0000 | 0.0089 | 0.0037 |
| HIC2_P498_F         | 0.0000 | 0.0077 | 0.0000 | 0.0046 | 0.0000 | 0.0000 | 0.0000 | 0.0054 | 0.0000 | 0.0036 | 0.9383 | 0.0000 | 0.0081 | 0.0000 | 0.0000 | 0.0059 |
| HIC2_P528_R         | 0.0181 | 0.0000 | 0.0132 | 0.0113 | 0.0000 | 0.0055 | 0.0107 | 0.0000 | 0.0000 | 0.0205 | 0.0236 | 0.0000 | 0.0199 | 0.0000 | 0.0056 | 0.0093 |
| HIF1A_P488_F        | 0.0000 | 0.0000 | 0.0000 | 0.7994 | 0.0000 | 0.0102 | 0.0000 | 0.0113 | 0.0000 | 0.0102 | 0.0000 | 0.0046 | 0.0042 | 0.0000 | 0.0000 | 0.0038 |
| HLA-DOB_P357_R      | 0.9909 | 0.4957 | 0.0000 | 0.9857 | 0.8106 | 0.9893 | 0.9822 | 0.9833 | 0.0000 | 0.9935 | 0.0000 | 0.0000 | 0.9927 | 0.9743 | 0.9696 | 0.9862 |
| HLA-DPA1_P205_R     | 0.0197 | 0.0117 | 0.0220 | 0.8415 | 0.6860 | 0.0056 | 0.1128 | 0.0150 | 0.1205 | 0.0105 | 0.1295 | 0.1081 | 0.0880 | 0.0000 | 0.6018 | 0.0070 |

|                 |        |        |        |        |        |        |        |        |        |        |        |        |        |        |        |        |
|-----------------|--------|--------|--------|--------|--------|--------|--------|--------|--------|--------|--------|--------|--------|--------|--------|--------|
| HLA-DPA1_P28_R  | 0.0000 | 0.0000 | 0.0121 | 0.0068 | 0.0121 | 0.0076 | 0.0049 | 0.0032 | 0.0000 | 0.0000 | 0.0000 | 0.0047 | 0.0000 | 0.0000 | 0.0080 | 0.0041 |
| HLA-DPB1_E2_R   | 0.0000 | 0.0000 | 0.1182 | 0.0146 | 0.0547 | 0.1711 | 0.5683 | 0.0225 | 0.0000 | 0.0000 | 0.5647 | 0.0364 | 0.4274 | 0.0000 | 0.1256 | 0.4377 |
| HLA-DRA_P132_R  | 0.0013 | 0.0000 | 0.0000 | 0.0000 | 0.0000 | 0.0000 | 0.0000 | 0.3911 | 0.0000 | 0.0000 | 0.0000 | 0.8425 | 0.0000 | 0.0000 | 0.0000 | 0.0000 |
| HLA-F_E402_F    | 0.0096 | 0.0000 | 0.0000 | 0.0000 | 0.0000 | 0.0000 | 0.0006 | 0.0000 | 0.0000 | 0.0000 | 0.0000 | 0.0000 | 0.0000 | 0.0000 | 0.0000 | 0.0000 |
| HLF_E192_F      | 0.0443 | 0.0255 | 0.0772 | 0.0234 | 0.5573 | 0.7527 | 0.0224 | 0.0217 | 0.0000 | 0.6635 | 0.7068 | 0.5911 | 0.0288 | 0.0080 | 0.0329 | 0.0140 |
| HOXA11_E35_F    | 0.0116 | 0.0053 | 0.0000 | 0.0047 | 0.0044 | 0.0052 | 0.0035 | 0.0045 | 0.0000 | 0.0040 | 0.0000 | 0.0065 | 0.0000 | 0.0000 | 0.0000 | 0.0046 |
| HOXA11_P698_F   | 0.6991 | 0.0411 | 0.0589 | 0.0138 | 0.0253 | 0.0226 | 0.5934 | 0.0337 | 0.0000 | 0.7792 | 0.7138 | 0.0247 | 0.0210 | 0.0000 | 0.7809 | 0.5808 |
| HOXA5_E187_F    | 0.0000 | 0.0000 | 0.9898 | 0.0000 | 0.6539 | 0.0055 | 0.0000 | 0.9493 | 0.9657 | 0.0074 | 0.9960 | 0.9901 | 0.0032 | 0.9496 | 0.0000 | 0.9897 |
| HOXA9_E252_R    | 0.0134 | 0.1088 | 0.0499 | 0.0289 | 0.0644 | 0.0000 | 0.0000 | 0.0155 | 0.0000 | 0.0000 | 0.0000 | 0.0074 | 0.0000 | 0.0000 | 0.1425 | 0.0000 |
| HOXA9_P1141_R   | 0.1402 | 0.0144 | 0.0293 | 0.0247 | 0.0225 | 0.2351 | 0.0087 | 0.0202 | 0.0000 | 0.1148 | 0.0138 | 0.0142 | 0.0118 | 0.0099 | 0.0247 | 0.0215 |
| HOXA9_P303_F    | 0.0000 | 0.0000 | 0.0015 | 0.0000 | 0.0000 | 0.0000 | 0.0000 | 0.0016 | 0.0000 | 0.0000 | 0.0000 | 0.0003 | 0.0006 | 0.0000 | 0.0000 | 0.0011 |
| HOXB13_E21_F    | 0.0000 | 0.0048 | 0.0086 | 0.0030 | 0.0086 | 0.0000 | 0.0000 | 0.1059 | 0.0000 | 0.0057 | 0.0000 | 0.0042 | 0.0033 | 0.0000 | 0.3076 | 0.0000 |
| HOXB13_P17_R    | 0.0000 | 0.0045 | 0.0032 | 0.0004 | 0.0000 | 0.0041 | 0.0000 | 0.0003 | 0.0000 | 0.0000 | 0.0000 | 0.0035 | 0.0000 | 0.0000 | 0.5104 | 0.0000 |
| HOXC6_P456_R    | 0.5429 | 0.0464 | 0.0469 | 0.0481 | 0.6846 | 0.7242 | 0.0273 | 0.0369 | 0.0000 | 0.6471 | 0.0357 | 0.0410 | 0.0212 | 0.0310 | 0.0512 | 0.0248 |
| HPN_P374_R      | 0.0000 | 0.0000 | 0.0224 | 0.0000 | 0.0187 | 0.0069 | 0.0000 | 0.0045 | 0.0000 | 0.0000 | 0.0000 | 0.0000 | 0.0000 | 0.0000 | 0.0000 | 0.0055 |
| HPN_P823_F      | 0.0164 | 0.0415 | 0.7097 | 0.0000 | 0.0000 | 0.0007 | 0.0034 | 0.9755 | 0.0000 | 0.0000 | 0.0000 | 0.0000 | 0.0029 | 0.0000 | 0.6812 | 0.0000 |
| HPSE_P29_F      | 0.0344 | 0.0380 | 0.6687 | 0.0199 | 0.0215 | 0.7404 | 0.0817 | 0.0365 | 0.0000 | 0.5620 | 0.5901 | 0.4180 | 0.9907 | 0.4775 | 0.0226 | 0.7253 |
| HPSE_P93_F      | 0.0000 | 0.0062 | 0.0098 | 0.0058 | 0.0000 | 0.0053 | 0.0083 | 0.0065 | 0.0000 | 0.0484 | 0.0082 | 0.0067 | 0.0000 | 0.0000 | 0.0000 | 0.0042 |
| HRASLS_E72_R    | 0.0000 | 0.0000 | 0.0027 | 0.0000 | 0.0000 | 0.0000 | 0.0000 | 0.0019 | 0.0000 | 0.0037 | 0.0000 | 0.0023 | 0.0000 | 0.0000 | 0.0000 | 0.0000 |
| HS3ST2_E145_R   | 0.0000 | 0.0038 | 0.9790 | 0.0000 | 0.0000 | 0.0000 | 0.0000 | 0.0041 | 0.0000 | 0.0000 | 0.0000 | 0.0000 | 0.0000 | 0.0000 | 0.0000 | 0.0000 |
| HS3ST2_P546_F   | 0.0137 | 0.0000 | 0.0000 | 0.0000 | 0.0000 | 0.0074 | 0.0064 | 0.0000 | 0.0000 | 0.0000 | 0.0000 | 0.0000 | 0.0000 | 0.0000 | 0.0000 | 0.0106 |
| HSD17B12_E145_R | 0.0412 | 0.4414 | 0.0177 | 0.0177 | 0.0249 | 0.0085 | 0.0163 | 0.0172 | 0.0000 | 0.0000 | 0.0000 | 0.0772 | 0.0231 | 0.0000 | 0.0176 | 0.0072 |
| HTR1B_P222_F    | 0.0000 | 0.0000 | 0.0000 | 0.0034 | 0.0000 | 0.0000 | 0.0022 | 0.0000 | 0.0000 | 0.1648 | 0.0000 | 0.0000 | 0.0045 | 0.0000 | 0.0006 | 0.0000 |
| HTR2A_P853_F    | 0.0159 | 0.0105 | 0.0000 | 0.0029 | 0.0072 | 0.0000 | 0.0028 | 0.0040 | 0.0000 | 0.9938 | 0.0112 | 0.0046 | 0.0060 | 0.0000 | 0.0000 | 0.0035 |
| IAPP_E280_F     | 0.0000 | 0.0000 | 0.9863 | 0.9874 | 0.0000 | 0.9641 | 0.0000 | 0.9825 | 0.9876 | 0.0000 | 0.0000 | 0.9897 | 0.9946 | 0.9652 | 0.9845 | 0.0000 |
| ICA1_P61_F      | 0.0000 | 0.0160 | 0.0000 | 0.0000 | 0.0000 | 0.0027 | 0.0000 | 0.0000 | 0.0000 | 0.0191 | 0.0000 | 0.0000 | 0.0000 | 0.0000 | 0.0000 | 0.0000 |
| ICA1_P72_R      | 0.0000 | 0.0064 | 0.0000 | 0.0000 | 0.0021 | 0.0000 | 0.3631 | 0.0000 | 0.0000 | 0.0000 | 0.0000 | 0.0000 | 0.0000 | 0.2559 | 0.0000 | 0.0026 |
| ICAM1_E242_F    | 0.2109 | 0.0104 | 0.7295 | 0.0144 | 0.0097 | 0.0090 | 0.1512 | 0.0149 | 0.0000 | 0.2995 | 0.1926 | 0.0119 | 0.7663 | 0.0000 | 0.0198 | 0.0067 |
| ICAM1_P119_R    | 0.0000 | 0.0109 | 0.0000 | 0.0041 | 0.0000 | 0.0000 | 0.0046 | 0.0020 | 0.0000 | 0.0052 | 0.0000 | 0.0013 | 0.0061 | 0.0000 | 0.0000 | 0.0000 |
| ICAM1_P386_R    | 0.0176 | 0.0073 | 0.0205 | 0.0000 | 0.0067 | 0.0000 | 0.0015 | 0.0000 | 0.0000 | 0.0000 | 0.0000 | 0.0061 | 0.0000 | 0.0000 | 0.0000 | 0.0000 |
| ID1_P659_R      | 0.0000 | 0.0000 | 0.0064 | 0.0016 | 0.0000 | 0.0046 | 0.0000 | 0.6697 | 0.0000 | 0.0000 | 0.0090 | 0.0024 | 0.0000 | 0.0000 | 0.0023 | 0.0000 |
| IFNG_P459_R     | 0.6841 | 0.2396 | 0.4673 | 0.9883 | 0.9843 | 0.0089 | 0.0106 | 0.6383 | 0.0000 | 0.2673 | 0.1511 | 0.9912 | 0.1883 | 0.7816 | 0.9810 | 0.9918 |
| IFNGR1_P307_F   | 0.1493 | 0.0127 | 0.0181 | 0.0086 | 0.1294 | 0.0098 | 0.1426 | 0.0145 | 0.0000 | 0.1410 | 0.1615 | 0.0116 | 0.1711 | 0.0000 | 0.0087 | 0.0082 |

|                |        |        |        |        |        |        |        |        |        |        |        |        |        |        |        |        |
|----------------|--------|--------|--------|--------|--------|--------|--------|--------|--------|--------|--------|--------|--------|--------|--------|--------|
| IFNGR2_E164_F  | 0.1001 | 0.0235 | 0.0896 | 0.1162 | 0.0644 | 0.1231 | 0.1142 | 0.0389 | 0.0000 | 0.0311 | 0.0186 | 0.0491 | 0.0406 | 0.0190 | 0.0379 | 0.0244 |
| IFNGR2_P377_R  | 0.0078 | 0.0000 | 0.0036 | 0.0000 | 0.0008 | 0.0000 | 0.0014 | 0.0000 | 0.0000 | 0.0000 | 0.0000 | 0.0025 | 0.0000 | 0.0000 | 0.0000 | 0.9905 |
| IGF1_E394_F    | 0.0000 | 0.0021 | 0.9874 | 0.9627 | 0.9815 | 0.0000 | 0.0000 | 0.6405 | 0.6338 | 0.0005 | 0.0000 | 0.0000 | 0.0000 | 0.8403 | 0.0000 | 0.0000 |
| IGF1_P933_F    | 0.2549 | 0.3603 | 0.0407 | 0.9843 | 0.9831 | 0.0053 | 0.0000 | 0.9766 | 0.0000 | 0.0000 | 0.0040 | 0.0000 | 0.0039 | 0.7210 | 0.0000 | 0.0000 |
| IGF1R_E186_R   | 0.0000 | 0.0072 | 0.0000 | 0.0000 | 0.0000 | 0.0000 | 0.0000 | 0.0017 | 0.0000 | 0.0046 | 0.0000 | 0.0013 | 0.0000 | 0.0000 | 0.0000 | 0.0000 |
| IGF1R_P325_R   | 0.5276 | 0.1721 | 0.0207 | 0.0142 | 0.5844 | 0.2329 | 0.0094 | 0.4055 | 0.0000 | 0.4096 | 0.6756 | 0.4977 | 0.4259 | 0.0000 | 0.0353 | 0.3817 |
| IGF2_E134_R    | 0.0000 | 0.0000 | 0.0005 | 0.0000 | 0.0000 | 0.0000 | 0.0000 | 0.0019 | 0.0000 | 0.0000 | 0.0021 | 0.0000 | 0.0000 | 0.0000 | 0.0000 | 0.0000 |
| IGF2_P1036_R   | 0.0195 | 0.0182 | 0.0252 | 0.2056 | 0.0250 | 0.0158 | 0.0132 | 0.0474 | 0.0000 | 0.0110 | 0.1929 | 0.0210 | 0.1469 | 0.1673 | 0.0166 | 0.0552 |
| IGF2_P36_R     | 0.0000 | 0.0000 | 0.0000 | 0.0138 | 0.0322 | 0.1168 | 0.0532 | 0.0110 | 0.0000 | 0.1521 | 0.0000 | 0.0707 | 0.2908 | 0.0000 | 0.0148 | 0.0074 |
| IGF2AS_P203_F  | 0.0000 | 0.0000 | 0.0000 | 0.0000 | 0.0000 | 0.0000 | 0.0000 | 0.0000 | 0.0000 | 0.0000 | 0.0000 | 0.0000 | 0.0000 | 0.0000 | 0.0000 | 0.0000 |
| IGF2R_P396_R   | 0.2782 | 0.8727 | 0.2728 | 0.9752 | 0.8011 | 0.9776 | 0.8206 | 0.6602 | 0.2163 | 0.2587 | 0.9511 | 0.2546 | 0.9497 | 0.4025 | 0.1879 | 0.2306 |
| IGFBP1_E48_R   | 0.0784 | 0.0088 | 0.0233 | 0.2553 | 0.0842 | 0.0000 | 0.0070 | 0.0095 | 0.9398 | 0.0056 | 0.0000 | 0.0076 | 0.0000 | 0.0000 | 0.0556 | 0.0070 |
| IGFBP1_P12_R   | 0.0149 | 0.2912 | 0.3762 | 0.0989 | 0.0202 | 0.1629 | 0.0000 | 0.0479 | 0.0000 | 0.3567 | 0.0122 | 0.0103 | 0.2244 | 0.0000 | 0.0091 | 0.1029 |
| IGFBP2_P306_F  | 0.0097 | 0.0000 | 0.0060 | 0.0000 | 0.0000 | 0.0000 | 0.0005 | 0.0000 | 0.0000 | 0.0018 | 0.0053 | 0.0000 | 0.0066 | 0.0000 | 0.0000 | 0.0000 |
| IGFBP3_E65_R   | 0.0170 | 0.5855 | 0.3725 | 0.3342 | 0.0236 | 0.0332 | 0.3524 | 0.0442 | 0.0000 | 0.2754 | 0.1447 | 0.0336 | 0.0051 | 0.0000 | 0.0409 | 0.3504 |
| IGFBP3_P1035_F | 0.0000 | 0.0000 | 0.0033 | 0.0000 | 0.0000 | 0.0000 | 0.0000 | 0.0032 | 0.0000 | 0.0000 | 0.0000 | 0.0000 | 0.0000 | 0.0000 | 0.0000 | 0.0021 |
| IGFBP3_P423_R  | 0.0080 | 0.0953 | 0.0109 | 0.0070 | 0.0847 | 0.1713 | 0.1286 | 0.0158 | 0.0000 | 0.0958 | 0.0077 | 0.0057 | 0.1769 | 0.0000 | 0.0139 | 0.0203 |
| IGFBP7_P371_F  | 0.0131 | 0.2824 | 0.0225 | 0.0043 | 0.0137 | 0.1676 | 0.2840 | 0.1563 | 0.0000 | 0.0058 | 0.1735 | 0.0074 | 0.1464 | 0.0000 | 0.0108 | 0.0000 |
| IGSF4_P454_F   | 0.2631 | 0.0090 | 0.0177 | 0.0000 | 0.0062 | 0.0000 | 0.0016 | 0.0098 | 0.0000 | 0.0000 | 0.0000 | 0.0000 | 0.0092 | 0.0000 | 0.0000 | 0.0032 |
| IGSF4_P86_R    | 0.1674 | 0.0127 | 0.5838 | 0.0202 | 0.0487 | 0.3574 | 0.1342 | 0.0165 | 0.0000 | 0.9865 | 0.1321 | 0.1850 | 0.5289 | 0.0083 | 0.0152 | 0.0094 |
| IGSF4C_E65_F   | 0.0000 | 0.9956 | 0.6245 | 0.6929 | 0.7694 | 0.0035 | 0.0034 | 0.9875 | 0.0000 | 0.9954 | 0.0000 | 0.0000 | 0.0000 | 0.4265 | 0.9857 | 0.9929 |
| IGSF4C_P533_R  | 0.0169 | 0.0000 | 0.0147 | 0.0000 | 0.0024 | 0.0000 | 0.0088 | 0.0140 | 0.0000 | 0.0477 | 0.0122 | 0.0000 | 0.0000 | 0.0000 | 0.2070 | 0.0074 |
| IHH_E186_F     | 0.0000 | 0.0000 | 0.0000 | 0.0000 | 0.0000 | 0.0000 | 0.0000 | 0.0000 | 0.0000 | 0.0036 | 0.0959 | 0.0074 | 0.0000 | 0.0000 | 0.0000 | 0.0020 |
| IHH_P246_R     | 0.0000 | 0.0041 | 0.9796 | 0.0000 | 0.0093 | 0.3693 | 0.0084 | 0.0093 | 0.0000 | 0.0134 | 0.0000 | 0.0150 | 0.0026 | 0.0000 | 0.0105 | 0.2555 |
| IHH_P529_F     | 0.0000 | 0.1566 | 0.0000 | 0.0000 | 0.0094 | 0.0066 | 0.0000 | 0.0095 | 0.0000 | 0.0000 | 0.0000 | 0.0000 | 0.0000 | 0.0000 | 0.0000 | 0.0724 |
| IL10_P85_F     | 0.0000 | 0.0000 | 0.0065 | 0.9868 | 0.0007 | 0.0000 | 0.0031 | 0.0033 | 0.0000 | 0.0000 | 0.0000 | 0.0000 | 0.0000 | 0.0000 | 0.5894 | 0.0000 |
| IL11_P11_R     | 0.0000 | 0.8885 | 0.0000 | 0.0000 | 0.0000 | 0.0000 | 0.0000 | 0.0079 | 0.0000 | 0.0000 | 0.0000 | 0.0087 | 0.0000 | 0.6727 | 0.0000 | 0.0000 |
| IL12A_E287_R   | 0.0110 | 0.0046 | 0.0062 | 0.0035 | 0.0035 | 0.0033 | 0.0001 | 0.0043 | 0.0000 | 0.0000 | 0.0000 | 0.0015 | 0.0164 | 0.0000 | 0.0435 | 0.0027 |
| IL12B_P392_R   | 0.3054 | 0.0040 | 0.0010 | 0.0003 | 0.0374 | 0.0021 | 0.0816 | 0.4927 | 0.0000 | 0.0036 | 0.0050 | 0.0014 | 0.0255 | 0.4495 | 0.6656 | 0.2651 |
| IL13_E75_R     | 0.9924 | 0.9933 | 0.9020 | 0.9881 | 0.9907 | 0.8535 | 0.0415 | 0.9822 | 0.8214 | 0.2449 | 0.6654 | 0.9367 | 0.7933 | 0.9899 | 0.9850 | 0.0909 |
| IL17RB_E164_R  | 0.0000 | 0.0048 | 0.0000 | 0.0039 | 0.0000 | 0.0000 | 0.0112 | 0.0040 | 0.0000 | 0.0109 | 0.0000 | 0.0063 | 0.0092 | 0.0000 | 0.0000 | 0.0030 |
| IL17RB_P788_R  | 0.0000 | 0.0000 | 0.0000 | 0.0000 | 0.0000 | 0.0000 | 0.0000 | 0.0005 | 0.0000 | 0.0000 | 0.0000 | 0.0000 | 0.0051 | 0.0000 | 0.0000 | 0.0000 |
| IL18BP_P51_R   | 0.2996 | 0.0309 | 0.0446 | 0.0427 | 0.0737 | 0.0150 | 0.2402 | 0.0483 | 0.0000 | 0.2285 | 0.2807 | 0.0259 | 0.1382 | 0.0163 | 0.0469 | 0.0173 |

|               |        |        |        |        |        |        |        |        |        |        |        |        |        |        |        |        |
|---------------|--------|--------|--------|--------|--------|--------|--------|--------|--------|--------|--------|--------|--------|--------|--------|--------|
| IL1A_E113_R   | 0.9941 | 0.9928 | 0.9518 | 0.9902 | 0.9916 | 0.9923 | 0.9938 | 0.9445 | 0.9091 | 0.0000 | 0.3153 | 0.0685 | 0.1198 | 0.9882 | 0.9886 | 0.6805 |
| IL1RN_E42_F   | 0.0000 | 0.0000 | 0.0000 | 0.0000 | 0.0000 | 0.0000 | 0.5674 | 0.9884 | 0.8846 | 0.0001 | 0.0000 | 0.6980 | 0.7033 | 0.9705 | 0.9206 | 0.6557 |
| IL3_P556_F    | 0.9947 | 0.0000 | 0.8322 | 0.0005 | 0.0000 | 0.9921 | 0.0017 | 0.9845 | 0.9887 | 0.9951 | 0.0000 | 0.0000 | 0.0000 | 0.9842 | 0.9825 | 0.9898 |
| IL6_E168_F    | 0.3226 | 0.0104 | 0.0235 | 0.0000 | 0.2535 | 0.1606 | 0.0000 | 0.0126 | 0.0000 | 0.3462 | 0.2782 | 0.0596 | 0.1906 | 0.0000 | 0.0150 | 0.0052 |
| IL8_E118_R    | 0.0061 | 0.0079 | 0.0088 | 0.0033 | 0.0000 | 0.0000 | 0.0000 | 0.0031 | 0.0000 | 0.0000 | 0.0000 | 0.0055 | 0.0527 | 0.0000 | 0.4328 | 0.0012 |
| IL8_P83_F     | 0.0069 | 0.1513 | 0.0000 | 0.0000 | 0.8920 | 0.0000 | 0.0000 | 0.0000 | 0.0000 | 0.0000 | 0.0000 | 0.0000 | 0.0000 | 0.0000 | 0.0000 | 0.0000 |
| IMPACT_P186_F | 0.0000 | 0.0000 | 0.0000 | 0.0000 | 0.0000 | 0.0000 | 0.0000 | 0.0000 | 0.0000 | 0.0130 | 0.0000 | 0.0000 | 0.0000 | 0.0000 | 0.0000 | 0.0000 |
| IMPACT_P234_R | 0.0000 | 0.0000 | 0.0066 | 0.0000 | 0.0000 | 0.0000 | 0.0003 | 0.0059 | 0.0000 | 0.0025 | 0.0000 | 0.0000 | 0.0000 | 0.0000 | 0.0000 | 0.0000 |
| INSR_P1063_R  | 0.0000 | 0.0000 | 0.0000 | 0.0000 | 0.0000 | 0.0000 | 0.0023 | 0.0000 | 0.0000 | 0.0000 | 0.0000 | 0.0000 | 0.0000 | 0.0000 | 0.0000 | 0.0000 |
| IPF1_P234_F   | 0.0000 | 0.0000 | 0.0102 | 0.0000 | 0.0224 | 0.0000 | 0.0000 | 0.0054 | 0.0000 | 0.0000 | 0.0000 | 0.0000 | 0.0000 | 0.0000 | 0.0000 | 0.0040 |
| IRAK1_P455_R  | 0.0137 | 0.7643 | 0.0114 | 0.0045 | 0.0003 | 0.0000 | 0.0106 | 0.0314 | 0.0000 | 0.0187 | 0.1279 | 0.0000 | 0.0051 | 0.0000 | 0.0068 | 0.0838 |
| IRAK3_E130_F  | 0.0229 | 0.0068 | 0.0127 | 0.0031 | 0.0048 | 0.0000 | 0.0120 | 0.0099 | 0.0000 | 0.0047 | 0.0000 | 0.0003 | 0.0000 | 0.0000 | 0.0045 | 0.9869 |
| IRAK3_P13_F   | 0.0000 | 0.2633 | 0.0000 | 0.0149 | 0.0000 | 0.0071 | 0.0150 | 0.0141 | 0.0000 | 0.1576 | 0.0000 | 0.0111 | 0.0105 | 0.0000 | 0.0093 | 0.0025 |
| IRF5_P123_F   | 0.0152 | 0.0080 | 0.0204 | 0.0147 | 0.0066 | 0.0000 | 0.4981 | 0.0162 | 0.0000 | 0.0166 | 0.0094 | 0.0128 | 0.0028 | 0.3243 | 0.0159 | 0.0025 |
| IRF7_P277_R   | 0.0273 | 0.1919 | 0.0264 | 0.0160 | 0.0212 | 0.0158 | 0.2100 | 0.0129 | 0.0000 | 0.3062 | 0.2132 | 0.0143 | 0.0136 | 0.0000 | 0.0178 | 0.0134 |
| ISL1_E87_R    | 0.0000 | 0.0058 | 0.0135 | 0.0029 | 0.0021 | 0.0044 | 0.0000 | 0.0078 | 0.0000 | 0.0059 | 0.0103 | 0.0078 | 0.9929 | 0.0000 | 0.0000 | 0.0061 |
| ISL1_P379_F   | 0.0000 | 0.0279 | 0.0119 | 0.0037 | 0.0072 | 0.0000 | 0.0023 | 0.0072 | 0.3996 | 0.0000 | 0.0095 | 0.0072 | 0.0000 | 0.0000 | 0.0023 | 0.0041 |
| ISL1_P554_F   | 0.0000 | 0.0053 | 0.0030 | 0.0000 | 0.0000 | 0.0000 | 0.0000 | 0.0000 | 0.0000 | 0.0000 | 0.0032 | 0.0000 | 0.0000 | 0.0000 | 0.0000 | 0.0000 |
| ITGA2_E120_F  | 0.0136 | 0.0067 | 0.0152 | 0.0106 | 0.0054 | 0.0100 | 0.0110 | 0.0122 | 0.0000 | 0.3747 | 0.0000 | 0.0163 | 0.1312 | 0.0000 | 0.3820 | 0.0000 |
| ITGA2_P26_R   | 0.0000 | 0.0071 | 0.0000 | 0.0000 | 0.0037 | 0.0050 | 0.0044 | 0.0046 | 0.0000 | 0.0000 | 0.0146 | 0.0000 | 0.0050 | 0.0000 | 0.0000 | 0.0027 |
| ITGB4_E144_F  | 0.0215 | 0.0115 | 0.0108 | 0.0086 | 0.0000 | 0.0000 | 0.0000 | 0.0107 | 0.0000 | 0.0175 | 0.0000 | 0.0000 | 0.0000 | 0.0000 | 0.0029 | 0.0000 |
| ITGB4_P517_F  | 0.0054 | 0.0000 | 0.0132 | 0.0000 | 0.0000 | 0.0000 | 0.0000 | 0.0056 | 0.9587 | 0.0000 | 0.0000 | 0.0000 | 0.0000 | 0.0000 | 0.0000 | 0.0000 |
| ITPR3_E86_R   | 0.0875 | 0.0000 | 0.0011 | 0.0000 | 0.0000 | 0.0000 | 0.0000 | 0.0021 | 0.0000 | 0.0000 | 0.0085 | 0.0000 | 0.0011 | 0.0000 | 0.0000 | 0.0050 |
| ITPR3_P1112_F | 0.0084 | 0.0053 | 0.0000 | 0.0017 | 0.0000 | 0.0038 | 0.0000 | 0.0002 | 0.0000 | 0.0000 | 0.0000 | 0.0000 | 0.0036 | 0.0000 | 0.0000 | 0.0021 |
| JAG2_E54_F    | 0.0000 | 0.0058 | 0.0097 | 0.0000 | 0.0055 | 0.0234 | 0.0047 | 0.0078 | 0.0000 | 0.0000 | 0.0000 | 0.0078 | 0.0632 | 0.0000 | 0.0032 | 0.1179 |
| JAG2_P264_F   | 0.0114 | 0.0044 | 0.3804 | 0.5022 | 0.0158 | 0.4521 | 0.2655 | 0.3719 | 0.0000 | 0.0000 | 0.0000 | 0.1999 | 0.0502 | 0.0000 | 0.0100 | 0.0062 |
| JAK2_P772_R   | 0.0189 | 0.0139 | 0.2208 | 0.0831 | 0.0138 | 0.0000 | 0.0000 | 0.0129 | 0.0000 | 0.0000 | 0.0000 | 0.0204 | 0.0000 | 0.0000 | 0.0025 | 0.2798 |
| JAK3_E64_F    | 0.0000 | 0.0119 | 0.0130 | 0.0041 | 0.0125 | 0.0046 | 0.0026 | 0.0107 | 0.0000 | 0.0094 | 0.0000 | 0.0081 | 0.0000 | 0.0000 | 0.3086 | 0.0079 |
| JAK3_P156_R   | 0.0933 | 0.1367 | 0.0208 | 0.0101 | 0.0205 | 0.0079 | 0.0142 | 0.0143 | 0.0000 | 0.0105 | 0.0120 | 0.0106 | 0.1581 | 0.0012 | 0.0153 | 0.0081 |
| JUNB_P1149_R  | 0.1268 | 0.5337 | 0.5564 | 0.0787 | 0.2296 | 0.4813 | 0.4966 | 0.0633 | 0.0355 | 0.5461 | 0.6164 | 0.4780 | 0.0803 | 0.1554 | 0.1747 | 0.4531 |
| KCNK4_E3_F    | 0.0149 | 0.0000 | 0.0053 | 0.0037 | 0.0000 | 0.0000 | 0.0027 | 0.0093 | 0.0000 | 0.0000 | 0.0000 | 0.0000 | 0.0047 | 0.0000 | 0.5064 | 0.0046 |
| KDR_E79_F     | 0.7809 | 0.0471 | 0.0717 | 0.0206 | 0.0897 | 0.7332 | 0.5941 | 0.0185 | 0.0000 | 0.0385 | 0.0501 | 0.7887 | 0.0334 | 0.0000 | 0.7197 | 0.0326 |
| KDR_P445_R    | 0.1875 | 0.0000 | 0.0080 | 0.0000 | 0.0000 | 0.0043 | 0.2445 | 0.0116 | 0.0000 | 0.0000 | 0.0000 | 0.0074 | 0.0000 | 0.0332 | 0.0004 | 0.0041 |

|                 |        |        |        |        |        |        |        |        |        |        |        |        |        |        |        |        |
|-----------------|--------|--------|--------|--------|--------|--------|--------|--------|--------|--------|--------|--------|--------|--------|--------|--------|
| KIAA1804_P689_R | 0.0230 | 0.0096 | 0.2659 | 0.3038 | 0.0095 | 0.4218 | 0.1014 | 0.0185 | 0.0000 | 0.1411 | 0.0873 | 0.0098 | 0.1684 | 0.0000 | 0.0084 | 0.1380 |
| KIT_P367_R      | 0.2305 | 0.0024 | 0.0127 | 0.0000 | 0.0037 | 0.0050 | 0.0079 | 0.0100 | 0.0000 | 0.0059 | 0.5167 | 0.0000 | 0.0000 | 0.0000 | 0.0000 | 0.0029 |
| KIT_P405_F      | 0.0122 | 0.0063 | 0.3440 | 0.0000 | 0.0636 | 0.0073 | 0.0064 | 0.2836 | 0.0000 | 0.0068 | 0.0000 | 0.0080 | 0.0000 | 0.0000 | 0.0056 | 0.0042 |
| KLF5_E190_R     | 0.9954 | 0.0058 | 0.0140 | 0.0020 | 0.0073 | 0.0000 | 0.0039 | 0.4932 | 0.0510 | 0.0042 | 0.0000 | 0.0030 | 0.0000 | 0.0000 | 0.0034 | 0.0000 |
| KLK11_P103_R    | 0.9934 | 0.0000 | 0.9815 | 0.0000 | 0.0000 | 0.0000 | 0.9896 | 0.4846 | 0.0000 | 0.9835 | 0.0000 | 0.9891 | 0.0000 | 0.7791 | 0.9793 | 0.0000 |
| KLK11_P1290_F   | 0.9933 | 0.1601 | 0.0074 | 0.0955 | 0.0000 | 0.0000 | 0.0000 | 0.0204 | 0.0000 | 0.0000 | 0.9943 | 0.0000 | 0.0000 | 0.9717 | 0.7223 | 0.0000 |
| KRAS_E82_F      | 0.0113 | 0.0085 | 0.6765 | 0.8642 | 0.0025 | 0.9890 | 0.0068 | 0.6516 | 0.0000 | 0.9944 | 0.0120 | 0.7305 | 0.4340 | 0.8457 | 0.5373 | 0.0042 |
| KRAS_P651_F     | 0.5212 | 0.1590 | 0.5481 | 0.0814 | 0.5770 | 0.1049 | 0.1145 | 0.1272 | 0.0997 | 0.1657 | 0.5132 | 0.4900 | 0.1515 | 0.1063 | 0.1655 | 0.1130 |
| KRT13_P341_R    | 0.9939 | 0.0000 | 0.0082 | 0.0000 | 0.9824 | 0.0039 | 0.0027 | 0.9845 | 0.9914 | 0.0000 | 0.0000 | 0.0032 | 0.0000 | 0.7066 | 0.9850 | 0.9917 |
| KRT5_P308_F     | 0.1864 | 0.1992 | 0.3643 | 0.8933 | 0.5119 | 0.2562 | 0.9475 | 0.6812 | 0.9586 | 0.2184 | 0.2337 | 0.9233 | 0.2396 | 0.7616 | 0.7854 | 0.0845 |
| L1CAM_P148_R    | 0.0000 | 0.0072 | 0.8214 | 0.0101 | 0.0000 | 0.0054 | 0.0000 | 0.0074 | 0.0000 | 0.0000 | 0.0114 | 0.0135 | 0.0000 | 0.0000 | 0.1968 | 0.0043 |
| L1CAM_P19_F     | 0.0000 | 0.0000 | 0.1808 | 0.7497 | 0.0878 | 0.0000 | 0.0000 | 0.0075 | 0.0000 | 0.0000 | 0.0000 | 0.7082 | 0.0000 | 0.0000 | 0.1064 | 0.0094 |
| LAMC1_E466_R    | 0.0108 | 0.0000 | 0.0093 | 0.0452 | 0.0043 | 0.0674 | 0.0000 | 0.0106 | 0.0000 | 0.1865 | 0.1465 | 0.0126 | 0.0074 | 0.3359 | 0.0025 | 0.0000 |
| LIF_E208_F      | 0.0091 | 0.0000 | 0.0126 | 0.0117 | 0.0127 | 0.2299 | 0.0127 | 0.0168 | 0.0000 | 0.0000 | 0.0000 | 0.0134 | 0.1238 | 0.0000 | 0.0016 | 0.1513 |
| LIF_P383_R      | 0.0122 | 0.4364 | 0.9837 | 0.0000 | 0.4906 | 0.0000 | 0.0000 | 0.0000 | 0.0000 | 0.0000 | 0.0000 | 0.0000 | 0.0000 | 0.0038 | 0.0077 | 0.0000 |
| LIG4_P194_F     | 0.0000 | 0.1857 | 0.0128 | 0.0000 | 0.0000 | 0.0000 | 0.0000 | 0.0101 | 0.0000 | 0.0000 | 0.0000 | 0.0000 | 0.2382 | 0.0000 | 0.0062 | 0.0055 |
| LMO1_E265_R     | 0.0000 | 0.0000 | 0.0026 | 0.0000 | 0.0000 | 0.0000 | 0.0068 | 0.0035 | 0.0000 | 0.0000 | 0.0000 | 0.0000 | 0.0000 | 0.0000 | 0.0000 | 0.0029 |
| LMO1_P169_F     | 0.0000 | 0.0000 | 0.0107 | 0.0000 | 0.0041 | 0.0000 | 0.8524 | 0.0076 | 0.0000 | 0.0000 | 0.0000 | 0.0049 | 0.0000 | 0.0000 | 0.0063 | 0.0010 |
| LOX_P313_R      | 0.0727 | 0.0101 | 0.2367 | 0.1606 | 0.0247 | 0.1644 | 0.0129 | 0.0134 | 0.0000 | 0.0659 | 0.0999 | 0.0141 | 0.0091 | 0.0000 | 0.0208 | 0.0175 |
| LOX_P71_F       | 0.0134 | 0.0000 | 0.0093 | 0.0000 | 0.0052 | 0.0000 | 0.0042 | 0.0056 | 0.0000 | 0.0000 | 0.0000 | 0.0037 | 0.0056 | 0.0000 | 0.0000 | 0.0049 |
| LRP2_E20_F      | 0.5679 | 0.5034 | 0.5208 | 0.0470 | 0.0632 | 0.2463 | 0.6496 | 0.0880 | 0.6370 | 0.4703 | 0.5064 | 0.0525 | 0.0289 | 0.0257 | 0.0476 | 0.0358 |
| LRRC32_P865_R   | 0.0855 | 0.0078 | 0.0164 | 0.0000 | 0.0116 | 0.0000 | 0.0033 | 0.0000 | 0.0000 | 0.0000 | 0.0000 | 0.0098 | 0.0000 | 0.0000 | 0.0012 | 0.0044 |
| LTB4R_E64_R     | 0.4791 | 0.2776 | 0.0614 | 0.0268 | 0.0967 | 0.0216 | 0.3443 | 0.0219 | 0.0000 | 0.0402 | 0.7147 | 0.0508 | 0.5628 | 0.0000 | 0.0302 | 0.5314 |
| LYN_E353_F      | 0.0000 | 0.0000 | 0.0074 | 0.0000 | 0.9785 | 0.0065 | 0.0000 | 0.0000 | 0.0000 | 0.0000 | 0.0000 | 0.0000 | 0.0000 | 0.0000 | 0.0000 | 0.0000 |
| LYN_P241_F      | 0.3063 | 0.3643 | 0.1378 | 0.0851 | 0.2508 | 0.0422 | 0.0707 | 0.0619 | 0.0000 | 0.0684 | 0.0603 | 0.6218 | 0.3718 | 0.0344 | 0.0490 | 0.0154 |
| MAF_P826_R      | 0.0080 | 0.0000 | 0.0000 | 0.0000 | 0.0000 | 0.0000 | 0.0000 | 0.0000 | 0.0000 | 0.0000 | 0.0000 | 0.0033 | 0.0000 | 0.0000 | 0.0005 | 0.0000 |
| MAGEC3_P903_F   | 0.0000 | 0.0000 | 0.9797 | 0.0000 | 0.0046 | 0.0071 | 0.0000 | 0.0000 | 0.0000 | 0.0000 | 0.0000 | 0.0000 | 0.0000 | 0.0000 | 0.3851 | 0.0000 |
| MAGEL2_E166_R   | 0.0310 | 0.0000 | 0.0000 | 0.0000 | 0.0000 | 0.0000 | 0.0000 | 0.0000 | 0.0000 | 0.0000 | 0.0000 | 0.0066 | 0.9909 | 0.0000 | 0.0000 | 0.0000 |
| MALT1_P406_R    | 0.0108 | 0.0000 | 0.0000 | 0.0000 | 0.0000 | 0.0036 | 0.0037 | 0.0007 | 0.0000 | 0.0000 | 0.0000 | 0.0063 | 0.0000 | 0.0000 | 0.0000 | 0.0074 |
| MAP2K6_E297_F   | 0.0000 | 0.0014 | 0.0044 | 0.0017 | 0.0000 | 0.0018 | 0.0000 | 0.0031 | 0.0000 | 0.0000 | 0.0000 | 0.0014 | 0.0000 | 0.0000 | 0.0000 | 0.0000 |
| MAP2K6_P297_R   | 0.0172 | 0.0167 | 0.0246 | 0.0117 | 0.1917 | 0.0119 | 0.0172 | 0.3145 | 0.0000 | 0.0134 | 0.1012 | 0.1314 | 0.4578 | 0.0090 | 0.0145 | 0.0413 |
| MAP3K1_P7_F     | 0.0381 | 0.0238 | 0.0262 | 0.0288 | 0.0367 | 0.0138 | 0.6577 | 0.0228 | 0.0143 | 0.3486 | 0.8287 | 0.1443 | 0.4598 | 0.0267 | 0.0707 | 0.0159 |
| MAP3K9_E17_R    | 0.0161 | 0.6025 | 0.5165 | 0.1775 | 0.0153 | 0.0000 | 0.0000 | 0.3477 | 0.0000 | 0.3997 | 0.0000 | 0.0120 | 0.4759 | 0.0000 | 0.3717 | 0.4625 |



|                    |        |        |        |        |        |        |        |        |        |        |        |        |        |        |        |        |
|--------------------|--------|--------|--------|--------|--------|--------|--------|--------|--------|--------|--------|--------|--------|--------|--------|--------|
| MAPK12_E165_R      | 0.0160 | 0.0057 | 0.0108 | 0.0079 | 0.0023 | 0.0057 | 0.0072 | 0.0121 | 0.1681 | 0.0000 | 0.0000 | 0.0067 | 0.0040 | 0.0000 | 0.0057 | 0.0152 |
| MAPK12_P416_F      | 0.0000 | 0.0000 | 0.0000 | 0.0000 | 0.0000 | 0.0000 | 0.0000 | 0.0053 | 0.0000 | 0.0000 | 0.0000 | 0.0011 | 0.0000 | 0.0000 | 0.0000 | 0.0000 |
| MAPK14_P327_R      | 0.0125 | 0.2584 | 0.0572 | 0.0000 | 0.6203 | 0.0288 | 0.0015 | 0.0042 | 0.4610 | 0.0732 | 0.0000 | 0.0067 | 0.0042 | 0.0000 | 0.0000 | 0.7628 |
| MAPK4_E273_R       | 0.0084 | 0.0036 | 0.0057 | 0.9880 | 0.9556 | 0.8803 | 0.9920 | 0.3013 | 0.9587 | 0.0000 | 0.9926 | 0.0038 | 0.9937 | 0.6991 | 0.9706 | 0.7098 |
| MAPK9_P1175_F      | 0.9961 | 0.0000 | 0.0000 | 0.0000 | 0.0000 | 0.0074 | 0.0000 | 0.9847 | 0.9832 | 0.0000 | 0.0000 | 0.0000 | 0.0000 | 0.9712 | 0.5376 | 0.9928 |
| MAS1_P469_R        | 0.7788 | 0.5944 | 0.6637 | 0.6627 | 0.0868 | 0.2755 | 0.2809 | 0.9217 | 0.9763 | 0.4751 | 0.1660 | 0.8029 | 0.2365 | 0.9352 | 0.9830 | 0.2813 |
| MATK_P64_F         | 0.0160 | 0.0764 | 0.0140 | 0.0099 | 0.0113 | 0.0074 | 0.0501 | 0.0083 | 0.0000 | 0.0076 | 0.0478 | 0.0089 | 0.0930 | 0.0000 | 0.0064 | 0.0052 |
| MC2R_P1025_F       | 0.0000 | 0.0000 | 0.0000 | 0.0000 | 0.9762 | 0.0000 | 0.0000 | 0.9700 | 0.0000 | 0.0000 | 0.0138 | 0.0000 | 0.0000 | 0.6613 | 0.0000 | 0.0000 |
| MCAM_P169_R        | 0.0069 | 0.0052 | 0.0143 | 0.0066 | 0.8072 | 0.0076 | 0.0000 | 0.0132 | 0.0000 | 0.0000 | 0.0000 | 0.0143 | 0.0000 | 0.0000 | 0.0061 | 0.0000 |
| MCAM_P265_R        | 0.0155 | 0.0091 | 0.0273 | 0.0905 | 0.0116 | 0.0081 | 0.0489 | 0.0206 | 0.0000 | 0.0242 | 0.1148 | 0.0092 | 0.0816 | 0.0010 | 0.7221 | 0.0193 |
| MCC_P196_R         | 0.0000 | 0.0034 | 0.0000 | 0.0000 | 0.0000 | 0.0000 | 0.0000 | 0.0000 | 0.0000 | 0.0000 | 0.0000 | 0.0000 | 0.0010 | 0.0000 | 0.0000 | 0.0000 |
| MCM2_P241_R        | 0.0347 | 0.1255 | 0.0179 | 0.0084 | 0.0092 | 0.0074 | 0.0073 | 0.0100 | 0.0000 | 0.0131 | 0.0122 | 0.0133 | 0.0120 | 0.2002 | 0.0070 | 0.0087 |
| MDR1_seq_42_S300_R | 0.0198 | 0.0465 | 0.0132 | 0.0081 | 0.0115 | 0.0064 | 0.0189 | 0.0120 | 0.0000 | 0.0264 | 0.0112 | 0.0268 | 0.0085 | 0.0000 | 0.0024 | 0.0063 |
| MDS1_E45_F         | 0.2619 | 0.0094 | 0.0204 | 0.0051 | 0.0010 | 0.0091 | 0.0156 | 0.0092 | 0.0000 | 0.0000 | 0.0119 | 0.0000 | 0.0571 | 0.0000 | 0.0045 | 0.0032 |
| MECP2_E90_R        | 0.0000 | 0.0026 | 0.0056 | 0.1878 | 0.0125 | 0.0000 | 0.0092 | 0.0120 | 0.2995 | 0.0000 | 0.0138 | 0.0067 | 0.0174 | 0.0000 | 0.0065 | 0.0061 |
| MEG3_E91_F         | 0.0080 | 0.0025 | 0.0000 | 0.0026 | 0.0000 | 0.0000 | 0.0013 | 0.0000 | 0.0000 | 0.0000 | 0.0000 | 0.0000 | 0.0000 | 0.0000 | 0.0000 | 0.0000 |
| MEST_E150_F        | 0.0000 | 0.0000 | 0.0000 | 0.0000 | 0.0000 | 0.0000 | 0.0000 | 0.0023 | 0.5387 | 0.0000 | 0.0000 | 0.0000 | 0.0000 | 0.0000 | 0.0000 | 0.0000 |
| MEST_P4_F          | 0.0003 | 0.0000 | 0.0000 | 0.0000 | 0.0000 | 0.0000 | 0.0009 | 0.0035 | 0.0000 | 0.0025 | 0.0020 | 0.0024 | 0.0000 | 0.0000 | 0.0000 | 0.0049 |
| MEST_P62_R         | 0.0069 | 0.0000 | 0.0000 | 0.0000 | 0.0000 | 0.0006 | 0.0020 | 0.0000 | 0.0000 | 0.0000 | 0.0000 | 0.0000 | 0.0034 | 0.1340 | 0.0000 | 0.0000 |
| MET_E333_F         | 0.0964 | 0.0143 | 0.2793 | 0.0000 | 0.0158 | 0.8460 | 0.6780 | 0.8705 | 0.0000 | 0.1566 | 0.0000 | 0.0527 | 0.0144 | 0.0000 | 0.7439 | 0.0118 |
| MFAP4_P197_F       | 0.0344 | 0.0000 | 0.0063 | 0.0000 | 0.0033 | 0.0000 | 0.0011 | 0.0087 | 0.0000 | 0.0133 | 0.0000 | 0.0052 | 0.0000 | 0.0000 | 0.7956 | 0.0000 |
| MGMT_P272_R        | 0.0000 | 0.0000 | 0.0000 | 0.0000 | 0.0000 | 0.0000 | 0.0000 | 0.0034 | 0.0000 | 0.0000 | 0.0000 | 0.0055 | 0.0038 | 0.0000 | 0.0175 | 0.0000 |
| MGMT_P281_F        | 0.0303 | 0.5992 | 0.0212 | 0.0219 | 0.0318 | 0.4459 | 0.9916 | 0.3410 | 0.0000 | 0.5717 | 0.0222 | 0.0178 | 0.0115 | 0.0034 | 0.0311 | 0.2936 |
| MKRN3_P108_F       | 0.2946 | 0.9883 | 0.9804 | 0.8571 | 0.0000 | 0.9838 | 0.9825 | 0.9827 | 0.0000 | 0.9916 | 0.0000 | 0.0000 | 0.0000 | 0.9731 | 0.9743 | 0.0000 |
| MLF1_P97_F         | 0.9957 | 0.9949 | 0.0106 | 0.0000 | 0.0111 | 0.0058 | 0.0000 | 0.0057 | 0.0000 | 0.0734 | 0.0067 | 0.0071 | 0.0312 | 0.0000 | 0.0005 | 0.0000 |
| MLH1_P381_F        | 0.0172 | 0.0061 | 0.0020 | 0.0127 | 0.0063 | 0.0067 | 0.0345 | 0.0090 | 0.0000 | 0.5265 | 0.0000 | 0.0071 | 0.0000 | 0.0000 | 0.0097 | 0.0032 |
| MLH3_E72_F         | 0.0000 | 0.0127 | 0.0046 | 0.0025 | 0.0000 | 0.0000 | 0.0055 | 0.0057 | 0.0000 | 0.0000 | 0.0000 | 0.0076 | 0.0096 | 0.0000 | 0.0000 | 0.0000 |
| MLH3_P25_F         | 0.4395 | 0.0000 | 0.0069 | 0.0000 | 0.0041 | 0.0041 | 0.0000 | 0.3697 | 0.0000 | 0.1319 | 0.0069 | 0.9913 | 0.0027 | 0.0000 | 0.0054 | 0.7041 |
| MLLT3_E93_R        | 0.0153 | 0.0000 | 0.0119 | 0.0043 | 0.0000 | 0.0000 | 0.0044 | 0.0000 | 0.0000 | 0.0105 | 0.0093 | 0.0001 | 0.0034 | 0.0000 | 0.0000 | 0.0000 |
| MLLT4_P1400_F      | 0.0273 | 0.1542 | 0.0272 | 0.0238 | 0.0187 | 0.2131 | 0.1586 | 0.0252 | 0.0000 | 0.0141 | 0.1881 | 0.0191 | 0.2099 | 0.0005 | 0.0378 | 0.0141 |
| MLLT6_P957_F       | 0.0000 | 0.0053 | 0.0087 | 0.0000 | 0.0073 | 0.0042 | 0.0043 | 0.0024 | 0.0000 | 0.0000 | 0.0000 | 0.0000 | 0.0000 | 0.3467 | 0.3936 | 0.0038 |
| MME_E29_F          | 0.0242 | 0.0115 | 0.0163 | 0.0000 | 0.0000 | 0.0083 | 0.0000 | 0.0052 | 0.0000 | 0.0000 | 0.0000 | 0.0000 | 0.0000 | 0.0000 | 0.0096 | 0.0009 |
| MME_P388_F         | 0.0000 | 0.0176 | 0.0119 | 0.0000 | 0.0000 | 0.0000 | 0.0075 | 0.0000 | 0.0000 | 0.0105 | 0.0000 | 0.0000 | 0.0000 | 0.0000 | 0.0000 | 0.0000 |

|              |        |        |        |        |        |        |        |        |        |        |        |        |        |        |        |        |
|--------------|--------|--------|--------|--------|--------|--------|--------|--------|--------|--------|--------|--------|--------|--------|--------|--------|
| MMP19_E274_R | 0.0000 | 0.0000 | 0.0090 | 0.9897 | 0.9839 | 0.0000 | 0.9096 | 0.8424 | 0.9865 | 0.0000 | 0.0099 | 0.9917 | 0.0000 | 0.9845 | 0.9787 | 0.9892 |
| MMP2_E21_R   | 0.0000 | 0.0000 | 0.0000 | 0.0000 | 0.0024 | 0.0068 | 0.0023 | 0.0061 | 0.0000 | 0.0060 | 0.0000 | 0.0000 | 0.0000 | 0.0000 | 0.0000 | 0.0000 |
| MMP2_P197_F  | 0.0173 | 0.0084 | 0.0168 | 0.0076 | 0.0095 | 0.0000 | 0.0043 | 0.0123 | 0.4057 | 0.0000 | 0.0000 | 0.0097 | 0.0000 | 0.0000 | 0.0046 | 0.0040 |
| MMP2_P303_R  | 0.0128 | 0.5041 | 0.3876 | 0.0079 | 0.0134 | 0.3854 | 0.0053 | 0.0136 | 0.0000 | 0.0053 | 0.2642 | 0.0087 | 0.0042 | 0.0000 | 0.0142 | 0.0063 |
| MMP3_P16_R   | 0.0000 | 0.0000 | 0.9747 | 0.9888 | 0.9857 | 0.9896 | 0.9877 | 0.9854 | 0.9876 | 0.0000 | 0.0053 | 0.0000 | 0.9940 | 0.9124 | 0.9796 | 0.9918 |
| MMP7_P613_F  | 0.1966 | 0.1019 | 0.2389 | 0.9852 | 0.0554 | 0.2815 | 0.9461 | 0.8840 | 0.9837 | 0.8789 | 0.1982 | 0.1188 | 0.0423 | 0.7540 | 0.9365 | 0.9449 |
| MMP9_P189_F  | 0.0197 | 0.0101 | 0.7941 | 0.0114 | 0.1210 | 0.0000 | 0.0071 | 0.0098 | 0.0000 | 0.0148 | 0.0000 | 0.0102 | 0.0000 | 0.0000 | 0.0160 | 0.0000 |
| MMP9_P237_R  | 0.0259 | 0.0104 | 0.0112 | 0.4537 | 0.0175 | 0.0057 | 0.0157 | 0.0082 | 0.0000 | 0.0057 | 0.0000 | 0.0054 | 0.0109 | 0.0000 | 0.0105 | 0.0070 |
| MOS_E60_R    | 0.0140 | 0.0083 | 0.0150 | 0.0138 | 0.0270 | 0.0063 | 0.0069 | 0.0095 | 0.0000 | 0.0565 | 0.0481 | 0.0068 | 0.0073 | 0.0000 | 0.3586 | 0.0000 |
| MPO_P883_R   | 0.0103 | 0.0048 | 0.0075 | 0.0017 | 0.0000 | 0.0058 | 0.0066 | 0.0050 | 0.0000 | 0.0000 | 0.0000 | 0.0054 | 0.0062 | 0.0000 | 0.0029 | 0.0039 |
| MSH3_E3_F    | 0.6280 | 0.0270 | 0.9190 | 0.9637 | 0.8663 | 0.0088 | 0.9778 | 0.8972 | 0.6689 | 0.0000 | 0.0247 | 0.8141 | 0.0000 | 0.8738 | 0.9866 | 0.9797 |
| MSH3_P13_R   | 0.0269 | 0.6290 | 0.5766 | 0.7396 | 0.0323 | 0.6971 | 0.8470 | 0.8376 | 0.5075 | 0.0207 | 0.5135 | 0.5467 | 0.6066 | 0.6099 | 0.7378 | 0.4508 |
| MST1R_P392_F | 0.0020 | 0.0000 | 0.0000 | 0.0002 | 0.0000 | 0.0000 | 0.0000 | 0.0004 | 0.0000 | 0.0000 | 0.0000 | 0.0000 | 0.0000 | 0.0000 | 0.0000 | 0.0000 |
| MT1A_E13_R   | 0.0204 | 0.0107 | 0.0113 | 0.2995 | 0.0147 | 0.1833 | 0.0062 | 0.0166 | 0.9846 | 0.2574 | 0.0119 | 0.0670 | 0.0098 | 0.0000 | 0.0113 | 0.0067 |
| MT1A_P49_R   | 0.0000 | 0.0000 | 0.0010 | 0.0000 | 0.0021 | 0.0000 | 0.0000 | 0.0000 | 0.0000 | 0.0000 | 0.0066 | 0.0000 | 0.0005 | 0.0000 | 0.0000 | 0.0003 |
| MTA1_P478_F  | 0.1537 | 0.1146 | 0.1538 | 0.0115 | 0.0207 | 0.0087 | 0.0867 | 0.0120 | 0.0000 | 0.1077 | 0.0541 | 0.9734 | 0.1534 | 0.5598 | 0.0193 | 0.0996 |
| MUC1_E18_R   | 0.0000 | 0.0000 | 0.0480 | 0.0000 | 0.9712 | 0.0000 | 0.0686 | 0.8833 | 0.8437 | 0.0000 | 0.0000 | 0.6700 | 0.1071 | 0.0000 | 0.0000 | 0.0166 |
| MUC1_P191_F  | 0.0000 | 0.0000 | 0.0000 | 0.0000 | 0.0007 | 0.0000 | 0.0063 | 0.0120 | 0.0000 | 0.0000 | 0.0000 | 0.0000 | 0.0000 | 0.0000 | 0.0038 | 0.0048 |
| MXI1_P75_R   | 0.0179 | 0.0051 | 0.0135 | 0.0070 | 0.0108 | 0.0050 | 0.0082 | 0.0069 | 0.0000 | 0.0095 | 0.0130 | 0.0064 | 0.0051 | 0.0000 | 0.0000 | 0.0065 |
| MYBL2_P211_F | 0.0125 | 0.0090 | 0.0260 | 0.0042 | 0.0129 | 0.0000 | 0.0000 | 0.0098 | 0.0000 | 0.0000 | 0.0161 | 0.0138 | 0.0089 | 0.0000 | 0.0000 | 0.0030 |
| MYCL1_P502_R | 0.0712 | 0.0106 | 0.0000 | 0.0041 | 0.0000 | 0.0000 | 0.9906 | 0.0000 | 0.0000 | 0.0000 | 0.0101 | 0.0075 | 0.0051 | 0.0000 | 0.0000 | 0.0065 |
| MYCN_E77_R   | 0.0173 | 0.0171 | 0.0139 | 0.0000 | 0.0297 | 0.0054 | 0.0109 | 0.0166 | 0.0000 | 0.0078 | 0.0488 | 0.0130 | 0.1783 | 0.0056 | 0.0087 | 0.0000 |
| MYCN_P464_R  | 0.0000 | 0.0029 | 0.0085 | 0.0000 | 0.0017 | 0.0052 | 0.0054 | 0.0083 | 0.0000 | 0.0000 | 0.0000 | 0.0102 | 0.0000 | 0.0000 | 0.0006 | 0.0055 |
| MYH11_P22_F  | 0.0000 | 0.8381 | 0.0504 | 0.0000 | 0.0084 | 0.0585 | 0.0070 | 0.0069 | 0.0000 | 0.1250 | 0.0417 | 0.0000 | 0.0035 | 0.0000 | 0.0064 | 0.0000 |
| MYH11_P236_R | 0.0082 | 0.0052 | 0.0000 | 0.0000 | 0.0000 | 0.0000 | 0.0000 | 0.0000 | 0.0000 | 0.0043 | 0.0000 | 0.0000 | 0.0000 | 0.0000 | 0.0000 | 0.0000 |
| MYLK_P469_R  | 0.4054 | 0.5404 | 0.0246 | 0.0393 | 0.0140 | 0.2355 | 0.0101 | 0.0138 | 0.0000 | 0.0172 | 0.4740 | 0.0104 | 0.0100 | 0.1578 | 0.1896 | 0.2491 |
| MYOD1_E156_F | 0.3418 | 0.0399 | 0.0077 | 0.0021 | 0.2115 | 0.0000 | 0.0033 | 0.0000 | 0.0000 | 0.0584 | 0.0000 | 0.0064 | 0.0000 | 0.0000 | 0.0000 | 0.0000 |
| MYOD1_P50_F  | 0.0013 | 0.0000 | 0.0000 | 0.0000 | 0.0000 | 0.0000 | 0.0000 | 0.0000 | 0.0000 | 0.0007 | 0.0000 | 0.0000 | 0.0000 | 0.0000 | 0.0000 | 0.0075 |
| NBL1_E205_R  | 0.9178 | 0.0705 | 0.7802 | 0.8431 | 0.9872 | 0.0539 | 0.9912 | 0.0364 | 0.7838 | 0.0634 | 0.9408 | 0.8651 | 0.9043 | 0.9710 | 0.9465 | 0.9910 |
| NBL1_P24_F   | 0.0000 | 0.0709 | 0.8894 | 0.0000 | 0.0000 | 0.9844 | 0.1867 | 0.9298 | 0.9755 | 0.0000 | 0.0000 | 0.1458 | 0.0694 | 0.6915 | 0.9307 | 0.1824 |
| NCL_P840_R   | 0.0000 | 0.0042 | 0.0065 | 0.0000 | 0.0000 | 0.0000 | 0.0021 | 0.0143 | 0.0000 | 0.4192 | 0.0081 | 0.0000 | 0.0000 | 0.0000 | 0.0083 | 0.0029 |
| NDN_P1110_F  | 0.0152 | 0.9586 | 0.8889 | 0.6562 | 0.6482 | 0.8873 | 0.9865 | 0.9844 | 0.9160 | 0.9923 | 0.0000 | 0.9865 | 0.0000 | 0.9594 | 0.9754 | 0.0000 |
| NEFL_E23_R   | 0.9958 | 0.9613 | 0.9947 | 0.9092 | 0.9959 | 0.9853 | 0.8266 | 0.6015 | 0.8978 | 0.9967 | 0.9975 | 0.8687 | 0.7036 | 0.5403 | 0.5692 | 0.6669 |

|                |        |        |        |        |        |        |        |        |        |        |        |        |        |        |        |        |
|----------------|--------|--------|--------|--------|--------|--------|--------|--------|--------|--------|--------|--------|--------|--------|--------|--------|
| NEFL_P209_R    | 0.0000 | 0.0000 | 0.0000 | 0.0000 | 0.0000 | 0.0064 | 0.0000 | 0.0000 | 0.0000 | 0.0042 | 0.0000 | 0.0000 | 0.0000 | 0.0000 | 0.0000 | 0.0038 |
| NEO1_P1067_F   | 0.0000 | 0.0017 | 0.0042 | 0.0000 | 0.0000 | 0.0000 | 0.0000 | 0.0000 | 0.0000 | 0.0000 | 0.0000 | 0.0000 | 0.0000 | 0.0000 | 0.0000 | 0.0000 |
| NES_P239_R     | 0.2763 | 0.0100 | 0.0189 | 0.0000 | 0.0000 | 0.0000 | 0.0073 | 0.0010 | 0.0000 | 0.0060 | 0.2230 | 0.0231 | 0.0014 | 0.0000 | 0.0000 | 0.0012 |
| NEU1_P745_F    | 0.0000 | 0.0050 | 0.0000 | 0.0000 | 0.0059 | 0.0000 | 0.0000 | 0.0058 | 0.0000 | 0.0000 | 0.0000 | 0.0055 | 0.0000 | 0.0000 | 0.0004 | 0.0000 |
| NFKB1_P336_R   | 0.2587 | 0.0154 | 0.0000 | 0.3108 | 0.0000 | 0.0261 | 0.0127 | 0.0000 | 0.0000 | 0.0155 | 0.0000 | 0.0152 | 0.0000 | 0.0000 | 0.0009 | 0.0000 |
| NFKB2_P709_R   | 0.2848 | 0.2295 | 0.2168 | 0.0280 | 0.0280 | 0.4749 | 0.0674 | 0.0359 | 0.0000 | 0.2710 | 0.1435 | 0.2482 | 0.0157 | 0.0059 | 0.0338 | 0.2420 |
| NGFB_E353_F    | 0.0000 | 0.0074 | 0.0092 | 0.9882 | 0.0016 | 0.0000 | 0.0030 | 0.0029 | 0.0000 | 0.0000 | 0.0000 | 0.0000 | 0.0000 | 0.0000 | 0.0000 | 0.0047 |
| NGFB_P13_F     | 0.0890 | 0.0157 | 0.0458 | 0.2369 | 0.0391 | 0.3783 | 0.0237 | 0.0774 | 0.0788 | 0.0135 | 0.3601 | 0.3546 | 0.0332 | 0.9734 | 0.1547 | 0.3656 |
| NGFR_E328_F    | 0.0000 | 0.0117 | 0.0059 | 0.0047 | 0.0000 | 0.1721 | 0.0000 | 0.0000 | 0.0000 | 0.0083 | 0.0093 | 0.0764 | 0.0000 | 0.9199 | 0.0000 | 0.0000 |
| NGFR_P355_F    | 0.3975 | 0.0710 | 0.1626 | 0.0846 | 0.3595 | 0.2770 | 0.3038 | 0.0937 | 0.0322 | 0.3682 | 0.3569 | 0.0892 | 0.0736 | 0.8594 | 0.6539 | 0.2553 |
| NKX3-1_P146_F  | 0.0134 | 0.0000 | 0.0147 | 0.0000 | 0.0207 | 0.0078 | 0.0058 | 0.0086 | 0.0000 | 0.0000 | 0.0143 | 0.0000 | 0.0000 | 0.0000 | 0.0072 | 0.0058 |
| NKX3-1_P871_R  | 0.0000 | 0.0000 | 0.9818 | 0.9858 | 0.9881 | 0.0025 | 0.0000 | 0.9747 | 0.9899 | 0.0000 | 0.9952 | 0.9887 | 0.9927 | 0.9805 | 0.9830 | 0.0000 |
| NOTCH1_E452_R  | 0.0000 | 0.2879 | 0.0000 | 0.0000 | 0.0000 | 0.0000 | 0.0000 | 0.0000 | 0.0000 | 0.0000 | 0.0000 | 0.0000 | 0.0000 | 0.0000 | 0.0000 | 0.0000 |
| NOTCH1_P1198_F | 0.0066 | 0.0018 | 0.0000 | 0.0000 | 0.0000 | 0.0000 | 0.0000 | 0.0000 | 0.9814 | 0.0073 | 0.0000 | 0.0002 | 0.0000 | 0.0000 | 0.0000 | 0.0050 |
| NOTCH2_P312_R  | 0.0129 | 0.0088 | 0.0089 | 0.0040 | 0.0055 | 0.0075 | 0.0058 | 0.0064 | 0.0000 | 0.0087 | 0.0114 | 0.0053 | 0.0089 | 0.0000 | 0.0020 | 0.0035 |
| NOTCH3_E403_F  | 0.0000 | 0.0010 | 0.0060 | 0.0000 | 0.0000 | 0.0000 | 0.0000 | 0.0000 | 0.0000 | 0.0000 | 0.0000 | 0.0000 | 0.0000 | 0.0000 | 0.0000 | 0.0000 |
| NPR2_P618_F    | 0.0226 | 0.0000 | 0.0000 | 0.0000 | 0.0000 | 0.0000 | 0.0130 | 0.0000 | 0.0000 | 0.0000 | 0.0000 | 0.4276 | 0.0052 | 0.6994 | 0.5195 | 0.0000 |
| NPY_P295_F     | 0.0445 | 0.0288 | 0.0536 | 0.0362 | 0.6477 | 0.0248 | 0.3791 | 0.0456 | 0.0000 | 0.0450 | 0.5326 | 0.0351 | 0.0272 | 0.0008 | 0.0583 | 0.0252 |
| NPY_P91_F      | 0.1369 | 0.0122 | 0.0161 | 0.1241 | 0.0223 | 0.1291 | 0.1157 | 0.0295 | 0.0000 | 0.0934 | 0.0371 | 0.0132 | 0.1124 | 0.0028 | 0.0236 | 0.0112 |
| NQO1_E74_R     | 0.0107 | 0.0090 | 0.0088 | 0.0000 | 0.0004 | 0.0000 | 0.0000 | 0.0038 | 0.0000 | 0.0553 | 0.0000 | 0.0032 | 0.0000 | 0.0000 | 0.0021 | 0.0044 |
| NQO1_P345_R    | 0.0000 | 0.0000 | 0.0055 | 0.0000 | 0.0000 | 0.0000 | 0.0000 | 0.0028 | 0.0000 | 0.0000 | 0.0000 | 0.0000 | 0.0020 | 0.0000 | 0.0000 | 0.0000 |
| NR2F6_E375_R   | 0.0133 | 0.0134 | 0.0084 | 0.0000 | 0.0254 | 0.1748 | 0.0103 | 0.0176 | 0.0000 | 0.0142 | 0.0130 | 0.3609 | 0.0063 | 0.0000 | 0.0158 | 0.0102 |
| NRAS_P103_R    | 0.0065 | 0.0100 | 0.0000 | 0.0000 | 0.0000 | 0.0071 | 0.0000 | 0.0042 | 0.0000 | 0.0000 | 0.0124 | 0.0080 | 0.0000 | 0.0000 | 0.0000 | 0.0044 |
| NRAS_P12_R     | 0.0000 | 0.0000 | 0.0000 | 0.0000 | 0.0000 | 0.0000 | 0.0000 | 0.0000 | 0.0000 | 0.0000 | 0.0000 | 0.0000 | 0.0000 | 0.0000 | 0.0000 | 0.0002 |
| NRG1_E74_F     | 0.0000 | 0.0000 | 0.0030 | 0.0033 | 0.0000 | 0.0000 | 0.0044 | 0.0024 | 0.0000 | 0.0000 | 0.0000 | 0.0011 | 0.0000 | 0.0000 | 0.0000 | 0.0017 |
| NRG1_P558_R    | 0.0121 | 0.0699 | 0.0120 | 0.0038 | 0.0119 | 0.0048 | 0.0039 | 0.0055 | 0.0000 | 0.0000 | 0.0348 | 0.0292 | 0.0215 | 0.0000 | 0.0037 | 0.0000 |
| NTRK2_P10_F    | 0.0000 | 0.0970 | 0.0045 | 0.0048 | 0.0000 | 0.0000 | 0.0000 | 0.0094 | 0.0000 | 0.0029 | 0.0000 | 0.0134 | 0.0010 | 0.0000 | 0.0012 | 0.0037 |
| NTRK2_P395_R   | 0.0000 | 0.0188 | 0.0000 | 0.0000 | 0.0000 | 0.0000 | 0.0000 | 0.0000 | 0.0000 | 0.0000 | 0.0000 | 0.0000 | 0.0000 | 0.0000 | 0.0000 | 0.0000 |
| NTRK3_E131_F   | 0.1139 | 0.0000 | 0.0000 | 0.0000 | 0.0056 | 0.0000 | 0.0000 | 0.0083 | 0.0000 | 0.0147 | 0.0132 | 0.0000 | 0.0082 | 0.0000 | 0.0000 | 0.0016 |
| NTRK3_P636_R   | 0.0000 | 0.0029 | 0.0000 | 0.0000 | 0.0000 | 0.0000 | 0.0012 | 0.0000 | 0.0000 | 0.0028 | 0.0037 | 0.0000 | 0.0000 | 0.0000 | 0.0000 | 0.0000 |
| NTRK3_P752_F   | 0.0000 | 0.0000 | 0.0025 | 0.0000 | 0.0000 | 0.0000 | 0.0000 | 0.0000 | 0.0000 | 0.0000 | 0.0000 | 0.0020 | 0.0000 | 0.0000 | 0.0000 | 0.0000 |
| NTSR1_E109_F   | 0.0145 | 0.0094 | 0.0142 | 0.0032 | 0.0129 | 0.0000 | 0.0065 | 0.0086 | 0.0000 | 0.0000 | 0.0000 | 0.0057 | 0.0000 | 0.0000 | 0.0125 | 0.0042 |
| NTSR1_P318_F   | 0.0510 | 0.0000 | 0.1230 | 0.7795 | 0.1233 | 0.0000 | 0.0120 | 0.0223 | 0.0000 | 0.4438 | 0.0000 | 0.2647 | 0.1130 | 0.0000 | 0.0000 | 0.0000 |



|                |        |        |        |        |        |        |        |        |        |        |        |        |        |        |        |        |
|----------------|--------|--------|--------|--------|--------|--------|--------|--------|--------|--------|--------|--------|--------|--------|--------|--------|
| PKD2_P287_R    | 0.0214 | 0.1457 | 0.0000 | 0.0000 | 0.0000 | 0.0082 | 0.0949 | 0.0519 | 0.0000 | 0.0142 | 0.0000 | 0.0490 | 0.1190 | 0.0000 | 0.0063 | 0.0000 |
| PKD2_P336_R    | 0.2689 | 0.0110 | 0.0239 | 0.8838 | 0.0148 | 0.0086 | 0.0056 | 0.0121 | 0.2396 | 0.0070 | 0.2251 | 0.0094 | 0.0075 | 0.0024 | 0.0101 | 0.0060 |
| PLAU_P11_F     | 0.0185 | 0.0174 | 0.0277 | 0.9883 | 0.0307 | 0.0123 | 0.2673 | 0.0260 | 0.0000 | 0.2433 | 0.3200 | 0.0119 | 0.3614 | 0.0028 | 0.0219 | 0.0136 |
| PLAU_P176_R    | 0.0100 | 0.0084 | 0.0000 | 0.0000 | 0.0000 | 0.0000 | 0.0000 | 0.0206 | 0.0000 | 0.0080 | 0.0000 | 0.0078 | 0.0046 | 0.0000 | 0.0000 | 0.0000 |
| PLAUR_E123_F   | 0.0118 | 0.0072 | 0.0084 | 0.0000 | 0.0050 | 0.0026 | 0.9849 | 0.0047 | 0.0000 | 0.0045 | 0.0000 | 0.3591 | 0.0000 | 0.0645 | 0.0002 | 0.0015 |
| PLAUR_P82_F    | 0.0121 | 0.0000 | 0.0108 | 0.0000 | 0.0000 | 0.0000 | 0.0013 | 0.0012 | 0.0000 | 0.0116 | 0.2663 | 0.0020 | 0.0107 | 0.0000 | 0.0000 | 0.0000 |
| PLG_E406_F     | 0.0000 | 0.0130 | 0.7997 | 0.6422 | 0.9167 | 0.9911 | 0.9133 | 0.9925 | 0.9901 | 0.0572 | 0.0068 | 0.9909 | 0.0005 | 0.9526 | 0.9892 | 0.9927 |
| PLSCR3_P751_R  | 0.1136 | 0.0140 | 0.6107 | 0.0127 | 0.0187 | 0.0087 | 0.3872 | 0.0142 | 0.3110 | 0.0156 | 0.0206 | 0.0127 | 0.0148 | 0.1642 | 0.1452 | 0.0109 |
| PLXDC1_P236_F  | 0.0109 | 0.0000 | 0.0000 | 0.0116 | 0.0051 | 0.0000 | 0.0000 | 0.0113 | 0.0000 | 0.0000 | 0.1289 | 0.0157 | 0.0101 | 0.0000 | 0.0052 | 0.0067 |
| PLXDC2_E337_F  | 0.0000 | 0.0000 | 0.0092 | 0.0017 | 0.0000 | 0.0000 | 0.0064 | 0.0065 | 0.0000 | 0.0130 | 0.0000 | 0.0000 | 0.0111 | 0.0000 | 0.0094 | 0.0079 |
| PLXDC2_P914_R  | 0.3757 | 0.3204 | 0.0470 | 0.0309 | 0.0676 | 0.0219 | 0.0424 | 0.0263 | 0.0000 | 0.4165 | 0.3580 | 0.0442 | 0.3528 | 0.0045 | 0.0380 | 0.2542 |
| PMP22_P975_F   | 0.0000 | 0.0049 | 0.8948 | 0.0000 | 0.0000 | 0.9917 | 0.9909 | 0.0000 | 0.9074 | 0.0038 | 0.0000 | 0.0000 | 0.9931 | 0.8940 | 0.9741 | 0.0000 |
| PODXL_P1341_R  | 0.0148 | 0.0000 | 0.0137 | 0.0050 | 0.0116 | 0.0000 | 0.0055 | 0.0094 | 0.0000 | 0.0545 | 0.1793 | 0.0066 | 0.0066 | 0.0000 | 0.0088 | 0.0064 |
| POMC_E254_F    | 0.6563 | 0.0099 | 0.3639 | 0.5902 | 0.9884 | 0.0113 | 0.0000 | 0.0095 | 0.0000 | 0.4846 | 0.0113 | 0.0000 | 0.0051 | 0.0019 | 0.0123 | 0.0135 |
| POMC_P400_R    | 0.1881 | 0.0000 | 0.0000 | 0.0000 | 0.1244 | 0.0000 | 0.0000 | 0.0107 | 0.0000 | 0.0000 | 0.0000 | 0.0000 | 0.0000 | 0.6582 | 0.0000 | 0.0000 |
| POMC_P53_F     | 0.0204 | 0.1440 | 0.0212 | 0.0091 | 0.0827 | 0.1521 | 0.0127 | 0.0105 | 0.0000 | 0.3657 | 0.0100 | 0.0131 | 0.0883 | 0.0000 | 0.0026 | 0.0071 |
| PPARD_P846_F   | 0.0000 | 0.0000 | 0.0133 | 0.0064 | 0.0000 | 0.0000 | 0.0000 | 0.0000 | 0.0000 | 0.0000 | 0.0000 | 0.0000 | 0.0000 | 0.0000 | 0.9753 | 0.0000 |
| PPARG_E178_R   | 0.0615 | 0.1348 | 0.0000 | 0.0064 | 0.0000 | 0.0060 | 0.0044 | 0.0133 | 0.0000 | 0.0000 | 0.1733 | 0.0000 | 0.0000 | 0.0000 | 0.0032 | 0.0045 |
| PPP2R1B_P268_R | 0.0000 | 0.0000 | 0.0209 | 0.0050 | 0.0000 | 0.0000 | 0.0042 | 0.0057 | 0.0000 | 0.0043 | 0.0000 | 0.0027 | 0.0000 | 0.0000 | 0.0000 | 0.0000 |
| PRDM2_P1340_R  | 0.0000 | 0.0875 | 0.0000 | 0.9779 | 0.7450 | 0.0040 | 0.1246 | 0.8813 | 0.9777 | 0.0000 | 0.0000 | 0.0000 | 0.1035 | 0.9676 | 0.9666 | 0.9834 |
| PRKCDBP_E206_F | 0.0643 | 0.0045 | 0.0086 | 0.0000 | 0.0000 | 0.0073 | 0.0000 | 0.0044 | 0.0000 | 0.0000 | 0.0953 | 0.0000 | 0.0000 | 0.0000 | 0.0000 | 0.0000 |
| PROK2_E0_F     | 0.0189 | 0.0072 | 0.0118 | 0.0061 | 0.0018 | 0.0000 | 0.0000 | 0.0068 | 0.0000 | 0.0083 | 0.0000 | 0.0040 | 0.0056 | 0.0000 | 0.0000 | 0.0028 |
| PROK2_P390_F   | 0.0000 | 0.0000 | 0.0000 | 0.0000 | 0.0000 | 0.0017 | 0.0000 | 0.0000 | 0.0000 | 0.0052 | 0.1135 | 0.0039 | 0.0000 | 0.0000 | 0.0000 | 0.0000 |
| PRSS8_E134_R   | 0.1738 | 0.2107 | 0.9863 | 0.3065 | 0.9869 | 0.9024 | 0.0000 | 0.9732 | 0.0000 | 0.9946 | 0.1563 | 0.0090 | 0.0084 | 0.9864 | 0.9613 | 0.9905 |
| PSCA_E359_F    | 0.0000 | 0.0073 | 0.0039 | 0.0000 | 0.0000 | 0.0021 | 0.3378 | 0.0031 | 0.0000 | 0.0000 | 0.0113 | 0.0000 | 0.0000 | 0.0000 | 0.0780 | 0.0000 |
| PSIP1_P163_R   | 0.1160 | 0.0000 | 0.1379 | 0.0000 | 0.0108 | 0.0090 | 0.0000 | 0.0104 | 0.0000 | 0.0000 | 0.0000 | 0.0060 | 0.0000 | 0.0000 | 0.0000 | 0.0077 |
| PTCH_E42_F     | 0.0000 | 0.0093 | 0.0133 | 0.0000 | 0.0085 | 0.0053 | 0.0075 | 0.0135 | 0.0000 | 0.0130 | 0.0000 | 0.0142 | 0.0000 | 0.0000 | 0.0130 | 0.0095 |
| PTCH2_P568_R   | 0.0244 | 0.0308 | 0.4292 | 0.0194 | 0.0084 | 0.0218 | 0.0280 | 0.0124 | 0.3895 | 0.0277 | 0.0459 | 0.0224 | 0.0111 | 0.3506 | 0.5703 | 0.0053 |
| PTEN_P438_F    | 0.0648 | 0.0097 | 0.0126 | 0.0076 | 0.0189 | 0.0019 | 0.0000 | 0.0171 | 0.0000 | 0.0115 | 0.0000 | 0.0175 | 0.0000 | 0.0000 | 0.0053 | 0.0391 |
| PTGS1_P2_F     | 0.0248 | 0.0400 | 0.0000 | 0.0111 | 0.0168 | 0.0000 | 0.0499 | 0.0149 | 0.0000 | 0.0000 | 0.0174 | 0.0106 | 0.0000 | 0.0000 | 0.0031 | 0.0072 |
| PTGS2_P308_F   | 0.0094 | 0.0478 | 0.3017 | 0.0053 | 0.0137 | 0.0111 | 0.0041 | 0.0068 | 0.0000 | 0.1797 | 0.0117 | 0.0035 | 0.1844 | 0.0000 | 0.0087 | 0.0097 |
| PTGS2_P524_R   | 0.0263 | 0.0000 | 0.0210 | 0.0090 | 0.0000 | 0.0000 | 0.0105 | 0.0106 | 0.0000 | 0.0240 | 0.0151 | 0.0000 | 0.0000 | 0.0000 | 0.0046 | 0.0039 |
| PTHLH_P15_R    | 0.9803 | 0.0078 | 0.0758 | 0.0005 | 0.0000 | 0.0035 | 0.0013 | 0.0037 | 0.0000 | 0.0000 | 0.1262 | 0.0000 | 0.0000 | 0.0000 | 0.7653 | 0.0015 |

|                   |        |        |        |        |        |        |        |        |        |        |        |        |        |        |        |        |
|-------------------|--------|--------|--------|--------|--------|--------|--------|--------|--------|--------|--------|--------|--------|--------|--------|--------|
| PTHR1_P170_R      | 0.0101 | 0.0225 | 0.9856 | 0.0000 | 0.9910 | 0.0000 | 0.0000 | 0.9119 | 0.0000 | 0.0000 | 0.0000 | 0.9913 | 0.0000 | 0.5997 | 0.9739 | 0.0000 |
| PTK2_P735_R       | 0.0000 | 0.0108 | 0.0223 | 0.2701 | 0.0085 | 0.2519 | 0.0392 | 0.0272 | 0.0000 | 0.0000 | 0.0794 | 0.0708 | 0.0096 | 0.0000 | 0.0316 | 0.0000 |
| PTK2B_P673_R      | 0.0000 | 0.0081 | 0.0070 | 0.0026 | 0.0000 | 0.0000 | 0.0045 | 0.0118 | 0.0000 | 0.0096 | 0.0000 | 0.0046 | 0.0033 | 0.0000 | 0.0013 | 0.0000 |
| PTPN6_E171_R      | 0.0087 | 0.0027 | 0.0007 | 0.0000 | 0.0000 | 0.0000 | 0.0000 | 0.0000 | 0.0000 | 0.0029 | 0.0000 | 0.0000 | 0.0000 | 0.0000 | 0.0000 | 0.0000 |
| PTPN6_P282_R      | 0.0003 | 0.0000 | 0.0000 | 0.0000 | 0.0000 | 0.0000 | 0.0000 | 0.0000 | 0.0000 | 0.0000 | 0.0000 | 0.0000 | 0.0041 | 0.0000 | 0.0000 | 0.0000 |
| PTPNS1_E433_R     | 0.0059 | 0.0000 | 0.0002 | 0.0000 | 0.0000 | 0.0000 | 0.0000 | 0.0000 | 0.0000 | 0.0000 | 0.0000 | 0.0000 | 0.0008 | 0.0000 | 0.0000 | 0.0011 |
| PTPNS1_P301_R     | 0.0201 | 0.4773 | 0.0115 | 0.0000 | 0.0071 | 0.0000 | 0.0450 | 0.0138 | 0.0000 | 0.0000 | 0.0000 | 0.0000 | 0.0060 | 0.0000 | 0.0075 | 0.0075 |
| PTPRF_E178_R      | 0.0064 | 0.7702 | 0.0047 | 0.0020 | 0.0000 | 0.0022 | 0.5585 | 0.0324 | 0.4811 | 0.0000 | 0.0055 | 0.0000 | 0.0034 | 0.1977 | 0.2325 | 0.8541 |
| PTPRG_E40_R       | 0.1987 | 0.0097 | 0.0298 | 0.3793 | 0.0545 | 0.3356 | 0.0049 | 0.0140 | 0.0000 | 0.0115 | 0.1365 | 0.0106 | 0.1575 | 0.0000 | 0.0097 | 0.2158 |
| PTPRG_P476_F      | 0.0023 | 0.2303 | 0.0118 | 0.0046 | 0.0029 | 0.0064 | 0.0091 | 0.0058 | 0.0000 | 0.0000 | 0.0077 | 0.0079 | 0.0000 | 0.0000 | 0.0000 | 0.0076 |
| PTPRO_E56_F       | 0.0118 | 0.0047 | 0.0077 | 0.0024 | 0.0000 | 0.0047 | 0.0034 | 0.0061 | 0.0000 | 0.0000 | 0.0259 | 0.0000 | 0.0239 | 0.0000 | 0.0000 | 0.0052 |
| PURA_P928_R       | 0.0117 | 0.0000 | 0.0000 | 0.0019 | 0.0000 | 0.0000 | 0.0000 | 0.0065 | 0.0000 | 0.0000 | 0.0000 | 0.0000 | 0.0000 | 0.0000 | 0.0000 | 0.0000 |
| PWCR1_P811_F      | 0.0000 | 0.0000 | 0.9892 | 0.0042 | 0.9829 | 0.0000 | 0.0000 | 0.6605 | 0.0000 | 0.0000 | 0.9948 | 0.9873 | 0.9739 | 0.8740 | 0.6459 | 0.0000 |
| PYCARD_E87_F      | 0.0197 | 0.0099 | 0.0199 | 0.1373 | 0.0376 | 0.0130 | 0.0078 | 0.0179 | 0.0000 | 0.0149 | 0.0745 | 0.0470 | 0.1085 | 0.0000 | 0.0346 | 0.0075 |
| PYCARD_P150_F     | 0.0130 | 0.0326 | 0.0148 | 0.6867 | 0.0090 | 0.0000 | 0.1414 | 0.0138 | 0.0000 | 0.0095 | 0.0167 | 0.0095 | 0.0000 | 0.0438 | 0.8074 | 0.0067 |
| RAB32_E314_R      | 0.0000 | 0.0000 | 0.0129 | 0.0062 | 0.0033 | 0.0052 | 0.0000 | 0.0065 | 0.0000 | 0.0000 | 0.0000 | 0.0000 | 0.0000 | 0.1077 | 0.0000 | 0.0037 |
| RAB32_P493_R      | 0.0116 | 0.0000 | 0.0081 | 0.0010 | 0.0000 | 0.0000 | 0.0000 | 0.0007 | 0.0000 | 0.0000 | 0.0081 | 0.0000 | 0.0000 | 0.0000 | 0.0000 | 0.0000 |
| RAF1_P330_F       | 0.0000 | 0.0000 | 0.3470 | 0.0015 | 0.0000 | 0.0001 | 0.0000 | 0.0030 | 0.0000 | 0.0064 | 0.0000 | 0.0033 | 0.0000 | 0.0000 | 0.0000 | 0.0000 |
| RAN_P581_R        | 0.0000 | 0.0000 | 0.0081 | 0.0026 | 0.9871 | 0.0000 | 0.0000 | 0.0078 | 0.0000 | 0.0000 | 0.0000 | 0.0032 | 0.0000 | 0.8555 | 0.0005 | 0.0015 |
| RARA_E128_R       | 0.0000 | 0.0000 | 0.0094 | 0.0057 | 0.0090 | 0.0000 | 0.0000 | 0.0067 | 0.0000 | 0.0530 | 0.0000 | 0.0082 | 0.0000 | 0.0000 | 0.0979 | 0.0046 |
| RARA_P176_R       | 0.0000 | 0.7927 | 0.0000 | 0.0000 | 0.0000 | 0.9617 | 0.0000 | 0.0000 | 0.0000 | 0.0000 | 0.0117 | 0.0004 | 0.0000 | 0.0000 | 0.0000 | 0.0000 |
| RARB_E114_F       | 0.0079 | 0.0000 | 0.0121 | 0.0032 | 0.0021 | 0.0039 | 0.0041 | 0.0080 | 0.0000 | 0.0065 | 0.0000 | 0.0041 | 0.0013 | 0.0000 | 0.0001 | 0.0036 |
| RARB_P60_F        | 0.0048 | 0.0000 | 0.0091 | 0.0042 | 0.0000 | 0.0000 | 0.0033 | 0.0000 | 0.0000 | 0.0000 | 0.0000 | 0.0023 | 0.0036 | 0.0241 | 0.0000 | 0.0000 |
| RARRES1_E235_F    | 0.0424 | 0.0172 | 0.5822 | 0.1485 | 0.0107 | 0.0116 | 0.0119 | 0.0245 | 0.0000 | 0.0205 | 0.1672 | 0.0157 | 0.0138 | 0.0000 | 0.0043 | 0.0644 |
| RASGRF1_E16_F     | 0.1784 | 0.1773 | 0.1898 | 0.0080 | 0.0000 | 0.0062 | 0.0000 | 0.0096 | 0.0000 | 0.1470 | 0.0000 | 0.0064 | 0.2343 | 0.1830 | 0.0038 | 0.0060 |
| RASGRF1_P768_F    | 0.4222 | 0.0317 | 0.0150 | 0.0032 | 0.0424 | 0.2173 | 0.0000 | 0.0033 | 0.0000 | 0.3012 | 0.3362 | 0.2187 | 0.0084 | 0.0000 | 0.0086 | 0.1261 |
| RASSF1_E116_F     | 0.0428 | 0.0059 | 0.0033 | 0.0000 | 0.0000 | 0.2982 | 0.0000 | 0.2975 | 0.0000 | 0.0000 | 0.0000 | 0.0107 | 0.0000 | 0.0000 | 0.0002 | 0.0057 |
| RASSF1_P244_F     | 0.0000 | 0.0000 | 0.0113 | 0.0091 | 0.0000 | 0.0105 | 0.0911 | 0.0136 | 0.0000 | 0.0000 | 0.0000 | 0.0082 | 0.0101 | 0.0000 | 0.0052 | 0.1674 |
| RBL2_P250_R       | 0.0145 | 0.0130 | 0.2521 | 0.1497 | 0.0053 | 0.0054 | 0.0069 | 0.0164 | 0.9791 | 0.0103 | 0.0000 | 0.1733 | 0.0000 | 0.3284 | 0.0000 | 0.0072 |
| RBP1_E158_F       | 0.0000 | 0.0043 | 0.0059 | 0.0008 | 0.0000 | 0.0000 | 0.0000 | 0.0000 | 0.0000 | 0.0000 | 0.0000 | 0.0000 | 0.0000 | 0.0000 | 0.0000 | 0.0000 |
| RBP1_P150_F       | 0.0000 | 0.0000 | 0.0032 | 0.0000 | 0.0000 | 0.0000 | 0.0000 | 0.0000 | 0.0000 | 0.0000 | 0.0000 | 0.0000 | 0.0000 | 0.0000 | 0.0000 | 0.0000 |
| RET_P717_F        | 0.0137 | 0.0117 | 0.2593 | 0.0091 | 0.0042 | 0.0228 | 0.0087 | 0.0115 | 0.0000 | 0.0000 | 0.0138 | 0.0092 | 0.0118 | 0.0000 | 0.0027 | 0.0141 |
| RET_seq_53_S374_F | 0.0000 | 0.7709 | 0.0170 | 0.2637 | 0.0841 | 0.2182 | 0.0000 | 0.0064 | 0.0000 | 0.0000 | 0.0060 | 0.2514 | 0.1851 | 0.0000 | 0.0261 | 0.0947 |



|                      |        |        |        |        |        |        |        |        |        |        |        |        |        |        |        |        |
|----------------------|--------|--------|--------|--------|--------|--------|--------|--------|--------|--------|--------|--------|--------|--------|--------|--------|
| SFRP1_P157_F         | 0.0132 | 0.0000 | 0.0134 | 0.0051 | 0.0000 | 0.0000 | 0.0037 | 0.0079 | 0.0000 | 0.0043 | 0.0103 | 0.0480 | 0.0000 | 0.0000 | 0.0024 | 0.0000 |
| SFTPA1_E340_R        | 0.0000 | 0.0000 | 0.9889 | 0.0000 | 0.0000 | 0.0000 | 0.9908 | 0.9782 | 0.9894 | 0.0000 | 0.0000 | 0.0000 | 0.0000 | 0.9836 | 0.9804 | 0.9901 |
| SH3BP2_P771_R        | 0.0240 | 0.0062 | 0.0000 | 0.0032 | 0.0000 | 0.0058 | 0.0000 | 0.0044 | 0.0000 | 0.0081 | 0.0000 | 0.0000 | 0.0000 | 0.4076 | 0.1482 | 0.0000 |
| SHB_P473_R           | 0.0116 | 0.0073 | 0.0000 | 0.0045 | 0.0000 | 0.0000 | 0.0000 | 0.0033 | 0.0000 | 0.0000 | 0.0087 | 0.4190 | 0.0031 | 0.0000 | 0.0000 | 0.0000 |
| SHB_P691_R           | 0.0279 | 0.1220 | 0.0184 | 0.4686 | 0.7120 | 0.4975 | 0.3265 | 0.0303 | 0.0000 | 0.0095 | 0.0000 | 0.0104 | 0.2413 | 0.2650 | 0.0100 | 0.0117 |
| SHH_E328_F           | 0.0000 | 0.0000 | 0.0000 | 0.0000 | 0.0000 | 0.0000 | 0.0000 | 0.8579 | 0.0000 | 0.0000 | 0.0058 | 0.0000 | 0.0000 | 0.6419 | 0.0000 | 0.0000 |
| SHH_P104_R           | 0.2523 | 0.0000 | 0.0000 | 0.0098 | 0.0021 | 0.0000 | 0.0068 | 0.0107 | 0.0000 | 0.0106 | 0.0000 | 0.0077 | 0.4516 | 0.0000 | 0.0046 | 0.0107 |
| SIN3B_P514_R         | 0.9642 | 0.0000 | 0.9516 | 0.0000 | 0.9523 | 0.9388 | 0.9577 | 0.9564 | 0.0000 | 0.0000 | 0.0000 | 0.9726 | 0.9827 | 0.9706 | 0.9690 | 0.0000 |
| SKI_E465_R           | 0.0000 | 0.0000 | 0.0095 | 0.0086 | 0.0058 | 0.0058 | 0.0000 | 0.0081 | 0.0000 | 0.0000 | 0.0104 | 0.0000 | 0.0058 | 0.0000 | 0.0006 | 0.0043 |
| SLC22A2_E271_R       | 0.9952 | 0.0102 | 0.8732 | 0.9937 | 0.0430 | 0.0000 | 0.9916 | 0.9818 | 0.9903 | 0.0105 | 0.0000 | 0.0000 | 0.9775 | 0.9715 | 0.9865 | 0.9126 |
| SLC22A3_P634_F       | 0.8969 | 0.0544 | 0.2985 | 0.0087 | 0.5318 | 0.0023 | 0.0000 | 0.0115 | 0.4184 | 0.0000 | 0.0000 | 0.0059 | 0.0000 | 0.3922 | 0.2844 | 0.0083 |
| SLC6A8_seq_28_S227_F | 0.0045 | 0.0000 | 0.0000 | 0.0000 | 0.0000 | 0.0000 | 0.0000 | 0.0024 | 0.0000 | 0.0000 | 0.0000 | 0.0057 | 0.0034 | 0.0000 | 0.0000 | 0.0000 |
| SLIT2_P208_F         | 0.1521 | 0.2658 | 0.2568 | 0.0052 | 0.9680 | 0.0000 | 0.0042 | 0.0170 | 0.0000 | 0.3570 | 0.6058 | 0.0104 | 0.3143 | 0.0000 | 0.0143 | 0.2600 |
| SMAD2_P708_R         | 0.0000 | 0.0022 | 0.0000 | 0.0000 | 0.0037 | 0.0015 | 0.0000 | 0.0103 | 0.0000 | 0.0098 | 0.0030 | 0.0000 | 0.0000 | 0.0000 | 0.0033 | 0.0000 |
| SMAD2_P848_R         | 0.0000 | 0.0000 | 0.0103 | 0.0007 | 0.0000 | 0.0000 | 0.0000 | 0.0039 | 0.0000 | 0.0048 | 0.0000 | 0.0049 | 0.0036 | 0.0000 | 0.0003 | 0.0001 |
| SMAD4_P474_R         | 0.0058 | 0.0010 | 0.0006 | 0.0000 | 0.0000 | 0.0012 | 0.0000 | 0.0000 | 0.0000 | 0.0000 | 0.0041 | 0.0000 | 0.0029 | 0.0000 | 0.0000 | 0.0000 |
| SMARCA3_E20_F        | 0.0094 | 0.0000 | 0.0082 | 0.0024 | 0.0063 | 0.0000 | 0.0023 | 0.0047 | 0.0000 | 0.0000 | 0.0000 | 0.0046 | 0.0000 | 0.0000 | 0.0002 | 0.0000 |
| SMARCA3_P109_R       | 0.4269 | 0.0773 | 0.0146 | 0.0182 | 0.0292 | 0.0134 | 0.4706 | 0.0218 | 0.0000 | 0.4175 | 0.0072 | 0.0066 | 0.6198 | 0.0000 | 0.0210 | 0.0077 |
| SMARCA3_P17_R        | 0.0000 | 0.0073 | 0.0114 | 0.0057 | 0.0000 | 0.0000 | 0.0000 | 0.0000 | 0.0000 | 0.0000 | 0.0000 | 0.0043 | 0.0000 | 0.0000 | 0.0000 | 0.0000 |
| SMARCA4_P362_R       | 0.0104 | 0.0273 | 0.0523 | 0.0083 | 0.0090 | 0.0298 | 0.0397 | 0.0073 | 0.0000 | 0.0052 | 0.0101 | 0.0060 | 0.0066 | 0.0000 | 0.0075 | 0.0042 |
| SMO_E57_F            | 0.0000 | 0.0000 | 0.0000 | 0.0000 | 0.6584 | 0.0041 | 0.0000 | 0.0016 | 0.0000 | 0.0000 | 0.0000 | 0.0003 | 0.0054 | 0.0000 | 0.0004 | 0.0000 |
| SOD3_P225_F          | 0.0561 | 0.8531 | 0.9531 | 0.9885 | 0.9293 | 0.0000 | 0.0131 | 0.9309 | 0.9885 | 0.1131 | 0.2987 | 0.0000 | 0.1856 | 0.8983 | 0.9725 | 0.9901 |
| SOX1_P1018_R         | 0.2994 | 0.0722 | 0.0070 | 0.0000 | 0.0269 | 0.0000 | 0.0000 | 0.0092 | 0.0000 | 0.0000 | 0.0000 | 0.0418 | 0.0035 | 0.0000 | 0.0076 | 0.0006 |
| SOX1_P294_F          | 0.6487 | 0.0163 | 0.0236 | 0.0141 | 0.0414 | 0.0179 | 0.1844 | 0.0261 | 0.0000 | 0.5884 | 0.6140 | 0.0170 | 0.6264 | 0.0000 | 0.0365 | 0.3852 |
| SOX17_P287_R         | 0.0215 | 0.0083 | 0.0012 | 0.0000 | 0.0000 | 0.0000 | 0.0000 | 0.0000 | 0.0000 | 0.0046 | 0.0000 | 0.0000 | 0.0003 | 0.0000 | 0.0000 | 0.0000 |
| SOX17_P303_F         | 0.7300 | 0.7431 | 0.8659 | 0.9124 | 0.4812 | 0.5858 | 0.8847 | 0.0978 | 0.8744 | 0.1199 | 0.7589 | 0.1517 | 0.7126 | 0.1288 | 0.0888 | 0.1005 |
| SOX2_P546_F          | 0.0150 | 0.0000 | 0.0157 | 0.0096 | 0.0183 | 0.0068 | 0.0000 | 0.0104 | 0.0000 | 0.0000 | 0.0000 | 0.0050 | 0.0000 | 0.0000 | 0.0087 | 0.0056 |
| SPARC_E50_R          | 0.0119 | 0.0305 | 0.0480 | 0.0030 | 0.0105 | 0.0044 | 0.9636 | 0.0093 | 0.0000 | 0.0199 | 0.0123 | 0.0070 | 0.0074 | 0.0081 | 0.3332 | 0.0102 |
| SPARC_P195_F         | 0.0135 | 0.0000 | 0.0000 | 0.0048 | 0.0053 | 0.0064 | 0.0000 | 0.0083 | 0.0000 | 0.0093 | 0.0000 | 0.0055 | 0.0000 | 0.8650 | 0.2222 | 0.0065 |
| SPDEF_E116_R         | 0.2866 | 0.0892 | 0.0393 | 0.2335 | 0.1937 | 0.2456 | 0.1933 | 0.0210 | 0.0000 | 0.0110 | 0.2327 | 0.1921 | 0.2100 | 0.0000 | 0.9756 | 0.0101 |
| SPI1_E205_F          | 0.1359 | 0.1833 | 0.0216 | 0.3621 | 0.5391 | 0.9924 | 0.0193 | 0.8543 | 0.8315 | 0.1580 | 0.1483 | 0.6698 | 0.1812 | 0.0074 | 0.5119 | 0.2710 |
| SPP1_E140_R          | 0.0000 | 0.0000 | 0.5392 | 0.0069 | 0.0000 | 0.0105 | 0.0060 | 0.0086 | 0.0000 | 0.0099 | 0.0000 | 0.4196 | 0.0063 | 0.0000 | 0.0000 | 0.0069 |
| SRC_P297_F           | 0.2714 | 0.0000 | 0.1087 | 0.9917 | 0.9894 | 0.3294 | 0.1391 | 0.9831 | 0.9832 | 0.1109 | 0.9964 | 0.3015 | 0.2545 | 0.9857 | 0.9846 | 0.9911 |



|                |        |        |        |        |        |        |        |        |        |        |        |        |        |        |        |        |
|----------------|--------|--------|--------|--------|--------|--------|--------|--------|--------|--------|--------|--------|--------|--------|--------|--------|
| ST6GAL1_P164_R | 0.2448 | 0.0000 | 0.0155 | 0.1168 | 0.0000 | 0.0000 | 0.0000 | 0.0931 | 0.0000 | 0.0000 | 0.0000 | 0.0683 | 0.0550 | 0.0000 | 0.4914 | 0.0000 |
| ST6GAL1_P528_F | 0.2529 | 0.0000 | 0.0078 | 0.0055 | 0.9815 | 0.0055 | 0.0000 | 0.0066 | 0.0000 | 0.0000 | 0.0061 | 0.0077 | 0.0027 | 0.0000 | 0.0000 | 0.0057 |
| STK23_E182_R   | 0.1274 | 0.0000 | 0.6921 | 0.0213 | 0.0000 | 0.0045 | 0.0000 | 0.9630 | 0.9857 | 0.0000 | 0.0000 | 0.0000 | 0.0084 | 0.0000 | 0.9375 | 0.0000 |
| SYK_E372_F     | 0.0880 | 0.1297 | 0.0261 | 0.3855 | 0.3898 | 0.0267 | 0.0000 | 0.0481 | 0.0000 | 0.1963 | 0.1420 | 0.0349 | 0.0752 | 0.0000 | 0.0634 | 0.0068 |
| TAL1_E122_F    | 0.0152 | 0.0135 | 0.0166 | 0.0092 | 0.0172 | 0.1646 | 0.1990 | 0.0105 | 0.0000 | 0.5606 | 0.0134 | 0.4299 | 0.0111 | 0.0000 | 0.0114 | 0.0074 |
| TAL1_P594_F    | 0.0000 | 0.9823 | 0.0052 | 0.0000 | 0.0067 | 0.0000 | 0.0000 | 0.0040 | 0.0000 | 0.0000 | 0.0000 | 0.0056 | 0.0000 | 0.0000 | 0.0036 | 0.0021 |
| TAL1_P817_F    | 0.0000 | 0.0000 | 0.0000 | 0.0000 | 0.0000 | 0.0000 | 0.0000 | 0.0000 | 0.0000 | 0.0000 | 0.0000 | 0.0000 | 0.0000 | 0.0000 | 0.0000 | 0.0000 |
| TCF4_P175_R    | 0.0000 | 0.0000 | 0.0000 | 0.0000 | 0.0000 | 0.0000 | 0.0000 | 0.0020 | 0.0000 | 0.0000 | 0.0000 | 0.0000 | 0.0000 | 0.0000 | 0.0000 | 0.0000 |
| TCF7L2_E411_F  | 0.0044 | 0.0000 | 0.0000 | 0.0000 | 0.0025 | 0.0000 | 0.0021 | 0.0000 | 0.0000 | 0.0026 | 0.0000 | 0.0000 | 0.0000 | 0.0000 | 0.0000 | 0.0010 |
| TCF7L2_P193_R  | 0.0000 | 0.0000 | 0.0096 | 0.0059 | 0.0002 | 0.0000 | 0.0000 | 0.0078 | 0.0000 | 0.0000 | 0.0095 | 0.0032 | 0.0000 | 0.0000 | 0.0010 | 0.0054 |
| TERT_E20_F     | 0.9950 | 0.0111 | 0.0165 | 0.0103 | 0.0102 | 0.0062 | 0.0060 | 0.0161 | 0.0000 | 0.0085 | 0.1964 | 0.0355 | 0.0065 | 0.0077 | 0.0158 | 0.1200 |
| TERT_P360_R    | 0.4372 | 0.7224 | 0.0201 | 0.4867 | 0.0161 | 0.1734 | 0.5559 | 0.0253 | 0.0000 | 0.1983 | 0.0218 | 0.0215 | 0.0155 | 0.3002 | 0.0344 | 0.4273 |
| TES_E172_F     | 0.0000 | 0.0145 | 0.0000 | 0.0107 | 0.0000 | 0.0070 | 0.0145 | 0.0081 | 0.0000 | 0.2262 | 0.0000 | 0.0117 | 0.0045 | 0.0000 | 0.0000 | 0.1590 |
| TESK2_P252_R   | 0.0133 | 0.0417 | 0.0121 | 0.0868 | 0.0085 | 0.0425 | 0.0072 | 0.0072 | 0.0000 | 0.0107 | 0.0097 | 0.0076 | 0.0434 | 0.0000 | 0.0123 | 0.0234 |
| TFAP2C_E260_F  | 0.0127 | 0.0000 | 0.0000 | 0.0000 | 0.0000 | 0.0000 | 0.0000 | 0.0000 | 0.0000 | 0.0051 | 0.0000 | 0.0079 | 0.0000 | 0.0000 | 0.0000 | 0.0130 |
| TFAP2C_P765_F  | 0.0101 | 0.0000 | 0.0085 | 0.0000 | 0.0006 | 0.0000 | 0.0000 | 0.0096 | 0.0000 | 0.0000 | 0.0000 | 0.0000 | 0.0000 | 0.0000 | 0.0051 | 0.0035 |
| TFF2_P178_F    | 0.8212 | 0.9830 | 0.7360 | 0.9400 | 0.8846 | 0.8655 | 0.9708 | 0.6175 | 0.9177 | 0.8275 | 0.8273 | 0.7957 | 0.8149 | 0.9789 | 0.9837 | 0.7721 |
| TFF2_P557_R    | 0.0000 | 0.9959 | 0.9880 | 0.9922 | 0.9878 | 0.9935 | 0.0000 | 0.9857 | 0.0000 | 0.2959 | 0.0000 | 0.9942 | 0.0930 | 0.9881 | 0.9611 | 0.0000 |
| TFPI2_E141_F   | 0.0113 | 0.0000 | 0.0000 | 0.0000 | 0.0000 | 0.0000 | 0.0000 | 0.0014 | 0.0000 | 0.0000 | 0.0000 | 0.0015 | 0.0000 | 0.0000 | 0.0000 | 0.0000 |
| TFPI2_P152_R   | 0.0362 | 0.1494 | 0.0330 | 0.5021 | 0.9524 | 0.0907 | 0.1054 | 0.0144 | 0.0000 | 0.2945 | 0.3244 | 0.3167 | 0.2507 | 0.0000 | 0.0081 | 0.0143 |
| TFPI2_P9_F     | 0.0226 | 0.2700 | 0.0266 | 0.5023 | 0.0285 | 0.0112 | 0.0198 | 0.0153 | 0.0000 | 0.0123 | 0.5441 | 0.0165 | 0.0148 | 0.0000 | 0.0419 | 0.0169 |
| TFRC_P414_R    | 0.0223 | 0.0091 | 0.0103 | 0.0095 | 0.0151 | 0.0159 | 0.3500 | 0.0159 | 0.0000 | 0.2372 | 0.2066 | 0.1456 | 0.3706 | 0.0000 | 0.0000 | 0.0000 |
| TGFA_P558_F    | 0.0164 | 0.0047 | 0.0172 | 0.0024 | 0.0000 | 0.3886 | 0.0000 | 0.0633 | 0.0000 | 0.0000 | 0.0000 | 0.0082 | 0.3001 | 0.0000 | 0.0013 | 0.0000 |
| TGFA_P642_R    | 0.0117 | 0.0000 | 0.0000 | 0.0000 | 0.0043 | 0.0000 | 0.0000 | 0.0171 | 0.0000 | 0.0000 | 0.0000 | 0.0000 | 0.0000 | 0.0000 | 0.0053 | 0.0000 |
| TGFB1_P833_R   | 0.0000 | 0.1350 | 0.9894 | 0.0000 | 0.9824 | 0.9829 | 0.0218 | 0.7674 | 0.0000 | 0.9955 | 0.9965 | 0.0000 | 0.6971 | 0.9834 | 0.9811 | 0.9905 |
| TGFB2_E226_R   | 0.0000 | 0.0003 | 0.0000 | 0.0000 | 0.0000 | 0.0103 | 0.0000 | 0.0080 | 0.0000 | 0.0029 | 0.0207 | 0.0105 | 0.0000 | 0.0000 | 0.0000 | 0.0000 |
| TGFB2_P632_F   | 0.0190 | 0.0000 | 0.0185 | 0.0000 | 0.0099 | 0.0096 | 0.0095 | 0.0115 | 0.0000 | 0.1589 | 0.1003 | 0.0126 | 0.0095 | 0.0000 | 0.0178 | 0.0077 |
| TGFB3_E58_R    | 0.0000 | 0.9939 | 0.6890 | 0.6516 | 0.7216 | 0.9865 | 0.9907 | 0.9862 | 0.9507 | 0.0000 | 0.0000 | 0.0000 | 0.0000 | 0.8609 | 0.9896 | 0.0023 |
| TGFBI_P173_F   | 0.1626 | 0.1697 | 0.0281 | 0.0134 | 0.4146 | 0.0776 | 0.1291 | 0.0148 | 0.0000 | 0.2975 | 0.0138 | 0.0908 | 0.0065 | 0.0000 | 0.9351 | 0.0097 |
| TGFBI_P31_R    | 0.2431 | 0.0064 | 0.0129 | 0.0000 | 0.6426 | 0.0070 | 0.9935 | 0.0139 | 0.0000 | 0.0211 | 0.0000 | 0.0076 | 0.0081 | 0.3297 | 0.0052 | 0.1297 |
| TGFBR3_E188_R  | 0.0000 | 0.0061 | 0.0039 | 0.0000 | 0.0000 | 0.0000 | 0.0000 | 0.0030 | 0.0000 | 0.0000 | 0.0000 | 0.0000 | 0.0054 | 0.0000 | 0.0000 | 0.0016 |
| TGFBR3_P429_F  | 0.0000 | 0.0066 | 0.0000 | 0.0000 | 0.0000 | 0.0000 | 0.0000 | 0.0025 | 0.0000 | 0.0000 | 0.0000 | 0.0043 | 0.0000 | 0.0000 | 0.0000 | 0.0000 |
| THBS1_E207_R   | 0.0163 | 0.0000 | 0.3206 | 0.0000 | 0.0032 | 0.0096 | 0.0000 | 0.0094 | 0.0000 | 0.0100 | 0.1021 | 0.0000 | 0.0087 | 0.0000 | 0.0036 | 0.0000 |

|                   |        |        |        |        |        |        |        |        |        |        |        |        |        |        |        |        |
|-------------------|--------|--------|--------|--------|--------|--------|--------|--------|--------|--------|--------|--------|--------|--------|--------|--------|
| THBS1_P500_F      | 0.0244 | 0.0195 | 0.0264 | 0.0154 | 0.0108 | 0.4440 | 0.0148 | 0.2756 | 0.0000 | 0.0086 | 0.0190 | 0.0000 | 0.0131 | 0.0066 | 0.0165 | 0.0090 |
| THBS2_E129_F      | 0.2787 | 0.0042 | 0.0089 | 0.0038 | 0.0020 | 0.0058 | 0.0098 | 0.0062 | 0.0000 | 0.0039 | 0.0000 | 0.0035 | 0.0089 | 0.0000 | 0.0000 | 0.0039 |
| THY1_P149_R       | 0.2726 | 0.1432 | 0.0280 | 0.5636 | 0.0501 | 0.4834 | 0.0138 | 0.0252 | 0.0000 | 0.1743 | 0.1357 | 0.0227 | 0.2215 | 0.0194 | 0.1048 | 0.2717 |
| TIAM1_P188_R      | 0.0122 | 0.0062 | 0.0067 | 0.0039 | 0.0005 | 0.0022 | 0.0000 | 0.0040 | 0.0000 | 0.0000 | 0.0000 | 0.0000 | 0.0009 | 0.0000 | 0.0000 | 0.0006 |
| TIMP1_E254_R      | 0.0369 | 0.0083 | 0.2808 | 0.9889 | 0.0093 | 0.0072 | 0.0472 | 0.0255 | 0.6029 | 0.0077 | 0.0460 | 0.0122 | 0.0452 | 0.0000 | 0.0146 | 0.0094 |
| TIMP1_P615_R      | 0.0000 | 0.0000 | 0.0000 | 0.3682 | 0.0000 | 0.0000 | 0.9887 | 0.0000 | 0.9795 | 0.0000 | 0.0000 | 0.0000 | 0.0000 | 0.9660 | 0.9054 | 0.6105 |
| TIMP2_E394_R      | 0.0000 | 0.0067 | 0.0160 | 0.0000 | 0.0004 | 0.0000 | 0.0313 | 0.1398 | 0.0000 | 0.1384 | 0.0000 | 0.0048 | 0.0000 | 0.0000 | 0.0000 | 0.0000 |
| TIMP2_P267_F      | 0.0102 | 0.0058 | 0.0027 | 0.0003 | 0.0031 | 0.0000 | 0.5624 | 0.0040 | 0.0000 | 0.0034 | 0.0050 | 0.0041 | 0.0078 | 0.0000 | 0.6034 | 0.0043 |
| TIMP3_P1114_R     | 0.2318 | 0.6798 | 0.9852 | 0.9920 | 0.8941 | 0.9926 | 0.2048 | 0.9762 | 0.9890 | 0.1158 | 0.9961 | 0.1525 | 0.9952 | 0.9897 | 0.9862 | 0.9914 |
| TIMP3_P690_R      | 0.9962 | 0.9947 | 0.9863 | 0.9888 | 0.9906 | 0.9894 | 0.9909 | 0.9890 | 0.9929 | 0.0000 | 0.0000 | 0.9933 | 0.9940 | 0.9905 | 0.9915 | 0.0000 |
| TIMP3_seq_7_S38_F | 0.0208 | 0.4535 | 0.0215 | 0.0081 | 0.2497 | 0.3953 | 0.0000 | 0.3204 | 0.0000 | 0.0614 | 0.0638 | 0.5073 | 0.1469 | 0.0000 | 0.0088 | 0.0000 |
| TJP1_P326_R       | 0.0233 | 0.0762 | 0.0246 | 0.0709 | 0.0718 | 0.0135 | 0.0661 | 0.0096 | 0.0000 | 0.0260 | 0.1559 | 0.0183 | 0.0304 | 0.0000 | 0.0255 | 0.1218 |
| TJP1_P390_F       | 0.0000 | 0.0099 | 0.0101 | 0.0000 | 0.0057 | 0.2029 | 0.0000 | 0.0045 | 0.0000 | 0.0000 | 0.0000 | 0.0000 | 0.0000 | 0.0000 | 0.0004 | 0.0062 |
| TK1_E47_F         | 0.4119 | 0.2239 | 0.2761 | 0.0295 | 0.3276 | 0.0160 | 0.2355 | 0.0343 | 0.0000 | 0.0369 | 0.0191 | 0.2698 | 0.1358 | 0.0000 | 0.1810 | 0.1203 |
| TK1_P62_R         | 0.0595 | 0.0000 | 0.0030 | 0.0143 | 0.0115 | 0.0010 | 0.0080 | 0.0118 | 0.0000 | 0.0000 | 0.0122 | 0.1240 | 0.0657 | 0.0000 | 0.0000 | 0.4467 |
| TMEFF1_E180_R     | 0.0164 | 0.0000 | 0.0154 | 0.0000 | 0.0000 | 0.0000 | 0.0000 | 0.0000 | 0.0000 | 0.0070 | 0.0000 | 0.7845 | 0.0050 | 0.0000 | 0.0028 | 0.0060 |
| TMEFF1_P234_F     | 0.0000 | 0.0000 | 0.0000 | 0.0039 | 0.0067 | 0.9920 | 0.0000 | 0.0000 | 0.0000 | 0.0123 | 0.0000 | 0.0000 | 0.0000 | 0.0000 | 0.0000 | 0.0031 |
| TMEFF2_P152_R     | 0.3634 | 0.0486 | 0.1209 | 0.3543 | 0.1086 | 0.2994 | 0.0408 | 0.0525 | 0.2405 | 0.0750 | 0.3371 | 0.2895 | 0.2959 | 0.0838 | 0.0738 | 0.0280 |
| TMEFF2_P210_R     | 0.0000 | 0.0000 | 0.0000 | 0.0000 | 0.0000 | 0.0086 | 0.0000 | 0.0021 | 0.0000 | 0.0000 | 0.0000 | 0.0000 | 0.0000 | 0.0000 | 0.0000 | 0.0000 |
| TMEM63A_E63_F     | 0.0000 | 0.0000 | 0.0000 | 0.0023 | 0.0000 | 0.0000 | 0.0000 | 0.0000 | 0.0000 | 0.0000 | 0.0000 | 0.0079 | 0.0000 | 0.0000 | 0.0000 | 0.0023 |
| TMPRSS4_E83_F     | 0.0075 | 0.9945 | 0.7244 | 0.9896 | 0.9871 | 0.9934 | 0.4530 | 0.0215 | 0.9890 | 0.0000 | 0.0000 | 0.9908 | 0.9868 | 0.9809 | 0.9843 | 0.9917 |
| TMPRSS4_P552_F    | 0.5601 | 0.9941 | 0.9870 | 0.9892 | 0.8310 | 0.9918 | 0.7773 | 0.9781 | 0.9440 | 0.1106 | 0.0131 | 0.3590 | 0.6870 | 0.8653 | 0.8749 | 0.2831 |
| TNC_P198_F        | 0.0000 | 0.9636 | 0.0055 | 0.0000 | 0.0051 | 0.0000 | 0.0000 | 0.0043 | 0.0000 | 0.0000 | 0.0000 | 0.0000 | 0.0049 | 0.0000 | 0.0000 | 0.0000 |
| TNC_P57_F         | 0.4390 | 0.3426 | 0.0198 | 0.0099 | 0.0183 | 0.0117 | 0.0083 | 0.0074 | 0.0000 | 0.0174 | 0.5014 | 0.1363 | 0.2963 | 0.0000 | 0.0033 | 0.1892 |
| TNF_P1084_F       | 0.1840 | 0.4182 | 0.9916 | 0.9454 | 0.9882 | 0.9150 | 0.1212 | 0.9256 | 0.9927 | 0.2663 | 0.2031 | 0.9920 | 0.2678 | 0.9376 | 0.9840 | 0.4314 |
| TNF_P158_F        | 0.0000 | 0.0000 | 0.0000 | 0.0000 | 0.0000 | 0.0102 | 0.0000 | 0.0029 | 0.8797 | 0.0017 | 0.0000 | 0.0010 | 0.0000 | 0.0000 | 0.0000 | 0.0012 |
| TNFRSF10A_P171_F  | 0.0233 | 0.0043 | 0.0166 | 0.0178 | 0.0118 | 0.0121 | 0.0076 | 0.0117 | 0.0000 | 0.0237 | 0.0620 | 0.0079 | 0.1176 | 0.0000 | 0.0279 | 0.0092 |
| TNFRSF10A_P91_F   | 0.0144 | 0.0000 | 0.0000 | 0.0003 | 0.0000 | 0.0142 | 0.0118 | 0.0069 | 0.0000 | 0.0158 | 0.0000 | 0.0000 | 0.0000 | 0.0000 | 0.0000 | 0.0104 |
| TNFRSF10B_P108_R  | 0.0225 | 0.0863 | 0.0741 | 0.0149 | 0.0317 | 0.0100 | 0.0853 | 0.0367 | 0.0000 | 0.1143 | 0.0877 | 0.0948 | 0.0137 | 0.0131 | 0.6959 | 0.0876 |
| TNFRSF10C_E109_F  | 0.0112 | 0.3831 | 0.0067 | 0.0038 | 0.0560 | 0.0034 | 0.0026 | 0.2506 | 0.0000 | 0.0058 | 0.0311 | 0.0054 | 0.0044 | 0.0000 | 0.0048 | 0.0023 |
| TNFRSF10D_E27_F   | 0.0102 | 0.0075 | 0.0108 | 0.0058 | 0.0062 | 0.0043 | 0.0057 | 0.0067 | 0.0000 | 0.0440 | 0.0094 | 0.0044 | 0.0000 | 0.0000 | 0.0006 | 0.0035 |
| TNFRSF10D_P70_F   | 0.0304 | 0.0257 | 0.0744 | 0.0332 | 0.0379 | 0.0206 | 0.0115 | 0.0293 | 0.0000 | 0.0220 | 0.0540 | 0.0280 | 0.0109 | 0.0000 | 0.0268 | 0.1400 |
| TNFRSF1B_E5_F     | 0.0000 | 0.0000 | 0.0000 | 0.0000 | 0.0964 | 0.0096 | 0.0078 | 0.0145 | 0.0000 | 0.0000 | 0.0000 | 0.0000 | 0.0117 | 0.0000 | 0.0201 | 0.0000 |

|                   |        |        |        |        |        |        |        |        |        |        |        |        |        |        |        |        |        |
|-------------------|--------|--------|--------|--------|--------|--------|--------|--------|--------|--------|--------|--------|--------|--------|--------|--------|--------|
| TNFRSF1B_P167_F   | 0.0000 | 0.0055 | 0.0025 | 0.0000 | 0.0000 | 0.0000 | 0.0000 | 0.0000 | 0.0000 | 0.0000 | 0.0050 | 0.0139 | 0.0000 | 0.0027 | 0.0000 | 0.0000 | 0.0000 |
| TNFSF10_E53_F     | 0.0000 | 0.0000 | 0.0152 | 0.0174 | 0.0098 | 0.0151 | 0.0062 | 0.0073 | 0.0000 | 0.0000 | 0.7062 | 0.3279 | 0.5044 | 0.0000 | 0.0079 | 0.0000 | 0.0000 |
| TNFSF10_P2_R      | 0.0000 | 0.0000 | 0.0117 | 0.0000 | 0.0000 | 0.0000 | 0.0000 | 0.0000 | 0.0000 | 0.0000 | 0.0000 | 0.0000 | 0.0022 | 0.0000 | 0.0000 | 0.9715 | 0.0000 |
| TNFSF8_E258_R     | 0.0033 | 0.0000 | 0.5918 | 0.0000 | 0.0000 | 0.0050 | 0.6323 | 0.0023 | 0.5780 | 0.0050 | 0.0000 | 0.0041 | 0.0051 | 0.0000 | 0.0042 | 0.0019 | 0.0000 |
| TNFSF8_P184_F     | 0.0648 | 0.0055 | 0.0086 | 0.2981 | 0.0044 | 0.0009 | 0.0064 | 0.0052 | 0.0000 | 0.0000 | 0.0066 | 0.0063 | 0.0000 | 0.0000 | 0.0001 | 0.0040 | 0.0000 |
| TNK1_P41_R        | 0.0139 | 0.0110 | 0.6093 | 0.4697 | 0.0216 | 0.4336 | 0.0000 | 0.0205 | 0.0000 | 0.0326 | 0.1496 | 0.0126 | 0.0071 | 0.0000 | 0.0115 | 0.0000 | 0.0000 |
| TP73_E155_F       | 0.4938 | 0.0110 | 0.0196 | 0.4533 | 0.0242 | 0.7936 | 0.5282 | 0.0163 | 0.0000 | 0.4005 | 0.6473 | 0.0064 | 0.3052 | 0.0000 | 0.0207 | 0.2142 | 0.0000 |
| TP73_P496_F       | 0.0129 | 0.0000 | 0.0000 | 0.0000 | 0.0031 | 0.0000 | 0.0000 | 0.0083 | 0.0000 | 0.0000 | 0.0000 | 0.0040 | 0.0000 | 0.7636 | 0.0029 | 0.0000 | 0.0000 |
| TP73_P945_F       | 0.0130 | 0.0118 | 0.4040 | 0.0042 | 0.0151 | 0.0064 | 0.0000 | 0.0120 | 0.0000 | 0.0143 | 0.0046 | 0.0079 | 0.0000 | 0.2327 | 0.0136 | 0.0106 | 0.0000 |
| TPEF_seq_44_S36_F | 0.0057 | 0.1727 | 0.0187 | 0.0037 | 0.0028 | 0.0056 | 0.0000 | 0.0030 | 0.0000 | 0.0000 | 0.1162 | 0.0000 | 0.0000 | 0.0000 | 0.0022 | 0.0000 | 0.0000 |
| TPEF_seq_44_S88_R | 0.0120 | 0.0310 | 0.0156 | 0.0086 | 0.0166 | 0.0556 | 0.0286 | 0.0136 | 0.0000 | 0.0096 | 0.0132 | 0.0691 | 0.0085 | 0.0000 | 0.3864 | 0.0474 | 0.0000 |
| TRIM29_P261_F     | 0.8457 | 0.8202 | 0.0695 | 0.9882 | 0.9888 | 0.7362 | 0.9946 | 0.9771 | 0.0000 | 0.9959 | 0.8950 | 0.9909 | 0.8228 | 0.9708 | 0.9868 | 0.7532 | 0.0000 |
| TRIP6_E33_F       | 0.2808 | 0.0093 | 0.0153 | 0.0093 | 0.4023 | 0.0075 | 0.0931 | 0.0080 | 0.0000 | 0.2234 | 0.2621 | 0.0065 | 0.2566 | 0.0000 | 0.0157 | 0.1383 | 0.0000 |
| TSG101_P257_R     | 0.0091 | 0.0014 | 0.0000 | 0.0000 | 0.0037 | 0.0001 | 0.0000 | 0.0016 | 0.0000 | 0.0010 | 0.0089 | 0.0000 | 0.7819 | 0.0000 | 0.7919 | 0.0000 | 0.0000 |
| TUBB3_E91_F       | 0.0035 | 0.0027 | 0.0081 | 0.2838 | 0.2239 | 0.4327 | 0.4200 | 0.2412 | 0.2651 | 0.9632 | 0.0058 | 0.0000 | 0.0022 | 0.3601 | 0.5859 | 0.0000 | 0.0000 |
| TUBB3_P364_F      | 0.0000 | 0.0000 | 0.0000 | 0.0000 | 0.0000 | 0.0000 | 0.0000 | 0.0000 | 0.0000 | 0.0000 | 0.0000 | 0.0000 | 0.0000 | 0.0000 | 0.0000 | 0.0000 | 0.0062 |
| TUBB3_P721_R      | 0.0156 | 0.0000 | 0.0012 | 0.0029 | 0.0000 | 0.0000 | 0.0000 | 0.0059 | 0.0000 | 0.0053 | 0.0000 | 0.0000 | 0.0008 | 0.0000 | 0.0000 | 0.0000 | 0.0000 |
| TUSC3_E29_R       | 0.0455 | 0.1010 | 0.0098 | 0.0063 | 0.0055 | 0.0030 | 0.0058 | 0.0097 | 0.0000 | 0.0000 | 0.0000 | 0.0000 | 0.1286 | 0.3839 | 0.0082 | 0.1091 | 0.0000 |
| TUSC3_P85_R       | 0.0240 | 0.0000 | 0.0090 | 0.0034 | 0.1455 | 0.0108 | 0.0079 | 0.0075 | 0.0000 | 0.0163 | 0.0000 | 0.0057 | 0.0092 | 0.2216 | 0.2936 | 0.0034 | 0.0000 |
| TWIST1_E117_R     | 0.2409 | 0.0000 | 0.0056 | 0.0000 | 0.0000 | 0.0000 | 0.0000 | 0.0000 | 0.0000 | 0.0000 | 0.0000 | 0.0000 | 0.0000 | 0.0000 | 0.0000 | 0.0000 | 0.0005 |
| TWIST1_P355_R     | 0.0000 | 0.0000 | 0.0076 | 0.0057 | 0.0000 | 0.1601 | 0.0048 | 0.0060 | 0.0000 | 0.2682 | 0.0000 | 0.0026 | 0.0000 | 0.0000 | 0.0000 | 0.0000 | 0.0014 |
| TWIST1_P44_R      | 0.0000 | 0.0000 | 0.0000 | 0.0000 | 0.9589 | 0.0000 | 0.0000 | 0.0000 | 0.0000 | 0.0000 | 0.0000 | 0.0000 | 0.0000 | 0.0000 | 0.0000 | 0.0000 | 0.0000 |
| TYRO3_P501_F      | 0.0103 | 0.0000 | 0.0000 | 0.0000 | 0.0000 | 0.0000 | 0.0015 | 0.0000 | 0.0000 | 0.0000 | 0.0000 | 0.0000 | 0.0000 | 0.0000 | 0.0000 | 0.0000 | 0.0017 |
| UBA52_P293_R      | 0.0000 | 0.0000 | 0.0060 | 0.0000 | 0.0000 | 0.0000 | 0.0000 | 0.0041 | 0.0000 | 0.0000 | 0.0000 | 0.0050 | 0.0000 | 0.0000 | 0.0000 | 0.0000 | 0.0000 |
| UGT1A1_E11_F      | 0.9921 | 0.0000 | 0.9843 | 0.0000 | 0.9776 | 0.9917 | 0.0000 | 0.9869 | 0.9851 | 0.0052 | 0.0000 | 0.9885 | 0.9919 | 0.9695 | 0.9840 | 0.0000 | 0.0000 |
| UGT1A1_P564_R     | 0.5821 | 0.6318 | 0.9244 | 0.7174 | 0.7102 | 0.0812 | 0.9496 | 0.7633 | 0.9249 | 0.1607 | 0.9607 | 0.9083 | 0.9529 | 0.9507 | 0.9908 | 0.9467 | 0.0000 |
| UGT1A7_P751_R     | 0.9926 | 0.7625 | 0.9900 | 0.9934 | 0.9871 | 0.9520 | 0.9918 | 0.9910 | 0.9866 | 0.0000 | 0.0000 | 0.9913 | 0.8174 | 0.9821 | 0.9884 | 0.9873 | 0.0000 |
| UNG_P170_F        | 0.0229 | 0.0147 | 0.0244 | 0.4427 | 0.1185 | 0.0000 | 0.0098 | 0.0060 | 0.0000 | 0.0151 | 0.9955 | 0.0000 | 0.0068 | 0.3897 | 0.0000 | 0.0729 | 0.0000 |
| USP29_E274_F      | 0.0000 | 0.9953 | 0.8901 | 0.0000 | 0.9788 | 0.9907 | 0.9924 | 0.9048 | 0.8686 | 0.8872 | 0.0000 | 0.9918 | 0.9927 | 0.9708 | 0.9862 | 0.9933 | 0.0000 |
| USP29_P282_R      | 0.0000 | 0.9953 | 0.9845 | 0.0000 | 0.9880 | 0.9923 | 0.0016 | 0.9829 | 0.0000 | 0.0000 | 0.0000 | 0.0000 | 0.0000 | 0.9708 | 0.9851 | 0.9900 | 0.0000 |
| VAMP8_P114_F      | 0.0970 | 0.0159 | 0.0191 | 0.0112 | 0.1147 | 0.0060 | 0.1461 | 0.0179 | 0.0000 | 0.0063 | 0.0845 | 0.0094 | 0.1182 | 0.0056 | 0.0205 | 0.0084 | 0.0000 |
| VAV1_E9_F         | 0.0117 | 0.0073 | 0.0260 | 0.0000 | 0.0122 | 0.0051 | 0.0056 | 0.0103 | 0.0000 | 0.0000 | 0.0000 | 0.0077 | 0.0000 | 0.0000 | 0.0039 | 0.0000 | 0.0000 |
| VAV1_P317_F       | 0.0000 | 0.9919 | 0.0000 | 0.0000 | 0.0030 | 0.0000 | 0.0000 | 0.0048 | 0.0000 | 0.0000 | 0.0000 | 0.0000 | 0.0000 | 0.0000 | 0.5837 | 0.0000 | 0.0000 |

|                |        |        |        |        |        |        |        |        |        |        |        |        |        |        |        |        |
|----------------|--------|--------|--------|--------|--------|--------|--------|--------|--------|--------|--------|--------|--------|--------|--------|--------|
| VAV2_E58_F     | 0.1442 | 0.1796 | 0.0453 | 0.2345 | 0.0332 | 0.2005 | 0.0131 | 0.0255 | 0.0000 | 0.1618 | 0.2119 | 0.1685 | 0.0191 | 0.0350 | 0.0402 | 0.0612 |
| VAV2_P1182_F   | 0.0000 | 0.0819 | 0.0000 | 0.0000 | 0.0000 | 0.0009 | 0.0023 | 0.0010 | 0.0000 | 0.0000 | 0.0000 | 0.0012 | 0.0000 | 0.0000 | 0.0000 | 0.0000 |
| VBP1_P12_R     | 0.0000 | 0.9859 | 0.0092 | 0.0122 | 0.0032 | 0.0000 | 0.2196 | 0.5468 | 0.8144 | 0.0000 | 0.0000 | 0.0292 | 0.0000 | 0.0000 | 0.0000 | 0.0148 |
| VEGFB_P658_F   | 0.2015 | 0.0083 | 0.0132 | 0.0236 | 0.0083 | 0.0083 | 0.0256 | 0.0079 | 0.0000 | 0.0656 | 0.0000 | 0.0042 | 0.1498 | 0.0774 | 0.0064 | 0.0127 |
| VIM_P811_R     | 0.0000 | 0.0022 | 0.0000 | 0.0000 | 0.0000 | 0.0000 | 0.0032 | 0.0000 | 0.0000 | 0.0000 | 0.0000 | 0.0000 | 0.0000 | 0.0000 | 0.0000 | 0.0000 |
| WEE1_P924_R    | 0.0000 | 0.0072 | 0.0053 | 0.0000 | 0.9166 | 0.0014 | 0.9918 | 0.9348 | 0.5974 | 0.0039 | 0.9966 | 0.0000 | 0.0000 | 0.9108 | 0.9895 | 0.9402 |
| WNT2_E109_R    | 0.0000 | 0.0000 | 0.0000 | 0.0000 | 0.0000 | 0.0000 | 0.0000 | 0.0000 | 0.0000 | 0.0000 | 0.0000 | 0.0000 | 0.0000 | 0.0000 | 0.0000 | 0.0000 |
| WNT2_P217_F    | 0.0244 | 0.0319 | 0.0333 | 0.8473 | 0.0338 | 0.0543 | 0.0275 | 0.0381 | 0.0000 | 0.0170 | 0.2459 | 0.0331 | 0.0227 | 0.0305 | 0.0461 | 0.0223 |
| WNT2B_P1185_R  | 0.0223 | 0.1102 | 0.0223 | 0.0103 | 0.0341 | 0.0093 | 0.0164 | 0.0238 | 0.0000 | 0.0361 | 0.0101 | 0.0315 | 0.0000 | 0.0000 | 0.0245 | 0.3611 |
| WNT5A_E43_F    | 0.2819 | 0.0301 | 0.0708 | 0.0109 | 0.0164 | 0.3625 | 0.0537 | 0.0152 | 0.0000 | 0.0169 | 0.2485 | 0.1297 | 0.0170 | 0.0018 | 0.0185 | 0.0127 |
| WNT5A_P655_F   | 0.0947 | 0.0000 | 0.1266 | 0.0068 | 0.0000 | 0.0000 | 0.0000 | 0.0076 | 0.0000 | 0.0000 | 0.0000 | 0.0040 | 0.0000 | 0.0000 | 0.0004 | 0.0000 |
| WNT8B_E487_F   | 0.6735 | 0.4500 | 0.9833 | 0.9869 | 0.0709 | 0.5256 | 0.9890 | 0.9798 | 0.9872 | 0.2790 | 0.7894 | 0.0396 | 0.0134 | 0.0000 | 0.9766 | 0.4519 |
| WNT8B_P216_R   | 0.9927 | 0.9925 | 0.9774 | 0.9899 | 0.0000 | 0.9913 | 0.0000 | 0.9864 | 0.9861 | 0.0000 | 0.0000 | 0.9902 | 0.9910 | 0.9872 | 0.9832 | 0.9731 |
| WRN_E57_F      | 0.2302 | 0.3034 | 0.0240 | 0.0085 | 0.2294 | 0.4447 | 0.2726 | 0.0439 | 0.0000 | 0.2343 | 0.2415 | 0.2859 | 0.2907 | 0.0078 | 0.0338 | 0.0106 |
| WRN_P969_F     | 0.0167 | 0.0060 | 0.7322 | 0.0000 | 0.0000 | 0.0000 | 0.9877 | 0.9816 | 0.0000 | 0.0061 | 0.0000 | 0.0000 | 0.0000 | 0.9221 | 0.9298 | 0.9929 |
| WT1_E32_F      | 0.0000 | 0.0000 | 0.0201 | 0.0000 | 0.1842 | 0.3945 | 0.0000 | 0.0189 | 0.0000 | 0.0000 | 0.0000 | 0.1249 | 0.0000 | 0.0000 | 0.0000 | 0.0065 |
| WT1_P853_F     | 0.2621 | 0.0056 | 0.0029 | 0.0065 | 0.0000 | 0.0060 | 0.0000 | 0.0000 | 0.0000 | 0.0075 | 0.0000 | 0.0000 | 0.0064 | 0.0000 | 0.0000 | 0.0000 |
| XRCC1_P681_R   | 0.9945 | 0.2361 | 0.9848 | 0.9896 | 0.9303 | 0.9907 | 0.8104 | 0.9544 | 0.9876 | 0.9962 | 0.8728 | 0.0000 | 0.9929 | 0.9298 | 0.9808 | 0.9900 |
| XRCC2_P1077_F  | 0.0000 | 0.0000 | 0.0000 | 0.9887 | 0.9872 | 0.0000 | 0.9908 | 0.9878 | 0.9921 | 0.0000 | 0.9946 | 0.9903 | 0.9956 | 0.9906 | 0.9801 | 0.9918 |
| YES1_P600_F    | 0.0114 | 0.0060 | 0.0217 | 0.0100 | 0.1704 | 0.0070 | 0.0056 | 0.0155 | 0.0000 | 0.1513 | 0.0000 | 0.0104 | 0.0074 | 0.0063 | 0.0134 | 0.0096 |
| ZIM3_E203_F    | 0.9946 | 0.0000 | 0.9891 | 0.9888 | 0.9867 | 0.0000 | 0.0000 | 0.9152 | 0.0000 | 0.0000 | 0.0000 | 0.0000 | 0.0000 | 0.9822 | 0.9840 | 0.0000 |
| ZIM3_P451_R    | 0.0205 | 0.9931 | 0.9894 | 0.9913 | 0.9538 | 0.9921 | 0.9637 | 0.6068 | 0.7328 | 0.0000 | 0.9960 | 0.9896 | 0.1465 | 0.9794 | 0.9875 | 0.9889 |
| ZIM3_P718_R    | 0.0000 | 0.0000 | 0.9790 | 0.9920 | 0.9913 | 0.9908 | 0.9900 | 0.9902 | 0.9850 | 0.0000 | 0.7959 | 0.9909 | 0.0000 | 0.0000 | 0.9778 | 0.9929 |
| ZMYND10_E77_R  | 0.0084 | 0.0000 | 0.0013 | 0.0000 | 0.0000 | 0.0000 | 0.0000 | 0.0010 | 0.0000 | 0.0000 | 0.0000 | 0.0000 | 0.0004 | 0.0000 | 0.0000 | 0.0000 |
| ZNF215_P71_R   | 0.9628 | 0.0076 | 0.0125 | 0.0068 | 0.0085 | 0.0050 | 0.0016 | 0.0100 | 0.0000 | 0.9841 | 0.0109 | 0.9914 | 0.0066 | 0.2098 | 0.0067 | 0.0063 |
| ZNF264_E48_R   | 0.0000 | 0.0000 | 0.0000 | 0.0000 | 0.0000 | 0.0000 | 0.0000 | 0.0000 | 0.0000 | 0.0000 | 0.0000 | 0.0000 | 0.0056 | 0.0000 | 0.0000 | 0.0000 |
| ZNFN1A1_E102_F | 0.0000 | 0.6998 | 0.4648 | 0.0261 | 0.0000 | 0.5234 | 0.6601 | 0.8674 | 0.9250 | 0.9921 | 0.0000 | 0.0050 | 0.1738 | 0.8564 | 0.9774 | 0.5540 |
| ZNFN1A1_P179_F | 0.0164 | 0.9939 | 0.9886 | 0.0000 | 0.9925 | 0.9920 | 0.9898 | 0.9893 | 0.0000 | 0.0000 | 0.9885 | 0.9891 | 0.0000 | 0.9894 | 0.9812 | 0.9901 |

| TargetID        | BWS22  |        |        |        |        |        |        |        |        |        |        |        |        |        |        |
|-----------------|--------|--------|--------|--------|--------|--------|--------|--------|--------|--------|--------|--------|--------|--------|--------|
|                 | BWS17  | BWS18  | BWS19  | BWS20  | BWS21  | (ART)  | BWS23  | BWS24  | BWS25  | BWS26  | BWS27  | BWS28  | BWS29  | BWS30  | BWS31  |
| AATK_E63_R      | 0.0101 | 0.6964 | 0.9839 | 0.1008 | 0.0065 | 0.9939 | 0.9948 | 0.9903 | 0.9629 | 0.8605 | 0.9885 | 0.0163 | 0.9850 | 0.9923 | 0.0000 |
| ABCA1_E120_R    | 0.9945 | 0.3238 | 0.9838 | 0.0000 | 0.9888 | 0.9927 | 0.0000 | 0.9349 | 0.9868 | 0.9724 | 0.9867 | 0.9914 | 0.9817 | 0.0000 | 0.0000 |
| ABCA1_P45_F     | 0.0000 | 0.2495 | 0.9804 | 0.0000 | 0.0000 | 0.0000 | 0.9893 | 0.0000 | 0.9863 | 0.9833 | 0.9746 | 0.9801 | 0.9790 | 0.8898 | 0.9647 |
| ABCB4_E429_F    | 0.0000 | 0.0000 | 0.0027 | 0.0052 | 0.0061 | 0.0028 | 0.0026 | 0.0066 | 0.0000 | 0.0000 | 0.0063 | 0.0026 | 0.0000 | 0.0076 | 0.1257 |
| ABCC2_P88_F     | 0.9870 | 0.0000 | 0.1586 | 0.1568 | 0.0155 | 0.2469 | 0.3028 | 0.1015 | 0.1071 | 0.0000 | 0.6270 | 0.0165 | 0.1655 | 0.0000 | 0.0129 |
| ABCC5_P444_F    | 0.1765 | 0.0000 | 0.1439 | 0.0072 | 0.0068 | 0.0096 | 0.0706 | 0.0046 | 0.0000 | 0.0000 | 0.0115 | 0.0793 | 0.1675 | 0.0154 | 0.0575 |
| ABCG2_P178_R    | 0.3504 | 0.1567 | 0.0881 | 0.5453 | 0.0336 | 0.0461 | 0.0522 | 0.3358 | 0.8629 | 0.8621 | 0.0437 | 0.0200 | 0.0241 | 0.1164 | 0.0363 |
| ABCG2_P310_R    | 0.0000 | 0.4280 | 0.9805 | 0.9904 | 0.0000 | 0.0000 | 0.0000 | 0.0000 | 0.9715 | 0.9895 | 0.9881 | 0.7614 | 0.9825 | 0.0000 | 0.9889 |
| ABL1_P53_F      | 0.9795 | 0.1762 | 0.9851 | 0.9903 | 0.2485 | 0.1968 | 0.9887 | 0.9744 | 0.9887 | 0.7561 | 0.9875 | 0.9503 | 0.9819 | 0.7783 | 0.2948 |
| ABL2_P459_R     | 0.0000 | 0.0000 | 0.0000 | 0.0000 | 0.0075 | 0.0040 | 0.0000 | 0.0000 | 0.0000 | 0.0000 | 0.0000 | 0.0000 | 0.0000 | 0.0000 | 0.0000 |
| ABO_E110_F      | 0.1854 | 0.4281 | 0.0787 | 0.0927 | 0.0056 | 0.0068 | 0.0081 | 0.0073 | 0.3208 | 0.0000 | 0.0099 | 0.0095 | 0.1290 | 0.0588 | 0.0053 |
| ABO_P312_F      | 0.0214 | 0.0000 | 0.1284 | 0.0125 | 0.1580 | 0.0084 | 0.0605 | 0.0000 | 0.0000 | 0.0000 | 0.3753 | 0.0118 | 0.1454 | 0.0107 | 0.0053 |
| ACTG2_P455_R    | 0.0065 | 0.0000 | 0.0000 | 0.0000 | 0.0000 | 0.0002 | 0.0056 | 0.0000 | 0.0000 | 0.0000 | 0.0040 | 0.0000 | 0.0000 | 0.0000 | 0.0000 |
| ACVR1_P983_F    | 0.0000 | 0.0000 | 0.0070 | 0.0000 | 0.0016 | 0.0000 | 0.0000 | 0.0000 | 0.0000 | 0.0000 | 0.0041 | 0.0017 | 0.0000 | 0.0056 | 0.0000 |
| ACVR1B_E497_R   | 0.0000 | 0.0000 | 0.0058 | 0.0678 | 0.0000 | 0.0130 | 0.1474 | 0.1020 | 0.0000 | 0.0000 | 0.0054 | 0.0005 | 0.0000 | 0.0000 | 0.0119 |
| ACVR1B_P572_R   | 0.2493 | 0.0876 | 0.0594 | 0.3387 | 0.0133 | 0.3934 | 0.4164 | 0.0085 | 0.0000 | 0.0000 | 0.0164 | 0.3242 | 0.1511 | 0.7859 | 0.3864 |
| ACVR1C_P115_R   | 0.0000 | 0.0000 | 0.0000 | 0.0000 | 0.0000 | 0.0015 | 0.0082 | 0.0006 | 0.0000 | 0.0000 | 0.2579 | 0.0000 | 0.0815 | 0.0000 | 0.0063 |
| ACVR1C_P363_F   | 0.2548 | 0.6438 | 0.9845 | 0.0000 | 0.0000 | 0.8625 | 0.0000 | 0.9418 | 0.9824 | 0.9874 | 0.9528 | 0.0569 | 0.9834 | 0.9933 | 0.0012 |
| ACVR2B_E27_R    | 0.8057 | 0.0000 | 0.9802 | 0.8234 | 0.0000 | 0.1489 | 0.7057 | 0.6354 | 0.9840 | 0.9176 | 0.9673 | 0.9885 | 0.9711 | 0.0000 | 0.9896 |
| ACVR2B_P676_F   | 0.0000 | 0.0990 | 0.0351 | 0.1209 | 0.0062 | 0.0000 | 0.0000 | 0.0000 | 0.0000 | 0.0000 | 0.0000 | 0.0000 | 0.0000 | 0.0000 | 0.0884 |
| ADAMTS12_P250_R | 0.0000 | 0.0000 | 0.0013 | 0.0000 | 0.0000 | 0.0025 | 0.0000 | 0.0000 | 0.0000 | 0.0000 | 0.0431 | 0.0000 | 0.0000 | 0.0000 | 0.0021 |
| ADCYAP1_E163_R  | 0.2169 | 0.0000 | 0.0078 | 0.0000 | 0.0522 | 0.0000 | 0.0000 | 0.0100 | 0.0000 | 0.0000 | 0.0075 | 0.0052 | 0.0000 | 0.0000 | 0.0064 |
| ADCYAP1_P398_F  | 0.9935 | 0.9424 | 0.9743 | 0.9722 | 0.9621 | 0.9934 | 0.2934 | 0.9391 | 0.9852 | 0.8786 | 0.8375 | 0.1350 | 0.9754 | 0.9829 | 0.9217 |
| ADCYAP1_P455_R  | 0.0134 | 0.0156 | 0.0196 | 0.2752 | 0.2009 | 0.6679 | 0.1625 | 0.1716 | 0.0223 | 0.0047 | 0.0244 | 0.0529 | 0.0160 | 0.0152 | 0.0855 |
| AFF3_P122_F     | 0.0000 | 0.6458 | 0.0722 | 0.0183 | 0.0000 | 0.0037 | 0.0000 | 0.0062 | 0.1800 | 0.0000 | 0.0073 | 0.0048 | 0.0895 | 0.0732 | 0.0000 |
| AFF3_P808_F     | 0.0000 | 0.0000 | 0.0031 | 0.1489 | 0.3443 | 0.0008 | 0.0000 | 0.0000 | 0.0000 | 0.0000 | 0.3076 | 0.0000 | 0.1090 | 0.0000 | 0.0000 |
| AFP_P824_F      | 0.1641 | 0.0000 | 0.0128 | 0.3700 | 0.3790 | 0.0100 | 0.0098 | 0.0836 | 0.0000 | 0.3928 | 0.3115 | 0.0089 | 0.1630 | 0.3639 | 0.3199 |
| AGTR1_P154_F    | 0.0000 | 0.0000 | 0.0000 | 0.0000 | 0.0000 | 0.0000 | 0.0000 | 0.0000 | 0.0000 | 0.0000 | 0.0000 | 0.0000 | 0.0000 | 0.0077 | 0.0000 |
| AGTR1_P41_F     | 0.4471 | 0.8498 | 0.0137 | 0.6487 | 0.4639 | 0.3509 | 0.4604 | 0.4579 | 0.0000 | 0.0000 | 0.0247 | 0.0161 | 0.0129 | 0.1867 | 0.0133 |
| AHR_E103_F      | 0.0000 | 0.0000 | 0.9710 | 0.0000 | 0.0000 | 0.0000 | 0.9916 | 0.0000 | 0.9758 | 0.9638 | 0.9159 | 0.0000 | 0.9771 | 0.0000 | 0.0000 |
| AHR_P166_R      | 0.7627 | 0.5725 | 0.8372 | 0.5873 | 0.6192 | 0.7196 | 0.7159 | 0.6597 | 0.7648 | 0.8392 | 0.6782 | 0.8828 | 0.7429 | 0.0104 | 0.0041 |

|                |        |        |        |        |        |        |        |        |        |        |        |        |        |        |        |
|----------------|--------|--------|--------|--------|--------|--------|--------|--------|--------|--------|--------|--------|--------|--------|--------|
| AIM2_E208_F    | 0.0000 | 0.0000 | 0.0109 | 0.0000 | 0.0110 | 0.0051 | 0.0000 | 0.2319 | 0.0000 | 0.0000 | 0.0156 | 0.0206 | 0.0494 | 0.0166 | 0.0092 |
| AKT1_P310_R    | 0.0000 | 0.0000 | 0.3053 | 0.0083 | 0.0078 | 0.0029 | 0.0000 | 0.0000 | 0.9675 | 0.4274 | 0.0167 | 0.0094 | 0.3461 | 0.0000 | 0.0037 |
| ALK_P28_F      | 0.0101 | 0.0000 | 0.3078 | 0.0132 | 0.0082 | 0.0099 | 0.0104 | 0.0027 | 0.0000 | 0.3810 | 0.1410 | 0.0000 | 0.3118 | 0.0552 | 0.7872 |
| ALOX12_E85_R   | 0.0000 | 0.0000 | 0.0000 | 0.0059 | 0.0000 | 0.0000 | 0.0000 | 0.0000 | 0.0000 | 0.0000 | 0.4217 | 0.0005 | 0.0000 | 0.0064 | 0.0022 |
| ALOX12_P223_R  | 0.9120 | 0.0000 | 0.9774 | 0.0000 | 0.0000 | 0.0000 | 0.0088 | 0.0000 | 0.9804 | 0.0000 | 0.0000 | 0.3904 | 0.9737 | 0.0000 | 0.9875 |
| APBA1_E99_R    | 0.0000 | 0.0000 | 0.0000 | 0.0000 | 0.0000 | 0.0000 | 0.0000 | 0.0000 | 0.0000 | 0.0000 | 0.0000 | 0.0000 | 0.8056 | 0.0000 | 0.0000 |
| APBA1_P644_F   | 0.0000 | 0.0000 | 0.0000 | 0.0000 | 0.0000 | 0.0000 | 0.0000 | 0.0000 | 0.0000 | 0.0000 | 0.0000 | 0.0000 | 0.9373 | 0.0000 | 0.0000 |
| APBA2_P227_F   | 0.0000 | 0.0000 | 0.0071 | 0.0000 | 0.0000 | 0.0000 | 0.0805 | 0.0000 | 0.0000 | 0.0000 | 0.0000 | 0.0050 | 0.0606 | 0.0000 | 0.0037 |
| APC_P280_R     | 0.9942 | 0.0000 | 0.9798 | 0.0000 | 0.0000 | 0.0000 | 0.0000 | 0.0000 | 0.0000 | 0.0000 | 0.9738 | 0.0000 | 0.9780 | 0.0000 | 0.3678 |
| APOA1_P75_F    | 0.0099 | 0.4090 | 0.4401 | 0.1397 | 0.0172 | 0.0000 | 0.0000 | 0.0513 | 0.0000 | 0.0000 | 0.0058 | 0.0000 | 0.0000 | 0.0000 | 0.0000 |
| APOC1_P406_R   | 0.0527 | 0.5728 | 0.0395 | 0.0090 | 0.0000 | 0.0065 | 0.0464 | 0.0034 | 0.4566 | 0.0000 | 0.1520 | 0.4935 | 0.1158 | 0.0049 | 0.7388 |
| APP_E8_F       | 0.0000 | 0.3604 | 0.0038 | 0.0000 | 0.0037 | 0.0019 | 0.0000 | 0.0000 | 0.0000 | 0.0000 | 0.0000 | 0.0000 | 0.0000 | 0.0456 | 0.0027 |
| APP_P179_R     | 0.0224 | 0.0000 | 0.0180 | 0.5288 | 0.0822 | 0.4714 | 0.0249 | 0.6333 | 0.0000 | 0.0000 | 0.0427 | 0.0230 | 0.0156 | 0.5991 | 0.0082 |
| AR_P189_R      | 0.0000 | 0.0000 | 0.1847 | 0.1957 | 0.1180 | 0.0476 | 0.1661 | 0.0085 | 0.0000 | 0.0000 | 0.1911 | 0.0090 | 0.3677 | 0.0000 | 0.0074 |
| AREG_E25_F     | 0.0000 | 0.0000 | 0.0000 | 0.0087 | 0.0000 | 0.0000 | 0.0000 | 0.0000 | 0.0000 | 0.0000 | 0.0000 | 0.0010 | 0.0000 | 0.0026 | 0.0046 |
| ARHGDI1_P148_R | 0.2599 | 0.0088 | 0.0343 | 0.0205 | 0.0153 | 0.0195 | 0.2025 | 0.0120 | 0.0097 | 0.0186 | 0.0286 | 0.0454 | 0.0247 | 0.0168 | 0.0183 |
| ARNT_P238_R    | 0.0000 | 0.0000 | 0.0084 | 0.3681 | 0.0000 | 0.0080 | 0.0067 | 0.3125 | 0.0000 | 0.0000 | 0.0074 | 0.3073 | 0.0000 | 0.0000 | 0.0035 |
| ASB4_P391_F    | 0.0000 | 0.0000 | 0.0062 | 0.0108 | 0.0055 | 0.0000 | 0.0000 | 0.0000 | 0.0000 | 0.0000 | 0.0048 | 0.0079 | 0.0000 | 0.0000 | 0.0061 |
| ASB4_P52_R     | 0.0000 | 0.0000 | 0.0041 | 0.0000 | 0.0000 | 0.0000 | 0.0000 | 0.0000 | 0.0000 | 0.0000 | 0.0096 | 0.0000 | 0.0513 | 0.0000 | 0.0000 |
| ASCL1_E24_F    | 0.0000 | 0.0000 | 0.0000 | 0.0087 | 0.0093 | 0.0000 | 0.0076 | 0.0000 | 0.0000 | 0.0000 | 0.0000 | 0.0000 | 0.0000 | 0.0000 | 0.0000 |
| ASCL1_P747_F   | 0.0000 | 0.0000 | 0.1647 | 0.0000 | 0.0043 | 0.1833 | 0.0063 | 0.0798 | 0.0000 | 0.0000 | 0.1264 | 0.1082 | 0.0000 | 0.9879 | 0.0999 |
| ASCL2_E76_R    | 0.0013 | 0.0000 | 0.0000 | 0.0068 | 0.0040 | 0.0007 | 0.0020 | 0.0028 | 0.0000 | 0.0000 | 0.0015 | 0.0000 | 0.0000 | 0.0049 | 0.0000 |
| ASCL2_P360_F   | 0.0000 | 0.0000 | 0.2382 | 0.0000 | 0.0000 | 0.9913 | 0.0000 | 0.0037 | 0.0000 | 0.0000 | 0.0000 | 0.0000 | 0.0699 | 0.0000 | 0.0000 |
| ASCL2_P609_R   | 0.0210 | 0.0000 | 0.0000 | 0.0000 | 0.0000 | 0.0000 | 0.0000 | 0.0000 | 0.0000 | 0.0000 | 0.0000 | 0.0000 | 0.0000 | 0.0000 | 0.0000 |
| ATP10A_P147_F  | 0.0119 | 0.0000 | 0.6184 | 0.0098 | 0.0086 | 0.0027 | 0.0000 | 0.0000 | 0.9635 | 0.0000 | 0.0193 | 0.0110 | 0.0391 | 0.0329 | 0.0108 |
| ATP10A_P524_R  | 0.1486 | 0.3948 | 0.0093 | 0.1439 | 0.0094 | 0.1947 | 0.0365 | 0.0134 | 0.0000 | 0.0000 | 0.0165 | 0.0094 | 0.0000 | 0.0108 | 0.0127 |
| AXIN1_P995_R   | 0.6950 | 0.7859 | 0.0183 | 0.6701 | 0.5319 | 0.3914 | 0.0172 | 0.0091 | 0.0000 | 0.0000 | 0.0133 | 0.3956 | 0.0086 | 0.0424 | 0.0136 |
| AXL_E61_F      | 0.0000 | 0.0000 | 0.0000 | 0.0000 | 0.0000 | 0.0027 | 0.0034 | 0.0042 | 0.0000 | 0.0000 | 0.0056 | 0.0035 | 0.0000 | 0.0097 | 0.0017 |
| BAX_E281_R     | 0.0264 | 0.0000 | 0.0118 | 0.0929 | 0.1576 | 0.0348 | 0.3376 | 0.4254 | 0.0000 | 0.0000 | 0.0204 | 0.0201 | 0.0089 | 0.0251 | 0.4769 |
| BCAM_E100_R    | 0.0823 | 0.0000 | 0.0098 | 0.2370 | 0.1552 | 0.0042 | 0.0087 | 0.0740 | 0.0000 | 0.0000 | 0.0546 | 0.0078 | 0.0973 | 0.0000 | 0.0080 |
| BCAM_P205_F    | 0.0086 | 0.0000 | 0.2380 | 0.5555 | 0.5187 | 0.0000 | 0.0000 | 0.0079 | 0.0000 | 0.0000 | 0.9055 | 0.3355 | 0.0060 | 0.0135 | 0.3842 |
| BCAP31_P1131_F | 0.7257 | 0.9349 | 0.0129 | 0.8238 | 0.0201 | 0.0245 | 0.7263 | 0.6642 | 0.0000 | 0.0000 | 0.0167 | 0.0216 | 0.0111 | 0.0462 | 0.0219 |
| BCL2L2_E172_F  | 0.0840 | 0.0000 | 0.0000 | 0.0030 | 0.0049 | 0.0000 | 0.0000 | 0.0000 | 0.0000 | 0.0000 | 0.0061 | 0.0018 | 0.0000 | 0.0000 | 0.0000 |

|                 |        |        |        |        |        |        |        |        |        |        |        |        |        |        |        |
|-----------------|--------|--------|--------|--------|--------|--------|--------|--------|--------|--------|--------|--------|--------|--------|--------|
| BCL2L2_P280_F   | 0.1205 | 0.0000 | 0.0064 | 0.0075 | 0.0000 | 0.0051 | 0.0000 | 0.0059 | 0.0000 | 0.0000 | 0.0086 | 0.0055 | 0.0000 | 0.0000 | 0.0032 |
| BCL3_E71_F      | 0.0059 | 0.0000 | 0.0020 | 0.0060 | 0.0051 | 0.0000 | 0.0062 | 0.9940 | 0.0000 | 0.0000 | 0.0053 | 0.0023 | 0.0000 | 0.0073 | 0.0033 |
| BCL3_P1038_R    | 0.3268 | 0.1364 | 0.1581 | 0.0114 | 0.0074 | 0.0147 | 0.3557 | 0.0052 | 0.0000 | 0.0000 | 0.0128 | 0.1313 | 0.0009 | 0.0142 | 0.3221 |
| BCL6_P248_R     | 0.0000 | 0.0000 | 0.0058 | 0.0000 | 0.0057 | 0.0113 | 0.0000 | 0.0000 | 0.0000 | 0.0000 | 0.7928 | 0.0000 | 0.0000 | 0.0140 | 0.0001 |
| BDNF_E19_R      | 0.0073 | 0.0000 | 0.0319 | 0.0080 | 0.0061 | 0.0037 | 0.0057 | 0.0031 | 0.0154 | 0.0000 | 0.0142 | 0.0889 | 0.0191 | 0.0108 | 0.0042 |
| BDNF_P259_R     | 0.7240 | 0.8848 | 0.9841 | 0.9955 | 0.9943 | 0.0204 | 0.5937 | 0.9925 | 0.9892 | 0.9914 | 0.9742 | 0.9878 | 0.9825 | 0.9929 | 0.9911 |
| BGN_E282_R      | 0.0095 | 0.0140 | 0.0081 | 0.0000 | 0.0000 | 0.0021 | 0.0000 | 0.0028 | 0.0000 | 0.0000 | 0.0069 | 0.9889 | 0.0000 | 0.0000 | 0.0017 |
| BGN_P333_R      | 0.0131 | 0.7215 | 0.3188 | 0.3778 | 0.0473 | 0.0076 | 0.3496 | 0.0096 | 0.0023 | 0.4913 | 0.0123 | 0.0024 | 0.0419 | 0.0150 | 0.0000 |
| BIRC4_P122_R    | 0.2382 | 0.0000 | 0.0995 | 0.1622 | 0.0123 | 0.4493 | 0.3635 | 0.0102 | 0.0000 | 0.2386 | 0.0165 | 0.3824 | 0.2008 | 0.0608 | 0.2712 |
| BIRC5_E89_F     | 0.1175 | 0.0000 | 0.0161 | 0.0968 | 0.0787 | 0.0164 | 0.0751 | 0.0703 | 0.0000 | 0.0000 | 0.0123 | 0.0173 | 0.0066 | 0.0674 | 0.0935 |
| BLK_P14_F       | 0.2761 | 0.0000 | 0.0089 | 0.1128 | 0.2706 | 0.0082 | 0.1829 | 0.0063 | 0.0000 | 0.0000 | 0.0114 | 0.2594 | 0.0006 | 0.0000 | 0.0105 |
| BMP2_E48_R      | 0.3961 | 0.7606 | 0.1765 | 0.5722 | 0.4225 | 0.3412 | 0.9084 | 0.3037 | 0.4751 | 0.0000 | 0.0097 | 0.0087 | 0.0000 | 0.7042 | 0.2992 |
| BMP2_P1201_F    | 0.0000 | 0.0000 | 0.0005 | 0.0000 | 0.0000 | 0.0000 | 0.0050 | 0.0000 | 0.0000 | 0.0000 | 0.0031 | 0.0000 | 0.1674 | 0.0000 | 0.0036 |
| BMP3_E147_F     | 0.0096 | 0.0000 | 0.0000 | 0.0000 | 0.0000 | 0.0000 | 0.0000 | 0.0000 | 0.0000 | 0.0000 | 0.0005 | 0.0000 | 0.0000 | 0.0000 | 0.0004 |
| BMP3_P56_R      | 0.0000 | 0.0000 | 0.0034 | 0.0000 | 0.0000 | 0.0000 | 0.0000 | 0.0000 | 0.0000 | 0.0000 | 0.0044 | 0.0038 | 0.0000 | 0.0000 | 0.0010 |
| BMP4_P199_R     | 0.0924 | 0.0000 | 0.2157 | 0.0335 | 0.0118 | 0.9904 | 0.0989 | 0.1247 | 0.0000 | 0.9472 | 0.5509 | 0.9812 | 0.4898 | 0.3894 | 0.1115 |
| BMP6_P398_F     | 0.9946 | 0.4310 | 0.9832 | 0.9960 | 0.0000 | 0.9951 | 0.0123 | 0.9947 | 0.9913 | 0.9840 | 0.9866 | 0.9835 | 0.9825 | 0.0046 | 0.9920 |
| BMPR1A_P956_F   | 0.1035 | 0.0000 | 0.0122 | 0.0000 | 0.1177 | 0.0081 | 0.1406 | 0.0057 | 0.0000 | 0.2813 | 0.0130 | 0.0189 | 0.0044 | 0.0178 | 0.0098 |
| BMPR2_E435_F    | 0.0000 | 0.0000 | 0.0000 | 0.0000 | 0.0000 | 0.0000 | 0.0000 | 0.0316 | 0.0000 | 0.0000 | 0.0000 | 0.0000 | 0.0000 | 0.0116 | 0.0000 |
| BMPR2_P1271_F   | 0.1217 | 0.0000 | 0.0539 | 0.0000 | 0.0389 | 0.0069 | 0.0000 | 0.0012 | 0.0139 | 0.0000 | 0.0107 | 0.0053 | 0.0053 | 0.0000 | 0.0022 |
| BSG_P211_R      | 0.0556 | 0.1968 | 0.0651 | 0.1300 | 0.4711 | 0.1105 | 0.1743 | 0.3777 | 0.4018 | 0.0516 | 0.0724 | 0.0887 | 0.0647 | 0.6879 | 0.1124 |
| BTK_P105_F      | 0.1152 | 0.0000 | 0.0944 | 0.0078 | 0.0146 | 0.1629 | 0.1897 | 0.0078 | 0.0015 | 0.0000 | 0.0698 | 0.0105 | 0.0072 | 0.0092 | 0.0066 |
| C20orf47_P225_R | 0.0000 | 0.1185 | 0.0028 | 0.0119 | 0.0027 | 0.0000 | 0.0000 | 0.0000 | 0.0000 | 0.0000 | 0.0085 | 0.0075 | 0.0077 | 0.9132 | 0.0017 |
| CALCA_E174_R    | 0.5620 | 0.3284 | 0.0352 | 0.7037 | 0.6612 | 0.6725 | 0.0898 | 0.5639 | 0.0574 | 0.1007 | 0.5349 | 0.0916 | 0.0735 | 0.2423 | 0.6058 |
| CAPG_E228_F     | 0.0077 | 0.0000 | 0.0302 | 0.0000 | 0.0026 | 0.0000 | 0.0024 | 0.0069 | 0.1591 | 0.0000 | 0.2244 | 0.0003 | 0.0260 | 0.0060 | 0.0000 |
| CASP10_E139_F   | 0.0119 | 0.7874 | 0.0055 | 0.2880 | 0.1136 | 0.0050 | 0.0059 | 0.0000 | 0.0000 | 0.0000 | 0.0056 | 0.7046 | 0.0000 | 0.0129 | 0.0000 |
| CASP10_P186_F   | 0.2407 | 0.4303 | 0.8020 | 0.0000 | 0.3756 | 0.0000 | 0.0654 | 0.0000 | 0.9800 | 0.6282 | 0.9836 | 0.8383 | 0.9737 | 0.9883 | 0.0000 |
| CASP2_P192_F    | 0.3269 | 0.1255 | 0.0248 | 0.5553 | 0.0495 | 0.0241 | 0.0338 | 0.0288 | 0.0114 | 0.3629 | 0.0194 | 0.0424 | 0.0216 | 0.0940 | 0.0520 |
| CASP3_P420_R    | 0.0093 | 0.0000 | 0.0838 | 0.0000 | 0.0037 | 0.0038 | 0.0000 | 0.0000 | 0.0000 | 0.0000 | 0.0137 | 0.0030 | 0.0000 | 0.0023 | 0.0000 |
| CASP6_P201_F    | 0.0000 | 0.3955 | 0.3682 | 0.9902 | 0.0000 | 0.0122 | 0.0268 | 0.0074 | 0.7391 | 0.0000 | 0.0184 | 0.3395 | 0.5615 | 0.0000 | 0.0118 |
| CASP6_P230_R    | 0.0486 | 0.0000 | 0.2862 | 0.0091 | 0.0087 | 0.8771 | 0.0037 | 0.0057 | 0.0000 | 0.7997 | 0.0113 | 0.1710 | 0.0037 | 0.0148 | 0.0280 |
| CAV1_P130_R     | 0.3598 | 0.1072 | 0.3237 | 0.4466 | 0.2756 | 0.0120 | 0.2494 | 0.0201 | 0.9346 | 0.0000 | 0.0074 | 0.9886 | 0.1839 | 0.3398 | 0.0087 |
| CAV1_P169_F     | 0.1560 | 0.0112 | 0.0212 | 0.0203 | 0.0180 | 0.1420 | 0.2065 | 0.2043 | 0.0155 | 0.0337 | 0.0480 | 0.0116 | 0.0163 | 0.0434 | 0.0158 |

|              |        |        |        |        |        |        |        |        |        |        |        |        |        |        |        |
|--------------|--------|--------|--------|--------|--------|--------|--------|--------|--------|--------|--------|--------|--------|--------|--------|
| CAV2_E33_R   | 0.0095 | 0.0000 | 0.3806 | 0.0134 | 0.0261 | 0.9850 | 0.1432 | 0.0071 | 0.2666 | 0.4760 | 0.0171 | 0.1308 | 0.3044 | 0.0416 | 0.0106 |
| CCKBR_P361_R | 0.0133 | 0.1601 | 0.0098 | 0.0215 | 0.3046 | 0.0104 | 0.0184 | 0.0827 | 0.0000 | 0.0000 | 0.0164 | 0.0157 | 0.0070 | 0.0196 | 0.0089 |
| CCKBR_P480_F | 0.0000 | 0.0000 | 0.0000 | 0.0000 | 0.0035 | 0.0028 | 0.0145 | 0.0000 | 0.0000 | 0.0000 | 0.0029 | 0.0026 | 0.0000 | 0.1163 | 0.0033 |
| CCNA1_E7_F   | 0.4141 | 0.0000 | 0.9739 | 0.9949 | 0.9950 | 0.9816 | 0.0000 | 0.0291 | 0.9861 | 0.9897 | 0.7807 | 0.0000 | 0.9753 | 0.9943 | 0.0000 |
| CCNA1_P216_F | 0.0000 | 0.0000 | 0.0000 | 0.0106 | 0.0000 | 0.0000 | 0.0017 | 0.0000 | 0.0000 | 0.0000 | 0.0000 | 0.0000 | 0.0000 | 0.0000 | 0.0000 |
| CCNC_P132_R  | 0.0102 | 0.0000 | 0.3146 | 0.0229 | 0.0066 | 0.0000 | 0.0000 | 0.0000 | 0.0000 | 0.0000 | 0.6926 | 0.0031 | 0.1462 | 0.5049 | 0.9892 |
| CCND1_E280_R | 0.1536 | 0.0000 | 0.5821 | 0.0133 | 0.0000 | 0.0000 | 0.0000 | 0.0025 | 0.0000 | 0.0000 | 0.1967 | 0.0055 | 0.5463 | 0.0000 | 0.0013 |
| CCND1_P343_R | 0.0000 | 0.0000 | 0.0000 | 0.0000 | 0.0000 | 0.0000 | 0.0000 | 0.0002 | 0.0000 | 0.0000 | 0.0000 | 0.0000 | 0.0000 | 0.0000 | 0.0000 |
| CCND2_P887_F | 0.0000 | 0.0000 | 0.0000 | 0.0000 | 0.0000 | 0.0000 | 0.0000 | 0.0000 | 0.0000 | 0.0000 | 0.0000 | 0.0023 | 0.0000 | 0.0067 | 0.0001 |
| CCND2_P898_R | 0.4393 | 0.6111 | 0.8362 | 0.0512 | 0.5425 | 0.0473 | 0.4683 | 0.5058 | 0.9027 | 0.7979 | 0.9209 | 0.4461 | 0.9292 | 0.7674 | 0.0726 |
| CCNE1_P683_F | 0.0000 | 0.0000 | 0.0883 | 0.0062 | 0.0000 | 0.0000 | 0.0000 | 0.0000 | 0.0000 | 0.0000 | 0.0000 | 0.0000 | 0.0000 | 0.0000 | 0.0000 |
| CD1A_P414_R  | 0.0668 | 0.0000 | 0.0082 | 0.0000 | 0.1599 | 0.0137 | 0.0000 | 0.0000 | 0.0000 | 0.0000 | 0.0120 | 0.0077 | 0.0037 | 0.0000 | 0.2538 |
| CD2_P68_F    | 0.5067 | 0.4693 | 0.6228 | 0.9945 | 0.8047 | 0.9940 | 0.0157 | 0.0000 | 0.2404 | 0.7038 | 0.4958 | 0.2919 | 0.6376 | 0.0167 | 0.0049 |
| CD34_P339_R  | 0.2042 | 0.0000 | 0.0226 | 0.1918 | 0.1705 | 0.2244 | 0.1997 | 0.0146 | 0.0000 | 0.0000 | 0.0194 | 0.0459 | 0.0115 | 0.3482 | 0.0175 |
| CD34_P780_R  | 0.9937 | 0.3103 | 0.9012 | 0.9826 | 0.9523 | 0.0497 | 0.0219 | 0.0133 | 0.9025 | 0.7514 | 0.6823 | 0.4531 | 0.8770 | 0.9946 | 0.8070 |
| CD40_E58_R   | 0.0000 | 0.0000 | 0.0013 | 0.0000 | 0.0000 | 0.0353 | 0.0000 | 0.0499 | 0.0000 | 0.0000 | 0.0098 | 0.0000 | 0.0000 | 0.0000 | 0.0036 |
| CD40_P372_R  | 0.0182 | 0.0000 | 0.1337 | 0.0164 | 0.1728 | 0.0344 | 0.0116 | 0.2416 | 0.0168 | 0.0138 | 0.0247 | 0.0313 | 0.0155 | 0.1794 | 0.0184 |
| CD44_E26_F   | 0.0000 | 0.0000 | 0.0675 | 0.0000 | 0.0000 | 0.0065 | 0.0000 | 0.0020 | 0.0000 | 0.0000 | 0.0000 | 0.0058 | 0.0000 | 0.0000 | 0.0000 |
| CD44_P87_F   | 0.0172 | 0.0000 | 0.8771 | 0.9963 | 0.0000 | 0.0000 | 0.0000 | 0.0000 | 0.9718 | 0.0000 | 0.0013 | 0.0000 | 0.5597 | 0.0052 | 0.0000 |
| CD86_P3_F    | 0.0000 | 0.0000 | 0.0000 | 0.0000 | 0.0000 | 0.0000 | 0.0000 | 0.0000 | 0.0000 | 0.0000 | 0.0000 | 0.0099 | 0.0000 | 0.0000 | 0.0000 |
| CDC25B_E83_F | 0.0000 | 0.0000 | 0.0000 | 0.0080 | 0.0000 | 0.0000 | 0.0000 | 0.0000 | 0.0000 | 0.0000 | 0.0016 | 0.0000 | 0.0000 | 0.0000 | 0.0000 |
| CDC25B_P11_R | 0.0000 | 0.0000 | 0.0115 | 0.0000 | 0.0000 | 0.0020 | 0.1433 | 0.1819 | 0.0000 | 0.0000 | 0.0106 | 0.0136 | 0.0029 | 0.0072 | 0.0675 |
| CDH1_P52_R   | 0.0000 | 0.0000 | 0.0000 | 0.0065 | 0.0000 | 0.0000 | 0.0033 | 0.0000 | 0.0000 | 0.0000 | 0.0020 | 0.0001 | 0.0000 | 0.0045 | 0.0001 |
| CDH11_E102_R | 0.1413 | 0.0000 | 0.0023 | 0.0000 | 0.0051 | 0.0000 | 0.0000 | 0.0000 | 0.0000 | 0.0000 | 0.0081 | 0.0026 | 0.1588 | 0.0064 | 0.0000 |
| CDH11_P203_R | 0.3303 | 0.3873 | 0.0159 | 0.0184 | 0.0137 | 0.0906 | 0.5288 | 0.3957 | 0.0000 | 0.0000 | 0.2028 | 0.0162 | 0.0072 | 0.7984 | 0.5562 |
| CDH11_P354_R | 0.0106 | 0.0000 | 0.0045 | 0.0062 | 0.0000 | 0.0036 | 0.0052 | 0.0000 | 0.0000 | 0.0000 | 0.4400 | 0.0029 | 0.0000 | 0.0000 | 0.0000 |
| CDH13_E102_F | 0.3145 | 0.8356 | 0.9859 | 0.0000 | 0.0121 | 0.9938 | 0.1856 | 0.9925 | 0.9875 | 0.9853 | 0.9902 | 0.9878 | 0.9864 | 0.9929 | 0.9919 |
| CDH17_E31_F  | 0.4089 | 0.0000 | 0.5029 | 0.2589 | 0.0061 | 0.0099 | 0.4980 | 0.0000 | 0.9798 | 0.2830 | 0.0176 | 0.0149 | 0.0905 | 0.0000 | 0.2446 |
| CDH17_P532_F | 0.9927 | 0.2994 | 0.9792 | 0.7485 | 0.6302 | 0.9939 | 0.6103 | 0.9873 | 0.9835 | 0.9884 | 0.9803 | 0.9084 | 0.9768 | 0.9918 | 0.5387 |
| CDH3_E100_R  | 0.2051 | 0.0000 | 0.0327 | 0.0183 | 0.1473 | 0.0182 | 0.0168 | 0.2020 | 0.0175 | 0.0200 | 0.0303 | 0.1683 | 0.0217 | 0.1286 | 0.0215 |
| CDH3_P87_R   | 0.0000 | 0.0000 | 0.0012 | 0.0085 | 0.0000 | 0.0000 | 0.0039 | 0.0000 | 0.0000 | 0.0000 | 0.0042 | 0.0003 | 0.0000 | 0.0117 | 0.0047 |
| CDK10_E74_F  | 0.5346 | 0.1532 | 0.6455 | 0.5720 | 0.0222 | 0.4692 | 0.5221 | 0.4123 | 0.9405 | 0.9849 | 0.4814 | 0.5217 | 0.9430 | 0.0701 | 0.0303 |
| CDK2_P330_R  | 0.0000 | 0.0000 | 0.6122 | 0.0000 | 0.0000 | 0.0000 | 0.0000 | 0.9926 | 0.9851 | 0.9213 | 0.0105 | 0.9858 | 0.8971 | 0.0000 | 0.0034 |



|                   |        |        |        |        |        |        |        |        |        |        |        |        |        |        |        |
|-------------------|--------|--------|--------|--------|--------|--------|--------|--------|--------|--------|--------|--------|--------|--------|--------|
| CDK6_E256_F       | 0.0089 | 0.0000 | 0.1190 | 0.0000 | 0.0071 | 0.0000 | 0.0100 | 0.0000 | 0.0000 | 0.2747 | 0.0094 | 0.0000 | 0.3720 | 0.0000 | 0.0041 |
| CDK6_P291_R       | 0.0101 | 0.0000 | 0.0172 | 0.2251 | 0.2620 | 0.0131 | 0.2332 | 0.3122 | 0.0003 | 0.2189 | 0.0478 | 0.0372 | 0.0142 | 0.1009 | 0.0148 |
| CDKN1A_E101_F     | 0.0070 | 0.0000 | 0.1057 | 0.0000 | 0.0000 | 0.0000 | 0.0000 | 0.0955 | 0.8144 | 0.0000 | 0.0123 | 0.9760 | 0.1563 | 0.0102 | 0.0901 |
| CDKN1A_P242_F     | 0.0000 | 0.0000 | 0.0040 | 0.0000 | 0.0070 | 0.0036 | 0.0000 | 0.0919 | 0.0000 | 0.0000 | 0.0068 | 0.0061 | 0.0633 | 0.9606 | 0.0000 |
| CDKN1B_P1161_F    | 0.1047 | 0.2337 | 0.0000 | 0.0616 | 0.0000 | 0.0000 | 0.0044 | 0.0014 | 0.4799 | 0.0000 | 0.0000 | 0.0000 | 0.1450 | 0.0000 | 0.0000 |
| CDKN2A_E121_R     | 0.0000 | 0.0000 | 0.0982 | 0.0096 | 0.0095 | 0.0043 | 0.0046 | 0.0033 | 0.0000 | 0.0000 | 0.0105 | 0.0064 | 0.0549 | 0.0000 | 0.0063 |
| CDKN2B_E220_F     | 0.0000 | 0.4379 | 0.5241 | 0.0000 | 0.0000 | 0.0000 | 0.0054 | 0.0000 | 0.0000 | 0.0000 | 0.0000 | 0.0031 | 0.1317 | 0.0092 | 0.0000 |
| CDM_seq_21_S260_R | 0.0000 | 0.0000 | 0.1345 | 0.0000 | 0.0000 | 0.0000 | 0.0095 | 0.0000 | 0.0000 | 0.0000 | 0.0851 | 0.0000 | 0.0000 | 0.0170 | 0.0050 |
| CEACAM1_E57_R     | 0.0105 | 0.0000 | 0.0065 | 0.0000 | 0.0068 | 0.0032 | 0.0000 | 0.0028 | 0.0000 | 0.0000 | 0.0079 | 0.0000 | 0.0000 | 0.0000 | 0.0030 |
| CEACAM1_P44_R     | 0.0090 | 0.0000 | 0.0732 | 0.0000 | 0.0000 | 0.0148 | 0.2851 | 0.1521 | 0.0000 | 0.0000 | 0.0109 | 0.2050 | 0.0856 | 0.0079 | 0.9918 |
| CEBPA_P1163_R     | 0.0104 | 0.1857 | 0.0198 | 0.0804 | 0.1700 | 0.0140 | 0.0091 | 0.1311 | 0.0000 | 0.0000 | 0.0155 | 0.0142 | 0.0083 | 0.0116 | 0.0136 |
| CEBPA_P706_F      | 0.0090 | 0.0000 | 0.0148 | 0.0099 | 0.0080 | 0.0000 | 0.1396 | 0.0942 | 0.2060 | 0.0000 | 0.0101 | 0.0064 | 0.2958 | 0.0000 | 0.7765 |
| CFTR_P115_F       | 0.0000 | 0.0000 | 0.0058 | 0.1031 | 0.0037 | 0.0030 | 0.0000 | 0.0000 | 0.0000 | 0.0000 | 0.0076 | 0.0057 | 0.0000 | 0.0000 | 0.0000 |
| CHD2_P451_F       | 0.0000 | 0.0000 | 0.5727 | 0.0100 | 0.0054 | 0.0000 | 0.0041 | 0.0000 | 0.0000 | 0.0000 | 0.0047 | 0.0000 | 0.6895 | 0.0037 | 0.0000 |
| CHFR_P501_F       | 0.0000 | 0.0000 | 0.0031 | 0.0063 | 0.0050 | 0.0000 | 0.0087 | 0.0010 | 0.0000 | 0.0000 | 0.0056 | 0.0051 | 0.0000 | 0.0072 | 0.0000 |
| CHFR_P635_R       | 0.0990 | 0.2466 | 0.9839 | 0.9847 | 0.0000 | 0.9108 | 0.0638 | 0.7563 | 0.9900 | 0.9344 | 0.9785 | 0.3623 | 0.9820 | 0.0018 | 0.2392 |
| CHGA_E52_F        | 0.0000 | 0.0000 | 0.0017 | 0.0092 | 0.0000 | 0.0014 | 0.0066 | 0.0000 | 0.0000 | 0.0000 | 0.0051 | 0.0000 | 0.0000 | 0.0067 | 0.0000 |
| CHI3L2_E10_F      | 0.0148 | 0.2373 | 0.6301 | 0.0000 | 0.0126 | 0.0004 | 0.0000 | 0.0000 | 0.2531 | 0.4122 | 0.1514 | 0.0060 | 0.6929 | 0.0128 | 0.0066 |
| CLK1_P538_F       | 0.0000 | 0.0000 | 0.0008 | 0.0000 | 0.0019 | 0.0000 | 0.0000 | 0.0000 | 0.0000 | 0.0000 | 0.0032 | 0.0011 | 0.0000 | 0.0000 | 0.0000 |
| COL18A1_P365_R    | 0.0198 | 0.7978 | 0.0102 | 0.0000 | 0.2237 | 0.0225 | 0.0116 | 0.2287 | 0.0000 | 0.0000 | 0.0197 | 0.0138 | 0.0488 | 0.0000 | 0.0112 |
| COL1A1_P5_F       | 0.0000 | 0.0000 | 0.0000 | 0.0000 | 0.0000 | 0.0000 | 0.0080 | 0.0000 | 0.0000 | 0.0000 | 0.0042 | 0.0002 | 0.0000 | 0.0000 | 0.0000 |
| COL1A2_E299_F     | 0.0186 | 0.0000 | 0.4090 | 0.0129 | 0.0054 | 0.0070 | 0.0000 | 0.7496 | 0.2314 | 0.5438 | 0.4249 | 0.0065 | 0.4443 | 0.0000 | 0.0000 |
| COL1A2_P407_R     | 0.0134 | 0.0000 | 0.0000 | 0.0000 | 0.0044 | 0.0000 | 0.0038 | 0.0017 | 0.5875 | 0.0000 | 0.0000 | 0.0000 | 0.0000 | 0.0000 | 0.0000 |
| COL1A2_P48_R      | 0.1108 | 0.0000 | 0.0336 | 0.0756 | 0.1386 | 0.1611 | 0.1418 | 0.0729 | 0.0000 | 0.0019 | 0.0293 | 0.0458 | 0.0244 | 0.0296 | 0.1590 |
| COL4A3_E205_R     | 0.0000 | 0.4457 | 0.1546 | 0.0000 | 0.0000 | 0.0000 | 0.0053 | 0.0025 | 0.0000 | 0.0000 | 0.0033 | 0.0043 | 0.0994 | 0.0000 | 0.1386 |
| COL4A3_P545_F     | 0.7080 | 0.4330 | 0.0177 | 0.0651 | 0.0573 | 0.7948 | 0.7762 | 0.0379 | 0.0074 | 0.8140 | 0.0329 | 0.0360 | 0.0211 | 0.4633 | 0.0633 |
| COL6A1_P283_F     | 0.0281 | 0.0000 | 0.3487 | 0.0000 | 0.0596 | 0.8802 | 0.9513 | 0.0447 | 0.4609 | 0.0000 | 0.0242 | 0.0427 | 0.2603 | 0.0018 | 0.0021 |
| COL6A1_P425_F     | 0.4578 | 0.0000 | 0.0092 | 0.0000 | 0.0000 | 0.0260 | 0.0000 | 0.0053 | 0.0000 | 0.0000 | 0.0202 | 0.1151 | 0.2771 | 0.1812 | 0.0430 |
| COPG2_P298_F      | 0.1548 | 0.2834 | 0.0360 | 0.1518 | 0.6359 | 0.1065 | 0.1090 | 0.5577 | 0.0535 | 0.0773 | 0.0637 | 0.5156 | 0.0546 | 0.7905 | 0.1120 |
| CPA4_P1265_R      | 0.6992 | 0.9098 | 0.0367 | 0.9919 | 0.7797 | 0.0302 | 0.6669 | 0.6668 | 0.0486 | 0.0022 | 0.0510 | 0.0580 | 0.0300 | 0.1002 | 0.0197 |
| CREB1_P819_F      | 0.0000 | 0.2804 | 0.1504 | 0.0121 | 0.0097 | 0.0000 | 0.0115 | 0.0000 | 0.0000 | 0.0000 | 0.0118 | 0.0042 | 0.1193 | 0.0157 | 0.0000 |
| CRIP1_P874_R      | 0.2212 | 0.7759 | 0.1217 | 0.9909 | 0.0106 | 0.0100 | 0.0143 | 0.0049 | 0.0000 | 0.0000 | 0.0125 | 0.3751 | 0.1344 | 0.4529 | 0.0129 |
| CRK_P721_F        | 0.0078 | 0.0000 | 0.0265 | 0.0106 | 0.0060 | 0.0050 | 0.0052 | 0.0040 | 0.0000 | 0.0000 | 0.0053 | 0.0044 | 0.0214 | 0.0110 | 0.0035 |

|               |        |        |        |        |        |        |        |        |        |        |        |        |        |        |        |
|---------------|--------|--------|--------|--------|--------|--------|--------|--------|--------|--------|--------|--------|--------|--------|--------|
| CSF1_P217_F   | 0.1878 | 0.0000 | 0.5614 | 0.0378 | 0.1379 | 0.9934 | 0.9921 | 0.1093 | 0.0000 | 0.0000 | 0.0208 | 0.0178 | 0.7533 | 0.0550 | 0.1437 |
| CSF1_P339_F   | 0.0000 | 0.0000 | 0.0000 | 0.0000 | 0.0000 | 0.0000 | 0.0000 | 0.0000 | 0.0000 | 0.0000 | 0.0031 | 0.0000 | 0.0000 | 0.0000 | 0.0000 |
| CSF1R_E26_F   | 0.1208 | 0.5216 | 0.0006 | 0.0103 | 0.0068 | 0.0000 | 0.0074 | 0.0000 | 0.0000 | 0.0000 | 0.0079 | 0.0052 | 0.0000 | 0.0071 | 0.0000 |
| CSF3R_P472_F  | 0.0267 | 0.0192 | 0.1148 | 0.1662 | 0.1745 | 0.1862 | 0.0301 | 0.1626 | 0.0126 | 0.0438 | 0.0266 | 0.0231 | 0.0243 | 0.0279 | 0.0338 |
| CSPG2_E38_F   | 0.0250 | 0.0000 | 0.0035 | 0.0000 | 0.0000 | 0.0087 | 0.0000 | 0.0000 | 0.0000 | 0.0000 | 0.0077 | 0.0178 | 0.0000 | 0.0127 | 0.0047 |
| CSPG2_P82_R   | 0.0000 | 0.0000 | 0.0999 | 0.0000 | 0.0000 | 0.0000 | 0.5090 | 0.1174 | 0.0000 | 0.0000 | 0.4646 | 0.2466 | 0.0000 | 0.0098 | 0.0038 |
| CSTB_E410_F   | 0.0080 | 0.5755 | 0.7835 | 0.0000 | 0.9940 | 0.0062 | 0.0040 | 0.0000 | 0.9835 | 0.6139 | 0.8089 | 0.9176 | 0.7654 | 0.0000 | 0.0000 |
| CTAG1B_P4_R   | 0.0000 | 0.0000 | 0.2422 | 0.0075 | 0.0000 | 0.0000 | 0.0000 | 0.0000 | 0.0000 | 0.4570 | 0.0003 | 0.0000 | 0.0558 | 0.0047 | 0.0000 |
| CTAG1B_P77_F  | 0.4090 | 0.7890 | 0.4731 | 0.2213 | 0.3770 | 0.2795 | 0.0160 | 0.7827 | 0.0690 | 0.1766 | 0.8024 | 0.8255 | 0.2877 | 0.0926 | 0.0447 |
| CTAG2_P1426_F | 0.4953 | 0.4734 | 0.0144 | 0.7272 | 0.0251 | 0.0305 | 0.0247 | 0.6826 | 0.0000 | 0.0000 | 0.0094 | 0.0168 | 0.0059 | 0.8521 | 0.0138 |
| CTGF_E156_F   | 0.0089 | 0.0652 | 0.0005 | 0.1432 | 0.0000 | 0.0000 | 0.0079 | 0.0000 | 0.0000 | 0.0000 | 0.0028 | 0.0032 | 0.1032 | 0.0138 | 0.0012 |
| CTLA4_P1128_F | 0.0316 | 0.9878 | 0.3771 | 0.9958 | 0.9316 | 0.4255 | 0.2379 | 0.2891 | 0.7289 | 0.7186 | 0.2441 | 0.9920 | 0.6709 | 0.9960 | 0.9777 |
| CTNNA1_P185_R | 0.0000 | 0.0000 | 0.0015 | 0.0000 | 0.0000 | 0.0036 | 0.0078 | 0.0000 | 0.0000 | 0.0000 | 0.0052 | 0.0014 | 0.0000 | 0.0000 | 0.0032 |
| CTNNA1_P382_R | 0.0069 | 0.0000 | 0.0033 | 0.1315 | 0.3285 | 0.0847 | 0.9931 | 0.0054 | 0.0000 | 0.0000 | 0.0086 | 0.0052 | 0.0000 | 0.0111 | 0.0025 |
| CTNNB1_P757_F | 0.0723 | 0.0300 | 0.0735 | 0.0324 | 0.0985 | 0.0054 | 0.0614 | 0.1029 | 0.0000 | 0.0000 | 0.0087 | 0.0071 | 0.0032 | 0.0395 | 0.0082 |
| CTSD_P726_F   | 0.0000 | 0.0000 | 0.0000 | 0.0000 | 0.0000 | 0.0000 | 0.0288 | 0.0000 | 0.0000 | 0.0000 | 0.0000 | 0.0000 | 0.0000 | 0.8212 | 0.0000 |
| CTSH_P238_F   | 0.0397 | 0.0000 | 0.0000 | 0.0000 | 0.1163 | 0.0000 | 0.0000 | 0.0000 | 0.0000 | 0.0000 | 0.0000 | 0.0000 | 0.0000 | 0.0000 | 0.0000 |
| CTSL_P264_R   | 0.0013 | 0.0000 | 0.0054 | 0.0000 | 0.0096 | 0.0192 | 0.0000 | 0.0016 | 0.0000 | 0.0000 | 0.0088 | 0.0103 | 0.2097 | 0.0000 | 0.0028 |
| CTSL_P81_F    | 0.0000 | 0.0000 | 0.0019 | 0.0114 | 0.0000 | 0.0000 | 0.0051 | 0.0051 | 0.0000 | 0.0000 | 0.0078 | 0.0072 | 0.0000 | 0.0000 | 0.0083 |
| CTTN_E29_R    | 0.0121 | 0.0000 | 0.0034 | 0.0108 | 0.0078 | 0.0082 | 0.0000 | 0.0000 | 0.0000 | 0.0000 | 0.0102 | 0.0154 | 0.0000 | 0.0096 | 0.0000 |
| CYP1A1_P382_F | 0.0742 | 0.0000 | 0.0350 | 0.0258 | 0.5925 | 0.3221 | 0.2567 | 0.5204 | 0.0000 | 0.0000 | 0.0298 | 0.0798 | 0.0463 | 0.0318 | 0.4801 |
| CYP2E1_P416_F | 0.2617 | 0.0000 | 0.2850 | 0.1415 | 0.0000 | 0.0013 | 0.0065 | 0.1722 | 0.0000 | 0.0000 | 0.0116 | 0.0000 | 0.0000 | 0.0000 | 0.0054 |
| DAB2_P35_F    | 0.0203 | 0.0000 | 0.2536 | 0.0163 | 0.0000 | 0.0000 | 0.0134 | 0.0000 | 0.0000 | 0.0000 | 0.0000 | 0.0000 | 0.3438 | 0.0080 | 0.0000 |
| DAB2_P468_F   | 0.9836 | 0.0084 | 0.0349 | 0.2122 | 0.1534 | 0.0397 | 0.1045 | 0.0392 | 0.0035 | 0.0361 | 0.0211 | 0.1566 | 0.2033 | 0.3110 | 0.0198 |
| DAB2IP_P9_F   | 0.0000 | 0.0000 | 0.0000 | 0.0029 | 0.0000 | 0.0000 | 0.0000 | 0.0000 | 0.0000 | 0.0000 | 0.0000 | 0.0000 | 0.3684 | 0.0000 | 0.0000 |
| DAPK1_P10_F   | 0.0089 | 0.0000 | 0.2724 | 0.0067 | 0.0000 | 0.0000 | 0.0000 | 0.0053 | 0.0000 | 0.0000 | 0.3852 | 0.0024 | 0.0000 | 0.7061 | 0.1412 |
| DAPK1_P345_R  | 0.0000 | 0.0000 | 0.0000 | 0.0000 | 0.0000 | 0.0000 | 0.0000 | 0.0000 | 0.0000 | 0.0000 | 0.0063 | 0.0009 | 0.0996 | 0.0062 | 0.0020 |
| DBC1_P351_R   | 0.0000 | 0.0000 | 0.0037 | 0.0000 | 0.0000 | 0.0030 | 0.0000 | 0.0000 | 0.0000 | 0.0000 | 0.0043 | 0.0000 | 0.0675 | 0.0000 | 0.0000 |
| DCC_P177_F    | 0.3130 | 0.5924 | 0.0109 | 0.0106 | 0.0127 | 0.0000 | 0.0054 | 0.4402 | 0.0000 | 0.0000 | 0.0192 | 0.3702 | 0.1214 | 0.4609 | 0.0348 |
| DCC_P471_R    | 0.0068 | 0.0000 | 0.0188 | 0.3556 | 0.0291 | 0.0390 | 0.2375 | 0.0083 | 0.0000 | 0.0000 | 0.0177 | 0.0084 | 0.1038 | 0.0150 | 0.2566 |
| DCN_P1320_R   | 0.0000 | 0.0000 | 0.0000 | 0.0000 | 0.0000 | 0.0216 | 0.0000 | 0.0000 | 0.0000 | 0.0000 | 0.0000 | 0.0000 | 0.0000 | 0.0000 | 0.0000 |
| DDB2_P407_F   | 0.0000 | 0.0000 | 0.0000 | 0.0143 | 0.0055 | 0.0018 | 0.0056 | 0.0000 | 0.0000 | 0.0000 | 0.0000 | 0.9810 | 0.3063 | 0.0000 | 0.0000 |
| DDB2_P613_R   | 0.0140 | 0.0000 | 0.0041 | 0.0610 | 0.0094 | 0.4660 | 0.0000 | 0.1945 | 0.0000 | 0.0000 | 0.0080 | 0.0054 | 0.0000 | 0.0000 | 0.0048 |

|                     |        |        |        |        |        |        |        |        |        |        |        |        |        |        |        |
|---------------------|--------|--------|--------|--------|--------|--------|--------|--------|--------|--------|--------|--------|--------|--------|--------|
| DDR1_E23_R          | 0.0092 | 0.0000 | 0.0461 | 0.0000 | 0.0000 | 0.0021 | 0.0000 | 0.0000 | 0.0000 | 0.0000 | 0.0073 | 0.0063 | 0.0000 | 0.0000 | 0.0000 |
| DDR2_E331_F         | 0.9940 | 0.0000 | 0.9744 | 0.0000 | 0.1911 | 0.9932 | 0.0000 | 0.9923 | 0.9640 | 0.0000 | 0.9783 | 0.9860 | 0.9728 | 0.0000 | 0.9936 |
| DES_E228_R          | 0.0000 | 0.0000 | 0.0818 | 0.0000 | 0.0000 | 0.0000 | 0.0000 | 0.0054 | 0.0000 | 0.0000 | 0.0087 | 0.0000 | 0.0000 | 0.0000 | 0.0000 |
| DHCR24_P406_R       | 0.1237 | 0.3831 | 0.3595 | 0.0134 | 0.0161 | 0.0170 | 0.0298 | 0.0763 | 0.0295 | 0.7304 | 0.0144 | 0.0117 | 0.1120 | 0.0087 | 0.1182 |
| DIO3_E230_R         | 0.0112 | 0.0000 | 0.0820 | 0.0000 | 0.0087 | 0.0104 | 0.0101 | 0.0000 | 0.0000 | 0.0000 | 0.0098 | 0.0053 | 0.0000 | 0.0069 | 0.0042 |
| DIO3_P674_F         | 0.0122 | 0.6507 | 0.1346 | 0.3160 | 0.0112 | 0.9863 | 0.2545 | 0.1789 | 0.0000 | 0.0000 | 0.5529 | 0.0127 | 0.7012 | 0.9711 | 0.0063 |
| DIRAS3_E55_R        | 0.0000 | 0.0000 | 0.0270 | 0.0264 | 0.0000 | 0.0056 | 0.0000 | 0.0099 | 0.0000 | 0.0000 | 0.0244 | 0.0160 | 0.0313 | 0.0000 | 0.0183 |
| DKC1_E101_F         | 0.0000 | 0.0000 | 0.2374 | 0.0000 | 0.0000 | 0.0000 | 0.0000 | 0.0000 | 0.0000 | 0.0000 | 0.0000 | 0.0000 | 0.0000 | 0.0000 | 0.0000 |
| DKFZP564O0823_E45_F | 0.0000 | 0.0000 | 0.2027 | 0.0115 | 0.0000 | 0.0000 | 0.0000 | 0.0260 | 0.3661 | 0.0000 | 0.2524 | 0.0000 | 0.0000 | 0.0000 | 0.0000 |
| DLC1_P88_R          | 0.0060 | 0.0000 | 0.6676 | 0.0000 | 0.0000 | 0.0000 | 0.0032 | 0.0012 | 0.0000 | 0.6930 | 0.0029 | 0.0000 | 0.5975 | 0.0008 | 0.0000 |
| DLK1_E227_R         | 0.9979 | 0.9341 | 0.9916 | 0.9975 | 0.9971 | 0.9972 | 0.9958 | 0.9969 | 0.9950 | 0.9954 | 0.9807 | 0.9414 | 0.9938 | 0.8879 | 0.9966 |
| DLL1_P386_F         | 0.0000 | 0.0000 | 0.9716 | 0.0000 | 0.0077 | 0.0000 | 0.0000 | 0.0000 | 0.9786 | 0.9481 | 0.0000 | 0.0000 | 0.9137 | 0.0000 | 0.8553 |
| DLL1_P832_F         | 0.0000 | 0.0000 | 0.1821 | 0.0000 | 0.0000 | 0.0000 | 0.0879 | 0.2936 | 0.0000 | 0.0000 | 0.5235 | 0.9901 | 0.2538 | 0.0051 | 0.0000 |
| DMP1_P134_F         | 0.1592 | 0.2560 | 0.1162 | 0.0337 | 0.0143 | 0.0120 | 0.0095 | 0.2183 | 0.3398 | 0.0000 | 0.0106 | 0.0097 | 0.0120 | 0.1700 | 0.0166 |
| DNAJC15_E26_R       | 0.0065 | 0.0000 | 0.0675 | 0.0076 | 0.0074 | 0.0049 | 0.0475 | 0.0000 | 0.0000 | 0.0000 | 0.0132 | 0.0066 | 0.0018 | 0.0084 | 0.0044 |
| DNASE1L1_P108_F     | 0.2849 | 0.4950 | 0.9007 | 0.7708 | 0.5517 | 0.0325 | 0.6562 | 0.9904 | 0.9895 | 0.5808 | 0.5139 | 0.0204 | 0.9245 | 0.5685 | 0.5133 |
| DNMT1_P100_R        | 0.2816 | 0.0000 | 0.9852 | 0.1119 | 0.9941 | 0.9952 | 0.0616 | 0.4291 | 0.9896 | 0.9433 | 0.9239 | 0.9843 | 0.9817 | 0.0175 | 0.9901 |
| DSC2_E90_F          | 0.0000 | 0.0000 | 0.9559 | 0.0000 | 0.0000 | 0.9856 | 0.0000 | 0.0000 | 0.9085 | 0.8946 | 0.0000 | 0.0000 | 0.9536 | 0.0000 | 0.0000 |
| DSP_P440_R          | 0.3213 | 0.3080 | 0.9813 | 0.9949 | 0.0223 | 0.3454 | 0.9912 | 0.3781 | 0.9855 | 0.7141 | 0.7078 | 0.9869 | 0.9359 | 0.7751 | 0.9919 |
| DST_E31_F           | 0.0473 | 0.7397 | 0.7755 | 0.0000 | 0.9946 | 0.8282 | 0.0106 | 0.9939 | 0.5249 | 0.9884 | 0.9791 | 0.0214 | 0.4372 | 0.0099 | 0.2824 |
| DST_P262_R          | 0.5653 | 0.9293 | 0.0572 | 0.0256 | 0.9130 | 0.1901 | 0.6072 | 0.5654 | 0.0481 | 0.0998 | 0.0814 | 0.0575 | 0.0584 | 0.0594 | 0.0399 |
| DUSP4_E61_F         | 0.0000 | 0.0000 | 0.0046 | 0.0000 | 0.0101 | 0.0018 | 0.0000 | 0.0000 | 0.0000 | 0.0000 | 0.0087 | 0.0056 | 0.0000 | 0.0119 | 0.0000 |
| DUSP4_P925_R        | 0.0190 | 0.2085 | 0.0250 | 0.0148 | 0.0208 | 0.6869 | 0.5369 | 0.4226 | 0.0039 | 0.0000 | 0.4952 | 0.5178 | 0.2000 | 0.0456 | 0.3992 |
| E2F3_P840_R         | 0.0100 | 0.0000 | 0.7956 | 0.0000 | 0.0039 | 0.0000 | 0.0049 | 0.0027 | 0.0000 | 0.0000 | 0.0244 | 0.7476 | 0.4589 | 0.0000 | 0.6376 |
| E2F5_P516_R         | 0.9862 | 0.8705 | 0.9487 | 0.1382 | 0.9860 | 0.0122 | 0.0000 | 0.0000 | 0.9633 | 0.9526 | 0.9150 | 0.9787 | 0.9470 | 0.9799 | 0.9741 |
| EDN1_E50_R          | 0.4196 | 0.2555 | 0.2720 | 0.9943 | 0.9709 | 0.3439 | 0.5943 | 0.9486 | 0.5341 | 0.4425 | 0.4952 | 0.2122 | 0.4013 | 0.8221 | 0.9669 |
| EDN1_P39_R          | 0.5194 | 0.9913 | 0.0173 | 0.9307 | 0.1824 | 0.0043 | 0.9012 | 0.7074 | 0.0000 | 0.0514 | 0.0350 | 0.9714 | 0.1857 | 0.9933 | 0.4862 |
| EDNRB_P148_R        | 0.1773 | 0.0000 | 0.9776 | 0.0000 | 0.0000 | 0.0000 | 0.0000 | 0.0000 | 0.6996 | 0.0000 | 0.6946 | 0.0000 | 0.9729 | 0.0000 | 0.0000 |
| EFNA1_P591_R        | 0.3813 | 0.8059 | 0.2360 | 0.3897 | 0.0094 | 0.1609 | 0.2997 | 0.0578 | 0.0000 | 0.0000 | 0.0041 | 0.0069 | 0.1698 | 0.0000 | 0.0189 |
| EFNA1_P7_F          | 0.0000 | 0.0000 | 0.7155 | 0.0060 | 0.0000 | 0.0000 | 0.0061 | 0.0000 | 0.0000 | 0.3794 | 0.4837 | 0.0043 | 0.9740 | 0.0000 | 0.0002 |
| EFNB1_E69_F         | 0.4618 | 0.0000 | 0.1489 | 0.4402 | 0.1221 | 0.2950 | 0.2288 | 0.2846 | 0.0000 | 0.0000 | 0.0107 | 0.9877 | 0.2644 | 0.0000 | 0.0076 |
| EFNB3_P442_R        | 0.5819 | 0.0000 | 0.0018 | 0.0085 | 0.0001 | 0.0065 | 0.0000 | 0.0007 | 0.0000 | 0.0000 | 0.0078 | 0.0028 | 0.0000 | 0.0107 | 0.0000 |
| EGF_E339_F          | 0.9863 | 0.0000 | 0.1583 | 0.0000 | 0.0000 | 0.0000 | 0.0029 | 0.0000 | 0.0000 | 0.0000 | 0.1789 | 0.0021 | 0.5453 | 0.0000 | 0.0007 |

|                |        |        |        |        |        |        |        |        |        |        |        |        |        |        |        |
|----------------|--------|--------|--------|--------|--------|--------|--------|--------|--------|--------|--------|--------|--------|--------|--------|
| EGFR_E295_R    | 0.2025 | 0.0595 | 0.0032 | 0.1918 | 0.0214 | 0.1214 | 0.0051 | 0.0028 | 0.0000 | 0.0000 | 0.0046 | 0.0050 | 0.1616 | 0.0143 | 0.0039 |
| EGFR_P260_R    | 0.0000 | 0.0000 | 0.5169 | 0.0000 | 0.0000 | 0.0000 | 0.0000 | 0.0032 | 0.9864 | 0.0000 | 0.0017 | 0.0000 | 0.0000 | 0.9915 | 0.0000 |
| EGR4_P479_F    | 0.4827 | 0.7726 | 0.9573 | 0.0267 | 0.9944 | 0.9924 | 0.5292 | 0.0104 | 0.9842 | 0.8776 | 0.7672 | 0.9896 | 0.9791 | 0.0655 | 0.0273 |
| EIF2AK2_E103_R | 0.0000 | 0.0000 | 0.9793 | 0.0000 | 0.0000 | 0.0000 | 0.0000 | 0.0000 | 0.0000 | 0.9854 | 0.9739 | 0.0000 | 0.9802 | 0.0000 | 0.0000 |
| EIF2AK2_P313_F | 0.9942 | 0.8369 | 0.9858 | 0.3420 | 0.0072 | 0.0895 | 0.1723 | 0.9961 | 0.9907 | 0.8820 | 0.9882 | 0.9916 | 0.9865 | 0.0000 | 0.0000 |
| ELK1_E156_F    | 0.0000 | 0.0000 | 0.9202 | 0.0000 | 0.0106 | 0.0000 | 0.7837 | 0.0000 | 0.0000 | 0.0000 | 0.0000 | 0.0000 | 0.9514 | 0.0000 | 0.0000 |
| EMR3_P39_R     | 0.4918 | 0.0045 | 0.6325 | 0.4097 | 0.3804 | 0.3487 | 0.3773 | 0.0416 | 0.4770 | 0.4800 | 0.8899 | 0.4238 | 0.6122 | 0.3856 | 0.9932 |
| ENC1_P484_R    | 0.4311 | 0.6237 | 0.9822 | 0.0939 | 0.9953 | 0.0000 | 0.0000 | 0.0072 | 0.9877 | 0.9777 | 0.9850 | 0.9865 | 0.9846 | 0.0000 | 0.0000 |
| EPHA1_E46_R    | 0.1692 | 0.0838 | 0.4910 | 0.8433 | 0.9673 | 0.2634 | 0.2168 | 0.0207 | 0.0042 | 0.0067 | 0.6927 | 0.0171 | 0.2931 | 0.2274 | 0.0463 |
| EPHA1_P119_R   | 0.0086 | 0.0000 | 0.0924 | 0.0000 | 0.7583 | 0.0054 | 0.0064 | 0.0066 | 0.0000 | 0.0000 | 0.0052 | 0.0076 | 0.1031 | 0.0072 | 0.0071 |
| EPHA2_P203_F   | 0.0106 | 0.4529 | 0.4202 | 0.0078 | 0.0065 | 0.0017 | 0.0053 | 0.8788 | 0.0000 | 0.0000 | 0.0067 | 0.0031 | 0.1022 | 0.0097 | 0.0058 |
| EPHA3_E156_R   | 0.0040 | 0.0000 | 0.0001 | 0.0050 | 0.0000 | 0.0000 | 0.0025 | 0.0000 | 0.0000 | 0.0000 | 0.0033 | 0.0000 | 0.0000 | 0.0000 | 0.0000 |
| EPHA7_E6_F     | 0.0000 | 0.0000 | 0.5026 | 0.0000 | 0.0000 | 0.0000 | 0.9943 | 0.0023 | 0.3587 | 0.8420 | 0.4240 | 0.0000 | 0.5056 | 0.4787 | 0.0030 |
| EPHA7_P205_R   | 0.9950 | 0.4250 | 0.9887 | 0.0000 | 0.9894 | 0.9675 | 0.2156 | 0.9659 | 0.9573 | 0.9784 | 0.8479 | 0.9892 | 0.9869 | 0.0503 | 0.9850 |
| EPHA8_P256_F   | 0.1786 | 0.0000 | 0.0996 | 0.0946 | 0.0166 | 0.1779 | 0.1471 | 0.0168 | 0.0027 | 0.2339 | 0.0127 | 0.1565 | 0.0171 | 0.0155 | 0.0675 |
| EPHB1_P503_F   | 0.4834 | 0.0000 | 0.3019 | 0.0113 | 0.0086 | 0.0660 | 0.0069 | 0.0053 | 0.0000 | 0.0000 | 0.5375 | 0.0074 | 0.1579 | 0.0116 | 0.0042 |
| EPHB2_E297_F   | 0.7615 | 0.3356 | 0.0160 | 0.8670 | 0.0341 | 0.0816 | 0.8465 | 0.7940 | 0.0000 | 0.6680 | 0.2013 | 0.0321 | 0.0180 | 0.9262 | 0.7817 |
| EPHB2_P165_R   | 0.0112 | 0.0000 | 0.4536 | 0.0000 | 0.0000 | 0.0038 | 0.0000 | 0.0000 | 0.0000 | 0.0000 | 0.9769 | 0.0024 | 0.7188 | 0.0000 | 0.0000 |
| EPHB3_E0_F     | 0.0047 | 0.0000 | 0.0000 | 0.0000 | 0.0000 | 0.8726 | 0.0000 | 0.0000 | 0.0000 | 0.0000 | 0.9269 | 0.0010 | 0.5754 | 0.0000 | 0.6715 |
| EPHB3_P569_R   | 0.1128 | 0.3303 | 0.0204 | 0.2692 | 0.0206 | 0.2923 | 0.3443 | 0.0051 | 0.0000 | 0.0000 | 0.0215 | 0.2099 | 0.0099 | 0.0068 | 0.0702 |
| EPHB4_P313_R   | 0.7993 | 0.4108 | 0.2341 | 0.8005 | 0.0120 | 0.0000 | 0.7078 | 0.6804 | 0.5706 | 0.0000 | 0.2167 | 0.0385 | 0.2523 | 0.2788 | 0.4124 |
| EPHB6_E342_F   | 0.8036 | 0.0000 | 0.2727 | 0.0532 | 0.7840 | 0.0347 | 0.0553 | 0.7907 | 0.3735 | 0.0000 | 0.0780 | 0.8047 | 0.0518 | 0.5690 | 0.7490 |
| EPHB6_P827_R   | 0.0126 | 0.2983 | 0.0030 | 0.0000 | 0.0000 | 0.0077 | 0.0094 | 0.0000 | 0.4727 | 0.0000 | 0.0095 | 0.0040 | 0.3497 | 0.0000 | 0.0000 |
| EPHX1_P1358_R  | 0.9121 | 0.0000 | 0.9825 | 0.0000 | 0.0000 | 0.0000 | 0.0000 | 0.0043 | 0.9885 | 0.9690 | 0.8612 | 0.0076 | 0.9703 | 0.0051 | 0.9905 |
| EPM2A_P113_F   | 0.0541 | 0.9394 | 0.0403 | 0.8951 | 0.0793 | 0.8518 | 0.0700 | 0.8108 | 0.0343 | 0.7738 | 0.0270 | 0.7104 | 0.1773 | 0.0950 | 0.7982 |
| EPM2A_P64_R    | 0.3833 | 0.1073 | 0.0174 | 0.6535 | 0.3771 | 0.0281 | 0.5236 | 0.3878 | 0.0000 | 0.0000 | 0.0205 | 0.0136 | 0.0078 | 0.0365 | 0.0178 |
| EPO_E244_R     | 0.0050 | 0.4421 | 0.0263 | 0.0000 | 0.0000 | 0.0000 | 0.0000 | 0.0000 | 0.0000 | 0.0000 | 0.9593 | 0.6466 | 0.0000 | 0.0082 | 0.0007 |
| EPO_P162_R     | 0.0000 | 0.0000 | 0.2274 | 0.0000 | 0.0037 | 0.0051 | 0.0000 | 0.0000 | 0.0000 | 0.2260 | 0.0033 | 0.0000 | 0.0000 | 0.0048 | 0.0023 |
| EPS8_E231_F    | 0.0480 | 0.2735 | 0.9205 | 0.0000 | 0.1436 | 0.2222 | 0.1473 | 0.0679 | 0.9613 | 0.5780 | 0.0263 | 0.0000 | 0.9607 | 0.0000 | 0.0000 |
| EPS8_P437_F    | 0.0138 | 0.0000 | 0.7194 | 0.0000 | 0.0000 | 0.0000 | 0.0000 | 0.0031 | 0.0000 | 0.4327 | 0.0000 | 0.0069 | 0.0000 | 0.0000 | 0.0000 |
| ERBB2_P59_R    | 0.4843 | 0.0000 | 0.8302 | 0.0000 | 0.0000 | 0.0031 | 0.9949 | 0.7557 | 0.0000 | 0.7427 | 0.9741 | 0.9893 | 0.8678 | 0.9927 | 0.0000 |
| ERBB3_E331_F   | 0.9945 | 0.6237 | 0.6163 | 0.6606 | 0.6077 | 0.5415 | 0.6429 | 0.5903 | 0.0000 | 0.1520 | 0.0155 | 0.7770 | 0.4919 | 0.8610 | 0.0143 |
| ERBB3_P870_R   | 0.2111 | 0.0000 | 0.0120 | 0.0088 | 0.0140 | 0.0760 | 0.0000 | 0.2140 | 0.0000 | 0.0000 | 0.0266 | 0.1703 | 0.1278 | 0.0178 | 0.0000 |

|               |        |        |        |        |        |        |        |        |        |        |        |        |        |        |        |
|---------------|--------|--------|--------|--------|--------|--------|--------|--------|--------|--------|--------|--------|--------|--------|--------|
| ERBB4_P255_F  | 0.5476 | 0.0000 | 0.0185 | 0.1754 | 0.0065 | 0.0065 | 0.4249 | 0.5328 | 0.3104 | 0.0000 | 0.0164 | 0.4992 | 0.0169 | 0.0140 | 0.0158 |
| ERBB4_P541_F  | 0.0099 | 0.0000 | 0.8923 | 0.0000 | 0.9958 | 0.1381 | 0.0000 | 0.0114 | 0.6398 | 0.9276 | 0.7897 | 0.9865 | 0.8300 | 0.0000 | 0.0215 |
| ERCC1_P354_F  | 0.2683 | 0.6777 | 0.8677 | 0.0000 | 0.0000 | 0.8390 | 0.9939 | 0.6825 | 0.9883 | 0.6588 | 0.7661 | 0.9855 | 0.7677 | 0.0092 | 0.9951 |
| ERCC3_P1210_R | 0.1767 | 0.8227 | 0.7977 | 0.4976 | 0.3679 | 0.2726 | 0.2970 | 0.2530 | 0.9587 | 0.9882 | 0.7179 | 0.2945 | 0.9816 | 0.0288 | 0.8547 |
| ERG_E28_F     | 0.9903 | 0.7872 | 0.5708 | 0.0289 | 0.5181 | 0.0356 | 0.0264 | 0.0117 | 0.0212 | 0.7481 | 0.0246 | 0.0320 | 0.1875 | 0.0536 | 0.6687 |
| ERN1_P809_R   | 0.0579 | 0.2961 | 0.9366 | 0.1421 | 0.2179 | 0.9940 | 0.3030 | 0.0049 | 0.0191 | 0.0000 | 0.9802 | 0.0818 | 0.9843 | 0.2898 | 0.9912 |
| ESR1_E298_R   | 0.7659 | 0.9341 | 0.9595 | 0.0368 | 0.9957 | 0.0854 | 0.9954 | 0.7290 | 0.9401 | 0.0429 | 0.6920 | 0.7965 | 0.9643 | 0.1625 | 0.7295 |
| ESR1_P151_R   | 0.0109 | 0.0000 | 0.4374 | 0.2256 | 0.1276 | 0.0000 | 0.9944 | 0.9936 | 0.9749 | 0.0000 | 0.0138 | 0.9864 | 0.7165 | 0.0000 | 0.0041 |
| ESR2_E66_F    | 0.3306 | 0.1597 | 0.5805 | 0.4549 | 0.5276 | 0.4607 | 0.2521 | 0.3478 | 0.0460 | 0.3715 | 0.3391 | 0.6645 | 0.1674 | 0.1083 | 0.0550 |
| ESR2_P162_F   | 0.2170 | 0.1297 | 0.2350 | 0.3594 | 0.0236 | 0.2975 | 0.3067 | 0.2825 | 0.9343 | 0.0143 | 0.0314 | 0.0175 | 0.3543 | 0.0440 | 0.3117 |
| ETS1_E253_R   | 0.1308 | 0.1046 | 0.4136 | 0.1399 | 0.0254 | 0.0205 | 0.1297 | 0.0137 | 0.0000 | 0.0000 | 0.1603 | 0.0367 | 0.0223 | 0.2091 | 0.1127 |
| ETS1_P559_R   | 0.0000 | 0.0000 | 0.9756 | 0.0000 | 0.9946 | 0.9814 | 0.0000 | 0.0905 | 0.0000 | 0.9862 | 0.9796 | 0.9899 | 0.9839 | 0.0000 | 0.0000 |
| ETS2_P684_F   | 0.8247 | 0.8915 | 0.8328 | 0.6549 | 0.5913 | 0.0183 | 0.5736 | 0.0140 | 0.9845 | 0.7625 | 0.9261 | 0.3929 | 0.9323 | 0.0351 | 0.0092 |
| ETS2_P835_F   | 0.0444 | 0.0000 | 0.0052 | 0.0000 | 0.0000 | 0.0004 | 0.2490 | 0.0000 | 0.0000 | 0.0000 | 0.0036 | 0.0000 | 0.0000 | 0.1586 | 0.1574 |
| ETV1_P235_F   | 0.0065 | 0.0000 | 0.9763 | 0.9921 | 0.1762 | 0.0106 | 0.0024 | 0.6941 | 0.9144 | 0.8170 | 0.9762 | 0.3356 | 0.9758 | 0.0000 | 0.0000 |
| ETV1_P515_F   | 0.0000 | 0.0000 | 0.4000 | 0.0169 | 0.0058 | 0.0000 | 0.0000 | 0.0078 | 0.0000 | 0.0000 | 0.0084 | 0.0000 | 0.8915 | 0.0108 | 0.0101 |
| ETV6_E430_F   | 0.1990 | 0.0000 | 0.3534 | 0.0104 | 0.0658 | 0.0057 | 0.1068 | 0.0058 | 0.3284 | 0.7428 | 0.4400 | 0.3984 | 0.2165 | 0.0212 | 0.0078 |
| EVI1_E47_R    | 0.9913 | 0.4473 | 0.9410 | 0.9935 | 0.0179 | 0.5861 | 0.5435 | 0.5503 | 0.0000 | 0.0000 | 0.8620 | 0.1544 | 0.9448 | 0.3507 | 0.9901 |
| EVI1_P30_R    | 0.0078 | 0.0000 | 0.0512 | 0.0067 | 0.0084 | 0.0026 | 0.0099 | 0.9943 | 0.0000 | 0.1247 | 0.5030 | 0.0072 | 0.0645 | 0.4643 | 0.0000 |
| EVI2A_P94_R   | 0.0000 | 0.0000 | 0.0202 | 0.0000 | 0.0070 | 0.0000 | 0.2022 | 0.0000 | 0.4018 | 0.0000 | 0.0084 | 0.0000 | 0.0000 | 0.0115 | 0.0114 |
| EXT1_E197_F   | 0.3660 | 0.3116 | 0.1177 | 0.3038 | 0.4327 | 0.0104 | 0.2308 | 0.2797 | 0.0000 | 0.0000 | 0.3585 | 0.0151 | 0.3775 | 0.5658 | 0.8035 |
| EYA4_E277_F   | 0.1146 | 0.0000 | 0.1708 | 0.0000 | 0.2039 | 0.0079 | 0.0000 | 0.0000 | 0.0000 | 0.8636 | 0.0076 | 0.9889 | 0.0824 | 0.0000 | 0.0702 |
| EYA4_P508_F   | 0.0000 | 0.0000 | 0.6613 | 0.9945 | 0.0000 | 0.0000 | 0.0000 | 0.4525 | 0.0000 | 0.5671 | 0.3248 | 0.0000 | 0.9139 | 0.0068 | 0.0000 |
| EYA4_P794_F   | 0.0000 | 0.0000 | 0.7133 | 0.0000 | 0.0034 | 0.0000 | 0.1045 | 0.0000 | 0.0356 | 0.9851 | 0.6320 | 0.9901 | 0.8360 | 0.0180 | 0.0000 |
| F2R_P839_F    | 0.4563 | 0.0000 | 0.9838 | 0.0000 | 0.0000 | 0.0272 | 0.0086 | 0.8539 | 0.9729 | 0.9468 | 0.9072 | 0.9665 | 0.9811 | 0.0000 | 0.0000 |
| F2R_P88_F     | 0.0372 | 0.0000 | 0.7357 | 0.0091 | 0.0000 | 0.0030 | 0.0108 | 0.0019 | 0.0000 | 0.6185 | 0.3570 | 0.0000 | 0.9677 | 0.0000 | 0.0052 |
| FABP3_E113_F  | 0.6637 | 0.0000 | 0.5467 | 0.0106 | 0.7897 | 0.0045 | 0.0027 | 0.7198 | 0.6750 | 0.0000 | 0.4113 | 0.0081 | 0.5347 | 0.0000 | 0.0130 |
| FABP3_P598_F  | 0.6731 | 0.9983 | 0.2536 | 0.3480 | 0.8167 | 0.4079 | 0.9942 | 0.9060 | 0.5627 | 0.2958 | 0.2666 | 0.7468 | 0.4047 | 0.8420 | 0.9766 |
| FANCE_P356_R  | 0.0000 | 0.0000 | 0.6607 | 0.0000 | 0.0000 | 0.0017 | 0.0121 | 0.2039 | 0.5137 | 0.0000 | 0.0043 | 0.0000 | 0.7364 | 0.0000 | 0.0000 |
| FANCF_P13_F   | 0.6168 | 0.8621 | 0.8173 | 0.6797 | 0.7635 | 0.6322 | 0.6690 | 0.6207 | 0.0000 | 0.1054 | 0.5917 | 0.0883 | 0.6299 | 0.8024 | 0.6425 |
| FANCG_E207_R  | 0.0793 | 0.9905 | 0.0859 | 0.9748 | 0.1051 | 0.0786 | 0.9631 | 0.0394 | 0.2239 | 0.2463 | 0.0585 | 0.1157 | 0.0799 | 0.5798 | 0.2201 |
| FAS_P322_R    | 0.6152 | 0.0000 | 0.7776 | 0.9802 | 0.0000 | 0.0000 | 0.6475 | 0.0000 | 0.4212 | 0.9557 | 0.6516 | 0.1897 | 0.7686 | 0.0000 | 0.0273 |
| FASTK_P257_F  | 0.1062 | 0.0172 | 0.7634 | 0.0724 | 0.9143 | 0.0947 | 0.0963 | 0.0862 | 0.0415 | 0.7355 | 0.0883 | 0.0758 | 0.6074 | 0.0535 | 0.0945 |

|               |        |        |        |        |        |        |        |        |        |        |        |        |        |        |        |
|---------------|--------|--------|--------|--------|--------|--------|--------|--------|--------|--------|--------|--------|--------|--------|--------|
| FAT_P973_R    | 0.0990 | 0.0000 | 0.3510 | 0.0000 | 0.0000 | 0.0000 | 0.4910 | 0.2558 | 0.9274 | 0.0000 | 0.0197 | 0.0119 | 0.6430 | 0.0068 | 0.0000 |
| FER_P581_F    | 0.0867 | 0.6376 | 0.9428 | 0.3016 | 0.0629 | 0.1953 | 0.9930 | 0.9922 | 0.9798 | 0.2280 | 0.9708 | 0.2129 | 0.8882 | 0.1323 | 0.2258 |
| FES_P223_R    | 0.0000 | 0.0000 | 0.9650 | 0.0000 | 0.0000 | 0.0000 | 0.0000 | 0.0000 | 0.9803 | 0.9795 | 0.0000 | 0.0000 | 0.9713 | 0.0000 | 0.9865 |
| FGF1_E5_F     | 0.4215 | 0.0367 | 0.8985 | 0.1983 | 0.3242 | 0.1156 | 0.1120 | 0.1227 | 0.9785 | 0.8686 | 0.9679 | 0.7066 | 0.2931 | 0.1223 | 0.8220 |
| FGF12_E61_R   | 0.4012 | 0.2732 | 0.3669 | 0.2488 | 0.0067 | 0.0093 | 0.4691 | 0.0070 | 0.7523 | 0.0000 | 0.0175 | 0.0135 | 0.2189 | 0.2755 | 0.0113 |
| FGF12_P210_R  | 0.2514 | 0.0000 | 0.9834 | 0.4070 | 0.3716 | 0.4965 | 0.0000 | 0.9946 | 0.9879 | 0.9866 | 0.9851 | 0.9900 | 0.9805 | 0.9907 | 0.9896 |
| FGF2_P153_F   | 0.2040 | 0.1268 | 0.4412 | 0.1961 | 0.1913 | 0.0533 | 0.1954 | 0.0111 | 0.0000 | 0.5126 | 0.0255 | 0.0112 | 0.5017 | 0.0251 | 0.1790 |
| FGF2_P229_F   | 0.2530 | 0.6514 | 0.5565 | 0.4911 | 0.0408 | 0.0575 | 0.0339 | 0.0324 | 0.5055 | 0.0385 | 0.0470 | 0.2349 | 0.4281 | 0.9938 | 0.0368 |
| FGF3_E198_R   | 0.9906 | 0.9617 | 0.6545 | 0.9945 | 0.9926 | 0.9907 | 0.9931 | 0.9889 | 0.9721 | 0.9788 | 0.6502 | 0.9801 | 0.4280 | 0.9941 | 0.5515 |
| FGF3_P171_R   | 0.9865 | 0.0000 | 0.8711 | 0.0000 | 0.0000 | 0.0000 | 0.8201 | 0.9124 | 0.9848 | 0.5708 | 0.7927 | 0.7926 | 0.9628 | 0.0000 | 0.0000 |
| FGF5_E16_F    | 0.9943 | 0.4764 | 0.9472 | 0.9958 | 0.0000 | 0.0102 | 0.0000 | 0.0307 | 0.9426 | 0.5496 | 0.9751 | 0.0045 | 0.8171 | 0.9897 | 0.9942 |
| FGF5_P238_R   | 0.0000 | 0.0000 | 0.3333 | 0.0091 | 0.0015 | 0.3590 | 0.0065 | 0.0000 | 0.6053 | 0.4723 | 0.4522 | 0.5550 | 0.3926 | 0.0046 | 0.0000 |
| FGF6_E294_F   | 0.7643 | 0.9456 | 0.3448 | 0.0767 | 0.2259 | 0.7962 | 0.7399 | 0.1091 | 0.0168 | 0.9727 | 0.9750 | 0.6801 | 0.6806 | 0.0652 | 0.0525 |
| FGF7_P44_F    | 0.0000 | 0.0969 | 0.4700 | 0.0000 | 0.0108 | 0.0000 | 0.0000 | 0.0000 | 0.0000 | 0.0000 | 0.0000 | 0.0000 | 0.6752 | 0.0065 | 0.0000 |
| FGF8_E183_F   | 0.0875 | 0.6239 | 0.0543 | 0.1878 | 0.0000 | 0.0000 | 0.0000 | 0.0000 | 0.0000 | 0.0000 | 0.0182 | 0.1125 | 0.0000 | 0.1667 | 0.2384 |
| FGF8_P473_F   | 0.0000 | 0.0000 | 0.8463 | 0.0000 | 0.0020 | 0.0220 | 0.0000 | 0.9902 | 0.3672 | 0.9686 | 0.0000 | 0.0000 | 0.2640 | 0.0034 | 0.0000 |
| FGFR1_E317_F  | 0.0575 | 0.0000 | 0.0708 | 0.0000 | 0.0498 | 0.0210 | 0.2435 | 0.0813 | 0.0000 | 0.5868 | 0.0175 | 0.0105 | 0.4944 | 0.0000 | 0.0101 |
| FGFR2_P266_R  | 0.1600 | 0.4548 | 0.0141 | 0.0090 | 0.2280 | 0.0111 | 0.6427 | 0.0083 | 0.0000 | 0.0000 | 0.0140 | 0.3179 | 0.0040 | 0.0148 | 0.0076 |
| FGFR3_E297_R  | 0.9926 | 0.0000 | 0.6844 | 0.0000 | 0.0000 | 0.0000 | 0.9925 | 0.0079 | 0.9553 | 0.9820 | 0.0065 | 0.0000 | 0.9673 | 0.0000 | 0.0000 |
| FGFR3_P1152_R | 0.9911 | 0.6699 | 0.8402 | 0.9976 | 0.0039 | 0.3928 | 0.0041 | 0.9954 | 0.8112 | 0.8827 | 0.6616 | 0.7308 | 0.8864 | 0.9945 | 0.9945 |
| FHIT_E19_R    | 0.1609 | 0.3932 | 0.9799 | 0.0000 | 0.0000 | 0.0184 | 0.0000 | 0.0000 | 0.9841 | 0.9902 | 0.9341 | 0.0054 | 0.9821 | 0.0000 | 0.9941 |
| FHIT_P93_R    | 0.0000 | 0.0000 | 0.0736 | 0.0000 | 0.0040 | 0.0000 | 0.0053 | 0.0023 | 0.2084 | 0.9410 | 0.6115 | 0.0067 | 0.1625 | 0.0081 | 0.0000 |
| FHL1_E229_R   | 0.0055 | 0.0000 | 0.1388 | 0.0000 | 0.0000 | 0.0000 | 0.0000 | 0.0000 | 0.0000 | 0.0000 | 0.0024 | 0.0000 | 0.0697 | 0.0053 | 0.0000 |
| FLI1_P620_R   | 0.9952 | 0.0000 | 0.9755 | 0.0000 | 0.0000 | 0.0001 | 0.0000 | 0.0000 | 0.9378 | 0.9695 | 0.9802 | 0.6693 | 0.9531 | 0.0000 | 0.9859 |
| FLT1_E444_F   | 0.0145 | 0.5533 | 0.7309 | 0.8506 | 0.5140 | 0.9929 | 0.6941 | 0.0147 | 0.7035 | 0.4678 | 0.5624 | 0.0141 | 0.7111 | 0.0509 | 0.0177 |
| FLT1_P302_F   | 0.1407 | 0.0595 | 0.0210 | 0.0263 | 0.1078 | 0.0504 | 0.2116 | 0.1579 | 0.0000 | 0.0000 | 0.0292 | 0.0238 | 0.1301 | 0.0365 | 0.1896 |
| FLT1_P615_R   | 0.1145 | 0.0462 | 0.3050 | 0.2064 | 0.0126 | 0.0092 | 0.1710 | 0.0065 | 0.0000 | 0.0000 | 0.7018 | 0.0068 | 0.0379 | 0.4595 | 0.1184 |
| FLT3_E326_R   | 0.0157 | 0.0000 | 0.3917 | 0.3482 | 0.0100 | 0.0000 | 0.0000 | 0.0000 | 0.4368 | 0.0000 | 0.0100 | 0.0067 | 0.0784 | 0.0194 | 0.0056 |
| FLT4_P180_R   | 0.4257 | 0.0843 | 0.9736 | 0.0516 | 0.0304 | 0.8252 | 0.7536 | 0.8122 | 0.9850 | 0.8235 | 0.8798 | 0.9741 | 0.9817 | 0.9898 | 0.9617 |
| FMR1_P62_R    | 0.9172 | 0.7703 | 0.2291 | 0.9426 | 0.9369 | 0.6137 | 0.6763 | 0.9048 | 0.3379 | 0.8843 | 0.3574 | 0.9040 | 0.3361 | 0.9707 | 0.5616 |
| FN1_E469_F    | 0.0090 | 0.0000 | 0.2874 | 0.0000 | 0.0057 | 0.0021 | 0.0000 | 0.0000 | 0.0000 | 0.0000 | 0.0007 | 0.9880 | 0.0000 | 0.0038 | 0.0000 |
| FN1_P229_R    | 0.0242 | 0.0000 | 0.3380 | 0.2637 | 0.2402 | 0.0167 | 0.8366 | 0.0082 | 0.0005 | 0.1453 | 0.6351 | 0.7028 | 0.2086 | 0.0074 | 0.9403 |
| FOSL2_E384_R  | 0.9952 | 0.7721 | 0.9675 | 0.0000 | 0.8294 | 0.9951 | 0.9956 | 0.9078 | 0.9863 | 0.6552 | 0.9739 | 0.1082 | 0.9853 | 0.9125 | 0.9928 |

|                |        |        |        |        |        |        |        |        |        |        |        |        |        |        |        |
|----------------|--------|--------|--------|--------|--------|--------|--------|--------|--------|--------|--------|--------|--------|--------|--------|
| FRK_P36_F      | 0.0114 | 0.0000 | 0.0108 | 0.0140 | 0.0000 | 0.0169 | 0.0061 | 0.0979 | 0.0000 | 0.0000 | 0.0139 | 0.0247 | 0.0802 | 0.0000 | 0.0000 |
| FRZB_E186_R    | 0.0470 | 0.0000 | 0.9428 | 0.0000 | 0.0000 | 0.1259 | 0.0349 | 0.0000 | 0.8565 | 0.9737 | 0.0058 | 0.1471 | 0.9355 | 0.0000 | 0.0000 |
| FRZB_P406_F    | 0.0000 | 0.3206 | 0.0011 | 0.0000 | 0.0000 | 0.0000 | 0.0000 | 0.0000 | 0.0000 | 0.0000 | 0.0000 | 0.0000 | 0.0956 | 0.1923 | 0.0000 |
| FVT1_P225_F    | 0.0131 | 0.0000 | 0.2101 | 0.0096 | 0.2571 | 0.0089 | 0.0061 | 0.0055 | 0.0000 | 0.0000 | 0.6194 | 0.0055 | 0.1462 | 0.0084 | 0.0056 |
| FYN_P352_R     | 0.9927 | 0.9996 | 0.9475 | 0.9969 | 0.9960 | 0.9938 | 0.9969 | 0.9961 | 0.9843 | 0.9888 | 0.9186 | 0.9939 | 0.9882 | 0.9983 | 0.9926 |
| FZD7_E296_F    | 0.0266 | 0.0000 | 0.9727 | 0.0000 | 0.0000 | 0.0000 | 0.0000 | 0.9909 | 0.9827 | 0.0000 | 0.8393 | 0.0000 | 0.9780 | 0.9935 | 0.0000 |
| FZD9_E458_F    | 0.0000 | 0.0000 | 0.9612 | 0.0000 | 0.9929 | 0.0000 | 0.0000 | 0.0000 | 0.8851 | 0.0000 | 0.9044 | 0.0000 | 0.9648 | 0.0000 | 0.9903 |
| FZD9_P15_R     | 0.0115 | 0.1900 | 0.1230 | 0.3619 | 0.0252 | 0.0062 | 0.0000 | 0.0000 | 0.0000 | 0.0000 | 0.0070 | 0.0000 | 0.0000 | 0.0093 | 0.0000 |
| FZD9_P175_F    | 0.1456 | 0.0491 | 0.4803 | 0.6757 | 0.0141 | 0.0088 | 0.0098 | 0.0082 | 0.7530 | 0.3849 | 0.4058 | 0.1273 | 0.3895 | 0.0971 | 0.0057 |
| G6PD_E190_F    | 0.0000 | 0.0000 | 0.6588 | 0.0000 | 0.0000 | 0.0000 | 0.0000 | 0.0000 | 0.0000 | 0.0543 | 0.0030 | 0.9886 | 0.6139 | 0.9942 | 0.0000 |
| G6PD_P196_F    | 0.6915 | 0.8462 | 0.4985 | 0.7132 | 0.0178 | 0.6296 | 0.5878 | 0.5734 | 0.1521 | 0.6772 | 0.0134 | 0.5106 | 0.5085 | 0.7600 | 0.5672 |
| GABRB3_E42_F   | 0.0000 | 0.0000 | 0.0058 | 0.0008 | 0.0058 | 0.8848 | 0.0000 | 0.0000 | 0.0000 | 0.0000 | 0.0028 | 0.0073 | 0.0567 | 0.0000 | 0.0000 |
| GADD45A_P737_R | 0.3694 | 0.8349 | 0.2019 | 0.0365 | 0.0191 | 0.0207 | 0.8871 | 0.0197 | 0.0047 | 0.0341 | 0.0309 | 0.9902 | 0.0721 | 0.7912 | 0.0233 |
| GALR1_E52_F    | 0.3384 | 0.0000 | 0.0126 | 0.0301 | 0.0151 | 0.1689 | 0.4344 | 0.3120 | 0.9753 | 0.0000 | 0.0243 | 0.1819 | 0.0000 | 0.0098 | 0.4238 |
| GALR1_P80_F    | 0.0353 | 0.0000 | 0.0071 | 0.0000 | 0.3117 | 0.0120 | 0.0613 | 0.0000 | 0.0000 | 0.0000 | 0.0113 | 0.0065 | 0.0011 | 0.0112 | 0.0067 |
| GAS1_E22_F     | 0.0092 | 0.0000 | 0.0087 | 0.0127 | 0.0000 | 0.0664 | 0.0099 | 0.0000 | 0.0000 | 0.0000 | 0.0109 | 0.0061 | 0.0021 | 0.0137 | 0.0681 |
| GAS1_P754_R    | 0.0000 | 0.2955 | 0.0318 | 0.0000 | 0.0000 | 0.0000 | 0.0059 | 0.0009 | 0.0000 | 0.0000 | 0.0045 | 0.0016 | 0.0000 | 0.0000 | 0.0022 |
| GAS7_E148_F    | 0.5197 | 0.0000 | 0.0137 | 0.0137 | 0.0146 | 0.4471 | 0.5262 | 0.5729 | 0.0000 | 0.0000 | 0.0260 | 0.0181 | 0.0064 | 0.0000 | 0.0103 |
| GAS7_P622_R    | 0.0000 | 0.0000 | 0.0000 | 0.0000 | 0.0000 | 0.0000 | 0.0000 | 0.0000 | 0.0000 | 0.0000 | 0.0000 | 0.0000 | 0.0000 | 0.0000 | 0.0000 |
| GATA6_P21_R    | 0.0000 | 0.0000 | 0.0068 | 0.0000 | 0.0048 | 0.0072 | 0.0043 | 0.0030 | 0.0000 | 0.0000 | 0.2346 | 0.0042 | 0.0014 | 0.0124 | 0.0000 |
| GATA6_P726_F   | 0.1911 | 0.0000 | 0.0099 | 0.0454 | 0.1848 | 0.0198 | 0.0148 | 0.4171 | 0.0000 | 0.0000 | 0.0204 | 0.2226 | 0.0043 | 0.4147 | 0.0105 |
| GFI1_E136_F    | 0.2538 | 0.0000 | 0.3718 | 0.2356 | 0.1704 | 0.0000 | 0.0000 | 0.0000 | 0.0000 | 0.0000 | 0.0575 | 0.1421 | 0.0000 | 0.0040 | 0.0103 |
| GFI1_P45_R     | 0.0113 | 0.0000 | 0.0058 | 0.0098 | 0.0038 | 0.0029 | 0.0100 | 0.0049 | 0.0000 | 0.2614 | 0.0099 | 0.0054 | 0.0004 | 0.0000 | 0.0034 |
| GJB2_E43_F     | 0.1405 | 0.0000 | 0.0152 | 0.1206 | 0.0000 | 0.0066 | 0.0000 | 0.0060 | 0.0000 | 0.0000 | 0.0136 | 0.0122 | 0.2995 | 0.0000 | 0.1779 |
| GJB2_P791_R    | 0.2004 | 0.0623 | 0.0097 | 0.2392 | 0.0207 | 0.1845 | 0.1121 | 0.1182 | 0.0000 | 0.0016 | 0.0096 | 0.1121 | 0.0025 | 0.6170 | 0.1869 |
| GJB2_P931_R    | 0.3106 | 0.1432 | 0.0275 | 0.3805 | 0.3645 | 0.0510 | 0.3686 | 0.2842 | 0.0307 | 0.2171 | 0.6468 | 0.0220 | 0.0304 | 0.1054 | 0.3034 |
| GLA_P112_F     | 0.0270 | 0.1862 | 0.8198 | 0.0045 | 0.0090 | 0.3390 | 0.0000 | 0.0247 | 0.0000 | 0.9875 | 0.0494 | 0.0338 | 0.9064 | 0.0000 | 0.0193 |
| GLI2_E90_F     | 0.0855 | 0.0000 | 0.9797 | 0.0000 | 0.0000 | 0.9874 | 0.0000 | 0.0000 | 0.9830 | 0.9872 | 0.9773 | 0.9937 | 0.9840 | 0.0000 | 0.9936 |
| GLI3_E148_R    | 0.1579 | 0.0685 | 0.9622 | 0.1100 | 0.9862 | 0.9845 | 0.0788 | 0.9781 | 0.9857 | 0.9389 | 0.7858 | 0.1028 | 0.9754 | 0.2259 | 0.8257 |
| GML_P281_R     | 0.9947 | 0.6393 | 0.8867 | 0.9962 | 0.0000 | 0.0000 | 0.0000 | 0.0000 | 0.8833 | 0.9893 | 0.7530 | 0.9888 | 0.9763 | 0.0000 | 0.9919 |
| GNAS_E58_F     | 0.9165 | 0.4679 | 0.9534 | 0.0000 | 0.0000 | 0.0029 | 0.0000 | 0.0000 | 0.0000 | 0.0000 | 0.4435 | 0.0070 | 0.9780 | 0.0000 | 0.0000 |
| GP1BB_E23_F    | 0.0104 | 0.0000 | 0.0083 | 0.0125 | 0.9948 | 0.0020 | 0.0063 | 0.0989 | 0.0000 | 0.0000 | 0.0088 | 0.0059 | 0.0013 | 0.0053 | 0.0053 |
| GPC3_P235_R    | 0.0000 | 0.4331 | 0.4290 | 0.0000 | 0.0084 | 0.0053 | 0.0000 | 0.0000 | 0.0000 | 0.0000 | 0.0071 | 0.0053 | 0.6001 | 0.0056 | 0.0000 |

|                     |        |        |        |        |        |        |        |        |        |        |        |        |        |        |        |
|---------------------|--------|--------|--------|--------|--------|--------|--------|--------|--------|--------|--------|--------|--------|--------|--------|
| GPR116_E328_R       | 0.9940 | 0.4965 | 0.9866 | 0.0000 | 0.9965 | 0.0000 | 0.0000 | 0.9933 | 0.9910 | 0.9893 | 0.9856 | 0.9848 | 0.9845 | 0.0000 | 0.9914 |
| GPX1_E46_R          | 0.0123 | 0.0000 | 0.0061 | 0.1308 | 0.0416 | 0.0044 | 0.0748 | 0.2204 | 0.0000 | 0.0000 | 0.0116 | 0.1721 | 0.0033 | 0.2193 | 0.0819 |
| GPX1_P194_F         | 0.4962 | 0.3584 | 0.4462 | 0.8168 | 0.1439 | 0.9945 | 0.5212 | 0.0312 | 0.0000 | 0.0167 | 0.7829 | 0.3518 | 0.1504 | 0.0924 | 0.4260 |
| GPX3_E178_F         | 0.0140 | 0.0448 | 0.1730 | 0.0106 | 0.0137 | 0.0106 | 0.0104 | 0.0096 | 0.1221 | 0.2245 | 0.2672 | 0.0131 | 0.1593 | 0.0132 | 0.0119 |
| GRB10_E85_R         | 0.0149 | 0.5733 | 0.0077 | 0.0087 | 0.0000 | 0.0061 | 0.0105 | 0.0102 | 0.0000 | 0.0000 | 0.0070 | 0.0000 | 0.0000 | 0.0074 | 0.0001 |
| GRB10_P260_F        | 0.2807 | 0.0000 | 0.0000 | 0.0000 | 0.0845 | 0.0227 | 0.1737 | 0.3069 | 0.0000 | 0.0000 | 0.0205 | 0.0061 | 0.0000 | 0.0133 | 0.0099 |
| GRB10_P496_R        | 0.0000 | 0.7353 | 0.1598 | 0.3978 | 0.2281 | 0.2726 | 0.0000 | 0.0000 | 0.0000 | 0.0000 | 0.4033 | 0.0104 | 0.2757 | 0.0231 | 0.0925 |
| GRPR_P200_R         | 0.1939 | 0.1914 | 0.9415 | 0.2269 | 0.1700 | 0.1607 | 0.2164 | 0.1764 | 0.6324 | 0.7363 | 0.1992 | 0.9812 | 0.8795 | 0.2924 | 0.1773 |
| GSTM1_P363_F        | 0.0913 | 0.0676 | 0.5413 | 0.1650 | 0.2371 | 0.1167 | 0.0334 | 0.0604 | 0.9782 | 0.0000 | 0.7226 | 0.0056 | 0.9449 | 0.1407 | 0.0000 |
| GSTM2_E153_F        | 0.0070 | 0.0000 | 0.2060 | 0.0000 | 0.0042 | 0.0000 | 0.0049 | 0.0000 | 0.0000 | 0.0000 | 0.0046 | 0.0041 | 0.0830 | 0.6452 | 0.0008 |
| GSTM2_P109_R        | 0.0000 | 0.0000 | 0.0212 | 0.0103 | 0.0000 | 0.0025 | 0.0000 | 0.0000 | 0.0000 | 0.0000 | 0.0000 | 0.0038 | 0.0000 | 0.0000 | 0.0000 |
| GSTM2_P453_R        | 0.0912 | 0.0000 | 0.8451 | 0.0000 | 0.0000 | 0.9277 | 0.0000 | 0.0063 | 0.9681 | 0.8778 | 0.9833 | 0.0005 | 0.7426 | 0.0000 | 0.0007 |
| GSTP1_E322_R        | 0.0000 | 0.0000 | 0.1204 | 0.0000 | 0.0000 | 0.0000 | 0.0069 | 0.0000 | 0.0000 | 0.0000 | 0.0139 | 0.0058 | 0.1039 | 0.0000 | 0.2825 |
| GSTP1_P74_F         | 0.2697 | 0.7347 | 0.2693 | 0.0590 | 0.1601 | 0.0163 | 0.1433 | 0.2474 | 0.0000 | 0.0000 | 0.2607 | 0.0526 | 0.1197 | 0.0000 | 0.0250 |
| GSTP1_seq_38_S153_R | 0.0000 | 0.0000 | 0.0102 | 0.0000 | 0.0000 | 0.0000 | 0.0000 | 0.0000 | 0.0000 | 0.0000 | 0.0086 | 0.0000 | 0.0000 | 0.0000 | 0.0000 |
| GUCY2D_E419_R       | 0.0000 | 0.0000 | 0.0017 | 0.0000 | 0.0000 | 0.0020 | 0.0000 | 0.0029 | 0.0000 | 0.0000 | 0.0071 | 0.0146 | 0.1813 | 0.0238 | 0.0048 |
| HBEGF_P32_R         | 0.0000 | 0.0000 | 0.0012 | 0.0000 | 0.0000 | 0.0023 | 0.0000 | 0.0000 | 0.0000 | 0.0000 | 0.0036 | 0.0144 | 0.0000 | 0.0000 | 0.0041 |
| HBII-13_E48_F       | 0.0000 | 0.0000 | 0.9599 | 0.0000 | 0.0000 | 0.0000 | 0.0062 | 0.0000 | 0.0000 | 0.9707 | 0.7084 | 0.8566 | 0.9635 | 0.0000 | 0.9896 |
| HBII-52_P563_F      | 0.0426 | 0.1520 | 0.7971 | 0.6984 | 0.6775 | 0.0743 | 0.6112 | 0.0335 | 0.0569 | 0.0310 | 0.4500 | 0.5721 | 0.9143 | 0.0396 | 0.7194 |
| HCK_P46_R           | 0.0417 | 0.0000 | 0.0760 | 0.0000 | 0.0000 | 0.0130 | 0.0000 | 0.0000 | 0.0000 | 0.0000 | 0.0180 | 0.0000 | 0.0007 | 0.0188 | 0.0135 |
| HCK_P858_F          | 0.5190 | 0.2183 | 0.0102 | 0.6956 | 0.0228 | 0.6200 | 0.6542 | 0.0198 | 0.0000 | 0.7950 | 0.0446 | 0.0353 | 0.0063 | 0.8571 | 0.0374 |
| HDAC1_P414_R        | 0.0000 | 0.0000 | 0.3725 | 0.0133 | 0.0089 | 0.0080 | 0.0000 | 0.0048 | 0.0000 | 0.0000 | 0.0083 | 0.0048 | 0.2776 | 0.0000 | 0.1122 |
| HDAC11_P556_F       | 0.0000 | 0.0000 | 0.0023 | 0.0125 | 0.0104 | 0.0000 | 0.0072 | 0.0000 | 0.0000 | 0.0000 | 0.0048 | 0.0000 | 0.0000 | 0.4304 | 0.0044 |
| HDAC9_P137_R        | 0.0018 | 0.0000 | 0.1434 | 0.0000 | 0.0000 | 0.0000 | 0.0000 | 0.0000 | 0.0000 | 0.0000 | 0.8690 | 0.0028 | 0.0894 | 0.0000 | 0.0000 |
| HFE_E273_R          | 0.0000 | 0.0000 | 0.0004 | 0.0000 | 0.0066 | 0.0000 | 0.0000 | 0.0041 | 0.0000 | 0.0000 | 0.0061 | 0.0000 | 0.0000 | 0.5719 | 0.0000 |
| HHIP_P307_R         | 0.1939 | 0.0312 | 0.0218 | 0.0564 | 0.0183 | 0.0460 | 0.0140 | 0.0234 | 0.0144 | 0.0226 | 0.2844 | 0.0598 | 0.0220 | 0.0389 | 0.0371 |
| HIC1_E151_F         | 0.0000 | 0.0000 | 0.2429 | 0.0000 | 0.0000 | 0.0000 | 0.0000 | 0.0000 | 0.0000 | 0.0000 | 0.0000 | 0.0000 | 0.2222 | 0.0000 | 0.0000 |
| HIC1_P565_R         | 0.0246 | 0.0000 | 0.0094 | 0.0000 | 0.0070 | 0.0000 | 0.0000 | 0.0081 | 0.0000 | 0.0000 | 0.0246 | 0.0000 | 0.0025 | 0.0107 | 0.0000 |
| HIC2_P498_F         | 0.0000 | 0.0000 | 0.0046 | 0.0084 | 0.0092 | 0.0048 | 0.0000 | 0.0000 | 0.0000 | 0.0000 | 0.0065 | 0.0071 | 0.0000 | 0.0000 | 0.0000 |
| HIC2_P528_R         | 0.0000 | 0.0000 | 0.0488 | 0.0212 | 0.0138 | 0.0090 | 0.0148 | 0.0000 | 0.0000 | 0.0000 | 0.0152 | 0.0053 | 0.0000 | 0.0202 | 0.0081 |
| HIF1A_P488_F        | 0.0000 | 0.0000 | 0.0026 | 0.0000 | 0.0000 | 0.0000 | 0.0000 | 0.0093 | 0.0000 | 0.0000 | 0.0085 | 0.0000 | 0.0000 | 0.0000 | 0.0071 |
| HLA-DOB_P357_R      | 0.9913 | 0.0000 | 0.9769 | 0.9955 | 0.0000 | 0.9874 | 0.0000 | 0.9895 | 0.9844 | 0.9735 | 0.9347 | 0.0000 | 0.9763 | 0.9781 | 0.9922 |
| HLA-DPA1_P205_R     | 0.0091 | 0.0000 | 0.1024 | 0.1434 | 0.1177 | 0.1552 | 0.1329 | 0.1552 | 0.0000 | 0.0000 | 0.0141 | 0.9890 | 0.0077 | 0.4858 | 0.1395 |



|                 |        |        |        |        |        |        |        |        |        |        |        |        |        |        |        |
|-----------------|--------|--------|--------|--------|--------|--------|--------|--------|--------|--------|--------|--------|--------|--------|--------|
| HLA-DPA1_P28_R  | 0.0075 | 0.0000 | 0.1718 | 0.0000 | 0.0000 | 0.0029 | 0.0000 | 0.0000 | 0.0000 | 0.0000 | 0.0091 | 0.0000 | 0.0000 | 0.0095 | 0.0000 |
| HLA-DPB1_E2_R   | 0.0535 | 0.0000 | 0.4063 | 0.0739 | 0.2877 | 0.0475 | 0.5408 | 0.0219 | 0.0000 | 0.0000 | 0.0347 | 0.0371 | 0.0273 | 0.0000 | 0.0485 |
| HLA-DRA_P132_R  | 0.0000 | 0.0000 | 0.1393 | 0.0000 | 0.0000 | 0.0000 | 0.0000 | 0.0011 | 0.0000 | 0.0000 | 0.0000 | 0.0000 | 0.0000 | 0.0000 | 0.0000 |
| HLA-F_E402_F    | 0.0000 | 0.0000 | 0.0000 | 0.0000 | 0.0000 | 0.0000 | 0.0006 | 0.0000 | 0.0000 | 0.0000 | 0.0000 | 0.0000 | 0.0000 | 0.0031 | 0.0000 |
| HLF_E192_F      | 0.6177 | 0.5196 | 0.0123 | 0.0322 | 0.7062 | 0.0286 | 0.0237 | 0.5608 | 0.0012 | 0.3623 | 0.0195 | 0.0248 | 0.0096 | 0.0636 | 0.0299 |
| HOXA11_E35_F    | 0.0000 | 0.0000 | 0.0018 | 0.0000 | 0.0079 | 0.0000 | 0.1259 | 0.0000 | 0.0807 | 0.0000 | 0.0026 | 0.0039 | 0.0457 | 0.0045 | 0.0064 |
| HOXA11_P698_F   | 0.5799 | 0.9047 | 0.0170 | 0.7403 | 0.6702 | 0.1643 | 0.6602 | 0.5083 | 0.0000 | 0.0000 | 0.0274 | 0.4893 | 0.0098 | 0.7956 | 0.5822 |
| HOXA5_E187_F    | 0.9943 | 0.0000 | 0.9830 | 0.0000 | 0.0000 | 0.9100 | 0.0043 | 0.0015 | 0.9859 | 0.9898 | 0.9734 | 0.9873 | 0.9782 | 0.0000 | 0.0000 |
| HOXA9_E252_R    | 0.0164 | 0.0000 | 0.0091 | 0.0000 | 0.0000 | 0.0529 | 0.0000 | 0.0000 | 0.0000 | 0.0000 | 0.0169 | 0.0000 | 0.1648 | 0.0098 | 0.0115 |
| HOXA9_P1141_R   | 0.1943 | 0.0521 | 0.0207 | 0.0225 | 0.1664 | 0.0226 | 0.1900 | 0.0089 | 0.1739 | 0.0000 | 0.0366 | 0.1832 | 0.0114 | 0.0134 | 0.0132 |
| HOXA9_P303_F    | 0.0000 | 0.0000 | 0.0000 | 0.0000 | 0.0030 | 0.0000 | 0.0000 | 0.0000 | 0.0000 | 0.0000 | 0.0028 | 0.0009 | 0.0000 | 0.0040 | 0.0000 |
| HOXB13_E21_F    | 0.0069 | 0.0000 | 0.0044 | 0.0087 | 0.0047 | 0.0020 | 0.0000 | 0.0037 | 0.0000 | 0.0000 | 0.1180 | 0.0039 | 0.0236 | 0.0056 | 0.0000 |
| HOXB13_P17_R    | 0.0064 | 0.0000 | 0.2602 | 0.0000 | 0.0030 | 0.0000 | 0.0000 | 0.0000 | 0.0000 | 0.1808 | 0.0061 | 0.0000 | 0.0747 | 0.0008 | 0.0000 |
| HOXC6_P456_R    | 0.5373 | 0.5634 | 0.2137 | 0.0461 | 0.6858 | 0.5560 | 0.4158 | 0.4474 | 0.0229 | 0.0472 | 0.0613 | 0.0318 | 0.1399 | 0.2089 | 0.5895 |
| HPN_P374_R      | 0.0000 | 0.2621 | 0.2909 | 0.0000 | 0.0000 | 0.0000 | 0.0000 | 0.0045 | 0.0000 | 0.0000 | 0.0042 | 0.0000 | 0.2752 | 0.5926 | 0.0000 |
| HPN_P823_F      | 0.0062 | 0.0000 | 0.8688 | 0.0000 | 0.0000 | 0.0031 | 0.7286 | 0.9926 | 0.0000 | 0.0000 | 0.0000 | 0.9870 | 0.5143 | 0.0011 | 0.0019 |
| HPSE_P29_F      | 0.0312 | 0.8715 | 0.0201 | 0.7277 | 0.0282 | 0.5343 | 0.5315 | 0.0207 | 0.0000 | 0.0000 | 0.0266 | 0.0221 | 0.0595 | 0.9838 | 0.0173 |
| HPSE_P93_F      | 0.0093 | 0.1717 | 0.1380 | 0.0000 | 0.0000 | 0.0000 | 0.0000 | 0.0058 | 0.0000 | 0.0000 | 0.0394 | 0.0000 | 0.0000 | 0.0000 | 0.0040 |
| HRASLS_E72_R    | 0.0061 | 0.0000 | 0.0007 | 0.0000 | 0.0000 | 0.0000 | 0.0000 | 0.0008 | 0.0000 | 0.0000 | 0.0020 | 0.0021 | 0.1799 | 0.0024 | 0.0000 |
| HS3ST2_E145_R   | 0.0000 | 0.0000 | 0.0000 | 0.0000 | 0.0000 | 0.0000 | 0.0041 | 0.0000 | 0.0000 | 0.0000 | 0.0064 | 0.0007 | 0.0647 | 0.0088 | 0.0012 |
| HS3ST2_P546_F   | 0.0073 | 0.0000 | 0.0936 | 0.0108 | 0.0095 | 0.0023 | 0.0000 | 0.0000 | 0.0000 | 0.0000 | 0.0114 | 0.0013 | 0.0000 | 0.0062 | 0.0000 |
| HSD17B12_E145_R | 0.3285 | 0.0000 | 0.0154 | 0.1488 | 0.0000 | 0.0047 | 0.2335 | 0.5025 | 0.0000 | 0.0000 | 0.0209 | 0.0261 | 0.0109 | 0.9753 | 0.0000 |
| HTR1B_P222_F    | 0.0000 | 0.5275 | 0.0000 | 0.1087 | 0.0065 | 0.0000 | 0.0042 | 0.0000 | 0.0000 | 0.0000 | 0.0042 | 0.0000 | 0.0000 | 0.1554 | 0.0196 |
| HTR2A_P853_F    | 0.0098 | 0.4784 | 0.1721 | 0.0000 | 0.0049 | 0.0069 | 0.0000 | 0.0054 | 0.0000 | 0.0000 | 0.0046 | 0.0071 | 0.0000 | 0.0000 | 0.0036 |
| IAPP_E280_F     | 0.0053 | 0.0000 | 0.9759 | 0.0000 | 0.0000 | 0.0000 | 0.0000 | 0.9712 | 0.8625 | 0.9839 | 0.9225 | 0.9880 | 0.9741 | 0.0000 | 0.0000 |
| ICA1_P61_F      | 0.0000 | 0.0000 | 0.0000 | 0.0285 | 0.0000 | 0.0000 | 0.0211 | 0.0118 | 0.0000 | 0.0000 | 0.0000 | 0.0000 | 0.0000 | 0.0000 | 0.0062 |
| ICA1_P72_R      | 0.0000 | 0.0000 | 0.0000 | 0.0000 | 0.0000 | 0.0040 | 0.0068 | 0.0029 | 0.5912 | 0.0000 | 0.0044 | 0.0000 | 0.0000 | 0.0137 | 0.0021 |
| ICAM1_E242_F    | 0.4422 | 0.0000 | 0.0127 | 0.4292 | 0.0115 | 0.0106 | 0.2972 | 0.2071 | 0.0000 | 0.0000 | 0.0122 | 0.0118 | 0.1522 | 0.1039 | 0.7810 |
| ICAM1_P119_R    | 0.0000 | 0.0000 | 0.0004 | 0.0000 | 0.2731 | 0.0000 | 0.0070 | 0.0000 | 0.7057 | 0.0000 | 0.0062 | 0.0022 | 0.0543 | 0.0087 | 0.0010 |
| ICAM1_P386_R    | 0.0000 | 0.0000 | 0.0000 | 0.0000 | 0.0000 | 0.0000 | 0.0071 | 0.0056 | 0.0000 | 0.0000 | 0.0091 | 0.0000 | 0.0000 | 0.0000 | 0.0000 |
| ID1_P659_R      | 0.0000 | 0.0214 | 0.0039 | 0.0000 | 0.0055 | 0.0000 | 0.0000 | 0.0009 | 0.0000 | 0.0000 | 0.0052 | 0.0000 | 0.0000 | 0.0000 | 0.0039 |
| IFNG_P459_R     | 0.0504 | 0.2812 | 0.9768 | 0.9956 | 0.2994 | 0.2263 | 0.4543 | 0.1935 | 0.8994 | 0.9693 | 0.8120 | 0.8872 | 0.9780 | 0.1675 | 0.9925 |
| IFNGR1_P307_F   | 0.1456 | 0.1945 | 0.0093 | 0.1484 | 0.1235 | 0.0092 | 0.0105 | 0.0339 | 0.0000 | 0.0000 | 0.0108 | 0.0098 | 0.0775 | 0.2029 | 0.0111 |

|                |        |        |        |        |        |        |        |        |        |        |        |        |        |        |        |
|----------------|--------|--------|--------|--------|--------|--------|--------|--------|--------|--------|--------|--------|--------|--------|--------|
| IFNGR2_E164_F  | 0.0149 | 0.0000 | 0.1341 | 0.0232 | 0.0338 | 0.0185 | 0.1115 | 0.1295 | 0.0177 | 0.0578 | 0.0292 | 0.0482 | 0.0218 | 0.0128 | 0.1175 |
| IFNGR2_P377_R  | 0.0000 | 0.0000 | 0.2788 | 0.9960 | 0.0000 | 0.0016 | 0.0000 | 0.0000 | 0.9522 | 0.0000 | 0.8809 | 0.0000 | 0.1071 | 0.0000 | 0.9161 |
| IGF1_E394_F    | 0.7861 | 0.0000 | 0.9348 | 0.0043 | 0.0092 | 0.0000 | 0.0000 | 0.9946 | 0.8985 | 0.5777 | 0.6183 | 0.0083 | 0.8954 | 0.7494 | 0.8906 |
| IGF1_P933_F    | 0.1896 | 0.0000 | 0.2697 | 0.0000 | 0.0000 | 0.0000 | 0.0051 | 0.0000 | 0.5675 | 0.8463 | 0.9573 | 0.0000 | 0.4407 | 0.0000 | 0.9903 |
| IGF1R_E186_R   | 0.0000 | 0.0000 | 0.0000 | 0.0086 | 0.0000 | 0.0000 | 0.0040 | 0.0000 | 0.0000 | 0.0000 | 0.0043 | 0.0000 | 0.0000 | 0.0000 | 0.0014 |
| IGF1R_P325_R   | 0.1751 | 0.5281 | 0.0136 | 0.3896 | 0.4506 | 0.3675 | 0.5873 | 0.0108 | 0.0000 | 0.0000 | 0.0168 | 0.4583 | 0.0059 | 0.5986 | 0.3301 |
| IGF2_E134_R    | 0.0000 | 0.0000 | 0.0000 | 0.0000 | 0.0000 | 0.0070 | 0.0028 | 0.0000 | 0.0000 | 0.0000 | 0.0020 | 0.0000 | 0.0000 | 0.0119 | 0.0000 |
| IGF2_P1036_R   | 0.0276 | 0.1133 | 0.1099 | 0.0864 | 0.0079 | 0.9777 | 0.0104 | 0.0104 | 0.0028 | 0.5902 | 0.0152 | 0.0109 | 0.0534 | 0.0144 | 0.0068 |
| IGF2_P36_R     | 0.1216 | 0.0142 | 0.0151 | 0.1188 | 0.7662 | 0.0694 | 0.4342 | 0.0000 | 0.0000 | 0.0000 | 0.1224 | 0.1421 | 0.0052 | 0.4091 | 0.1073 |
| IGF2AS_P203_F  | 0.0000 | 0.0000 | 0.4285 | 0.0000 | 0.0000 | 0.0000 | 0.0000 | 0.0000 | 0.0000 | 0.0000 | 0.0000 | 0.0000 | 0.0000 | 0.0000 | 0.0000 |
| IGF2R_P396_R   | 0.9530 | 0.8949 | 0.1015 | 0.3307 | 0.2930 | 0.9655 | 0.6652 | 0.9387 | 0.1786 | 0.2525 | 0.0951 | 0.2821 | 0.2008 | 0.9896 | 0.1611 |
| IGFBP1_E48_R   | 0.0000 | 0.0000 | 0.5874 | 0.0128 | 0.0089 | 0.0000 | 0.0060 | 0.7978 | 0.0000 | 0.0000 | 0.0087 | 0.0050 | 0.0000 | 0.0227 | 0.0154 |
| IGFBP1_P12_R   | 0.0087 | 0.8639 | 0.4167 | 0.4179 | 0.0093 | 0.0297 | 0.0162 | 0.0031 | 0.0000 | 0.0000 | 0.0134 | 0.3577 | 0.0000 | 0.5744 | 0.5022 |
| IGFBP2_P306_F  | 0.0000 | 0.0044 | 0.0000 | 0.0090 | 0.0072 | 0.0000 | 0.0034 | 0.0071 | 0.0000 | 0.0000 | 0.0000 | 0.0000 | 0.0543 | 0.0036 | 0.0000 |
| IGFBP3_E65_R   | 0.5370 | 0.2199 | 0.0132 | 0.5267 | 0.0192 | 0.0095 | 0.0165 | 0.4702 | 0.0000 | 0.0000 | 0.0128 | 0.0183 | 0.0116 | 0.0148 | 0.0111 |
| IGFBP3_P1035_F | 0.0000 | 0.0000 | 0.0000 | 0.0000 | 0.0000 | 0.0000 | 0.0000 | 0.0020 | 0.0000 | 0.0000 | 0.0026 | 0.0000 | 0.0000 | 0.0000 | 0.0000 |
| IGFBP3_P423_R  | 0.1494 | 0.0000 | 0.0102 | 0.0967 | 0.0093 | 0.1129 | 0.0047 | 0.0060 | 0.0000 | 0.0000 | 0.0108 | 0.0042 | 0.0228 | 0.0696 | 0.1274 |
| IGFBP7_P371_F  | 0.4533 | 0.0000 | 0.0045 | 0.4383 | 0.0093 | 0.1433 | 0.0099 | 0.0180 | 0.0000 | 0.0000 | 0.0122 | 0.0047 | 0.0000 | 0.0169 | 0.0102 |
| IGSF4_P454_F   | 0.0000 | 0.5123 | 0.0481 | 0.0000 | 0.0074 | 0.0051 | 0.0000 | 0.0000 | 0.0000 | 0.0000 | 0.0069 | 0.0103 | 0.0002 | 0.0090 | 0.0000 |
| IGSF4_P86_R    | 0.2460 | 0.9917 | 0.0280 | 0.0099 | 0.0163 | 0.1349 | 0.7013 | 0.0056 | 0.0000 | 0.0000 | 0.0236 | 0.0116 | 0.0122 | 0.2236 | 0.2788 |
| IGSF4C_E65_F   | 0.9956 | 0.3565 | 0.8906 | 0.0000 | 0.0000 | 0.9962 | 0.0000 | 0.9951 | 0.9810 | 0.0000 | 0.7367 | 0.0000 | 0.9285 | 0.0070 | 0.7506 |
| IGSF4C_P533_R  | 0.0425 | 0.0000 | 0.0757 | 0.0000 | 0.0000 | 0.0070 | 0.0000 | 0.0000 | 0.0000 | 0.0000 | 0.0106 | 0.0086 | 0.0015 | 0.0091 | 0.0183 |
| IHH_E186_F     | 0.0000 | 0.0000 | 0.0031 | 0.0000 | 0.0000 | 0.0042 | 0.0060 | 0.0000 | 0.0000 | 0.0000 | 0.0007 | 0.0026 | 0.0000 | 0.0000 | 0.0030 |
| IHH_P246_R     | 0.0000 | 0.0000 | 0.3258 | 0.0000 | 0.0144 | 0.0245 | 0.6264 | 0.0840 | 0.0000 | 0.0000 | 0.0119 | 0.3188 | 0.0812 | 0.0000 | 0.0252 |
| IHH_P529_F     | 0.1077 | 0.4703 | 0.0096 | 0.0121 | 0.0000 | 0.0000 | 0.1193 | 0.0057 | 0.0000 | 0.0000 | 0.0137 | 0.0129 | 0.0014 | 0.0000 | 0.0052 |
| IL10_P85_F     | 0.0000 | 0.0000 | 0.2818 | 0.0000 | 0.0026 | 0.0012 | 0.9889 | 0.0000 | 0.0000 | 0.0000 | 0.0026 | 0.5029 | 0.1791 | 0.0000 | 0.0000 |
| IL11_P11_R     | 0.0000 | 0.0000 | 0.0088 | 0.0709 | 0.0000 | 0.0072 | 0.0000 | 0.0000 | 0.0000 | 0.0000 | 0.0175 | 0.0054 | 0.0000 | 0.0000 | 0.0000 |
| IL12A_E287_R   | 0.0000 | 0.0000 | 0.0335 | 0.0000 | 0.0000 | 0.0019 | 0.0000 | 0.0000 | 0.0000 | 0.0000 | 0.0059 | 0.0069 | 0.0000 | 0.0000 | 0.0023 |
| IL12B_P392_R   | 0.0088 | 0.0027 | 0.6663 | 0.0053 | 0.0038 | 0.0042 | 0.1142 | 0.0026 | 0.0000 | 0.1690 | 0.0005 | 0.0015 | 0.1544 | 0.0020 | 0.0019 |
| IL13_E75_R     | 0.9943 | 0.6793 | 0.9741 | 0.8290 | 0.7481 | 0.7561 | 0.6871 | 0.7519 | 0.6028 | 0.9799 | 0.7300 | 0.9854 | 0.9847 | 0.9233 | 0.6794 |
| IL17RB_E164_R  | 0.0000 | 0.0000 | 0.0053 | 0.0043 | 0.0000 | 0.0061 | 0.0830 | 0.0000 | 0.0000 | 0.0000 | 0.0000 | 0.0049 | 0.1844 | 0.0000 | 0.0000 |
| IL17RB_P788_R  | 0.0063 | 0.0000 | 0.0000 | 0.0000 | 0.9951 | 0.0000 | 0.0000 | 0.0000 | 0.7045 | 0.0000 | 0.0000 | 0.0000 | 0.0000 | 0.0000 | 0.0000 |
| IL18BP_P51_R   | 0.0301 | 0.2356 | 0.0264 | 0.3014 | 0.2689 | 0.0230 | 0.0561 | 0.0123 | 0.0121 | 0.0201 | 0.0472 | 0.0476 | 0.0244 | 0.3893 | 0.0497 |

|               |        |        |        |        |        |        |        |        |        |        |        |        |        |        |        |
|---------------|--------|--------|--------|--------|--------|--------|--------|--------|--------|--------|--------|--------|--------|--------|--------|
| IL1A_E113_R   | 0.9943 | 0.2958 | 0.9857 | 0.9956 | 0.9946 | 0.0000 | 0.9934 | 0.9947 | 0.9902 | 0.8592 | 0.9867 | 0.6890 | 0.9856 | 0.9873 | 0.9911 |
| IL1RN_E42_F   | 0.1114 | 0.0000 | 0.9802 | 0.0000 | 0.9919 | 0.9801 | 0.0000 | 0.9944 | 0.9808 | 0.9871 | 0.9890 | 0.7553 | 0.9825 | 0.0087 | 0.9887 |
| IL3_P556_F    | 0.0000 | 0.5330 | 0.9762 | 0.0000 | 0.0000 | 0.0000 | 0.0000 | 0.0000 | 0.9827 | 0.9886 | 0.9870 | 0.9883 | 0.9800 | 0.2976 | 0.9932 |
| IL6_E168_F    | 0.2128 | 0.4573 | 0.0088 | 0.2646 | 0.0161 | 0.0068 | 0.0100 | 0.0106 | 0.0000 | 0.0000 | 0.4323 | 0.0000 | 0.0731 | 0.9868 | 0.0070 |
| IL8_E118_R    | 0.0000 | 0.0000 | 0.3152 | 0.0000 | 0.9946 | 0.0000 | 0.0000 | 0.0032 | 0.0000 | 0.0000 | 0.0021 | 0.0000 | 0.0000 | 0.0086 | 0.0000 |
| IL8_P83_F     | 0.0000 | 0.0000 | 0.2475 | 0.0000 | 0.0000 | 0.0000 | 0.0000 | 0.0000 | 0.0000 | 0.0000 | 0.0000 | 0.0000 | 0.0000 | 0.0000 | 0.0000 |
| IMPACT_P186_F | 0.0068 | 0.0000 | 0.0000 | 0.0000 | 0.0000 | 0.0000 | 0.0000 | 0.0000 | 0.0000 | 0.0000 | 0.0000 | 0.0000 | 0.0000 | 0.0000 | 0.0000 |
| IMPACT_P234_R | 0.0000 | 0.0000 | 0.1215 | 0.0000 | 0.0053 | 0.0024 | 0.0059 | 0.0018 | 0.0000 | 0.0000 | 0.0059 | 0.0000 | 0.0000 | 0.0000 | 0.0000 |
| INSR_P1063_R  | 0.0119 | 0.0000 | 0.0000 | 0.0000 | 0.0000 | 0.0000 | 0.0000 | 0.0000 | 0.0000 | 0.0000 | 0.0000 | 0.0000 | 0.1997 | 0.0000 | 0.0000 |
| IPF1_P234_F   | 0.0000 | 0.0005 | 0.2158 | 0.0081 | 0.0000 | 0.0000 | 0.0045 | 0.0000 | 0.0000 | 0.7680 | 0.0089 | 0.0018 | 0.1645 | 0.0087 | 0.0051 |
| IRAK1_P455_R  | 0.0000 | 0.0000 | 0.2658 | 0.0000 | 0.0861 | 0.0784 | 0.0082 | 0.0578 | 0.0000 | 0.0000 | 0.0101 | 0.0416 | 0.4013 | 0.0000 | 0.0081 |
| IRAK3_E130_F  | 0.0088 | 0.0000 | 0.0077 | 0.0000 | 0.0000 | 0.0004 | 0.0058 | 0.0033 | 0.0000 | 0.0000 | 0.0127 | 0.0114 | 0.0033 | 0.0111 | 0.0063 |
| IRAK3_P13_F   | 0.0000 | 0.0000 | 0.0067 | 0.0000 | 0.0000 | 0.0114 | 0.1667 | 0.0000 | 0.0000 | 0.0000 | 0.0186 | 0.0058 | 0.0000 | 0.0066 | 0.0035 |
| IRF5_P123_F   | 0.0140 | 0.0349 | 0.0436 | 0.0070 | 0.0056 | 0.0070 | 0.0000 | 0.0772 | 0.2089 | 0.0232 | 0.0115 | 0.0094 | 0.0173 | 0.0000 | 0.9285 |
| IRF7_P277_R   | 0.0132 | 0.0692 | 0.0526 | 0.0258 | 0.0279 | 0.0181 | 0.2711 | 0.1964 | 0.0000 | 0.0000 | 0.0151 | 0.0146 | 0.0087 | 0.0304 | 0.0202 |
| ISL1_E87_R    | 0.0000 | 0.0000 | 0.0094 | 0.0000 | 0.0000 | 0.0049 | 0.0000 | 0.0000 | 0.0000 | 0.0000 | 0.0091 | 0.0000 | 0.0480 | 0.0088 | 0.0046 |
| ISL1_P379_F   | 0.0526 | 0.0000 | 0.0037 | 0.0114 | 0.0085 | 0.0039 | 0.0038 | 0.0000 | 0.0850 | 0.0000 | 0.0059 | 0.0074 | 0.1974 | 0.0120 | 0.0044 |
| ISL1_P554_F   | 0.0000 | 0.0000 | 0.0000 | 0.0000 | 0.0069 | 0.0000 | 0.0000 | 0.0002 | 0.0000 | 0.0000 | 0.0000 | 0.0000 | 0.0000 | 0.0000 | 0.0008 |
| ITGA2_E120_F  | 0.0127 | 0.0000 | 0.0085 | 0.0084 | 0.0070 | 0.0080 | 0.4295 | 0.3367 | 0.0000 | 0.0000 | 0.0119 | 0.2924 | 0.0008 | 0.0101 | 0.0048 |
| ITGA2_P26_R   | 0.0116 | 0.0000 | 0.0000 | 0.0000 | 0.0290 | 0.0035 | 0.0000 | 0.0000 | 0.0000 | 0.0000 | 0.0000 | 0.0000 | 0.0000 | 0.0012 | 0.0021 |
| ITGB4_E144_F  | 0.0000 | 0.0000 | 0.0042 | 0.0113 | 0.0000 | 0.0075 | 0.0134 | 0.0000 | 0.0000 | 0.0000 | 0.0102 | 0.0000 | 0.0269 | 0.0075 | 0.0054 |
| ITGB4_P517_F  | 0.0000 | 0.0000 | 0.0000 | 0.0026 | 0.0000 | 0.0000 | 0.0038 | 0.0000 | 0.0000 | 0.0000 | 0.0005 | 0.0001 | 0.3014 | 0.0029 | 0.0000 |
| ITPR3_E86_R   | 0.0000 | 0.0000 | 0.0000 | 0.0000 | 0.0000 | 0.0000 | 0.0000 | 0.0000 | 0.0000 | 0.0000 | 0.0000 | 0.0025 | 0.0000 | 0.0006 | 0.0057 |
| ITPR3_P1112_F | 0.0000 | 0.0000 | 0.0000 | 0.0000 | 0.0000 | 0.0014 | 0.0000 | 0.0000 | 0.0000 | 0.0000 | 0.0010 | 0.0021 | 0.0000 | 0.0000 | 0.0000 |
| JAG2_E54_F    | 0.0091 | 0.0000 | 0.0053 | 0.0000 | 0.0000 | 0.0000 | 0.0064 | 0.0000 | 0.5595 | 0.0000 | 0.0075 | 0.0130 | 0.0000 | 0.0030 | 0.0000 |
| JAG2_P264_F   | 0.4793 | 0.0000 | 0.0152 | 0.6053 | 0.0046 | 0.0061 | 0.0083 | 0.0087 | 0.0000 | 0.0000 | 0.0197 | 0.1739 | 0.0060 | 0.0095 | 0.0063 |
| JAK2_P772_R   | 0.4446 | 0.0000 | 0.0108 | 0.0233 | 0.2117 | 0.1101 | 0.0155 | 0.2149 | 0.0000 | 0.0000 | 0.0137 | 0.0087 | 0.0014 | 0.1766 | 0.0290 |
| JAK3_E64_F    | 0.0000 | 0.0000 | 0.0089 | 0.2407 | 0.0067 | 0.0020 | 0.0000 | 0.0000 | 0.0000 | 0.0000 | 0.0099 | 0.0061 | 0.0055 | 0.0053 | 0.0030 |
| JAK3_P156_R   | 0.0099 | 0.0000 | 0.0180 | 0.1164 | 0.1323 | 0.0061 | 0.0122 | 0.1188 | 0.0000 | 0.0000 | 0.0147 | 0.0081 | 0.1164 | 0.0633 | 0.0103 |
| JUNB_P1149_R  | 0.5531 | 0.4492 | 0.0531 | 0.3416 | 0.1311 | 0.5820 | 0.5649 | 0.4774 | 0.0687 | 0.1743 | 0.0839 | 0.4721 | 0.0564 | 0.1763 | 0.5172 |
| KCNK4_E3_F    | 0.0076 | 0.0000 | 0.1244 | 0.0054 | 0.0042 | 0.0003 | 0.0000 | 0.0000 | 0.0000 | 0.5565 | 0.0211 | 0.0000 | 0.1412 | 0.0000 | 0.0023 |
| KDR_E79_F     | 0.7582 | 0.5589 | 0.0414 | 0.9074 | 0.7142 | 0.0541 | 0.7483 | 0.0315 | 0.0000 | 0.0209 | 0.0150 | 0.0352 | 0.1035 | 0.0907 | 0.0387 |
| KDR_P445_R    | 0.0000 | 0.0000 | 0.0069 | 0.0000 | 0.0000 | 0.0188 | 0.0000 | 0.0000 | 0.0000 | 0.0000 | 0.2689 | 0.0037 | 0.0693 | 0.0053 | 0.0000 |

|                 |        |        |        |        |        |        |        |        |        |        |        |        |        |        |        |
|-----------------|--------|--------|--------|--------|--------|--------|--------|--------|--------|--------|--------|--------|--------|--------|--------|
| KIAA1804_P689_R | 0.0096 | 0.0000 | 0.0116 | 0.0171 | 0.0082 | 0.0707 | 0.0089 | 0.0040 | 0.0000 | 0.0000 | 0.0149 | 0.0060 | 0.0406 | 0.0081 | 0.0060 |
| KIT_P367_R      | 0.0000 | 0.0000 | 0.0058 | 0.0000 | 0.3018 | 0.0000 | 0.0060 | 0.0000 | 0.0000 | 0.0000 | 0.0078 | 0.0000 | 0.0000 | 0.0015 | 0.0041 |
| KIT_P405_F      | 0.0095 | 0.0000 | 0.0059 | 0.0000 | 0.0000 | 0.0060 | 0.4401 | 0.0065 | 0.2565 | 0.0000 | 0.0101 | 0.0055 | 0.0915 | 0.0089 | 0.0046 |
| KLF5_E190_R     | 0.0000 | 0.0000 | 0.1599 | 0.0000 | 0.0000 | 0.0022 | 0.0000 | 0.0000 | 0.0000 | 0.0000 | 0.0046 | 0.0052 | 0.0000 | 0.0751 | 0.0031 |
| KLK11_P103_R    | 0.3732 | 0.0000 | 0.9670 | 0.0000 | 0.0052 | 0.9938 | 0.9947 | 0.9921 | 0.7108 | 0.9837 | 0.8976 | 0.9869 | 0.9009 | 0.0000 | 0.9789 |
| KLK11_P1290_F   | 0.0000 | 0.0550 | 0.9787 | 0.0000 | 0.0000 | 0.0000 | 0.0000 | 0.0000 | 0.9823 | 0.9448 | 0.9851 | 0.0447 | 0.9522 | 0.2944 | 0.9832 |
| KRAS_E82_F      | 0.0000 | 0.0000 | 0.7624 | 0.0080 | 0.0070 | 0.0000 | 0.1834 | 0.0047 | 0.0000 | 0.8556 | 0.1783 | 0.0437 | 0.6245 | 0.0084 | 0.0031 |
| KRAS_P651_F     | 0.4929 | 0.2206 | 0.0824 | 0.5853 | 0.5374 | 0.4671 | 0.5573 | 0.4664 | 0.0820 | 0.1375 | 0.0744 | 0.4359 | 0.0691 | 0.4337 | 0.4749 |
| KRT13_P341_R    | 0.0000 | 0.0000 | 0.8836 | 0.0000 | 0.0000 | 0.9941 | 0.0000 | 0.0000 | 0.8720 | 0.9855 | 0.6723 | 0.0000 | 0.9815 | 0.4206 | 0.0000 |
| KRT5_P308_F     | 0.2740 | 0.6163 | 0.7516 | 0.1906 | 0.1091 | 0.5589 | 0.2044 | 0.2110 | 0.9513 | 0.1642 | 0.8721 | 0.8994 | 0.9388 | 0.1982 | 0.9281 |
| L1CAM_P148_R    | 0.0000 | 0.0000 | 0.0476 | 0.0084 | 0.0061 | 0.0058 | 0.0000 | 0.0719 | 0.0000 | 0.0000 | 0.0086 | 0.0100 | 0.0000 | 0.0000 | 0.0045 |
| L1CAM_P19_F     | 0.9942 | 0.0000 | 0.2684 | 0.0000 | 0.0080 | 0.0000 | 0.0000 | 0.0647 | 0.0000 | 0.7507 | 0.0139 | 0.0000 | 0.1934 | 0.0000 | 0.0035 |
| LAMC1_E466_R    | 0.1265 | 0.0000 | 0.0039 | 0.0748 | 0.0073 | 0.0487 | 0.0000 | 0.1486 | 0.0000 | 0.0000 | 0.0242 | 0.0045 | 0.0000 | 0.0179 | 0.0026 |
| LIF_E208_F      | 0.0175 | 0.0000 | 0.0134 | 0.0121 | 0.0210 | 0.0053 | 0.0000 | 0.0035 | 0.0000 | 0.0000 | 0.0153 | 0.0111 | 0.0023 | 0.0144 | 0.2181 |
| LIF_P383_R      | 0.0000 | 0.0000 | 0.0857 | 0.0000 | 0.3694 | 0.0000 | 0.0000 | 0.0039 | 0.8843 | 0.0000 | 0.1416 | 0.1811 | 0.3829 | 0.1105 | 0.0000 |
| LIG4_P194_F     | 0.2800 | 0.0000 | 0.0126 | 0.0248 | 0.2677 | 0.0074 | 0.0000 | 0.0190 | 0.0000 | 0.0000 | 0.0100 | 0.0097 | 0.0025 | 0.0000 | 0.1777 |
| LMO1_E265_R     | 0.0000 | 0.0000 | 0.0000 | 0.9847 | 0.0041 | 0.0000 | 0.0044 | 0.0000 | 0.0000 | 0.0000 | 0.0019 | 0.0000 | 0.1281 | 0.0016 | 0.0000 |
| LMO1_P169_F     | 0.0000 | 0.0000 | 0.0073 | 0.0000 | 0.0053 | 0.0013 | 0.0074 | 0.0041 | 0.0000 | 0.0000 | 0.0096 | 0.0000 | 0.0016 | 0.0000 | 0.0057 |
| LOX_P313_R      | 0.1021 | 0.1685 | 0.0163 | 0.0167 | 0.1278 | 0.0129 | 0.0209 | 0.0093 | 0.0000 | 0.0000 | 0.0407 | 0.8734 | 0.0099 | 0.0308 | 0.0804 |
| LOX_P71_F       | 0.0000 | 0.0000 | 0.0009 | 0.0068 | 0.0000 | 0.0038 | 0.0000 | 0.0321 | 0.0000 | 0.0000 | 0.0044 | 0.0031 | 0.0000 | 0.0081 | 0.0000 |
| LRP2_E20_F      | 0.5492 | 0.9519 | 0.0267 | 0.6014 | 0.0463 | 0.5035 | 0.5174 | 0.5517 | 0.1447 | 0.0461 | 0.0233 | 0.0301 | 0.0261 | 0.8627 | 0.4658 |
| LRRC32_P865_R   | 0.0000 | 0.0000 | 0.0046 | 0.0000 | 0.0000 | 0.0000 | 0.0041 | 0.0000 | 0.0000 | 0.0000 | 0.0198 | 0.0064 | 0.0000 | 0.0000 | 0.0042 |
| LTB4R_E64_R     | 0.0554 | 0.5275 | 0.1611 | 0.9047 | 0.2608 | 0.4585 | 0.6125 | 0.0164 | 0.0000 | 0.0000 | 0.0390 | 0.0697 | 0.2062 | 0.8248 | 0.0321 |
| LYN_E353_F      | 0.0000 | 0.0000 | 0.7264 | 0.0000 | 0.0000 | 0.0000 | 0.0043 | 0.0000 | 0.0000 | 0.0000 | 0.0000 | 0.0000 | 0.0000 | 0.0000 | 0.0028 |
| LYN_P241_F      | 0.3095 | 0.1022 | 0.0258 | 0.4185 | 0.0557 | 0.0708 | 0.0626 | 0.2563 | 0.0466 | 0.0361 | 0.2542 | 0.0519 | 0.0383 | 0.0437 | 0.0380 |
| MAF_P826_R      | 0.0060 | 0.0000 | 0.0000 | 0.0000 | 0.0033 | 0.0000 | 0.0000 | 0.0022 | 0.0000 | 0.0000 | 0.0000 | 0.0000 | 0.0000 | 0.0000 | 0.0000 |
| MAGEC3_P903_F   | 0.0000 | 0.0000 | 0.3335 | 0.0000 | 0.0000 | 0.0000 | 0.0105 | 0.0074 | 0.0000 | 0.7008 | 0.0000 | 0.0000 | 0.9128 | 0.9892 | 0.9904 |
| MAGEL2_E166_R   | 0.0000 | 0.0000 | 0.5368 | 0.0000 | 0.0149 | 0.0000 | 0.9934 | 0.0000 | 0.0000 | 0.0000 | 0.0107 | 0.0000 | 0.9291 | 0.0090 | 0.0000 |
| MALT1_P406_R    | 0.0888 | 0.0000 | 0.1812 | 0.0000 | 0.0000 | 0.0123 | 0.0000 | 0.0000 | 0.0000 | 0.0000 | 0.6508 | 0.0000 | 0.0000 | 0.0139 | 0.0032 |
| MAP2K6_E297_F   | 0.0000 | 0.0000 | 0.0000 | 0.0000 | 0.0028 | 0.0000 | 0.0000 | 0.0000 | 0.0000 | 0.0000 | 0.0022 | 0.0000 | 0.1057 | 0.0000 | 0.0000 |
| MAP2K6_P297_R   | 0.0157 | 0.0000 | 0.1027 | 0.0161 | 0.1261 | 0.0170 | 0.1161 | 0.1367 | 0.0019 | 0.2832 | 0.0424 | 0.0127 | 0.1140 | 0.0154 | 0.0157 |
| MAP3K1_P7_F     | 0.4375 | 0.0000 | 0.0333 | 0.8300 | 0.0601 | 0.0063 | 0.1209 | 0.1691 | 0.0232 | 0.1051 | 0.0227 | 0.4741 | 0.0192 | 0.7592 | 0.0128 |
| MAP3K9_E17_R    | 0.5152 | 0.0000 | 0.0245 | 0.0000 | 0.0392 | 0.0283 | 0.0000 | 0.4380 | 0.0000 | 0.0000 | 0.0144 | 0.0065 | 0.0071 | 0.0000 | 0.4433 |

|                    |        |        |        |        |        |        |        |        |        |        |        |        |        |        |        |
|--------------------|--------|--------|--------|--------|--------|--------|--------|--------|--------|--------|--------|--------|--------|--------|--------|
| MAPK12_E165_R      | 0.0000 | 0.0000 | 0.0080 | 0.0000 | 0.0078 | 0.0000 | 0.0064 | 0.0072 | 0.0000 | 0.0000 | 0.0170 | 0.6402 | 0.0029 | 0.0091 | 0.1562 |
| MAPK12_P416_F      | 0.0000 | 0.0057 | 0.0000 | 0.0000 | 0.0000 | 0.0000 | 0.0000 | 0.0000 | 0.0000 | 0.0000 | 0.0077 | 0.0000 | 0.0000 | 0.0000 | 0.0000 |
| MAPK14_P327_R      | 0.0121 | 0.8689 | 0.0048 | 0.1672 | 0.0000 | 0.3887 | 0.0000 | 0.0000 | 0.0000 | 0.0000 | 0.0060 | 0.8291 | 0.0179 | 0.9621 | 0.3801 |
| MAPK4_E273_R       | 0.1836 | 0.0000 | 0.9416 | 0.0000 | 0.0000 | 0.0000 | 0.0050 | 0.0027 | 0.9507 | 0.0000 | 0.8846 | 0.0000 | 0.8845 | 0.0018 | 0.6726 |
| MAPK9_P1175_F      | 0.0067 | 0.1352 | 0.9735 | 0.0060 | 0.0000 | 0.9946 | 0.0000 | 0.0000 | 0.7425 | 0.0000 | 0.9826 | 0.8064 | 0.9749 | 0.0000 | 0.0000 |
| MAS1_P469_R        | 0.1814 | 0.1653 | 0.9741 | 0.1962 | 0.3785 | 0.4413 | 0.2439 | 0.0214 | 0.9838 | 0.8757 | 0.9809 | 0.2126 | 0.9757 | 0.7941 | 0.9908 |
| MATK_P64_F         | 0.0918 | 0.0021 | 0.0070 | 0.0099 | 0.0072 | 0.0146 | 0.0084 | 0.0933 | 0.0000 | 0.0000 | 0.0094 | 0.0665 | 0.0442 | 0.0156 | 0.0064 |
| MC2R_P1025_F       | 0.0000 | 0.0000 | 0.0000 | 0.0000 | 0.0000 | 0.0000 | 0.0000 | 0.0000 | 0.6513 | 0.9695 | 0.0000 | 0.0000 | 0.4538 | 0.0000 | 0.0000 |
| MCAM_P169_R        | 0.0000 | 0.0000 | 0.0077 | 0.0090 | 0.0000 | 0.1698 | 0.0000 | 0.0043 | 0.0000 | 0.0000 | 0.0063 | 0.0027 | 0.0005 | 0.1201 | 0.0151 |
| MCAM_P265_R        | 0.0981 | 0.2433 | 0.4253 | 0.9945 | 0.1018 | 0.0079 | 0.0077 | 0.0898 | 0.0091 | 0.0168 | 0.0266 | 0.0150 | 0.1938 | 0.0111 | 0.0078 |
| MCC_P196_R         | 0.0000 | 0.0000 | 0.0000 | 0.0024 | 0.0015 | 0.0000 | 0.0033 | 0.0029 | 0.0000 | 0.0000 | 0.9687 | 0.0000 | 0.0000 | 0.0040 | 0.0000 |
| MCM2_P241_R        | 0.0148 | 0.1042 | 0.0066 | 0.3952 | 0.0117 | 0.0111 | 0.0143 | 0.0074 | 0.0000 | 0.0000 | 0.0078 | 0.2356 | 0.0896 | 0.0146 | 0.0076 |
| MDR1_seq_42_S300_R | 0.0138 | 0.0341 | 0.0031 | 0.0012 | 0.0368 | 0.0550 | 0.0132 | 0.0085 | 0.0000 | 0.0000 | 0.0088 | 0.0580 | 0.0000 | 0.0067 | 0.0149 |
| MDS1_E45_F         | 0.0110 | 0.0000 | 0.0157 | 0.0000 | 0.0000 | 0.0000 | 0.0000 | 0.0067 | 0.0000 | 0.0000 | 0.0156 | 0.0081 | 0.0086 | 0.0118 | 0.0000 |
| MECP2_E90_R        | 0.0000 | 0.0000 | 0.3045 | 0.0100 | 0.0000 | 0.9949 | 0.0070 | 0.0000 | 0.0000 | 0.0000 | 0.2563 | 0.2995 | 0.2196 | 0.0099 | 0.0049 |
| MEG3_E91_F         | 0.0000 | 0.0000 | 0.1467 | 0.0000 | 0.0000 | 0.0035 | 0.0000 | 0.0000 | 0.0000 | 0.5456 | 0.0045 | 0.0000 | 0.1905 | 0.0085 | 0.0000 |
| MEST_E150_F        | 0.0056 | 0.0000 | 0.0879 | 0.0000 | 0.0002 | 0.0000 | 0.0000 | 0.0011 | 0.0000 | 0.0000 | 0.0037 | 0.0017 | 0.0698 | 0.0041 | 0.0009 |
| MEST_P4_F          | 0.1169 | 0.0000 | 0.0026 | 0.0000 | 0.0000 | 0.0000 | 0.0000 | 0.0000 | 0.0000 | 0.0000 | 0.0033 | 0.0018 | 0.2345 | 0.9270 | 0.0000 |
| MEST_P62_R         | 0.0082 | 0.0000 | 0.0515 | 0.0000 | 0.0034 | 0.0000 | 0.0000 | 0.0000 | 0.0000 | 0.0000 | 0.0010 | 0.0000 | 0.0485 | 0.0032 | 0.0000 |
| MET_E333_F         | 0.0617 | 0.4040 | 0.0271 | 0.0184 | 0.0148 | 0.2324 | 0.2697 | 0.0092 | 0.0000 | 0.7868 | 0.0636 | 0.2186 | 0.7563 | 0.0336 | 0.0000 |
| MFAP4_P197_F       | 0.0121 | 0.0000 | 0.1083 | 0.0000 | 0.0072 | 0.0000 | 0.0000 | 0.0000 | 0.0000 | 0.0000 | 0.0063 | 0.5142 | 0.0000 | 0.0158 | 0.0005 |
| MGMT_P272_R        | 0.0000 | 0.0000 | 0.0024 | 0.0000 | 0.0050 | 0.0054 | 0.0055 | 0.0000 | 0.0000 | 0.0000 | 0.0056 | 0.0015 | 0.0050 | 0.0051 | 0.0047 |
| MGMT_P281_F        | 0.6336 | 0.8767 | 0.0149 | 0.6520 | 0.5877 | 0.4695 | 0.0629 | 0.5265 | 0.0000 | 0.0000 | 0.0174 | 0.0189 | 0.0095 | 0.0250 | 0.4010 |
| MKRN3_P108_F       | 0.1763 | 0.4610 | 0.8313 | 0.0000 | 0.0000 | 0.9873 | 0.0000 | 0.0000 | 0.9697 | 0.9665 | 0.9564 | 0.0000 | 0.9720 | 0.0000 | 0.0000 |
| MLF1_P97_F         | 0.0000 | 0.0163 | 0.0064 | 0.0085 | 0.0000 | 0.0054 | 0.0115 | 0.0000 | 0.0000 | 0.0000 | 0.0100 | 0.0057 | 0.0000 | 0.0367 | 0.0754 |
| MLH1_P381_F        | 0.0089 | 0.0000 | 0.0077 | 0.3457 | 0.0146 | 0.0130 | 0.4378 | 0.0000 | 0.0000 | 0.0000 | 0.0122 | 0.2732 | 0.0006 | 0.0000 | 0.0055 |
| MLH3_E72_F         | 0.0196 | 0.0000 | 0.0036 | 0.0930 | 0.0000 | 0.0080 | 0.0000 | 0.0000 | 0.0000 | 0.0000 | 0.0061 | 0.0000 | 0.0000 | 0.0000 | 0.0053 |
| MLH3_P25_F         | 0.2266 | 0.0000 | 0.1022 | 0.0069 | 0.0042 | 0.0000 | 0.0101 | 0.0047 | 0.0000 | 0.0000 | 0.0063 | 0.0063 | 0.0746 | 0.0079 | 0.0040 |
| MLLT3_E93_R        | 0.0000 | 0.0000 | 0.0033 | 0.0000 | 0.0000 | 0.0057 | 0.0000 | 0.0000 | 0.0000 | 0.0000 | 0.0079 | 0.0018 | 0.0000 | 0.0000 | 0.0000 |
| MLLT4_P1400_F      | 0.0236 | 0.8665 | 0.0159 | 0.1393 | 0.1911 | 0.0241 | 0.1859 | 0.2100 | 0.0030 | 0.0000 | 0.0158 | 0.0147 | 0.0167 | 0.0208 | 0.0209 |
| MLLT6_P957_F       | 0.0000 | 0.0000 | 0.0015 | 0.0106 | 0.0062 | 0.0000 | 0.0000 | 0.0000 | 0.0000 | 0.0000 | 0.0040 | 0.7613 | 0.0000 | 0.7884 | 0.0032 |
| MME_E29_F          | 0.0000 | 0.0000 | 0.0010 | 0.0000 | 0.0000 | 0.0082 | 0.0010 | 0.0000 | 0.0000 | 0.0000 | 0.0082 | 0.0052 | 0.0000 | 0.0057 | 0.0067 |
| MME_P388_F         | 0.0000 | 0.6641 | 0.0000 | 0.0000 | 0.0183 | 0.0000 | 0.0000 | 0.0000 | 0.0000 | 0.0000 | 0.2528 | 0.0000 | 0.0868 | 0.0000 | 0.0000 |

|              |        |        |        |        |        |        |        |        |        |        |        |        |        |        |        |
|--------------|--------|--------|--------|--------|--------|--------|--------|--------|--------|--------|--------|--------|--------|--------|--------|
| MMP19_E274_R | 0.4531 | 0.1976 | 0.9805 | 0.0101 | 0.9329 | 0.9960 | 0.9936 | 0.0000 | 0.9833 | 0.9916 | 0.9741 | 0.8758 | 0.9394 | 0.9936 | 0.0000 |
| MMP2_E21_R   | 0.0000 | 0.0000 | 0.0011 | 0.0000 | 0.0000 | 0.0000 | 0.0035 | 0.0000 | 0.0000 | 0.7220 | 0.0073 | 0.0052 | 0.0000 | 0.0033 | 0.9921 |
| MMP2_P197_F  | 0.0000 | 0.0665 | 0.0057 | 0.0000 | 0.0090 | 0.0000 | 0.0094 | 0.0057 | 0.0000 | 0.0000 | 0.0150 | 0.0000 | 0.0006 | 0.0145 | 0.0021 |
| MMP2_P303_R  | 0.4050 | 0.0000 | 0.0104 | 0.0065 | 0.1599 | 0.0070 | 0.0513 | 0.0036 | 0.0000 | 0.0000 | 0.3015 | 0.0058 | 0.0040 | 0.0067 | 0.0020 |
| MMP3_P16_R   | 0.9904 | 0.4500 | 0.9779 | 0.0000 | 0.0000 | 0.0000 | 0.0000 | 0.0011 | 0.5354 | 0.4558 | 0.9851 | 0.9851 | 0.9734 | 0.9909 | 0.0000 |
| MMP7_P613_F  | 0.2200 | 0.0793 | 0.8444 | 0.2680 | 0.0323 | 0.0847 | 0.2749 | 0.9613 | 0.7923 | 0.0417 | 0.4495 | 0.1096 | 0.8657 | 0.6920 | 0.0993 |
| MMP9_P189_F  | 0.0000 | 0.0000 | 0.0552 | 0.0000 | 0.0000 | 0.0032 | 0.1568 | 0.0000 | 0.0000 | 0.0000 | 0.4879 | 0.0075 | 0.3138 | 0.0161 | 0.0000 |
| MMP9_P237_R  | 0.2716 | 0.0000 | 0.0113 | 0.0103 | 0.0082 | 0.1877 | 0.0104 | 0.0034 | 0.0000 | 0.0000 | 0.0123 | 0.0085 | 0.0029 | 0.0133 | 0.1695 |
| MOS_E60_R    | 0.0113 | 0.0237 | 0.0039 | 0.0690 | 0.0128 | 0.0089 | 0.0074 | 0.0144 | 0.0000 | 0.0000 | 0.0088 | 0.0062 | 0.0000 | 0.0176 | 0.0306 |
| MPO_P883_R   | 0.0000 | 0.0000 | 0.0858 | 0.0335 | 0.0000 | 0.0000 | 0.0000 | 0.0000 | 0.0000 | 0.0000 | 0.0137 | 0.0022 | 0.0707 | 0.0059 | 0.0044 |
| MSH3_E3_F    | 0.0000 | 0.0000 | 0.9178 | 0.9912 | 0.9935 | 0.9872 | 0.0000 | 0.0000 | 0.9803 | 0.6986 | 0.9329 | 0.9294 | 0.9815 | 0.0295 | 0.9897 |
| MSH3_P13_R   | 0.9963 | 0.2950 | 0.7773 | 0.5648 | 0.0660 | 0.0113 | 0.0156 | 0.8337 | 0.8831 | 0.7784 | 0.7756 | 0.8305 | 0.5999 | 0.0237 | 0.0193 |
| MST1R_P392_F | 0.0095 | 0.0000 | 0.1099 | 0.0000 | 0.0000 | 0.0000 | 0.0067 | 0.0000 | 0.0000 | 0.0000 | 0.0005 | 0.0000 | 0.0000 | 0.0019 | 0.0000 |
| MT1A_E13_R   | 0.0134 | 0.3637 | 0.0073 | 0.0486 | 0.2250 | 0.0018 | 0.0000 | 0.0059 | 0.0000 | 0.0000 | 0.3244 | 0.0382 | 0.0425 | 0.0000 | 0.0088 |
| MT1A_P49_R   | 0.0000 | 0.0000 | 0.0000 | 0.0000 | 0.0000 | 0.0000 | 0.0000 | 0.0000 | 0.0000 | 0.0000 | 0.0000 | 0.0018 | 0.0000 | 0.0000 | 0.0000 |
| MTA1_P478_F  | 0.1374 | 0.0000 | 0.0141 | 0.0862 | 0.0090 | 0.0788 | 0.1189 | 0.1644 | 0.0000 | 0.0000 | 0.0272 | 0.0113 | 0.0060 | 0.1485 | 0.0945 |
| MUC1_E18_R   | 0.0000 | 0.0000 | 0.0000 | 0.0000 | 0.3200 | 0.0000 | 0.0000 | 0.0000 | 0.0000 | 0.0000 | 0.0043 | 0.0000 | 0.6206 | 0.0000 | 0.0132 |
| MUC1_P191_F  | 0.0000 | 0.0000 | 0.1274 | 0.0000 | 0.0000 | 0.0000 | 0.0000 | 0.0000 | 0.9773 | 0.0000 | 0.0000 | 0.0073 | 0.1450 | 0.0000 | 0.0000 |
| MXI1_P75_R   | 0.0095 | 0.0055 | 0.0216 | 0.0168 | 0.0064 | 0.0070 | 0.0057 | 0.0055 | 0.0000 | 0.0000 | 0.0064 | 0.0053 | 0.1015 | 0.0137 | 0.0064 |
| MYBL2_P211_F | 0.3245 | 0.0000 | 0.0108 | 0.0000 | 0.0000 | 0.0013 | 0.3114 | 0.0329 | 0.0000 | 0.0000 | 0.0100 | 0.0000 | 0.0020 | 0.0020 | 0.0078 |
| MYCL1_P502_R | 0.0144 | 0.0000 | 0.0029 | 0.0000 | 0.0000 | 0.0000 | 0.0000 | 0.0000 | 0.0000 | 0.0000 | 0.0049 | 0.0040 | 0.0000 | 0.0144 | 0.0076 |
| MYCN_E77_R   | 0.0000 | 0.0000 | 0.0444 | 0.0000 | 0.0000 | 0.0165 | 0.0582 | 0.0000 | 0.0000 | 0.0000 | 0.0179 | 0.0074 | 0.0100 | 0.0198 | 0.0068 |
| MYCN_P464_R  | 0.0000 | 0.0000 | 0.0048 | 0.0000 | 0.0099 | 0.0012 | 0.0000 | 0.0068 | 0.0000 | 0.0000 | 0.0167 | 0.0033 | 0.0000 | 0.0071 | 0.0060 |
| MYH11_P22_F  | 0.2154 | 0.1162 | 0.0080 | 0.0195 | 0.0000 | 0.0045 | 0.0077 | 0.0000 | 0.0000 | 0.0000 | 0.0121 | 0.0063 | 0.1054 | 0.2890 | 0.0037 |
| MYH11_P236_R | 0.0000 | 0.0000 | 0.0000 | 0.0000 | 0.0000 | 0.0000 | 0.0000 | 0.0000 | 0.0000 | 0.0000 | 0.0000 | 0.0000 | 0.0000 | 0.0000 | 0.0000 |
| MYLK_P469_R  | 0.3479 | 0.6332 | 0.2788 | 0.5497 | 0.0112 | 0.1204 | 0.3714 | 0.2557 | 0.1838 | 0.0000 | 0.0106 | 0.0154 | 0.1004 | 0.0282 | 0.0117 |
| MYOD1_E156_F | 0.0056 | 0.4422 | 0.0022 | 0.0144 | 0.0037 | 0.0041 | 0.0726 | 0.0000 | 0.0000 | 0.3587 | 0.0050 | 0.0043 | 0.0174 | 0.2976 | 0.0000 |
| MYOD1_P50_F  | 0.0000 | 0.0000 | 0.1907 | 0.0000 | 0.0000 | 0.0053 | 0.0000 | 0.0117 | 0.6825 | 0.0000 | 0.0026 | 0.0000 | 0.0000 | 0.0000 | 0.0000 |
| NBL1_E205_R  | 0.8840 | 0.9858 | 0.9808 | 0.9500 | 0.9196 | 0.1032 | 0.9265 | 0.9922 | 0.8594 | 0.9185 | 0.9870 | 0.9282 | 0.9430 | 0.7779 | 0.8665 |
| NBL1_P24_F   | 0.1710 | 0.0000 | 0.8587 | 0.0000 | 0.1534 | 0.7925 | 0.0000 | 0.9880 | 0.9669 | 0.2655 | 0.1042 | 0.0000 | 0.9611 | 0.0000 | 0.9863 |
| NCL_P840_R   | 0.0107 | 0.0000 | 0.0087 | 0.0070 | 0.0000 | 0.0069 | 0.0000 | 0.0000 | 0.0000 | 0.0000 | 0.0137 | 0.0238 | 0.0038 | 0.0000 | 0.0042 |
| NDN_P1110_F  | 0.1104 | 0.6230 | 0.9738 | 0.9942 | 0.0000 | 0.0000 | 0.0000 | 0.6878 | 0.9827 | 0.9797 | 0.8116 | 0.0000 | 0.9696 | 0.9048 | 0.9888 |
| NEFL_E23_R   | 0.7280 | 0.9995 | 0.1338 | 0.9981 | 0.9845 | 0.9466 | 0.9435 | 0.9949 | 0.7069 | 0.8216 | 0.7792 | 0.9429 | 0.9278 | 0.9981 | 0.5703 |

|                |        |        |        |        |        |        |        |        |        |        |        |        |        |        |        |
|----------------|--------|--------|--------|--------|--------|--------|--------|--------|--------|--------|--------|--------|--------|--------|--------|
| NEFL_P209_R    | 0.0085 | 0.0000 | 0.0000 | 0.0040 | 0.0020 | 0.0000 | 0.0000 | 0.0000 | 0.0000 | 0.0000 | 0.0000 | 0.0046 | 0.1171 | 0.0000 | 0.0002 |
| NEO1_P1067_F   | 0.0000 | 0.0000 | 0.2494 | 0.0074 | 0.4649 | 0.0000 | 0.0000 | 0.0000 | 0.0000 | 0.0000 | 0.0000 | 0.0000 | 0.0000 | 0.0050 | 0.0000 |
| NES_P239_R     | 0.0093 | 0.0000 | 0.2184 | 0.0108 | 0.0070 | 0.3631 | 0.0239 | 0.0065 | 0.0000 | 0.0000 | 0.0088 | 0.0138 | 0.1896 | 0.0148 | 0.0168 |
| NEU1_P745_F    | 0.0000 | 0.0000 | 0.0033 | 0.0000 | 0.0000 | 0.0055 | 0.0000 | 0.0000 | 0.0000 | 0.0000 | 0.0059 | 0.0038 | 0.1505 | 0.0135 | 0.0034 |
| NFKB1_P336_R   | 0.1191 | 0.4113 | 0.0119 | 0.0209 | 0.0000 | 0.0000 | 0.0000 | 0.2737 | 0.7273 | 0.0000 | 0.0151 | 0.0000 | 0.0042 | 0.1317 | 0.2732 |
| NFKB2_P709_R   | 0.1913 | 0.1736 | 0.0276 | 0.0096 | 0.2728 | 0.0081 | 0.2232 | 0.0460 | 0.0012 | 0.0000 | 0.5383 | 0.0875 | 0.0138 | 0.4464 | 0.0181 |
| NGFB_E353_F    | 0.0000 | 0.0000 | 0.1253 | 0.0000 | 0.0050 | 0.0000 | 0.0000 | 0.0020 | 0.0000 | 0.0000 | 0.0028 | 0.0037 | 0.0000 | 0.0112 | 0.0000 |
| NGFB_P13_F     | 0.3304 | 0.0000 | 0.1887 | 0.0140 | 0.0171 | 0.3154 | 0.9114 | 0.3346 | 0.1230 | 0.3479 | 0.1189 | 0.0164 | 0.1626 | 0.9920 | 0.4456 |
| NGFR_E328_F    | 0.0000 | 0.0000 | 0.1497 | 0.0000 | 0.0000 | 0.0650 | 0.0000 | 0.0040 | 0.0000 | 0.0000 | 0.0066 | 0.0060 | 0.0000 | 0.0026 | 0.0035 |
| NGFR_P355_F    | 0.2881 | 0.1314 | 0.0538 | 0.1237 | 0.2206 | 0.3429 | 0.4086 | 0.2957 | 0.0565 | 0.1098 | 0.1469 | 0.0876 | 0.2244 | 0.1711 | 0.0620 |
| NKX3-1_P146_F  | 0.0291 | 0.0000 | 0.1043 | 0.0000 | 0.0000 | 0.0000 | 0.0000 | 0.1030 | 0.0000 | 0.0000 | 0.0101 | 0.0000 | 0.0000 | 0.0000 | 0.0040 |
| NKX3-1_P871_R  | 0.0000 | 0.6091 | 0.9803 | 0.0000 | 0.9829 | 0.9931 | 0.9935 | 0.0000 | 0.9865 | 0.9009 | 0.9855 | 0.9881 | 0.9826 | 0.9909 | 0.9901 |
| NOTCH1_E452_R  | 0.0000 | 0.0000 | 0.0000 | 0.0000 | 0.0000 | 0.0000 | 0.0000 | 0.0000 | 0.0000 | 0.0000 | 0.0000 | 0.0000 | 0.0000 | 0.0000 | 0.0000 |
| NOTCH1_P1198_F | 0.0000 | 0.0000 | 0.1524 | 0.0000 | 0.0000 | 0.0000 | 0.0052 | 0.0000 | 0.0000 | 0.0000 | 0.0066 | 0.0000 | 0.0713 | 0.0000 | 0.0000 |
| NOTCH2_P312_R  | 0.0127 | 0.1243 | 0.0017 | 0.3119 | 0.0091 | 0.0062 | 0.0048 | 0.0038 | 0.0000 | 0.0000 | 0.0054 | 0.0050 | 0.0000 | 0.0154 | 0.0042 |
| NOTCH3_E403_F  | 0.0000 | 0.0000 | 0.0000 | 0.0000 | 0.0046 | 0.0009 | 0.0000 | 0.0006 | 0.9756 | 0.0000 | 0.0009 | 0.0000 | 0.0000 | 0.0000 | 0.0000 |
| NPR2_P618_F    | 0.0000 | 0.0000 | 0.2926 | 0.0000 | 0.0000 | 0.9851 | 0.0074 | 0.0000 | 0.7013 | 0.0000 | 0.3875 | 0.4823 | 0.1381 | 0.0000 | 0.0000 |
| NPY_P295_F     | 0.0538 | 0.2499 | 0.0182 | 0.0431 | 0.0398 | 0.0397 | 0.5783 | 0.4710 | 0.0000 | 0.0000 | 0.0287 | 0.0588 | 0.0218 | 0.0554 | 0.5088 |
| NPY_P91_F      | 0.0113 | 0.0000 | 0.0162 | 0.0367 | 0.0108 | 0.0161 | 0.0878 | 0.0104 | 0.0000 | 0.0000 | 0.0176 | 0.0188 | 0.0132 | 0.0533 | 0.0123 |
| NQO1_E74_R     | 0.0000 | 0.0000 | 0.0062 | 0.0000 | 0.0000 | 0.0000 | 0.0066 | 0.0000 | 0.0000 | 0.0000 | 0.4389 | 0.0000 | 0.0517 | 0.0117 | 0.0056 |
| NQO1_P345_R    | 0.0083 | 0.0000 | 0.0012 | 0.0000 | 0.0017 | 0.0000 | 0.0000 | 0.0000 | 0.0000 | 0.0000 | 0.0046 | 0.0000 | 0.0000 | 0.4037 | 0.0018 |
| NR2F6_E375_R   | 0.0567 | 0.0000 | 0.0450 | 0.0153 | 0.0106 | 0.0102 | 0.0000 | 0.0000 | 0.0000 | 0.0000 | 0.0152 | 0.1730 | 0.0039 | 0.0100 | 0.0221 |
| NRAS_P103_R    | 0.0126 | 0.2201 | 0.0000 | 0.0094 | 0.0000 | 0.0003 | 0.0085 | 0.0000 | 0.0000 | 0.0000 | 0.0000 | 0.0000 | 0.0000 | 0.0000 | 0.0022 |
| NRAS_P12_R     | 0.0041 | 0.0000 | 0.0000 | 0.0000 | 0.0000 | 0.0000 | 0.0000 | 0.0000 | 0.0000 | 0.0000 | 0.0000 | 0.0000 | 0.0000 | 0.0000 | 0.0000 |
| NRG1_E74_F     | 0.0000 | 0.0000 | 0.1463 | 0.0094 | 0.0000 | 0.0013 | 0.0000 | 0.0000 | 0.7536 | 0.0000 | 0.0000 | 0.0000 | 0.1181 | 0.0000 | 0.0000 |
| NRG1_P558_R    | 0.0095 | 0.0300 | 0.1359 | 0.9964 | 0.0058 | 0.0724 | 0.0070 | 0.0346 | 0.0000 | 0.0000 | 0.0070 | 0.0054 | 0.0000 | 0.0100 | 0.0759 |
| NTRK2_P10_F    | 0.0000 | 0.0000 | 0.0072 | 0.0000 | 0.0000 | 0.0902 | 0.1327 | 0.0932 | 0.0000 | 0.0000 | 0.0054 | 0.0000 | 0.0000 | 0.0000 | 0.0024 |
| NTRK2_P395_R   | 0.0040 | 0.0000 | 0.0000 | 0.0000 | 0.0000 | 0.0002 | 0.0021 | 0.0010 | 0.0000 | 0.0000 | 0.0009 | 0.0000 | 0.0000 | 0.0000 | 0.0000 |
| NTRK3_E131_F   | 0.0000 | 0.0000 | 0.1889 | 0.0000 | 0.0000 | 0.0000 | 0.0120 | 0.0043 | 0.0000 | 0.0000 | 0.0031 | 0.0055 | 0.0000 | 0.0000 | 0.0000 |
| NTRK3_P636_R   | 0.0000 | 0.0000 | 0.0000 | 0.0047 | 0.0000 | 0.0011 | 0.0000 | 0.0000 | 0.0000 | 0.0000 | 0.0000 | 0.0003 | 0.0000 | 0.0000 | 0.0000 |
| NTRK3_P752_F   | 0.0000 | 0.0000 | 0.0000 | 0.0000 | 0.0000 | 0.0020 | 0.0064 | 0.0000 | 0.0000 | 0.0000 | 0.0001 | 0.0025 | 0.1712 | 0.0064 | 0.0000 |
| NTSR1_E109_F   | 0.0106 | 0.1272 | 0.0059 | 0.0098 | 0.0000 | 0.0078 | 0.0121 | 0.0000 | 0.0000 | 0.0000 | 0.0101 | 0.0089 | 0.1001 | 0.0090 | 0.0056 |
| NTSR1_P318_F   | 0.1181 | 0.0000 | 0.0131 | 0.0000 | 0.0075 | 0.0101 | 0.0967 | 0.0000 | 0.0000 | 0.0000 | 0.0390 | 0.8661 | 0.0130 | 0.6903 | 0.0075 |

|                    |        |        |        |        |        |        |        |        |        |        |        |        |        |        |        |
|--------------------|--------|--------|--------|--------|--------|--------|--------|--------|--------|--------|--------|--------|--------|--------|--------|
| OAT_P465_F         | 0.2630 | 0.1501 | 0.1596 | 0.5420 | 0.2423 | 0.0176 | 0.1097 | 0.3039 | 0.2001 | 0.0889 | 0.2627 | 0.0137 | 0.1065 | 0.0177 | 0.0099 |
| ODC1_P424_F        | 0.0073 | 0.0000 | 0.0000 | 0.0080 | 0.0000 | 0.0018 | 0.0000 | 0.0000 | 0.0000 | 0.0000 | 0.0016 | 0.0000 | 0.0000 | 0.0059 | 0.0000 |
| ONECUT2_E96_F      | 0.0084 | 0.0000 | 0.0242 | 0.6858 | 0.3544 | 0.0524 | 0.0000 | 0.0000 | 0.0000 | 0.0000 | 0.0547 | 0.0071 | 0.0100 | 0.0142 | 0.0408 |
| ONECUT2_P315_R     | 0.0000 | 0.0000 | 0.0000 | 0.0000 | 0.0106 | 0.0000 | 0.0000 | 0.0000 | 0.0000 | 0.0000 | 0.0000 | 0.0039 | 0.0000 | 0.0002 | 0.0000 |
| OPCML_E219_R       | 0.0108 | 0.0000 | 0.0106 | 0.0083 | 0.0000 | 0.0000 | 0.0077 | 0.0031 | 0.0000 | 0.0000 | 0.0072 | 0.0074 | 0.0000 | 0.0162 | 0.0057 |
| OPCML_P71_F        | 0.0088 | 0.0000 | 0.0039 | 0.0078 | 0.0005 | 0.0000 | 0.0055 | 0.0000 | 0.4518 | 0.0000 | 0.0102 | 0.0000 | 0.0000 | 0.0000 | 0.0032 |
| OSM_P188_F         | 0.1080 | 0.0290 | 0.0127 | 0.0633 | 0.0228 | 0.0559 | 0.0517 | 0.0880 | 0.0000 | 0.5764 | 0.3491 | 0.0082 | 0.0060 | 0.0075 | 0.0092 |
| p16_seq_47_S188_R  | 0.0276 | 0.0000 | 0.0049 | 0.0891 | 0.0366 | 0.0710 | 0.1178 | 0.0421 | 0.0000 | 0.0000 | 0.0075 | 0.0065 | 0.0000 | 0.0132 | 0.0539 |
| P2RX7_E323_R       | 0.0070 | 0.0000 | 0.0033 | 0.0000 | 0.0030 | 0.1358 | 0.3315 | 0.0000 | 0.0000 | 0.0000 | 0.0050 | 0.0058 | 0.0000 | 0.0000 | 0.0088 |
| P2RX7_P119_R       | 0.2254 | 0.0000 | 0.2674 | 0.1091 | 0.1626 | 0.1835 | 0.0130 | 0.1801 | 0.0502 | 0.1629 | 0.0288 | 0.0153 | 0.3300 | 0.1142 | 0.2087 |
| P2RX7_P597_F       | 0.2812 | 0.9257 | 0.9824 | 0.2005 | 0.3799 | 0.2003 | 0.2633 | 0.0124 | 0.9892 | 0.9923 | 0.9400 | 0.8335 | 0.9821 | 0.5177 | 0.9920 |
| PALM2-AKAP2_P183_R | 0.5115 | 0.2808 | 0.0205 | 0.6747 | 0.0481 | 0.0333 | 0.5972 | 0.5103 | 0.0190 | 0.0396 | 0.0241 | 0.0202 | 0.0928 | 0.0795 | 0.0287 |
| PALM2-AKAP2_P420_R | 0.0000 | 0.0000 | 0.0053 | 0.9836 | 0.0000 | 0.0029 | 0.0131 | 0.0066 | 0.0000 | 0.0000 | 0.0010 | 0.0157 | 0.0471 | 0.0155 | 0.0007 |
| PARP1_P610_R       | 0.0000 | 0.0000 | 0.8643 | 0.0000 | 0.0132 | 0.9943 | 0.0000 | 0.9930 | 0.7622 | 0.9565 | 0.9855 | 0.5582 | 0.8931 | 0.0000 | 0.9908 |
| PAX6_P1121_F       | 0.0135 | 0.0000 | 0.0094 | 0.0172 | 0.0000 | 0.0104 | 0.0226 | 0.0058 | 0.0000 | 0.0000 | 0.0098 | 0.0101 | 0.0000 | 0.0000 | 0.0000 |
| PAX6_P50_R         | 0.0000 | 0.0000 | 0.0000 | 0.0075 | 0.0000 | 0.0000 | 0.0000 | 0.0000 | 0.0000 | 0.0000 | 0.0042 | 0.0000 | 0.0000 | 0.0000 | 0.0000 |
| PCDH1_E22_F        | 0.0000 | 0.0000 | 0.0130 | 0.0084 | 0.0000 | 0.0116 | 0.0000 | 0.0576 | 0.0000 | 0.0000 | 0.0143 | 0.0066 | 0.0047 | 0.0104 | 0.2505 |
| PCGF4_P760_R       | 0.0981 | 0.0000 | 0.0100 | 0.0155 | 0.0799 | 0.0075 | 0.0101 | 0.0810 | 0.0000 | 0.0000 | 0.0144 | 0.0033 | 0.0907 | 0.0731 | 0.0086 |
| PCGF4_P92_R        | 0.0484 | 0.0097 | 0.0101 | 0.0098 | 0.0214 | 0.0074 | 0.0094 | 0.0331 | 0.0000 | 0.0000 | 0.0219 | 0.0442 | 0.0000 | 0.0107 | 0.0112 |
| PCTK1_E77_R        | 0.9976 | 0.9939 | 0.6937 | 0.9986 | 0.9587 | 0.9346 | 0.9982 | 0.9969 | 0.8526 | 0.9903 | 0.8645 | 0.9313 | 0.7954 | 0.9984 | 0.9967 |
| PDE1B_E141_F       | 0.0147 | 0.1847 | 0.0109 | 0.0159 | 0.0301 | 0.0236 | 0.4547 | 0.0204 | 0.0000 | 0.0000 | 0.0189 | 0.7209 | 0.0074 | 0.0187 | 0.0135 |
| PDE1B_P263_R       | 0.0000 | 0.0000 | 0.0686 | 0.0000 | 0.0079 | 0.0041 | 0.0116 | 0.0051 | 0.0953 | 0.0000 | 0.0110 | 0.0000 | 0.0039 | 0.0134 | 0.0000 |
| PDGFA_P841_R       | 0.0000 | 0.0000 | 0.0001 | 0.0000 | 0.0038 | 0.0007 | 0.0000 | 0.0000 | 0.0000 | 0.0000 | 0.0030 | 0.0000 | 0.0000 | 0.0000 | 0.0000 |
| PDGFRB_E195_R      | 0.0133 | 0.0000 | 0.2095 | 0.0000 | 0.0081 | 0.0065 | 0.0086 | 0.0000 | 0.0000 | 0.0000 | 0.0134 | 0.0170 | 0.0702 | 0.0169 | 0.0000 |
| PDGFRB_P343_F      | 0.0000 | 0.0000 | 0.0000 | 0.0064 | 0.0000 | 0.0017 | 0.0078 | 0.0000 | 0.0000 | 0.0000 | 0.0038 | 0.6834 | 0.0000 | 0.0077 | 0.0000 |
| PEG10_P978_R       | 0.0000 | 0.0000 | 0.0415 | 0.0000 | 0.9113 | 0.8087 | 0.0091 | 0.0000 | 0.0000 | 0.0000 | 0.0705 | 0.0041 | 0.0497 | 0.0000 | 0.0529 |
| PENK_E26_F         | 0.0600 | 0.1190 | 0.0838 | 0.0417 | 0.0420 | 0.0586 | 0.0370 | 0.0203 | 0.0183 | 0.0511 | 0.3880 | 0.0211 | 0.1237 | 0.1503 | 0.0295 |
| PENK_P447_R        | 0.0096 | 0.7843 | 0.0044 | 0.1694 | 0.4916 | 0.0000 | 0.0945 | 0.0460 | 0.0000 | 0.0000 | 0.0089 | 0.0090 | 0.0001 | 0.0247 | 0.1693 |
| PGF_E33_F          | 0.0125 | 0.0000 | 0.0132 | 0.0075 | 0.0000 | 0.0170 | 0.0077 | 0.0369 | 0.0000 | 0.0000 | 0.0164 | 0.0186 | 0.0037 | 0.0134 | 0.0825 |
| PHLDA2_P622_F      | 0.0000 | 0.0000 | 0.1640 | 0.0092 | 0.0085 | 0.6581 | 0.0000 | 0.0000 | 0.7012 | 0.0000 | 0.0051 | 0.0037 | 0.1617 | 0.0000 | 0.0000 |
| PI3_P1394_R        | 0.3699 | 0.7150 | 0.9690 | 0.0246 | 0.3246 | 0.2706 | 0.9936 | 0.9894 | 0.3748 | 0.0000 | 0.3136 | 0.4475 | 0.6206 | 0.6024 | 0.3442 |
| PITX2_E24_R        | 0.0121 | 0.0000 | 0.0126 | 0.3446 | 0.0595 | 0.0071 | 0.1456 | 0.0084 | 0.0000 | 0.0000 | 0.0176 | 0.0079 | 0.0041 | 0.0107 | 0.3826 |
| PITX2_P183_R       | 0.0000 | 0.0000 | 0.0000 | 0.0000 | 0.0000 | 0.0000 | 0.0000 | 0.0012 | 0.0000 | 0.0000 | 0.0000 | 0.0021 | 0.2858 | 0.0000 | 0.0000 |



|                |        |        |        |        |        |        |        |        |        |        |        |        |        |        |        |
|----------------|--------|--------|--------|--------|--------|--------|--------|--------|--------|--------|--------|--------|--------|--------|--------|
| PKD2_P287_R    | 0.0093 | 0.0000 | 0.0916 | 0.0118 | 0.0092 | 0.1127 | 0.1722 | 0.0078 | 0.0000 | 0.0000 | 0.0122 | 0.0091 | 0.0000 | 0.0178 | 0.2954 |
| PKD2_P336_R    | 0.0082 | 0.0000 | 0.0458 | 0.0065 | 0.0095 | 0.0058 | 0.2916 | 0.0053 | 0.0021 | 0.0000 | 0.0126 | 0.0092 | 0.1111 | 0.3795 | 0.0066 |
| PLAU_P11_F     | 0.3430 | 0.0000 | 0.1152 | 0.2875 | 0.0155 | 0.0241 | 0.3018 | 0.3425 | 0.0007 | 0.0000 | 0.0238 | 0.0185 | 0.0156 | 0.0174 | 0.0183 |
| PLAU_P176_R    | 0.0000 | 0.0000 | 0.0005 | 0.0000 | 0.0000 | 0.0009 | 0.0000 | 0.0000 | 0.0000 | 0.0000 | 0.0039 | 0.0126 | 0.2778 | 0.0048 | 0.0000 |
| PLAUR_E123_F   | 0.0000 | 0.0000 | 0.0022 | 0.0000 | 0.0054 | 0.0000 | 0.0000 | 0.0015 | 0.1558 | 0.0000 | 0.0034 | 0.0073 | 0.0000 | 0.0000 | 0.0051 |
| PLAUR_P82_F    | 0.0000 | 0.1023 | 0.0000 | 0.1688 | 0.0098 | 0.0059 | 0.0060 | 0.0003 | 0.0000 | 0.0000 | 0.0024 | 0.0000 | 0.0000 | 0.0134 | 0.0051 |
| PLG_E406_F     | 0.0178 | 0.2413 | 0.9358 | 0.0000 | 0.0036 | 0.0184 | 0.9417 | 0.5905 | 0.9906 | 0.9172 | 0.7473 | 0.9872 | 0.9898 | 0.9933 | 0.0000 |
| PLSCR3_P751_R  | 0.0284 | 0.0000 | 0.3541 | 0.1290 | 0.0133 | 0.1737 | 0.0145 | 0.0168 | 0.1915 | 0.0000 | 0.0111 | 0.0073 | 0.1033 | 0.0178 | 0.0106 |
| PLXDC1_P236_F  | 0.2621 | 0.0000 | 0.0123 | 0.0133 | 0.0118 | 0.1511 | 0.0145 | 0.0052 | 0.0000 | 0.0000 | 0.0128 | 0.1272 | 0.0056 | 0.0000 | 0.0899 |
| PLXDC2_E337_F  | 0.0177 | 0.0000 | 0.0039 | 0.0152 | 0.0000 | 0.0000 | 0.0000 | 0.0000 | 0.0000 | 0.0000 | 0.0078 | 0.0000 | 0.0000 | 0.0000 | 0.0055 |
| PLXDC2_P914_R  | 0.0270 | 0.2256 | 0.0276 | 0.4361 | 0.3458 | 0.0309 | 0.4746 | 0.0192 | 0.4017 | 0.0273 | 0.0261 | 0.0222 | 0.0265 | 0.4143 | 0.0220 |
| PMP22_P975_F   | 0.3214 | 0.0000 | 0.9775 | 0.0000 | 0.0022 | 0.0000 | 0.9940 | 0.9932 | 0.9866 | 0.7882 | 0.8365 | 0.9902 | 0.9745 | 0.0000 | 0.0000 |
| PODXL_P1341_R  | 0.0610 | 0.0110 | 0.0656 | 0.0147 | 0.0444 | 0.0061 | 0.0169 | 0.2678 | 0.0000 | 0.0000 | 0.0081 | 0.0086 | 0.0470 | 0.0000 | 0.0478 |
| POMC_E254_F    | 0.6030 | 0.0000 | 0.0353 | 0.7228 | 0.0264 | 0.0156 | 0.0000 | 0.0047 | 0.0000 | 0.0000 | 0.0160 | 0.0064 | 0.0621 | 0.0000 | 0.0076 |
| POMC_P400_R    | 0.0000 | 0.6129 | 0.0039 | 0.0000 | 0.0000 | 0.0000 | 0.0000 | 0.0000 | 0.0000 | 0.0000 | 0.0003 | 0.0110 | 0.3783 | 0.0123 | 0.0303 |
| POMC_P53_F     | 0.0117 | 0.0000 | 0.0080 | 0.0086 | 0.0111 | 0.1237 | 0.0089 | 0.0073 | 0.0000 | 0.0000 | 0.0119 | 0.0460 | 0.0005 | 0.0182 | 0.0041 |
| PPARD_P846_F   | 0.0000 | 0.0000 | 0.2503 | 0.0000 | 0.0000 | 0.0000 | 0.0000 | 0.0000 | 0.0000 | 0.9481 | 0.0087 | 0.0000 | 0.0000 | 0.0000 | 0.0047 |
| PPARG_E178_R   | 0.0000 | 0.0000 | 0.1483 | 0.0000 | 0.0000 | 0.0000 | 0.0000 | 0.0062 | 0.0000 | 0.0000 | 0.0091 | 0.0070 | 0.1889 | 0.0000 | 0.0000 |
| PPP2R1B_P268_R | 0.0000 | 0.0000 | 0.0033 | 0.0000 | 0.2745 | 0.0028 | 0.0754 | 0.0030 | 0.0000 | 0.0000 | 0.0047 | 0.0000 | 0.0000 | 0.0000 | 0.0030 |
| PRDM2_P1340_R  | 0.9905 | 0.0000 | 0.9640 | 0.0000 | 0.0000 | 0.0000 | 0.0052 | 0.0000 | 0.9778 | 0.9784 | 0.9706 | 0.0000 | 0.9674 | 0.9850 | 0.0000 |
| PRKCDBP_E206_F | 0.0000 | 0.0000 | 0.0809 | 0.0000 | 0.0000 | 0.0022 | 0.0049 | 0.0027 | 0.0000 | 0.0000 | 0.3522 | 0.0015 | 0.0000 | 0.0000 | 0.0000 |
| PROK2_E0_F     | 0.0000 | 0.0000 | 0.0030 | 0.0000 | 0.0000 | 0.0000 | 0.0000 | 0.0000 | 0.0017 | 0.0000 | 0.0135 | 0.0053 | 0.0000 | 0.0238 | 0.0019 |
| PROK2_P390_F   | 0.0000 | 0.1653 | 0.0000 | 0.0169 | 0.0000 | 0.0000 | 0.0096 | 0.0000 | 0.0000 | 0.0000 | 0.0000 | 0.0011 | 0.0000 | 0.0155 | 0.0011 |
| PRSS8_E134_R   | 0.0000 | 0.6273 | 0.9826 | 0.9962 | 0.0498 | 0.1975 | 0.1339 | 0.9936 | 0.9860 | 0.9872 | 0.9886 | 0.9920 | 0.9879 | 0.9926 | 0.9917 |
| PSCA_E359_F    | 0.0000 | 0.0000 | 0.1104 | 0.3904 | 0.0287 | 0.0000 | 0.0204 | 0.0000 | 0.0000 | 0.0000 | 0.0000 | 0.0040 | 0.0521 | 0.0000 | 0.0000 |
| PSIP1_P163_R   | 0.0278 | 0.0000 | 0.0000 | 0.0000 | 0.0115 | 0.0035 | 0.0144 | 0.0057 | 0.0000 | 0.0000 | 0.0760 | 0.0081 | 0.0000 | 0.0090 | 0.0000 |
| PTCH_E42_F     | 0.0112 | 0.0000 | 0.0886 | 0.5019 | 0.0000 | 0.0018 | 0.1834 | 0.0000 | 0.0000 | 0.0000 | 0.0127 | 0.0097 | 0.0655 | 0.0000 | 0.0143 |
| PTCH2_P568_R   | 0.9737 | 0.0494 | 0.4829 | 0.0120 | 0.9811 | 0.0096 | 0.0344 | 0.0504 | 0.2780 | 0.0000 | 0.3477 | 0.6546 | 0.2707 | 0.0217 | 0.0056 |
| PTEN_P438_F    | 0.0000 | 0.0000 | 0.0035 | 0.0821 | 0.0074 | 0.0061 | 0.1598 | 0.0000 | 0.0000 | 0.0000 | 0.0579 | 0.0055 | 0.0000 | 0.0000 | 0.0046 |
| PTGS1_P2_F     | 0.7940 | 0.0000 | 0.0071 | 0.0175 | 0.2652 | 0.1591 | 0.0188 | 0.0097 | 0.0000 | 0.3279 | 0.0118 | 0.0117 | 0.0021 | 0.0000 | 0.0000 |
| PTGS2_P308_F   | 0.0077 | 0.2142 | 0.0040 | 0.1760 | 0.1262 | 0.0227 | 0.0136 | 0.0085 | 0.0000 | 0.0000 | 0.0085 | 0.0063 | 0.0000 | 0.4590 | 0.0000 |
| PTGS2_P524_R   | 0.2032 | 0.0000 | 0.0067 | 0.0000 | 0.0142 | 0.0068 | 0.0000 | 0.0073 | 0.0000 | 0.0000 | 0.0079 | 0.0038 | 0.0731 | 0.3892 | 0.0062 |
| PTHLH_P15_R    | 0.0000 | 0.4709 | 0.2016 | 0.0000 | 0.0000 | 0.0045 | 0.0486 | 0.0017 | 0.0000 | 0.0000 | 0.9009 | 0.0000 | 0.9173 | 0.0091 | 0.8477 |

|                   |        |        |        |        |        |        |        |        |        |        |        |        |        |        |        |
|-------------------|--------|--------|--------|--------|--------|--------|--------|--------|--------|--------|--------|--------|--------|--------|--------|
| PTHR1_P170_R      | 0.2197 | 0.1143 | 0.9785 | 0.0000 | 0.0000 | 0.0000 | 0.0108 | 0.0059 | 0.9770 | 0.0000 | 0.9832 | 0.8918 | 0.9759 | 0.0000 | 0.0000 |
| PTK2_P735_R       | 0.0154 | 0.0000 | 0.0088 | 0.0000 | 0.0078 | 0.0130 | 0.0153 | 0.3640 | 0.0000 | 0.0000 | 0.2337 | 0.0371 | 0.0000 | 0.0134 | 0.0159 |
| PTK2B_P673_R      | 0.0000 | 0.0000 | 0.0039 | 0.0065 | 0.0000 | 0.0000 | 0.0090 | 0.0000 | 0.0000 | 0.0000 | 0.0078 | 0.0095 | 0.1418 | 0.0000 | 0.0064 |
| PTPN6_E171_R      | 0.0081 | 0.0000 | 0.0000 | 0.0068 | 0.0076 | 0.0000 | 0.0000 | 0.0000 | 0.0000 | 0.0000 | 0.0000 | 0.0016 | 0.0000 | 0.0000 | 0.0000 |
| PTPN6_P282_R      | 0.0091 | 0.0000 | 0.0000 | 0.0000 | 0.0000 | 0.0000 | 0.0043 | 0.0000 | 0.9188 | 0.0000 | 0.0000 | 0.0000 | 0.2823 | 0.0000 | 0.0000 |
| PTPNS1_E433_R     | 0.0000 | 0.0000 | 0.0000 | 0.0000 | 0.0000 | 0.0000 | 0.0000 | 0.0000 | 0.0000 | 0.0000 | 0.0000 | 0.0000 | 0.0000 | 0.0059 | 0.0000 |
| PTPNS1_P301_R     | 0.0000 | 0.0000 | 0.0094 | 0.3710 | 0.0895 | 0.0139 | 0.0000 | 0.0083 | 0.0000 | 0.0000 | 0.0107 | 0.0050 | 0.0025 | 0.0062 | 0.0074 |
| PTPRF_E178_R      | 0.0096 | 0.0000 | 0.0347 | 0.0000 | 0.0049 | 0.0026 | 0.0000 | 0.0020 | 0.0000 | 0.0000 | 0.0078 | 0.3843 | 0.2888 | 0.0014 | 0.0017 |
| PTPRG_E40_R       | 0.1020 | 0.0272 | 0.0133 | 0.2122 | 0.0126 | 0.0179 | 0.0096 | 0.1398 | 0.0000 | 0.0000 | 0.0143 | 0.0184 | 0.0037 | 0.4619 | 0.2515 |
| PTPRG_P476_F      | 0.1049 | 0.0000 | 0.0049 | 0.0046 | 0.1361 | 0.0000 | 0.0346 | 0.1326 | 0.0000 | 0.0000 | 0.0122 | 0.0103 | 0.0000 | 0.0000 | 0.0975 |
| PTPRO_E56_F       | 0.0070 | 0.2100 | 0.0000 | 0.0541 | 0.0156 | 0.0034 | 0.0758 | 0.0045 | 0.0000 | 0.0000 | 0.0018 | 0.0000 | 0.0000 | 0.0131 | 0.0097 |
| PURA_P928_R       | 0.0000 | 0.0000 | 0.0000 | 0.9946 | 0.0000 | 0.0000 | 0.3815 | 0.0000 | 0.0000 | 0.0000 | 0.0000 | 0.0020 | 0.0000 | 0.0054 | 0.0000 |
| PWCR1_P811_F      | 0.9901 | 0.9942 | 0.9798 | 0.0000 | 0.0000 | 0.0000 | 0.0830 | 0.0000 | 0.9808 | 0.9902 | 0.9699 | 0.8861 | 0.9734 | 0.9869 | 0.7218 |
| PYCARD_E87_F      | 0.0382 | 0.0000 | 0.0140 | 0.0706 | 0.0736 | 0.0842 | 0.0106 | 0.0579 | 0.0000 | 0.0000 | 0.0164 | 0.5007 | 0.0044 | 0.0928 | 0.0093 |
| PYCARD_P150_F     | 0.0124 | 0.0120 | 0.3148 | 0.0000 | 0.0095 | 0.0080 | 0.0082 | 0.0230 | 0.0000 | 0.0000 | 0.0352 | 0.0152 | 0.3540 | 0.0048 | 0.0075 |
| RAB32_E314_R      | 0.0000 | 0.0000 | 0.0000 | 0.0214 | 0.0000 | 0.0042 | 0.0000 | 0.0000 | 0.2882 | 0.0000 | 0.0107 | 0.0068 | 0.0235 | 0.0069 | 0.0091 |
| RAB32_P493_R      | 0.0000 | 0.0000 | 0.0000 | 0.0000 | 0.0028 | 0.0013 | 0.0000 | 0.0000 | 0.0000 | 0.0000 | 0.0012 | 0.0000 | 0.0000 | 0.0000 | 0.0000 |
| RAF1_P330_F       | 0.0071 | 0.0000 | 0.0580 | 0.0071 | 0.0000 | 0.0019 | 0.0000 | 0.0002 | 0.0000 | 0.0000 | 0.0023 | 0.3948 | 0.0000 | 0.0007 | 0.0000 |
| RAN_P581_R        | 0.0000 | 0.0000 | 0.8204 | 0.0000 | 0.0000 | 0.0000 | 0.0000 | 0.0016 | 0.0000 | 0.0000 | 0.7029 | 0.0000 | 0.7326 | 0.0000 | 0.9919 |
| RARA_E128_R       | 0.0222 | 0.0000 | 0.1043 | 0.0080 | 0.0000 | 0.0039 | 0.0302 | 0.0000 | 0.0000 | 0.3695 | 0.0086 | 0.0000 | 0.0639 | 0.0000 | 0.4620 |
| RARA_P176_R       | 0.0000 | 0.0000 | 0.0004 | 0.0098 | 0.0000 | 0.0000 | 0.0000 | 0.0000 | 0.6368 | 0.0000 | 0.0009 | 0.0013 | 0.0882 | 0.0000 | 0.0000 |
| RARB_E114_F       | 0.0064 | 0.0000 | 0.0012 | 0.0000 | 0.0000 | 0.0020 | 0.0056 | 0.0000 | 0.0000 | 0.2373 | 0.0057 | 0.0029 | 0.0193 | 0.0057 | 0.0000 |
| RARB_P60_F        | 0.0100 | 0.0000 | 0.0000 | 0.0000 | 0.0000 | 0.0000 | 0.0064 | 0.0028 | 0.0000 | 0.0000 | 0.0000 | 0.0000 | 0.1065 | 0.0000 | 0.0000 |
| RARRES1_E235_F    | 0.0142 | 0.1221 | 0.0420 | 0.0198 | 0.0219 | 0.0095 | 0.0833 | 0.1388 | 0.0000 | 0.0000 | 0.0123 | 0.0097 | 0.0490 | 0.0193 | 0.0065 |
| RASGRF1_E16_F     | 0.0000 | 0.0000 | 0.0057 | 0.0096 | 0.2269 | 0.0037 | 0.0060 | 0.1998 | 0.0000 | 0.0000 | 0.0124 | 0.3263 | 0.0030 | 0.0148 | 0.1659 |
| RASGRF1_P768_F    | 0.0104 | 0.7780 | 0.0049 | 0.5499 | 0.0064 | 0.0000 | 0.0111 | 0.0579 | 0.0000 | 0.0000 | 0.0082 | 0.0973 | 0.0000 | 0.0244 | 0.0948 |
| RASSF1_E116_F     | 0.0113 | 0.0000 | 0.0048 | 0.0000 | 0.4270 | 0.0081 | 0.0104 | 0.4126 | 0.0000 | 0.0000 | 0.0095 | 0.0000 | 0.0000 | 0.0067 | 0.1568 |
| RASSF1_P244_F     | 0.3503 | 0.0000 | 0.0087 | 0.0000 | 0.0000 | 0.1548 | 0.3182 | 0.0000 | 0.0000 | 0.2784 | 0.0089 | 0.0108 | 0.0001 | 0.0000 | 0.0054 |
| RBL2_P250_R       | 0.0104 | 0.0000 | 0.0994 | 0.1823 | 0.0052 | 0.3950 | 0.0000 | 0.0000 | 0.0000 | 0.0000 | 0.0121 | 0.0000 | 0.0000 | 0.0000 | 0.1811 |
| RBP1_E158_F       | 0.0000 | 0.0000 | 0.0000 | 0.0000 | 0.0000 | 0.0000 | 0.0000 | 0.0002 | 0.0000 | 0.0000 | 0.0000 | 0.0000 | 0.0000 | 0.0000 | 0.0000 |
| RBP1_P150_F       | 0.0000 | 0.0000 | 0.0000 | 0.0000 | 0.0000 | 0.0052 | 0.0020 | 0.0000 | 0.0000 | 0.0000 | 0.0000 | 0.0000 | 0.0000 | 0.0000 | 0.0000 |
| RET_P717_F        | 0.0151 | 0.0000 | 0.0752 | 0.0000 | 0.7537 | 0.0065 | 0.3278 | 0.0029 | 0.0000 | 0.0000 | 0.0108 | 0.0164 | 0.0000 | 0.0111 | 0.0048 |
| RET_seq_53_S374_F | 0.1997 | 0.0000 | 0.0053 | 0.0000 | 0.0031 | 0.0767 | 0.0045 | 0.0044 | 0.0000 | 0.0000 | 0.2759 | 0.5292 | 0.0000 | 0.0000 | 0.4108 |

|                 |        |        |        |        |        |        |        |        |        |        |        |        |        |        |        |
|-----------------|--------|--------|--------|--------|--------|--------|--------|--------|--------|--------|--------|--------|--------|--------|--------|
| RHOC_P536_F     | 0.0030 | 0.0000 | 0.0000 | 0.0000 | 0.0029 | 0.0000 | 0.0000 | 0.0021 | 0.0000 | 0.0000 | 0.0044 | 0.0004 | 0.1081 | 0.0000 | 0.0000 |
| RHOH_P121_F     | 0.0084 | 0.0000 | 0.0000 | 0.0000 | 0.0000 | 0.0000 | 0.0000 | 0.0013 | 0.0000 | 0.0000 | 0.0000 | 0.0000 | 0.0000 | 0.0000 | 0.0000 |
| RHOH_P953_R     | 0.9932 | 0.0829 | 0.9534 | 0.0000 | 0.0000 | 0.0000 | 0.0000 | 0.0000 | 0.9849 | 0.7826 | 0.9820 | 0.0023 | 0.9674 | 0.0000 | 0.0000 |
| RIPK1_P868_F    | 0.6499 | 0.4905 | 0.9689 | 0.7103 | 0.5821 | 0.3870 | 0.6455 | 0.4902 | 0.9729 | 0.9832 | 0.9563 | 0.3863 | 0.9729 | 0.8148 | 0.0435 |
| RIPK2_E123_F    | 0.0000 | 0.0000 | 0.1041 | 0.0052 | 0.0000 | 0.0000 | 0.0093 | 0.0000 | 0.0000 | 0.0000 | 0.0073 | 0.0062 | 0.0000 | 0.0000 | 0.0000 |
| RIPK3_P124_F    | 0.3551 | 0.0000 | 0.0074 | 0.0111 | 0.2688 | 0.0040 | 0.0121 | 0.0000 | 0.0000 | 0.0000 | 0.0113 | 0.2683 | 0.0001 | 0.0039 | 0.0069 |
| RIPK3_P24_F     | 0.0118 | 0.0000 | 0.0000 | 0.0000 | 0.0000 | 0.0000 | 0.0000 | 0.0000 | 0.0000 | 0.0000 | 0.0015 | 0.0000 | 0.0000 | 0.0000 | 0.0014 |
| RIPK4_E166_F    | 0.0077 | 0.0000 | 0.0013 | 0.0000 | 0.0000 | 0.0000 | 0.0052 | 0.0038 | 0.3480 | 0.0000 | 0.0038 | 0.0000 | 0.0970 | 0.0046 | 0.0000 |
| RIPK4_P172_F    | 0.0169 | 0.0000 | 0.0748 | 0.0087 | 0.2293 | 0.0076 | 0.0089 | 0.0046 | 0.0000 | 0.5091 | 0.0094 | 0.0075 | 0.0854 | 0.0154 | 0.0094 |
| ROR1_P6_F       | 0.0000 | 0.0000 | 0.0025 | 0.0000 | 0.0000 | 0.0000 | 0.0000 | 0.0000 | 0.0000 | 0.0000 | 0.0000 | 0.0000 | 0.0000 | 0.0000 | 0.0000 |
| ROR2_P317_R     | 0.0000 | 0.0000 | 0.0000 | 0.0000 | 0.0047 | 0.0000 | 0.0000 | 0.0000 | 0.0000 | 0.0000 | 0.0005 | 0.0000 | 0.0000 | 0.0000 | 0.0076 |
| RRAS_P100_R     | 0.0000 | 0.0000 | 0.0000 | 0.0000 | 0.0041 | 0.0026 | 0.0000 | 0.0027 | 0.0000 | 0.0000 | 0.0000 | 0.0000 | 0.0000 | 0.0071 | 0.0000 |
| RUNX3_P247_F    | 0.0000 | 0.0215 | 0.9229 | 0.0000 | 0.0000 | 0.0059 | 0.0000 | 0.0000 | 0.9647 | 0.7343 | 0.0082 | 0.0000 | 0.9622 | 0.0187 | 0.0052 |
| RYK_P493_F      | 0.0000 | 0.0000 | 0.0000 | 0.0000 | 0.0000 | 0.0000 | 0.0000 | 0.0000 | 0.0000 | 0.0000 | 0.8118 | 0.0052 | 0.1058 | 0.0000 | 0.0000 |
| S100A2_E36_R    | 0.0000 | 0.0000 | 0.6422 | 0.0064 | 0.0025 | 0.0000 | 0.0000 | 0.0037 | 0.1957 | 0.0000 | 0.6307 | 0.8141 | 0.5313 | 0.0115 | 0.0000 |
| S100A4_E315_F   | 0.0000 | 0.7271 | 0.0095 | 0.4692 | 0.2136 | 0.0118 | 0.3320 | 0.0077 | 0.5425 | 0.0000 | 0.0129 | 0.0103 | 0.1693 | 0.3194 | 0.0074 |
| SCGB3A1_E55_R   | 0.0000 | 0.0000 | 0.1222 | 0.0000 | 0.0000 | 0.0000 | 0.0000 | 0.0000 | 0.0000 | 0.0000 | 0.0018 | 0.0000 | 0.0000 | 0.0060 | 0.0000 |
| SCGB3A1_P103_R  | 0.1729 | 0.0029 | 0.0039 | 0.0000 | 0.0000 | 0.0000 | 0.0000 | 0.0000 | 0.0000 | 0.0000 | 0.0139 | 0.0000 | 0.0000 | 0.0000 | 0.3353 |
| SEMA3A_P343_F   | 0.0000 | 0.0000 | 0.0001 | 0.0000 | 0.0000 | 0.0000 | 0.0000 | 0.0046 | 0.0000 | 0.0000 | 0.0039 | 0.0042 | 0.0000 | 0.0000 | 0.0000 |
| SEMA3A_P658_R   | 0.0357 | 0.0000 | 0.2032 | 0.1013 | 0.0339 | 0.0154 | 0.0732 | 0.0979 | 0.0000 | 0.7055 | 0.0336 | 0.0291 | 0.2389 | 0.0385 | 0.0892 |
| SEMA3C_E49_R    | 0.0149 | 0.0000 | 0.0990 | 0.0188 | 0.0139 | 0.0153 | 0.2015 | 0.0098 | 0.0011 | 0.0000 | 0.0172 | 0.0109 | 0.0112 | 0.0095 | 0.1271 |
| SEMA3C_P642_F   | 0.1230 | 0.0000 | 0.0167 | 0.0000 | 0.0000 | 0.0000 | 0.0000 | 0.0000 | 0.0000 | 0.0000 | 0.0435 | 0.0130 | 0.0000 | 0.0000 | 0.0541 |
| SEMA3F_E333_R   | 0.0190 | 0.0000 | 0.0048 | 0.0000 | 0.0138 | 0.0000 | 0.0221 | 0.0000 | 0.0000 | 0.0000 | 0.0061 | 0.0075 | 0.0000 | 0.0000 | 0.0007 |
| SEMA3F_P692_R   | 0.0000 | 0.0000 | 0.1419 | 0.0000 | 0.0000 | 0.0000 | 0.0000 | 0.0000 | 0.0000 | 0.5322 | 0.0000 | 0.0070 | 0.0000 | 0.0000 | 0.0000 |
| SEPT5_P441_F    | 0.0121 | 0.0000 | 0.4513 | 0.0483 | 0.1287 | 0.0000 | 0.1267 | 0.1199 | 0.0000 | 0.5529 | 0.6562 | 0.0150 | 0.4007 | 0.0000 | 0.0722 |
| SEPT9_P58_R     | 0.0000 | 0.0000 | 0.7643 | 0.0000 | 0.5284 | 0.3401 | 0.1520 | 0.0000 | 0.9733 | 0.6630 | 0.4127 | 0.0337 | 0.6912 | 0.0000 | 0.9939 |
| SERPINA5_E69_F  | 0.3779 | 0.8474 | 0.6761 | 0.0223 | 0.2790 | 0.9406 | 0.3443 | 0.0129 | 0.3408 | 0.8073 | 0.9801 | 0.3279 | 0.6640 | 0.6152 | 0.9592 |
| SERPIN2_P939_F  | 0.9919 | 0.5315 | 0.9753 | 0.0000 | 0.9932 | 0.9924 | 0.9912 | 0.0000 | 0.9874 | 0.9875 | 0.9844 | 0.9823 | 0.9714 | 0.0000 | 0.0000 |
| SERPINE1_E189_R | 0.0118 | 0.0000 | 0.2988 | 0.0148 | 0.2658 | 0.1430 | 0.0117 | 0.0068 | 0.2083 | 0.0000 | 0.0176 | 0.0087 | 0.0223 | 0.0146 | 0.0125 |
| SEZ6L_P249_F    | 0.0000 | 0.3418 | 0.0032 | 0.0967 | 0.1577 | 0.0013 | 0.0089 | 0.0036 | 0.0000 | 0.0000 | 0.6391 | 0.0024 | 0.0715 | 0.0000 | 0.0000 |
| SEZ6L_P299_F    | 0.0000 | 0.0000 | 0.0051 | 0.0123 | 0.0074 | 0.0000 | 0.0000 | 0.0000 | 0.0000 | 0.0000 | 0.0039 | 0.0022 | 0.0000 | 0.0085 | 0.0037 |
| SFN_E118_F      | 0.9956 | 0.3671 | 0.9702 | 0.9962 | 0.5358 | 0.9935 | 0.9299 | 0.7532 | 0.8734 | 0.7979 | 0.9816 | 0.9912 | 0.9875 | 0.8813 | 0.9929 |
| SFRP1_E398_R    | 0.0748 | 0.0000 | 0.0018 | 0.0000 | 0.0000 | 0.0000 | 0.0000 | 0.0000 | 0.0000 | 0.0000 | 0.0023 | 0.0000 | 0.0000 | 0.0000 | 0.0000 |

|                      |        |        |        |        |        |        |        |        |        |        |        |        |        |        |        |
|----------------------|--------|--------|--------|--------|--------|--------|--------|--------|--------|--------|--------|--------|--------|--------|--------|
| SFRP1_P157_F         | 0.0114 | 0.0000 | 0.0023 | 0.0080 | 0.0082 | 0.0099 | 0.0058 | 0.0025 | 0.0000 | 0.0000 | 0.0074 | 0.0030 | 0.0000 | 0.0096 | 0.0097 |
| SFTPA1_E340_R        | 0.1046 | 0.0000 | 0.9765 | 0.0000 | 0.9948 | 0.0000 | 0.0000 | 0.0000 | 0.9861 | 0.0000 | 0.9869 | 0.9869 | 0.9819 | 0.6128 | 0.0000 |
| SH3BP2_P771_R        | 0.0110 | 0.0000 | 0.0597 | 0.0105 | 0.0000 | 0.0039 | 0.0000 | 0.0000 | 0.6281 | 0.0000 | 0.0000 | 0.0102 | 0.2511 | 0.0100 | 0.0054 |
| SHB_P473_R           | 0.0072 | 0.7063 | 0.0024 | 0.0000 | 0.1229 | 0.0028 | 0.0000 | 0.0110 | 0.0000 | 0.0000 | 0.0052 | 0.0051 | 0.0000 | 0.0142 | 0.0028 |
| SHB_P691_R           | 0.1075 | 0.0000 | 0.0120 | 0.0000 | 0.1237 | 0.1529 | 0.0000 | 0.0107 | 0.0000 | 0.0000 | 0.0113 | 0.0156 | 0.0510 | 0.0102 | 0.0102 |
| SHH_E328_F           | 0.0000 | 0.0000 | 0.0000 | 0.0000 | 0.0000 | 0.0000 | 0.0000 | 0.0000 | 0.0000 | 0.0000 | 0.0000 | 0.0000 | 0.0465 | 0.0000 | 0.0000 |
| SHH_P104_R           | 0.0000 | 0.0000 | 0.0063 | 0.0118 | 0.0089 | 0.0075 | 0.0082 | 0.0000 | 0.7661 | 0.0000 | 0.0190 | 0.0089 | 0.1265 | 0.0089 | 0.4134 |
| SIN3B_P514_R         | 0.0000 | 0.0000 | 0.9796 | 0.0097 | 0.0000 | 0.0000 | 0.0000 | 0.0015 | 0.9708 | 0.9268 | 0.8262 | 0.9836 | 0.9754 | 0.0000 | 0.0000 |
| SKI_E465_R           | 0.0084 | 0.0000 | 0.0802 | 0.0118 | 0.0116 | 0.0027 | 0.0000 | 0.0000 | 0.0000 | 0.0000 | 0.4869 | 0.0045 | 0.0000 | 0.0109 | 0.0000 |
| SLC22A2_E271_R       | 0.4306 | 0.0000 | 0.9836 | 0.0000 | 0.9951 | 0.9925 | 0.0000 | 0.4040 | 0.9840 | 0.9079 | 0.9793 | 0.9903 | 0.9818 | 0.0000 | 0.9289 |
| SLC22A3_P634_F       | 0.0096 | 0.0000 | 0.4399 | 0.0101 | 0.0000 | 0.0152 | 0.9963 | 0.0000 | 0.5862 | 0.6345 | 0.0138 | 0.0057 | 0.4065 | 0.5320 | 0.0044 |
| SLC6A8_seq_28_S227_F | 0.0000 | 0.0000 | 0.5016 | 0.0000 | 0.0000 | 0.0000 | 0.0000 | 0.0000 | 0.0000 | 0.9789 | 0.8849 | 0.0000 | 0.0680 | 0.0000 | 0.0000 |
| SLIT2_P208_F         | 0.0081 | 0.5666 | 0.0093 | 0.5144 | 0.4674 | 0.0989 | 0.2601 | 0.3760 | 0.0000 | 0.0000 | 0.6874 | 0.1086 | 0.0000 | 0.5164 | 0.0061 |
| SMAD2_P708_R         | 0.0082 | 0.0029 | 0.0045 | 0.0023 | 0.0066 | 0.0000 | 0.0047 | 0.0061 | 0.0000 | 0.0000 | 0.0059 | 0.0000 | 0.0000 | 0.0058 | 0.0000 |
| SMAD2_P848_R         | 0.0091 | 0.0000 | 0.0850 | 0.0000 | 0.0000 | 0.0000 | 0.0000 | 0.0000 | 0.0000 | 0.0000 | 0.0043 | 0.0034 | 0.0977 | 0.0000 | 0.0000 |
| SMAD4_P474_R         | 0.0000 | 0.0000 | 0.0000 | 0.0000 | 0.0000 | 0.0000 | 0.0021 | 0.0000 | 0.0000 | 0.0000 | 0.4003 | 0.0000 | 0.0000 | 0.0000 | 0.0000 |
| SMARCA3_E20_F        | 0.0000 | 0.0000 | 0.0021 | 0.0000 | 0.0000 | 0.0000 | 0.0025 | 0.0000 | 0.0000 | 0.0000 | 0.0043 | 0.0024 | 0.1116 | 0.0000 | 0.0004 |
| SMARCA3_P109_R       | 0.0466 | 0.0000 | 0.1181 | 0.4276 | 0.0182 | 0.0116 | 0.6355 | 0.0121 | 0.0000 | 0.0000 | 0.0132 | 0.0290 | 0.0426 | 0.0000 | 0.1940 |
| SMARCA3_P17_R        | 0.0205 | 0.0000 | 0.0025 | 0.0000 | 0.0000 | 0.0000 | 0.0000 | 0.0089 | 0.0000 | 0.0000 | 0.0025 | 0.0000 | 0.0000 | 0.0000 | 0.0000 |
| SMARCA4_P362_R       | 0.0056 | 0.0000 | 0.0064 | 0.0043 | 0.0600 | 0.0058 | 0.1028 | 0.0550 | 0.0000 | 0.4835 | 0.0080 | 0.0053 | 0.0004 | 0.0088 | 0.0042 |
| SMO_E57_F            | 0.0000 | 0.0000 | 0.0014 | 0.0000 | 0.0000 | 0.0012 | 0.0000 | 0.0000 | 0.0000 | 0.0000 | 0.0033 | 0.0000 | 0.0000 | 0.0069 | 0.0000 |
| SOD3_P225_F          | 0.0000 | 0.3995 | 0.8638 | 0.3592 | 0.2043 | 0.0000 | 0.2571 | 0.0000 | 0.9743 | 0.9859 | 0.0097 | 0.0456 | 0.9718 | 0.9928 | 0.1020 |
| SOX1_P1018_R         | 0.0315 | 0.0316 | 0.0048 | 0.0063 | 0.0460 | 0.0000 | 0.0000 | 0.0287 | 0.0000 | 0.0000 | 0.6055 | 0.0031 | 0.0000 | 0.0368 | 0.0023 |
| SOX1_P294_F          | 0.4347 | 0.8265 | 0.1794 | 0.6090 | 0.0165 | 0.0127 | 0.0110 | 0.3075 | 0.0000 | 0.0000 | 0.0114 | 0.0109 | 0.1147 | 0.6625 | 0.0191 |
| SOX17_P287_R         | 0.0000 | 0.0000 | 0.0000 | 0.0000 | 0.0000 | 0.0000 | 0.0000 | 0.0000 | 0.8369 | 0.0000 | 0.0000 | 0.0000 | 0.0000 | 0.0000 | 0.0000 |
| SOX17_P303_F         | 0.6832 | 0.4651 | 0.0908 | 0.7955 | 0.2256 | 0.8147 | 0.4089 | 0.7266 | 0.6987 | 0.3909 | 0.1227 | 0.1644 | 0.1543 | 0.9923 | 0.7405 |
| SOX2_P546_F          | 0.0191 | 0.0000 | 0.0105 | 0.0216 | 0.0151 | 0.2649 | 0.0098 | 0.9929 | 0.0000 | 0.0000 | 0.0090 | 0.0531 | 0.0029 | 0.0273 | 0.2671 |
| SPARC_E50_R          | 0.0101 | 0.0000 | 0.0314 | 0.0096 | 0.0085 | 0.0027 | 0.0077 | 0.0041 | 0.5239 | 0.0000 | 0.2312 | 0.0060 | 0.0401 | 0.0134 | 0.6712 |
| SPARC_P195_F         | 0.1370 | 0.4576 | 0.2124 | 0.0090 | 0.0000 | 0.0000 | 0.0050 | 0.0039 | 0.0000 | 0.0000 | 0.2258 | 0.0052 | 0.3742 | 0.0000 | 0.0028 |
| SPDEF_E116_R         | 0.2035 | 0.8343 | 0.5245 | 0.2262 | 0.1767 | 0.1287 | 0.2603 | 0.1766 | 0.1592 | 0.0181 | 0.0268 | 0.1445 | 0.0215 | 0.5980 | 0.0124 |
| SPI1_E205_F          | 0.1283 | 0.0000 | 0.2879 | 0.1031 | 0.0173 | 0.1768 | 0.3022 | 0.0200 | 0.6393 | 0.0000 | 0.0279 | 0.2235 | 0.3724 | 0.1721 | 0.0202 |
| SPP1_E140_R          | 0.0125 | 0.0000 | 0.0034 | 0.0000 | 0.0115 | 0.0000 | 0.0138 | 0.0083 | 0.0000 | 0.0000 | 0.0086 | 0.0000 | 0.0000 | 0.7966 | 0.0000 |
| SRC_P297_F           | 0.9957 | 0.0000 | 0.9801 | 0.0000 | 0.1607 | 0.3559 | 0.3394 | 0.0954 | 0.9882 | 0.9890 | 0.1730 | 0.9902 | 0.9804 | 0.0000 | 0.9926 |

|                |        |        |        |        |        |        |        |        |        |        |        |        |        |        |        |
|----------------|--------|--------|--------|--------|--------|--------|--------|--------|--------|--------|--------|--------|--------|--------|--------|
| ST6GAL1_P164_R | 0.0000 | 0.4799 | 0.0159 | 0.0000 | 0.0572 | 0.0093 | 0.0248 | 0.0000 | 0.0000 | 0.0000 | 0.0526 | 0.0000 | 0.0018 | 0.0147 | 0.1237 |
| ST6GAL1_P528_F | 0.0000 | 0.4240 | 0.1275 | 0.0000 | 0.0000 | 0.0000 | 0.0051 | 0.0000 | 0.0000 | 0.0000 | 0.5484 | 0.0024 | 0.1634 | 0.0171 | 0.0035 |
| STK23_E182_R   | 0.0043 | 0.0000 | 0.8890 | 0.0000 | 0.0000 | 0.9950 | 0.0000 | 0.0000 | 0.8344 | 0.8751 | 0.4721 | 0.0051 | 0.9819 | 0.0310 | 0.0000 |
| SYK_E372_F     | 0.1250 | 0.0000 | 0.0173 | 0.0000 | 0.0099 | 0.0076 | 0.1563 | 0.0116 | 0.0000 | 0.0000 | 0.0131 | 0.0094 | 0.0165 | 0.0616 | 0.2183 |
| TAL1_E122_F    | 0.4588 | 0.7790 | 0.0050 | 0.6080 | 0.0109 | 0.0110 | 0.5089 | 0.4346 | 0.0000 | 0.0000 | 0.0103 | 0.0062 | 0.0000 | 0.1210 | 0.0120 |
| TAL1_P594_F    | 0.0934 | 0.2513 | 0.0619 | 0.0000 | 0.0000 | 0.0000 | 0.1439 | 0.1623 | 0.0000 | 0.0000 | 0.0016 | 0.0022 | 0.0000 | 0.0000 | 0.0000 |
| TAL1_P817_F    | 0.0095 | 0.0000 | 0.0000 | 0.0000 | 0.0000 | 0.0000 | 0.0000 | 0.0000 | 0.0000 | 0.0000 | 0.0000 | 0.0000 | 0.6572 | 0.0000 | 0.0000 |
| TCF4_P175_R    | 0.0000 | 0.0171 | 0.0000 | 0.0000 | 0.0000 | 0.0000 | 0.0000 | 0.0000 | 0.0000 | 0.0000 | 0.0000 | 0.0000 | 0.0000 | 0.0000 | 0.0000 |
| TCF7L2_E411_F  | 0.0000 | 0.0000 | 0.0011 | 0.0055 | 0.0059 | 0.0011 | 0.0000 | 0.0000 | 0.0000 | 0.0000 | 0.0040 | 0.0021 | 0.0000 | 0.0039 | 0.0049 |
| TCF7L2_P193_R  | 0.0000 | 0.0000 | 0.0021 | 0.0100 | 0.0047 | 0.0059 | 0.0046 | 0.0053 | 0.0000 | 0.0000 | 0.0040 | 0.0057 | 0.0000 | 0.0069 | 0.0000 |
| TERT_E20_F     | 0.1479 | 0.0000 | 0.0103 | 0.0115 | 0.0087 | 0.0051 | 0.0141 | 0.0046 | 0.0000 | 0.0000 | 0.0165 | 0.0091 | 0.0545 | 0.0851 | 0.2859 |
| TERT_P360_R    | 0.2114 | 0.5722 | 0.0680 | 0.6651 | 0.0871 | 0.0275 | 0.4190 | 0.6262 | 0.0000 | 0.7139 | 0.0149 | 0.0223 | 0.1999 | 0.0265 | 0.2075 |
| TES_E172_F     | 0.0146 | 0.0000 | 0.0217 | 0.0000 | 0.0078 | 0.0000 | 0.0000 | 0.0000 | 0.0000 | 0.0000 | 0.0047 | 0.0023 | 0.3549 | 0.0000 | 0.0000 |
| TESK2_P252_R   | 0.0093 | 0.0184 | 0.1141 | 0.0172 | 0.0138 | 0.0551 | 0.0416 | 0.0042 | 0.0000 | 0.0000 | 0.0078 | 0.0382 | 0.0000 | 0.0084 | 0.0058 |
| TFAP2C_E260_F  | 0.0114 | 0.0000 | 0.0000 | 0.0000 | 0.0575 | 0.0000 | 0.0088 | 0.0000 | 0.0000 | 0.0000 | 0.3959 | 0.0029 | 0.0000 | 0.0000 | 0.0000 |
| TFAP2C_P765_F  | 0.0000 | 0.0000 | 0.0088 | 0.0056 | 0.0080 | 0.0546 | 0.0089 | 0.0000 | 0.0000 | 0.0000 | 0.0134 | 0.0136 | 0.0000 | 0.0081 | 0.0000 |
| TFF2_P178_F    | 0.7642 | 0.5828 | 0.9698 | 0.8819 | 0.8254 | 0.9860 | 0.8412 | 0.7927 | 0.9810 | 0.2984 | 0.9818 | 0.9855 | 0.9809 | 0.9959 | 0.7759 |
| TFF2_P557_R    | 0.9950 | 0.7073 | 0.9844 | 0.2232 | 0.1555 | 0.2945 | 0.0000 | 0.1037 | 0.9901 | 0.0000 | 0.9006 | 0.0835 | 0.9868 | 0.9945 | 0.9930 |
| TFPI2_E141_F   | 0.0084 | 0.0000 | 0.0000 | 0.0068 | 0.0000 | 0.0000 | 0.0000 | 0.0008 | 0.0000 | 0.0000 | 0.0000 | 0.0002 | 0.0000 | 0.0064 | 0.0000 |
| TFPI2_P152_R   | 0.5317 | 0.1369 | 0.0162 | 0.0353 | 0.1569 | 0.0122 | 0.3732 | 0.4195 | 0.0000 | 0.0000 | 0.0331 | 0.0133 | 0.1166 | 0.3193 | 0.4587 |
| TFPI2_P9_F     | 0.0304 | 0.7308 | 0.0153 | 0.5801 | 0.5716 | 0.0094 | 0.0373 | 0.5992 | 0.0000 | 0.0000 | 0.0195 | 0.0125 | 0.0045 | 0.4412 | 0.5407 |
| TFRC_P414_R    | 0.4307 | 0.2433 | 0.0047 | 0.0137 | 0.1728 | 0.1142 | 0.2214 | 0.0559 | 0.0000 | 0.0000 | 0.0192 | 0.0000 | 0.0000 | 0.0000 | 0.0000 |
| TGFA_P558_F    | 0.0137 | 0.0000 | 0.0080 | 0.0176 | 0.0000 | 0.4038 | 0.0000 | 0.3961 | 0.0000 | 0.0000 | 0.0131 | 0.0119 | 0.0060 | 0.0138 | 0.4419 |
| TGFA_P642_R    | 0.0088 | 0.0000 | 0.0013 | 0.0000 | 0.0000 | 0.0000 | 0.0000 | 0.0000 | 0.0000 | 0.0000 | 0.0054 | 0.0027 | 0.0000 | 0.0000 | 0.0000 |
| TGFB1_P833_R   | 0.0000 | 0.0000 | 0.9837 | 0.0000 | 0.0000 | 0.0000 | 0.0032 | 0.0000 | 0.9660 | 0.9813 | 0.9837 | 0.9894 | 0.9813 | 0.9948 | 0.8623 |
| TGFB2_E226_R   | 0.0249 | 0.0000 | 0.3731 | 0.0000 | 0.0000 | 0.0144 | 0.0000 | 0.0079 | 0.0000 | 0.0000 | 0.0063 | 0.0081 | 0.1176 | 0.0000 | 0.0036 |
| TGFB2_P632_F   | 0.0113 | 0.1004 | 0.0137 | 0.5514 | 0.0092 | 0.0179 | 0.0145 | 0.0088 | 0.0000 | 0.0000 | 0.0223 | 0.0097 | 0.0083 | 0.0123 | 0.0000 |
| TGFB3_E58_R    | 0.9943 | 0.6837 | 0.9885 | 0.0000 | 0.9867 | 0.0000 | 0.0000 | 0.9937 | 0.9829 | 0.8566 | 0.9871 | 0.9906 | 0.9875 | 0.9949 | 0.0000 |
| TGFBI_P173_F   | 0.2708 | 0.0000 | 0.1721 | 0.0000 | 0.0114 | 0.1465 | 0.0099 | 0.0072 | 0.0000 | 0.0000 | 0.0179 | 0.0106 | 0.6370 | 0.0000 | 0.1534 |
| TGFBI_P31_R    | 0.0135 | 0.0000 | 0.3185 | 0.0000 | 0.0000 | 0.0046 | 0.0076 | 0.0038 | 0.0000 | 0.0000 | 0.2146 | 0.0052 | 0.1275 | 0.0070 | 0.0142 |
| TGFBR3_E188_R  | 0.0059 | 0.0000 | 0.0007 | 0.0000 | 0.0000 | 0.0040 | 0.0076 | 0.0000 | 0.0000 | 0.0000 | 0.0080 | 0.0053 | 0.0000 | 0.0000 | 0.0000 |
| TGFBR3_P429_F  | 0.0000 | 0.0000 | 0.0000 | 0.0113 | 0.0044 | 0.0004 | 0.0000 | 0.0061 | 0.0000 | 0.4660 | 0.0041 | 0.0040 | 0.0000 | 0.0034 | 0.0028 |
| THBS1_E207_R   | 0.0960 | 0.0000 | 0.0037 | 0.0000 | 0.0000 | 0.0000 | 0.0089 | 0.0000 | 0.0000 | 0.0000 | 0.0067 | 0.0075 | 0.0000 | 0.0117 | 0.0008 |

|                   |        |        |        |        |        |        |        |        |        |        |        |        |        |        |        |
|-------------------|--------|--------|--------|--------|--------|--------|--------|--------|--------|--------|--------|--------|--------|--------|--------|
| THBS1_P500_F      | 0.0181 | 0.0000 | 0.0938 | 0.0109 | 0.0168 | 0.0076 | 0.0030 | 0.0145 | 0.0018 | 0.0000 | 0.0240 | 0.0153 | 0.0935 | 0.0284 | 0.0099 |
| THBS2_E129_F      | 0.0061 | 0.0000 | 0.0023 | 0.0000 | 0.0000 | 0.0033 | 0.0692 | 0.0000 | 0.0000 | 0.0000 | 0.0058 | 0.0037 | 0.0000 | 0.0000 | 0.0042 |
| THY1_P149_R       | 0.0172 | 0.3485 | 0.0349 | 0.0233 | 0.0159 | 0.0204 | 0.3143 | 0.0116 | 0.0149 | 0.0000 | 0.0260 | 0.0199 | 0.0197 | 0.3188 | 0.3707 |
| TIAM1_P188_R      | 0.0000 | 0.0000 | 0.0000 | 0.0000 | 0.0000 | 0.0031 | 0.0064 | 0.0000 | 0.0000 | 0.0000 | 0.7408 | 0.0000 | 0.0000 | 0.0000 | 0.0042 |
| TIMP1_E254_R      | 0.0095 | 0.0000 | 0.4533 | 0.0461 | 0.0526 | 0.0081 | 0.0084 | 0.0528 | 0.0000 | 0.0000 | 0.0170 | 0.0098 | 0.5798 | 0.0450 | 0.0482 |
| TIMP1_P615_R      | 0.9893 | 0.0000 | 0.9717 | 0.0000 | 0.0090 | 0.0000 | 0.9927 | 0.0000 | 0.9717 | 0.7428 | 0.9745 | 0.0040 | 0.9713 | 0.9898 | 0.0000 |
| TIMP2_E394_R      | 0.2627 | 0.0000 | 0.0081 | 0.0000 | 0.0000 | 0.0000 | 0.0000 | 0.0020 | 0.0000 | 0.0000 | 0.0082 | 0.0015 | 0.0000 | 0.0057 | 0.0000 |
| TIMP2_P267_F      | 0.0126 | 0.0030 | 0.0757 | 0.0064 | 0.0028 | 0.0000 | 0.0039 | 0.0000 | 0.0000 | 0.0000 | 0.0013 | 0.0000 | 0.0000 | 0.0023 | 0.7687 |
| TIMP3_P1114_R     | 0.9948 | 0.8011 | 0.9871 | 0.9956 | 0.2758 | 0.2075 | 0.9941 | 0.9935 | 0.9881 | 0.9078 | 0.9882 | 0.9904 | 0.9853 | 0.9933 | 0.9940 |
| TIMP3_P690_R      | 0.0929 | 0.7452 | 0.9885 | 0.0000 | 0.8722 | 0.0000 | 0.9953 | 0.9960 | 0.9816 | 0.9914 | 0.9920 | 0.9891 | 0.9881 | 0.0000 | 0.9046 |
| TIMP3_seq_7_S38_F | 0.0367 | 0.0000 | 0.1208 | 0.3739 | 0.1202 | 0.0000 | 0.1183 | 0.0000 | 0.0000 | 0.0000 | 0.0097 | 0.1161 | 0.0002 | 0.0133 | 0.0060 |
| TJP1_P326_R       | 0.0668 | 0.0211 | 0.0143 | 0.1761 | 0.0262 | 0.0294 | 0.1000 | 0.1009 | 0.0000 | 0.0000 | 0.0264 | 0.0581 | 0.0070 | 0.0395 | 0.1074 |
| TJP1_P390_F       | 0.0349 | 0.0000 | 0.0055 | 0.0000 | 0.0052 | 0.0023 | 0.0069 | 0.0000 | 0.0000 | 0.0000 | 0.0105 | 0.0074 | 0.0000 | 0.0147 | 0.0038 |
| TK1_E47_F         | 0.3533 | 0.7331 | 0.0369 | 0.3466 | 0.4452 | 0.5075 | 0.0063 | 0.3938 | 0.8716 | 0.0000 | 0.9478 | 0.2422 | 0.2920 | 0.2207 | 0.2121 |
| TK1_P62_R         | 0.0000 | 0.0008 | 0.0074 | 0.0191 | 0.0000 | 0.0025 | 0.4780 | 0.3678 | 0.0000 | 0.0000 | 0.0086 | 0.0117 | 0.0018 | 0.0993 | 0.2223 |
| TMEFF1_E180_R     | 0.0000 | 0.0000 | 0.0057 | 0.0000 | 0.0000 | 0.0000 | 0.0000 | 0.0000 | 0.0000 | 0.0000 | 0.0000 | 0.0114 | 0.0000 | 0.0132 | 0.0000 |
| TMEFF1_P234_F     | 0.0000 | 0.0000 | 0.0000 | 0.0000 | 0.0000 | 0.0000 | 0.0060 | 0.0000 | 0.0000 | 0.0000 | 0.0022 | 0.0000 | 0.0000 | 0.0000 | 0.0004 |
| TMEFF2_P152_R     | 0.2762 | 0.1297 | 0.1003 | 0.3305 | 0.3780 | 0.3956 | 0.0539 | 0.3235 | 0.0518 | 0.0763 | 0.0690 | 0.0458 | 0.0632 | 0.4124 | 0.0694 |
| TMEFF2_P210_R     | 0.0000 | 0.0000 | 0.4695 | 0.0000 | 0.0000 | 0.0000 | 0.0085 | 0.0034 | 0.0000 | 0.0000 | 0.0000 | 0.0000 | 0.0000 | 0.0086 | 0.0000 |
| TMEM63A_E63_F     | 0.0000 | 0.0000 | 0.0000 | 0.0000 | 0.0006 | 0.0000 | 0.0000 | 0.0000 | 0.0000 | 0.0000 | 0.0013 | 0.0000 | 0.0000 | 0.0000 | 0.0000 |
| TMPRSS4_E83_F     | 0.9911 | 0.0000 | 0.9826 | 0.0000 | 0.0281 | 0.0027 | 0.0194 | 0.0000 | 0.9833 | 0.9923 | 0.9323 | 0.0010 | 0.9854 | 0.0051 | 0.0018 |
| TMPRSS4_P552_F    | 0.6838 | 0.0746 | 0.9782 | 0.5643 | 0.6200 | 0.0106 | 0.0668 | 0.0108 | 0.9777 | 0.0000 | 0.0361 | 0.9882 | 0.4324 | 0.6643 | 0.9803 |
| TNC_P198_F        | 0.0000 | 0.1069 | 0.4526 | 0.0000 | 0.0000 | 0.0000 | 0.0065 | 0.0029 | 0.8778 | 0.0000 | 0.0000 | 0.0034 | 0.0000 | 0.0279 | 0.0000 |
| TNC_P57_F         | 0.0155 | 0.1832 | 0.0217 | 0.0169 | 0.0099 | 0.0108 | 0.4787 | 0.0078 | 0.0000 | 0.0000 | 0.0090 | 0.0106 | 0.0858 | 0.5002 | 0.1407 |
| TNF_P1084_F       | 0.9943 | 0.6551 | 0.9865 | 0.9966 | 0.3522 | 0.2327 | 0.9969 | 0.9956 | 0.9867 | 0.9487 | 0.9802 | 0.9904 | 0.9737 | 0.9942 | 0.9930 |
| TNF_P158_F        | 0.0000 | 0.0000 | 0.0000 | 0.0072 | 0.0043 | 0.0000 | 0.0665 | 0.0000 | 0.0000 | 0.0000 | 0.0076 | 0.0000 | 0.0000 | 0.0049 | 0.0000 |
| TNFRSF10A_P171_F  | 0.1054 | 0.0000 | 0.0074 | 0.0000 | 0.0127 | 0.0064 | 0.0077 | 0.1543 | 0.0000 | 0.0000 | 0.0078 | 0.0104 | 0.0029 | 0.0119 | 0.0072 |
| TNFRSF10A_P91_F   | 0.0269 | 0.0000 | 0.0002 | 0.0000 | 0.0000 | 0.0032 | 0.0000 | 0.0000 | 0.0000 | 0.0000 | 0.0078 | 0.0026 | 0.0053 | 0.0177 | 0.0025 |
| TNFRSF10B_P108_R  | 0.0863 | 0.0000 | 0.0228 | 0.0143 | 0.1105 | 0.0176 | 0.0684 | 0.0761 | 0.4198 | 0.0145 | 0.0198 | 0.0134 | 0.0679 | 0.0366 | 0.0159 |
| TNFRSF10C_E109_F  | 0.0304 | 0.0000 | 0.0027 | 0.0325 | 0.0052 | 0.0218 | 0.2744 | 0.0500 | 0.0000 | 0.0000 | 0.0025 | 0.0000 | 0.0000 | 0.0100 | 0.0000 |
| TNFRSF10D_E27_F   | 0.0000 | 0.0000 | 0.0041 | 0.0000 | 0.0067 | 0.0136 | 0.0026 | 0.0023 | 0.0000 | 0.0000 | 0.0103 | 0.0064 | 0.0510 | 0.0066 | 0.0000 |
| TNFRSF10D_P70_F   | 0.0672 | 0.0000 | 0.0245 | 0.3099 | 0.0188 | 0.0298 | 0.1282 | 0.1779 | 0.0000 | 0.0000 | 0.0373 | 0.1038 | 0.0121 | 0.0116 | 0.0697 |
| TNFRSF1B_E5_F     | 0.0134 | 0.0000 | 0.0125 | 0.0000 | 0.0159 | 0.0000 | 0.0000 | 0.0000 | 0.0000 | 0.0000 | 0.3713 | 0.0000 | 0.0023 | 0.0000 | 0.0055 |

|                   |        |        |        |        |        |        |        |        |        |        |        |        |        |        |        |
|-------------------|--------|--------|--------|--------|--------|--------|--------|--------|--------|--------|--------|--------|--------|--------|--------|
| TNFRSF1B_P167_F   | 0.0043 | 0.0000 | 0.0036 | 0.0055 | 0.0053 | 0.0000 | 0.0000 | 0.0000 | 0.0000 | 0.0000 | 0.0038 | 0.0000 | 0.0851 | 0.0000 | 0.0042 |
| TNFSF10_E53_F     | 0.0096 | 0.0000 | 0.0603 | 0.0105 | 0.0058 | 0.0043 | 0.0287 | 0.0000 | 0.1578 | 0.0000 | 0.0114 | 0.0089 | 0.0035 | 0.0000 | 0.3424 |
| TNFSF10_P2_R      | 0.0000 | 0.0000 | 0.0002 | 0.0000 | 0.0000 | 0.0000 | 0.4654 | 0.0000 | 0.4972 | 0.0000 | 0.9741 | 0.2564 | 0.0000 | 0.0167 | 0.0000 |
| TNFSF8_E258_R     | 0.0119 | 0.0000 | 0.0703 | 0.0000 | 0.0059 | 0.0034 | 0.0120 | 0.0020 | 0.0000 | 0.0000 | 0.0063 | 0.0065 | 0.1042 | 0.9533 | 0.0028 |
| TNFSF8_P184_F     | 0.0070 | 0.0000 | 0.0026 | 0.0128 | 0.0062 | 0.0009 | 0.0033 | 0.0109 | 0.0000 | 0.0000 | 0.8955 | 0.0044 | 0.0000 | 0.0090 | 0.0000 |
| TNK1_P41_R        | 0.0285 | 0.6664 | 0.2705 | 0.7987 | 0.3241 | 0.1273 | 0.7353 | 0.0135 | 0.0000 | 0.0000 | 0.0189 | 0.0220 | 0.2965 | 0.0155 | 0.0052 |
| TP73_E155_F       | 0.4460 | 0.2826 | 0.0675 | 0.6217 | 0.6192 | 0.0064 | 0.9954 | 0.5094 | 0.5424 | 0.0000 | 0.0138 | 0.0063 | 0.0052 | 0.0197 | 0.0076 |
| TP73_P496_F       | 0.0000 | 0.0000 | 0.0367 | 0.0000 | 0.0064 | 0.0053 | 0.0000 | 0.0000 | 0.6443 | 0.0000 | 0.0138 | 0.0067 | 0.0000 | 0.0099 | 0.0038 |
| TP73_P945_F       | 0.0097 | 0.0000 | 0.0738 | 0.0126 | 0.0088 | 0.8963 | 0.0473 | 0.0000 | 0.0000 | 0.0000 | 0.0097 | 0.0073 | 0.1064 | 0.0173 | 0.0721 |
| TPEF_seq_44_S36_F | 0.0780 | 0.0000 | 0.0065 | 0.4524 | 0.0000 | 0.0000 | 0.0070 | 0.0038 | 0.0000 | 0.0000 | 0.0195 | 0.0080 | 0.0000 | 0.0000 | 0.0000 |
| TPEF_seq_44_S88_R | 0.1780 | 0.0000 | 0.0129 | 0.0450 | 0.0242 | 0.0081 | 0.0089 | 0.0639 | 0.0000 | 0.0000 | 0.0093 | 0.5230 | 0.0079 | 0.5984 | 0.0270 |
| TRIM29_P261_F     | 0.8563 | 0.9703 | 0.9804 | 0.9035 | 0.9957 | 0.8908 | 0.8412 | 0.9920 | 0.9850 | 0.9872 | 0.9856 | 0.6685 | 0.9827 | 0.9146 | 0.8177 |
| TRIP6_E33_F       | 0.1726 | 0.3890 | 0.0071 | 0.3858 | 0.0101 | 0.1648 | 0.0077 | 0.0145 | 0.0000 | 0.0000 | 0.0128 | 0.2272 | 0.1579 | 0.1067 | 0.0074 |
| TSG101_P257_R     | 0.0086 | 0.0000 | 0.1409 | 0.0000 | 0.0035 | 0.0008 | 0.0007 | 0.0000 | 0.0000 | 0.9535 | 0.0063 | 0.0028 | 0.1498 | 0.9832 | 0.0000 |
| TUBB3_E91_F       | 0.9691 | 0.0000 | 0.3690 | 0.0027 | 0.9745 | 0.0008 | 0.5716 | 0.0013 | 0.1306 | 0.0000 | 0.0090 | 0.6471 | 0.0421 | 0.0000 | 0.0011 |
| TUBB3_P364_F      | 0.0000 | 0.0000 | 0.0000 | 0.0000 | 0.0000 | 0.0000 | 0.0082 | 0.0000 | 0.0000 | 0.0000 | 0.0000 | 0.0000 | 0.0000 | 0.0000 | 0.0000 |
| TUBB3_P721_R      | 0.0000 | 0.0000 | 0.0000 | 0.0000 | 0.0000 | 0.0083 | 0.0084 | 0.0000 | 0.0000 | 0.0000 | 0.0027 | 0.0000 | 0.0000 | 0.0003 | 0.0042 |
| TUSC3_E29_R       | 0.0000 | 0.0000 | 0.0046 | 0.0000 | 0.0061 | 0.0035 | 0.0091 | 0.0000 | 0.0000 | 0.0000 | 0.0155 | 0.0064 | 0.0000 | 0.0100 | 0.0799 |
| TUSC3_P85_R       | 0.0000 | 0.0000 | 0.0085 | 0.0000 | 0.0000 | 0.0116 | 0.0184 | 0.0089 | 0.0000 | 0.0000 | 0.0076 | 0.0000 | 0.0000 | 0.0211 | 0.0062 |
| TWIST1_E117_R     | 0.0000 | 0.0000 | 0.0000 | 0.0000 | 0.0000 | 0.0000 | 0.0000 | 0.0000 | 0.0000 | 0.0000 | 0.0000 | 0.0008 | 0.0000 | 0.0000 | 0.0000 |
| TWIST1_P355_R     | 0.0000 | 0.0000 | 0.0031 | 0.0065 | 0.2822 | 0.0152 | 0.0046 | 0.0000 | 0.0000 | 0.0000 | 0.0106 | 0.0057 | 0.0000 | 0.0074 | 0.0000 |
| TWIST1_P44_R      | 0.0000 | 0.0000 | 0.0000 | 0.0058 | 0.0175 | 0.0000 | 0.0000 | 0.0000 | 0.0000 | 0.0000 | 0.0000 | 0.0000 | 0.0000 | 0.0000 | 0.0000 |
| TYRO3_P501_F      | 0.0000 | 0.0000 | 0.0000 | 0.0000 | 0.0000 | 0.0033 | 0.0030 | 0.0000 | 0.0000 | 0.0000 | 0.0036 | 0.0023 | 0.0000 | 0.0000 | 0.0000 |
| UBA52_P293_R      | 0.0095 | 0.0000 | 0.0000 | 0.0000 | 0.0000 | 0.0000 | 0.9877 | 0.0000 | 0.0000 | 0.0000 | 0.0073 | 0.0000 | 0.0000 | 0.0000 | 0.0000 |
| UGT1A1_E11_F      | 0.9949 | 0.0000 | 0.9860 | 0.9949 | 0.0000 | 0.9939 | 0.0000 | 0.9943 | 0.9889 | 0.9825 | 0.9811 | 0.9092 | 0.9846 | 0.7074 | 0.9938 |
| UGT1A1_P564_R     | 0.1020 | 0.3490 | 0.9462 | 0.9479 | 0.9424 | 0.1755 | 0.9620 | 0.5939 | 0.9925 | 0.8772 | 0.8736 | 0.9205 | 0.9233 | 0.7617 | 0.9217 |
| UGT1A7_P751_R     | 0.9940 | 0.0152 | 0.9859 | 0.0000 | 0.9942 | 0.7819 | 0.0000 | 0.9926 | 0.9889 | 0.9889 | 0.9829 | 0.1702 | 0.9826 | 0.0000 | 0.0000 |
| UNG_P170_F        | 0.0000 | 0.0000 | 0.0444 | 0.0154 | 0.0256 | 0.0046 | 0.0000 | 0.0000 | 0.0000 | 0.0000 | 0.0160 | 0.0377 | 0.0009 | 0.0000 | 0.0108 |
| USP29_E274_F      | 0.9945 | 0.6210 | 0.9861 | 0.0000 | 0.9946 | 0.0000 | 0.6143 | 0.0000 | 0.9895 | 0.9883 | 0.9892 | 0.9887 | 0.9834 | 0.9927 | 0.9923 |
| USP29_P282_R      | 0.0000 | 0.0000 | 0.9721 | 0.9970 | 0.0000 | 0.0000 | 0.0000 | 0.0000 | 0.9194 | 0.9772 | 0.9818 | 0.0000 | 0.9775 | 0.0000 | 0.0000 |
| VAMP8_P114_F      | 0.0110 | 0.0000 | 0.0124 | 0.1856 | 0.0572 | 0.0087 | 0.0093 | 0.1411 | 0.0010 | 0.0000 | 0.0195 | 0.0090 | 0.0086 | 0.0742 | 0.1037 |
| VAV1_E9_F         | 0.0960 | 0.0000 | 0.0118 | 0.0097 | 0.0000 | 0.0074 | 0.0000 | 0.0000 | 0.0000 | 0.0000 | 0.0142 | 0.0116 | 0.0056 | 0.0000 | 0.0032 |
| VAV1_P317_F       | 0.0000 | 0.1522 | 0.0006 | 0.0000 | 0.0000 | 0.7699 | 0.0000 | 0.0000 | 0.0000 | 0.0000 | 0.0064 | 0.0000 | 0.1072 | 0.0127 | 0.0000 |

|                |        |        |        |        |        |        |        |        |        |        |        |        |        |        |        |
|----------------|--------|--------|--------|--------|--------|--------|--------|--------|--------|--------|--------|--------|--------|--------|--------|
| VAV2_E58_F     | 0.0182 | 0.2317 | 0.0223 | 0.1820 | 0.1287 | 0.0091 | 0.0119 | 0.0099 | 0.0086 | 0.1211 | 0.0240 | 0.0094 | 0.0707 | 0.0466 | 0.0277 |
| VAV2_P1182_F   | 0.0000 | 0.0000 | 0.0000 | 0.0000 | 0.0000 | 0.0000 | 0.0000 | 0.0000 | 0.0000 | 0.0000 | 0.0000 | 0.0000 | 0.0000 | 0.0034 | 0.0064 |
| VBP1_P12_R     | 0.0000 | 0.0000 | 0.1831 | 0.0000 | 0.9887 | 0.0212 | 0.0000 | 0.0000 | 0.0000 | 0.6656 | 0.0103 | 0.0000 | 0.8827 | 0.0450 | 0.0000 |
| VEGFB_P658_F   | 0.0294 | 0.0000 | 0.1061 | 0.0097 | 0.0000 | 0.0557 | 0.0404 | 0.0305 | 0.0000 | 0.0000 | 0.0266 | 0.0047 | 0.0000 | 0.0125 | 0.0029 |
| VIM_P811_R     | 0.0000 | 0.0000 | 0.0000 | 0.0056 | 0.0000 | 0.0000 | 0.0000 | 0.0024 | 0.0000 | 0.0000 | 0.0024 | 0.0031 | 0.0000 | 0.0000 | 0.0000 |
| WEE1_P924_R    | 0.9954 | 0.6432 | 0.9847 | 0.0000 | 0.0000 | 0.9949 | 0.0000 | 0.9935 | 0.9900 | 0.9899 | 0.8359 | 0.8033 | 0.9832 | 0.9961 | 0.9960 |
| WNT2_E109_R    | 0.0000 | 0.0000 | 0.0000 | 0.0000 | 0.0000 | 0.0000 | 0.0000 | 0.0000 | 0.0000 | 0.0000 | 0.0000 | 0.0000 | 0.0000 | 0.0000 | 0.0000 |
| WNT2_P217_F    | 0.2049 | 0.2822 | 0.1221 | 0.2419 | 0.0773 | 0.2140 | 0.2733 | 0.0306 | 0.0395 | 0.0227 | 0.0317 | 0.0271 | 0.0908 | 0.1910 | 0.2179 |
| WNT2B_P1185_R  | 0.4598 | 0.0000 | 0.0240 | 0.3793 | 0.0000 | 0.0000 | 0.0238 | 0.2058 | 0.2709 | 0.0000 | 0.0578 | 0.0089 | 0.0082 | 0.0000 | 0.0087 |
| WNT5A_E43_F    | 0.0207 | 0.1047 | 0.0178 | 0.2999 | 0.2280 | 0.0200 | 0.2774 | 0.0110 | 0.0000 | 0.0118 | 0.0588 | 0.0086 | 0.0345 | 0.0250 | 0.0112 |
| WNT5A_P655_F   | 0.3158 | 0.0000 | 0.0044 | 0.0000 | 0.0000 | 0.0051 | 0.0000 | 0.0000 | 0.0000 | 0.0000 | 0.0052 | 0.0055 | 0.0000 | 0.0000 | 0.0021 |
| WNT8B_E487_F   | 0.4000 | 0.2575 | 0.9723 | 0.5031 | 0.9943 | 0.4351 | 0.3754 | 0.5689 | 0.9784 | 0.9710 | 0.4290 | 0.9891 | 0.9728 | 0.6941 | 0.3134 |
| WNT8B_P216_R   | 0.9919 | 0.0000 | 0.9764 | 0.0000 | 0.0013 | 0.0000 | 0.0000 | 0.9917 | 0.9864 | 0.9867 | 0.9769 | 0.0000 | 0.9739 | 0.0000 | 0.0000 |
| WRN_E57_F      | 0.3149 | 0.0000 | 0.1720 | 0.2019 | 0.2538 | 0.3913 | 0.2511 | 0.3422 | 0.3801 | 0.0000 | 0.0281 | 0.0151 | 0.0211 | 0.0659 | 0.3067 |
| WRN_P969_F     | 0.9946 | 0.5573 | 0.9780 | 0.9960 | 0.0000 | 0.0000 | 0.9951 | 0.0000 | 0.9893 | 0.9728 | 0.9904 | 0.0000 | 0.9596 | 0.0092 | 0.0000 |
| WT1_E32_F      | 0.0000 | 0.0000 | 0.0107 | 0.0000 | 0.0000 | 0.0715 | 0.0113 | 0.1370 | 0.0000 | 0.0000 | 0.0034 | 0.3182 | 0.0015 | 0.0131 | 0.0021 |
| WT1_P853_F     | 0.0110 | 0.0000 | 0.0047 | 0.0000 | 0.0000 | 0.0267 | 0.0000 | 0.0000 | 0.0000 | 0.0000 | 0.0174 | 0.0000 | 0.1901 | 0.6070 | 0.0020 |
| XRCC1_P681_R   | 0.4231 | 0.3363 | 0.9816 | 0.0000 | 0.8945 | 0.9157 | 0.0000 | 0.0034 | 0.9782 | 0.9528 | 0.9549 | 0.9890 | 0.9821 | 0.9931 | 0.9900 |
| XRCC2_P1077_F  | 0.3928 | 0.8686 | 0.9863 | 0.9973 | 0.9929 | 0.0000 | 0.9952 | 0.9942 | 0.9885 | 0.9881 | 0.9918 | 0.9912 | 0.9846 | 0.9946 | 0.9866 |
| YES1_P600_F    | 0.0097 | 0.0000 | 0.0140 | 0.0110 | 0.0107 | 0.0078 | 0.0617 | 0.0054 | 0.0000 | 0.0000 | 0.0237 | 0.0175 | 0.0104 | 0.0904 | 0.0146 |
| ZIM3_E203_F    | 0.9948 | 0.5259 | 0.9820 | 0.9957 | 0.0000 | 0.0000 | 0.0000 | 0.9921 | 0.9886 | 0.9893 | 0.9853 | 0.9893 | 0.9814 | 0.9927 | 0.9915 |
| ZIM3_P451_R    | 0.4833 | 0.7007 | 0.9847 | 0.9956 | 0.9940 | 0.9932 | 0.9955 | 0.9965 | 0.9890 | 0.9777 | 0.9892 | 0.8236 | 0.9856 | 0.0000 | 0.9933 |
| ZIM3_P718_R    | 0.0000 | 0.1655 | 0.9793 | 0.9955 | 0.0000 | 0.9932 | 0.0000 | 0.9926 | 0.9856 | 0.0000 | 0.9880 | 0.9869 | 0.9803 | 0.5711 | 0.0000 |
| ZMYND10_E77_R  | 0.0072 | 0.0000 | 0.0008 | 0.0000 | 0.0000 | 0.0000 | 0.0000 | 0.0000 | 0.3206 | 0.0000 | 0.5644 | 0.0000 | 0.1352 | 0.0000 | 0.0000 |
| ZNF215_P71_R   | 0.0099 | 0.0000 | 0.2503 | 0.0112 | 0.0000 | 0.0046 | 0.0069 | 0.0008 | 0.0000 | 0.0000 | 0.2554 | 0.0089 | 0.2822 | 0.0112 | 0.0000 |
| ZNF264_E48_R   | 0.0000 | 0.0000 | 0.0000 | 0.0016 | 0.0000 | 0.0000 | 0.0037 | 0.0000 | 0.0000 | 0.0000 | 0.0054 | 0.0001 | 0.0000 | 0.0000 | 0.0000 |
| ZNFN1A1_E102_F | 0.0175 | 0.1773 | 0.9217 | 0.1784 | 0.9582 | 0.0000 | 0.9928 | 0.9897 | 0.9821 | 0.8436 | 0.7058 | 0.9866 | 0.9793 | 0.9851 | 0.0115 |
| ZNFN1A1_P179_F | 0.9944 | 0.6668 | 0.9834 | 0.0000 | 0.4021 | 0.9952 | 0.3947 | 0.9180 | 0.9867 | 0.9886 | 0.9841 | 0.9864 | 0.9833 | 0.2555 | 0.1063 |



| TargetID        | BWS32  | BWS33  | BWS34  | BWS35  | BWS36  | BWS37  | BWS38  | BWS39  | BWS40  | BWS41  | BWS42  | BWS43  | BWS44  | BWS45  | BWS46  |
|-----------------|--------|--------|--------|--------|--------|--------|--------|--------|--------|--------|--------|--------|--------|--------|--------|
| AATK_E63_R      | 0.0074 | 0.0000 | 0.0662 | 0.0000 | 0.0067 | 0.0000 | 0.1740 | 0.9028 | 0.9463 | 0.0096 | 0.2062 | 0.0000 | 0.9929 | 0.9808 | 0.7370 |
| ABCA1_E120_R    | 0.0000 | 0.9943 | 0.9913 | 0.0000 | 0.9900 | 0.0000 | 0.9861 | 0.9614 | 0.9838 | 0.9890 | 0.9773 | 0.9917 | 0.8690 | 0.9865 | 0.9881 |
| ABCA1_P45_F     | 0.0000 | 0.9932 | 0.9893 | 0.0000 | 0.0000 | 0.0000 | 0.9942 | 0.9847 | 0.9819 | 0.0000 | 0.9461 | 0.9878 | 0.0000 | 0.9758 | 0.9887 |
| ABCB4_E429_F    | 0.0042 | 0.0000 | 0.0005 | 0.0000 | 0.0014 | 0.0000 | 0.0000 | 0.0059 | 0.0049 | 0.0000 | 0.0612 | 0.0045 | 0.0047 | 0.0046 | 0.0000 |
| ABCC2_P88_F     | 0.0207 | 0.0000 | 0.0171 | 0.1009 | 0.0162 | 0.0141 | 0.2262 | 0.0206 | 0.0196 | 0.0000 | 0.9902 | 0.0428 | 0.1345 | 0.9007 | 0.7021 |
| ABCC5_P444_F    | 0.0077 | 0.0260 | 0.3316 | 0.0014 | 0.0062 | 0.0235 | 0.0063 | 0.1078 | 0.5900 | 0.0079 | 0.0065 | 0.0106 | 0.0097 | 0.1688 | 0.0000 |
| ABCG2_P178_R    | 0.9822 | 0.0338 | 0.0361 | 0.1235 | 0.0887 | 0.3730 | 0.3867 | 0.4998 | 0.4953 | 0.0329 | 0.6107 | 0.0537 | 0.0319 | 0.0338 | 0.0160 |
| ABCG2_P310_R    | 0.9886 | 0.0000 | 0.9715 | 0.0000 | 0.0000 | 0.0000 | 0.0181 | 0.9863 | 0.9774 | 0.0000 | 0.0000 | 0.0000 | 0.9876 | 0.9854 | 0.9845 |
| ABL1_P53_F      | 0.9758 | 0.3457 | 0.4812 | 0.2672 | 0.9924 | 0.4400 | 0.3765 | 0.6908 | 0.8591 | 0.3107 | 0.9672 | 0.9907 | 0.3339 | 0.0319 | 0.9193 |
| ABL2_P459_R     | 0.0000 | 0.0000 | 0.0000 | 0.0000 | 0.0000 | 0.0000 | 0.0124 | 0.0000 | 0.0000 | 0.0000 | 0.0045 | 0.0000 | 0.0000 | 0.0000 | 0.0000 |
| ABO_E110_F      | 0.0647 | 0.0061 | 0.1474 | 0.0000 | 0.0050 | 0.0000 | 0.0000 | 0.0090 | 0.2620 | 0.0077 | 0.0090 | 0.0000 | 0.1987 | 0.0063 | 0.0000 |
| ABO_P312_F      | 0.0092 | 0.0106 | 0.0085 | 0.0000 | 0.8947 | 0.0956 | 0.0074 | 0.3841 | 0.0152 | 0.0311 | 0.0090 | 0.0102 | 0.0104 | 0.0107 | 0.0000 |
| ACTG2_P455_R    | 0.0000 | 0.0000 | 0.0009 | 0.0000 | 0.0000 | 0.0000 | 0.0000 | 0.0000 | 0.0067 | 0.0000 | 0.0000 | 0.0000 | 0.0000 | 0.0000 | 0.0000 |
| ACVR1_P983_F    | 0.0051 | 0.0000 | 0.0000 | 0.0000 | 0.0000 | 0.0000 | 0.0000 | 0.0051 | 0.0022 | 0.0011 | 0.0000 | 0.0000 | 0.0000 | 0.0000 | 0.0000 |
| ACVR1B_E497_R   | 0.0173 | 0.0000 | 0.0180 | 0.4344 | 0.2337 | 0.0000 | 0.1192 | 0.0173 | 0.0334 | 0.0000 | 0.2025 | 0.0170 | 0.0069 | 0.0060 | 0.0000 |
| ACVR1B_P572_R   | 0.0203 | 0.3240 | 0.0222 | 0.0580 | 0.9890 | 0.2976 | 0.2815 | 0.0114 | 0.0184 | 0.4125 | 0.0163 | 0.5687 | 0.0202 | 0.0222 | 0.0000 |
| ACVR1C_P115_R   | 0.0039 | 0.0000 | 0.0003 | 0.0000 | 0.0000 | 0.0027 | 0.0000 | 0.0061 | 0.0065 | 0.0057 | 0.0042 | 0.0048 | 0.0039 | 0.0038 | 0.0000 |
| ACVR1C_P363_F   | 0.9930 | 0.7869 | 0.0433 | 0.0000 | 0.9927 | 0.0074 | 0.9935 | 0.9863 | 0.9845 | 0.9951 | 0.0000 | 0.9929 | 0.9935 | 0.9882 | 0.9871 |
| ACVR2B_E27_R    | 0.9904 | 0.0000 | 0.9910 | 0.0000 | 0.9897 | 0.3282 | 0.1816 | 0.9804 | 0.8036 | 0.1396 | 0.6610 | 0.6307 | 0.9742 | 0.9868 | 0.0000 |
| ACVR2B_P676_F   | 0.0000 | 0.0000 | 0.0049 | 0.0403 | 0.0000 | 0.0000 | 0.0113 | 0.0000 | 0.0000 | 0.0000 | 0.0731 | 0.0000 | 0.0000 | 0.0000 | 0.0000 |
| ADAMTS12_P250_R | 0.0060 | 0.0088 | 0.0000 | 0.0000 | 0.0021 | 0.0000 | 0.0000 | 0.0013 | 0.0000 | 0.0000 | 0.0031 | 0.0000 | 0.0000 | 0.0000 | 0.0000 |
| ADCYAP1_E163_R  | 0.0074 | 0.1380 | 0.0000 | 0.0000 | 0.0096 | 0.0000 | 0.0099 | 0.0168 | 0.0101 | 0.0000 | 0.1273 | 0.0000 | 0.0000 | 0.0035 | 0.0000 |
| ADCYAP1_P398_F  | 0.9370 | 0.9550 | 0.9239 | 0.9020 | 0.9207 | 0.9746 | 0.9931 | 0.9844 | 0.9844 | 0.9535 | 0.9893 | 0.9901 | 0.9897 | 0.8641 | 0.8404 |
| ADCYAP1_P455_R  | 0.0397 | 0.0151 | 0.0499 | 0.0366 | 0.8052 | 0.1274 | 0.1889 | 0.0243 | 0.0309 | 0.6713 | 0.0099 | 0.0412 | 0.0102 | 0.8671 | 0.0000 |
| AFF3_P122_F     | 0.7232 | 0.0000 | 0.0000 | 0.5853 | 0.0033 | 0.0000 | 0.0076 | 0.2375 | 0.0086 | 0.0133 | 0.4450 | 0.0000 | 0.0251 | 0.0039 | 0.1817 |
| AFF3_P808_F     | 0.0000 | 0.0000 | 0.0000 | 0.0000 | 0.0000 | 0.0000 | 0.0095 | 0.0037 | 0.0077 | 0.0000 | 0.0431 | 0.0088 | 0.0000 | 0.0066 | 0.6400 |
| AFP_P824_F      | 0.1285 | 0.0064 | 0.0191 | 0.0000 | 0.5604 | 0.0075 | 0.2978 | 0.0118 | 0.0137 | 0.1025 | 0.2492 | 0.0132 | 0.0079 | 0.0103 | 0.0000 |
| AGTR1_P154_F    | 0.0010 | 0.0000 | 0.0002 | 0.0000 | 0.0023 | 0.0000 | 0.0000 | 0.0000 | 0.0009 | 0.0000 | 0.0025 | 0.0001 | 0.0060 | 0.0000 | 0.0000 |
| AGTR1_P41_F     | 0.0165 | 0.2390 | 0.3367 | 0.4594 | 0.4391 | 0.4544 | 0.1629 | 0.0336 | 0.0207 | 0.0226 | 0.0472 | 0.0283 | 0.0152 | 0.0210 | 0.0000 |
| AHR_E103_F      | 0.0124 | 0.0000 | 0.0000 | 0.0000 | 0.0000 | 0.9706 | 0.9889 | 0.9625 | 0.9773 | 0.0000 | 0.9324 | 0.0000 | 0.0000 | 0.9823 | 0.9515 |
| AHR_P166_R      | 0.5832 | 0.5141 | 0.6769 | 0.4645 | 0.7823 | 0.0049 | 0.4115 | 0.6616 | 0.7120 | 0.8947 | 0.8359 | 0.6056 | 0.4220 | 0.7375 | 0.6837 |

|                |        |        |        |        |        |        |        |        |        |        |        |        |        |        |        |
|----------------|--------|--------|--------|--------|--------|--------|--------|--------|--------|--------|--------|--------|--------|--------|--------|
| AIM2_E208_F    | 0.3165 | 0.5724 | 0.0210 | 0.0000 | 0.2937 | 0.5103 | 0.0000 | 0.0182 | 0.0155 | 0.0121 | 0.0074 | 0.0712 | 0.0114 | 0.0119 | 0.2372 |
| AKT1_P310_R    | 0.0102 | 0.0086 | 0.0096 | 0.0000 | 0.0032 | 0.0000 | 0.0096 | 0.0116 | 0.0091 | 0.0092 | 0.0054 | 0.0046 | 0.0123 | 0.5699 | 0.0000 |
| ALK_P28_F      | 0.2197 | 0.0495 | 0.0035 | 0.0000 | 0.0038 | 0.0059 | 0.0084 | 0.0131 | 0.1460 | 0.9716 | 0.0018 | 0.0089 | 0.0109 | 0.5546 | 0.1091 |
| ALOX12_E85_R   | 0.0037 | 0.0000 | 0.0019 | 0.0000 | 0.0000 | 0.0000 | 0.0041 | 0.0015 | 0.0000 | 0.0000 | 0.0000 | 0.0000 | 0.0035 | 0.0012 | 0.0000 |
| ALOX12_P223_R  | 0.9895 | 0.0000 | 0.6314 | 0.0000 | 0.0000 | 0.9941 | 0.8653 | 0.0263 | 0.9799 | 0.0000 | 0.9882 | 0.9828 | 0.0000 | 0.9681 | 0.9699 |
| APBA1_E99_R    | 0.0000 | 0.0000 | 0.0000 | 0.0000 | 0.9854 | 0.0000 | 0.0000 | 0.0000 | 0.0000 | 0.0000 | 0.0000 | 0.6386 | 0.0000 | 0.0000 | 0.1652 |
| APBA1_P644_F   | 0.0000 | 0.0000 | 0.0000 | 0.0000 | 0.0000 | 0.0000 | 0.0056 | 0.0000 | 0.0000 | 0.0000 | 0.0000 | 0.0000 | 0.0000 | 0.0000 | 0.0000 |
| APBA2_P227_F   | 0.0047 | 0.0000 | 0.0015 | 0.0000 | 0.0000 | 0.0000 | 0.0000 | 0.0000 | 0.0042 | 0.0000 | 0.0000 | 0.0075 | 0.0042 | 0.0000 | 0.0000 |
| APC_P280_R     | 0.0000 | 0.9950 | 0.0000 | 0.0000 | 0.0000 | 0.0000 | 0.0000 | 0.0000 | 0.9275 | 0.0000 | 0.0000 | 0.0000 | 0.0000 | 0.9886 | 0.0000 |
| APOA1_P75_F    | 0.2098 | 0.0144 | 0.0081 | 0.6319 | 0.0000 | 0.1727 | 0.0000 | 0.0045 | 0.0000 | 0.0000 | 0.0000 | 0.0103 | 0.0000 | 0.0000 | 0.0000 |
| APOC1_P406_R   | 0.0058 | 0.5776 | 0.3519 | 0.5463 | 0.0037 | 0.3322 | 0.1063 | 0.3602 | 0.0101 | 0.0062 | 0.0087 | 0.0044 | 0.0061 | 0.0098 | 0.7807 |
| APP_E8_F       | 0.0108 | 0.0000 | 0.0000 | 0.4438 | 0.1102 | 0.0056 | 0.0056 | 0.0050 | 0.0029 | 0.0084 | 0.0062 | 0.0039 | 0.0031 | 0.0000 | 0.0000 |
| APP_P179_R     | 0.0129 | 0.2062 | 0.0212 | 0.0000 | 0.5984 | 0.3429 | 0.2124 | 0.0275 | 0.0261 | 0.1865 | 0.3103 | 0.0220 | 0.3300 | 0.0307 | 0.0000 |
| AR_P189_R      | 0.1670 | 0.3965 | 0.0071 | 0.0000 | 0.1492 | 0.0531 | 0.0000 | 0.0104 | 0.0153 | 0.0357 | 0.2153 | 0.0091 | 0.2334 | 0.1109 | 0.0000 |
| AREG_E25_F     | 0.0000 | 0.0000 | 0.0010 | 0.0000 | 0.0000 | 0.0000 | 0.0000 | 0.0046 | 0.0021 | 0.0063 | 0.0000 | 0.0032 | 0.0032 | 0.0032 | 0.0000 |
| ARHGDI1_P148_R | 0.0140 | 0.1331 | 0.0323 | 0.0000 | 0.2588 | 0.1586 | 0.0244 | 0.2416 | 0.6803 | 0.0225 | 0.0231 | 0.0277 | 0.0135 | 0.4173 | 0.0033 |
| ARNT_P238_R    | 0.3832 | 0.0083 | 0.0036 | 0.0614 | 0.0415 | 0.0000 | 0.5160 | 0.0148 | 0.0112 | 0.1022 | 0.0100 | 0.0000 | 0.0028 | 0.0166 | 0.0000 |
| ASB4_P391_F    | 0.0000 | 0.0000 | 0.1596 | 0.0000 | 0.0522 | 0.0000 | 0.0000 | 0.0046 | 0.0150 | 0.1026 | 0.0042 | 0.0070 | 0.0000 | 0.0026 | 0.0000 |
| ASB4_P52_R     | 0.0000 | 0.0000 | 0.0072 | 0.0000 | 0.0043 | 0.0000 | 0.0083 | 0.0038 | 0.0061 | 0.0077 | 0.0000 | 0.0072 | 0.0000 | 0.0000 | 0.0000 |
| ASCL1_E24_F    | 0.0000 | 0.0000 | 0.0000 | 0.0000 | 0.0000 | 0.0000 | 0.0000 | 0.0000 | 0.0000 | 0.0000 | 0.0000 | 0.0000 | 0.0021 | 0.0000 | 0.0000 |
| ASCL1_P747_F   | 0.1832 | 0.0410 | 0.0452 | 0.0000 | 0.9899 | 0.0000 | 0.0897 | 0.0050 | 0.4566 | 0.0000 | 0.0596 | 0.1017 | 0.0064 | 0.1504 | 0.0000 |
| ASCL2_E76_R    | 0.0000 | 0.0000 | 0.0000 | 0.0000 | 0.0011 | 0.0000 | 0.0000 | 0.0013 | 0.0000 | 0.0000 | 0.0000 | 0.0000 | 0.0000 | 0.0026 | 0.0000 |
| ASCL2_P360_F   | 0.0014 | 0.0034 | 0.0000 | 0.0000 | 0.0000 | 0.0039 | 0.0066 | 0.0014 | 0.0000 | 0.0000 | 0.0057 | 0.9760 | 0.0000 | 0.0000 | 0.0000 |
| ASCL2_P609_R   | 0.0000 | 0.0130 | 0.0000 | 0.0125 | 0.0000 | 0.0000 | 0.0131 | 0.0000 | 0.0000 | 0.0127 | 0.0077 | 0.0000 | 0.0017 | 0.0000 | 0.0000 |
| ATP10A_P147_F  | 0.0049 | 0.0000 | 0.0068 | 0.0000 | 0.0082 | 0.0000 | 0.0000 | 0.0069 | 0.0069 | 0.0062 | 0.0000 | 0.1305 | 0.0000 | 0.0252 | 0.0000 |
| ATP10A_P524_R  | 0.0197 | 0.0000 | 0.0085 | 0.2214 | 0.2617 | 0.0000 | 0.0184 | 0.0225 | 0.0146 | 0.0000 | 0.0000 | 0.0166 | 0.0761 | 0.0105 | 0.0000 |
| AXIN1_P995_R   | 0.4376 | 0.0119 | 0.0109 | 0.8226 | 0.0245 | 0.5986 | 0.5200 | 0.0170 | 0.0181 | 0.4529 | 0.0117 | 0.0204 | 0.0129 | 0.0134 | 0.0000 |
| AXL_E61_F      | 0.0045 | 0.0000 | 0.0002 | 0.0000 | 0.0050 | 0.0000 | 0.0042 | 0.0024 | 0.0014 | 0.0058 | 0.0061 | 0.0000 | 0.0041 | 0.0049 | 0.0000 |
| BAX_E281_R     | 0.6125 | 0.0180 | 0.0963 | 0.0000 | 0.0131 | 0.0055 | 0.0288 | 0.0197 | 0.0239 | 0.0210 | 0.6101 | 0.0165 | 0.0119 | 0.0982 | 0.0000 |
| BCAM_E100_R    | 0.0153 | 0.0068 | 0.0140 | 0.0000 | 0.0090 | 0.3607 | 0.0000 | 0.0114 | 0.0126 | 0.0113 | 0.0091 | 0.0113 | 0.0082 | 0.0103 | 0.3069 |
| BCAM_P205_F    | 0.1704 | 0.0037 | 0.0097 | 0.0000 | 0.0056 | 0.0046 | 0.9942 | 0.0191 | 0.4488 | 0.0123 | 0.0209 | 0.0250 | 0.2336 | 0.0123 | 0.0000 |
| BCAP31_P1131_F | 0.0159 | 0.0099 | 0.0150 | 0.9598 | 0.0136 | 0.8495 | 0.6179 | 0.0179 | 0.0198 | 0.0277 | 0.0205 | 0.0305 | 0.0137 | 0.0127 | 0.0000 |
| BCL2L2_E172_F  | 0.0058 | 0.0000 | 0.0000 | 0.0000 | 0.0000 | 0.0000 | 0.0032 | 0.0000 | 0.0013 | 0.0000 | 0.0022 | 0.0000 | 0.0000 | 0.0019 | 0.0000 |

|                 |        |        |        |        |        |        |        |        |        |        |        |        |        |        |        |
|-----------------|--------|--------|--------|--------|--------|--------|--------|--------|--------|--------|--------|--------|--------|--------|--------|
| BCL2L2_P280_F   | 0.0000 | 0.0049 | 0.0000 | 0.0000 | 0.0059 | 0.0000 | 0.0000 | 0.1743 | 0.0085 | 0.0000 | 0.0089 | 0.0055 | 0.0013 | 0.0065 | 0.0000 |
| BCL3_E71_F      | 0.0042 | 0.0000 | 0.0000 | 0.0000 | 0.0013 | 0.0000 | 0.0000 | 0.0038 | 0.0038 | 0.0074 | 0.0034 | 0.0051 | 0.0042 | 0.0032 | 0.0000 |
| BCL3_P1038_R    | 0.0151 | 0.2035 | 0.0110 | 0.0791 | 0.2545 | 0.3906 | 0.0077 | 0.0069 | 0.0122 | 0.0188 | 0.0061 | 0.0118 | 0.0093 | 0.0066 | 0.0000 |
| BCL6_P248_R     | 0.0000 | 0.0138 | 0.0043 | 0.0000 | 0.0016 | 0.0000 | 0.0038 | 0.0063 | 0.0056 | 0.0025 | 0.0000 | 0.0000 | 0.0057 | 0.0000 | 0.0000 |
| BDNF_E19_R      | 0.0050 | 0.0800 | 0.1428 | 0.0000 | 0.0021 | 0.0028 | 0.0041 | 0.0474 | 0.0415 | 0.0109 | 0.0326 | 0.0072 | 0.1378 | 0.0307 | 0.0091 |
| BDNF_P259_R     | 0.4705 | 0.5521 | 0.9909 | 0.8839 | 0.5030 | 0.7871 | 0.5370 | 0.9763 | 0.9841 | 0.9929 | 0.9927 | 0.9918 | 0.9881 | 0.9809 | 0.9875 |
| BGN_E282_R      | 0.0000 | 0.0042 | 0.0023 | 0.0000 | 0.0044 | 0.0000 | 0.0072 | 0.0056 | 0.0051 | 0.0088 | 0.0000 | 0.0032 | 0.0056 | 0.0040 | 0.0000 |
| BGN_P333_R      | 0.0053 | 0.0207 | 0.0095 | 0.5955 | 0.0026 | 0.9966 | 0.0050 | 0.2191 | 0.0049 | 0.0256 | 0.0044 | 0.6976 | 0.0044 | 0.2246 | 0.4794 |
| BIRC4_P122_R    | 0.2824 | 0.0161 | 0.5487 | 0.0000 | 0.2508 | 0.0000 | 0.4021 | 0.0122 | 0.0118 | 0.0085 | 0.0110 | 0.7719 | 0.2455 | 0.0155 | 0.4150 |
| BIRC5_E89_F     | 0.0579 | 0.0124 | 0.0106 | 0.0000 | 0.0888 | 0.0076 | 0.0098 | 0.0133 | 0.0140 | 0.0617 | 0.0788 | 0.0205 | 0.0135 | 0.0101 | 0.0000 |
| BLK_P14_F       | 0.0056 | 0.0092 | 0.4921 | 0.0000 | 0.0061 | 0.0024 | 0.1593 | 0.0104 | 0.0079 | 0.1612 | 0.0103 | 0.2323 | 0.2163 | 0.0075 | 0.0000 |
| BMP2_E48_R      | 0.3150 | 0.3914 | 0.0131 | 0.8376 | 0.3313 | 0.6767 | 0.2440 | 0.6087 | 0.0094 | 0.5485 | 0.2776 | 0.0226 | 0.0108 | 0.3033 | 0.0000 |
| BMP2_P1201_F    | 0.0009 | 0.0006 | 0.0000 | 0.0000 | 0.0000 | 0.0000 | 0.0000 | 0.0000 | 0.0029 | 0.0000 | 0.0000 | 0.0008 | 0.0028 | 0.0000 | 0.0000 |
| BMP3_E147_F     | 0.0000 | 0.0028 | 0.0000 | 0.0000 | 0.0000 | 0.0000 | 0.0000 | 0.0000 | 0.0000 | 0.0000 | 0.0000 | 0.0000 | 0.0000 | 0.0001 | 0.3165 |
| BMP3_P56_R      | 0.0054 | 0.0000 | 0.0000 | 0.0000 | 0.0000 | 0.0035 | 0.0000 | 0.0000 | 0.0063 | 0.0000 | 0.0042 | 0.0020 | 0.0000 | 0.0040 | 0.0000 |
| BMP4_P199_R     | 0.6136 | 0.7003 | 0.0071 | 0.0000 | 0.0602 | 0.1168 | 0.1032 | 0.8509 | 0.0185 | 0.1079 | 0.0850 | 0.0108 | 0.0417 | 0.0272 | 0.0000 |
| BMP6_P398_F     | 0.9927 | 0.0000 | 0.8862 | 0.0000 | 0.9922 | 0.2697 | 0.9955 | 0.9889 | 0.9847 | 0.0000 | 0.0000 | 0.0000 | 0.9900 | 0.9731 | 0.9828 |
| BMPR1A_P956_F   | 0.0137 | 0.1365 | 0.0067 | 0.0000 | 0.4141 | 0.0039 | 0.0078 | 0.0100 | 0.3672 | 0.1881 | 0.2212 | 0.0153 | 0.7753 | 0.0269 | 0.0000 |
| BMPR2_E435_F    | 0.0000 | 0.0000 | 0.0000 | 0.0000 | 0.0000 | 0.0000 | 0.0000 | 0.0000 | 0.0000 | 0.0000 | 0.0000 | 0.0000 | 0.0000 | 0.0000 | 0.0000 |
| BMPR2_P1271_F   | 0.4342 | 0.0035 | 0.0156 | 0.0000 | 0.5109 | 0.6413 | 0.0000 | 0.0148 | 0.2831 | 0.0000 | 0.0048 | 0.0065 | 0.0186 | 0.0363 | 0.0000 |
| BSG_P211_R      | 0.1257 | 0.1121 | 0.0782 | 0.1695 | 0.0639 | 0.4493 | 0.4843 | 0.0836 | 0.0842 | 0.3253 | 0.0665 | 0.1089 | 0.1185 | 0.0604 | 0.0735 |
| BTK_P105_F      | 0.0119 | 0.1440 | 0.0067 | 0.0000 | 0.2089 | 0.2224 | 0.1250 | 0.0135 | 0.0119 | 0.0097 | 0.0110 | 0.0177 | 0.0138 | 0.0169 | 0.0000 |
| C20orf47_P225_R | 0.0000 | 0.0070 | 0.0000 | 0.0000 | 0.0163 | 0.0000 | 0.0000 | 0.0000 | 0.0000 | 0.0000 | 0.0917 | 0.0085 | 0.0047 | 0.0062 | 0.0000 |
| CALCA_E174_R    | 0.1526 | 0.1577 | 0.7281 | 0.2586 | 0.7474 | 0.0630 | 0.1485 | 0.0986 | 0.0818 | 0.1636 | 0.5719 | 0.8183 | 0.6437 | 0.0609 | 0.0824 |
| CAPG_E228_F     | 0.0000 | 0.0027 | 0.0000 | 0.0000 | 0.0000 | 0.0000 | 0.0041 | 0.0087 | 0.0957 | 0.9939 | 0.0032 | 0.0033 | 0.0030 | 0.0077 | 0.0000 |
| CASP10_E139_F   | 0.0031 | 0.0000 | 0.0157 | 0.0000 | 0.0040 | 0.0000 | 0.0000 | 0.0049 | 0.0050 | 0.0084 | 0.0060 | 0.0117 | 0.0737 | 0.0000 | 0.0000 |
| CASP10_P186_F   | 0.0000 | 0.0000 | 0.0000 | 0.0000 | 0.0000 | 0.9948 | 0.9921 | 0.9794 | 0.9351 | 0.8567 | 0.0845 | 0.0000 | 0.0000 | 0.0024 | 0.9673 |
| CASP2_P192_F    | 0.0501 | 0.0228 | 0.0571 | 0.1068 | 0.0353 | 0.3382 | 0.0331 | 0.0368 | 0.0313 | 0.0463 | 0.0243 | 0.0494 | 0.0620 | 0.0263 | 0.0216 |
| CASP3_P420_R    | 0.0000 | 0.0000 | 0.0049 | 0.0000 | 0.0022 | 0.0000 | 0.0000 | 0.0075 | 0.0074 | 0.0000 | 0.0008 | 0.0000 | 0.0018 | 0.0098 | 0.0000 |
| CASP6_P201_F    | 0.0351 | 0.0000 | 0.0084 | 0.0000 | 0.9867 | 0.0000 | 0.0108 | 0.4301 | 0.8149 | 0.0670 | 0.1694 | 0.8844 | 0.9862 | 0.9841 | 0.0000 |
| CASP6_P230_R    | 0.0006 | 0.0167 | 0.0059 | 0.0000 | 0.0620 | 0.0010 | 0.0413 | 0.0095 | 0.3473 | 0.0059 | 0.0353 | 0.0127 | 0.0060 | 0.0073 | 0.5321 |
| CAV1_P130_R     | 0.0257 | 0.3943 | 0.0101 | 0.1150 | 0.0543 | 0.0052 | 0.2869 | 0.0081 | 0.0062 | 0.0119 | 0.2369 | 0.1001 | 0.2937 | 0.0065 | 0.0000 |
| CAV1_P169_F     | 0.1682 | 0.1573 | 0.1120 | 0.1139 | 0.0122 | 0.1272 | 0.1822 | 0.0250 | 0.0157 | 0.1643 | 0.1636 | 0.2430 | 0.0182 | 0.0125 | 0.0022 |

|              |        |        |        |        |        |        |        |        |        |        |        |        |        |        |        |
|--------------|--------|--------|--------|--------|--------|--------|--------|--------|--------|--------|--------|--------|--------|--------|--------|
| CAV2_E33_R   | 0.6615 | 0.0106 | 0.0121 | 0.0000 | 0.2010 | 0.2167 | 0.0414 | 0.6324 | 0.4495 | 0.1571 | 0.1673 | 0.4745 | 0.0098 | 0.6286 | 0.2147 |
| CCKBR_P361_R | 0.0104 | 0.0658 | 0.0189 | 0.0534 | 0.0076 | 0.2214 | 0.0108 | 0.0722 | 0.0143 | 0.0117 | 0.0115 | 0.0097 | 0.0107 | 0.0107 | 0.0000 |
| CCKBR_P480_F | 0.0072 | 0.0081 | 0.0000 | 0.5891 | 0.0011 | 0.0000 | 0.0000 | 0.0076 | 0.0000 | 0.0067 | 0.0001 | 0.0000 | 0.0021 | 0.0000 | 0.0000 |
| CCNA1_E7_F   | 0.0000 | 0.9334 | 0.1676 | 0.0000 | 0.9886 | 0.0000 | 0.0000 | 0.0177 | 0.9796 | 0.0000 | 0.9881 | 0.9848 | 0.7351 | 0.9839 | 0.7840 |
| CCNA1_P216_F | 0.0000 | 0.0000 | 0.0000 | 0.0000 | 0.0000 | 0.0000 | 0.0078 | 0.0000 | 0.8916 | 0.0064 | 0.0011 | 0.0000 | 0.0100 | 0.0000 | 0.0000 |
| CCNC_P132_R  | 0.0000 | 0.0000 | 0.0033 | 0.0000 | 0.0000 | 0.0000 | 0.0000 | 0.0069 | 0.0063 | 0.0125 | 0.0024 | 0.0074 | 0.0000 | 0.0017 | 0.0000 |
| CCND1_E280_R | 0.0000 | 0.0000 | 0.0000 | 0.0000 | 0.0030 | 0.0015 | 0.0000 | 0.6522 | 0.2044 | 0.0156 | 0.0000 | 0.9847 | 0.0000 | 0.0008 | 0.5605 |
| CCND1_P343_R | 0.0000 | 0.0000 | 0.0000 | 0.0000 | 0.0000 | 0.0000 | 0.0000 | 0.0000 | 0.0000 | 0.0000 | 0.0024 | 0.0000 | 0.0000 | 0.0000 | 0.0000 |
| CCND2_P887_F | 0.0000 | 0.0000 | 0.0026 | 0.0000 | 0.0015 | 0.0000 | 0.0000 | 0.0000 | 0.0000 | 0.0000 | 0.0000 | 0.0000 | 0.0025 | 0.0000 | 0.0000 |
| CCND2_P898_R | 0.4858 | 0.4391 | 0.7699 | 0.3434 | 0.7140 | 0.7433 | 0.3967 | 0.9870 | 0.0790 | 0.3891 | 0.5064 | 0.6865 | 0.5039 | 0.0659 | 0.8093 |
| CCNE1_P683_F | 0.0000 | 0.0000 | 0.0000 | 0.0000 | 0.0000 | 0.0000 | 0.0000 | 0.0000 | 0.0000 | 0.0000 | 0.0002 | 0.0000 | 0.0000 | 0.0000 | 0.0000 |
| CD1A_P414_R  | 0.0063 | 0.2752 | 0.0072 | 0.0000 | 0.3015 | 0.5808 | 0.2512 | 0.0086 | 0.0112 | 0.1608 | 0.2773 | 0.0082 | 0.0717 | 0.0050 | 0.0000 |
| CD2_P68_F    | 0.6888 | 0.0235 | 0.4415 | 0.0000 | 0.3466 | 0.1887 | 0.0117 | 0.9843 | 0.1435 | 0.0000 | 0.6157 | 0.0117 | 0.7882 | 0.4157 | 0.4675 |
| CD34_P339_R  | 0.0097 | 0.1864 | 0.3127 | 0.0000 | 0.4531 | 0.1795 | 0.2336 | 0.0193 | 0.0121 | 0.0152 | 0.2497 | 0.3792 | 0.0139 | 0.0154 | 0.0000 |
| CD34_P780_R  | 0.6205 | 0.8627 | 0.5973 | 0.0000 | 0.5675 | 0.5874 | 0.8263 | 0.8017 | 0.8551 | 0.8579 | 0.7308 | 0.7634 | 0.0538 | 0.6537 | 0.7144 |
| CD40_E58_R   | 0.0018 | 0.0036 | 0.0038 | 0.0000 | 0.0000 | 0.2201 | 0.0000 | 0.0033 | 0.0027 | 0.0000 | 0.0040 | 0.0063 | 0.0000 | 0.0021 | 0.0000 |
| CD40_P372_R  | 0.0174 | 0.0208 | 0.5351 | 0.7742 | 0.2028 | 0.1983 | 0.2281 | 0.0249 | 0.0234 | 0.1914 | 0.0211 | 0.0165 | 0.0229 | 0.0257 | 0.0017 |
| CD44_E26_F   | 0.0016 | 0.2329 | 0.0002 | 0.0000 | 0.0000 | 0.0000 | 0.0000 | 0.0000 | 0.0040 | 0.0000 | 0.0032 | 0.0000 | 0.0067 | 0.0043 | 0.0000 |
| CD44_P87_F   | 0.0000 | 0.0000 | 0.9908 | 0.0000 | 0.0047 | 0.0000 | 0.0000 | 0.0032 | 0.4341 | 0.0000 | 0.6490 | 0.0000 | 0.0000 | 0.0000 | 0.0000 |
| CD86_P3_F    | 0.0000 | 0.0000 | 0.0000 | 0.0000 | 0.0326 | 0.0000 | 0.0000 | 0.0022 | 0.0030 | 0.0000 | 0.0000 | 0.0000 | 0.0000 | 0.0000 | 0.0000 |
| CDC25B_E83_F | 0.0000 | 0.0052 | 0.0050 | 0.0000 | 0.0000 | 0.0000 | 0.0019 | 0.0000 | 0.0000 | 0.0000 | 0.0000 | 0.0023 | 0.0000 | 0.0025 | 0.0000 |
| CDC25B_P11_R | 0.3754 | 0.0460 | 0.0091 | 0.0000 | 0.3322 | 0.2992 | 0.0054 | 0.0131 | 0.0144 | 0.2915 | 0.0000 | 0.0000 | 0.0000 | 0.0150 | 0.0000 |
| CDH1_P52_R   | 0.0012 | 0.0000 | 0.0000 | 0.0000 | 0.0000 | 0.0000 | 0.0042 | 0.0000 | 0.0028 | 0.0000 | 0.0036 | 0.0009 | 0.0000 | 0.0002 | 0.0000 |
| CDH11_E102_R | 0.0096 | 0.0000 | 0.0051 | 0.0000 | 0.0020 | 0.0000 | 0.1245 | 0.0041 | 0.0046 | 0.0000 | 0.0051 | 0.0000 | 0.0000 | 0.0025 | 0.0021 |
| CDH11_P203_R | 0.0219 | 0.7011 | 0.0159 | 0.3894 | 0.5395 | 0.5171 | 0.0167 | 0.0189 | 0.0161 | 0.0216 | 0.4950 | 0.6200 | 0.0165 | 0.0149 | 0.0000 |
| CDH11_P354_R | 0.0026 | 0.0000 | 0.0000 | 0.0000 | 0.0036 | 0.0000 | 0.0051 | 0.0049 | 0.0102 | 0.0000 | 0.0033 | 0.0048 | 0.0000 | 0.0068 | 0.0000 |
| CDH13_E102_F | 0.0000 | 0.9933 | 0.0000 | 0.0000 | 0.9909 | 0.0000 | 0.9723 | 0.2387 | 0.9811 | 0.0000 | 0.9936 | 0.9877 | 0.0147 | 0.9867 | 0.9853 |
| CDH17_E31_F  | 0.0074 | 0.0084 | 0.0603 | 0.0000 | 0.1494 | 0.0000 | 0.0000 | 0.0079 | 0.0142 | 0.0000 | 0.0066 | 0.0137 | 0.0000 | 0.0137 | 0.0000 |
| CDH17_P532_F | 0.6409 | 0.6459 | 0.9910 | 0.2376 | 0.9912 | 0.7047 | 0.5448 | 0.9814 | 0.9854 | 0.9921 | 0.9900 | 0.6870 | 0.9933 | 0.9863 | 0.9775 |
| CDH3_E100_R  | 0.0144 | 0.2343 | 0.2032 | 0.0000 | 0.2158 | 0.2340 | 0.0153 | 0.0246 | 0.0176 | 0.1864 | 0.1761 | 0.0289 | 0.0264 | 0.0206 | 0.0043 |
| CDH3_P87_R   | 0.0039 | 0.0074 | 0.0000 | 0.3701 | 0.0025 | 0.0000 | 0.0000 | 0.0053 | 0.0018 | 0.0000 | 0.0033 | 0.0046 | 0.0050 | 0.0017 | 0.0000 |
| CDK10_E74_F  | 0.9876 | 0.4262 | 0.9924 | 0.1890 | 0.7398 | 0.6275 | 0.4954 | 0.9844 | 0.0513 | 0.4997 | 0.4426 | 0.0330 | 0.4761 | 0.7238 | 0.2551 |
| CDK2_P330_R  | 0.0000 | 0.0164 | 0.0000 | 0.0000 | 0.0013 | 0.9955 | 0.0044 | 0.9833 | 0.9755 | 0.0000 | 0.0563 | 0.0000 | 0.0000 | 0.0013 | 0.9823 |

|                   |        |        |        |        |        |        |        |        |        |        |        |        |        |        |        |
|-------------------|--------|--------|--------|--------|--------|--------|--------|--------|--------|--------|--------|--------|--------|--------|--------|
| CDK6_E256_F       | 0.0000 | 0.0000 | 0.0033 | 0.0000 | 0.0039 | 0.0000 | 0.0058 | 0.2953 | 0.0123 | 0.0000 | 0.0036 | 0.0077 | 0.0073 | 0.0058 | 0.0000 |
| CDK6_P291_R       | 0.0104 | 0.0100 | 0.0105 | 0.0000 | 0.6034 | 0.1950 | 0.3089 | 0.0135 | 0.0142 | 0.0162 | 0.2744 | 0.4260 | 0.0163 | 0.0182 | 0.0000 |
| CDKN1A_E101_F     | 0.0000 | 0.0000 | 0.0064 | 0.0000 | 0.0082 | 0.0000 | 0.0000 | 0.0157 | 0.0106 | 0.0000 | 0.1345 | 0.1640 | 0.0113 | 0.6638 | 0.0000 |
| CDKN1A_P242_F     | 0.0059 | 0.0082 | 0.0000 | 0.0000 | 0.0000 | 0.0037 | 0.0048 | 0.0157 | 0.0065 | 0.0000 | 0.0000 | 0.0000 | 0.0000 | 0.0000 | 0.0000 |
| CDKN1B_P1161_F    | 0.0000 | 0.0000 | 0.0000 | 0.0221 | 0.0000 | 0.0000 | 0.0000 | 0.0000 | 0.6549 | 0.0062 | 0.0000 | 0.0000 | 0.0000 | 0.0000 | 0.0000 |
| CDKN2A_E121_R     | 0.0103 | 0.0068 | 0.0067 | 0.0000 | 0.0030 | 0.1969 | 0.0051 | 0.0075 | 0.0089 | 0.0095 | 0.0127 | 0.0132 | 0.0044 | 0.1495 | 0.0000 |
| CDKN2B_E220_F     | 0.0047 | 0.9958 | 0.0000 | 0.0000 | 0.0000 | 0.0000 | 0.0000 | 0.0000 | 0.0043 | 0.0000 | 0.0000 | 0.0061 | 0.6708 | 0.0036 | 0.7406 |
| CDM_seq_21_S260_R | 0.0048 | 0.0093 | 0.2001 | 0.0000 | 0.0000 | 0.0000 | 0.0107 | 0.0067 | 0.5180 | 0.9934 | 0.0000 | 0.0010 | 0.0039 | 0.9834 | 0.2966 |
| CEACAM1_E57_R     | 0.0063 | 0.0044 | 0.4044 | 0.0000 | 0.0060 | 0.0000 | 0.0000 | 0.0057 | 0.0077 | 0.2343 | 0.0000 | 0.0033 | 0.0053 | 0.0000 | 0.0000 |
| CEACAM1_P44_R     | 0.0040 | 0.0199 | 0.1144 | 0.0000 | 0.2707 | 0.2131 | 0.0000 | 0.0093 | 0.0113 | 0.0000 | 0.0122 | 0.0091 | 0.0094 | 0.0061 | 0.0000 |
| CEBPA_P1163_R     | 0.1426 | 0.0086 | 0.2111 | 0.0000 | 0.1744 | 0.1448 | 0.1995 | 0.6659 | 0.1746 | 0.0139 | 0.0116 | 0.0128 | 0.1339 | 0.0148 | 0.0000 |
| CEBPA_P706_F      | 0.0053 | 0.0000 | 0.0000 | 0.0000 | 0.0063 | 0.0000 | 0.0000 | 0.0057 | 0.3503 | 0.0089 | 0.0051 | 0.0000 | 0.0037 | 0.9849 | 0.0000 |
| CFTR_P115_F       | 0.0016 | 0.0000 | 0.0039 | 0.0000 | 0.0025 | 0.0000 | 0.0000 | 0.0047 | 0.0063 | 0.0065 | 0.0088 | 0.0074 | 0.0052 | 0.0000 | 0.0000 |
| CHD2_P451_F       | 0.0042 | 0.0069 | 0.0000 | 0.0000 | 0.0000 | 0.0000 | 0.0000 | 0.0000 | 0.9807 | 0.0000 | 0.0055 | 0.0037 | 0.0000 | 0.0027 | 0.0000 |
| CHFR_P501_F       | 0.0053 | 0.0000 | 0.0042 | 0.0000 | 0.0007 | 0.2873 | 0.0102 | 0.0066 | 0.0076 | 0.0048 | 0.0014 | 0.0000 | 0.0000 | 0.0006 | 0.0000 |
| CHFR_P635_R       | 0.0000 | 0.8598 | 0.0000 | 0.4441 | 0.9904 | 0.3299 | 0.9908 | 0.9832 | 0.9636 | 0.0000 | 0.0000 | 0.9888 | 0.0000 | 0.9845 | 0.9813 |
| CHGA_E52_F        | 0.0074 | 0.0092 | 0.0000 | 0.1979 | 0.0040 | 0.1912 | 0.0068 | 0.0014 | 0.0027 | 0.0000 | 0.0055 | 0.0037 | 0.0066 | 0.0000 | 0.0000 |
| CHI3L2_E10_F      | 0.0149 | 0.7463 | 0.0081 | 0.0000 | 0.0049 | 0.0000 | 0.0101 | 0.4940 | 0.1304 | 0.0224 | 0.0000 | 0.0109 | 0.8274 | 0.7505 | 0.3448 |
| CLK1_P538_F       | 0.0000 | 0.0000 | 0.0000 | 0.0000 | 0.0000 | 0.0000 | 0.0038 | 0.0000 | 0.0011 | 0.0025 | 0.0046 | 0.0005 | 0.0007 | 0.0000 | 0.0000 |
| COL18A1_P365_R    | 0.0028 | 0.0606 | 0.0144 | 0.1496 | 0.1840 | 0.1035 | 0.0132 | 0.0122 | 0.0206 | 0.0118 | 0.0151 | 0.2822 | 0.1880 | 0.9694 | 0.0000 |
| COL1A1_P5_F       | 0.0000 | 0.0053 | 0.0000 | 0.0000 | 0.0000 | 0.0000 | 0.0045 | 0.0000 | 0.0000 | 0.0000 | 0.0002 | 0.0000 | 0.0000 | 0.0000 | 0.0000 |
| COL1A2_E299_F     | 0.0000 | 0.0155 | 0.5782 | 0.0000 | 0.0039 | 0.0166 | 0.0102 | 0.0047 | 0.0708 | 0.0000 | 0.0071 | 0.2948 | 0.0071 | 0.3151 | 0.3793 |
| COL1A2_P407_R     | 0.0000 | 0.0000 | 0.0000 | 0.0000 | 0.0024 | 0.0000 | 0.0087 | 0.0000 | 0.2250 | 0.0000 | 0.0000 | 0.6808 | 0.0000 | 0.0000 | 0.0000 |
| COL1A2_P48_R      | 0.1588 | 0.0284 | 0.0178 | 0.1088 | 0.0508 | 0.1941 | 0.0314 | 0.0171 | 0.0438 | 0.1868 | 0.1060 | 0.0408 | 0.0270 | 0.0670 | 0.0000 |
| COL4A3_E205_R     | 0.0000 | 0.0000 | 0.0000 | 0.0000 | 0.0000 | 0.0000 | 0.0000 | 0.0032 | 0.0000 | 0.0000 | 0.0000 | 0.0000 | 0.0000 | 0.0023 | 0.0000 |
| COL4A3_P545_F     | 0.7278 | 0.0618 | 0.0426 | 0.4754 | 0.0299 | 0.8102 | 0.7598 | 0.7943 | 0.0301 | 0.0682 | 0.0601 | 0.9187 | 0.4555 | 0.0324 | 0.0244 |
| COL6A1_P283_F     | 0.0153 | 0.0244 | 0.8433 | 0.0000 | 0.0234 | 0.0687 | 0.0087 | 0.0104 | 0.9036 | 0.1792 | 0.0194 | 0.0213 | 0.0128 | 0.0081 | 0.0000 |
| COL6A1_P425_F     | 0.1129 | 0.0000 | 0.0123 | 0.0000 | 0.3668 | 0.0061 | 0.0061 | 0.1388 | 0.1667 | 0.0142 | 0.3377 | 0.0112 | 0.3451 | 0.0113 | 0.0000 |
| COPG2_P298_F      | 0.1114 | 0.8483 | 0.0551 | 0.2374 | 0.7068 | 0.5556 | 0.5894 | 0.5259 | 0.0549 | 0.6339 | 0.1014 | 0.1169 | 0.6339 | 0.1252 | 0.0400 |
| CPA4_P1265_R      | 0.7083 | 0.6383 | 0.0432 | 0.9360 | 0.6772 | 0.8367 | 0.7094 | 0.0334 | 0.0678 | 0.6804 | 0.6578 | 0.0666 | 0.0330 | 0.0642 | 0.0063 |
| CREB1_P819_F      | 0.0083 | 0.0000 | 0.0000 | 0.0000 | 0.0654 | 0.0404 | 0.0057 | 0.0109 | 0.0106 | 0.0000 | 0.0020 | 0.0117 | 0.0065 | 0.0047 | 0.0000 |
| CRIP1_P874_R      | 0.3798 | 0.4536 | 0.0087 | 0.6652 | 0.0072 | 0.0058 | 0.3733 | 0.0199 | 0.0111 | 0.0133 | 0.0107 | 0.0125 | 0.4644 | 0.0213 | 0.0000 |
| CRK_P721_F        | 0.0054 | 0.0061 | 0.0781 | 0.0000 | 0.0025 | 0.0045 | 0.0063 | 0.0052 | 0.0217 | 0.0067 | 0.0049 | 0.0080 | 0.0047 | 0.0042 | 0.0000 |

|               |        |        |        |        |        |        |        |        |        |        |        |        |        |        |        |
|---------------|--------|--------|--------|--------|--------|--------|--------|--------|--------|--------|--------|--------|--------|--------|--------|
| CSF1_P217_F   | 0.0086 | 0.0686 | 0.0092 | 0.0000 | 0.2477 | 0.1418 | 0.1373 | 0.5584 | 0.0260 | 0.0182 | 0.1386 | 0.2266 | 0.9615 | 0.0338 | 0.0000 |
| CSF1_P339_F   | 0.0000 | 0.0000 | 0.0000 | 0.0000 | 0.0000 | 0.0000 | 0.0000 | 0.0038 | 0.0000 | 0.0000 | 0.0000 | 0.0000 | 0.0000 | 0.0000 | 0.0000 |
| CSF1R_E26_F   | 0.1516 | 0.0000 | 0.0070 | 0.2255 | 0.0018 | 0.0103 | 0.0000 | 0.0076 | 0.0040 | 0.0000 | 0.0043 | 0.0000 | 0.0039 | 0.0000 | 0.0000 |
| CSF3R_P472_F  | 0.0330 | 0.1494 | 0.1790 | 0.0000 | 0.1885 | 0.1900 | 0.1249 | 0.0359 | 0.0357 | 0.1891 | 0.1619 | 0.0588 | 0.0280 | 0.0154 | 0.0120 |
| CSPG2_E38_F   | 0.0544 | 0.0059 | 0.0050 | 0.0000 | 0.0019 | 0.0000 | 0.0000 | 0.0066 | 0.0068 | 0.0000 | 0.0064 | 0.0067 | 0.0043 | 0.0040 | 0.0000 |
| CSPG2_P82_R   | 0.0058 | 0.0000 | 0.0000 | 0.0000 | 0.0000 | 0.0000 | 0.0000 | 0.0099 | 0.0068 | 0.0087 | 0.0070 | 0.0000 | 0.0000 | 0.0016 | 0.0000 |
| CSTB_E410_F   | 0.0000 | 0.0000 | 0.0000 | 0.0000 | 0.0061 | 0.0000 | 0.0000 | 0.0047 | 0.0107 | 0.0000 | 0.1387 | 0.0000 | 0.9255 | 0.8925 | 0.5441 |
| CTAG1B_P4_R   | 0.0085 | 0.0056 | 0.0032 | 0.0000 | 0.0000 | 0.0053 | 0.0067 | 0.0000 | 0.0000 | 0.0000 | 0.0000 | 0.0256 | 0.0019 | 0.0000 | 0.0000 |
| CTAG1B_P77_F  | 0.0201 | 0.3542 | 0.6210 | 0.9022 | 0.9313 | 0.4445 | 0.3051 | 0.9327 | 0.0628 | 0.0223 | 0.2359 | 0.9052 | 0.0227 | 0.0570 | 0.2597 |
| CTAG2_P1426_F | 0.6148 | 0.0224 | 0.6182 | 0.6932 | 0.0148 | 0.8132 | 0.6637 | 0.0199 | 0.0151 | 0.7295 | 0.2448 | 0.0231 | 0.0104 | 0.0274 | 0.0000 |
| CTGF_E156_F   | 0.0029 | 0.0030 | 0.0000 | 0.0000 | 0.0012 | 0.0000 | 0.0000 | 0.0000 | 0.0033 | 0.0000 | 0.0000 | 0.0065 | 0.0008 | 0.0000 | 0.0000 |
| CTLA4_P1128_F | 0.6553 | 0.2780 | 0.7854 | 0.9954 | 0.9923 | 0.9823 | 0.1694 | 0.8176 | 0.1861 | 0.4384 | 0.8582 | 0.8592 | 0.9863 | 0.8271 | 0.4305 |
| CTNNA1_P185_R | 0.0039 | 0.0023 | 0.0037 | 0.0000 | 0.0044 | 0.0059 | 0.4801 | 0.0014 | 0.0061 | 0.0000 | 0.0038 | 0.0055 | 0.0050 | 0.0029 | 0.0000 |
| CTNNA1_P382_R | 0.0064 | 0.1801 | 0.0000 | 0.3374 | 0.0055 | 0.9958 | 0.0065 | 0.0074 | 0.0078 | 0.9175 | 0.0068 | 0.0079 | 0.0044 | 0.0040 | 0.0000 |
| CTNNB1_P757_F | 0.0073 | 0.0556 | 0.0141 | 0.5398 | 0.0043 | 0.0520 | 0.1022 | 0.0158 | 0.0129 | 0.0648 | 0.0280 | 0.0179 | 0.0559 | 0.0656 | 0.0000 |
| CTSD_P726_F   | 0.0000 | 0.0000 | 0.0000 | 0.0000 | 0.0000 | 0.0061 | 0.0000 | 0.0000 | 0.0000 | 0.0000 | 0.0000 | 0.0000 | 0.0000 | 0.0000 | 0.0000 |
| CTSH_P238_F   | 0.0023 | 0.0000 | 0.0000 | 0.0000 | 0.0000 | 0.0000 | 0.0000 | 0.0000 | 0.0000 | 0.0000 | 0.0000 | 0.0000 | 0.0000 | 0.0000 | 0.0000 |
| CTSL_P264_R   | 0.0123 | 0.0166 | 0.0039 | 0.0000 | 0.0041 | 0.0000 | 0.0052 | 0.0115 | 0.0060 | 0.0000 | 0.0000 | 0.1491 | 0.0000 | 0.0008 | 0.0000 |
| CTSL_P81_F    | 0.0000 | 0.0036 | 0.0080 | 0.3660 | 0.0059 | 0.0000 | 0.0000 | 0.0078 | 0.0050 | 0.0097 | 0.0042 | 0.0075 | 0.0044 | 0.0019 | 0.0000 |
| CTTN_E29_R    | 0.0055 | 0.0100 | 0.0000 | 0.0000 | 0.0000 | 0.0000 | 0.0000 | 0.0000 | 0.0126 | 0.0000 | 0.0000 | 0.0000 | 0.0050 | 0.0023 | 0.0000 |
| CYP1A1_P382_F | 0.0112 | 0.1453 | 0.5968 | 0.5110 | 0.0287 | 0.6112 | 0.4506 | 0.4837 | 0.0427 | 0.1814 | 0.4273 | 0.3859 | 0.0366 | 0.5301 | 0.0000 |
| CYP2E1_P416_F | 0.0000 | 0.0142 | 0.0750 | 0.0000 | 0.2702 | 0.0372 | 0.0079 | 0.0083 | 0.0593 | 0.0804 | 0.0028 | 0.0000 | 0.0861 | 0.2492 | 0.0000 |
| DAB2_P35_F    | 0.0000 | 0.0159 | 0.0000 | 0.0000 | 0.0024 | 0.0000 | 0.0000 | 0.0000 | 0.0000 | 0.0000 | 0.0044 | 0.0004 | 0.0000 | 0.0000 | 0.0000 |
| DAB2_P468_F   | 0.4037 | 0.1391 | 0.0265 | 0.0000 | 0.6907 | 0.0652 | 0.1664 | 0.0238 | 0.0550 | 0.0164 | 0.2336 | 0.0235 | 0.2378 | 0.0207 | 0.0082 |
| DAB2IP_P9_F   | 0.0000 | 0.0000 | 0.0021 | 0.1666 | 0.0000 | 0.0000 | 0.0000 | 0.0000 | 0.0000 | 0.0000 | 0.0000 | 0.0000 | 0.0000 | 0.0000 | 0.0000 |
| DAPK1_P10_F   | 0.0000 | 0.0000 | 0.0000 | 0.0000 | 0.0018 | 0.0000 | 0.0000 | 0.0000 | 0.0033 | 0.0045 | 0.0000 | 0.0000 | 0.0036 | 0.0005 | 0.9739 |
| DAPK1_P345_R  | 0.0023 | 0.0000 | 0.0000 | 0.0000 | 0.0013 | 0.0000 | 0.0010 | 0.0000 | 0.7213 | 0.0000 | 0.0000 | 0.0000 | 0.0000 | 0.0000 | 0.0000 |
| DBC1_P351_R   | 0.0000 | 0.0000 | 0.0000 | 0.0000 | 0.0009 | 0.0000 | 0.0000 | 0.0000 | 0.0000 | 0.0000 | 0.0033 | 0.0000 | 0.0046 | 0.0000 | 0.0000 |
| DCC_P177_F    | 0.2592 | 0.4483 | 0.0532 | 0.7515 | 0.0133 | 0.5231 | 0.0199 | 0.3373 | 0.0136 | 0.0108 | 0.1647 | 0.0065 | 0.0082 | 0.4921 | 0.0000 |
| DCC_P471_R    | 0.0126 | 0.2467 | 0.3388 | 0.1612 | 0.6404 | 0.0048 | 0.0094 | 0.0127 | 0.0112 | 0.0117 | 0.0121 | 0.0112 | 0.0149 | 0.0183 | 0.0000 |
| DCN_P1320_R   | 0.0000 | 0.0000 | 0.0096 | 0.0000 | 0.0000 | 0.0000 | 0.0000 | 0.0038 | 0.0000 | 0.0000 | 0.0000 | 0.0000 | 0.0000 | 0.0000 | 0.0000 |
| DDB2_P407_F   | 0.0000 | 0.0000 | 0.0000 | 0.0000 | 0.0011 | 0.0037 | 0.0000 | 0.0059 | 0.4952 | 0.0000 | 0.0036 | 0.0011 | 0.0000 | 0.9731 | 0.0000 |
| DDB2_P613_R   | 0.0000 | 0.0104 | 0.0076 | 0.1445 | 0.2888 | 0.4339 | 0.2935 | 0.0091 | 0.0058 | 0.0087 | 0.1261 | 0.0073 | 0.1243 | 0.0050 | 0.0000 |

|                     |        |        |        |        |        |        |        |        |        |        |        |        |        |        |        |
|---------------------|--------|--------|--------|--------|--------|--------|--------|--------|--------|--------|--------|--------|--------|--------|--------|
| DDR1_E23_R          | 0.0042 | 0.0072 | 0.0000 | 0.0000 | 0.0032 | 0.0000 | 0.0081 | 0.0085 | 0.0256 | 0.0095 | 0.0000 | 0.0056 | 0.0063 | 0.0126 | 0.0000 |
| DDR2_E331_F         | 0.0000 | 0.0000 | 0.0065 | 0.0000 | 0.9869 | 0.0687 | 0.0000 | 0.9797 | 0.9781 | 0.6980 | 0.0204 | 0.0764 | 0.9941 | 0.9824 | 0.9610 |
| DES_E228_R          | 0.0000 | 0.0000 | 0.0000 | 0.0000 | 0.0000 | 0.0000 | 0.0000 | 0.0149 | 0.0106 | 0.0000 | 0.0000 | 0.0000 | 0.0000 | 0.0000 | 0.0000 |
| DHCR24_P406_R       | 0.0138 | 0.0123 | 0.0074 | 0.0000 | 0.3734 | 0.0377 | 0.0536 | 0.0440 | 0.2249 | 0.0399 | 0.9252 | 0.0111 | 0.1070 | 0.9731 | 0.3549 |
| DIO3_E230_R         | 0.0088 | 0.0000 | 0.0072 | 0.0000 | 0.0067 | 0.0000 | 0.0080 | 0.0047 | 0.0093 | 0.0000 | 0.0000 | 0.0000 | 0.0054 | 0.0094 | 0.0000 |
| DIO3_P674_F         | 0.1538 | 0.1399 | 0.0163 | 0.1808 | 0.4550 | 0.3166 | 0.1214 | 0.0108 | 0.0144 | 0.0166 | 0.3174 | 0.3393 | 0.1757 | 0.0755 | 0.0000 |
| DIRAS3_E55_R        | 0.0156 | 0.0218 | 0.0150 | 0.0000 | 0.0092 | 0.3222 | 0.1118 | 0.0209 | 0.0288 | 0.0181 | 0.0177 | 0.0000 | 0.0221 | 0.0000 | 0.0106 |
| DKC1_E101_F         | 0.0000 | 0.0089 | 0.0000 | 0.0000 | 0.0000 | 0.0000 | 0.0000 | 0.0000 | 0.0000 | 0.0025 | 0.0000 | 0.0000 | 0.0000 | 0.0000 | 0.0000 |
| DKFZP564O0823_E45_F | 0.0000 | 0.0000 | 0.0000 | 0.0000 | 0.0041 | 0.0018 | 0.0080 | 0.0101 | 0.0007 | 0.0000 | 0.0000 | 0.0000 | 0.0026 | 0.0022 | 0.0000 |
| DLC1_P88_R          | 0.0000 | 0.0000 | 0.0000 | 0.0000 | 0.0000 | 0.0040 | 0.0000 | 0.4705 | 0.0003 | 0.0000 | 0.0000 | 0.0000 | 0.0000 | 0.0014 | 0.2197 |
| DLK1_E227_R         | 0.9452 | 0.9977 | 0.9856 | 0.7537 | 0.9965 | 0.9980 | 0.9978 | 0.9950 | 0.9940 | 0.9679 | 0.9961 | 0.9728 | 0.9966 | 0.9953 | 0.9882 |
| DLL1_P386_F         | 0.0000 | 0.0021 | 0.9896 | 0.0000 | 0.0000 | 0.9939 | 0.0000 | 0.9813 | 0.9094 | 0.0000 | 0.0000 | 0.9830 | 0.0000 | 0.0000 | 0.9743 |
| DLL1_P832_F         | 0.0043 | 0.0000 | 0.0076 | 0.0000 | 0.1679 | 0.2454 | 0.9944 | 0.0000 | 0.2856 | 0.9950 | 0.0000 | 0.0000 | 0.0000 | 0.0109 | 0.0000 |
| DMP1_P134_F         | 0.0095 | 0.0120 | 0.6210 | 0.0000 | 0.9910 | 0.1839 | 0.2196 | 0.0135 | 0.1521 | 0.0123 | 0.0128 | 0.0192 | 0.0128 | 0.0158 | 0.0195 |
| DNAJC15_E26_R       | 0.0000 | 0.0438 | 0.0039 | 0.0000 | 0.0041 | 0.0000 | 0.0000 | 0.0432 | 0.0105 | 0.0065 | 0.0068 | 0.0073 | 0.0062 | 0.0054 | 0.0000 |
| DNASE1L1_P108_F     | 0.5511 | 0.5129 | 0.7760 | 0.4522 | 0.0147 | 0.6387 | 0.0247 | 0.9864 | 0.6923 | 0.6265 | 0.5269 | 0.8506 | 0.9097 | 0.0217 | 0.8673 |
| DNMT1_P100_R        | 0.9873 | 0.4359 | 0.9909 | 0.0000 | 0.2920 | 0.0689 | 0.2634 | 0.9873 | 0.9818 | 0.4569 | 0.4668 | 0.9915 | 0.9924 | 0.9785 | 0.9893 |
| DSC2_E90_F          | 0.0000 | 0.0000 | 0.9751 | 0.0000 | 0.0000 | 0.0000 | 0.0000 | 0.0000 | 0.8907 | 0.0000 | 0.0000 | 0.9597 | 0.9729 | 0.0000 | 0.9579 |
| DSP_P440_R          | 0.3897 | 0.4034 | 0.5942 | 0.4274 | 0.0188 | 0.5591 | 0.4631 | 0.9810 | 0.9847 | 0.5253 | 0.9911 | 0.6554 | 0.9890 | 0.9673 | 0.9008 |
| DST_E31_F           | 0.0114 | 0.0371 | 0.8344 | 0.0000 | 0.8270 | 0.0053 | 0.0316 | 0.9773 | 0.5648 | 0.8446 | 0.7867 | 0.9917 | 0.0382 | 0.9839 | 0.3769 |
| DST_P262_R          | 0.0273 | 0.5627 | 0.0895 | 0.9452 | 0.0253 | 0.0158 | 0.4958 | 0.8470 | 0.0663 | 0.5151 | 0.5243 | 0.0696 | 0.0806 | 0.7351 | 0.0823 |
| DUSP4_E61_F         | 0.0123 | 0.0000 | 0.0065 | 0.0000 | 0.0063 | 0.0000 | 0.0000 | 0.0073 | 0.0066 | 0.0095 | 0.0104 | 0.0084 | 0.0057 | 0.0081 | 0.0000 |
| DUSP4_P925_R        | 0.1761 | 0.9938 | 0.0226 | 0.0000 | 0.0202 | 0.6242 | 0.0123 | 0.0241 | 0.0257 | 0.3231 | 0.0352 | 0.4529 | 0.6464 | 0.0184 | 0.4208 |
| E2F3_P840_R         | 0.0017 | 0.0061 | 0.0015 | 0.0000 | 0.0000 | 0.0000 | 0.0058 | 0.6006 | 0.0072 | 0.9930 | 0.0000 | 0.9731 | 0.0192 | 0.0030 | 0.4642 |
| E2F5_P516_R         | 0.9766 | 0.0000 | 0.9693 | 0.0000 | 0.9662 | 0.0000 | 0.0000 | 0.9412 | 0.9394 | 0.9814 | 0.9773 | 0.0720 | 0.0880 | 0.6237 | 0.9551 |
| EDN1_E50_R          | 0.5860 | 0.9887 | 0.9847 | 0.9462 | 0.3009 | 0.3680 | 0.9820 | 0.5877 | 0.2980 | 0.9731 | 0.3976 | 0.9881 | 0.6461 | 0.4955 | 0.4371 |
| EDN1_P39_R          | 0.4554 | 0.9359 | 0.9336 | 0.9730 | 0.5791 | 0.1909 | 0.9328 | 0.5274 | 0.1157 | 0.9907 | 0.0300 | 0.6673 | 0.9609 | 0.0058 | 0.5615 |
| EDNRB_P148_R        | 0.0000 | 0.0000 | 0.0033 | 0.0000 | 0.9927 | 0.0000 | 0.0000 | 0.1044 | 0.8041 | 0.9930 | 0.0000 | 0.0042 | 0.0000 | 0.9780 | 0.0000 |
| EFNA1_P591_R        | 0.0434 | 0.0324 | 0.1006 | 0.8272 | 0.1021 | 0.2410 | 0.2398 | 0.0119 | 0.0060 | 0.0124 | 0.0000 | 0.0283 | 0.0343 | 0.0000 | 0.8335 |
| EFNA1_P7_F          | 0.9791 | 0.0000 | 0.0000 | 0.0000 | 0.0000 | 0.0000 | 0.0000 | 0.2364 | 0.0027 | 0.0028 | 0.0000 | 0.0031 | 0.0000 | 0.9683 | 0.8480 |
| EFNB1_E69_F         | 0.9923 | 0.0047 | 0.2033 | 0.0000 | 0.0062 | 0.0000 | 0.0105 | 0.0087 | 0.0088 | 0.0000 | 0.0000 | 0.0000 | 0.0918 | 0.0064 | 0.2631 |
| EFNB3_P442_R        | 0.0000 | 0.0000 | 0.0077 | 0.0000 | 0.0000 | 0.0000 | 0.0000 | 0.0086 | 0.0089 | 0.0017 | 0.0000 | 0.0020 | 0.0056 | 0.0057 | 0.0000 |
| EGF_E339_F          | 0.0000 | 0.0067 | 0.0000 | 0.0000 | 0.0045 | 0.0000 | 0.0055 | 0.5914 | 0.3758 | 0.0000 | 0.0000 | 0.8432 | 0.0000 | 0.0000 | 0.8169 |

|                |        |        |        |        |        |        |        |        |        |        |        |        |        |        |        |
|----------------|--------|--------|--------|--------|--------|--------|--------|--------|--------|--------|--------|--------|--------|--------|--------|
| EGFR_E295_R    | 0.0068 | 0.0875 | 0.0063 | 0.0045 | 0.0073 | 0.0000 | 0.0153 | 0.0100 | 0.0097 | 0.7306 | 0.0070 | 0.0709 | 0.0056 | 0.0027 | 0.0000 |
| EGFR_P260_R    | 0.0000 | 0.0000 | 0.0000 | 0.0000 | 0.0000 | 0.0000 | 0.0000 | 0.9799 | 0.0000 | 0.0000 | 0.0000 | 0.0022 | 0.0000 | 0.0000 | 0.7373 |
| EGR4_P479_F    | 0.0185 | 0.9944 | 0.8808 | 0.4553 | 0.1281 | 0.6857 | 0.3499 | 0.9852 | 0.9861 | 0.0212 | 0.9894 | 0.9824 | 0.9835 | 0.8829 | 0.8343 |
| EIF2AK2_E103_R | 0.9904 | 0.9948 | 0.0000 | 0.0000 | 0.9913 | 0.0000 | 0.0000 | 0.9803 | 0.9779 | 0.0000 | 0.0000 | 0.0000 | 0.0000 | 0.0000 | 0.9716 |
| EIF2AK2_P313_F | 0.9943 | 0.0319 | 0.9931 | 0.0000 | 0.9927 | 0.0032 | 0.0103 | 0.9880 | 0.9854 | 0.9943 | 0.9921 | 0.1563 | 0.0321 | 0.9828 | 0.9873 |
| ELK1_E156_F    | 0.0000 | 0.0000 | 0.0000 | 0.0000 | 0.0000 | 0.0000 | 0.0000 | 0.9780 | 0.9751 | 0.0000 | 0.9904 | 0.9878 | 0.0000 | 0.0000 | 0.9042 |
| EMR3_P39_R     | 0.7952 | 0.4514 | 0.0139 | 0.2599 | 0.9930 | 0.5683 | 0.3180 | 0.9824 | 0.7703 | 0.0120 | 0.0234 | 0.0141 | 0.4408 | 0.0286 | 0.6473 |
| ENC1_P484_R    | 0.9913 | 0.9943 | 0.9916 | 0.0000 | 0.9877 | 0.0000 | 0.3266 | 0.9879 | 0.9821 | 0.7758 | 0.0078 | 0.9931 | 0.2006 | 0.9865 | 0.9731 |
| EPHA1_E46_R    | 0.0392 | 0.0550 | 0.0250 | 0.0648 | 0.0189 | 0.2227 | 0.1860 | 0.0236 | 0.6130 | 0.0548 | 0.0182 | 0.4373 | 0.0325 | 0.7795 | 0.6034 |
| EPHA1_P119_R   | 0.0080 | 0.0081 | 0.0059 | 0.0000 | 0.0041 | 0.0000 | 0.0000 | 0.0056 | 0.0080 | 0.0124 | 0.0000 | 0.0072 | 0.0071 | 0.0046 | 0.0000 |
| EPHA2_P203_F   | 0.0053 | 0.0062 | 0.9915 | 0.0000 | 0.5865 | 0.0000 | 0.0058 | 0.0051 | 0.5255 | 0.0077 | 0.0000 | 0.0953 | 0.0041 | 0.4702 | 0.0000 |
| EPHA3_E156_R   | 0.0000 | 0.0000 | 0.0000 | 0.0000 | 0.0005 | 0.9956 | 0.0026 | 0.0004 | 0.0016 | 0.0000 | 0.0017 | 0.0000 | 0.0000 | 0.4373 | 0.0000 |
| EPHA7_E6_F     | 0.4303 | 0.0030 | 0.9943 | 0.0000 | 0.3271 | 0.0000 | 0.0430 | 0.5241 | 0.4365 | 0.0000 | 0.4795 | 0.8410 | 0.0047 | 0.0119 | 0.0505 |
| EPHA7_P205_R   | 0.9860 | 0.9942 | 0.3448 | 0.0000 | 0.9947 | 0.1667 | 0.1057 | 0.9854 | 0.9888 | 0.0467 | 0.8256 | 0.9619 | 0.9952 | 0.9861 | 0.9479 |
| EPHA8_P256_F   | 0.0197 | 0.0125 | 0.0139 | 0.0000 | 0.1423 | 0.1531 | 0.0578 | 0.0280 | 0.0194 | 0.0165 | 0.1628 | 0.0237 | 0.0237 | 0.0183 | 0.0008 |
| EPHB1_P503_F   | 0.0758 | 0.0035 | 0.0073 | 0.0000 | 0.0044 | 0.0000 | 0.0066 | 0.0105 | 0.2587 | 0.0120 | 0.0076 | 0.0293 | 0.5867 | 0.0061 | 0.1226 |
| EPHB2_E297_F   | 0.8016 | 0.8466 | 0.7460 | 0.3511 | 0.7019 | 0.8835 | 0.7904 | 0.0358 | 0.1084 | 0.7897 | 0.7794 | 0.1031 | 0.0792 | 0.0348 | 0.0000 |
| EPHB2_P165_R   | 0.0000 | 0.0000 | 0.0000 | 0.4363 | 0.0000 | 0.0000 | 0.0000 | 0.2177 | 0.9530 | 0.0101 | 0.0000 | 0.0000 | 0.0000 | 0.0000 | 0.9607 |
| EPHB3_E0_F     | 0.0000 | 0.0051 | 0.0000 | 0.0000 | 0.0000 | 0.0000 | 0.0000 | 0.0000 | 0.0000 | 0.0000 | 0.8677 | 0.0000 | 0.0000 | 0.0019 | 0.0000 |
| EPHB3_P569_R   | 0.1966 | 0.0769 | 0.3500 | 0.0729 | 0.3638 | 0.0000 | 0.2838 | 0.0601 | 0.4161 | 0.0125 | 0.3757 | 0.0105 | 0.0104 | 0.0602 | 0.0000 |
| EPHB4_P313_R   | 0.0499 | 0.5534 | 0.5818 | 0.0000 | 0.0488 | 0.0000 | 0.0119 | 0.0386 | 0.0427 | 0.0029 | 0.0541 | 0.0389 | 0.5108 | 0.0226 | 0.3318 |
| EPHB6_E342_F   | 0.7768 | 0.7992 | 0.1424 | 0.1295 | 0.5908 | 0.0000 | 0.8702 | 0.1025 | 0.1358 | 0.0000 | 0.0102 | 0.7571 | 0.2705 | 0.6913 | 0.0000 |
| EPHB6_P827_R   | 0.0000 | 0.0068 | 0.0006 | 0.0000 | 0.0000 | 0.0000 | 0.0000 | 0.0024 | 0.0008 | 0.0000 | 0.0041 | 0.0075 | 0.0000 | 0.0016 | 0.0000 |
| EPHX1_P1358_R  | 0.0000 | 0.0276 | 0.0000 | 0.0000 | 0.9920 | 0.9894 | 0.0000 | 0.0000 | 0.9843 | 0.9937 | 0.0000 | 0.4306 | 0.9887 | 0.9786 | 0.9867 |
| EPM2A_P113_F   | 0.8499 | 0.8588 | 0.8206 | 0.9811 | 0.7624 | 0.9266 | 0.4495 | 0.0644 | 0.6812 | 0.8468 | 0.0647 | 0.9923 | 0.7810 | 0.2064 | 0.3668 |
| EPM2A_P64_R    | 0.0346 | 0.4943 | 0.0160 | 0.1172 | 0.5975 | 0.5153 | 0.3591 | 0.5114 | 0.5542 | 0.0199 | 0.0150 | 0.0210 | 0.0187 | 0.0155 | 0.0000 |
| EPO_E244_R     | 0.0000 | 0.0000 | 0.0000 | 0.0000 | 0.0002 | 0.0000 | 0.0000 | 0.5450 | 0.0000 | 0.0000 | 0.0005 | 0.0000 | 0.9876 | 0.7294 | 0.0000 |
| EPO_P162_R     | 0.0000 | 0.0000 | 0.0000 | 0.3626 | 0.0000 | 0.0000 | 0.0000 | 0.0000 | 0.5175 | 0.0000 | 0.0021 | 0.0000 | 0.0000 | 0.0000 | 0.0000 |
| EPS8_E231_F    | 0.2320 | 0.0000 | 0.0172 | 0.5810 | 0.9874 | 0.9966 | 0.0000 | 0.9831 | 0.0094 | 0.9948 | 0.1096 | 0.3795 | 0.0292 | 0.0072 | 0.9771 |
| EPS8_P437_F    | 0.0000 | 0.0000 | 0.0000 | 0.4778 | 0.0018 | 0.0000 | 0.0000 | 0.0000 | 0.0000 | 0.0000 | 0.0000 | 0.0000 | 0.0025 | 0.0000 | 0.6776 |
| ERBB2_P59_R    | 0.9816 | 0.0000 | 0.9925 | 0.0000 | 0.9886 | 0.0000 | 0.0515 | 0.9217 | 0.8764 | 0.0000 | 0.0000 | 0.0000 | 0.8171 | 0.9835 | 0.4557 |
| ERBB3_E331_F   | 0.5455 | 0.4916 | 0.0337 | 0.7079 | 0.6169 | 0.8428 | 0.5771 | 0.5111 | 0.5400 | 0.5339 | 0.5178 | 0.7008 | 0.4905 | 0.4697 | 0.0000 |
| ERBB3_P870_R   | 0.1953 | 0.2108 | 0.0045 | 0.0000 | 0.1886 | 0.2549 | 0.0081 | 0.0056 | 0.0062 | 0.0070 | 0.0091 | 0.0416 | 0.0078 | 0.0115 | 0.0000 |



|               |        |        |        |        |        |        |        |        |        |        |        |        |        |        |        |
|---------------|--------|--------|--------|--------|--------|--------|--------|--------|--------|--------|--------|--------|--------|--------|--------|
| ERBB4_P255_F  | 0.3843 | 0.0059 | 0.0104 | 0.0000 | 0.0087 | 0.5297 | 0.2762 | 0.0166 | 0.6358 | 0.1023 | 0.0091 | 0.0092 | 0.0195 | 0.0178 | 0.0000 |
| ERBB4_P541_F  | 0.0000 | 0.0323 | 0.1762 | 0.0000 | 0.0394 | 0.0000 | 0.0000 | 0.9806 | 0.9665 | 0.0234 | 0.2530 | 0.0266 | 0.9078 | 0.7539 | 0.5498 |
| ERCC1_P354_F  | 0.7676 | 0.9935 | 0.0058 | 0.0000 | 0.4669 | 0.0000 | 0.9931 | 0.8745 | 0.9326 | 0.8268 | 0.7050 | 0.0044 | 0.0000 | 0.4644 | 0.7164 |
| ERCC3_P1210_R | 0.9941 | 0.2926 | 0.9364 | 0.8081 | 0.5642 | 0.2318 | 0.3786 | 0.0144 | 0.0194 | 0.2533 | 0.2633 | 0.9869 | 0.2849 | 0.6338 | 0.8631 |
| ERG_E28_F     | 0.0381 | 0.3186 | 0.7033 | 0.6346 | 0.6473 | 0.9961 | 0.0184 | 0.3633 | 0.5276 | 0.5496 | 0.0299 | 0.0328 | 0.4102 | 0.4882 | 0.2288 |
| ERN1_P809_R   | 0.0000 | 0.2403 | 0.0057 | 0.0000 | 0.9888 | 0.9960 | 0.9740 | 0.0857 | 0.9763 | 0.3531 | 0.2187 | 0.9870 | 0.9905 | 0.0000 | 0.9803 |
| ESR1_E298_R   | 0.9925 | 0.7816 | 0.7735 | 0.9482 | 0.7250 | 0.8697 | 0.6828 | 0.8340 | 0.0484 | 0.7419 | 0.0278 | 0.8042 | 0.9907 | 0.9880 | 0.9805 |
| ESR1_P151_R   | 0.0079 | 0.1844 | 0.9907 | 0.0000 | 0.0912 | 0.1847 | 0.0565 | 0.1081 | 0.0806 | 0.9937 | 0.6156 | 0.0052 | 0.0036 | 0.8078 | 0.0000 |
| ESR2_E66_F    | 0.1006 | 0.4379 | 0.3876 | 0.1345 | 0.5237 | 0.4226 | 0.9684 | 0.3355 | 0.0416 | 0.3934 | 0.3723 | 0.6658 | 0.6397 | 0.0367 | 0.0441 |
| ESR2_P162_F   | 0.2788 | 0.0203 | 0.0211 | 0.0966 | 0.6729 | 0.2963 | 0.2837 | 0.9779 | 0.0194 | 0.0419 | 0.0276 | 0.0343 | 0.0221 | 0.9880 | 0.0058 |
| ETS1_E253_R   | 0.0276 | 0.0960 | 0.0176 | 0.0092 | 0.1841 | 0.1121 | 0.1106 | 0.1466 | 0.0546 | 0.1135 | 0.0198 | 0.0243 | 0.0226 | 0.7991 | 0.0000 |
| ETS1_P559_R   | 0.0000 | 0.9953 | 0.0407 | 0.0319 | 0.9923 | 0.0000 | 0.0000 | 0.9875 | 0.9826 | 0.0000 | 0.9915 | 0.9887 | 0.9901 | 0.9866 | 0.9871 |
| ETS2_P684_F   | 0.0150 | 0.5634 | 0.0127 | 0.8898 | 0.0114 | 0.5936 | 0.9941 | 0.3712 | 0.7394 | 0.9940 | 0.0750 | 0.6709 | 0.5331 | 0.9661 | 0.7996 |
| ETS2_P835_F   | 0.0000 | 0.0000 | 0.2909 | 0.0000 | 0.4037 | 0.4835 | 0.0000 | 0.0076 | 0.1201 | 0.3161 | 0.2201 | 0.0000 | 0.0013 | 0.2543 | 0.0000 |
| ETV1_P235_F   | 0.9918 | 0.0000 | 0.9867 | 0.0000 | 0.9837 | 0.7273 | 0.9915 | 0.9876 | 0.9619 | 0.0000 | 0.2647 | 0.0788 | 0.0000 | 0.9864 | 0.9473 |
| ETV1_P515_F   | 0.0036 | 0.0000 | 0.0000 | 0.0000 | 0.0000 | 0.0000 | 0.0000 | 0.1894 | 0.0248 | 0.1106 | 0.0103 | 0.0004 | 0.5734 | 0.0000 | 0.0000 |
| ETV6_E430_F   | 0.6618 | 0.7013 | 0.0091 | 0.0000 | 0.0056 | 0.0084 | 0.0104 | 0.6031 | 0.1127 | 0.0141 | 0.9208 | 0.9384 | 0.1394 | 0.0089 | 0.2079 |
| EVI1_E47_R    | 0.9904 | 0.1033 | 0.3931 | 0.0527 | 0.6687 | 0.2887 | 0.5783 | 0.8899 | 0.1508 | 0.0193 | 0.0278 | 0.5627 | 0.5656 | 0.9561 | 0.9742 |
| EVI1_P30_R    | 0.0000 | 0.0000 | 0.0000 | 0.0000 | 0.0025 | 0.0000 | 0.0000 | 0.0000 | 0.3559 | 0.0093 | 0.0031 | 0.0092 | 0.0085 | 0.0021 | 0.0000 |
| EVI2A_P94_R   | 0.7760 | 0.0083 | 0.0045 | 0.0000 | 0.0051 | 0.0000 | 0.9938 | 0.0153 | 0.0138 | 0.0000 | 0.0049 | 0.0093 | 0.9875 | 0.0031 | 0.0000 |
| EXT1_E197_F   | 0.4031 | 0.4272 | 0.5182 | 0.6455 | 0.5442 | 0.4151 | 0.4493 | 0.0168 | 0.5661 | 0.2675 | 0.0207 | 0.0201 | 0.3069 | 0.0281 | 0.4675 |
| EYA4_E277_F   | 0.0334 | 0.0001 | 0.1939 | 0.0000 | 0.0019 | 0.0047 | 0.9938 | 0.0052 | 0.2538 | 0.0037 | 0.0061 | 0.5584 | 0.1261 | 0.0091 | 0.0000 |
| EYA4_P508_F   | 0.0000 | 0.0000 | 0.0028 | 0.0000 | 0.0000 | 0.0000 | 0.0000 | 0.0000 | 0.3235 | 0.4865 | 0.0000 | 0.9790 | 0.0000 | 0.4593 | 0.6757 |
| EYA4_P794_F   | 0.9931 | 0.9944 | 0.5834 | 0.0000 | 0.0000 | 0.0000 | 0.0000 | 0.0002 | 0.0000 | 0.0050 | 0.0000 | 0.0091 | 0.5378 | 0.9796 | 0.9757 |
| F2R_P839_F    | 0.0000 | 0.0000 | 0.3288 | 0.0000 | 0.9907 | 0.0050 | 0.9944 | 0.9886 | 0.9777 | 0.0000 | 0.9908 | 0.1629 | 0.0000 | 0.0018 | 0.8818 |
| F2R_P88_F     | 0.0034 | 0.0000 | 0.0000 | 0.0000 | 0.6624 | 0.2017 | 0.0034 | 0.3379 | 0.8146 | 0.0000 | 0.0069 | 0.0124 | 0.0038 | 0.0001 | 0.7033 |
| FABP3_E113_F  | 0.0055 | 0.8679 | 0.0129 | 0.3825 | 0.7502 | 0.0000 | 0.0086 | 0.6330 | 0.4104 | 0.0000 | 0.0193 | 0.4154 | 0.0093 | 0.6132 | 0.4953 |
| FABP3_P598_F  | 0.6371 | 0.9896 | 0.2053 | 0.9927 | 0.9889 | 0.3485 | 0.3722 | 0.3079 | 0.1535 | 0.9947 | 0.9822 | 0.6898 | 0.6221 | 0.3416 | 0.4234 |
| FANCE_P356_R  | 0.0123 | 0.0000 | 0.0000 | 0.0000 | 0.0000 | 0.0000 | 0.0000 | 0.1524 | 0.0000 | 0.9907 | 0.0085 | 0.0000 | 0.9240 | 0.5679 | 0.8016 |
| FANCF_P13_F   | 0.6090 | 0.6642 | 0.9827 | 0.9022 | 0.6394 | 0.7808 | 0.5997 | 0.6437 | 0.9141 | 0.0514 | 0.6633 | 0.1641 | 0.6423 | 0.5542 | 0.0121 |
| FANCG_E207_R  | 0.1400 | 0.1192 | 0.1492 | 0.9932 | 0.1124 | 0.9342 | 0.0600 | 0.0844 | 0.0780 | 0.2225 | 0.0579 | 0.3791 | 0.4041 | 0.0512 | 0.1054 |
| FAS_P322_R    | 0.0032 | 0.1502 | 0.9874 | 0.0000 | 0.0112 | 0.9957 | 0.0051 | 0.9740 | 0.9628 | 0.0000 | 0.3968 | 0.1155 | 0.7100 | 0.9699 | 0.0000 |
| FASTK_P257_F  | 0.9054 | 0.7704 | 0.0766 | 0.0007 | 0.0780 | 0.0969 | 0.0871 | 0.0312 | 0.3715 | 0.0875 | 0.0876 | 0.0822 | 0.8268 | 0.0831 | 0.7259 |

|               |        |        |        |        |        |        |        |        |        |        |        |        |        |        |        |
|---------------|--------|--------|--------|--------|--------|--------|--------|--------|--------|--------|--------|--------|--------|--------|--------|
| FAT_P973_R    | 0.0000 | 0.0000 | 0.2524 | 0.0000 | 0.2910 | 0.7271 | 0.1201 | 0.0125 | 0.0174 | 0.4471 | 0.0000 | 0.0735 | 0.3212 | 0.0144 | 0.0000 |
| FER_P581_F    | 0.9786 | 0.2413 | 0.9806 | 0.0000 | 0.2822 | 0.2174 | 0.3252 | 0.9229 | 0.8824 | 0.9795 | 0.8753 | 0.9882 | 0.9550 | 0.3425 | 0.7516 |
| FES_P223_R    | 0.0000 | 0.0000 | 0.0000 | 0.0000 | 0.9898 | 0.0000 | 0.0000 | 0.0000 | 0.8354 | 0.0000 | 0.0000 | 0.9819 | 0.9851 | 0.9725 | 0.9826 |
| FGF1_E5_F     | 0.4000 | 0.3717 | 0.0736 | 0.2418 | 0.9900 | 0.4883 | 0.9597 | 0.8744 | 0.8915 | 0.0435 | 0.3478 | 0.3128 | 0.9090 | 0.8586 | 0.9253 |
| FGF12_E61_R   | 0.6496 | 0.3451 | 0.0066 | 0.0000 | 0.5944 | 0.3927 | 0.0074 | 0.0159 | 0.0121 | 0.2094 | 0.6959 | 0.9202 | 0.0107 | 0.8479 | 0.0000 |
| FGF12_P210_R  | 0.0047 | 0.0634 | 0.6375 | 0.0000 | 0.9929 | 0.3996 | 0.0080 | 0.9857 | 0.9828 | 0.1727 | 0.9929 | 0.1367 | 0.1895 | 0.9851 | 0.9808 |
| FGF2_P153_F   | 0.0160 | 0.1367 | 0.2192 | 0.8356 | 0.0128 | 0.2186 | 0.1631 | 0.3852 | 0.0250 | 0.1584 | 0.0322 | 0.2621 | 0.9561 | 0.0182 | 0.0053 |
| FGF2_P229_F   | 0.0609 | 0.0438 | 0.4919 | 0.6978 | 0.0239 | 0.5225 | 0.0415 | 0.7173 | 0.0463 | 0.4751 | 0.2328 | 0.0473 | 0.0424 | 0.3817 | 0.3210 |
| FGF3_E198_R   | 0.9893 | 0.9920 | 0.9875 | 0.9498 | 0.9845 | 0.9935 | 0.9906 | 0.9776 | 0.5286 | 0.9909 | 0.9875 | 0.9881 | 0.9855 | 0.9769 | 0.7411 |
| FGF3_P171_R   | 0.7033 | 0.0096 | 0.8902 | 0.0000 | 0.9923 | 0.0216 | 0.8149 | 0.8758 | 0.9327 | 0.8261 | 0.0000 | 0.5026 | 0.8397 | 0.0009 | 0.6095 |
| FGF5_E16_F    | 0.0000 | 0.9944 | 0.0387 | 0.0000 | 0.8658 | 0.9961 | 0.0000 | 0.9879 | 0.3246 | 0.0000 | 0.9907 | 0.3269 | 0.9871 | 0.9796 | 0.6335 |
| FGF5_P238_R   | 0.7281 | 0.0078 | 0.0012 | 0.0000 | 0.0000 | 0.0000 | 0.9948 | 0.8745 | 0.2141 | 0.0000 | 0.0143 | 0.0077 | 0.4429 | 0.0272 | 0.0545 |
| FGF6_E294_F   | 0.7395 | 0.7766 | 0.7804 | 0.9504 | 0.0467 | 0.8350 | 0.9932 | 0.9756 | 0.0575 | 0.7765 | 0.0541 | 0.0434 | 0.9913 | 0.7901 | 0.9814 |
| FGF7_P44_F    | 0.7765 | 0.0000 | 0.0015 | 0.0000 | 0.0020 | 0.0000 | 0.0000 | 0.6615 | 0.0050 | 0.0000 | 0.0000 | 0.0000 | 0.0000 | 0.8763 | 0.2742 |
| FGF8_E183_F   | 0.0000 | 0.3374 | 0.3779 | 0.0000 | 0.1889 | 0.0765 | 0.1897 | 0.0628 | 0.0416 | 0.0000 | 0.2281 | 0.0000 | 0.1169 | 0.0142 | 0.0000 |
| FGF8_P473_F   | 0.0000 | 0.0000 | 0.0000 | 0.0000 | 0.6345 | 0.0000 | 0.0000 | 0.0000 | 0.9739 | 0.0000 | 0.0000 | 0.0040 | 0.0028 | 0.0000 | 0.1481 |
| FGFR1_E317_F  | 0.0122 | 0.0085 | 0.1579 | 0.0000 | 0.1360 | 0.0000 | 0.0000 | 0.0613 | 0.0210 | 0.0130 | 0.0135 | 0.0157 | 0.0000 | 0.1615 | 0.9716 |
| FGFR2_P266_R  | 0.0108 | 0.2509 | 0.0159 | 0.0000 | 0.4110 | 0.2444 | 0.0122 | 0.0073 | 0.0100 | 0.3064 | 0.1784 | 0.0114 | 0.0070 | 0.0107 | 0.0000 |
| FGFR3_E297_R  | 0.0083 | 0.9954 | 0.0000 | 0.0000 | 0.0603 | 0.0000 | 0.0000 | 0.0000 | 0.9034 | 0.0000 | 0.0000 | 0.0000 | 0.0155 | 0.9752 | 0.9737 |
| FGFR3_P1152_R | 0.0000 | 0.7837 | 0.3309 | 0.0000 | 0.9907 | 0.6886 | 0.6487 | 0.9443 | 0.9339 | 0.0024 | 0.8794 | 0.9888 | 0.5965 | 0.9195 | 0.8363 |
| FHIT_E19_R    | 0.9923 | 0.0000 | 0.0000 | 0.0000 | 0.0000 | 0.0000 | 0.9920 | 0.9755 | 0.6865 | 0.0000 | 0.9908 | 0.9833 | 0.0000 | 0.9873 | 0.9329 |
| FHIT_P93_R    | 0.0040 | 0.0849 | 0.0055 | 0.0000 | 0.0000 | 0.0000 | 0.0000 | 0.0057 | 0.0088 | 0.0000 | 0.0000 | 0.0000 | 0.0044 | 0.0085 | 0.5870 |
| FHL1_E229_R   | 0.0000 | 0.0028 | 0.0000 | 0.0000 | 0.0028 | 0.0000 | 0.0034 | 0.3966 | 0.0014 | 0.0000 | 0.0000 | 0.0000 | 0.0007 | 0.0025 | 0.0000 |
| FLI1_P620_R   | 0.9863 | 0.9824 | 0.0502 | 0.0000 | 0.0000 | 0.2338 | 0.0000 | 0.0206 | 0.9626 | 0.0000 | 0.0000 | 0.9788 | 0.8063 | 0.9588 | 0.7576 |
| FLT1_E444_F   | 0.0166 | 0.7793 | 0.6803 | 0.8685 | 0.0133 | 0.8961 | 0.0177 | 0.0171 | 0.8053 | 0.7954 | 0.6841 | 0.0393 | 0.4384 | 0.7938 | 0.8375 |
| FLT1_P302_F   | 0.8212 | 0.2242 | 0.0227 | 0.0543 | 0.0147 | 0.2583 | 0.1695 | 0.0516 | 0.4261 | 0.2282 | 0.6887 | 0.0325 | 0.0271 | 0.0298 | 0.0059 |
| FLT1_P615_R   | 0.1381 | 0.1599 | 0.2167 | 0.0496 | 0.3969 | 0.2128 | 0.0111 | 0.9817 | 0.0096 | 0.1306 | 0.0258 | 0.0146 | 0.9757 | 0.1382 | 0.3678 |
| FLT3_E326_R   | 0.0074 | 0.3251 | 0.0318 | 0.0000 | 0.0121 | 0.3503 | 0.2214 | 0.0108 | 0.1411 | 0.0135 | 0.0067 | 0.0067 | 0.0051 | 0.3820 | 0.0000 |
| FLT4_P180_R   | 0.9795 | 0.9840 | 0.0851 | 0.0808 | 0.9923 | 0.9844 | 0.1219 | 0.9590 | 0.9868 | 0.0424 | 0.9727 | 0.2556 | 0.9328 | 0.8127 | 0.9614 |
| FMR1_P62_R    | 0.5518 | 0.5385 | 0.5227 | 0.7504 | 0.4233 | 0.9239 | 0.4794 | 0.6224 | 0.3405 | 0.6625 | 0.4770 | 0.6789 | 0.5775 | 0.2650 | 0.4611 |
| FN1_E469_F    | 0.0064 | 0.0000 | 0.0032 | 0.0000 | 0.0000 | 0.0000 | 0.0000 | 0.0000 | 0.0000 | 0.0000 | 0.0000 | 0.0073 | 0.0052 | 0.0000 | 0.0000 |
| FN1_P229_R    | 0.0128 | 0.9951 | 0.0072 | 0.0000 | 0.0110 | 0.4506 | 0.2744 | 0.0188 | 0.0178 | 0.0133 | 0.4136 | 0.0170 | 0.0141 | 0.0221 | 0.2009 |
| FOSL2_E384_R  | 0.0082 | 0.1072 | 0.7509 | 0.0000 | 0.9922 | 0.2581 | 0.2519 | 0.0084 | 0.9714 | 0.9956 | 0.7474 | 0.9924 | 0.9927 | 0.0062 | 0.9050 |

|                |        |        |        |        |        |        |        |        |        |        |        |        |        |        |        |
|----------------|--------|--------|--------|--------|--------|--------|--------|--------|--------|--------|--------|--------|--------|--------|--------|
| FRK_P36_F      | 0.0102 | 0.0000 | 0.0063 | 0.0000 | 0.0057 | 0.0000 | 0.0022 | 0.0191 | 0.4128 | 0.0000 | 0.0000 | 0.0144 | 0.0094 | 0.0084 | 0.0946 |
| FRZB_E186_R    | 0.0000 | 0.0000 | 0.1279 | 0.0000 | 0.0000 | 0.0000 | 0.0000 | 0.0000 | 0.6707 | 0.1363 | 0.0000 | 0.0000 | 0.0000 | 0.9740 | 0.8986 |
| FRZB_P406_F    | 0.0000 | 0.0000 | 0.0016 | 0.5784 | 0.0000 | 0.0000 | 0.0000 | 0.0000 | 0.0016 | 0.0051 | 0.9890 | 0.0033 | 0.0001 | 0.0000 | 0.0000 |
| FVT1_P225_F    | 0.0091 | 0.0000 | 0.0205 | 0.0000 | 0.0085 | 0.3616 | 0.0107 | 0.0092 | 0.0104 | 0.0000 | 0.0043 | 0.0142 | 0.0107 | 0.0059 | 0.3665 |
| FYN_P352_R     | 0.9947 | 0.9947 | 0.9936 | 0.9992 | 0.9930 | 0.9970 | 0.6616 | 0.9901 | 0.9852 | 0.9972 | 0.9941 | 0.9968 | 0.9965 | 0.9855 | 0.9923 |
| FZD7_E296_F    | 0.0000 | 0.0000 | 0.9925 | 0.0000 | 0.0366 | 0.0000 | 0.0761 | 0.9768 | 0.9661 | 0.9921 | 0.9901 | 0.0000 | 0.0106 | 0.0000 | 0.9864 |
| FZD9_E458_F    | 0.0000 | 0.0000 | 0.9913 | 0.0000 | 0.9897 | 0.0000 | 0.9921 | 0.9576 | 0.9116 | 0.0000 | 0.0000 | 0.0000 | 0.0000 | 0.0000 | 0.9734 |
| FZD9_P15_R     | 0.0053 | 0.0000 | 0.0037 | 0.2192 | 0.0000 | 0.0018 | 0.0000 | 0.0000 | 0.0064 | 0.0119 | 0.0000 | 0.0068 | 0.0000 | 0.0007 | 0.0000 |
| FZD9_P175_F    | 0.0157 | 0.1749 | 0.1974 | 0.0823 | 0.0069 | 0.1966 | 0.9861 | 0.3839 | 0.6022 | 0.0220 | 0.1453 | 0.1781 | 0.3498 | 0.0080 | 0.6410 |
| G6PD_E190_F    | 0.0000 | 0.0039 | 0.0000 | 0.0000 | 0.0000 | 0.0000 | 0.0000 | 0.6745 | 0.0000 | 0.0000 | 0.0000 | 0.0000 | 0.0000 | 0.0020 | 0.3557 |
| G6PD_P196_F    | 0.5340 | 0.5931 | 0.5550 | 0.8700 | 0.0089 | 0.7761 | 0.6143 | 0.4828 | 0.5826 | 0.0144 | 0.5121 | 0.0415 | 0.0140 | 0.5021 | 0.0000 |
| GABRB3_E42_F   | 0.0055 | 0.0000 | 0.0000 | 0.0000 | 0.0000 | 0.0000 | 0.0054 | 0.0000 | 0.9648 | 0.0043 | 0.0000 | 0.0059 | 0.0038 | 0.0013 | 0.0000 |
| GADD45A_P737_R | 0.0266 | 0.0320 | 0.6443 | 0.9118 | 0.0153 | 0.5100 | 0.0173 | 0.5622 | 0.5931 | 0.0235 | 0.3269 | 0.0366 | 0.3665 | 0.0240 | 0.0004 |
| GALR1_E52_F    | 0.0093 | 0.0000 | 0.0277 | 0.0000 | 0.0170 | 0.0000 | 0.2511 | 0.0253 | 0.0149 | 0.0102 | 0.0060 | 0.0069 | 0.1181 | 0.0139 | 0.0000 |
| GALR1_P80_F    | 0.5504 | 0.1296 | 0.3976 | 0.0000 | 0.0089 | 0.0000 | 0.0093 | 0.0094 | 0.0122 | 0.0136 | 0.0014 | 0.0095 | 0.1548 | 0.0000 | 0.0000 |
| GAS1_E22_F     | 0.0000 | 0.0826 | 0.2580 | 0.0000 | 0.1420 | 0.2774 | 0.0000 | 0.4144 | 0.0117 | 0.0000 | 0.0060 | 0.0109 | 0.0051 | 0.0056 | 0.0000 |
| GAS1_P754_R    | 0.0000 | 0.0000 | 0.0000 | 0.0000 | 0.0000 | 0.0000 | 0.0050 | 0.0034 | 0.0015 | 0.0000 | 0.0020 | 0.0039 | 0.0038 | 0.0036 | 0.0000 |
| GAS7_E148_F    | 0.0076 | 0.4877 | 0.0151 | 0.0000 | 0.3512 | 0.3345 | 0.2857 | 0.3957 | 0.5024 | 0.0162 | 0.0065 | 0.0141 | 0.0564 | 0.0124 | 0.0000 |
| GAS7_P622_R    | 0.0000 | 0.0000 | 0.0000 | 0.0000 | 0.0000 | 0.0000 | 0.0031 | 0.0000 | 0.0000 | 0.0000 | 0.0000 | 0.0000 | 0.0000 | 0.0000 | 0.0000 |
| GATA6_P21_R    | 0.0061 | 0.0045 | 0.0064 | 0.0000 | 0.0000 | 0.0000 | 0.0044 | 0.0069 | 0.1766 | 0.0044 | 0.0057 | 0.0000 | 0.0055 | 0.0047 | 0.0000 |
| GATA6_P726_F   | 0.0090 | 0.0820 | 0.1839 | 0.0000 | 0.4387 | 0.1106 | 0.1163 | 0.4533 | 0.0350 | 0.2003 | 0.2059 | 0.0252 | 0.2166 | 0.0105 | 0.0000 |
| GFI1_E136_F    | 0.1029 | 0.1408 | 0.2679 | 0.6061 | 0.2072 | 0.0000 | 0.2258 | 0.0963 | 0.0092 | 0.0000 | 0.0129 | 0.0226 | 0.0059 | 0.0129 | 0.0000 |
| GFI1_P45_R     | 0.0012 | 0.7759 | 0.0052 | 0.0000 | 0.0018 | 0.0000 | 0.0000 | 0.0046 | 0.2110 | 0.0065 | 0.0053 | 0.0032 | 0.0000 | 0.0000 | 0.0000 |
| GJB2_E43_F     | 0.0000 | 0.0000 | 0.0052 | 0.0000 | 0.0000 | 0.0000 | 0.0036 | 0.0149 | 0.0109 | 0.0000 | 0.0124 | 0.0052 | 0.0073 | 0.0000 | 0.0000 |
| GJB2_P791_R    | 0.1447 | 0.2101 | 0.0122 | 0.0596 | 0.0065 | 0.1678 | 0.1192 | 0.0123 | 0.0102 | 0.0150 | 0.0108 | 0.0119 | 0.1623 | 0.0108 | 0.0102 |
| GJB2_P931_R    | 0.3154 | 0.3423 | 0.0410 | 0.1211 | 0.0244 | 0.2928 | 0.3346 | 0.0449 | 0.0410 | 0.3172 | 0.0420 | 0.0743 | 0.0423 | 0.1108 | 0.0253 |
| GLA_P112_F     | 0.0127 | 0.0047 | 0.1993 | 0.0000 | 0.0081 | 0.0000 | 0.0109 | 0.9004 | 0.0277 | 0.0157 | 0.1575 | 0.0133 | 0.0271 | 0.0122 | 0.6942 |
| GLI2_E90_F     | 0.9441 | 0.9947 | 0.9906 | 0.0000 | 0.0000 | 0.0000 | 0.0000 | 0.9812 | 0.9829 | 0.0000 | 0.9889 | 0.9855 | 0.9880 | 0.9845 | 0.9654 |
| GLI3_E148_R    | 0.8800 | 0.0679 | 0.9900 | 0.0940 | 0.0778 | 0.1344 | 0.0245 | 0.6854 | 0.8981 | 0.1279 | 0.9797 | 0.9864 | 0.7363 | 0.8743 | 0.9126 |
| GML_P281_R     | 0.0000 | 0.0000 | 0.0000 | 0.0000 | 0.9382 | 0.0000 | 0.9942 | 0.7191 | 0.9821 | 0.0000 | 0.9914 | 0.9862 | 0.0000 | 0.5284 | 0.9843 |
| GNAS_E58_F     | 0.0000 | 0.0000 | 0.0000 | 0.0000 | 0.0000 | 0.0000 | 0.0080 | 0.8241 | 0.7433 | 0.0000 | 0.0000 | 0.1961 | 0.0069 | 0.9841 | 0.8283 |
| GP1BB_E23_F    | 0.0056 | 0.0085 | 0.0048 | 0.0000 | 0.0056 | 0.0764 | 0.0073 | 0.0091 | 0.4989 | 0.0000 | 0.0060 | 0.0098 | 0.0098 | 0.0244 | 0.0000 |
| GPC3_P235_R    | 0.0093 | 0.1236 | 0.0005 | 0.7451 | 0.0582 | 0.0000 | 0.0000 | 0.0068 | 0.0056 | 0.0000 | 0.0000 | 0.0000 | 0.2350 | 0.4409 | 0.0000 |

|                     |        |        |        |        |        |        |        |        |        |        |        |        |        |        |        |
|---------------------|--------|--------|--------|--------|--------|--------|--------|--------|--------|--------|--------|--------|--------|--------|--------|
| GPR116_E328_R       | 0.9932 | 0.9172 | 0.9910 | 0.0000 | 0.9901 | 0.0000 | 0.9936 | 0.8701 | 0.9855 | 0.0000 | 0.0000 | 0.9896 | 0.9897 | 0.9902 | 0.9901 |
| GPX1_E46_R          | 0.0113 | 0.0052 | 0.3372 | 0.0000 | 0.0000 | 0.0000 | 0.1781 | 0.1240 | 0.0089 | 0.0608 | 0.1632 | 0.0064 | 0.0049 | 0.0085 | 0.0000 |
| GPX1_P194_F         | 0.0455 | 0.6473 | 0.7215 | 0.3761 | 0.0317 | 0.7538 | 0.0304 | 0.0226 | 0.0268 | 0.6734 | 0.0273 | 0.0361 | 0.0439 | 0.0452 | 0.0000 |
| GPX3_E178_F         | 0.0100 | 0.0088 | 0.0084 | 0.0645 | 0.1571 | 0.0055 | 0.0092 | 0.2831 | 0.0128 | 0.0221 | 0.0075 | 0.0159 | 0.6127 | 0.0120 | 0.0615 |
| GRB10_E85_R         | 0.0090 | 0.9746 | 0.0000 | 0.0000 | 0.0032 | 0.0000 | 0.1329 | 0.0065 | 0.6931 | 0.0000 | 0.0078 | 0.0061 | 0.0060 | 0.0052 | 0.0000 |
| GRB10_P260_F        | 0.0000 | 0.0154 | 0.0000 | 0.0000 | 0.0042 | 0.1636 | 0.0000 | 0.0157 | 0.0040 | 0.0000 | 0.0053 | 0.0000 | 0.1029 | 0.0078 | 0.0000 |
| GRB10_P496_R        | 0.1344 | 0.0000 | 0.0052 | 0.0000 | 0.0000 | 0.1170 | 0.0000 | 0.1315 | 0.0078 | 0.0076 | 0.1531 | 0.1418 | 0.1287 | 0.0031 | 0.0000 |
| GRPR_P200_R         | 0.1858 | 0.9806 | 0.2160 | 0.5716 | 0.2003 | 0.1741 | 0.9802 | 0.8962 | 0.9562 | 0.2218 | 0.1749 | 0.2708 | 0.9455 | 0.9767 | 0.9318 |
| GSTM1_P363_F        | 0.1449 | 0.0831 | 0.0051 | 0.0306 | 0.1880 | 0.1172 | 0.0093 | 0.9843 | 0.6486 | 0.0138 | 0.0096 | 0.6566 | 0.0872 | 0.9837 | 0.0000 |
| GSTM2_E153_F        | 0.0000 | 0.0000 | 0.0062 | 0.0000 | 0.0007 | 0.0000 | 0.0000 | 0.0073 | 0.2512 | 0.0000 | 0.0050 | 0.0070 | 0.0000 | 0.0000 | 0.0396 |
| GSTM2_P109_R        | 0.0000 | 0.0000 | 0.0000 | 0.0000 | 0.0014 | 0.0000 | 0.0000 | 0.0056 | 0.0039 | 0.0099 | 0.0047 | 0.0046 | 0.0000 | 0.0000 | 0.0000 |
| GSTM2_P453_R        | 0.9911 | 0.0000 | 0.0021 | 0.0000 | 0.9902 | 0.0000 | 0.9920 | 0.0000 | 0.7480 | 0.0085 | 0.0000 | 0.6550 | 0.0072 | 0.0000 | 0.9804 |
| GSTP1_E322_R        | 0.0000 | 0.0000 | 0.0003 | 0.0000 | 0.0000 | 0.4388 | 0.0000 | 0.2090 | 0.0089 | 0.2984 | 0.1866 | 0.0099 | 0.0982 | 0.0000 | 0.0000 |
| GSTP1_P74_F         | 0.0287 | 0.3086 | 0.0479 | 0.0000 | 0.2347 | 0.6115 | 0.0231 | 0.0298 | 0.0613 | 0.7141 | 0.2526 | 0.4364 | 0.1584 | 0.0378 | 0.0000 |
| GSTP1_seq_38_S153_R | 0.0087 | 0.0000 | 0.0000 | 0.0000 | 0.0000 | 0.0000 | 0.0000 | 0.0065 | 0.0038 | 0.0000 | 0.0091 | 0.0000 | 0.9872 | 0.0005 | 0.0000 |
| GUCY2D_E419_R       | 0.0038 | 0.0000 | 0.0053 | 0.0000 | 0.0019 | 0.0000 | 0.0071 | 0.0109 | 0.0069 | 0.0000 | 0.0000 | 0.0063 | 0.0054 | 0.0000 | 0.0000 |
| HBEGF_P32_R         | 0.0065 | 0.0000 | 0.0028 | 0.0000 | 0.0000 | 0.0000 | 0.0000 | 0.0045 | 0.0000 | 0.0070 | 0.0076 | 0.0043 | 0.0000 | 0.0018 | 0.0000 |
| HBII-13_E48_F       | 0.0000 | 0.0000 | 0.0000 | 0.4333 | 0.0000 | 0.9942 | 0.0000 | 0.9852 | 0.9790 | 0.0000 | 0.0000 | 0.9848 | 0.9831 | 0.9784 | 0.0000 |
| HBII-52_P563_F      | 0.9871 | 0.5949 | 0.8458 | 0.0987 | 0.9934 | 0.6508 | 0.6529 | 0.7172 | 0.7808 | 0.9945 | 0.5755 | 0.0427 | 0.6219 | 0.5960 | 0.9326 |
| HCK_P46_R           | 0.1899 | 0.1637 | 0.0113 | 0.0000 | 0.2968 | 0.0000 | 0.0064 | 0.0160 | 0.0142 | 0.0145 | 0.0065 | 0.0000 | 0.0000 | 0.0072 | 0.0000 |
| HCK_P858_F          | 0.0907 | 0.5830 | 0.0365 | 0.2427 | 0.6229 | 0.5047 | 0.0411 | 0.0190 | 0.0161 | 0.5794 | 0.0270 | 0.0483 | 0.0381 | 0.0299 | 0.0000 |
| HDAC1_P414_R        | 0.0000 | 0.0149 | 0.0067 | 0.0000 | 0.0068 | 0.2000 | 0.0076 | 0.5569 | 0.2985 | 0.0074 | 0.0073 | 0.6814 | 0.0000 | 0.0072 | 0.0000 |
| HDAC11_P556_F       | 0.0000 | 0.0113 | 0.0000 | 0.0000 | 0.0000 | 0.0000 | 0.0000 | 0.0016 | 0.0000 | 0.0000 | 0.0050 | 0.0000 | 0.0059 | 0.0007 | 0.0000 |
| HDAC9_P137_R        | 0.0000 | 0.0030 | 0.0006 | 0.0000 | 0.0031 | 0.0000 | 0.0000 | 0.2100 | 0.0029 | 0.0046 | 0.7257 | 0.0034 | 0.0024 | 0.4259 | 0.0000 |
| HFE_E273_R          | 0.0054 | 0.0000 | 0.0015 | 0.0000 | 0.0086 | 0.0000 | 0.0117 | 0.0057 | 0.0042 | 0.0000 | 0.0076 | 0.0703 | 0.0000 | 0.0008 | 0.0000 |
| HHIP_P307_R         | 0.1344 | 0.1103 | 0.0206 | 0.0120 | 0.0119 | 0.1150 | 0.0136 | 0.0202 | 0.0230 | 0.0205 | 0.1742 | 0.1495 | 0.1338 | 0.0291 | 0.0081 |
| HIC1_E151_F         | 0.0000 | 0.0000 | 0.0003 | 0.0000 | 0.0000 | 0.0042 | 0.0000 | 0.0000 | 0.0000 | 0.0000 | 0.0000 | 0.0000 | 0.0000 | 0.0000 | 0.0000 |
| HIC1_P565_R         | 0.0000 | 0.0000 | 0.0000 | 0.0000 | 0.0098 | 0.0000 | 0.0000 | 0.0000 | 0.0225 | 0.0000 | 0.0000 | 0.0052 | 0.0000 | 0.0223 | 0.0000 |
| HIC2_P498_F         | 0.0000 | 0.0000 | 0.0076 | 0.0000 | 0.0033 | 0.0000 | 0.0000 | 0.0074 | 0.0045 | 0.0000 | 0.0047 | 0.0000 | 0.0063 | 0.0047 | 0.0000 |
| HIC2_P528_R         | 0.0000 | 0.0000 | 0.0000 | 0.0000 | 0.0067 | 0.0000 | 0.0000 | 0.0105 | 0.0080 | 0.0000 | 0.0073 | 0.0000 | 0.0083 | 0.0043 | 0.0000 |
| HIF1A_P488_F        | 0.0102 | 0.0000 | 0.0000 | 0.0000 | 0.0000 | 0.0000 | 0.0000 | 0.0000 | 0.0000 | 0.0000 | 0.0020 | 0.0127 | 0.0000 | 0.0006 | 0.0000 |
| HLA-DOB_P357_R      | 0.9852 | 0.9910 | 0.0000 | 0.0000 | 0.9729 | 0.0000 | 0.0000 | 0.9856 | 0.9824 | 0.0085 | 0.0000 | 0.9781 | 0.0000 | 0.9761 | 0.9720 |
| HLA-DPA1_P205_R     | 0.0067 | 0.1003 | 0.0076 | 0.0000 | 0.0063 | 0.0911 | 0.1280 | 0.0118 | 0.4729 | 0.1059 | 0.1075 | 0.0115 | 0.1449 | 0.0103 | 0.0000 |

|                 |        |        |        |        |        |        |        |        |        |        |        |        |        |        |        |
|-----------------|--------|--------|--------|--------|--------|--------|--------|--------|--------|--------|--------|--------|--------|--------|--------|
| HLA-DPA1_P28_R  | 0.0073 | 0.0000 | 0.0000 | 0.0000 | 0.0029 | 0.0000 | 0.0084 | 0.0066 | 0.0098 | 0.0000 | 0.0000 | 0.0039 | 0.0000 | 0.6945 | 0.2826 |
| HLA-DPB1_E2_R   | 0.0000 | 0.0000 | 0.0670 | 0.0000 | 0.0315 | 0.0000 | 0.5606 | 0.1012 | 0.5298 | 0.0000 | 0.0465 | 0.1285 | 0.4863 | 0.0135 | 0.0000 |
| HLA-DRA_P132_R  | 0.0000 | 0.0000 | 0.0000 | 0.0000 | 0.0000 | 0.0036 | 0.0000 | 0.0000 | 0.0000 | 0.0034 | 0.0000 | 0.0000 | 0.0045 | 0.0000 | 0.0000 |
| HLA-F_E402_F    | 0.0000 | 0.7293 | 0.0000 | 0.0000 | 0.0000 | 0.0002 | 0.0000 | 0.0000 | 0.0000 | 0.0000 | 0.0032 | 0.0000 | 0.0000 | 0.0000 | 0.0000 |
| HLF_E192_F      | 0.0435 | 0.0335 | 0.7724 | 0.4426 | 0.7845 | 0.6481 | 0.6712 | 0.0260 | 0.0165 | 0.0377 | 0.0228 | 0.0510 | 0.6405 | 0.0168 | 0.0065 |
| HOXA11_E35_F    | 0.0100 | 0.0000 | 0.0024 | 0.0388 | 0.0000 | 0.0000 | 0.0000 | 0.0049 | 0.0048 | 0.0055 | 0.0031 | 0.0020 | 0.0035 | 0.0022 | 0.0000 |
| HOXA11_P698_F   | 0.0252 | 0.6252 | 0.0220 | 0.9147 | 0.5669 | 0.7652 | 0.5501 | 0.0261 | 0.0198 | 0.5405 | 0.0348 | 0.0460 | 0.0278 | 0.0405 | 0.0000 |
| HOXA5_E187_F    | 0.0000 | 0.0000 | 0.0000 | 0.0000 | 0.9901 | 0.0000 | 0.0000 | 0.0000 | 0.9822 | 0.0000 | 0.0017 | 0.3238 | 0.9909 | 0.9788 | 0.9568 |
| HOXA9_E252_R    | 0.0000 | 0.1106 | 0.1606 | 0.0000 | 0.0000 | 0.0087 | 0.1146 | 0.0100 | 0.0060 | 0.0125 | 0.0086 | 0.0000 | 0.0137 | 0.0083 | 0.0000 |
| HOXA9_P1141_R   | 0.0172 | 0.1884 | 0.0183 | 0.0000 | 0.1954 | 0.2285 | 0.1887 | 0.0137 | 0.0211 | 0.0152 | 0.0142 | 0.0184 | 0.5280 | 0.0298 | 0.0000 |
| HOXA9_P303_F    | 0.0000 | 0.0028 | 0.0000 | 0.0000 | 0.0000 | 0.0000 | 0.0000 | 0.0021 | 0.0006 | 0.0017 | 0.0000 | 0.0005 | 0.0000 | 0.0000 | 0.0000 |
| HOXB13_E21_F    | 0.0063 | 0.0000 | 0.0054 | 0.0000 | 0.0028 | 0.0073 | 0.0000 | 0.0028 | 0.0021 | 0.0000 | 0.0035 | 0.0064 | 0.0034 | 0.0020 | 0.1196 |
| HOXB13_P17_R    | 0.0039 | 0.0000 | 0.0000 | 0.0000 | 0.0000 | 0.0026 | 0.0000 | 0.0039 | 0.0011 | 0.0000 | 0.0026 | 0.0044 | 0.0025 | 0.0032 | 0.0000 |
| HOXC6_P456_R    | 0.0375 | 0.9718 | 0.0247 | 0.9139 | 0.0259 | 0.7402 | 0.6371 | 0.0359 | 0.0365 | 0.0422 | 0.0650 | 0.7516 | 0.0813 | 0.0306 | 0.0938 |
| HPN_P374_R      | 0.0119 | 0.0113 | 0.0000 | 0.0000 | 0.0047 | 0.0000 | 0.0000 | 0.0007 | 0.0102 | 0.0000 | 0.0000 | 0.0861 | 0.0086 | 0.0015 | 0.0000 |
| HPN_P823_F      | 0.0000 | 0.0000 | 0.0000 | 0.0000 | 0.0000 | 0.0000 | 0.6695 | 0.0000 | 0.0000 | 0.0000 | 0.0000 | 0.0000 | 0.0026 | 0.7725 | 0.0000 |
| HPSE_P29_F      | 0.5322 | 0.6704 | 0.7175 | 0.9324 | 0.7293 | 0.6749 | 0.0214 | 0.0306 | 0.0232 | 0.0310 | 0.0279 | 0.0362 | 0.0342 | 0.5741 | 0.0031 |
| HPSE_P93_F      | 0.0031 | 0.0064 | 0.0000 | 0.0000 | 0.0032 | 0.0000 | 0.0000 | 0.0037 | 0.3064 | 0.0075 | 0.0048 | 0.0014 | 0.0061 | 0.0023 | 0.0000 |
| HRASLS_E72_R    | 0.0000 | 0.0000 | 0.0018 | 0.0000 | 0.0000 | 0.0000 | 0.0000 | 0.0000 | 0.0000 | 0.0000 | 0.0000 | 0.0000 | 0.0011 | 0.0000 | 0.0000 |
| HS3ST2_E145_R   | 0.0012 | 0.0000 | 0.0000 | 0.0000 | 0.0000 | 0.0000 | 0.0000 | 0.0025 | 0.0000 | 0.0000 | 0.0000 | 0.4683 | 0.0000 | 0.0002 | 0.0000 |
| HS3ST2_P546_F   | 0.0250 | 0.0098 | 0.0025 | 0.0000 | 0.0023 | 0.0000 | 0.0000 | 0.0115 | 0.3832 | 0.0084 | 0.0000 | 0.0069 | 0.0000 | 0.0111 | 0.0000 |
| HSD17B12_E145_R | 0.4093 | 0.3856 | 0.0124 | 0.0000 | 0.6528 | 0.0000 | 0.3879 | 0.5212 | 0.0283 | 0.0129 | 0.0000 | 0.0119 | 0.0297 | 0.0222 | 0.0000 |
| HTR1B_P222_F    | 0.0000 | 0.0505 | 0.0066 | 0.0000 | 0.0000 | 0.2110 | 0.0033 | 0.0046 | 0.0009 | 0.0098 | 0.0017 | 0.0000 | 0.0000 | 0.0001 | 0.0000 |
| HTR2A_P853_F    | 0.0000 | 0.0036 | 0.0022 | 0.0000 | 0.0000 | 0.0060 | 0.0000 | 0.0057 | 0.0039 | 0.0000 | 0.0000 | 0.1069 | 0.0000 | 0.0014 | 0.0000 |
| IAPP_E280_F     | 0.0000 | 0.0000 | 0.0000 | 0.0000 | 0.9924 | 0.9963 | 0.9946 | 0.9805 | 0.9845 | 0.0000 | 0.0000 | 0.0000 | 0.9882 | 0.9768 | 0.9379 |
| ICA1_P61_F      | 0.0000 | 0.0000 | 0.0000 | 0.0000 | 0.0000 | 0.0000 | 0.0000 | 0.0000 | 0.0000 | 0.0000 | 0.0000 | 0.0000 | 0.0000 | 0.0000 | 0.0000 |
| ICA1_P72_R      | 0.0071 | 0.0000 | 0.0000 | 0.1762 | 0.0000 | 0.0000 | 0.0066 | 0.0047 | 0.0000 | 0.0000 | 0.0028 | 0.0000 | 0.0000 | 0.0014 | 0.0000 |
| ICAM1_E242_F    | 0.0138 | 0.0116 | 0.0099 | 0.4493 | 0.0032 | 0.0046 | 0.2972 | 0.4827 | 0.0099 | 0.0081 | 0.0093 | 0.4891 | 0.2774 | 0.0126 | 0.0000 |
| ICAM1_P119_R    | 0.0059 | 0.0000 | 0.0056 | 0.0000 | 0.0000 | 0.0000 | 0.0000 | 0.0057 | 0.0092 | 0.0062 | 0.0046 | 0.0000 | 0.0000 | 0.0024 | 0.0000 |
| ICAM1_P386_R    | 0.0000 | 0.0000 | 0.0000 | 0.0000 | 0.0000 | 0.0000 | 0.0000 | 0.0000 | 0.0000 | 0.0000 | 0.0049 | 0.0051 | 0.6517 | 0.0000 | 0.0000 |
| ID1_P659_R      | 0.0000 | 0.0000 | 0.0000 | 0.0000 | 0.0000 | 0.0000 | 0.0000 | 0.0044 | 0.0049 | 0.0000 | 0.0027 | 0.0000 | 0.0039 | 0.0079 | 0.0000 |
| IFNG_P459_R     | 0.3215 | 0.2301 | 0.7399 | 0.0173 | 0.9898 | 0.2253 | 0.6618 | 0.8665 | 0.9856 | 0.0107 | 0.2815 | 0.6098 | 0.9779 | 0.7085 | 0.8633 |
| IFNGR1_P307_F   | 0.1248 | 0.1123 | 0.0080 | 0.7521 | 0.0054 | 0.0056 | 0.1520 | 0.1751 | 0.3752 | 0.1301 | 0.0136 | 0.0121 | 0.0079 | 0.0110 | 0.0000 |

|                |        |        |        |        |        |        |        |        |        |        |        |        |        |        |        |
|----------------|--------|--------|--------|--------|--------|--------|--------|--------|--------|--------|--------|--------|--------|--------|--------|
| IFNGR2_E164_F  | 0.0276 | 0.0368 | 0.0685 | 0.0000 | 0.0156 | 0.1498 | 0.1576 | 0.0248 | 0.0261 | 0.0150 | 0.0175 | 0.0206 | 0.0353 | 0.0288 | 0.0238 |
| IFNGR2_P377_R  | 0.8546 | 0.0040 | 0.0000 | 0.4974 | 0.0000 | 0.0000 | 0.0000 | 0.0010 | 0.0000 | 0.0050 | 0.9229 | 0.0000 | 0.0036 | 0.0000 | 0.6835 |
| IGF1_E394_F    | 0.0000 | 0.0000 | 0.9907 | 0.0000 | 0.9917 | 0.0000 | 0.9934 | 0.8983 | 0.8554 | 0.0000 | 0.0000 | 0.0000 | 0.8051 | 0.9810 | 0.9360 |
| IGF1_P933_F    | 0.1375 | 0.0074 | 0.0548 | 0.0000 | 0.0037 | 0.0000 | 0.9913 | 0.9417 | 0.9705 | 0.0000 | 0.9902 | 0.8116 | 0.9891 | 0.9850 | 0.2859 |
| IGF1R_E186_R   | 0.0013 | 0.0000 | 0.0046 | 0.0000 | 0.0000 | 0.0000 | 0.0052 | 0.0047 | 0.0057 | 0.0000 | 0.0041 | 0.0000 | 0.0000 | 0.0000 | 0.0000 |
| IGF1R_P325_R   | 0.3409 | 0.4804 | 0.0072 | 0.6081 | 0.0189 | 0.2494 | 0.4347 | 0.3545 | 0.0227 | 0.4797 | 0.3374 | 0.4909 | 0.0151 | 0.0451 | 0.0000 |
| IGF2_E134_R    | 0.0000 | 0.0000 | 0.0000 | 0.0000 | 0.0000 | 0.0000 | 0.0049 | 0.0000 | 0.0000 | 0.0008 | 0.0000 | 0.0000 | 0.0062 | 0.0000 | 0.0000 |
| IGF2_P1036_R   | 0.1121 | 0.0089 | 0.0112 | 0.0000 | 0.0072 | 0.0058 | 0.1405 | 0.0151 | 0.0221 | 0.0397 | 0.0128 | 0.0152 | 0.0188 | 0.0187 | 0.0000 |
| IGF2_P36_R     | 0.7861 | 0.0092 | 0.3004 | 0.0000 | 0.4127 | 0.4919 | 0.0841 | 0.0124 | 0.0191 | 0.3382 | 0.0133 | 0.2367 | 0.0568 | 0.1442 | 0.9702 |
| IGF2AS_P203_F  | 0.0000 | 0.0000 | 0.0000 | 0.0000 | 0.0000 | 0.0000 | 0.0000 | 0.0000 | 0.0000 | 0.0000 | 0.0000 | 0.0000 | 0.0000 | 0.0000 | 0.0000 |
| IGF2R_P396_R   | 0.8544 | 0.9567 | 0.2613 | 0.8701 | 0.9784 | 0.9454 | 0.4110 | 0.1221 | 0.2329 | 0.3981 | 0.4140 | 0.3388 | 0.9396 | 0.2336 | 0.1572 |
| IGFBP1_E48_R   | 0.0045 | 0.0085 | 0.0048 | 0.0000 | 0.1417 | 0.4013 | 0.0604 | 0.0053 | 0.0083 | 0.0196 | 0.0509 | 0.0053 | 0.0104 | 0.0076 | 0.0000 |
| IGFBP1_P12_R   | 0.3079 | 0.0202 | 0.0000 | 0.8048 | 0.1433 | 0.4285 | 0.2409 | 0.0134 | 0.0096 | 0.0102 | 0.0063 | 0.1502 | 0.0788 | 0.0038 | 0.0000 |
| IGFBP2_P306_F  | 0.0001 | 0.0133 | 0.0022 | 0.0028 | 0.0000 | 0.0059 | 0.0000 | 0.0000 | 0.0000 | 0.0044 | 0.0023 | 0.0005 | 0.0021 | 0.0000 | 0.0000 |
| IGFBP3_E65_R   | 0.0104 | 0.0122 | 0.0133 | 0.0000 | 0.0082 | 0.6581 | 0.0130 | 0.0182 | 0.0186 | 0.1795 | 0.5724 | 0.0179 | 0.1678 | 0.0247 | 0.0000 |
| IGFBP3_P1035_F | 0.0000 | 0.0039 | 0.0000 | 0.0034 | 0.0000 | 0.0000 | 0.0052 | 0.0018 | 0.0009 | 0.0000 | 0.0025 | 0.0016 | 0.0038 | 0.0000 | 0.0000 |
| IGFBP3_P423_R  | 0.0928 | 0.0043 | 0.1250 | 0.0000 | 0.0038 | 0.1372 | 0.0787 | 0.0101 | 0.0117 | 0.1043 | 0.0048 | 0.0103 | 0.0088 | 0.0089 | 0.0000 |
| IGFBP7_P371_F  | 0.1339 | 0.0061 | 0.0645 | 0.0405 | 0.0051 | 0.5104 | 0.2391 | 0.0150 | 0.0092 | 0.0000 | 0.0091 | 0.0072 | 0.1669 | 0.0186 | 0.0000 |
| IGSF4_P454_F   | 0.0086 | 0.0000 | 0.2658 | 0.0000 | 0.0000 | 0.3829 | 0.0041 | 0.0081 | 0.0076 | 0.0082 | 0.0095 | 0.0075 | 0.0054 | 0.0208 | 0.0000 |
| IGSF4_P86_R    | 0.0324 | 0.2650 | 0.0141 | 0.0000 | 0.0129 | 0.1907 | 0.0108 | 0.0446 | 0.0146 | 0.0640 | 0.0100 | 0.0147 | 0.5166 | 0.0208 | 0.0000 |
| IGSF4C_E65_F   | 0.9933 | 0.0000 | 0.0000 | 0.0000 | 0.4736 | 0.0000 | 0.9810 | 0.6286 | 0.9471 | 0.0000 | 0.8314 | 0.0000 | 0.0038 | 0.9874 | 0.8157 |
| IGSF4C_P533_R  | 0.0075 | 0.0065 | 0.9903 | 0.0000 | 0.0097 | 0.0000 | 0.0000 | 0.0073 | 0.0097 | 0.0103 | 0.0000 | 0.0106 | 0.0067 | 0.0065 | 0.0000 |
| IHH_E186_F     | 0.0000 | 0.0000 | 0.0002 | 0.0000 | 0.0000 | 0.1361 | 0.0000 | 0.0000 | 0.0029 | 0.0000 | 0.0000 | 0.0024 | 0.0000 | 0.0035 | 0.0000 |
| IHH_P246_R     | 0.0145 | 0.0000 | 0.0269 | 0.0000 | 0.9894 | 0.0000 | 0.0102 | 0.0000 | 0.0734 | 0.0070 | 0.0000 | 0.0000 | 0.9887 | 0.0104 | 0.0000 |
| IHH_P529_F     | 0.0000 | 0.0000 | 0.0000 | 0.0000 | 0.0000 | 0.0000 | 0.0000 | 0.0000 | 0.0133 | 0.0114 | 0.0054 | 0.0070 | 0.0177 | 0.0107 | 0.0000 |
| IL10_P85_F     | 0.8460 | 0.0000 | 0.0000 | 0.0000 | 0.0000 | 0.0000 | 0.0058 | 0.0043 | 0.5212 | 0.0045 | 0.0040 | 0.0000 | 0.0000 | 0.4126 | 0.0000 |
| IL11_P11_R     | 0.0106 | 0.0000 | 0.0129 | 0.0000 | 0.0000 | 0.0000 | 0.0000 | 0.0040 | 0.0103 | 0.0099 | 0.0106 | 0.0000 | 0.0000 | 0.0120 | 0.0000 |
| IL12A_E287_R   | 0.0030 | 0.0002 | 0.0032 | 0.0000 | 0.0016 | 0.0049 | 0.0040 | 0.0027 | 0.0029 | 0.0033 | 0.0000 | 0.0039 | 0.0000 | 0.0014 | 0.0000 |
| IL12B_P392_R   | 0.0289 | 0.0062 | 0.0015 | 0.0018 | 0.0014 | 0.0064 | 0.0047 | 0.2192 | 0.0867 | 0.0033 | 0.2074 | 0.0013 | 0.0016 | 0.3805 | 0.0610 |
| IL13_E75_R     | 0.7336 | 0.9950 | 0.8373 | 0.3665 | 0.0862 | 0.8123 | 0.6684 | 0.7963 | 0.9770 | 0.7355 | 0.0636 | 0.9247 | 0.9927 | 0.9845 | 0.9824 |
| IL17RB_E164_R  | 0.0001 | 0.0000 | 0.0084 | 0.0000 | 0.0000 | 0.0000 | 0.0000 | 0.0046 | 0.0000 | 0.0000 | 0.0120 | 0.0061 | 0.0066 | 0.1109 | 0.0000 |
| IL17RB_P788_R  | 0.0000 | 0.0000 | 0.0000 | 0.0000 | 0.0000 | 0.0000 | 0.0000 | 0.0000 | 0.0000 | 0.0000 | 0.0000 | 0.0000 | 0.0000 | 0.0000 | 0.0000 |
| IL18BP_P51_R   | 0.0399 | 0.0191 | 0.2889 | 0.1761 | 0.0201 | 0.2941 | 0.2704 | 0.0251 | 0.0272 | 0.2457 | 0.0274 | 0.1060 | 0.2462 | 0.0458 | 0.0018 |

|               |        |        |        |        |        |        |        |        |        |        |        |        |        |        |        |
|---------------|--------|--------|--------|--------|--------|--------|--------|--------|--------|--------|--------|--------|--------|--------|--------|
| IL1A_E113_R   | 0.0096 | 0.0786 | 0.9914 | 0.5219 | 0.9910 | 0.9957 | 0.2081 | 0.9909 | 0.9850 | 0.1160 | 0.2713 | 0.9867 | 0.8079 | 0.9873 | 0.9906 |
| IL1RN_E42_F   | 0.9898 | 0.0000 | 0.0000 | 0.0000 | 0.9860 | 0.9953 | 0.0000 | 0.9841 | 0.9442 | 0.0000 | 0.6661 | 0.9766 | 0.9901 | 0.9895 | 0.9788 |
| IL3_P556_F    | 0.8770 | 0.0000 | 0.0000 | 0.0000 | 0.0000 | 0.9962 | 0.0000 | 0.9870 | 0.9758 | 0.9933 | 0.9916 | 0.8853 | 0.9897 | 0.2989 | 0.9824 |
| IL6_E168_F    | 0.0751 | 0.0783 | 0.1117 | 0.6638 | 0.0000 | 0.3423 | 0.0241 | 0.6075 | 0.0104 | 0.0153 | 0.0110 | 0.0213 | 0.1341 | 0.5016 | 0.0000 |
| IL8_E118_R    | 0.0000 | 0.0000 | 0.0000 | 0.0000 | 0.0000 | 0.0000 | 0.0000 | 0.0047 | 0.0000 | 0.0000 | 0.0053 | 0.0056 | 0.0000 | 0.0000 | 0.7561 |
| IL8_P83_F     | 0.0000 | 0.0000 | 0.0000 | 0.0000 | 0.0000 | 0.0000 | 0.0000 | 0.0000 | 0.8733 | 0.0000 | 0.0000 | 0.0000 | 0.0000 | 0.0000 | 0.0000 |
| IMPACT_P186_F | 0.0000 | 0.0000 | 0.0000 | 0.0000 | 0.0000 | 0.0000 | 0.0000 | 0.0007 | 0.0000 | 0.0000 | 0.0000 | 0.0000 | 0.0000 | 0.0000 | 0.0000 |
| IMPACT_P234_R | 0.0000 | 0.0000 | 0.0000 | 0.0000 | 0.0000 | 0.0000 | 0.0046 | 0.0054 | 0.0025 | 0.0012 | 0.0000 | 0.0000 | 0.0011 | 0.0000 | 0.0000 |
| INSR_P1063_R  | 0.0000 | 0.0000 | 0.0068 | 0.0000 | 0.0000 | 0.0000 | 0.0000 | 0.0000 | 0.0010 | 0.0000 | 0.0000 | 0.0000 | 0.0000 | 0.0000 | 0.0000 |
| IPF1_P234_F   | 0.0000 | 0.9908 | 0.0000 | 0.0000 | 0.0000 | 0.0000 | 0.0000 | 0.0035 | 0.0089 | 0.0000 | 0.0000 | 0.0064 | 0.0020 | 0.0042 | 0.0000 |
| IRAK1_P455_R  | 0.0068 | 0.0054 | 0.0042 | 0.0000 | 0.0651 | 0.0000 | 0.0253 | 0.1051 | 0.0106 | 0.0054 | 0.0023 | 0.0141 | 0.5318 | 0.0092 | 0.3849 |
| IRAK3_E130_F  | 0.0123 | 0.0000 | 0.0086 | 0.0000 | 0.0103 | 0.0000 | 0.4078 | 0.0101 | 0.0169 | 0.0086 | 0.0100 | 0.0101 | 0.0061 | 0.0226 | 0.0000 |
| IRAK3_P13_F   | 0.0104 | 0.0076 | 0.2489 | 0.0000 | 0.0000 | 0.0424 | 0.0000 | 0.0000 | 0.0097 | 0.0000 | 0.0000 | 0.0137 | 0.0052 | 0.0020 | 0.0000 |
| IRF5_P123_F   | 0.0156 | 0.0114 | 0.0164 | 0.0000 | 0.0472 | 0.0025 | 0.0030 | 0.0119 | 0.0116 | 0.0121 | 0.0056 | 0.6649 | 0.0118 | 0.0085 | 0.0000 |
| IRF7_P277_R   | 0.5856 | 0.0675 | 0.0179 | 0.1016 | 0.0093 | 0.2261 | 0.1778 | 0.0166 | 0.0167 | 0.0197 | 0.0128 | 0.0712 | 0.0227 | 0.0144 | 0.0055 |
| ISL1_E87_R    | 0.0071 | 0.0000 | 0.0036 | 0.0000 | 0.0000 | 0.0000 | 0.0075 | 0.0106 | 0.0060 | 0.0000 | 0.0056 | 0.0000 | 0.0021 | 0.0034 | 0.0000 |
| ISL1_P379_F   | 0.0042 | 0.0060 | 0.0049 | 0.0000 | 0.3435 | 0.0056 | 0.0116 | 0.0111 | 0.0041 | 0.0000 | 0.0000 | 0.0000 | 0.0000 | 0.0025 | 0.0000 |
| ISL1_P554_F   | 0.0000 | 0.0027 | 0.0001 | 0.0000 | 0.0000 | 0.0000 | 0.0000 | 0.0000 | 0.0000 | 0.0000 | 0.0000 | 0.0000 | 0.0000 | 0.0000 | 0.0000 |
| ITGA2_E120_F  | 0.0069 | 0.0000 | 0.0059 | 0.0000 | 0.0042 | 0.3232 | 0.0072 | 0.0178 | 0.0100 | 0.0090 | 0.0070 | 0.0242 | 0.0076 | 0.0088 | 0.0000 |
| ITGA2_P26_R   | 0.0000 | 0.0000 | 0.0000 | 0.0000 | 0.0046 | 0.0000 | 0.0000 | 0.0024 | 0.0003 | 0.0000 | 0.0051 | 0.0000 | 0.0055 | 0.0000 | 0.0000 |
| ITGB4_E144_F  | 0.0326 | 0.0092 | 0.0106 | 0.0000 | 0.0000 | 0.0000 | 0.0000 | 0.0096 | 0.0064 | 0.0116 | 0.0000 | 0.0098 | 0.0072 | 0.0010 | 0.0000 |
| ITGB4_P517_F  | 0.0000 | 0.0000 | 0.0000 | 0.0000 | 0.0000 | 0.0000 | 0.0000 | 0.0000 | 0.5730 | 0.0000 | 0.0000 | 0.4839 | 0.0000 | 0.0000 | 0.0000 |
| ITPR3_E86_R   | 0.0041 | 0.0078 | 0.0000 | 0.0000 | 0.0000 | 0.0035 | 0.0000 | 0.0000 | 0.0000 | 0.0000 | 0.0000 | 0.0052 | 0.0032 | 0.0000 | 0.0000 |
| ITPR3_P1112_F | 0.0048 | 0.0029 | 0.0000 | 0.0000 | 0.0015 | 0.0000 | 0.0063 | 0.0000 | 0.0002 | 0.0055 | 0.0000 | 0.0051 | 0.0013 | 0.0016 | 0.5554 |
| JAG2_E54_F    | 0.0063 | 0.0000 | 0.0044 | 0.0000 | 0.0058 | 0.0000 | 0.0714 | 0.0089 | 0.0086 | 0.0000 | 0.0131 | 0.0290 | 0.0056 | 0.0043 | 0.0000 |
| JAG2_P264_F   | 0.3990 | 0.0000 | 0.0745 | 0.0000 | 0.5653 | 0.0000 | 0.2550 | 0.3992 | 0.0183 | 0.1812 | 0.0107 | 0.3580 | 0.1607 | 0.2260 | 0.0000 |
| JAK2_P772_R   | 0.0172 | 0.2162 | 0.0117 | 0.0000 | 0.2192 | 0.2150 | 0.0140 | 0.0213 | 0.0175 | 0.0155 | 0.1287 | 0.0140 | 0.0936 | 0.1841 | 0.0000 |
| JAK3_E64_F    | 0.0000 | 0.0000 | 0.0082 | 0.0000 | 0.0064 | 0.0000 | 0.0000 | 0.0071 | 0.0079 | 0.0000 | 0.0066 | 0.0064 | 0.0000 | 0.0516 | 0.0000 |
| JAK3_P156_R   | 0.1330 | 0.0737 | 0.0102 | 0.0000 | 0.3215 | 0.1568 | 0.1317 | 0.0114 | 0.0132 | 0.0157 | 0.0084 | 0.3173 | 0.0128 | 0.0113 | 0.0000 |
| JUNB_P1149_R  | 0.9739 | 0.1147 | 0.0955 | 0.4068 | 0.5221 | 0.5069 | 0.6106 | 0.2396 | 0.0744 | 0.1367 | 0.0703 | 0.6646 | 0.1045 | 0.0786 | 0.1043 |
| KCNK4_E3_F    | 0.0201 | 0.0047 | 0.0035 | 0.0000 | 0.0000 | 0.0000 | 0.0038 | 0.0163 | 0.0060 | 0.9109 | 0.0017 | 0.0058 | 0.0066 | 0.9443 | 0.0000 |
| KDR_E79_F     | 0.8027 | 0.8160 | 0.7832 | 0.5954 | 0.7768 | 0.7895 | 0.7874 | 0.0352 | 0.0212 | 0.7580 | 0.0183 | 0.0226 | 0.0286 | 0.0322 | 0.0012 |
| KDR_P445_R    | 0.0103 | 0.0107 | 0.0071 | 0.0000 | 0.0056 | 0.0000 | 0.0000 | 0.0099 | 0.0029 | 0.0079 | 0.0000 | 0.0000 | 0.0140 | 0.0059 | 0.0000 |

|                 |        |        |        |        |        |        |        |        |        |        |        |        |        |        |        |
|-----------------|--------|--------|--------|--------|--------|--------|--------|--------|--------|--------|--------|--------|--------|--------|--------|
| KIAA1804_P689_R | 0.1131 | 0.1127 | 0.0080 | 0.0000 | 0.3394 | 0.0961 | 0.1100 | 0.0079 | 0.0114 | 0.0846 | 0.1413 | 0.1065 | 0.0073 | 0.3031 | 0.0000 |
| KIT_P367_R      | 0.0057 | 0.0000 | 0.2100 | 0.0293 | 0.0000 | 0.0000 | 0.0012 | 0.0000 | 0.0075 | 0.0000 | 0.0057 | 0.0046 | 0.0000 | 0.0038 | 0.0000 |
| KIT_P405_F      | 0.5997 | 0.0049 | 0.0038 | 0.0000 | 0.0000 | 0.0000 | 0.0062 | 0.1358 | 0.2316 | 0.0094 | 0.0082 | 0.0086 | 0.6727 | 0.0094 | 0.0000 |
| KLF5_E190_R     | 0.0000 | 0.0000 | 0.0027 | 0.0000 | 0.0007 | 0.0024 | 0.0000 | 0.0046 | 0.0033 | 0.0000 | 0.0047 | 0.0034 | 0.0000 | 0.0025 | 0.0000 |
| KLK11_P103_R    | 0.0000 | 0.0000 | 0.9161 | 0.0000 | 0.0000 | 0.0000 | 0.0000 | 0.0003 | 0.9740 | 0.0000 | 0.0000 | 0.9868 | 0.0000 | 0.9797 | 0.7525 |
| KLK11_P1290_F   | 0.0066 | 0.0000 | 0.0000 | 0.0000 | 0.9893 | 0.0000 | 0.9875 | 0.0079 | 0.9540 | 0.0000 | 0.0000 | 0.9912 | 0.0000 | 0.9797 | 0.9699 |
| KRAS_E82_F      | 0.0082 | 0.0039 | 0.4566 | 0.0000 | 0.0000 | 0.0000 | 0.4987 | 0.8287 | 0.4765 | 0.0000 | 0.0113 | 0.0154 | 0.0625 | 0.5821 | 0.4866 |
| KRAS_P651_F     | 0.4254 | 0.1413 | 0.1281 | 0.1631 | 0.3892 | 0.4415 | 0.0946 | 0.0904 | 0.1756 | 0.1975 | 0.4459 | 0.2091 | 0.5116 | 0.3502 | 0.1582 |
| KRT13_P341_R    | 0.9934 | 0.0000 | 0.0000 | 0.0000 | 0.9902 | 0.0000 | 0.9912 | 0.8958 | 0.9844 | 0.0000 | 0.9911 | 0.0071 | 0.0000 | 0.8710 | 0.9319 |
| KRT5_P308_F     | 0.1569 | 0.1957 | 0.3226 | 0.7372 | 0.9622 | 0.2523 | 0.9456 | 0.2370 | 0.8563 | 0.2592 | 0.2440 | 0.9354 | 0.2066 | 0.2648 | 0.6496 |
| L1CAM_P148_R    | 0.0000 | 0.0070 | 0.0000 | 0.3780 | 0.0425 | 0.0000 | 0.0149 | 0.0069 | 0.0034 | 0.0075 | 0.0000 | 0.0088 | 0.0090 | 0.0026 | 0.0000 |
| L1CAM_P19_F     | 0.0000 | 0.0000 | 0.0026 | 0.0000 | 0.0000 | 0.0000 | 0.0000 | 0.6866 | 0.0064 | 0.0000 | 0.0342 | 0.0000 | 0.0000 | 0.0030 | 0.5332 |
| LAMC1_E466_R    | 0.0000 | 0.0068 | 0.0045 | 0.0000 | 0.0041 | 0.0000 | 0.0092 | 0.0052 | 0.0028 | 0.0000 | 0.0345 | 0.0094 | 0.0155 | 0.0013 | 0.0000 |
| LIF_E208_F      | 0.0126 | 0.2736 | 0.0089 | 0.0000 | 0.2888 | 0.3124 | 0.3374 | 0.2569 | 0.0091 | 0.1741 | 0.2214 | 0.0091 | 0.0289 | 0.0107 | 0.0000 |
| LIF_P383_R      | 0.0000 | 0.0000 | 0.0000 | 0.0000 | 0.0000 | 0.0000 | 0.2163 | 0.0000 | 0.6447 | 0.0060 | 0.0000 | 0.0000 | 0.6279 | 0.0189 | 0.1926 |
| LIG4_P194_F     | 0.0095 | 0.0000 | 0.0001 | 0.0000 | 0.0087 | 0.0000 | 0.0572 | 0.0000 | 0.0132 | 0.0000 | 0.0000 | 0.0000 | 0.0088 | 0.0115 | 0.0000 |
| LMO1_E265_R     | 0.0029 | 0.0000 | 0.0007 | 0.0000 | 0.0056 | 0.0037 | 0.0000 | 0.0020 | 0.0040 | 0.0000 | 0.0000 | 0.0005 | 0.0000 | 0.5726 | 0.0000 |
| LMO1_P169_F     | 0.0000 | 0.0000 | 0.0000 | 0.0000 | 0.0040 | 0.0000 | 0.0057 | 0.0098 | 0.0069 | 0.0000 | 0.0000 | 0.0000 | 0.0051 | 0.0067 | 0.0000 |
| LOX_P313_R      | 0.0256 | 0.0597 | 0.2060 | 0.0123 | 0.0119 | 0.1463 | 0.0667 | 0.0155 | 0.2105 | 0.0524 | 0.0963 | 0.0243 | 0.1295 | 0.0252 | 0.0000 |
| LOX_P71_F       | 0.0049 | 0.0000 | 0.0038 | 0.0000 | 0.0053 | 0.0000 | 0.0024 | 0.0071 | 0.0047 | 0.0070 | 0.0000 | 0.0000 | 0.0047 | 0.0000 | 0.0000 |
| LRP2_E20_F      | 0.0407 | 0.5413 | 0.0351 | 0.9652 | 0.0677 | 0.6900 | 0.0512 | 0.0500 | 0.0348 | 0.0385 | 0.0288 | 0.0352 | 0.4922 | 0.0304 | 0.0047 |
| LRRC32_P865_R   | 0.0086 | 0.0000 | 0.0000 | 0.6420 | 0.0055 | 0.0000 | 0.0000 | 0.0082 | 0.0132 | 0.0000 | 0.0071 | 0.0000 | 0.0000 | 0.0214 | 0.0000 |
| LTB4R_E64_R     | 0.0337 | 0.0790 | 0.6020 | 0.0000 | 0.9843 | 0.4647 | 0.0226 | 0.0307 | 0.0311 | 0.0290 | 0.4797 | 0.0961 | 0.0408 | 0.5620 | 0.0375 |
| LYN_E353_F      | 0.0000 | 0.0062 | 0.0000 | 0.0000 | 0.0000 | 0.0000 | 0.0000 | 0.0000 | 0.0000 | 0.0000 | 0.0012 | 0.9791 | 0.0028 | 0.0000 | 0.0000 |
| LYN_P241_F      | 0.2923 | 0.3963 | 0.0383 | 0.0920 | 0.0437 | 0.3017 | 0.2993 | 0.0784 | 0.0399 | 0.0585 | 0.2572 | 0.0532 | 0.0646 | 0.0464 | 0.0257 |
| MAF_P826_R      | 0.0000 | 0.0000 | 0.0000 | 0.0000 | 0.0000 | 0.0000 | 0.0000 | 0.0000 | 0.0000 | 0.0000 | 0.0000 | 0.0020 | 0.0102 | 0.0000 | 0.0000 |
| MAGEC3_P903_F   | 0.0000 | 0.0599 | 0.0000 | 0.0000 | 0.0000 | 0.2323 | 0.0000 | 0.0000 | 0.0035 | 0.0000 | 0.0000 | 0.0000 | 0.0080 | 0.0000 | 0.0000 |
| MAGEL2_E166_R   | 0.0000 | 0.0000 | 0.0000 | 0.0136 | 0.0000 | 0.0000 | 0.0000 | 0.0000 | 0.9781 | 0.0000 | 0.0000 | 0.0000 | 0.0000 | 0.9589 | 0.0000 |
| MALT1_P406_R    | 0.0000 | 0.0038 | 0.0025 | 0.0000 | 0.0047 | 0.0000 | 0.0058 | 0.0046 | 0.0076 | 0.0000 | 0.0069 | 0.0141 | 0.0000 | 0.0000 | 0.0000 |
| MAP2K6_E297_F   | 0.0000 | 0.0012 | 0.0015 | 0.0000 | 0.0000 | 0.0056 | 0.0057 | 0.0001 | 0.0010 | 0.0000 | 0.0052 | 0.0021 | 0.0007 | 0.7481 | 0.0000 |
| MAP2K6_P297_R   | 0.0201 | 0.1155 | 0.0103 | 0.0000 | 0.2861 | 0.1346 | 0.0121 | 0.0122 | 0.0132 | 0.1312 | 0.0116 | 0.0151 | 0.0125 | 0.0088 | 0.0000 |
| MAP3K1_P7_F     | 0.2954 | 0.2272 | 0.1791 | 0.4734 | 0.7477 | 0.0055 | 0.3581 | 0.3600 | 0.0335 | 0.0130 | 0.0314 | 0.0249 | 0.6227 | 0.0245 | 0.0000 |
| MAP3K9_E17_R    | 0.3613 | 0.0000 | 0.0000 | 0.0000 | 0.2383 | 0.0000 | 0.0000 | 0.0171 | 0.0293 | 0.0000 | 0.1549 | 0.0000 | 0.0029 | 0.0265 | 0.0000 |



|                    |        |        |        |        |        |        |        |        |        |        |        |        |        |        |        |
|--------------------|--------|--------|--------|--------|--------|--------|--------|--------|--------|--------|--------|--------|--------|--------|--------|
| MAPK12_E165_R      | 0.1108 | 0.1256 | 0.0000 | 0.0000 | 0.0034 | 0.3776 | 0.0000 | 0.0108 | 0.0086 | 0.0123 | 0.0057 | 0.0089 | 0.0090 | 0.0068 | 0.0000 |
| MAPK12_P416_F      | 0.0000 | 0.0000 | 0.0000 | 0.0000 | 0.0000 | 0.0000 | 0.0050 | 0.0029 | 0.0000 | 0.0000 | 0.0000 | 0.0059 | 0.0033 | 0.0004 | 0.0000 |
| MAPK14_P327_R      | 0.0000 | 0.0887 | 0.0010 | 0.0000 | 0.0053 | 0.0000 | 0.0099 | 0.0297 | 0.0044 | 0.0049 | 0.0000 | 0.2309 | 0.1855 | 0.0064 | 0.0000 |
| MAPK4_E273_R       | 0.0000 | 0.0000 | 0.0031 | 0.0000 | 0.0000 | 0.9965 | 0.0000 | 0.0000 | 0.9819 | 0.0000 | 0.9940 | 0.0013 | 0.0026 | 0.5651 | 0.8260 |
| MAPK9_P1175_F      | 0.0000 | 0.0000 | 0.9933 | 0.0000 | 0.0000 | 0.0000 | 0.0000 | 0.8493 | 0.9805 | 0.0000 | 0.0443 | 0.0000 | 0.0000 | 0.9810 | 0.9722 |
| MAS1_P469_R        | 0.8212 | 0.3808 | 0.6694 | 0.1516 | 0.9889 | 0.9790 | 0.1479 | 0.9889 | 0.9825 | 0.6081 | 0.9926 | 0.6680 | 0.0208 | 0.9851 | 0.9785 |
| MATK_P64_F         | 0.0073 | 0.0701 | 0.0689 | 0.0678 | 0.0051 | 0.0237 | 0.0059 | 0.0096 | 0.0097 | 0.0083 | 0.0086 | 0.0462 | 0.0530 | 0.0034 | 0.0000 |
| MC2R_P1025_F       | 0.0000 | 0.0000 | 0.0000 | 0.0000 | 0.0000 | 0.0000 | 0.6729 | 0.0000 | 0.9555 | 0.0000 | 0.0000 | 0.0000 | 0.0000 | 0.0000 | 0.0000 |
| MCAM_P169_R        | 0.0104 | 0.0045 | 0.0000 | 0.0000 | 0.0051 | 0.0000 | 0.0000 | 0.0123 | 0.0061 | 0.0238 | 0.0056 | 0.0000 | 0.0040 | 0.0071 | 0.0000 |
| MCAM_P265_R        | 0.0328 | 0.0662 | 0.1447 | 0.0000 | 0.0083 | 0.0519 | 0.0438 | 0.6540 | 0.0203 | 0.0104 | 0.0089 | 0.0214 | 0.0293 | 0.0290 | 0.5526 |
| MCC_P196_R         | 0.0000 | 0.0000 | 0.0000 | 0.0000 | 0.0000 | 0.0000 | 0.0000 | 0.0000 | 0.0000 | 0.0000 | 0.0015 | 0.0000 | 0.0035 | 0.0000 | 0.0000 |
| MCM2_P241_R        | 0.1870 | 0.0094 | 0.0077 | 0.0761 | 0.0079 | 0.4389 | 0.0111 | 0.0091 | 0.0087 | 0.0135 | 0.0101 | 0.0095 | 0.0114 | 0.0047 | 0.0000 |
| MDR1_seq_42_S300_R | 0.0118 | 0.0066 | 0.0099 | 0.0000 | 0.0060 | 0.0406 | 0.0073 | 0.0107 | 0.0054 | 0.0095 | 0.0097 | 0.0086 | 0.0074 | 0.0088 | 0.0000 |
| MDS1_E45_F         | 0.0056 | 0.0000 | 0.0055 | 0.0000 | 0.0000 | 0.0000 | 0.3079 | 0.0125 | 0.0201 | 0.0000 | 0.2448 | 0.0094 | 0.0371 | 0.0042 | 0.0000 |
| MECP2_E90_R        | 0.0067 | 0.0094 | 0.6858 | 0.0000 | 0.0042 | 0.0064 | 0.0054 | 0.0120 | 0.0083 | 0.0125 | 0.0033 | 0.0093 | 0.0065 | 0.2039 | 0.0000 |
| MEG3_E91_F         | 0.0065 | 0.0000 | 0.9889 | 0.3898 | 0.0063 | 0.0000 | 0.0217 | 0.0000 | 0.0032 | 0.0000 | 0.0000 | 0.0000 | 0.0028 | 0.0000 | 0.0000 |
| MEST_E150_F        | 0.0003 | 0.0000 | 0.0011 | 0.0000 | 0.0019 | 0.0000 | 0.0004 | 0.0044 | 0.0000 | 0.0054 | 0.0000 | 0.0024 | 0.0000 | 0.0029 | 0.0000 |
| MEST_P4_F          | 0.0000 | 0.0000 | 0.0081 | 0.0000 | 0.0008 | 0.0000 | 0.0013 | 0.0039 | 0.0037 | 0.0029 | 0.0000 | 0.0014 | 0.0032 | 0.0005 | 0.0000 |
| MEST_P62_R         | 0.0001 | 0.0000 | 0.0000 | 0.0000 | 0.0000 | 0.0112 | 0.5115 | 0.0062 | 0.0000 | 0.0000 | 0.0000 | 0.0094 | 0.0040 | 0.0009 | 0.0000 |
| MET_E333_F         | 0.0352 | 0.0000 | 0.5871 | 0.6686 | 0.0000 | 0.0000 | 0.9924 | 0.5071 | 0.0147 | 0.0146 | 0.0126 | 0.0142 | 0.3287 | 0.0242 | 0.0000 |
| MFAP4_P197_F       | 0.0028 | 0.0000 | 0.0039 | 0.0000 | 0.0000 | 0.0000 | 0.0000 | 0.0035 | 0.0007 | 0.0000 | 0.0063 | 0.0000 | 0.0049 | 0.0000 | 0.0000 |
| MGMT_P272_R        | 0.0000 | 0.0000 | 0.0036 | 0.0000 | 0.0000 | 0.0000 | 0.0000 | 0.0000 | 0.0036 | 0.0000 | 0.0054 | 0.0042 | 0.0000 | 0.0000 | 0.0000 |
| MGMT_P281_F        | 0.0104 | 0.5668 | 0.0131 | 0.8867 | 0.4812 | 0.7048 | 0.4919 | 0.0118 | 0.0179 | 0.0179 | 0.0150 | 0.0193 | 0.0144 | 0.0266 | 0.0000 |
| MKRN3_P108_F       | 0.0000 | 0.9927 | 0.0000 | 0.0000 | 0.9879 | 0.0000 | 0.0219 | 0.3858 | 0.5242 | 0.0000 | 0.9836 | 0.0000 | 0.0000 | 0.9693 | 0.9822 |
| MLF1_P97_F         | 0.0095 | 0.0000 | 0.0053 | 0.0287 | 0.1465 | 0.0050 | 0.0000 | 0.0076 | 0.0091 | 0.0113 | 0.0000 | 0.0097 | 0.0067 | 0.0050 | 0.0000 |
| MLH1_P381_F        | 0.3441 | 0.2120 | 0.3637 | 0.0000 | 0.3367 | 0.0000 | 0.0105 | 0.0084 | 0.0119 | 0.0000 | 0.3587 | 0.0090 | 0.0081 | 0.1298 | 0.0000 |
| MLH3_E72_F         | 0.0000 | 0.1112 | 0.0040 | 0.0000 | 0.0000 | 0.0000 | 0.0067 | 0.0054 | 0.0060 | 0.0000 | 0.0034 | 0.0000 | 0.0000 | 0.0002 | 0.0000 |
| MLH3_P25_F         | 0.3636 | 0.0000 | 0.7411 | 0.0000 | 0.6454 | 0.0000 | 0.0000 | 0.2053 | 0.0060 | 0.0028 | 0.7923 | 0.0034 | 0.0029 | 0.4638 | 0.0818 |
| MLLT3_E93_R        | 0.0048 | 0.0000 | 0.0000 | 0.0000 | 0.0000 | 0.0000 | 0.0044 | 0.0000 | 0.0000 | 0.0000 | 0.0088 | 0.0071 | 0.0000 | 0.0000 | 0.0000 |
| MLLT4_P1400_F      | 0.1332 | 0.1987 | 0.0118 | 0.8161 | 0.0135 | 0.1902 | 0.2125 | 0.0184 | 0.0192 | 0.0159 | 0.1624 | 0.0210 | 0.1582 | 0.0182 | 0.0000 |
| MLLT6_P957_F       | 0.0049 | 0.0000 | 0.0053 | 0.0000 | 0.0000 | 0.0000 | 0.0000 | 0.0132 | 0.0011 | 0.0059 | 0.0000 | 0.0034 | 0.0000 | 0.0009 | 0.0000 |
| MME_E29_F          | 0.0000 | 0.0000 | 0.0016 | 0.0000 | 0.0053 | 0.3531 | 0.0000 | 0.0082 | 0.0063 | 0.0000 | 0.0000 | 0.0000 | 0.0050 | 0.0000 | 0.0000 |
| MME_P388_F         | 0.0000 | 0.0000 | 0.0000 | 0.0000 | 0.0000 | 0.0000 | 0.0000 | 0.6487 | 0.0000 | 0.0000 | 0.0058 | 0.0000 | 0.0000 | 0.0000 | 0.0000 |

|              |        |        |        |        |        |        |        |        |        |        |        |        |        |        |        |        |
|--------------|--------|--------|--------|--------|--------|--------|--------|--------|--------|--------|--------|--------|--------|--------|--------|--------|
| MMP19_E274_R | 0.0000 | 0.9950 | 0.0000 | 0.0000 | 0.0000 | 0.0000 | 0.0000 | 0.0000 | 0.7876 | 0.9535 | 0.9923 | 0.7789 | 0.7762 | 0.9894 | 0.7422 | 0.9323 |
| MMP2_E21_R   | 0.0033 | 0.0000 | 0.0000 | 0.0000 | 0.0046 | 0.0000 | 0.0071 | 0.0030 | 0.0057 | 0.0064 | 0.0000 | 0.0082 | 0.0007 | 0.0040 | 0.0000 |        |
| MMP2_P197_F  | 0.0066 | 0.0092 | 0.0070 | 0.4922 | 0.0000 | 0.0043 | 0.0000 | 0.0092 | 0.0097 | 0.0000 | 0.0080 | 0.0000 | 0.0000 | 0.0060 | 0.0000 |        |
| MMP2_P303_R  | 0.0567 | 0.3453 | 0.0116 | 0.0000 | 0.3025 | 0.2204 | 0.3767 | 0.0114 | 0.0102 | 0.0109 | 0.0111 | 0.0136 | 0.0110 | 0.0224 | 0.0000 |        |
| MMP3_P16_R   | 0.0000 | 0.9932 | 0.0000 | 0.0000 | 0.9874 | 0.0000 | 0.9917 | 0.9815 | 0.8487 | 0.0000 | 0.0000 | 0.9875 | 0.0000 | 0.6880 | 0.9877 |        |
| MMP7_P613_F  | 0.0284 | 0.0748 | 0.9117 | 0.0718 | 0.9927 | 0.9641 | 0.1879 | 0.7847 | 0.9330 | 0.9323 | 0.0381 | 0.7074 | 0.1968 | 0.8011 | 0.8846 |        |
| MMP9_P189_F  | 0.0000 | 0.0000 | 0.0000 | 0.0000 | 0.0000 | 0.0000 | 0.0076 | 0.0098 | 0.0137 | 0.0090 | 0.0079 | 0.4235 | 0.0000 | 0.8683 | 0.0000 |        |
| MMP9_P237_R  | 0.3190 | 0.0000 | 0.0073 | 0.3875 | 0.5569 | 0.4137 | 0.1340 | 0.0052 | 0.0104 | 0.0088 | 0.0053 | 0.0067 | 0.0159 | 0.0118 | 0.0000 |        |
| MOS_E60_R    | 0.0331 | 0.0762 | 0.0093 | 0.0000 | 0.0066 | 0.1040 | 0.0000 | 0.0097 | 0.6429 | 0.0089 | 0.0449 | 0.0108 | 0.0067 | 0.0069 | 0.0000 |        |
| MPO_P883_R   | 0.0000 | 0.0000 | 0.0041 | 0.0000 | 0.0020 | 0.0000 | 0.0000 | 0.0074 | 0.0054 | 0.0071 | 0.0000 | 0.0055 | 0.0046 | 0.0041 | 0.3968 |        |
| MSH3_E3_F    | 0.0192 | 0.0286 | 0.9814 | 0.0000 | 0.0000 | 0.9894 | 0.0000 | 0.8470 | 0.9858 | 0.0000 | 0.7844 | 0.8763 | 0.0000 | 0.7695 | 0.9632 |        |
| MSH3_P13_R   | 0.0174 | 0.9938 | 0.8584 | 0.2153 | 0.0382 | 0.0128 | 0.7462 | 0.7065 | 0.8312 | 0.8400 | 0.7991 | 0.5069 | 0.0157 | 0.6950 | 0.8118 |        |
| MST1R_P392_F | 0.0000 | 0.0000 | 0.0000 | 0.0000 | 0.0023 | 0.0000 | 0.0007 | 0.0000 | 0.0016 | 0.0041 | 0.0000 | 0.0000 | 0.0000 | 0.0000 | 0.0000 |        |
| MT1A_E13_R   | 0.0183 | 0.1558 | 0.0092 | 0.0000 | 0.1918 | 0.0127 | 0.0091 | 0.0098 | 0.0082 | 0.0089 | 0.0188 | 0.0100 | 0.0085 | 0.1693 | 0.0000 |        |
| MT1A_P49_R   | 0.0013 | 0.0034 | 0.0000 | 0.0000 | 0.0000 | 0.0000 | 0.0000 | 0.0000 | 0.0000 | 0.0028 | 0.0002 | 0.0000 | 0.0009 | 0.0000 | 0.0000 |        |
| MTA1_P478_F  | 0.1064 | 0.0069 | 0.0076 | 0.3719 | 0.0082 | 0.1988 | 0.0096 | 0.4776 | 0.0130 | 0.1084 | 0.0891 | 0.0106 | 0.0905 | 0.0108 | 0.2706 |        |
| MUC1_E18_R   | 0.9767 | 0.0000 | 0.1210 | 0.0000 | 0.0000 | 0.0000 | 0.0000 | 0.0370 | 0.9309 | 0.0294 | 0.0000 | 0.0000 | 0.0000 | 0.0000 | 0.0000 |        |
| MUC1_P191_F  | 0.0000 | 0.0000 | 0.0000 | 0.0000 | 0.0028 | 0.0000 | 0.0000 | 0.0055 | 0.0000 | 0.0000 | 0.0000 | 0.0105 | 0.0053 | 0.0139 | 0.0000 |        |
| MXI1_P75_R   | 0.0071 | 0.0068 | 0.0047 | 0.0034 | 0.0028 | 0.0057 | 0.0103 | 0.0053 | 0.0063 | 0.0096 | 0.0049 | 0.0102 | 0.0049 | 0.0047 | 0.0000 |        |
| MYBL2_P211_F | 0.0000 | 0.0079 | 0.0031 | 0.0000 | 0.2935 | 0.0038 | 0.0000 | 0.0110 | 0.0067 | 0.0000 | 0.0060 | 0.0000 | 0.0154 | 0.0109 | 0.0000 |        |
| MYCL1_P502_R | 0.0000 | 0.0083 | 0.0000 | 0.0000 | 0.0034 | 0.0000 | 0.0104 | 0.0000 | 0.0034 | 0.0000 | 0.0066 | 0.0035 | 0.0041 | 0.0040 | 0.0000 |        |
| MYCN_E77_R   | 0.0149 | 0.0141 | 0.0242 | 0.0000 | 0.0738 | 0.0179 | 0.0082 | 0.0166 | 0.3192 | 0.0170 | 0.0031 | 0.0096 | 0.0114 | 0.0075 | 0.0000 |        |
| MYCN_P464_R  | 0.0091 | 0.0063 | 0.0026 | 0.0000 | 0.0000 | 0.0103 | 0.0000 | 0.0063 | 0.0051 | 0.0000 | 0.0067 | 0.0052 | 0.1180 | 0.0065 | 0.0000 |        |
| MYH11_P22_F  | 0.0000 | 0.0065 | 0.0044 | 0.0000 | 0.0030 | 0.0000 | 0.0051 | 0.0855 | 0.0093 | 0.0092 | 0.0110 | 0.0083 | 0.0913 | 0.0040 | 0.6164 |        |
| MYH11_P236_R | 0.0000 | 0.0046 | 0.0000 | 0.0000 | 0.0000 | 0.0000 | 0.0000 | 0.0000 | 0.0000 | 0.0000 | 0.0004 | 0.0002 | 0.0029 | 0.0023 | 0.0000 |        |
| MYLK_P469_R  | 0.9905 | 0.0091 | 0.0072 | 0.6713 | 0.3716 | 0.4965 | 0.3149 | 0.0141 | 0.2082 | 0.0199 | 0.0094 | 0.0150 | 0.0069 | 0.0083 | 0.0000 |        |
| MYOD1_E156_F | 0.9920 | 0.0052 | 0.0008 | 0.0000 | 0.0317 | 0.0010 | 0.0000 | 0.0000 | 0.0043 | 0.0042 | 0.0000 | 0.0033 | 0.0000 | 0.0000 | 0.0000 |        |
| MYOD1_P50_F  | 0.0000 | 0.0000 | 0.0000 | 0.0000 | 0.0000 | 0.0000 | 0.0000 | 0.0000 | 0.0000 | 0.0000 | 0.0054 | 0.0034 | 0.0000 | 0.0000 | 0.0000 |        |
| NBL1_E205_R  | 0.9203 | 0.9252 | 0.8667 | 0.9885 | 0.9930 | 0.9527 | 0.0483 | 0.9872 | 0.8969 | 0.9167 | 0.0691 | 0.9901 | 0.8694 | 0.9825 | 0.6581 |        |
| NBL1_P24_F   | 0.0831 | 0.9935 | 0.9864 | 0.0000 | 0.9836 | 0.9838 | 0.9865 | 0.0085 | 0.5822 | 0.9939 | 0.0000 | 0.7168 | 0.0076 | 0.9854 | 0.9727 |        |
| NCL_P840_R   | 0.0055 | 0.0000 | 0.0000 | 0.0000 | 0.0052 | 0.4537 | 0.0000 | 0.0156 | 0.0144 | 0.0132 | 0.0060 | 0.0096 | 0.0020 | 0.0221 | 0.0000 |        |
| NDN_P1110_F  | 0.0000 | 0.0000 | 0.0000 | 0.0000 | 0.9887 | 0.0000 | 0.0000 | 0.9812 | 0.7412 | 0.8695 | 0.5902 | 0.9820 | 0.0000 | 0.9660 | 0.9079 |        |
| NEFL_E23_R   | 0.9055 | 0.6334 | 0.9936 | 0.9994 | 0.8487 | 0.9921 | 0.9961 | 0.9733 | 0.9218 | 0.9966 | 0.9947 | 0.9961 | 0.9963 | 0.9159 | 0.9859 |        |

|                |        |        |        |        |        |        |        |        |        |        |        |        |        |        |        |
|----------------|--------|--------|--------|--------|--------|--------|--------|--------|--------|--------|--------|--------|--------|--------|--------|
| NEFL_P209_R    | 0.0142 | 0.0000 | 0.0012 | 0.0000 | 0.0000 | 0.0000 | 0.0000 | 0.0000 | 0.0020 | 0.0000 | 0.0040 | 0.0011 | 0.0000 | 0.0000 | 0.0000 |
| NEO1_P1067_F   | 0.0000 | 0.0000 | 0.0000 | 0.0000 | 0.0000 | 0.0000 | 0.0000 | 0.0000 | 0.0000 | 0.0000 | 0.0000 | 0.0000 | 0.0000 | 0.0000 | 0.0042 |
| NES_P239_R     | 0.9830 | 0.0494 | 0.0039 | 0.0000 | 0.0017 | 0.0092 | 0.0000 | 0.0000 | 0.0000 | 0.0063 | 0.0000 | 0.0000 | 0.0308 | 0.0000 | 0.0034 |
| NEU1_P745_F    | 0.0570 | 0.0000 | 0.0000 | 0.0000 | 0.0000 | 0.0000 | 0.0000 | 0.0000 | 0.0087 | 0.0042 | 0.0000 | 0.0000 | 0.0072 | 0.0045 | 0.0068 |
| NFKB1_P336_R   | 0.0000 | 0.0000 | 0.2492 | 0.0000 | 0.0144 | 0.5676 | 0.0000 | 0.2337 | 0.0850 | 0.0000 | 0.0254 | 0.0000 | 0.0000 | 0.0163 | 0.0000 |
| NFKB2_P709_R   | 0.2090 | 0.0087 | 0.0196 | 0.0000 | 0.0094 | 0.2057 | 0.0098 | 0.0322 | 0.0256 | 0.0216 | 0.1397 | 0.0128 | 0.0314 | 0.0252 | 0.0000 |
| NGFB_E353_F    | 0.0049 | 0.0037 | 0.0000 | 0.0000 | 0.0018 | 0.0000 | 0.0059 | 0.0015 | 0.6058 | 0.0000 | 0.0000 | 0.0044 | 0.0050 | 0.0019 | 0.0000 |
| NGFB_P13_F     | 0.8275 | 0.0171 | 0.2062 | 0.4715 | 0.8820 | 0.3154 | 0.3756 | 0.3457 | 0.0954 | 0.0506 | 0.1652 | 0.2525 | 0.0506 | 0.0358 | 0.0254 |
| NGFR_E328_F    | 0.0000 | 0.0000 | 0.0041 | 0.0000 | 0.0024 | 0.0000 | 0.0049 | 0.0060 | 0.0067 | 0.0080 | 0.0000 | 0.0044 | 0.0028 | 0.7310 | 0.0000 |
| NGFR_P355_F    | 0.1099 | 0.1009 | 0.3079 | 0.0793 | 0.0408 | 0.3297 | 0.3130 | 0.0821 | 0.1097 | 0.8243 | 0.2891 | 0.1305 | 0.0962 | 0.0675 | 0.0536 |
| NKX3-1_P146_F  | 0.0000 | 0.0000 | 0.0075 | 0.0000 | 0.0150 | 0.1904 | 0.0000 | 0.0000 | 0.0100 | 0.0000 | 0.0000 | 0.0000 | 0.0076 | 0.0000 | 0.0000 |
| NKX3-1_P871_R  | 0.9915 | 0.9938 | 0.0000 | 0.0000 | 0.0000 | 0.9954 | 0.0000 | 0.9856 | 0.9791 | 0.9932 | 0.0000 | 0.9856 | 0.0000 | 0.9882 | 0.9872 |
| NOTCH1_E452_R  | 0.0000 | 0.0000 | 0.0000 | 0.0000 | 0.0000 | 0.0000 | 0.0000 | 0.0000 | 0.0000 | 0.0000 | 0.0000 | 0.0000 | 0.0000 | 0.0000 | 0.0000 |
| NOTCH1_P1198_F | 0.0000 | 0.0000 | 0.0000 | 0.0000 | 0.0001 | 0.0000 | 0.0000 | 0.0000 | 0.0000 | 0.0000 | 0.0000 | 0.0001 | 0.0028 | 0.0000 | 0.0000 |
| NOTCH2_P312_R  | 0.0043 | 0.0063 | 0.0039 | 0.8604 | 0.0045 | 0.3543 | 0.0056 | 0.0039 | 0.0041 | 0.0100 | 0.0053 | 0.0051 | 0.0035 | 0.0014 | 0.0000 |
| NOTCH3_E403_F  | 0.0000 | 0.0000 | 0.0000 | 0.0000 | 0.0000 | 0.0000 | 0.0040 | 0.0000 | 0.0000 | 0.0000 | 0.0000 | 0.0000 | 0.0000 | 0.0003 | 0.0000 |
| NPR2_P618_F    | 0.2566 | 0.6192 | 0.0000 | 0.0000 | 0.0000 | 0.0000 | 0.0000 | 0.0000 | 0.0098 | 0.1508 | 0.3011 | 0.0030 | 0.2414 | 0.0000 | 0.3301 |
| NPY_P295_F     | 0.0434 | 0.0312 | 0.7039 | 0.1838 | 0.6827 | 0.4900 | 0.0320 | 0.5638 | 0.0337 | 0.5443 | 0.0390 | 0.0676 | 0.0248 | 0.6001 | 0.3409 |
| NPY_P91_F      | 0.0095 | 0.0660 | 0.0159 | 0.0000 | 0.1567 | 0.1803 | 0.0102 | 0.0199 | 0.0247 | 0.0124 | 0.0972 | 0.0137 | 0.0943 | 0.0192 | 0.0000 |
| NQO1_E74_R     | 0.0151 | 0.0000 | 0.0065 | 0.6744 | 0.0000 | 0.0056 | 0.0000 | 0.0070 | 0.0059 | 0.0000 | 0.0000 | 0.0055 | 0.0056 | 0.0000 | 0.0000 |
| NQO1_P345_R    | 0.0019 | 0.0053 | 0.0000 | 0.0000 | 0.0030 | 0.0000 | 0.0000 | 0.6303 | 0.1868 | 0.0000 | 0.0000 | 0.0000 | 0.0040 | 0.0011 | 0.0000 |
| NR2F6_E375_R   | 0.0109 | 0.0000 | 0.0103 | 0.0000 | 0.3907 | 0.0524 | 0.0859 | 0.0097 | 0.0536 | 0.0194 | 0.0164 | 0.0263 | 0.5955 | 0.0087 | 0.0000 |
| NRAS_P103_R    | 0.0000 | 0.0000 | 0.0000 | 0.0000 | 0.0034 | 0.0218 | 0.0087 | 0.0000 | 0.0000 | 0.0019 | 0.0073 | 0.0052 | 0.0045 | 0.0023 | 0.0000 |
| NRAS_P12_R     | 0.0000 | 0.0000 | 0.0000 | 0.0000 | 0.0000 | 0.0000 | 0.0000 | 0.0000 | 0.0000 | 0.0000 | 0.0000 | 0.0000 | 0.0000 | 0.0000 | 0.0000 |
| NRG1_E74_F     | 0.0000 | 0.0090 | 0.0014 | 0.0000 | 0.0000 | 0.0000 | 0.0000 | 0.0010 | 0.0000 | 0.0050 | 0.0017 | 0.0086 | 0.0038 | 0.0001 | 0.0000 |
| NRG1_P558_R    | 0.0055 | 0.0045 | 0.1265 | 0.0693 | 0.2604 | 0.0589 | 0.0000 | 0.0045 | 0.0044 | 0.0275 | 0.0051 | 0.0058 | 0.0054 | 0.0033 | 0.0000 |
| NTRK2_P10_F    | 0.0133 | 0.2762 | 0.0116 | 0.0000 | 0.5058 | 0.0039 | 0.0869 | 0.0000 | 0.0109 | 0.0252 | 0.0000 | 0.0030 | 0.0069 | 0.0064 | 0.0000 |
| NTRK2_P395_R   | 0.0000 | 0.0000 | 0.0000 | 0.0000 | 0.0000 | 0.0000 | 0.0000 | 0.0000 | 0.0000 | 0.0000 | 0.0000 | 0.0000 | 0.0000 | 0.0000 | 0.0000 |
| NTRK3_E131_F   | 0.0058 | 0.0091 | 0.0061 | 0.0000 | 0.0000 | 0.0000 | 0.0000 | 0.0000 | 0.0029 | 0.0113 | 0.0000 | 0.0090 | 0.0089 | 0.0000 | 0.0000 |
| NTRK3_P636_R   | 0.8659 | 0.0032 | 0.0032 | 0.0000 | 0.0000 | 0.0000 | 0.0028 | 0.0000 | 0.0000 | 0.0023 | 0.0000 | 0.0000 | 0.0000 | 0.0000 | 0.0000 |
| NTRK3_P752_F   | 0.0000 | 0.0017 | 0.0032 | 0.0000 | 0.0000 | 0.0000 | 0.0000 | 0.0000 | 0.0003 | 0.0029 | 0.0000 | 0.0040 | 0.0000 | 0.0013 | 0.0000 |
| NTSR1_E109_F   | 0.0070 | 0.0073 | 0.0000 | 0.0000 | 0.0000 | 0.0000 | 0.0000 | 0.0068 | 0.0095 | 0.0090 | 0.0098 | 0.0000 | 0.0095 | 0.0093 | 0.0000 |
| NTSR1_P318_F   | 0.0149 | 0.1953 | 0.3818 | 0.0000 | 0.0069 | 0.0000 | 0.0000 | 0.0274 | 0.0113 | 0.0825 | 0.0970 | 0.5080 | 0.0083 | 0.0120 | 0.0000 |

|                    |        |        |        |        |        |        |        |        |        |        |        |        |        |        |        |
|--------------------|--------|--------|--------|--------|--------|--------|--------|--------|--------|--------|--------|--------|--------|--------|--------|
| OAT_P465_F         | 0.3489 | 0.0133 | 0.4405 | 0.1166 | 0.3916 | 0.4103 | 0.0104 | 0.0113 | 0.0111 | 0.0132 | 0.0114 | 0.0205 | 0.0095 | 0.5473 | 0.0000 |
| ODC1_P424_F        | 0.0000 | 0.0000 | 0.0000 | 0.0000 | 0.0000 | 0.0000 | 0.0000 | 0.0000 | 0.0003 | 0.0000 | 0.0032 | 0.0014 | 0.0023 | 0.0000 | 0.0000 |
| ONECUT2_E96_F      | 0.0000 | 0.0134 | 0.0107 | 0.0000 | 0.7572 | 0.0083 | 0.7489 | 0.0071 | 0.0295 | 0.0000 | 0.6411 | 0.1418 | 0.0339 | 0.3216 | 0.0000 |
| ONECUT2_P315_R     | 0.0000 | 0.0121 | 0.0000 | 0.0000 | 0.0000 | 0.0000 | 0.0000 | 0.0000 | 0.0000 | 0.0000 | 0.0067 | 0.0000 | 0.0000 | 0.0044 | 0.0000 |
| OPCML_E219_R       | 0.0043 | 0.0047 | 0.0030 | 0.5627 | 0.0033 | 0.0043 | 0.0068 | 0.0045 | 0.0076 | 0.0095 | 0.0000 | 0.7040 | 0.0000 | 0.0033 | 0.0000 |
| OPCML_P71_F        | 0.0134 | 0.0096 | 0.0078 | 0.0000 | 0.0073 | 0.0000 | 0.0000 | 0.0083 | 0.0049 | 0.0000 | 0.0156 | 0.0051 | 0.0023 | 0.0000 | 0.3557 |
| OSM_P188_F         | 0.0059 | 0.0698 | 0.0105 | 0.0000 | 0.0047 | 0.0775 | 0.0867 | 0.0936 | 0.0124 | 0.0387 | 0.0115 | 0.0079 | 0.9631 | 0.0087 | 0.0000 |
| p16_seq_47_S188_R  | 0.0187 | 0.0115 | 0.0029 | 0.0078 | 0.0000 | 0.0042 | 0.0000 | 0.0140 | 0.0110 | 0.0525 | 0.0047 | 0.0050 | 0.0164 | 0.0065 | 0.0000 |
| P2RX7_E323_R       | 0.0000 | 0.0000 | 0.0030 | 0.0000 | 0.0023 | 0.1902 | 0.1327 | 0.0077 | 0.0026 | 0.0043 | 0.0022 | 0.0075 | 0.0039 | 0.0028 | 0.4160 |
| P2RX7_P119_R       | 0.1246 | 0.0135 | 0.0138 | 0.6962 | 0.1498 | 0.1913 | 0.1980 | 0.0206 | 0.0901 | 0.0203 | 0.0152 | 0.0182 | 0.0197 | 0.0193 | 0.0017 |
| P2RX7_P597_F       | 0.2700 | 0.9957 | 0.5527 | 0.8134 | 0.8207 | 0.3958 | 0.3701 | 0.6501 | 0.9829 | 0.9941 | 0.8378 | 0.3369 | 0.9899 | 0.8631 | 0.7461 |
| PALM2-AKAP2_P183_R | 0.7266 | 0.0299 | 0.0297 | 0.3142 | 0.3525 | 0.7146 | 0.5395 | 0.0308 | 0.0276 | 0.5468 | 0.0329 | 0.0626 | 0.0279 | 0.0226 | 0.0154 |
| PALM2-AKAP2_P420_R | 0.0066 | 0.0128 | 0.0000 | 0.0000 | 0.0130 | 0.0000 | 0.0245 | 0.0093 | 0.2056 | 0.0083 | 0.0040 | 0.0000 | 0.0019 | 0.0160 | 0.1459 |
| PARP1_P610_R       | 0.8904 | 0.0065 | 0.9536 | 0.0000 | 0.9895 | 0.0000 | 0.0000 | 0.6431 | 0.8187 | 0.4631 | 0.0089 | 0.9103 | 0.5604 | 0.8162 | 0.9830 |
| PAX6_P1121_F       | 0.0111 | 0.0135 | 0.0082 | 0.0000 | 0.0051 | 0.2121 | 0.1197 | 0.0111 | 0.0144 | 0.0000 | 0.2776 | 0.0268 | 0.0026 | 0.0072 | 0.0000 |
| PAX6_P50_R         | 0.0000 | 0.0000 | 0.0005 | 0.0000 | 0.0000 | 0.0000 | 0.0000 | 0.0000 | 0.0000 | 0.0016 | 0.0000 | 0.0000 | 0.0000 | 0.0000 | 0.0000 |
| PCDH1_E22_F        | 0.0140 | 0.0079 | 0.1218 | 0.0000 | 0.1188 | 0.0081 | 0.0000 | 0.2213 | 0.0212 | 0.1671 | 0.0000 | 0.2205 | 0.0106 | 0.0219 | 0.0000 |
| PCGF4_P760_R       | 0.0051 | 0.0827 | 0.9910 | 0.0000 | 0.0047 | 0.0084 | 0.0091 | 0.0103 | 0.0118 | 0.0924 | 0.0767 | 0.0079 | 0.1006 | 0.9797 | 0.0000 |
| PCGF4_P92_R        | 0.0069 | 0.0277 | 0.0463 | 0.0000 | 0.0082 | 0.0000 | 0.0168 | 0.0280 | 0.7178 | 0.0243 | 0.0275 | 0.0260 | 0.0144 | 0.0143 | 0.0000 |
| PCTK1_E77_R        | 0.9974 | 0.9980 | 0.9345 | 0.9907 | 0.9466 | 0.9984 | 0.9619 | 0.9652 | 0.9490 | 0.9978 | 0.9967 | 0.9876 | 0.9450 | 0.8896 | 0.9219 |
| PDE1B_E141_F       | 0.0110 | 0.0071 | 0.0127 | 0.5141 | 0.0107 | 0.8067 | 0.0200 | 0.0138 | 0.0153 | 0.0148 | 0.0072 | 0.0418 | 0.0057 | 0.0144 | 0.0000 |
| PDE1B_P263_R       | 0.0055 | 0.0000 | 0.0111 | 0.0000 | 0.1431 | 0.0073 | 0.0000 | 0.5954 | 0.3605 | 0.0125 | 0.0094 | 0.0119 | 0.0086 | 0.0069 | 0.0000 |
| PDGFA_P841_R       | 0.0000 | 0.0000 | 0.0027 | 0.0000 | 0.0000 | 0.0000 | 0.0000 | 0.3819 | 0.0009 | 0.0000 | 0.0009 | 0.0000 | 0.0000 | 0.0002 | 0.0000 |
| PDGFRB_E195_R      | 0.0094 | 0.0061 | 0.0163 | 0.0000 | 0.0000 | 0.0067 | 0.0000 | 0.0000 | 0.0102 | 0.0000 | 0.0042 | 0.8711 | 0.0000 | 0.0070 | 0.0000 |
| PDGFRB_P343_F      | 0.0011 | 0.0035 | 0.0000 | 0.0052 | 0.0000 | 0.0000 | 0.0000 | 0.0031 | 0.0033 | 0.0032 | 0.0000 | 0.0053 | 0.0036 | 0.0041 | 0.0000 |
| PEG10_P978_R       | 0.0921 | 0.0000 | 0.8706 | 0.0000 | 0.0036 | 0.0000 | 0.0066 | 0.0707 | 0.0022 | 0.0079 | 0.0067 | 0.0459 | 0.0054 | 0.0448 | 0.0000 |
| PENK_E26_F         | 0.0274 | 0.0262 | 0.2596 | 0.0981 | 0.0386 | 0.0489 | 0.0252 | 0.2318 | 0.1340 | 0.0273 | 0.0456 | 0.0307 | 0.0298 | 0.0302 | 0.1201 |
| PENK_P447_R        | 0.0000 | 0.0000 | 0.1306 | 0.5350 | 0.0039 | 0.2619 | 0.0069 | 0.0271 | 0.0072 | 0.0080 | 0.0080 | 0.0119 | 0.3378 | 0.0986 | 0.0000 |
| PGF_E33_F          | 0.0088 | 0.0063 | 0.0109 | 0.0000 | 0.1497 | 0.4036 | 0.0000 | 0.0211 | 0.0109 | 0.0105 | 0.0133 | 0.1956 | 0.0100 | 0.7540 | 0.0000 |
| PHLDA2_P622_F      | 0.0088 | 0.0065 | 0.0053 | 0.0000 | 0.8205 | 0.0000 | 0.0072 | 0.0041 | 0.0070 | 0.0096 | 0.0044 | 0.0106 | 0.0000 | 0.0063 | 0.0000 |
| PI3_P1394_R        | 0.3062 | 0.4307 | 0.5573 | 0.8139 | 0.0148 | 0.6564 | 0.0183 | 0.8935 | 0.6712 | 0.0284 | 0.9870 | 0.3406 | 0.2973 | 0.0133 | 0.9726 |
| PITX2_E24_R        | 0.0070 | 0.2185 | 0.0056 | 0.0000 | 0.2003 | 0.1954 | 0.0052 | 0.0113 | 0.0101 | 0.1483 | 0.0117 | 0.6151 | 0.2504 | 0.0224 | 0.0000 |
| PITX2_P183_R       | 0.0000 | 0.0088 | 0.0027 | 0.0000 | 0.0000 | 0.0000 | 0.0057 | 0.0000 | 0.0000 | 0.0000 | 0.0000 | 0.0030 | 0.0000 | 0.0000 | 0.0000 |

|                |        |        |        |        |        |        |        |        |        |        |        |        |        |        |        |
|----------------|--------|--------|--------|--------|--------|--------|--------|--------|--------|--------|--------|--------|--------|--------|--------|
| PKD2_P287_R    | 0.1708 | 0.0000 | 0.3779 | 0.0000 | 0.3293 | 0.1851 | 0.0092 | 0.0000 | 0.0101 | 0.0347 | 0.1898 | 0.0190 | 0.0075 | 0.0045 | 0.0000 |
| PKD2_P336_R    | 0.3694 | 0.0133 | 0.0065 | 0.5580 | 0.5372 | 0.0040 | 0.1869 | 0.4153 | 0.0111 | 0.2075 | 0.0061 | 0.0111 | 0.0087 | 0.0150 | 0.0814 |
| PLAU_P11_F     | 0.1286 | 0.0233 | 0.0143 | 0.0000 | 0.0120 | 0.2483 | 0.3740 | 0.0195 | 0.0223 | 0.3730 | 0.0141 | 0.0190 | 0.3108 | 0.0185 | 0.4611 |
| PLAU_P176_R    | 0.0068 | 0.0069 | 0.0086 | 0.0000 | 0.0000 | 0.0031 | 0.0000 | 0.0068 | 0.0000 | 0.0000 | 0.0000 | 0.0000 | 0.0042 | 0.0000 | 0.0000 |
| PLAUR_E123_F   | 0.0000 | 0.0025 | 0.8745 | 0.0000 | 0.0010 | 0.0000 | 0.0040 | 0.4506 | 0.0058 | 0.0000 | 0.0019 | 0.0054 | 0.0019 | 0.0011 | 0.0000 |
| PLAUR_P82_F    | 0.0070 | 0.0046 | 0.0007 | 0.7304 | 0.0030 | 0.0045 | 0.0051 | 0.0037 | 0.0011 | 0.0080 | 0.0068 | 0.0000 | 0.0033 | 0.0039 | 0.0000 |
| PLG_E406_F     | 0.0000 | 0.7916 | 0.4641 | 0.0000 | 0.8951 | 0.9960 | 0.8730 | 0.9877 | 0.9894 | 0.9936 | 0.9938 | 0.9880 | 0.6829 | 0.9716 | 0.8092 |
| PLSCR3_P751_R  | 0.1361 | 0.0198 | 0.0127 | 0.0000 | 0.0135 | 0.0089 | 0.0095 | 0.0134 | 0.4036 | 0.0103 | 0.0127 | 0.0210 | 0.0406 | 0.3208 | 0.1620 |
| PLXDC1_P236_F  | 0.1931 | 0.0053 | 0.0037 | 0.0000 | 0.0000 | 0.0000 | 0.0000 | 0.0139 | 0.0111 | 0.0000 | 0.0105 | 0.0141 | 0.0000 | 0.0088 | 0.0000 |
| PLXDC2_E337_F  | 0.0077 | 0.0000 | 0.0087 | 0.0000 | 0.0069 | 0.4921 | 0.0000 | 0.0000 | 0.0037 | 0.0522 | 0.0093 | 0.0071 | 0.0000 | 0.0016 | 0.2256 |
| PLXDC2_P914_R  | 0.3183 | 0.0329 | 0.0289 | 0.2438 | 0.0268 | 0.4287 | 0.0217 | 0.0381 | 0.0287 | 0.0461 | 0.0431 | 0.0523 | 0.3332 | 0.4978 | 0.0077 |
| PMP22_P975_F   | 0.9919 | 0.0000 | 0.0000 | 0.0000 | 0.0000 | 0.0000 | 0.0000 | 0.0341 | 0.0000 | 0.0000 | 0.9918 | 0.9894 | 0.0000 | 0.0000 | 0.4654 |
| PODXL_P1341_R  | 0.6478 | 0.0096 | 0.0079 | 0.2103 | 0.0043 | 0.0547 | 0.0077 | 0.0076 | 0.0053 | 0.1173 | 0.0077 | 0.0116 | 0.0000 | 0.0056 | 0.0000 |
| POMC_E254_F    | 0.0064 | 0.0036 | 0.5830 | 0.0000 | 0.0588 | 0.0000 | 0.7016 | 0.0170 | 0.0122 | 0.0000 | 0.0153 | 0.0118 | 0.0000 | 0.0132 | 0.0373 |
| POMC_P400_R    | 0.0000 | 0.0000 | 0.0000 | 0.0000 | 0.0085 | 0.1826 | 0.1787 | 0.0081 | 0.0080 | 0.0000 | 0.0061 | 0.0083 | 0.0000 | 0.0064 | 0.0000 |
| POMC_P53_F     | 0.0125 | 0.0073 | 0.0030 | 0.0000 | 0.0108 | 0.0000 | 0.0000 | 0.0180 | 0.0107 | 0.3061 | 0.1210 | 0.0137 | 0.0060 | 0.0103 | 0.0000 |
| PPARD_P846_F   | 0.0000 | 0.0062 | 0.0000 | 0.5330 | 0.0000 | 0.0039 | 0.0000 | 0.0000 | 0.7359 | 0.0000 | 0.0000 | 0.0000 | 0.0074 | 0.0000 | 0.0000 |
| PPARG_E178_R   | 0.0117 | 0.0000 | 0.0000 | 0.0000 | 0.0688 | 0.0000 | 0.0000 | 0.0113 | 0.0049 | 0.1499 | 0.0079 | 0.0074 | 0.0033 | 0.0029 | 0.0000 |
| PPP2R1B_P268_R | 0.0000 | 0.0000 | 0.0050 | 0.0000 | 0.0052 | 0.0876 | 0.0000 | 0.0059 | 0.0049 | 0.0119 | 0.0000 | 0.0035 | 0.0002 | 0.0084 | 0.0000 |
| PRDM2_P1340_R  | 0.0000 | 0.0000 | 0.0339 | 0.0000 | 0.0273 | 0.0000 | 0.9875 | 0.1501 | 0.0106 | 0.9839 | 0.0080 | 0.0000 | 0.9761 | 0.0718 | 0.9645 |
| PRKCDBP_E206_F | 0.0000 | 0.0000 | 0.0000 | 0.0000 | 0.0000 | 0.0000 | 0.0059 | 0.0000 | 0.0020 | 0.0058 | 0.0000 | 0.0067 | 0.0000 | 0.0041 | 0.0000 |
| PROK2_E0_F     | 0.0061 | 0.0000 | 0.0000 | 0.0000 | 0.0022 | 0.0000 | 0.0000 | 0.0000 | 0.0051 | 0.0000 | 0.0065 | 0.0000 | 0.0000 | 0.0007 | 0.0000 |
| PROK2_P390_F   | 0.0101 | 0.0060 | 0.0000 | 0.7176 | 0.0000 | 0.0089 | 0.0000 | 0.0000 | 0.0000 | 0.0000 | 0.0000 | 0.0000 | 0.0000 | 0.0000 | 0.0000 |
| PRSS8_E134_R   | 0.9934 | 0.1469 | 0.9923 | 0.1377 | 0.3895 | 0.1531 | 0.9952 | 0.9885 | 0.9875 | 0.9939 | 0.9913 | 0.3297 | 0.2280 | 0.9884 | 0.9889 |
| PSCA_E359_F    | 0.0001 | 0.0000 | 0.0000 | 0.0000 | 0.0000 | 0.0000 | 0.0000 | 0.0035 | 0.0064 | 0.0000 | 0.0105 | 0.0080 | 0.0000 | 0.0000 | 0.0000 |
| PSIP1_P163_R   | 0.0088 | 0.0058 | 0.0000 | 0.0000 | 0.0000 | 0.0000 | 0.0122 | 0.0152 | 0.5102 | 0.0000 | 0.0048 | 0.0113 | 0.0064 | 0.0000 | 0.0000 |
| PTCH_E42_F     | 0.3550 | 0.0051 | 0.0096 | 0.0000 | 0.2846 | 0.0000 | 0.0450 | 0.2302 | 0.0121 | 0.0093 | 0.0089 | 0.0271 | 0.0528 | 0.0000 | 0.0000 |
| PTCH2_P568_R   | 0.0086 | 0.0047 | 0.0435 | 0.0000 | 0.0083 | 0.0001 | 0.0085 | 0.0323 | 0.3265 | 0.0289 | 0.8482 | 0.0100 | 0.4959 | 0.5213 | 0.0000 |
| PTEN_P438_F    | 0.0117 | 0.0075 | 0.0063 | 0.0000 | 0.0053 | 0.0046 | 0.0000 | 0.0060 | 0.0081 | 0.0116 | 0.0078 | 0.0098 | 0.0000 | 0.0094 | 0.0000 |
| PTGS1_P2_F     | 0.0131 | 0.0157 | 0.0211 | 0.0000 | 0.0024 | 0.0000 | 0.0091 | 0.0080 | 0.4216 | 0.0094 | 0.0139 | 0.0000 | 0.0000 | 0.0080 | 0.0000 |
| PTGS2_P308_F   | 0.0048 | 0.1221 | 0.0078 | 0.2673 | 0.0037 | 0.0229 | 0.0084 | 0.0037 | 0.0075 | 0.0097 | 0.0888 | 0.1474 | 0.1427 | 0.0028 | 0.0000 |
| PTGS2_P524_R   | 0.0081 | 0.0094 | 0.0000 | 0.0000 | 0.0000 | 0.3107 | 0.0000 | 0.0094 | 0.1319 | 0.0170 | 0.0075 | 0.0121 | 0.0092 | 0.0072 | 0.3242 |
| PTHLH_P15_R    | 0.0000 | 0.0000 | 0.0678 | 0.1891 | 0.0000 | 0.0040 | 0.0000 | 0.0000 | 0.0018 | 0.0000 | 0.0020 | 0.0019 | 0.0556 | 0.0000 | 0.0000 |

|                   |        |        |        |        |        |        |        |        |        |        |        |        |        |        |        |
|-------------------|--------|--------|--------|--------|--------|--------|--------|--------|--------|--------|--------|--------|--------|--------|--------|
| PTHR1_P170_R      | 0.2567 | 0.0000 | 0.9923 | 0.0816 | 0.8859 | 0.0000 | 0.2640 | 0.0000 | 0.9491 | 0.0000 | 0.0000 | 0.0000 | 0.0059 | 0.0361 | 0.8552 |
| PTK2_P735_R       | 0.0120 | 0.4294 | 0.2154 | 0.0000 | 0.0088 | 0.0000 | 0.0000 | 0.0091 | 0.0120 | 0.0138 | 0.2028 | 0.0091 | 0.0052 | 0.0093 | 0.0000 |
| PTK2B_P673_R      | 0.0000 | 0.0035 | 0.0054 | 0.0000 | 0.0000 | 0.0000 | 0.0000 | 0.0000 | 0.0077 | 0.0000 | 0.0045 | 0.0099 | 0.0027 | 0.0057 | 0.0000 |
| PTPN6_E171_R      | 0.0055 | 0.0058 | 0.0000 | 0.0809 | 0.0019 | 0.0000 | 0.0026 | 0.0000 | 0.0000 | 0.0000 | 0.0045 | 0.0066 | 0.0021 | 0.0000 | 0.0000 |
| PTPN6_P282_R      | 0.0000 | 0.0035 | 0.0000 | 0.0000 | 0.0000 | 0.0000 | 0.0000 | 0.0000 | 0.0000 | 0.0000 | 0.0000 | 0.0000 | 0.0000 | 0.0000 | 0.0000 |
| PTPNS1_E433_R     | 0.0000 | 0.0000 | 0.0006 | 0.0000 | 0.0015 | 0.0000 | 0.0000 | 0.0000 | 0.0000 | 0.0000 | 0.0000 | 0.0000 | 0.0000 | 0.0000 | 0.0000 |
| PTPNS1_P301_R     | 0.0000 | 0.0000 | 0.0000 | 0.0000 | 0.0368 | 0.0033 | 0.3122 | 0.1233 | 0.0135 | 0.2414 | 0.0128 | 0.0000 | 0.0094 | 0.0058 | 0.0000 |
| PTPRF_E178_R      | 0.8050 | 0.0088 | 0.0031 | 0.0000 | 0.0000 | 0.0028 | 0.0014 | 0.3804 | 0.0506 | 0.0079 | 0.0000 | 0.0015 | 0.0060 | 0.0043 | 0.0000 |
| PTPRG_E40_R       | 0.0075 | 0.2310 | 0.0079 | 0.0288 | 0.1635 | 0.2664 | 0.1813 | 0.0099 | 0.0103 | 0.0124 | 0.6408 | 0.0076 | 0.3239 | 0.3307 | 0.0000 |
| PTPRG_P476_F      | 0.0000 | 0.1433 | 0.2095 | 0.0000 | 0.0000 | 0.0000 | 0.0060 | 0.0067 | 0.0084 | 0.0080 | 0.0078 | 0.0072 | 0.0000 | 0.0047 | 0.0000 |
| PTPRO_E56_F       | 0.0461 | 0.0608 | 0.0001 | 0.0455 | 0.0026 | 0.0896 | 0.0301 | 0.0018 | 0.0000 | 0.0069 | 0.0053 | 0.0000 | 0.0019 | 0.0010 | 0.0000 |
| PURA_P928_R       | 0.0024 | 0.0063 | 0.0000 | 0.0000 | 0.0000 | 0.0000 | 0.0000 | 0.0000 | 0.0015 | 0.0000 | 0.0000 | 0.0000 | 0.0000 | 0.0000 | 0.0000 |
| PWCR1_P811_F      | 0.9887 | 0.0000 | 0.0000 | 0.0000 | 0.0000 | 0.0000 | 0.0000 | 0.9705 | 0.9779 | 0.0070 | 0.9882 | 0.0000 | 0.0000 | 0.9792 | 0.9804 |
| PYCARD_E87_F      | 0.0747 | 0.0731 | 0.0127 | 0.0363 | 0.2205 | 0.1217 | 0.0642 | 0.0085 | 0.0134 | 0.0274 | 0.0611 | 0.0139 | 0.0969 | 0.0189 | 0.0000 |
| PYCARD_P150_F     | 0.0662 | 0.0077 | 0.0091 | 0.0000 | 0.9334 | 0.0000 | 0.0072 | 0.7829 | 0.0149 | 0.0105 | 0.0000 | 0.0177 | 0.0168 | 0.0085 | 0.1780 |
| RAB32_E314_R      | 0.0068 | 0.0000 | 0.0000 | 0.0000 | 0.0053 | 0.0000 | 0.0000 | 0.0022 | 0.0003 | 0.0123 | 0.0000 | 0.0108 | 0.0000 | 0.0063 | 0.0000 |
| RAB32_P493_R      | 0.0000 | 0.0032 | 0.0003 | 0.0000 | 0.0651 | 0.0000 | 0.0000 | 0.0018 | 0.0000 | 0.0048 | 0.0038 | 0.0000 | 0.0000 | 0.0000 | 0.0000 |
| RAF1_P330_F       | 0.0000 | 0.0000 | 0.0000 | 0.0000 | 0.0000 | 0.0032 | 0.0000 | 0.9489 | 0.0033 | 0.0068 | 0.0000 | 0.0041 | 0.0013 | 0.0000 | 0.4779 |
| RAN_P581_R        | 0.0000 | 0.0000 | 0.7350 | 0.0000 | 0.9917 | 0.0000 | 0.0000 | 0.0038 | 0.0039 | 0.9935 | 0.9895 | 0.0031 | 0.9908 | 0.0023 | 0.0000 |
| RARA_E128_R       | 0.0035 | 0.0000 | 0.0033 | 0.0000 | 0.0019 | 0.0000 | 0.0000 | 0.0074 | 0.0078 | 0.0058 | 0.0050 | 0.0080 | 0.0580 | 0.2530 | 0.0000 |
| RARA_P176_R       | 0.0010 | 0.0031 | 0.0000 | 0.0000 | 0.0018 | 0.0000 | 0.0000 | 0.0000 | 0.0036 | 0.0000 | 0.0000 | 0.9249 | 0.0000 | 0.0000 | 0.0000 |
| RARB_E114_F       | 0.0033 | 0.0000 | 0.6047 | 0.0000 | 0.0008 | 0.0000 | 0.0046 | 0.0035 | 0.0045 | 0.0064 | 0.0035 | 0.0922 | 0.0041 | 0.0031 | 0.0000 |
| RARB_P60_F        | 0.0000 | 0.9152 | 0.0013 | 0.0000 | 0.0000 | 0.0041 | 0.0068 | 0.7404 | 0.0000 | 0.0005 | 0.9304 | 0.0000 | 0.0022 | 0.0031 | 0.3402 |
| RARRES1_E235_F    | 0.0112 | 0.0789 | 0.0081 | 0.0879 | 0.0093 | 0.1231 | 0.0141 | 0.0101 | 0.1511 | 0.0146 | 0.0857 | 0.0095 | 0.0084 | 0.0069 | 0.0000 |
| RASGRF1_E16_F     | 0.0115 | 0.1351 | 0.0091 | 0.0000 | 0.0004 | 0.0028 | 0.0493 | 0.0073 | 0.0082 | 0.0078 | 0.2852 | 0.9883 | 0.0000 | 0.0061 | 0.0000 |
| RASGRF1_P768_F    | 0.0000 | 0.1764 | 0.2118 | 0.7023 | 0.0064 | 0.0102 | 0.3278 | 0.0016 | 0.0091 | 0.0066 | 0.0097 | 0.0149 | 0.0041 | 0.0040 | 0.0000 |
| RASSF1_E116_F     | 0.0010 | 0.0023 | 0.0062 | 0.0000 | 0.1215 | 0.0000 | 0.0000 | 0.0030 | 0.0068 | 0.2972 | 0.1901 | 0.0099 | 0.0060 | 0.0000 | 0.0000 |
| RASSF1_P244_F     | 0.0000 | 0.0000 | 0.2588 | 0.4203 | 0.2575 | 0.0000 | 0.0066 | 0.1096 | 0.0105 | 0.0079 | 0.2493 | 0.0000 | 0.0132 | 0.0124 | 0.0000 |
| RBL2_P250_R       | 0.0000 | 0.0000 | 0.0041 | 0.0000 | 0.0052 | 0.0000 | 0.0943 | 0.0066 | 0.0059 | 0.0109 | 0.0000 | 0.0026 | 0.0329 | 0.0128 | 0.0000 |
| RBP1_E158_F       | 0.0000 | 0.0000 | 0.0011 | 0.0000 | 0.0000 | 0.0031 | 0.0000 | 0.0001 | 0.0000 | 0.0015 | 0.0020 | 0.0000 | 0.0016 | 0.0000 | 0.0000 |
| RBP1_P150_F       | 0.0000 | 0.0000 | 0.0000 | 0.0000 | 0.0000 | 0.0000 | 0.0000 | 0.0000 | 0.0000 | 0.0000 | 0.0000 | 0.0000 | 0.0000 | 0.0000 | 0.0000 |
| RET_P717_F        | 0.1874 | 0.0081 | 0.1534 | 0.0000 | 0.0071 | 0.2830 | 0.0000 | 0.0121 | 0.0107 | 0.0339 | 0.0081 | 0.0090 | 0.0097 | 0.0080 | 0.0000 |
| RET_seq_53_S374_F | 0.0071 | 0.0030 | 0.3214 | 0.0000 | 0.2945 | 0.1730 | 0.2906 | 0.0114 | 0.0053 | 0.1547 | 0.2356 | 0.0036 | 0.0068 | 0.8243 | 0.0000 |

|                 |        |        |        |        |        |        |        |        |        |        |        |        |        |        |        |
|-----------------|--------|--------|--------|--------|--------|--------|--------|--------|--------|--------|--------|--------|--------|--------|--------|
| RHOC_P536_F     | 0.0000 | 0.0000 | 0.0000 | 0.0000 | 0.0017 | 0.0000 | 0.0000 | 0.0000 | 0.0000 | 0.0000 | 0.0000 | 0.0005 | 0.0000 | 0.0000 | 0.0000 |
| RHOH_P121_F     | 0.0022 | 0.0059 | 0.0000 | 0.0000 | 0.0000 | 0.0045 | 0.0000 | 0.0000 | 0.0000 | 0.0000 | 0.0000 | 0.0027 | 0.0000 | 0.0000 | 0.0000 |
| RHOH_P953_R     | 0.9909 | 0.1778 | 0.0000 | 0.0000 | 0.0047 | 0.0000 | 0.0000 | 0.9779 | 0.8630 | 0.0000 | 0.0000 | 0.0057 | 0.0000 | 0.9798 | 0.9739 |
| RIPK1_P868_F    | 0.9456 | 0.5477 | 0.9907 | 0.5983 | 0.9902 | 0.6204 | 0.4032 | 0.9842 | 0.9725 | 0.6852 | 0.0243 | 0.0961 | 0.5052 | 0.0523 | 0.9798 |
| RIPK2_E123_F    | 0.6083 | 0.0000 | 0.0000 | 0.0000 | 0.0065 | 0.0000 | 0.0090 | 0.0090 | 0.9389 | 0.0000 | 0.0000 | 0.0000 | 0.0000 | 0.0059 | 0.0000 |
| RIPK3_P124_F    | 0.0336 | 0.0519 | 0.1203 | 0.0000 | 0.0104 | 0.0041 | 0.0938 | 0.0096 | 0.0113 | 0.0000 | 0.0082 | 0.0093 | 0.0094 | 0.0000 | 0.0000 |
| RIPK3_P24_F     | 0.0000 | 0.0000 | 0.0000 | 0.0000 | 0.0000 | 0.0000 | 0.0000 | 0.0000 | 0.0020 | 0.0052 | 0.0000 | 0.0000 | 0.0000 | 0.0000 | 0.0000 |
| RIPK4_E166_F    | 0.0000 | 0.0046 | 0.0021 | 0.0000 | 0.0000 | 0.1263 | 0.0000 | 0.0031 | 0.0012 | 0.0000 | 0.0000 | 0.0033 | 0.0000 | 0.0000 | 0.3241 |
| RIPK4_P172_F    | 0.0103 | 0.0057 | 0.4100 | 0.0000 | 0.0096 | 0.0039 | 0.0139 | 0.2891 | 0.4576 | 0.0107 | 0.0068 | 0.5374 | 0.0082 | 0.0083 | 0.0000 |
| ROR1_P6_F       | 0.0000 | 0.0000 | 0.0128 | 0.0000 | 0.0505 | 0.0000 | 0.0000 | 0.5442 | 0.0062 | 0.0000 | 0.0000 | 0.0111 | 0.0083 | 0.0068 | 0.0000 |
| ROR2_P317_R     | 0.0000 | 0.0000 | 0.0000 | 0.0000 | 0.0000 | 0.9958 | 0.0089 | 0.0000 | 0.0000 | 0.0000 | 0.0000 | 0.0006 | 0.0037 | 0.0000 | 0.0000 |
| RRAS_P100_R     | 0.0000 | 0.0000 | 0.0000 | 0.0000 | 0.0000 | 0.0000 | 0.0000 | 0.0000 | 0.0016 | 0.0000 | 0.0000 | 0.0000 | 0.0000 | 0.0000 | 0.0000 |
| RUNX3_P247_F    | 0.7629 | 0.0309 | 0.0000 | 0.0000 | 0.0000 | 0.0000 | 0.0000 | 0.0000 | 0.9653 | 0.9886 | 0.0038 | 0.6194 | 0.0000 | 0.9858 | 0.8919 |
| RYK_P493_F      | 0.0024 | 0.0000 | 0.0000 | 0.0000 | 0.0000 | 0.0000 | 0.0011 | 0.0000 | 0.0000 | 0.0000 | 0.0000 | 0.0000 | 0.8207 | 0.0000 | 0.0000 |
| S100A2_E36_R    | 0.0112 | 0.0000 | 0.0000 | 0.0000 | 0.0000 | 0.0000 | 0.0000 | 0.0050 | 0.4568 | 0.0000 | 0.0000 | 0.0000 | 0.0000 | 0.0000 | 0.7465 |
| S100A4_E315_F   | 0.2206 | 0.0172 | 0.0151 | 0.8264 | 0.2323 | 0.5692 | 0.1086 | 0.0095 | 0.0083 | 0.0111 | 0.0176 | 0.0120 | 0.0113 | 0.0072 | 0.2892 |
| SCGB3A1_E55_R   | 0.0030 | 0.0000 | 0.0000 | 0.0000 | 0.0000 | 0.0000 | 0.0000 | 0.0035 | 0.0000 | 0.0000 | 0.0050 | 0.0035 | 0.0000 | 0.0000 | 0.0000 |
| SCGB3A1_P103_R  | 0.0000 | 0.0000 | 0.0000 | 0.0000 | 0.0000 | 0.0000 | 0.0000 | 0.0000 | 0.0000 | 0.0000 | 0.0036 | 0.0000 | 0.0000 | 0.0000 | 0.0000 |
| SEMA3A_P343_F   | 0.0000 | 0.9942 | 0.0016 | 0.0000 | 0.0053 | 0.0048 | 0.0000 | 0.0020 | 0.0000 | 0.0000 | 0.0000 | 0.0000 | 0.0000 | 0.0060 | 0.0000 |
| SEMA3A_P658_R   | 0.0911 | 0.0557 | 0.1115 | 0.0000 | 0.0091 | 0.1204 | 0.8083 | 0.0383 | 0.8919 | 0.0480 | 0.0830 | 0.8978 | 0.0858 | 0.0143 | 0.0000 |
| SEMA3C_E49_R    | 0.1588 | 0.1491 | 0.0117 | 0.0000 | 0.0071 | 0.1514 | 0.0119 | 0.0136 | 0.0115 | 0.0121 | 0.0129 | 0.0126 | 0.1703 | 0.0152 | 0.0000 |
| SEMA3C_P642_F   | 0.0038 | 0.1795 | 0.0000 | 0.0000 | 0.0000 | 0.0000 | 0.1285 | 0.0282 | 0.9214 | 0.0111 | 0.1537 | 0.0000 | 0.0044 | 0.0000 | 0.0000 |
| SEMA3F_E333_R   | 0.0000 | 0.0000 | 0.0194 | 0.0000 | 0.0053 | 0.0000 | 0.0112 | 0.0132 | 0.0072 | 0.0000 | 0.0000 | 0.0072 | 0.0047 | 0.0068 | 0.0000 |
| SEMA3F_P692_R   | 0.0000 | 0.0000 | 0.0000 | 0.0000 | 0.0000 | 0.0000 | 0.0050 | 0.0039 | 0.0042 | 0.0057 | 0.0015 | 0.0000 | 0.0000 | 0.7681 | 0.0000 |
| SEPT5_P441_F    | 0.0235 | 0.0108 | 0.9918 | 0.0000 | 0.0491 | 0.2022 | 0.0220 | 0.5954 | 0.4910 | 0.0000 | 0.0709 | 0.0097 | 0.0081 | 0.0099 | 0.6918 |
| SEPT9_P58_R     | 0.0123 | 0.4591 | 0.0034 | 0.0000 | 0.0082 | 0.7027 | 0.1406 | 0.0373 | 0.8934 | 0.5968 | 0.9899 | 0.9909 | 0.7780 | 0.9801 | 0.6888 |
| SERPINA5_E69_F  | 0.9903 | 0.8533 | 0.0130 | 0.8254 | 0.0113 | 0.5809 | 0.0200 | 0.6304 | 0.8336 | 0.3360 | 0.0220 | 0.9843 | 0.3171 | 0.9822 | 0.0000 |
| SERPIN2_P939_F  | 0.0000 | 0.0000 | 0.9879 | 0.0000 | 0.9873 | 0.9952 | 0.0000 | 0.9893 | 0.9794 | 0.9918 | 0.9894 | 0.9839 | 0.0000 | 0.9921 | 0.9399 |
| SERPINE1_E189_R | 0.2281 | 0.0102 | 0.0093 | 0.0000 | 0.9930 | 0.1513 | 0.4651 | 0.3088 | 0.1892 | 0.0113 | 0.0161 | 0.0139 | 0.3273 | 0.0112 | 0.2459 |
| SEZ6L_P249_F    | 0.0048 | 0.0052 | 0.0093 | 0.0261 | 0.0027 | 0.0048 | 0.0000 | 0.0000 | 0.0062 | 0.0062 | 0.0000 | 0.0000 | 0.0044 | 0.0043 | 0.0000 |
| SEZ6L_P299_F    | 0.0013 | 0.0000 | 0.0121 | 0.0000 | 0.0000 | 0.0000 | 0.0000 | 0.0000 | 0.0044 | 0.0000 | 0.0000 | 0.0047 | 0.0033 | 0.0071 | 0.0000 |
| SFN_E118_F      | 0.9239 | 0.0872 | 0.7797 | 0.6634 | 0.7648 | 0.9135 | 0.0411 | 0.7122 | 0.9853 | 0.5804 | 0.5028 | 0.9906 | 0.8880 | 0.9899 | 0.9901 |
| SFRP1_E398_R    | 0.0000 | 0.0000 | 0.0011 | 0.0000 | 0.0000 | 0.0000 | 0.0000 | 0.0000 | 0.0020 | 0.0045 | 0.0171 | 0.0000 | 0.0000 | 0.0000 | 0.0000 |

|                      |        |        |        |        |        |        |        |        |        |        |        |        |        |        |        |
|----------------------|--------|--------|--------|--------|--------|--------|--------|--------|--------|--------|--------|--------|--------|--------|--------|
| SFRP1_P157_F         | 0.0088 | 0.0056 | 0.4076 | 0.0000 | 0.0000 | 0.0000 | 0.0000 | 0.0034 | 0.0053 | 0.0000 | 0.0009 | 0.3988 | 0.0000 | 0.0033 | 0.0000 |
| SFTPA1_E340_R        | 0.0000 | 0.9950 | 0.0010 | 0.0000 | 0.0000 | 0.0000 | 0.9940 | 0.9805 | 0.9869 | 0.0000 | 0.0000 | 0.0000 | 0.9925 | 0.0000 | 0.9856 |
| SH3BP2_P771_R        | 0.0000 | 0.0000 | 0.0060 | 0.0000 | 0.0000 | 0.0000 | 0.0045 | 0.0000 | 0.5264 | 0.0075 | 0.0000 | 0.0088 | 0.0000 | 0.0000 | 0.0000 |
| SHB_P473_R           | 0.0078 | 0.0000 | 0.0000 | 0.5290 | 0.0000 | 0.0018 | 0.0000 | 0.0050 | 0.0053 | 0.0056 | 0.0000 | 0.0066 | 0.0065 | 0.0059 | 0.0000 |
| SHB_P691_R           | 0.0082 | 0.0107 | 0.5261 | 0.4359 | 0.4462 | 0.2986 | 0.4044 | 0.0206 | 0.0123 | 0.1033 | 0.4493 | 0.0159 | 0.0157 | 0.0080 | 0.0000 |
| SHH_E328_F           | 0.0000 | 0.0000 | 0.0000 | 0.0000 | 0.0000 | 0.0000 | 0.0000 | 0.0000 | 0.0000 | 0.9888 | 0.0000 | 0.0000 | 0.0011 | 0.0000 | 0.0000 |
| SHH_P104_R           | 0.0119 | 0.0000 | 0.0073 | 0.0000 | 0.0095 | 0.0000 | 0.0000 | 0.0138 | 0.0107 | 0.0000 | 0.0048 | 0.0128 | 0.0085 | 0.0037 | 0.0000 |
| SIN3B_P514_R         | 0.0000 | 0.0000 | 0.9781 | 0.0000 | 0.9719 | 0.0000 | 0.0000 | 0.7939 | 0.9799 | 0.0000 | 0.9778 | 0.9584 | 0.9710 | 0.9735 | 0.9539 |
| SKI_E465_R           | 0.0000 | 0.0079 | 0.0000 | 0.0000 | 0.0081 | 0.0000 | 0.0067 | 0.0123 | 0.0071 | 0.0080 | 0.0054 | 0.0058 | 0.0070 | 0.0088 | 0.0000 |
| SLC22A2_E271_R       | 0.0000 | 0.0000 | 0.0564 | 0.0000 | 0.9915 | 0.0000 | 0.5408 | 0.9853 | 0.9890 | 0.0000 | 0.3293 | 0.9905 | 0.0000 | 0.9859 | 0.9823 |
| SLC22A3_P634_F       | 0.8515 | 0.0152 | 0.1636 | 0.0000 | 0.0110 | 0.0000 | 0.0000 | 0.4644 | 0.1209 | 0.0084 | 0.0057 | 0.0099 | 0.0024 | 0.4354 | 0.1665 |
| SLC6A8_seq_28_S227_F | 0.0000 | 0.1147 | 0.0000 | 0.0000 | 0.0000 | 0.0000 | 0.0000 | 0.0000 | 0.0048 | 0.0062 | 0.0260 | 0.0013 | 0.0000 | 0.7710 | 0.0000 |
| SLIT2_P208_F         | 0.9933 | 0.3646 | 0.2193 | 0.6948 | 0.0098 | 0.0053 | 0.3509 | 0.1561 | 0.0095 | 0.0105 | 0.0097 | 0.0265 | 0.0087 | 0.2562 | 0.0000 |
| SMAD2_P708_R         | 0.0000 | 0.0080 | 0.0017 | 0.0011 | 0.0000 | 0.0000 | 0.0000 | 0.0022 | 0.0076 | 0.0059 | 0.0038 | 0.0046 | 0.0011 | 0.0086 | 0.0000 |
| SMAD2_P848_R         | 0.0059 | 0.0034 | 0.0004 | 0.0000 | 0.0000 | 0.0000 | 0.0000 | 0.0002 | 0.0000 | 0.0000 | 0.0022 | 0.0050 | 0.0025 | 0.0000 | 0.0000 |
| SMAD4_P474_R         | 0.0011 | 0.0011 | 0.0000 | 0.0000 | 0.0000 | 0.0000 | 0.0006 | 0.0000 | 0.0028 | 0.0000 | 0.0000 | 0.0038 | 0.0000 | 0.0004 | 0.0000 |
| SMARCA3_E20_F        | 0.0000 | 0.0063 | 0.0000 | 0.0000 | 0.0016 | 0.0000 | 0.0000 | 0.0047 | 0.0036 | 0.0054 | 0.0041 | 0.0058 | 0.0000 | 0.0040 | 0.0000 |
| SMARCA3_P109_R       | 0.6137 | 0.0061 | 0.3427 | 0.3783 | 0.5125 | 0.3198 | 0.0095 | 0.0083 | 0.0139 | 0.0084 | 0.0389 | 0.5638 | 0.0132 | 0.0102 | 0.0000 |
| SMARCA3_P17_R        | 0.0000 | 0.0073 | 0.0000 | 0.0000 | 0.0000 | 0.0038 | 0.0000 | 0.0135 | 0.0027 | 0.0000 | 0.0000 | 0.0000 | 0.0029 | 0.0028 | 0.0000 |
| SMARCA4_P362_R       | 0.0051 | 0.0544 | 0.0111 | 0.0000 | 0.0050 | 0.0954 | 0.0568 | 0.0082 | 0.0071 | 0.0069 | 0.0048 | 0.0086 | 0.0077 | 0.0042 | 0.0000 |
| SMO_E57_F            | 0.0030 | 0.0000 | 0.0000 | 0.0000 | 0.0028 | 0.0000 | 0.0000 | 0.0000 | 0.0078 | 0.0027 | 0.0019 | 0.0000 | 0.0000 | 0.0018 | 0.0000 |
| SOD3_P225_F          | 0.0000 | 0.1316 | 0.0964 | 0.4844 | 0.9910 | 0.9960 | 0.2362 | 0.0000 | 0.9781 | 0.0100 | 0.0870 | 0.0208 | 0.2073 | 0.0000 | 0.9731 |
| SOX1_P1018_R         | 0.0005 | 0.1310 | 0.0783 | 0.0000 | 0.0000 | 0.0000 | 0.0273 | 0.0049 | 0.0010 | 0.0176 | 0.0025 | 0.0025 | 0.0000 | 0.0000 | 0.0000 |
| SOX1_P294_F          | 0.5392 | 0.0218 | 0.0093 | 0.8563 | 0.0110 | 0.7875 | 0.4651 | 0.0194 | 0.0139 | 0.5052 | 0.0111 | 0.5313 | 0.0102 | 0.0106 | 0.0000 |
| SOX17_P287_R         | 0.0000 | 0.0000 | 0.0000 | 0.0000 | 0.0000 | 0.0007 | 0.0023 | 0.0000 | 0.0000 | 0.0000 | 0.0025 | 0.0000 | 0.0000 | 0.0000 | 0.0000 |
| SOX17_P303_F         | 0.7342 | 0.7903 | 0.2215 | 0.5453 | 0.9069 | 0.8048 | 0.7428 | 0.7251 | 0.1117 | 0.7796 | 0.7471 | 0.2310 | 0.7226 | 0.1436 | 0.1419 |
| SOX2_P546_F          | 0.0000 | 0.0064 | 0.1893 | 0.0000 | 0.0068 | 0.0216 | 0.0097 | 0.0000 | 0.0113 | 0.0101 | 0.0000 | 0.0097 | 0.0053 | 0.0092 | 0.0000 |
| SPARC_E50_R          | 0.0099 | 0.0069 | 0.0068 | 0.0000 | 0.0042 | 0.0000 | 0.0049 | 0.3476 | 0.1182 | 0.0101 | 0.0043 | 0.2535 | 0.5445 | 0.0079 | 0.0053 |
| SPARC_P195_F         | 0.0054 | 0.0075 | 0.6208 | 0.0000 | 0.0044 | 0.0000 | 0.0265 | 0.0072 | 0.0021 | 0.0000 | 0.0000 | 0.9792 | 0.7786 | 0.0036 | 0.0000 |
| SPDEF_E116_R         | 0.1655 | 0.1813 | 0.2039 | 0.8385 | 0.4154 | 0.2878 | 0.1556 | 0.7076 | 0.0940 | 0.2223 | 0.1953 | 0.5883 | 0.1361 | 0.2131 | 0.0014 |
| SPI1_E205_F          | 0.0129 | 0.1865 | 0.0161 | 0.0000 | 0.0091 | 0.2362 | 0.1726 | 0.0218 | 0.6423 | 0.2041 | 0.1832 | 0.0115 | 0.1524 | 0.0219 | 0.0000 |
| SPP1_E140_R          | 0.2215 | 0.0000 | 0.0074 | 0.0000 | 0.0084 | 0.0000 | 0.0117 | 0.0069 | 0.0159 | 0.0000 | 0.0056 | 0.0054 | 0.0040 | 0.0018 | 0.0000 |
| SRC_P297_F           | 0.0000 | 0.3202 | 0.0402 | 0.0000 | 0.9912 | 0.3901 | 0.0000 | 0.1862 | 0.9873 | 0.9955 | 0.0100 | 0.0446 | 0.1676 | 0.9501 | 0.9862 |



|                |        |        |        |        |        |        |        |        |        |        |        |        |        |        |        |
|----------------|--------|--------|--------|--------|--------|--------|--------|--------|--------|--------|--------|--------|--------|--------|--------|
| ST6GAL1_P164_R | 0.0000 | 0.0926 | 0.0000 | 0.0000 | 0.0507 | 0.0000 | 0.0000 | 0.0000 | 0.0608 | 0.0042 | 0.0000 | 0.0000 | 0.0626 | 0.1553 | 0.0000 |
| ST6GAL1_P528_F | 0.0000 | 0.0000 | 0.0000 | 0.0000 | 0.0036 | 0.0000 | 0.1340 | 0.0067 | 0.0077 | 0.0077 | 0.0044 | 0.0000 | 0.0000 | 0.0015 | 0.0000 |
| STK23_E182_R   | 0.0073 | 0.0064 | 0.0000 | 0.0000 | 0.0055 | 0.0000 | 0.0000 | 0.0000 | 0.7833 | 0.0000 | 0.0000 | 0.0116 | 0.9496 | 0.9870 | 0.9199 |
| SYK_E372_F     | 0.0049 | 0.0120 | 0.2874 | 0.2748 | 0.1887 | 0.4056 | 0.0129 | 0.0186 | 0.0162 | 0.0148 | 0.0668 | 0.0102 | 0.0912 | 0.0208 | 0.0000 |
| TAL1_E122_F    | 0.4446 | 0.0124 | 0.0079 | 0.7959 | 0.0086 | 0.5807 | 0.0094 | 0.2790 | 0.0077 | 0.0133 | 0.0089 | 0.0161 | 0.3449 | 0.0059 | 0.0000 |
| TAL1_P594_F    | 0.0000 | 0.0071 | 0.0000 | 0.0371 | 0.0057 | 0.0000 | 0.3072 | 0.0056 | 0.0011 | 0.0000 | 0.0000 | 0.0000 | 0.0000 | 0.0036 | 0.0000 |
| TAL1_P817_F    | 0.0000 | 0.0000 | 0.0000 | 0.1187 | 0.0000 | 0.0000 | 0.0000 | 0.0000 | 0.0000 | 0.0000 | 0.0000 | 0.0000 | 0.0000 | 0.0000 | 0.0000 |
| TCF4_P175_R    | 0.0000 | 0.0000 | 0.0000 | 0.0000 | 0.0000 | 0.0000 | 0.0000 | 0.0000 | 0.0000 | 0.0000 | 0.0000 | 0.0000 | 0.0000 | 0.0000 | 0.0000 |
| TCF7L2_E411_F  | 0.0000 | 0.0000 | 0.0004 | 0.0000 | 0.0033 | 0.0057 | 0.0000 | 0.0008 | 0.0001 | 0.0000 | 0.0045 | 0.0035 | 0.0000 | 0.0000 | 0.3989 |
| TCF7L2_P193_R  | 0.0059 | 0.0000 | 0.0000 | 0.0000 | 0.0086 | 0.0000 | 0.0000 | 0.6295 | 0.0039 | 0.0000 | 0.0037 | 0.0030 | 0.0048 | 0.0048 | 0.0000 |
| TERT_E20_F     | 0.0085 | 0.0089 | 0.0104 | 0.0000 | 0.0043 | 0.1646 | 0.0104 | 0.0128 | 0.0115 | 0.0119 | 0.0109 | 0.0161 | 0.0116 | 0.0090 | 0.0009 |
| TERT_P360_R    | 0.0123 | 0.0163 | 0.0174 | 0.8310 | 0.3011 | 0.0295 | 0.5313 | 0.0405 | 0.0133 | 0.5658 | 0.5776 | 0.4907 | 0.0170 | 0.0303 | 0.0000 |
| TES_E172_F     | 0.0015 | 0.0000 | 0.0044 | 0.0000 | 0.0000 | 0.0000 | 0.0000 | 0.0000 | 0.0051 | 0.2146 | 0.0024 | 0.0000 | 0.0049 | 0.0095 | 0.8685 |
| TESK2_P252_R   | 0.0065 | 0.0634 | 0.0058 | 0.0000 | 0.0534 | 0.0112 | 0.0059 | 0.0107 | 0.7062 | 0.0075 | 0.0053 | 0.0086 | 0.0050 | 0.0061 | 0.0000 |
| TFAP2C_E260_F  | 0.0000 | 0.0000 | 0.9921 | 0.0568 | 0.0047 | 0.0000 | 0.0000 | 0.0000 | 0.0047 | 0.0000 | 0.0000 | 0.0000 | 0.0000 | 0.0061 | 0.0000 |
| TFAP2C_P765_F  | 0.0000 | 0.0000 | 0.0108 | 0.0000 | 0.0000 | 0.0000 | 0.0000 | 0.0102 | 0.0093 | 0.0000 | 0.0000 | 0.0000 | 0.0000 | 0.0098 | 0.0000 |
| TFF2_P178_F    | 0.9791 | 0.1598 | 0.9271 | 0.5445 | 0.9572 | 0.0861 | 0.8079 | 0.9752 | 0.9375 | 0.8392 | 0.1346 | 0.2148 | 0.9830 | 0.8670 | 0.6908 |
| TFF2_P557_R    | 0.0000 | 0.9956 | 0.9956 | 0.7486 | 0.9927 | 0.2852 | 0.1858 | 0.9900 | 0.9788 | 0.0000 | 0.9941 | 0.9904 | 0.1175 | 0.9915 | 0.8616 |
| TFPI2_E141_F   | 0.0000 | 0.0004 | 0.0000 | 0.0000 | 0.0000 | 0.0000 | 0.0000 | 0.0000 | 0.0007 | 0.0000 | 0.0000 | 0.0000 | 0.0000 | 0.0028 | 0.0000 |
| TFPI2_P152_R   | 0.0866 | 0.3552 | 0.0172 | 0.0000 | 0.0184 | 0.5514 | 0.2046 | 0.0146 | 0.0305 | 0.3062 | 0.0189 | 0.3324 | 0.1688 | 0.0317 | 0.0000 |
| TFPI2_P9_F     | 0.5792 | 0.0088 | 0.5279 | 0.7182 | 0.5039 | 0.6332 | 0.4438 | 0.0167 | 0.0135 | 0.6850 | 0.5275 | 0.0158 | 0.0200 | 0.0189 | 0.0000 |
| TFRC_P414_R    | 0.3905 | 0.3707 | 0.0288 | 0.1518 | 0.0193 | 0.2068 | 0.0054 | 0.0182 | 0.0082 | 0.0945 | 0.0135 | 0.0056 | 0.0020 | 0.0027 | 0.0000 |
| TGFA_P558_F    | 0.0000 | 0.0000 | 0.0017 | 0.0000 | 0.0000 | 0.0036 | 0.0003 | 0.0138 | 0.0149 | 0.0000 | 0.4317 | 0.0000 | 0.0050 | 0.0123 | 0.0000 |
| TGFA_P642_R    | 0.0000 | 0.0000 | 0.0000 | 0.0000 | 0.0030 | 0.1394 | 0.0000 | 0.0072 | 0.0077 | 0.9785 | 0.0043 | 0.0029 | 0.0052 | 0.0060 | 0.0000 |
| TGFB1_P833_R   | 0.0000 | 0.0000 | 0.6719 | 0.0000 | 0.0000 | 0.0000 | 0.0000 | 0.0012 | 0.9430 | 0.9921 | 0.0000 | 0.9920 | 0.0000 | 0.9837 | 0.0000 |
| TGFB2_E226_R   | 0.0000 | 0.0000 | 0.0000 | 0.0000 | 0.0000 | 0.0000 | 0.0000 | 0.0000 | 0.0000 | 0.0000 | 0.0015 | 0.0000 | 0.0000 | 0.0000 | 0.0000 |
| TGFB2_P632_F   | 0.0073 | 0.0136 | 0.0101 | 0.4986 | 0.0154 | 0.3287 | 0.0092 | 0.0181 | 0.0135 | 0.0114 | 0.0094 | 0.0110 | 0.2474 | 0.0166 | 0.0000 |
| TGFB3_E58_R    | 0.9922 | 0.9957 | 0.8712 | 0.0000 | 0.7930 | 0.0000 | 0.9884 | 0.9877 | 0.9879 | 0.9944 | 0.9917 | 0.9893 | 0.0001 | 0.8269 | 0.7803 |
| TGFBI_P173_F   | 0.1850 | 0.1119 | 0.0497 | 0.7122 | 0.1087 | 0.1162 | 0.0113 | 0.0127 | 0.8905 | 0.0555 | 0.0092 | 0.0267 | 0.0084 | 0.0125 | 0.0000 |
| TGFBI_P31_R    | 0.0071 | 0.0000 | 0.0104 | 0.0000 | 0.0061 | 0.0000 | 0.0000 | 0.0086 | 0.0514 | 0.0091 | 0.2004 | 0.0081 | 0.0067 | 0.5891 | 0.2052 |
| TGFBR3_E188_R  | 0.0046 | 0.0068 | 0.0018 | 0.0000 | 0.0000 | 0.0000 | 0.0052 | 0.0035 | 0.0030 | 0.0000 | 0.0032 | 0.0020 | 0.0000 | 0.0029 | 0.0000 |
| TGFBR3_P429_F  | 0.0042 | 0.0000 | 0.0000 | 0.0000 | 0.0011 | 0.0000 | 0.0000 | 0.0000 | 0.0019 | 0.0000 | 0.0032 | 0.0000 | 0.0000 | 0.0038 | 0.0000 |
| THBS1_E207_R   | 0.0000 | 0.0000 | 0.0000 | 0.0000 | 0.0000 | 0.0067 | 0.1748 | 0.0000 | 0.0055 | 0.0000 | 0.0056 | 0.0039 | 0.0122 | 0.0000 | 0.0000 |

|                   |        |        |        |        |        |        |        |        |        |        |        |        |        |        |        |
|-------------------|--------|--------|--------|--------|--------|--------|--------|--------|--------|--------|--------|--------|--------|--------|--------|
| THBS1_P500_F      | 0.0055 | 0.0128 | 0.0077 | 0.0000 | 0.0095 | 0.0111 | 0.0147 | 0.0183 | 0.0143 | 0.0089 | 0.0065 | 0.0231 | 0.0038 | 0.0101 | 0.0000 |
| THBS2_E129_F      | 0.0032 | 0.0057 | 0.0000 | 0.0000 | 0.0024 | 0.1100 | 0.0028 | 0.0059 | 0.0079 | 0.0014 | 0.0027 | 0.0000 | 0.0028 | 0.0013 | 0.0000 |
| THY1_P149_R       | 0.1412 | 0.1916 | 0.0235 | 0.0000 | 0.0263 | 0.3446 | 0.2602 | 0.0216 | 0.0296 | 0.3436 | 0.3218 | 0.6395 | 0.0101 | 0.0169 | 0.0000 |
| TIAM1_P188_R      | 0.0030 | 0.0041 | 0.0033 | 0.0000 | 0.0004 | 0.0000 | 0.0000 | 0.0095 | 0.0000 | 0.0000 | 0.0017 | 0.0022 | 0.0000 | 0.0026 | 0.0000 |
| TIMP1_E254_R      | 0.8030 | 0.0068 | 0.0066 | 0.0000 | 0.0094 | 0.0566 | 0.0182 | 0.0164 | 0.0152 | 0.0116 | 0.0085 | 0.0154 | 0.0151 | 0.9677 | 0.7087 |
| TIMP1_P615_R      | 0.0000 | 0.0000 | 0.0000 | 0.0000 | 0.0000 | 0.0000 | 0.0000 | 0.1421 | 0.0000 | 0.0000 | 0.9836 | 0.0000 | 0.9624 | 0.0000 | 0.0115 |
| TIMP2_E394_R      | 0.0000 | 0.0767 | 0.0015 | 0.0000 | 0.0000 | 0.0000 | 0.0559 | 0.1191 | 0.0141 | 0.0015 | 0.0081 | 0.0000 | 0.0026 | 0.0987 | 0.0000 |
| TIMP2_P267_F      | 0.0055 | 0.0076 | 0.0030 | 0.0022 | 0.0008 | 0.0083 | 0.0060 | 0.0032 | 0.0024 | 0.0044 | 0.0000 | 0.0032 | 0.0007 | 0.0000 | 0.0000 |
| TIMP3_P1114_R     | 0.9936 | 0.7403 | 0.9922 | 0.0000 | 0.9877 | 0.3668 | 0.3713 | 0.9879 | 0.9824 | 0.1307 | 0.9933 | 0.9895 | 0.9899 | 0.9870 | 0.9910 |
| TIMP3_P690_R      | 0.0000 | 0.0000 | 0.9931 | 0.0000 | 0.9932 | 0.0000 | 0.0000 | 0.9846 | 0.9880 | 0.9952 | 0.9919 | 0.9889 | 0.6185 | 0.9918 | 0.9722 |
| TIMP3_seq_7_S38_F | 0.2197 | 0.2248 | 0.3185 | 0.5966 | 0.0064 | 0.6055 | 0.0000 | 0.0103 | 0.0093 | 0.0550 | 0.1465 | 0.1435 | 0.0060 | 0.0052 | 0.2951 |
| TJP1_P326_R       | 0.0817 | 0.0823 | 0.0129 | 0.0179 | 0.1245 | 0.0815 | 0.0099 | 0.0133 | 0.0136 | 0.0247 | 0.0154 | 0.0258 | 0.0096 | 0.0191 | 0.0000 |
| TJP1_P390_F       | 0.0047 | 0.0553 | 0.0111 | 0.0000 | 0.0042 | 0.0000 | 0.0000 | 0.0122 | 0.0089 | 0.0000 | 0.0072 | 0.0049 | 0.0102 | 0.0018 | 0.0000 |
| TK1_E47_F         | 0.4157 | 0.0264 | 0.2337 | 0.2363 | 0.1325 | 0.4297 | 0.4087 | 0.0578 | 0.0422 | 0.0169 | 0.2796 | 0.3684 | 0.0327 | 0.0103 | 0.0000 |
| TK1_P62_R         | 0.0025 | 0.0111 | 0.0070 | 0.0000 | 0.0000 | 0.4550 | 0.3628 | 0.0108 | 0.0078 | 0.0000 | 0.0090 | 0.0115 | 0.0000 | 0.0079 | 0.0000 |
| TMEFF1_E180_R     | 0.0133 | 0.0000 | 0.0095 | 0.0000 | 0.0000 | 0.0000 | 0.0000 | 0.0000 | 0.0097 | 0.0000 | 0.0000 | 0.0000 | 0.0040 | 0.0069 | 0.0000 |
| TMEFF1_P234_F     | 0.0000 | 0.0000 | 0.0062 | 0.0000 | 0.0000 | 0.0000 | 0.0000 | 0.4234 | 0.0032 | 0.0000 | 0.0049 | 0.0038 | 0.0000 | 0.0000 | 0.0000 |
| TMEFF2_P152_R     | 0.0624 | 0.3437 | 0.3178 | 0.1420 | 0.3483 | 0.3959 | 0.3844 | 0.0860 | 0.0617 | 0.3701 | 0.0574 | 0.0946 | 0.0563 | 0.0757 | 0.7989 |
| TMEFF2_P210_R     | 0.0000 | 0.0000 | 0.0574 | 0.0000 | 0.0000 | 0.0000 | 0.0036 | 0.0000 | 0.0000 | 0.0000 | 0.0000 | 0.0000 | 0.0000 | 0.0000 | 0.0000 |
| TMEM63A_E63_F     | 0.0000 | 0.0000 | 0.0024 | 0.0000 | 0.0000 | 0.0000 | 0.0015 | 0.0000 | 0.0000 | 0.0000 | 0.0000 | 0.0026 | 0.0000 | 0.0000 | 0.0000 |
| TMPRSS4_E83_F     | 0.0107 | 0.0000 | 0.9915 | 0.0000 | 0.0908 | 0.0000 | 0.9945 | 0.4510 | 0.9840 | 0.0000 | 0.9895 | 0.9891 | 0.0819 | 0.9831 | 0.9852 |
| TMPRSS4_P552_F    | 0.9929 | 0.6335 | 0.9923 | 0.3394 | 0.0188 | 0.7087 | 0.1337 | 0.0474 | 0.9220 | 0.4997 | 0.9925 | 0.8593 | 0.9901 | 0.0174 | 0.9548 |
| TNC_P198_F        | 0.0000 | 0.0862 | 0.0027 | 0.0000 | 0.0000 | 0.0000 | 0.0000 | 0.0000 | 0.0000 | 0.0000 | 0.0000 | 0.0000 | 0.0000 | 0.6251 | 0.0000 |
| TNC_P57_F         | 0.0120 | 0.0131 | 0.0109 | 0.2090 | 0.1758 | 0.6553 | 0.0083 | 0.0114 | 0.0104 | 0.0136 | 0.0084 | 0.0134 | 0.0109 | 0.4558 | 0.7431 |
| TNF_P1084_F       | 0.6783 | 0.3617 | 0.0142 | 0.0000 | 0.5296 | 0.9971 | 0.2195 | 0.9885 | 0.9791 | 0.0247 | 0.9922 | 0.9902 | 0.3216 | 0.9927 | 0.9326 |
| TNF_P158_F        | 0.0000 | 0.0000 | 0.0016 | 0.0000 | 0.0017 | 0.0000 | 0.0000 | 0.0055 | 0.0045 | 0.0000 | 0.0000 | 0.0068 | 0.0079 | 0.0000 | 0.5531 |
| TNFRSF10A_P171_F  | 0.0065 | 0.1119 | 0.0798 | 0.0000 | 0.0092 | 0.2454 | 0.0804 | 0.0103 | 0.0106 | 0.0079 | 0.0065 | 0.0144 | 0.0083 | 0.0063 | 0.0000 |
| TNFRSF10A_P91_F   | 0.0000 | 0.0000 | 0.0000 | 0.0000 | 0.0070 | 0.0000 | 0.0000 | 0.0064 | 0.0045 | 0.0000 | 0.0047 | 0.0033 | 0.0000 | 0.0053 | 0.0000 |
| TNFRSF10B_P108_R  | 0.0184 | 0.0154 | 0.0907 | 0.0000 | 0.1113 | 0.0074 | 0.0637 | 0.0226 | 0.0251 | 0.0684 | 0.0195 | 0.0776 | 0.0140 | 0.0222 | 0.0085 |
| TNFRSF10C_E109_F  | 0.0028 | 0.2078 | 0.0000 | 0.0000 | 0.0015 | 0.2198 | 0.1401 | 0.0050 | 0.0028 | 0.0064 | 0.0458 | 0.0073 | 0.0062 | 0.0057 | 0.0000 |
| TNFRSF10D_E27_F   | 0.0000 | 0.0100 | 0.0013 | 0.0119 | 0.0040 | 0.0059 | 0.0055 | 0.0092 | 0.0068 | 0.0076 | 0.0053 | 0.0112 | 0.0028 | 0.0083 | 0.0000 |
| TNFRSF10D_P70_F   | 0.0047 | 0.0076 | 0.0108 | 0.0000 | 0.0079 | 0.0875 | 0.0130 | 0.1382 | 0.0297 | 0.0144 | 0.0149 | 0.0228 | 0.0122 | 0.0351 | 0.0000 |
| TNFRSF1B_E5_F     | 0.0000 | 0.0130 | 0.0000 | 0.0000 | 0.0000 | 0.0000 | 0.0000 | 0.0121 | 0.0131 | 0.0112 | 0.0112 | 0.9762 | 0.0097 | 0.0000 | 0.0000 |

|                   |        |        |        |        |        |        |        |        |        |        |        |        |        |        |        |
|-------------------|--------|--------|--------|--------|--------|--------|--------|--------|--------|--------|--------|--------|--------|--------|--------|
| TNFRSF1B_P167_F   | 0.0052 | 0.0021 | 0.0000 | 0.0000 | 0.0011 | 0.0000 | 0.0071 | 0.0058 | 0.0063 | 0.0017 | 0.0000 | 0.0033 | 0.9881 | 0.0019 | 0.0000 |
| TNFSF10_E53_F     | 0.0803 | 0.1160 | 0.4934 | 0.0000 | 0.0032 | 0.0155 | 0.0000 | 0.0090 | 0.0143 | 0.5704 | 0.0052 | 0.4775 | 0.0155 | 0.0000 | 0.0000 |
| TNFSF10_P2_R      | 0.0008 | 0.0000 | 0.0000 | 0.0000 | 0.0000 | 0.0000 | 0.0000 | 0.0083 | 0.0000 | 0.0000 | 0.0000 | 0.0000 | 0.0058 | 0.0000 | 0.0000 |
| TNFSF8_E258_R     | 0.0000 | 0.0053 | 0.0000 | 0.0000 | 0.0012 | 0.0000 | 0.0000 | 0.0062 | 0.0045 | 0.0058 | 0.0054 | 0.0058 | 0.0000 | 0.0001 | 0.0000 |
| TNFSF8_P184_F     | 0.0018 | 0.0000 | 0.0000 | 0.0000 | 0.0021 | 0.0031 | 0.0040 | 0.0056 | 0.0035 | 0.0000 | 0.0034 | 0.0067 | 0.0176 | 0.0025 | 0.0000 |
| TNK1_P41_R        | 0.0238 | 0.0109 | 0.0092 | 0.2412 | 0.0229 | 0.4487 | 0.0103 | 0.0134 | 0.0229 | 0.0107 | 0.5649 | 0.0393 | 0.0036 | 0.0045 | 0.6841 |
| TP73_E155_F       | 0.4352 | 0.0094 | 0.0209 | 0.6125 | 0.5410 | 0.6639 | 0.0081 | 0.0381 | 0.0102 | 0.3329 | 0.0110 | 0.0129 | 0.4474 | 0.0076 | 0.0000 |
| TP73_P496_F       | 0.0000 | 0.0076 | 0.0013 | 0.0000 | 0.0047 | 0.0041 | 0.0000 | 0.0040 | 0.5259 | 0.0077 | 0.0000 | 0.0078 | 0.0079 | 0.0000 | 0.0000 |
| TP73_P945_F       | 0.0090 | 0.0087 | 0.1797 | 0.0000 | 0.0039 | 0.0059 | 0.0097 | 0.0110 | 0.0084 | 0.0000 | 0.0081 | 0.0112 | 0.0448 | 0.0100 | 0.0000 |
| TPEF_seq_44_S36_F | 0.0052 | 0.0000 | 0.0000 | 0.0000 | 0.0031 | 0.0000 | 0.0000 | 0.0142 | 0.0067 | 0.0095 | 0.0000 | 0.0078 | 0.0000 | 0.0000 | 0.0000 |
| TPEF_seq_44_S88_R | 0.0083 | 0.0048 | 0.0056 | 0.0000 | 0.0064 | 0.0813 | 0.0319 | 0.0092 | 0.5013 | 0.0148 | 0.0082 | 0.2121 | 0.0841 | 0.5827 | 0.0000 |
| TRIM29_P261_F     | 0.0413 | 0.9948 | 0.8020 | 0.9775 | 0.9897 | 0.9057 | 0.0307 | 0.9614 | 0.9827 | 0.9939 | 0.7746 | 0.9882 | 0.7546 | 0.6019 | 0.9704 |
| TRIP6_E33_F       | 0.0083 | 0.2820 | 0.0432 | 0.0000 | 0.2148 | 0.0000 | 0.0000 | 0.0138 | 0.0108 | 0.0069 | 0.2233 | 0.1907 | 0.0052 | 0.0084 | 0.0000 |
| TSG101_P257_R     | 0.0000 | 0.0057 | 0.0000 | 0.0000 | 0.0000 | 0.0000 | 0.0030 | 0.0024 | 0.0012 | 0.0024 | 0.0071 | 0.0000 | 0.0000 | 0.0000 | 0.0000 |
| TUBB3_E91_F       | 0.0000 | 0.0024 | 0.0022 | 0.1580 | 0.0022 | 0.0000 | 0.0000 | 0.0011 | 0.2299 | 0.0012 | 0.0007 | 0.0009 | 0.0016 | 0.2276 | 0.1037 |
| TUBB3_P364_F      | 0.0000 | 0.0000 | 0.0000 | 0.0000 | 0.0000 | 0.0000 | 0.0000 | 0.0000 | 0.0000 | 0.0000 | 0.0000 | 0.0000 | 0.0000 | 0.0000 | 0.0000 |
| TUBB3_P721_R      | 0.0000 | 0.0000 | 0.0026 | 0.0000 | 0.0000 | 0.0000 | 0.0000 | 0.0000 | 0.0084 | 0.0012 | 0.0015 | 0.0045 | 0.0000 | 0.0000 | 0.0000 |
| TUSC3_E29_R       | 0.0077 | 0.0000 | 0.0102 | 0.0000 | 0.0271 | 0.3595 | 0.0000 | 0.0069 | 0.0086 | 0.0106 | 0.0531 | 0.0084 | 0.0034 | 0.0055 | 0.0000 |
| TUSC3_P85_R       | 0.0000 | 0.0000 | 0.0059 | 0.0000 | 0.0029 | 0.0000 | 0.0000 | 0.0121 | 0.0167 | 0.0156 | 0.0180 | 0.0063 | 0.0000 | 0.0021 | 0.0000 |
| TWIST1_E117_R     | 0.0000 | 0.0000 | 0.0000 | 0.0000 | 0.0000 | 0.0000 | 0.0030 | 0.0000 | 0.0000 | 0.0000 | 0.0000 | 0.0000 | 0.0024 | 0.0000 | 0.0000 |
| TWIST1_P355_R     | 0.0063 | 0.0058 | 0.0142 | 0.0000 | 0.2625 | 0.0000 | 0.0000 | 0.0015 | 0.0093 | 0.0000 | 0.0004 | 0.1605 | 0.0036 | 0.0064 | 0.0000 |
| TWIST1_P44_R      | 0.0000 | 0.0000 | 0.0000 | 0.0000 | 0.0000 | 0.0000 | 0.0000 | 0.0000 | 0.0000 | 0.0000 | 0.0011 | 0.0000 | 0.0000 | 0.0000 | 0.0000 |
| TYRO3_P501_F      | 0.0000 | 0.0000 | 0.0001 | 0.0000 | 0.0000 | 0.0000 | 0.0034 | 0.0000 | 0.0033 | 0.0000 | 0.0000 | 0.0036 | 0.0034 | 0.0018 | 0.0000 |
| UBA52_P293_R      | 0.0000 | 0.0037 | 0.0000 | 0.0000 | 0.0000 | 0.0000 | 0.0000 | 0.0000 | 0.0034 | 0.0000 | 0.0000 | 0.0096 | 0.0000 | 0.0003 | 0.0000 |
| UGT1A1_E11_F      | 0.9440 | 0.0000 | 0.0000 | 0.0000 | 0.0000 | 0.0000 | 0.0000 | 0.9862 | 0.9852 | 0.0000 | 0.9921 | 0.9861 | 0.9350 | 0.9871 | 0.9730 |
| UGT1A1_P564_R     | 0.9477 | 0.6649 | 0.9557 | 0.3289 | 0.9318 | 0.6901 | 0.8416 | 0.9061 | 0.9077 | 0.6708 | 0.9217 | 0.9630 | 0.9350 | 0.8976 | 0.8635 |
| UGT1A7_P751_R     | 0.9913 | 0.9945 | 0.0000 | 0.0000 | 0.9914 | 0.0000 | 0.9927 | 0.9875 | 0.9853 | 0.0000 | 0.9922 | 0.9867 | 0.9922 | 0.9869 | 0.0000 |
| UNG_P170_F        | 0.0008 | 0.1234 | 0.0038 | 0.0000 | 0.0067 | 0.0000 | 0.0090 | 0.0070 | 0.0068 | 0.0109 | 0.0383 | 0.0087 | 0.0035 | 0.0046 | 0.0000 |
| USP29_E274_F      | 0.9929 | 0.9950 | 0.9906 | 0.0000 | 0.9924 | 0.9897 | 0.9941 | 0.9849 | 0.9848 | 0.0000 | 0.9914 | 0.9445 | 0.9921 | 0.9838 | 0.8925 |
| USP29_P282_R      | 0.0000 | 0.0000 | 0.9921 | 0.0000 | 0.9909 | 0.0000 | 0.0000 | 0.8233 | 0.9853 | 0.0000 | 0.0000 | 0.9881 | 0.9643 | 0.9869 | 0.9883 |
| VAMP8_P114_F      | 0.0129 | 0.0095 | 0.0136 | 0.0000 | 0.2805 | 0.0625 | 0.1421 | 0.0327 | 0.0123 | 0.0112 | 0.0101 | 0.0114 | 0.0126 | 0.0100 | 0.0000 |
| VAV1_E9_F         | 0.0000 | 0.0000 | 0.0000 | 0.0000 | 0.0000 | 0.0000 | 0.7440 | 0.0000 | 0.0128 | 0.0222 | 0.0053 | 0.0092 | 0.0075 | 0.0044 | 0.0000 |
| VAV1_P317_F       | 0.0033 | 0.0000 | 0.0000 | 0.0000 | 0.0000 | 0.0000 | 0.0000 | 0.0023 | 0.0051 | 0.0059 | 0.0000 | 0.0000 | 0.0013 | 0.0018 | 0.0000 |

|                |        |        |        |        |        |        |        |        |        |        |        |        |        |        |        |
|----------------|--------|--------|--------|--------|--------|--------|--------|--------|--------|--------|--------|--------|--------|--------|--------|
| VAV2_E58_F     | 0.1587 | 0.0333 | 0.1639 | 0.0000 | 0.1960 | 0.1726 | 0.1921 | 0.0171 | 0.0143 | 0.0142 | 0.0212 | 0.0983 | 0.1045 | 0.1040 | 0.0000 |
| VAV2_P1182_F   | 0.0000 | 0.0000 | 0.0000 | 0.0000 | 0.9858 | 0.0000 | 0.0000 | 0.0049 | 0.0070 | 0.0000 | 0.0000 | 0.0008 | 0.0000 | 0.0076 | 0.0000 |
| VBP1_P12_R     | 0.0295 | 0.0000 | 0.0000 | 0.0000 | 0.0000 | 0.0171 | 0.0000 | 0.0044 | 0.0003 | 0.0221 | 0.0286 | 0.0107 | 0.9735 | 0.0000 | 0.0000 |
| VEGFB_P658_F   | 0.0064 | 0.0055 | 0.0048 | 0.0026 | 0.0067 | 0.0071 | 0.3226 | 0.0101 | 0.0090 | 0.0060 | 0.0346 | 0.0094 | 0.7680 | 0.0052 | 0.0000 |
| VIM_P811_R     | 0.0000 | 0.0000 | 0.0000 | 0.0000 | 0.0000 | 0.0000 | 0.0000 | 0.0000 | 0.0000 | 0.0000 | 0.0040 | 0.0000 | 0.0011 | 0.0068 | 0.0000 |
| WEE1_P924_R    | 0.0000 | 0.0509 | 0.9923 | 0.0000 | 0.0000 | 0.0000 | 0.9950 | 0.9236 | 0.9103 | 0.0000 | 0.0000 | 0.7337 | 0.9912 | 0.6975 | 0.9769 |
| WNT2_E109_R    | 0.0000 | 0.0000 | 0.0000 | 0.0000 | 0.0000 | 0.0000 | 0.0000 | 0.0000 | 0.0000 | 0.0000 | 0.0000 | 0.0000 | 0.0000 | 0.0000 | 0.0000 |
| WNT2_P217_F    | 0.1963 | 0.2358 | 0.2094 | 0.6473 | 0.0209 | 0.0110 | 0.0341 | 0.0313 | 0.0262 | 0.0279 | 0.2072 | 0.0294 | 0.2029 | 0.0275 | 0.0103 |
| WNT2B_P1185_R  | 0.4902 | 0.0000 | 0.0138 | 0.0000 | 0.0150 | 0.0000 | 0.0227 | 0.0163 | 0.0238 | 0.0000 | 0.0191 | 0.0150 | 0.0000 | 0.0408 | 0.0000 |
| WNT5A_E43_F    | 0.0165 | 0.2159 | 0.0483 | 0.0563 | 0.7264 | 0.2707 | 0.0112 | 0.0132 | 0.0139 | 0.0184 | 0.0124 | 0.0125 | 0.0185 | 0.0153 | 0.0000 |
| WNT5A_P655_F   | 0.0045 | 0.0000 | 0.0043 | 0.0000 | 0.0026 | 0.0058 | 0.0000 | 0.5126 | 0.0063 | 0.0000 | 0.0074 | 0.0045 | 0.0020 | 0.0051 | 0.0000 |
| WNT8B_E487_F   | 0.4761 | 0.0138 | 0.2937 | 0.6900 | 0.4918 | 0.9943 | 0.0299 | 0.0244 | 0.9346 | 0.0201 | 0.4120 | 0.5890 | 0.3773 | 0.3631 | 0.0000 |
| WNT8B_P216_R   | 0.0000 | 0.0000 | 0.0000 | 0.0000 | 0.0000 | 0.0000 | 0.0000 | 0.9862 | 0.9816 | 0.0000 | 0.0000 | 0.9844 | 0.0000 | 0.9787 | 0.9646 |
| WRN_E57_F      | 0.2539 | 0.2122 | 0.5556 | 0.0224 | 0.0099 | 0.1574 | 0.2400 | 0.4195 | 0.0210 | 0.2492 | 0.0196 | 0.0133 | 0.3640 | 0.0234 | 0.9699 |
| WRN_P969_F     | 0.0070 | 0.0074 | 0.0000 | 0.0000 | 0.9896 | 0.3328 | 0.0000 | 0.9825 | 0.9696 | 0.0000 | 0.0000 | 0.9879 | 0.0000 | 0.8146 | 0.9876 |
| WT1_E32_F      | 0.0068 | 0.0108 | 0.0084 | 0.0000 | 0.0000 | 0.0000 | 0.5083 | 0.0192 | 0.0072 | 0.0000 | 0.0036 | 0.0000 | 0.0072 | 0.0190 | 0.0000 |
| WT1_P853_F     | 0.0030 | 0.0076 | 0.0047 | 0.0000 | 0.0033 | 0.0060 | 0.0000 | 0.0024 | 0.0042 | 0.0000 | 0.0000 | 0.0083 | 0.0039 | 0.0021 | 0.0000 |
| XRCC1_P681_R   | 0.9921 | 0.0223 | 0.9877 | 0.0000 | 0.8705 | 0.9955 | 0.0000 | 0.9811 | 0.7805 | 0.0069 | 0.9917 | 0.9885 | 0.0081 | 0.9849 | 0.9619 |
| XRCC2_P1077_F  | 0.0000 | 0.9935 | 0.3067 | 0.0000 | 0.0000 | 0.9964 | 0.7527 | 0.9902 | 0.9855 | 0.0032 | 0.9904 | 0.9909 | 0.0000 | 0.9918 | 0.9882 |
| YES1_P600_F    | 0.0000 | 0.2416 | 0.0091 | 0.0000 | 0.0088 | 0.4837 | 0.0453 | 0.0165 | 0.0149 | 0.0141 | 0.1825 | 0.0176 | 0.0210 | 0.0206 | 0.0000 |
| ZIM3_E203_F    | 0.0000 | 0.0000 | 0.9913 | 0.0000 | 0.9905 | 0.0000 | 0.9926 | 0.9860 | 0.9856 | 0.0000 | 0.9910 | 0.9909 | 0.9897 | 0.9883 | 0.8720 |
| ZIM3_P451_R    | 0.9896 | 0.0000 | 0.9889 | 0.0000 | 0.9909 | 0.9968 | 0.9918 | 0.9852 | 0.9852 | 0.9930 | 0.9931 | 0.9858 | 0.9879 | 0.9862 | 0.9899 |
| ZIM3_P718_R    | 0.0000 | 0.0000 | 0.0000 | 0.0000 | 0.0000 | 0.0019 | 0.0000 | 0.9859 | 0.9857 | 0.0000 | 0.9916 | 0.8033 | 0.0008 | 0.9821 | 0.9155 |
| ZMYND10_E77_R  | 0.0000 | 0.0034 | 0.0019 | 0.0000 | 0.0000 | 0.0000 | 0.0022 | 0.0001 | 0.0000 | 0.0012 | 0.0000 | 0.8672 | 0.0000 | 0.0032 | 0.0000 |
| ZNF215_P71_R   | 0.9922 | 0.0309 | 0.0048 | 0.0000 | 0.0143 | 0.0042 | 0.0059 | 0.0069 | 0.4338 | 0.0000 | 0.0671 | 0.0070 | 0.0074 | 0.0037 | 0.0000 |
| ZNF264_E48_R   | 0.0000 | 0.0000 | 0.0000 | 0.0000 | 0.0000 | 0.0000 | 0.0023 | 0.0000 | 0.0000 | 0.0070 | 0.0000 | 0.0000 | 0.0000 | 0.0000 | 0.0000 |
| ZNFN1A1_E102_F | 0.9826 | 0.2710 | 0.1093 | 0.0000 | 0.7436 | 0.0000 | 0.4674 | 0.0294 | 0.9216 | 0.0000 | 0.9876 | 0.4258 | 0.9859 | 0.8596 | 0.9756 |
| ZNFN1A1_P179_F | 0.0000 | 0.9951 | 0.9941 | 0.4896 | 0.1650 | 0.0000 | 0.9946 | 0.9866 | 0.9845 | 0.9942 | 0.9925 | 0.9935 | 0.9906 | 0.9886 | 0.9522 |

| TargetID        | BWS47  | BWS48  | BWS49  | BWS50  | BWS51  | CONTROL_ | CONTROL_ | CONTROL_ | CONTROL_ | CONTROL_ | CONTROL_ | CONTROL_ |
|-----------------|--------|--------|--------|--------|--------|----------|----------|----------|----------|----------|----------|----------|
|                 |        |        |        |        |        | 1        | 2        | 3a       | 3b       | 4        | 5        | 6        |
| AATK_E63_R      | 0.9867 | 0.0707 | 0.9121 | 0.9833 | 0.0143 | 0.9851   | 0.0000   | 0.9883   | 0.9881   | 0.0000   | 0.9876   | 0.1147   |
| ABCA1_E120_R    | 0.9793 | 0.9922 | 0.9849 | 0.9833 | 0.9802 | 0.9847   | 0.9950   | 0.9815   | 0.9776   | 0.9906   | 0.9879   | 0.9922   |
| ABCA1_P45_F     | 0.9836 | 0.9887 | 0.9865 | 0.9835 | 0.0000 | 0.9814   | 0.9927   | 0.0000   | 0.9840   | 0.9886   | 0.9771   | 0.0000   |
| ABCB4_E429_F    | 0.0017 | 0.0191 | 0.0016 | 0.0054 | 0.0053 | 0.0043   | 0.0000   | 0.0046   | 0.0011   | 0.0042   | 0.0069   | 0.0011   |
| ABCC2_P88_F     | 0.0160 | 0.0200 | 0.0186 | 0.2939 | 0.0217 | 0.1765   | 0.1587   | 0.0379   | 0.7520   | 0.0784   | 0.0263   | 0.9906   |
| ABCC5_P444_F    | 0.0094 | 0.0093 | 0.0083 | 0.0088 | 0.0104 | 0.1014   | 0.0051   | 0.1738   | 0.1168   | 0.0065   | 0.0087   | 0.0058   |
| ABCG2_P178_R    | 0.5071 | 0.4678 | 0.0333 | 0.4095 | 0.4459 | 0.0267   | 0.0508   | 0.6394   | 0.0322   | 0.5401   | 0.0549   | 0.3815   |
| ABCG2_P310_R    | 0.9855 | 0.9903 | 0.9882 | 0.9715 | 0.9802 | 0.9794   | 0.0000   | 0.9865   | 0.9846   | 0.0000   | 0.9802   | 0.9678   |
| ABL1_P53_F      | 0.9897 | 0.7812 | 0.9888 | 0.9751 | 0.9742 | 0.9786   | 0.9882   | 0.9927   | 0.9846   | 0.9862   | 0.4724   | 0.9651   |
| ABL2_P459_R     | 0.6818 | 0.0000 | 0.0000 | 0.0000 | 0.0000 | 0.1443   | 0.0079   | 0.0017   | 0.0000   | 0.0024   | 0.0000   | 0.0000   |
| ABO_E110_F      | 0.7102 | 0.9892 | 0.0055 | 0.0292 | 0.0444 | 0.2694   | 0.0000   | 0.8201   | 0.0050   | 0.0075   | 0.0155   | 0.0044   |
| ABO_P312_F      | 0.0071 | 0.0103 | 0.2329 | 0.2342 | 0.3203 | 0.1037   | 0.0096   | 0.0110   | 0.4583   | 0.0113   | 0.3331   | 0.0664   |
| ACTG2_P455_R    | 0.0000 | 0.0000 | 0.0000 | 0.0000 | 0.0000 | 0.0000   | 0.8437   | 0.0000   | 0.0000   | 0.0888   | 0.0055   | 0.2316   |
| ACVR1_P983_F    | 0.0000 | 0.0000 | 0.0000 | 0.0014 | 0.0050 | 0.0000   | 0.0019   | 0.0000   | 0.0000   | 0.0022   | 0.0000   | 0.0022   |
| ACVR1B_E497_R   | 0.0073 | 0.0057 | 0.0170 | 0.0075 | 0.0084 | 0.0063   | 0.0078   | 0.0000   | 0.0001   | 0.0049   | 0.0065   | 0.1800   |
| ACVR1B_P572_R   | 0.0138 | 0.0101 | 0.0768 | 0.0242 | 0.0216 | 0.0114   | 0.0138   | 0.0170   | 0.0106   | 0.0146   | 0.0160   | 0.0121   |
| ACVR1C_P115_R   | 0.0049 | 0.0046 | 0.0000 | 0.0036 | 0.0070 | 0.0000   | 0.0068   | 0.0000   | 0.0019   | 0.0058   | 0.0054   | 0.0000   |
| ACVR1C_P363_F   | 0.9899 | 0.9883 | 0.9557 | 0.9822 | 0.9921 | 0.9857   | 0.9961   | 0.9176   | 0.9894   | 0.9900   | 0.9928   | 0.9919   |
| ACVR2B_E27_R    | 0.9855 | 0.9832 | 0.7840 | 0.9814 | 0.8076 | 0.9711   | 0.9931   | 0.6073   | 0.5586   | 0.9818   | 0.0284   | 0.0373   |
| ACVR2B_P676_F   | 0.0000 | 0.0000 | 0.0000 | 0.0000 | 0.0000 | 0.0000   | 0.0000   | 0.0000   | 0.0000   | 0.0000   | 0.0000   | 0.0000   |
| ADAMTS12_P250_R | 0.0008 | 0.0000 | 0.0017 | 0.0000 | 0.0087 | 0.0000   | 0.0000   | 0.0038   | 0.0000   | 0.0000   | 0.0040   | 0.0000   |
| ADCYAP1_E163_R  | 0.0000 | 0.1341 | 0.0040 | 0.0110 | 0.0841 | 0.0062   | 0.0000   | 0.0000   | 0.0051   | 0.0085   | 0.0064   | 0.0679   |
| ADCYAP1_P398_F  | 0.9848 | 0.2664 | 0.9830 | 0.9112 | 0.9614 | 0.9728   | 0.9557   | 0.8948   | 0.9880   | 0.9847   | 0.3783   | 0.9272   |
| ADCYAP1_P455_R  | 0.0241 | 0.0113 | 0.0144 | 0.0791 | 0.0112 | 0.0644   | 0.0155   | 0.7583   | 0.2390   | 0.0206   | 0.5657   | 0.0189   |
| AFF3_P122_F     | 0.0031 | 0.0063 | 0.0034 | 0.1982 | 0.0092 | 0.0722   | 0.0070   | 0.0079   | 0.0006   | 0.0043   | 0.0086   | 0.0000   |
| AFF3_P808_F     | 0.0000 | 0.0044 | 0.0027 | 0.4923 | 0.5419 | 0.2218   | 0.0135   | 0.0000   | 0.0038   | 0.0000   | 0.0168   | 0.0000   |
| AFP_P824_F      | 0.2970 | 0.2823 | 0.0106 | 0.6047 | 0.9867 | 0.6055   | 0.1249   | 0.0074   | 0.7848   | 0.0122   | 0.0229   | 0.1551   |
| AGTR1_P154_F    | 0.0000 | 0.0000 | 0.0000 | 0.0000 | 0.0000 | 0.0000   | 0.0039   | 0.0009   | 0.0000   | 0.0000   | 0.0000   | 0.0000   |
| AGTR1_P41_F     | 0.0208 | 0.0169 | 0.0258 | 0.0176 | 0.4324 | 0.0155   | 0.5808   | 0.0164   | 0.0184   | 0.0394   | 0.0197   | 0.0084   |
| AHR_E103_F      | 0.9700 | 0.9713 | 0.9580 | 0.9749 | 0.9892 | 0.9610   | 0.0000   | 0.0000   | 0.0000   | 0.0000   | 0.0000   | 0.0000   |
| AHR_P166_R      | 0.7842 | 0.6125 | 0.8008 | 0.7968 | 0.8249 | 0.7836   | 0.4679   | 0.6423   | 0.5894   | 0.7501   | 0.6195   | 0.2325   |

|                |        |        |        |        |        |        |        |        |        |        |        |        |
|----------------|--------|--------|--------|--------|--------|--------|--------|--------|--------|--------|--------|--------|
| AIM2_E208_F    | 0.0045 | 0.0000 | 0.0108 | 0.0147 | 0.0132 | 0.0090 | 0.0000 | 0.0094 | 0.0078 | 0.0159 | 0.0120 | 0.0024 |
| AKT1_P310_R    | 0.0126 | 0.0000 | 0.3952 | 0.2166 | 0.4632 | 0.1933 | 0.0100 | 0.0177 | 0.0009 | 0.0067 | 0.5081 | 0.9890 |
| ALK_P28_F      | 0.3095 | 0.0055 | 0.3830 | 0.4395 | 0.5159 | 0.2382 | 0.0135 | 0.0760 | 0.0033 | 0.0180 | 0.0094 | 0.0069 |
| ALOX12_E85_R   | 0.0000 | 0.0000 | 0.0000 | 0.0003 | 0.0018 | 0.0552 | 0.0032 | 0.0053 | 0.0000 | 0.0020 | 0.0058 | 0.0000 |
| ALOX12_P223_R  | 0.2047 | 0.8946 | 0.9823 | 0.9781 | 0.8614 | 0.9800 | 0.6500 | 0.0000 | 0.9805 | 0.9447 | 0.9852 | 0.0300 |
| APBA1_E99_R    | 0.0000 | 0.9763 | 0.0000 | 0.0000 | 0.0000 | 0.9089 | 0.0000 | 0.0000 | 0.0000 | 0.0000 | 0.0000 | 0.0000 |
| APBA1_P644_F   | 0.0000 | 0.0000 | 0.0000 | 0.0000 | 0.0000 | 0.0000 | 0.0000 | 0.0000 | 0.0000 | 0.0000 | 0.0000 | 0.0000 |
| APBA2_P227_F   | 0.8589 | 0.0000 | 0.4674 | 0.0045 | 0.0049 | 0.0685 | 0.0000 | 0.0042 | 0.0037 | 0.0022 | 0.0073 | 0.0000 |
| APC_P280_R     | 0.0000 | 0.0000 | 0.2498 | 0.9796 | 0.9804 | 0.9823 | 0.9949 | 0.9864 | 0.9827 | 0.0000 | 0.9821 | 0.0000 |
| APOA1_P75_F    | 0.0021 | 0.4029 | 0.0081 | 0.0000 | 0.0000 | 0.0000 | 0.1734 | 0.0000 | 0.0032 | 0.0000 | 0.0000 | 0.0000 |
| APOC1_P406_R   | 0.6583 | 0.0080 | 0.2989 | 0.1391 | 0.0394 | 0.3689 | 0.0085 | 0.0466 | 0.0137 | 0.0073 | 0.8035 | 0.6256 |
| APP_E8_F       | 0.0000 | 0.0011 | 0.0046 | 0.0044 | 0.0050 | 0.0015 | 0.0000 | 0.0032 | 0.0000 | 0.9093 | 0.0228 | 0.0031 |
| APP_P179_R     | 0.0310 | 0.9712 | 0.0243 | 0.0342 | 0.0170 | 0.0223 | 0.0202 | 0.0464 | 0.0160 | 0.0222 | 0.0723 | 0.1000 |
| AR_P189_R      | 0.1536 | 0.1469 | 0.0063 | 0.0128 | 0.1212 | 0.0116 | 0.1547 | 0.2274 | 0.2628 | 0.0089 | 0.0000 | 0.0619 |
| AREG_E25_F     | 0.0000 | 0.0000 | 0.0000 | 0.0000 | 0.0061 | 0.0000 | 0.0000 | 0.0063 | 0.0000 | 0.0052 | 0.0043 | 0.0000 |
| ARHGDI1_P148_R | 0.0251 | 0.0171 | 0.0189 | 0.0282 | 0.0275 | 0.0754 | 0.0175 | 0.0599 | 0.0287 | 0.0314 | 0.0284 | 0.0179 |
| ARNT_P238_R    | 0.0095 | 0.0061 | 0.0031 | 0.0071 | 0.0112 | 0.0039 | 0.1478 | 0.0057 | 0.0026 | 0.0095 | 0.0086 | 0.1339 |
| ASB4_P391_F    | 0.0077 | 0.0000 | 0.0042 | 0.4329 | 0.0020 | 0.0039 | 0.0000 | 0.0000 | 0.2859 | 0.0000 | 0.0000 | 0.0273 |
| ASB4_P52_R     | 0.0017 | 0.0056 | 0.0019 | 0.0830 | 0.0076 | 0.1591 | 0.0000 | 0.0067 | 0.0000 | 0.0067 | 0.0067 | 0.0048 |
| ASCL1_E24_F    | 0.0000 | 0.0000 | 0.0000 | 0.0000 | 0.0021 | 0.0000 | 0.0000 | 0.0000 | 0.0000 | 0.0000 | 0.0000 | 0.0000 |
| ASCL1_P747_F   | 0.0075 | 0.0067 | 0.0037 | 0.0048 | 0.1051 | 0.0042 | 0.0000 | 0.0000 | 0.0043 | 0.0043 | 0.0094 | 0.1086 |
| ASCL2_E76_R    | 0.0000 | 0.0000 | 0.0000 | 0.0000 | 0.0000 | 0.0000 | 0.0081 | 0.0000 | 0.0000 | 0.0036 | 0.0038 | 0.0012 |
| ASCL2_P360_F   | 0.0000 | 0.0000 | 0.0000 | 0.0000 | 0.0105 | 0.0000 | 0.0000 | 0.0000 | 0.0000 | 0.0000 | 0.0000 | 0.0000 |
| ASCL2_P609_R   | 0.0000 | 0.0021 | 0.0000 | 0.0000 | 0.0020 | 0.0000 | 0.0161 | 0.0069 | 0.0000 | 0.0087 | 0.0000 | 0.0069 |
| ATP10A_P147_F  | 0.0075 | 0.0000 | 0.0092 | 0.0072 | 0.2578 | 0.0039 | 0.0000 | 0.0000 | 0.0060 | 0.0033 | 0.0030 | 0.0000 |
| ATP10A_P524_R  | 0.0115 | 0.0057 | 0.0073 | 0.0094 | 0.0196 | 0.0077 | 0.0000 | 0.0187 | 0.0109 | 0.0163 | 0.0154 | 0.1059 |
| AXIN1_P995_R   | 0.0500 | 0.0092 | 0.0300 | 0.0205 | 0.4188 | 0.0118 | 0.0264 | 0.0177 | 0.0270 | 0.0157 | 0.0220 | 0.0108 |
| AXL_E61_F      | 0.0055 | 0.0081 | 0.0021 | 0.0472 | 0.0048 | 0.1166 | 0.0020 | 0.0046 | 0.0000 | 0.0020 | 0.0030 | 0.0001 |
| BAX_E281_R     | 0.0968 | 0.0088 | 0.0228 | 0.0154 | 0.5497 | 0.0158 | 0.4773 | 0.0140 | 0.0146 | 0.0248 | 0.5218 | 0.0224 |
| BCAM_E100_R    | 0.0087 | 0.0700 | 0.0108 | 0.1170 | 0.7114 | 0.0090 | 0.0095 | 0.0084 | 0.0053 | 0.1848 | 0.5406 | 0.0052 |
| BCAM_P205_F    | 0.0149 | 0.1865 | 0.0174 | 0.0172 | 0.0128 | 0.0140 | 0.0153 | 0.0091 | 0.4269 | 0.0140 | 0.0139 | 0.4217 |
| BCAP31_P1131_F | 0.0158 | 0.7488 | 0.0161 | 0.0128 | 0.0160 | 0.0101 | 0.0265 | 0.0161 | 0.0195 | 0.0190 | 0.0252 | 0.5821 |
| BCL2L2_E172_F  | 0.0000 | 0.0022 | 0.0000 | 0.0000 | 0.0059 | 0.0000 | 0.0000 | 0.0000 | 0.0000 | 0.0017 | 0.0060 | 0.0000 |

|                 |        |        |        |        |        |        |        |        |        |        |        |        |
|-----------------|--------|--------|--------|--------|--------|--------|--------|--------|--------|--------|--------|--------|
| BCL2L2_P280_F   | 0.0048 | 0.0000 | 0.0081 | 0.0077 | 0.0098 | 0.0037 | 0.8696 | 0.0000 | 0.0154 | 0.0000 | 0.0081 | 0.0000 |
| BCL3_E71_F      | 0.0004 | 0.0054 | 0.0002 | 0.0024 | 0.0049 | 0.0015 | 0.0075 | 0.0055 | 0.0000 | 0.0021 | 0.0037 | 0.0000 |
| BCL3_P1038_R    | 0.0075 | 0.0000 | 0.0074 | 0.1998 | 0.0101 | 0.0082 | 0.1022 | 0.0060 | 0.0048 | 0.0000 | 0.5549 | 0.0000 |
| BCL6_P248_R     | 0.0038 | 0.0000 | 0.0013 | 0.0040 | 0.0051 | 0.0045 | 0.0039 | 0.0000 | 0.0000 | 0.0069 | 0.0073 | 0.0000 |
| BDNF_E19_R      | 0.0021 | 0.0594 | 0.0122 | 0.0160 | 0.0672 | 0.0439 | 0.0078 | 0.0630 | 0.0211 | 0.0040 | 0.0055 | 0.0024 |
| BDNF_P259_R     | 0.9890 | 0.9854 | 0.9881 | 0.9842 | 0.4806 | 0.9790 | 0.9932 | 0.8121 | 0.9894 | 0.9203 | 0.9002 | 0.9918 |
| BGN_E282_R      | 0.0002 | 0.0008 | 0.0060 | 0.0044 | 0.0073 | 0.0019 | 0.0097 | 0.0095 | 0.0005 | 0.0054 | 0.0042 | 0.0047 |
| BGN_P333_R      | 0.0051 | 0.1329 | 0.0040 | 0.1231 | 0.0072 | 0.4523 | 0.0067 | 0.0042 | 0.0449 | 0.0077 | 0.0054 | 0.7562 |
| BIRC4_P122_R    | 0.6600 | 0.0057 | 0.0155 | 0.2247 | 0.4168 | 0.0949 | 0.1806 | 0.0140 | 0.0052 | 0.0155 | 0.0178 | 0.3491 |
| BIRC5_E89_F     | 0.0118 | 0.0277 | 0.0160 | 0.0182 | 0.0184 | 0.0219 | 0.0482 | 0.0215 | 0.0136 | 0.0188 | 0.0818 | 0.0991 |
| BLK_P14_F       | 0.0063 | 0.0709 | 0.0164 | 0.0078 | 0.0095 | 0.0075 | 0.1006 | 0.0142 | 0.0062 | 0.0150 | 0.4529 | 0.0083 |
| BMP2_E48_R      | 0.0101 | 0.0178 | 0.0592 | 0.0077 | 0.0113 | 0.1243 | 0.0195 | 0.0077 | 0.0133 | 0.0155 | 0.0114 | 0.2864 |
| BMP2_P1201_F    | 0.0007 | 0.0000 | 0.0000 | 0.0028 | 0.0000 | 0.0827 | 0.0000 | 0.0000 | 0.0000 | 0.0000 | 0.0004 | 0.0021 |
| BMP3_E147_F     | 0.0000 | 0.0000 | 0.0000 | 0.0000 | 0.0008 | 0.0000 | 0.0000 | 0.0021 | 0.0000 | 0.0018 | 0.0000 | 0.0000 |
| BMP3_P56_R      | 0.0000 | 0.0000 | 0.0053 | 0.0021 | 0.0045 | 0.0036 | 0.0000 | 0.0000 | 0.0000 | 0.0024 | 0.0000 | 0.0000 |
| BMP4_P199_R     | 0.0205 | 0.9583 | 0.0118 | 0.1905 | 0.0180 | 0.2647 | 0.0129 | 0.0195 | 0.0196 | 0.7958 | 0.0341 | 0.1017 |
| BMP6_P398_F     | 0.9685 | 0.8724 | 0.8980 | 0.9838 | 0.9844 | 0.9792 | 0.9930 | 0.9913 | 0.7875 | 0.8168 | 0.9888 | 0.9831 |
| BMPR1A_P956_F   | 0.0984 | 0.2280 | 0.0081 | 0.0159 | 0.2633 | 0.0114 | 0.0130 | 0.0133 | 0.0244 | 0.0131 | 0.0197 | 0.0081 |
| BMPR2_E435_F    | 0.0000 | 0.0000 | 0.0000 | 0.0000 | 0.0000 | 0.0000 | 0.0000 | 0.0000 | 0.0000 | 0.0000 | 0.0000 | 0.0000 |
| BMPR2_P1271_F   | 0.0019 | 0.0114 | 0.0185 | 0.2049 | 0.0049 | 0.0159 | 0.0000 | 0.0156 | 0.0979 | 0.0155 | 0.0115 | 0.1007 |
| BSG_P211_R      | 0.0553 | 0.4992 | 0.4001 | 0.0694 | 0.0688 | 0.0573 | 0.5198 | 0.1158 | 0.0712 | 0.7088 | 0.0919 | 0.1117 |
| BTK_P105_F      | 0.0127 | 0.0105 | 0.0129 | 0.0146 | 0.0179 | 0.0137 | 0.0094 | 0.0089 | 0.0106 | 0.0386 | 0.0181 | 0.1028 |
| C20orf47_P225_R | 0.1457 | 0.0000 | 0.0069 | 0.0097 | 0.0079 | 0.0033 | 0.0075 | 0.0094 | 0.0071 | 0.0000 | 0.0000 | 0.0000 |
| CALCA_E174_R    | 0.1359 | 0.1317 | 0.1076 | 0.0434 | 0.2830 | 0.0410 | 0.7007 | 0.0823 | 0.0564 | 0.6676 | 0.0746 | 0.5877 |
| CAPG_E228_F     | 0.0035 | 0.0000 | 0.0012 | 0.0677 | 0.0041 | 0.0018 | 0.0040 | 0.0000 | 0.0000 | 0.0031 | 0.0130 | 0.0008 |
| CASP10_E139_F   | 0.0030 | 0.0000 | 0.9710 | 0.0068 | 0.0000 | 0.0006 | 0.0885 | 0.0000 | 0.0022 | 0.0049 | 0.0099 | 0.0000 |
| CASP10_P186_F   | 0.9829 | 0.0000 | 0.7792 | 0.9788 | 0.9895 | 0.9552 | 0.0000 | 0.9621 | 0.9134 | 0.9865 | 0.9149 | 0.9888 |
| CASP2_P192_F    | 0.0223 | 0.3977 | 0.0715 | 0.0290 | 0.0477 | 0.0228 | 0.0659 | 0.5257 | 0.0380 | 0.0376 | 0.0344 | 0.3543 |
| CASP3_P420_R    | 0.0000 | 0.0056 | 0.0046 | 0.0019 | 0.0074 | 0.0014 | 0.0053 | 0.0050 | 0.0000 | 0.0096 | 0.0000 | 0.0000 |
| CASP6_P201_F    | 0.9809 | 0.9823 | 0.8206 | 0.6057 | 0.9840 | 0.9639 | 0.9922 | 0.1208 | 0.9769 | 0.7085 | 0.9751 | 0.0105 |
| CASP6_P230_R    | 0.0091 | 0.0245 | 0.9859 | 0.0089 | 0.0155 | 0.3023 | 0.0304 | 0.0674 | 0.0045 | 0.0087 | 0.0149 | 0.0178 |
| CAV1_P130_R     | 0.2138 | 0.0000 | 0.0000 | 0.0041 | 0.0081 | 0.0014 | 0.2319 | 0.0078 | 0.0000 | 0.0101 | 0.0117 | 0.1416 |
| CAV1_P169_F     | 0.6241 | 0.0236 | 0.0208 | 0.0168 | 0.0325 | 0.0173 | 0.1603 | 0.0284 | 0.0167 | 0.0270 | 0.0233 | 0.0205 |

|              |        |        |        |        |        |        |        |        |        |        |        |        |
|--------------|--------|--------|--------|--------|--------|--------|--------|--------|--------|--------|--------|--------|
| CAV2_E33_R   | 0.0145 | 0.0126 | 0.1649 | 0.2359 | 0.1144 | 0.1187 | 0.1390 | 0.0102 | 0.0137 | 0.0200 | 0.7283 | 0.0107 |
| CCKBR_P361_R | 0.0114 | 0.0076 | 0.0093 | 0.0113 | 0.0118 | 0.0104 | 0.0122 | 0.0097 | 0.0059 | 0.0117 | 0.0201 | 0.0100 |
| CCKBR_P480_F | 0.0011 | 0.0000 | 0.0011 | 0.0000 | 0.0039 | 0.0000 | 0.0000 | 0.0014 | 0.0000 | 0.0059 | 0.0059 | 0.0035 |
| CCNA1_E7_F   | 0.9791 | 0.0000 | 0.9792 | 0.9739 | 0.9855 | 0.9799 | 0.9923 | 0.0000 | 0.9816 | 0.9822 | 0.9782 | 0.9856 |
| CCNA1_P216_F | 0.0000 | 0.0000 | 0.0000 | 0.0000 | 0.0000 | 0.0002 | 0.0000 | 0.0000 | 0.0028 | 0.0006 | 0.0000 | 0.0003 |
| CCNC_P132_R  | 0.6758 | 0.0000 | 0.0000 | 0.0090 | 0.0000 | 0.3245 | 0.0000 | 0.0059 | 0.0000 | 0.0013 | 0.0000 | 0.0000 |
| CCND1_E280_R | 0.5400 | 0.0014 | 0.0000 | 0.4822 | 0.0000 | 0.2338 | 0.0000 | 0.0008 | 0.0000 | 0.5582 | 0.8404 | 0.0002 |
| CCND1_P343_R | 0.0000 | 0.0000 | 0.0000 | 0.0000 | 0.0000 | 0.0000 | 0.0000 | 0.0000 | 0.0000 | 0.0000 | 0.0000 | 0.0000 |
| CCND2_P887_F | 0.0000 | 0.0000 | 0.0000 | 0.0000 | 0.0008 | 0.0000 | 0.0000 | 0.0000 | 0.0000 | 0.0007 | 0.0000 | 0.0000 |
| CCND2_P898_R | 0.0836 | 0.1802 | 0.9688 | 0.8383 | 0.1116 | 0.6953 | 0.9907 | 0.9289 | 0.9854 | 0.0917 | 0.8685 | 0.5145 |
| CCNE1_P683_F | 0.0000 | 0.0000 | 0.0005 | 0.0000 | 0.0013 | 0.0435 | 0.0000 | 0.0000 | 0.0000 | 0.0000 | 0.0005 | 0.0000 |
| CD1A_P414_R  | 0.0051 | 0.0088 | 0.0061 | 0.0105 | 0.0099 | 0.0080 | 0.0487 | 0.0295 | 0.8004 | 0.0419 | 0.0129 | 0.0025 |
| CD2_P68_F    | 0.9886 | 0.0095 | 0.3075 | 0.6413 | 0.5140 | 0.6137 | 0.9917 | 0.0087 | 0.0614 | 0.2836 | 0.1777 | 0.6777 |
| CD34_P339_R  | 0.0083 | 0.3197 | 0.0141 | 0.0213 | 0.0151 | 0.0148 | 0.0145 | 0.0179 | 0.2958 | 0.0134 | 0.0156 | 0.0109 |
| CD34_P780_R  | 0.8555 | 0.5650 | 0.8872 | 0.8190 | 0.7135 | 0.7985 | 0.9862 | 0.8703 | 0.8263 | 0.8356 | 0.9017 | 0.9554 |
| CD40_E58_R   | 0.0014 | 0.0000 | 0.0001 | 0.0010 | 0.0000 | 0.0035 | 0.0000 | 0.0000 | 0.0022 | 0.0055 | 0.0049 | 0.0059 |
| CD40_P372_R  | 0.0255 | 0.2046 | 0.0156 | 0.1365 | 0.0420 | 0.0192 | 0.0143 | 0.0336 | 0.0179 | 0.0271 | 0.0293 | 0.0151 |
| CD44_E26_F   | 0.0000 | 0.0000 | 0.0000 | 0.0021 | 0.0051 | 0.0000 | 0.0000 | 0.1253 | 0.0000 | 0.0018 | 0.0016 | 0.0000 |
| CD44_P87_F   | 0.8616 | 0.0000 | 0.9362 | 0.2119 | 0.1607 | 0.8885 | 0.0000 | 0.0084 | 0.0000 | 0.0043 | 0.0250 | 0.0024 |
| CD86_P3_F    | 0.0000 | 0.0000 | 0.0000 | 0.0000 | 0.0000 | 0.0000 | 0.0000 | 0.0037 | 0.0000 | 0.0000 | 0.0000 | 0.0023 |
| CDC25B_E83_F | 0.0000 | 0.0000 | 0.0000 | 0.0000 | 0.0003 | 0.0000 | 0.0055 | 0.0000 | 0.0000 | 0.0000 | 0.0000 | 0.0014 |
| CDC25B_P11_R | 0.0063 | 0.0000 | 0.0000 | 0.0085 | 0.0196 | 0.0099 | 0.0000 | 0.0078 | 0.0000 | 0.0018 | 0.0124 | 0.0000 |
| CDH1_P52_R   | 0.0000 | 0.0000 | 0.0000 | 0.0009 | 0.0000 | 0.1044 | 0.0000 | 0.0000 | 0.0000 | 0.0008 | 0.0000 | 0.0031 |
| CDH11_E102_R | 0.0010 | 0.0000 | 0.0025 | 0.1510 | 0.0045 | 0.1046 | 0.0000 | 0.0333 | 0.0013 | 0.0048 | 0.0000 | 0.0149 |
| CDH11_P203_R | 0.8748 | 0.0268 | 0.0219 | 0.0159 | 0.0211 | 0.2027 | 0.0129 | 0.0165 | 0.0119 | 0.0182 | 0.0193 | 0.0131 |
| CDH11_P354_R | 0.0042 | 0.0057 | 0.2478 | 0.0383 | 0.0059 | 0.0023 | 0.0081 | 0.0063 | 0.0008 | 0.0000 | 0.0074 | 0.5198 |
| CDH13_E102_F | 0.9853 | 0.9903 | 0.9862 | 0.9846 | 0.0038 | 0.9839 | 0.0000 | 0.9912 | 0.9869 | 0.9866 | 0.9866 | 0.9920 |
| CDH17_E31_F  | 0.0239 | 0.0000 | 0.0039 | 0.3357 | 0.0324 | 0.0115 | 0.1867 | 0.0447 | 0.0478 | 0.0105 | 0.0140 | 0.0059 |
| CDH17_P532_F | 0.9873 | 0.9868 | 0.9847 | 0.9767 | 0.9682 | 0.9810 | 0.9955 | 0.1524 | 0.9877 | 0.9539 | 0.9864 | 0.9910 |
| CDH3_E100_R  | 0.0210 | 0.0276 | 0.0223 | 0.0255 | 0.0410 | 0.0244 | 0.0250 | 0.0280 | 0.0234 | 0.0266 | 0.0236 | 0.1947 |
| CDH3_P87_R   | 0.0017 | 0.0034 | 0.0011 | 0.0001 | 0.0060 | 0.3256 | 0.0000 | 0.0012 | 0.0000 | 0.0039 | 0.0112 | 0.0026 |
| CDK10_E74_F  | 0.9864 | 0.0844 | 0.9828 | 0.8958 | 0.4910 | 0.7699 | 0.7833 | 0.0249 | 0.0214 | 0.9880 | 0.0541 | 0.4622 |
| CDK2_P330_R  | 0.0000 | 0.0000 | 0.9632 | 0.7865 | 0.8148 | 0.9653 | 0.0000 | 0.9810 | 0.9733 | 0.0000 | 0.9343 | 0.0047 |



|                   |        |        |        |        |        |        |        |        |        |        |        |        |
|-------------------|--------|--------|--------|--------|--------|--------|--------|--------|--------|--------|--------|--------|
| CDK6_E256_F       | 0.0000 | 0.1107 | 0.0051 | 0.2224 | 0.3680 | 0.3224 | 0.0046 | 0.0000 | 0.0006 | 0.0096 | 0.0091 | 0.0000 |
| CDK6_P291_R       | 0.0219 | 0.0205 | 0.0161 | 0.0206 | 0.0157 | 0.0171 | 0.2240 | 0.0147 | 0.0164 | 0.0121 | 0.0280 | 0.2121 |
| CDKN1A_E101_F     | 0.0087 | 0.0017 | 0.0046 | 0.0072 | 0.0073 | 0.0081 | 0.1030 | 0.0000 | 0.0040 | 0.0000 | 0.7984 | 0.0039 |
| CDKN1A_P242_F     | 0.0027 | 0.0000 | 0.0093 | 0.0078 | 0.0085 | 0.1444 | 0.0000 | 0.0071 | 0.0024 | 0.0136 | 0.0095 | 0.0000 |
| CDKN1B_P1161_F    | 0.0000 | 0.0000 | 0.0000 | 0.0000 | 0.0000 | 0.0000 | 0.0158 | 0.0000 | 0.3123 | 0.0000 | 0.0000 | 0.0000 |
| CDKN2A_E121_R     | 0.0067 | 0.0048 | 0.0064 | 0.0933 | 0.0080 | 0.0095 | 0.0087 | 0.0043 | 0.0049 | 0.0064 | 0.0163 | 0.0033 |
| CDKN2B_E220_F     | 0.0000 | 0.0166 | 0.0000 | 0.0406 | 0.0056 | 0.4118 | 0.0000 | 0.0000 | 0.0000 | 0.0053 | 0.0091 | 0.0000 |
| CDM_seq_21_S260_R | 0.0056 | 0.0000 | 0.0041 | 0.0556 | 0.0203 | 0.0971 | 0.0000 | 0.0071 | 0.0010 | 0.0093 | 0.0072 | 0.0000 |
| CEACAM1_E57_R     | 0.0035 | 0.0000 | 0.0652 | 0.0053 | 0.0036 | 0.0042 | 0.0000 | 0.0042 | 0.1554 | 0.0036 | 0.0106 | 0.0000 |
| CEACAM1_P44_R     | 0.0069 | 0.2510 | 0.0080 | 0.0096 | 0.0155 | 0.0063 | 0.0000 | 0.0144 | 0.0034 | 0.2300 | 0.0104 | 0.0060 |
| CEBPA_P1163_R     | 0.0210 | 0.0353 | 0.0135 | 0.3105 | 0.0217 | 0.0688 | 0.0661 | 0.2027 | 0.0097 | 0.0164 | 0.0160 | 0.1849 |
| CEBPA_P706_F      | 0.0052 | 0.0000 | 0.3352 | 0.4207 | 0.0054 | 0.0047 | 0.0000 | 0.0076 | 0.0039 | 0.0000 | 0.0127 | 0.0025 |
| CFTR_P115_F       | 0.0019 | 0.0052 | 0.0047 | 0.0050 | 0.0067 | 0.1139 | 0.0000 | 0.0085 | 0.0013 | 0.0064 | 0.0099 | 0.1242 |
| CHD2_P451_F       | 0.0000 | 0.0000 | 0.0000 | 0.2268 | 0.0000 | 0.6881 | 0.0000 | 0.0000 | 0.0000 | 0.0000 | 0.1021 | 0.0000 |
| CHFR_P501_F       | 0.0021 | 0.0000 | 0.0035 | 0.0051 | 0.0144 | 0.0040 | 0.0103 | 0.0035 | 0.0006 | 0.0053 | 0.0010 | 0.0000 |
| CHFR_P635_R       | 0.9794 | 0.9085 | 0.9875 | 0.9638 | 0.0003 | 0.9832 | 0.9922 | 0.8306 | 0.9387 | 0.8010 | 0.9835 | 0.1270 |
| CHGA_E52_F        | 0.0000 | 0.0006 | 0.0038 | 0.0038 | 0.0085 | 0.0021 | 0.0000 | 0.0001 | 0.0000 | 0.0062 | 0.0035 | 0.0000 |
| CHI3L2_E10_F      | 0.0093 | 0.5724 | 0.0063 | 0.6345 | 0.7358 | 0.6176 | 0.5778 | 0.0076 | 0.0098 | 0.6045 | 0.0115 | 0.0038 |
| CLK1_P538_F       | 0.0003 | 0.0000 | 0.0000 | 0.0026 | 0.0031 | 0.0010 | 0.0000 | 0.0000 | 0.0000 | 0.0000 | 0.0000 | 0.0000 |
| COL18A1_P365_R    | 0.0105 | 0.0000 | 0.0083 | 0.0132 | 0.0156 | 0.0905 | 0.0119 | 0.0086 | 0.0357 | 0.0154 | 0.0154 | 0.2788 |
| COL1A1_P5_F       | 0.0000 | 0.0000 | 0.0000 | 0.0000 | 0.0027 | 0.0000 | 0.0000 | 0.0000 | 0.0000 | 0.0000 | 0.0000 | 0.0000 |
| COL1A2_E299_F     | 0.0045 | 0.4672 | 0.4166 | 0.4343 | 0.9245 | 0.3533 | 0.0000 | 0.0048 | 0.0048 | 0.0078 | 0.3986 | 0.0071 |
| COL1A2_P407_R     | 0.0014 | 0.0000 | 0.0000 | 0.0000 | 0.0000 | 0.0000 | 0.0000 | 0.0000 | 0.0000 | 0.0000 | 0.0002 | 0.0000 |
| COL1A2_P48_R      | 0.0270 | 0.0318 | 0.0293 | 0.0342 | 0.0200 | 0.0249 | 0.0748 | 0.0201 | 0.0321 | 0.0229 | 0.0336 | 0.2231 |
| COL4A3_E205_R     | 0.0000 | 0.0000 | 0.0000 | 0.0012 | 0.7867 | 0.0000 | 0.0076 | 0.0000 | 0.0000 | 0.0028 | 0.0043 | 0.0856 |
| COL4A3_P545_F     | 0.0332 | 0.8732 | 0.0418 | 0.0216 | 0.0699 | 0.0148 | 0.0938 | 0.0490 | 0.0372 | 0.8689 | 0.7798 | 0.7727 |
| COL6A1_P283_F     | 0.0350 | 0.0328 | 0.0172 | 0.0131 | 0.5811 | 0.2780 | 0.0005 | 0.0078 | 0.0078 | 0.0498 | 0.0119 | 0.0157 |
| COL6A1_P425_F     | 0.0137 | 0.0063 | 0.0204 | 0.0088 | 0.0160 | 0.0079 | 0.1094 | 0.0000 | 0.0099 | 0.0098 | 0.0252 | 0.0170 |
| COPG2_P298_F      | 0.6455 | 0.1431 | 0.2734 | 0.0406 | 0.1003 | 0.0408 | 0.1441 | 0.0748 | 0.1556 | 0.0725 | 0.0639 | 0.5456 |
| CPA4_P1265_R      | 0.0427 | 0.7852 | 0.0339 | 0.0615 | 0.0355 | 0.1637 | 0.7286 | 0.0335 | 0.0256 | 0.0766 | 0.0310 | 0.0249 |
| CREB1_P819_F      | 0.0052 | 0.9718 | 0.0045 | 0.0078 | 0.0093 | 0.0061 | 0.0172 | 0.0065 | 0.0000 | 0.0073 | 0.0052 | 0.0000 |
| CRIP1_P874_R      | 0.0184 | 0.0058 | 0.0072 | 0.0128 | 0.0185 | 0.0087 | 0.0173 | 0.0093 | 0.0061 | 0.0101 | 0.0120 | 0.3280 |
| CRK_P721_F        | 0.0051 | 0.0057 | 0.0042 | 0.0126 | 0.0602 | 0.0178 | 0.0067 | 0.0105 | 0.0595 | 0.0435 | 0.0403 | 0.0034 |

|               |        |        |        |        |        |        |        |        |        |        |        |        |
|---------------|--------|--------|--------|--------|--------|--------|--------|--------|--------|--------|--------|--------|
| CSF1_P217_F   | 0.0172 | 0.1959 | 0.8797 | 0.5760 | 0.9823 | 0.4311 | 0.1015 | 0.0161 | 0.0570 | 0.1756 | 0.0193 | 0.1927 |
| CSF1_P339_F   | 0.0000 | 0.0000 | 0.0000 | 0.0000 | 0.0000 | 0.0000 | 0.0026 | 0.0000 | 0.0000 | 0.0000 | 0.0000 | 0.0000 |
| CSF1R_E26_F   | 0.0055 | 0.0000 | 0.0000 | 0.0042 | 0.0076 | 0.0048 | 0.1733 | 0.0014 | 0.0044 | 0.0070 | 0.0000 | 0.0000 |
| CSF3R_P472_F  | 0.0349 | 0.1857 | 0.0324 | 0.0313 | 0.0343 | 0.0268 | 0.1341 | 0.0399 | 0.0343 | 0.0450 | 0.0236 | 0.1755 |
| CSPG2_E38_F   | 0.0005 | 0.0034 | 0.0040 | 0.0064 | 0.0060 | 0.0022 | 0.0000 | 0.0000 | 0.0000 | 0.0073 | 0.0061 | 0.0014 |
| CSPG2_P82_R   | 0.0022 | 0.0037 | 0.0044 | 0.0056 | 0.0062 | 0.0027 | 0.0000 | 0.0000 | 0.0015 | 0.0068 | 0.0057 | 0.0000 |
| CSTB_E410_F   | 0.9887 | 0.9213 | 0.0000 | 0.9287 | 0.5924 | 0.9320 | 0.0000 | 0.0080 | 0.0000 | 0.9757 | 0.9436 | 0.0067 |
| CTAG1B_P4_R   | 0.0000 | 0.0043 | 0.7317 | 0.0000 | 0.0026 | 0.4339 | 0.0051 | 0.0022 | 0.0000 | 0.0000 | 0.0000 | 0.0000 |
| CTAG1B_P77_F  | 0.8818 | 0.3213 | 0.9756 | 0.3648 | 0.1917 | 0.1391 | 0.0221 | 0.0181 | 0.0194 | 0.9916 | 0.0259 | 0.9903 |
| CTAG2_P1426_F | 0.5837 | 0.6867 | 0.0470 | 0.0119 | 0.0268 | 0.0108 | 0.7703 | 0.0262 | 0.0142 | 0.0321 | 0.0191 | 0.5403 |
| CTGF_E156_F   | 0.0004 | 0.0000 | 0.0027 | 0.0009 | 0.0041 | 0.0000 | 0.0048 | 0.0032 | 0.0000 | 0.0000 | 0.0031 | 0.0000 |
| CTLA4_P1128_F | 0.9892 | 0.7165 | 0.2150 | 0.2247 | 0.4382 | 0.3128 | 0.3161 | 0.8629 | 0.8093 | 0.6424 | 0.2623 | 0.2846 |
| CTNNA1_P185_R | 0.0000 | 0.0063 | 0.0025 | 0.0003 | 0.0032 | 0.0018 | 0.0000 | 0.0000 | 0.0000 | 0.0018 | 0.0034 | 0.0000 |
| CTNNA1_P382_R | 0.0008 | 0.0947 | 0.0040 | 0.0034 | 0.0142 | 0.0021 | 0.1074 | 0.0039 | 0.0038 | 0.0058 | 0.0054 | 0.0035 |
| CTNNB1_P757_F | 0.0080 | 0.0074 | 0.0060 | 0.0087 | 0.0409 | 0.0070 | 0.0759 | 0.0070 | 0.0033 | 0.0119 | 0.0090 | 0.5781 |
| CTSD_P726_F   | 0.0000 | 0.0000 | 0.0000 | 0.0000 | 0.0000 | 0.0000 | 0.0000 | 0.0000 | 0.0000 | 0.0000 | 0.0000 | 0.0000 |
| CTSH_P238_F   | 0.0000 | 0.0000 | 0.0000 | 0.0000 | 0.0000 | 0.0000 | 0.0000 | 0.0000 | 0.0000 | 0.0000 | 0.0000 | 0.0000 |
| CTSL_P264_R   | 0.0051 | 0.0000 | 0.0063 | 0.0051 | 0.0122 | 0.1447 | 0.0000 | 0.0041 | 0.0012 | 0.0096 | 0.0070 | 0.0013 |
| CTSL_P81_F    | 0.0036 | 0.0000 | 0.0028 | 0.2618 | 0.0009 | 0.0010 | 0.0074 | 0.0146 | 0.0037 | 0.0091 | 0.0128 | 0.0007 |
| CTTN_E29_R    | 0.0054 | 0.0000 | 0.0040 | 0.0050 | 0.0000 | 0.0015 | 0.0092 | 0.0058 | 0.0000 | 0.0000 | 0.0090 | 0.0036 |
| CYP1A1_P382_F | 0.0142 | 0.6161 | 0.0215 | 0.0288 | 0.0468 | 0.0369 | 0.4654 | 0.0301 | 0.0542 | 0.0665 | 0.0265 | 0.5779 |
| CYP2E1_P416_F | 0.0200 | 0.0100 | 0.0067 | 0.0131 | 0.0064 | 0.0076 | 0.0032 | 0.1147 | 0.0473 | 0.0082 | 0.0082 | 0.0792 |
| DAB2_P35_F    | 0.0000 | 0.0000 | 0.0000 | 0.0563 | 0.0000 | 0.0000 | 0.0000 | 0.0000 | 0.0000 | 0.8098 | 0.0000 | 0.0000 |
| DAB2_P468_F   | 0.0612 | 0.2655 | 0.0240 | 0.0301 | 0.0232 | 0.0264 | 0.0180 | 0.0100 | 0.0263 | 0.0184 | 0.0222 | 0.2393 |
| DAB2IP_P9_F   | 0.0000 | 0.0000 | 0.0000 | 0.0000 | 0.0000 | 0.2701 | 0.0000 | 0.0000 | 0.0000 | 0.0000 | 0.0000 | 0.0000 |
| DAPK1_P10_F   | 0.0010 | 0.0000 | 0.0000 | 0.0016 | 0.0175 | 0.4446 | 0.0000 | 0.0049 | 0.0000 | 0.0058 | 0.0106 | 0.0000 |
| DAPK1_P345_R  | 0.0000 | 0.0003 | 0.0000 | 0.0000 | 0.0000 | 0.0000 | 0.0000 | 0.0000 | 0.0000 | 0.0000 | 0.0042 | 0.0022 |
| DBC1_P351_R   | 0.0000 | 0.0000 | 0.0000 | 0.0000 | 0.0104 | 0.0001 | 0.0000 | 0.0000 | 0.0000 | 0.0023 | 0.0000 | 0.0000 |
| DCC_P177_F    | 0.0059 | 0.1373 | 0.0076 | 0.2403 | 0.0065 | 0.0785 | 0.0070 | 0.0112 | 0.0064 | 0.0110 | 0.4634 | 0.0049 |
| DCC_P471_R    | 0.0085 | 0.2407 | 0.0116 | 0.0155 | 0.2341 | 0.0256 | 0.0086 | 0.0295 | 0.0158 | 0.0159 | 0.0312 | 0.0133 |
| DCN_P1320_R   | 0.0000 | 0.0000 | 0.0000 | 0.0000 | 0.0000 | 0.0000 | 0.0000 | 0.0000 | 0.0000 | 0.9374 | 0.0068 | 0.9859 |
| DDB2_P407_F   | 0.0000 | 0.0000 | 0.0000 | 0.4981 | 0.0018 | 0.0000 | 0.0000 | 0.0000 | 0.0000 | 0.0000 | 0.3508 | 0.0000 |
| DDB2_P613_R   | 0.0069 | 0.0053 | 0.0034 | 0.0056 | 0.0755 | 0.0039 | 0.0378 | 0.0057 | 0.0051 | 0.0066 | 0.0082 | 0.0246 |

|                     |        |        |        |        |        |        |        |        |        |        |        |        |
|---------------------|--------|--------|--------|--------|--------|--------|--------|--------|--------|--------|--------|--------|
| DDR1_E23_R          | 0.0000 | 0.0094 | 0.0000 | 0.0058 | 0.0058 | 0.1561 | 0.0000 | 0.0058 | 0.0029 | 0.0095 | 0.0090 | 0.0037 |
| DDR2_E331_F         | 0.0000 | 0.9897 | 0.9864 | 0.9791 | 0.0000 | 0.9739 | 0.0000 | 0.9828 | 0.9865 | 0.0000 | 0.9864 | 0.0552 |
| DES_E228_R          | 0.0000 | 0.0000 | 0.0044 | 0.0093 | 0.0000 | 0.0040 | 0.0000 | 0.0089 | 0.0003 | 0.0000 | 0.0000 | 0.0000 |
| DHCR24_P406_R       | 0.2701 | 0.0158 | 0.2217 | 0.2216 | 0.4215 | 0.1208 | 0.0160 | 0.0107 | 0.0167 | 0.0127 | 0.0150 | 0.0096 |
| DIO3_E230_R         | 0.0033 | 0.0000 | 0.0034 | 0.0056 | 0.0075 | 0.0037 | 0.0000 | 0.0057 | 0.0020 | 0.0050 | 0.0117 | 0.0000 |
| DIO3_P674_F         | 0.8231 | 0.1682 | 0.0081 | 0.6804 | 0.0117 | 0.5733 | 0.0120 | 0.0147 | 0.0095 | 0.0103 | 0.0215 | 0.0085 |
| DIRAS3_E55_R        | 0.0000 | 0.0000 | 0.0329 | 0.0222 | 0.0134 | 0.0235 | 0.0000 | 0.1108 | 0.8700 | 0.0000 | 0.0141 | 0.0000 |
| DKC1_E101_F         | 0.0000 | 0.0000 | 0.0000 | 0.0000 | 0.0000 | 0.0000 | 0.0000 | 0.0000 | 0.0000 | 0.0000 | 0.0000 | 0.0000 |
| DKFZP564O0823_E45_F | 0.0014 | 0.0015 | 0.0000 | 0.0037 | 0.0660 | 0.0017 | 0.0000 | 0.0034 | 0.0000 | 0.0052 | 0.0000 | 0.0034 |
| DLC1_P88_R          | 0.0000 | 0.0000 | 0.0000 | 0.7241 | 0.0019 | 0.6244 | 0.0000 | 0.0051 | 0.0000 | 0.0000 | 0.0000 | 0.0000 |
| DLK1_E227_R         | 0.9948 | 0.9965 | 0.9798 | 0.9921 | 0.9875 | 0.9916 | 0.9975 | 0.9788 | 0.9951 | 0.9706 | 0.9949 | 0.9973 |
| DLL1_P386_F         | 0.9820 | 0.0000 | 0.8229 | 0.8584 | 0.8542 | 0.9669 | 0.9907 | 0.9683 | 0.9187 | 0.9815 | 0.0000 | 0.0000 |
| DLL1_P832_F         | 0.9861 | 0.0091 | 0.0050 | 0.1616 | 0.0098 | 0.0745 | 0.0000 | 0.0060 | 0.0045 | 0.0022 | 0.0115 | 0.0036 |
| DMP1_P134_F         | 0.0767 | 0.0145 | 0.0233 | 0.0191 | 0.0246 | 0.0722 | 0.0175 | 0.0117 | 0.0149 | 0.0150 | 0.7014 | 0.0079 |
| DNAJC15_E26_R       | 0.0042 | 0.0674 | 0.0062 | 0.0079 | 0.0073 | 0.0064 | 0.1413 | 0.0055 | 0.0019 | 0.0063 | 0.0157 | 0.0033 |
| DNASE1L1_P108_F     | 0.7510 | 0.1202 | 0.5574 | 0.9372 | 0.9428 | 0.9857 | 0.0338 | 0.0296 | 0.9490 | 0.5664 | 0.0301 | 0.0198 |
| DNMT1_P100_R        | 0.9852 | 0.4950 | 0.9531 | 0.9835 | 0.9824 | 0.9829 | 0.4471 | 0.9857 | 0.9890 | 0.7531 | 0.9885 | 0.4549 |
| DSC2_E90_F          | 0.9575 | 0.9631 | 0.9219 | 0.9494 | 0.0000 | 0.9657 | 0.0000 | 0.0000 | 0.9529 | 0.0000 | 0.0000 | 0.0000 |
| DSP_P440_R          | 0.0283 | 0.7541 | 0.9249 | 0.9234 | 0.0235 | 0.9789 | 0.4091 | 0.8905 | 0.6371 | 0.9873 | 0.9171 | 0.9881 |
| DST_E31_F           | 0.8949 | 0.0296 | 0.9826 | 0.6062 | 0.0620 | 0.7421 | 0.0091 | 0.0269 | 0.4846 | 0.0207 | 0.0161 | 0.7993 |
| DST_P262_R          | 0.0745 | 0.0455 | 0.0620 | 0.0736 | 0.0862 | 0.0609 | 0.5266 | 0.0359 | 0.1220 | 0.0861 | 0.0602 | 0.5546 |
| DUSP4_E61_F         | 0.0000 | 0.0000 | 0.0071 | 0.0083 | 0.0060 | 0.0047 | 0.0000 | 0.0000 | 0.0049 | 0.0000 | 0.0116 | 0.0804 |
| DUSP4_P925_R        | 0.0329 | 0.0206 | 0.0373 | 0.2367 | 0.0241 | 0.1178 | 0.3971 | 0.0133 | 0.3983 | 0.6158 | 0.0270 | 0.4690 |
| E2F3_P840_R         | 0.0166 | 0.9824 | 0.8734 | 0.6441 | 0.0000 | 0.1857 | 0.8182 | 0.0061 | 0.0000 | 0.0153 | 0.6761 | 0.0000 |
| E2F5_P516_R         | 0.9696 | 0.9520 | 0.9365 | 0.9373 | 0.9615 | 0.9551 | 0.1323 | 0.9239 | 0.9665 | 0.9634 | 0.2905 | 0.9716 |
| EDN1_E50_R          | 0.4686 | 0.9861 | 0.5227 | 0.3612 | 0.4237 | 0.2636 | 0.9785 | 0.9827 | 0.5762 | 0.6827 | 0.7176 | 0.4737 |
| EDN1_P39_R          | 0.0126 | 0.6352 | 0.2426 | 0.2276 | 0.0910 | 0.0121 | 0.7417 | 0.3035 | 0.0006 | 0.6234 | 0.0979 | 0.9899 |
| EDNRB_P148_R        | 0.0000 | 0.0000 | 0.9822 | 0.9170 | 0.0000 | 0.9762 | 0.0010 | 0.0000 | 0.9889 | 0.2283 | 0.8071 | 0.0000 |
| EFNA1_P591_R        | 0.0117 | 0.0000 | 0.0038 | 0.0038 | 0.0000 | 0.3878 | 0.2092 | 0.0000 | 0.0000 | 0.0000 | 0.0076 | 0.8012 |
| EFNA1_P7_F          | 0.0000 | 0.0000 | 0.0000 | 0.5287 | 0.7944 | 0.8367 | 0.0000 | 0.0000 | 0.0000 | 0.0000 | 0.0028 | 0.0000 |
| EFNB1_E69_F         | 0.0055 | 0.0000 | 0.0032 | 0.3060 | 0.0085 | 0.5464 | 0.0109 | 0.1857 | 0.0006 | 0.0000 | 0.0110 | 0.0062 |
| EFNB3_P442_R        | 0.0050 | 0.0040 | 0.0011 | 0.0018 | 0.0038 | 0.1557 | 0.0080 | 0.0048 | 0.0000 | 0.0054 | 0.0083 | 0.8750 |
| EGF_E339_F          | 0.0080 | 0.0000 | 0.6565 | 0.2509 | 0.0001 | 0.1959 | 0.0000 | 0.0000 | 0.0000 | 0.0010 | 0.0000 | 0.5746 |

|                |        |        |        |        |        |        |        |        |        |        |        |        |
|----------------|--------|--------|--------|--------|--------|--------|--------|--------|--------|--------|--------|--------|
| EGFR_E295_R    | 0.0037 | 0.1406 | 0.0034 | 0.0679 | 0.0053 | 0.0074 | 0.0819 | 0.0062 | 0.0017 | 0.0073 | 0.0061 | 0.0027 |
| EGFR_P260_R    | 0.9835 | 0.0000 | 0.9835 | 0.3181 | 0.5308 | 0.9735 | 0.0000 | 0.0000 | 0.9839 | 0.0044 | 0.0063 | 0.0020 |
| EGR4_P479_F    | 0.9855 | 0.7907 | 0.9827 | 0.8926 | 0.9094 | 0.8730 | 0.9909 | 0.5143 | 0.9651 | 0.5658 | 0.0271 | 0.3569 |
| EIF2AK2_E103_R | 0.0000 | 0.0000 | 0.9775 | 0.9744 | 0.0000 | 0.9802 | 0.0000 | 0.0000 | 0.7896 | 0.6690 | 0.0000 | 0.0000 |
| EIF2AK2_P313_F | 0.9755 | 0.9940 | 0.8024 | 0.9866 | 0.9108 | 0.9870 | 0.4736 | 0.6326 | 0.9900 | 0.2631 | 0.9895 | 0.1462 |
| ELK1_E156_F    | 0.0000 | 0.0000 | 0.9860 | 0.9367 | 0.0018 | 0.9694 | 0.0000 | 0.9857 | 0.9788 | 0.0000 | 0.9814 | 0.9900 |
| EMR3_P39_R     | 0.0111 | 0.0112 | 0.9798 | 0.7044 | 0.7671 | 0.5818 | 0.4742 | 0.9080 | 0.9774 | 0.0093 | 0.0340 | 0.9918 |
| ENC1_P484_R    | 0.9859 | 0.0085 | 0.9884 | 0.9841 | 0.9927 | 0.9852 | 0.2083 | 0.9878 | 0.0027 | 0.9830 | 0.9133 | 0.0051 |
| EPHA1_E46_R    | 0.0225 | 0.1439 | 0.0160 | 0.4951 | 0.0299 | 0.3086 | 0.2518 | 0.2468 | 0.0222 | 0.7931 | 0.6671 | 0.5977 |
| EPHA1_P119_R   | 0.5335 | 0.0000 | 0.0009 | 0.0844 | 0.0093 | 0.1120 | 0.0110 | 0.7345 | 0.0000 | 0.0056 | 0.0091 | 0.0000 |
| EPHA2_P203_F   | 0.7789 | 0.0047 | 0.0037 | 0.1144 | 0.0061 | 0.2394 | 0.0000 | 0.0103 | 0.0000 | 0.0055 | 0.0094 | 0.0019 |
| EPHA3_E156_R   | 0.0000 | 0.0000 | 0.0000 | 0.0016 | 0.0000 | 0.1340 | 0.0000 | 0.0000 | 0.0000 | 0.0020 | 0.0664 | 0.0000 |
| EPHA7_E6_F     | 0.0159 | 0.0000 | 0.5510 | 0.4816 | 0.0059 | 0.5658 | 0.6899 | 0.5023 | 0.5169 | 0.0057 | 0.4261 | 0.0029 |
| EPHA7_P205_R   | 0.9612 | 0.9783 | 0.9704 | 0.9847 | 0.9881 | 0.9855 | 0.0795 | 0.2417 | 0.9026 | 0.9921 | 0.9781 | 0.9916 |
| EPHA8_P256_F   | 0.0212 | 0.0255 | 0.0109 | 0.1162 | 0.0233 | 0.0185 | 0.1446 | 0.0288 | 0.0188 | 0.0521 | 0.0278 | 0.1922 |
| EPHB1_P503_F   | 0.6034 | 0.1109 | 0.0064 | 0.3163 | 0.6065 | 0.3142 | 0.0129 | 0.2201 | 0.0041 | 0.5382 | 0.2841 | 0.0053 |
| EPHB2_E297_F   | 0.0610 | 0.1263 | 0.0628 | 0.0171 | 0.0263 | 0.2984 | 0.8299 | 0.6938 | 0.1073 | 0.6911 | 0.5634 | 0.0677 |
| EPHB2_P165_R   | 0.0054 | 0.0608 | 0.0075 | 0.5044 | 0.0000 | 0.4263 | 0.0152 | 0.0000 | 0.0000 | 0.0102 | 0.0110 | 0.0073 |
| EPHB3_E0_F     | 0.9221 | 0.0000 | 0.7252 | 0.2601 | 0.0000 | 0.5177 | 0.0000 | 0.0002 | 0.0000 | 0.0010 | 0.0012 | 0.0000 |
| EPHB3_P569_R   | 0.0142 | 0.3269 | 0.0088 | 0.0219 | 0.1915 | 0.0227 | 0.1873 | 0.1009 | 0.3502 | 0.0257 | 0.0264 | 0.2961 |
| EPHB4_P313_R   | 0.0397 | 0.0204 | 0.0864 | 0.2083 | 0.0391 | 0.2965 | 0.1175 | 0.6422 | 0.0350 | 0.9822 | 0.0216 | 0.6679 |
| EPHB6_E342_F   | 0.0864 | 0.6494 | 0.0677 | 0.1221 | 0.0286 | 0.1508 | 0.0000 | 0.9583 | 0.0764 | 0.5450 | 0.5740 | 0.0493 |
| EPHB6_P827_R   | 0.0017 | 0.0000 | 0.0007 | 0.3246 | 0.0044 | 0.2897 | 0.0084 | 0.0000 | 0.0000 | 0.0054 | 0.0029 | 0.0002 |
| EPHX1_P1358_R  | 0.0000 | 0.6263 | 0.9836 | 0.9604 | 0.0000 | 0.9757 | 0.0000 | 0.0000 | 0.8875 | 0.8884 | 0.9309 | 0.0000 |
| EPM2A_P113_F   | 0.0921 | 0.1722 | 0.1452 | 0.5435 | 0.7327 | 0.2747 | 0.8524 | 0.7835 | 0.0986 | 0.2743 | 0.0704 | 0.0735 |
| EPM2A_P64_R    | 0.5569 | 0.7461 | 0.0194 | 0.0192 | 0.0224 | 0.0149 | 0.5166 | 0.6289 | 0.6582 | 0.0188 | 0.0204 | 0.4254 |
| EPO_E244_R     | 0.0000 | 0.0000 | 0.0000 | 0.0000 | 0.0014 | 0.1433 | 0.0038 | 0.0021 | 0.0000 | 0.0003 | 0.0023 | 0.0002 |
| EPO_P162_R     | 0.6103 | 0.0000 | 0.0000 | 0.5255 | 0.0000 | 0.6081 | 0.0000 | 0.0000 | 0.4066 | 0.0000 | 0.5650 | 0.0000 |
| EPS8_E231_F    | 0.9800 | 0.9834 | 0.9695 | 0.5407 | 0.9774 | 0.9638 | 0.0318 | 0.0000 | 0.1810 | 0.0634 | 0.0665 | 0.0920 |
| EPS8_P437_F    | 0.0000 | 0.0000 | 0.0000 | 0.3359 | 0.0053 | 0.5200 | 0.7628 | 0.0000 | 0.0000 | 0.0000 | 0.7552 | 0.0000 |
| ERBB2_P59_R    | 0.6283 | 0.1567 | 0.4789 | 0.7146 | 0.9886 | 0.9599 | 0.9965 | 0.8694 | 0.0000 | 0.9135 | 0.9822 | 0.0024 |
| ERBB3_E331_F   | 0.0168 | 0.9896 | 0.0131 | 0.5237 | 0.0217 | 0.6064 | 0.0257 | 0.0168 | 0.5787 | 0.0256 | 0.6671 | 0.0174 |
| ERBB3_P870_R   | 0.0542 | 0.4561 | 0.1759 | 0.2628 | 0.0129 | 0.0145 | 0.2158 | 0.5795 | 0.0075 | 0.1452 | 0.0194 | 0.3246 |

|               |        |        |        |        |        |        |        |        |        |        |        |        |
|---------------|--------|--------|--------|--------|--------|--------|--------|--------|--------|--------|--------|--------|
| ERBB4_P255_F  | 0.0124 | 0.4692 | 0.0269 | 0.0176 | 0.0176 | 0.1214 | 0.2158 | 0.4134 | 0.0098 | 0.0145 | 0.0192 | 0.0079 |
| ERBB4_P541_F  | 0.2737 | 0.2094 | 0.9756 | 0.8899 | 0.0303 | 0.6562 | 0.0000 | 0.0000 | 0.1196 | 0.8147 | 0.0213 | 0.9906 |
| ERCC1_P354_F  | 0.8548 | 0.4958 | 0.4422 | 0.7641 | 0.8198 | 0.7480 | 0.0000 | 0.7670 | 0.5644 | 0.8275 | 0.4802 | 0.9927 |
| ERCC3_P1210_R | 0.9886 | 0.3794 | 0.5808 | 0.6255 | 0.5941 | 0.9566 | 0.3075 | 0.0244 | 0.0391 | 0.0197 | 0.8458 | 0.2564 |
| ERG_E28_F     | 0.5359 | 0.0226 | 0.0166 | 0.4935 | 0.3536 | 0.5852 | 0.7254 | 0.0261 | 0.9085 | 0.0227 | 0.3743 | 0.0105 |
| ERN1_P809_R   | 0.9331 | 0.0075 | 0.9877 | 0.9677 | 0.9869 | 0.9760 | 0.9945 | 0.9816 | 0.0000 | 0.0000 | 0.9892 | 0.1771 |
| ESR1_E298_R   | 0.0211 | 0.7776 | 0.6912 | 0.9147 | 0.9865 | 0.9121 | 0.8297 | 0.9879 | 0.5866 | 0.7048 | 0.1019 | 0.7099 |
| ESR1_P151_R   | 0.5178 | 0.0000 | 0.8751 | 0.7994 | 0.6342 | 0.9651 | 0.1328 | 0.0071 | 0.0030 | 0.0266 | 0.0241 | 0.0062 |
| ESR2_E66_F    | 0.4405 | 0.0890 | 0.8303 | 0.1152 | 0.0781 | 0.5330 | 0.1930 | 0.9570 | 0.7937 | 0.4063 | 0.0342 | 0.3589 |
| ESR2_P162_F   | 0.0356 | 0.0305 | 0.0294 | 0.1763 | 0.0160 | 0.4291 | 0.0296 | 0.0374 | 0.0559 | 0.0333 | 0.0341 | 0.0170 |
| ETS1_E253_R   | 0.0264 | 0.0244 | 0.0313 | 0.0332 | 0.1890 | 0.3936 | 0.1570 | 0.0398 | 0.1501 | 0.1432 | 0.8406 | 0.0334 |
| ETS1_P559_R   | 0.9881 | 0.0000 | 0.0000 | 0.9800 | 0.9873 | 0.9806 | 0.0000 | 0.0000 | 0.9860 | 0.0000 | 0.9844 | 0.9834 |
| ETS2_P684_F   | 0.0148 | 0.9924 | 0.5229 | 0.6634 | 0.6933 | 0.7906 | 0.9942 | 0.9886 | 0.7400 | 0.3948 | 0.0201 | 0.3700 |
| ETS2_P835_F   | 0.2092 | 0.0000 | 0.0044 | 0.0140 | 0.0097 | 0.0058 | 0.0000 | 0.0170 | 0.0000 | 0.1714 | 0.0117 | 0.4913 |
| ETV1_P235_F   | 0.9797 | 0.8719 | 0.9848 | 0.9668 | 0.0197 | 0.9801 | 0.3814 | 0.3027 | 0.0000 | 0.8745 | 0.9872 | 0.6504 |
| ETV1_P515_F   | 0.0072 | 0.0000 | 0.0056 | 0.9706 | 0.0056 | 0.0021 | 0.0000 | 0.0003 | 0.1117 | 0.0000 | 0.0000 | 0.0092 |
| ETV6_E430_F   | 0.1388 | 0.6174 | 0.5879 | 0.2934 | 0.4937 | 0.3884 | 0.0136 | 0.0030 | 0.4218 | 0.0078 | 0.0116 | 0.0041 |
| EVI1_E47_R    | 0.3897 | 0.3271 | 0.2736 | 0.9722 | 0.6583 | 0.9734 | 0.2561 | 0.2891 | 0.4814 | 0.2958 | 0.9697 | 0.0194 |
| EVI1_P30_R    | 0.0000 | 0.0000 | 0.0041 | 0.0038 | 0.0050 | 0.0536 | 0.0076 | 0.6098 | 0.0000 | 0.0000 | 0.0123 | 0.0028 |
| EVI2A_P94_R   | 0.7505 | 0.0000 | 0.0000 | 0.3700 | 0.0057 | 0.2201 | 0.0000 | 0.0000 | 0.0000 | 0.0000 | 0.0082 | 0.0000 |
| EXT1_E197_F   | 0.0261 | 0.0188 | 0.0072 | 0.0167 | 0.0221 | 0.2070 | 0.3220 | 0.5376 | 0.0144 | 0.5745 | 0.4435 | 0.2636 |
| EYA4_E277_F   | 0.0056 | 0.0745 | 0.0100 | 0.0108 | 0.0095 | 0.0083 | 0.0000 | 0.9885 | 0.0026 | 0.0123 | 0.0618 | 0.0041 |
| EYA4_P508_F   | 0.9877 | 0.3233 | 0.0000 | 0.6369 | 0.4534 | 0.6685 | 0.9915 | 0.0053 | 0.9112 | 0.0000 | 0.0013 | 0.0000 |
| EYA4_P794_F   | 0.0000 | 0.0000 | 0.7176 | 0.8638 | 0.0011 | 0.9777 | 0.0738 | 0.0000 | 0.9892 | 0.0000 | 0.9805 | 0.0000 |
| F2R_P839_F    | 0.7832 | 0.0045 | 0.0000 | 0.9805 | 0.2967 | 0.9819 | 0.0000 | 0.0000 | 0.3546 | 0.9888 | 0.9855 | 0.8546 |
| F2R_P88_F     | 0.4758 | 0.3454 | 0.5970 | 0.6020 | 0.0051 | 0.8974 | 0.7210 | 0.0080 | 0.8057 | 0.0000 | 0.7881 | 0.0004 |
| FABP3_E113_F  | 0.4657 | 0.0064 | 0.0098 | 0.3944 | 0.3352 | 0.6492 | 0.9927 | 0.0146 | 0.4306 | 0.9852 | 0.5188 | 0.0062 |
| FABP3_P598_F  | 0.1348 | 0.3780 | 0.3095 | 0.1880 | 0.5641 | 0.5217 | 0.9961 | 0.8480 | 0.3978 | 0.9689 | 0.7777 | 0.6182 |
| FANCE_P356_R  | 0.0000 | 0.0000 | 0.0022 | 0.8389 | 0.0000 | 0.8456 | 0.0000 | 0.4430 | 0.0000 | 0.9875 | 0.0135 | 0.0000 |
| FANCF_P13_F   | 0.0728 | 0.7590 | 0.2466 | 0.5717 | 0.5790 | 0.6084 | 0.6241 | 0.5241 | 0.9654 | 0.6185 | 0.5824 | 0.6797 |
| FANCG_E207_R  | 0.6629 | 0.0931 | 0.0954 | 0.0352 | 0.0552 | 0.2076 | 0.9677 | 0.1299 | 0.0528 | 0.1452 | 0.1303 | 0.0527 |
| FAS_P322_R    | 0.9677 | 0.1562 | 0.7099 | 0.7986 | 0.9812 | 0.6581 | 0.9880 | 0.9851 | 0.8671 | 0.4103 | 0.0108 | 0.3794 |
| FASTK_P257_F  | 0.0856 | 0.0873 | 0.0915 | 0.7999 | 0.7363 | 0.6913 | 0.0762 | 0.0841 | 0.0767 | 0.0877 | 0.0942 | 0.0211 |

|               |        |        |        |        |        |        |        |        |        |        |        |        |
|---------------|--------|--------|--------|--------|--------|--------|--------|--------|--------|--------|--------|--------|
| FAT_P973_R    | 0.0215 | 0.0093 | 0.0175 | 0.2231 | 0.0329 | 0.4482 | 0.0123 | 0.0261 | 0.0016 | 0.0447 | 0.0116 | 0.0126 |
| FER_P581_F    | 0.6601 | 0.0387 | 0.5947 | 0.8828 | 0.5559 | 0.9184 | 0.2328 | 0.9876 | 0.9790 | 0.9887 | 0.5894 | 0.3246 |
| FES_P223_R    | 0.0000 | 0.0000 | 0.0000 | 0.9539 | 0.0000 | 0.9697 | 0.0000 | 0.9599 | 0.0000 | 0.9806 | 0.9757 | 0.0000 |
| FGF1_E5_F     | 0.3706 | 0.7763 | 0.9684 | 0.9358 | 0.8548 | 0.9699 | 0.3192 | 0.9907 | 0.0750 | 0.4972 | 0.4491 | 0.9162 |
| FGF12_E61_R   | 0.0075 | 0.5492 | 0.0110 | 0.0944 | 0.0215 | 0.1349 | 0.1947 | 0.3951 | 0.5857 | 0.0159 | 0.6508 | 0.0142 |
| FGF12_P210_R  | 0.9798 | 0.9904 | 0.9824 | 0.9816 | 0.9896 | 0.9843 | 0.0000 | 0.7822 | 0.9911 | 0.9884 | 0.9781 | 0.9901 |
| FGF2_P153_F   | 0.0301 | 0.3326 | 0.0270 | 0.2735 | 0.0181 | 0.2323 | 0.0171 | 0.0240 | 0.0328 | 0.7523 | 0.3474 | 0.0146 |
| FGF2_P229_F   | 0.1287 | 0.4618 | 0.0472 | 0.5696 | 0.7783 | 0.6237 | 0.4513 | 0.0213 | 0.0301 | 0.1165 | 0.5087 | 0.6346 |
| FGF3_E198_R   | 0.3698 | 0.4100 | 0.6962 | 0.7299 | 0.9779 | 0.6056 | 0.9919 | 0.5126 | 0.9772 | 0.7820 | 0.6654 | 0.6339 |
| FGF3_P171_R   | 0.7812 | 0.9299 | 0.9712 | 0.8238 | 0.6728 | 0.9138 | 0.0043 | 0.0007 | 0.4233 | 0.5126 | 0.8708 | 0.0032 |
| FGF5_E16_F    | 0.9834 | 0.0082 | 0.9889 | 0.9795 | 0.9826 | 0.9713 | 0.0000 | 0.9916 | 0.0043 | 0.9848 | 0.0076 | 0.9904 |
| FGF5_P238_R   | 0.2373 | 0.0000 | 0.4357 | 0.3998 | 0.2930 | 0.4421 | 0.0056 | 0.6970 | 0.0000 | 0.4739 | 0.6167 | 0.0000 |
| FGF6_E294_F   | 0.0647 | 0.1661 | 0.0464 | 0.6115 | 0.8570 | 0.8642 | 0.8011 | 0.5620 | 0.0551 | 0.0566 | 0.6504 | 0.0380 |
| FGF7_P44_F    | 0.0028 | 0.0000 | 0.0000 | 0.6255 | 0.5999 | 0.5547 | 0.0000 | 0.0000 | 0.0000 | 0.0000 | 0.0057 | 0.0000 |
| FGF8_E183_F   | 0.0251 | 0.0000 | 0.1924 | 0.2177 | 0.0165 | 0.0271 | 0.0000 | 0.0000 | 0.0359 | 0.0291 | 0.1803 | 0.0000 |
| FGF8_P473_F   | 0.0000 | 0.0000 | 0.4557 | 0.4708 | 0.9753 | 0.1555 | 0.0000 | 0.0000 | 0.7536 | 0.0000 | 0.9737 | 0.0000 |
| FGFR1_E317_F  | 0.5899 | 0.0000 | 0.0162 | 0.2566 | 0.0842 | 0.0114 | 0.9923 | 0.0097 | 0.0085 | 0.0000 | 0.0089 | 0.0120 |
| FGFR2_P266_R  | 0.0092 | 0.0192 | 0.2727 | 0.0102 | 0.0132 | 0.0085 | 0.1298 | 0.2785 | 0.0055 | 0.0095 | 0.0116 | 0.0057 |
| FGFR3_E297_R  | 0.0000 | 0.0142 | 0.0137 | 0.9789 | 0.8269 | 0.9677 | 0.0553 | 0.0000 | 0.9782 | 0.8875 | 0.0002 | 0.0000 |
| FGFR3_P1152_R | 0.9512 | 0.8451 | 0.8186 | 0.9006 | 0.8458 | 0.8048 | 0.0000 | 0.8332 | 0.9926 | 0.9566 | 0.9484 | 0.0312 |
| FHIT_E19_R    | 0.9892 | 0.0000 | 0.9494 | 0.9307 | 0.9841 | 0.9759 | 0.0000 | 0.9893 | 0.9790 | 0.9256 | 0.9820 | 0.0000 |
| FHIT_P93_R    | 0.0078 | 0.0055 | 0.0044 | 0.0934 | 0.6170 | 0.1995 | 0.0089 | 0.0037 | 0.0015 | 0.0048 | 0.0285 | 0.0029 |
| FHL1_E229_R   | 0.0088 | 0.0000 | 0.9823 | 0.1326 | 0.0000 | 0.2327 | 0.0000 | 0.0000 | 0.0000 | 0.5301 | 0.0034 | 0.0000 |
| FLI1_P620_R   | 0.0813 | 0.1535 | 0.7926 | 0.8241 | 0.9758 | 0.8442 | 0.0944 | 0.0000 | 0.9670 | 0.0148 | 0.0059 | 0.0000 |
| FLT1_E444_F   | 0.1831 | 0.0451 | 0.4088 | 0.5557 | 0.4114 | 0.7391 | 0.9938 | 0.9458 | 0.3817 | 0.0330 | 0.8585 | 0.1015 |
| FLT1_P302_F   | 0.0260 | 0.0265 | 0.1202 | 0.0233 | 0.0368 | 0.1332 | 0.0195 | 0.7622 | 0.0218 | 0.0273 | 0.0211 | 0.0170 |
| FLT1_P615_R   | 0.0073 | 0.0054 | 0.6322 | 0.4210 | 0.0105 | 0.0043 | 0.1446 | 0.0106 | 0.0056 | 0.0095 | 0.2446 | 0.1071 |
| FLT3_E326_R   | 0.0061 | 0.0081 | 0.1990 | 0.1202 | 0.0179 | 0.1726 | 0.0128 | 0.0121 | 0.0031 | 0.0505 | 0.0112 | 0.1232 |
| FLT4_P180_R   | 0.9864 | 0.9715 | 0.9887 | 0.9263 | 0.9678 | 0.9802 | 0.0188 | 0.8573 | 0.9793 | 0.9832 | 0.8686 | 0.9445 |
| FMR1_P62_R    | 0.3164 | 0.9128 | 0.3604 | 0.2665 | 0.4338 | 0.2319 | 0.9404 | 0.4414 | 0.3087 | 0.4183 | 0.3060 | 0.9013 |
| FN1_E469_F    | 0.0000 | 0.0033 | 0.6066 | 0.1566 | 0.0047 | 0.2922 | 0.0087 | 0.0070 | 0.0000 | 0.0057 | 0.0066 | 0.0023 |
| FN1_P229_R    | 0.0121 | 0.0203 | 0.7168 | 0.1919 | 0.0209 | 0.0473 | 0.0209 | 0.6265 | 0.4887 | 0.0139 | 0.5772 | 0.0385 |
| FOSL2_E384_R  | 0.9865 | 0.4207 | 0.9887 | 0.8994 | 0.8482 | 0.9637 | 0.0675 | 0.0048 | 0.7979 | 0.9924 | 0.8925 | 0.9940 |

|                |        |        |        |        |        |        |        |        |        |        |        |        |
|----------------|--------|--------|--------|--------|--------|--------|--------|--------|--------|--------|--------|--------|
| FRK_P36_F      | 0.0135 | 0.9880 | 0.0098 | 0.2236 | 0.0127 | 0.1229 | 0.0111 | 0.4647 | 0.0064 | 0.0000 | 0.1086 | 0.9119 |
| FRZB_E186_R    | 0.9731 | 0.0000 | 0.0000 | 0.9291 | 0.5810 | 0.7210 | 0.5933 | 0.0000 | 0.0000 | 0.9697 | 0.0000 | 0.0000 |
| FRZB_P406_F    | 0.0000 | 0.0000 | 0.5686 | 0.0019 | 0.2626 | 0.1119 | 0.0088 | 0.0000 | 0.0000 | 0.0059 | 0.0053 | 0.0000 |
| FVT1_P225_F    | 0.0048 | 0.0000 | 0.0037 | 0.0544 | 0.4196 | 0.0068 | 0.0000 | 0.0000 | 0.0044 | 0.0057 | 0.0133 | 0.9902 |
| FYN_P352_R     | 0.9872 | 0.9935 | 0.9912 | 0.9793 | 0.9921 | 0.5691 | 0.9976 | 0.9922 | 0.4527 | 0.9575 | 0.9024 | 0.9923 |
| FZD7_E296_F    | 0.9780 | 0.9898 | 0.9850 | 0.9764 | 0.0000 | 0.9713 | 0.0000 | 0.0000 | 0.9868 | 0.0089 | 0.9643 | 0.0000 |
| FZD9_E458_F    | 0.0000 | 0.0000 | 0.8800 | 0.9678 | 0.9803 | 0.9728 | 0.0000 | 0.0000 | 0.9402 | 0.0000 | 0.0000 | 0.1982 |
| FZD9_P15_R     | 0.0004 | 0.0066 | 0.0000 | 0.2802 | 0.0065 | 0.0000 | 0.0000 | 0.0025 | 0.0000 | 0.0000 | 0.0013 | 0.0000 |
| FZD9_P175_F    | 0.4815 | 0.9902 | 0.3675 | 0.3912 | 0.1369 | 0.5266 | 0.1428 | 0.5329 | 0.0103 | 0.9842 | 0.2586 | 0.7920 |
| G6PD_E190_F    | 0.0000 | 0.0000 | 0.0000 | 0.5927 | 0.0000 | 0.5792 | 0.0000 | 0.0000 | 0.0000 | 0.9871 | 0.0000 | 0.0000 |
| G6PD_P196_F    | 0.6129 | 0.0478 | 0.0120 | 0.4996 | 0.4207 | 0.3008 | 0.0158 | 0.0146 | 0.0069 | 0.8061 | 0.0191 | 0.4698 |
| GABRB3_E42_F   | 0.0000 | 0.0000 | 0.0028 | 0.0828 | 0.0083 | 0.0044 | 0.0015 | 0.0000 | 0.0000 | 0.0048 | 0.0019 | 0.1131 |
| GADD45A_P737_R | 0.0207 | 0.5588 | 0.4098 | 0.0220 | 0.0487 | 0.0277 | 0.0237 | 0.6943 | 0.0197 | 0.0293 | 0.0273 | 0.0225 |
| GALR1_E52_F    | 0.0162 | 0.2032 | 0.0064 | 0.0191 | 0.0093 | 0.0121 | 0.0650 | 0.0092 | 0.0084 | 0.0055 | 0.0217 | 0.3090 |
| GALR1_P80_F    | 0.0076 | 0.0066 | 0.0111 | 0.0484 | 0.0082 | 0.0066 | 0.0000 | 0.0082 | 0.0022 | 0.0089 | 0.0097 | 0.9882 |
| GAS1_E22_F     | 0.0079 | 0.0379 | 0.0071 | 0.0086 | 0.0157 | 0.0614 | 0.0117 | 0.0065 | 0.3205 | 0.0103 | 0.0162 | 0.0001 |
| GAS1_P754_R    | 0.0000 | 0.0000 | 0.0000 | 0.0028 | 0.0000 | 0.0000 | 0.0044 | 0.0022 | 0.0000 | 0.0048 | 0.0061 | 0.0022 |
| GAS7_E148_F    | 0.0149 | 0.0093 | 0.0114 | 0.2289 | 0.0103 | 0.0115 | 0.0140 | 0.2048 | 0.0131 | 0.0181 | 0.0198 | 0.4138 |
| GAS7_P622_R    | 0.0000 | 0.0000 | 0.0000 | 0.0000 | 0.0000 | 0.0000 | 0.0000 | 0.0000 | 0.0000 | 0.0000 | 0.0000 | 0.0000 |
| GATA6_P21_R    | 0.0040 | 0.0053 | 0.0046 | 0.0783 | 0.0084 | 0.0055 | 0.0000 | 0.0052 | 0.0022 | 0.0045 | 0.0080 | 0.0000 |
| GATA6_P726_F   | 0.0189 | 0.5473 | 0.0107 | 0.0118 | 0.0137 | 0.0079 | 0.0723 | 0.0095 | 0.0155 | 0.3733 | 0.0105 | 0.0113 |
| GFI1_E136_F    | 0.0726 | 0.0006 | 0.0057 | 0.0076 | 0.1150 | 0.0020 | 0.0067 | 0.0059 | 0.0002 | 0.1587 | 0.0081 | 0.1953 |
| GFI1_P45_R     | 0.0042 | 0.0000 | 0.0006 | 0.0051 | 0.0071 | 0.0489 | 0.0072 | 0.0043 | 0.0024 | 0.0061 | 0.0109 | 0.0058 |
| GJB2_E43_F     | 0.0063 | 0.0037 | 0.0048 | 0.0136 | 0.0057 | 0.0159 | 0.0000 | 0.0099 | 0.0109 | 0.0093 | 0.0146 | 0.0058 |
| GJB2_P791_R    | 0.0146 | 0.1925 | 0.0101 | 0.0115 | 0.0137 | 0.1006 | 0.0138 | 0.0091 | 0.0112 | 0.0104 | 0.0106 | 0.1504 |
| GJB2_P931_R    | 0.2717 | 0.3068 | 0.0645 | 0.0298 | 0.0407 | 0.0283 | 0.1685 | 0.1900 | 0.2238 | 0.0443 | 0.0568 | 0.0246 |
| GLA_P112_F     | 0.0224 | 0.0074 | 0.0113 | 0.3706 | 0.9384 | 0.8185 | 0.2538 | 0.0188 | 0.0000 | 0.0251 | 0.0447 | 0.0499 |
| GLI2_E90_F     | 0.9857 | 0.9882 | 0.9850 | 0.9820 | 0.9834 | 0.9815 | 0.9239 | 0.9894 | 0.9888 | 0.9786 | 0.9858 | 0.0000 |
| GLI3_E148_R    | 0.9484 | 0.7261 | 0.9770 | 0.9038 | 0.6459 | 0.9824 | 0.0962 | 0.9468 | 0.9820 | 0.6950 | 0.9914 | 0.9769 |
| GML_P281_R     | 0.9837 | 0.9907 | 0.9874 | 0.9537 | 0.0000 | 0.9443 | 0.9960 | 0.0000 | 0.0000 | 0.0000 | 0.0013 | 0.0000 |
| GNAS_E58_F     | 0.1057 | 0.0000 | 0.9868 | 0.8129 | 0.8574 | 0.9465 | 0.0000 | 0.8017 | 0.8975 | 0.0000 | 0.7127 | 0.9912 |
| GP1BB_E23_F    | 0.0073 | 0.0094 | 0.0060 | 0.0083 | 0.9889 | 0.0650 | 0.0079 | 0.0070 | 0.0054 | 0.0055 | 0.0125 | 0.1397 |
| GPC3_P235_R    | 0.0008 | 0.0000 | 0.0025 | 0.4484 | 0.0025 | 0.6221 | 0.0079 | 0.0016 | 0.0000 | 0.6964 | 0.0061 | 0.0000 |

|                     |        |        |        |        |        |        |        |        |        |        |        |        |
|---------------------|--------|--------|--------|--------|--------|--------|--------|--------|--------|--------|--------|--------|
| GPR116_E328_R       | 0.9874 | 0.9077 | 0.9851 | 0.9824 | 0.9853 | 0.9833 | 0.9937 | 0.9817 | 0.9900 | 0.9927 | 0.9907 | 0.0000 |
| GPX1_E46_R          | 0.0086 | 0.0060 | 0.0129 | 0.0088 | 0.0095 | 0.0056 | 0.0000 | 0.0096 | 0.0056 | 0.0086 | 0.0126 | 0.0000 |
| GPX1_P194_F         | 0.0242 | 0.8028 | 0.0270 | 0.0216 | 0.5742 | 0.0152 | 0.6610 | 0.0267 | 0.0413 | 0.0270 | 0.0291 | 0.4175 |
| GPX3_E178_F         | 0.0106 | 0.0162 | 0.2877 | 0.1310 | 0.0115 | 0.1074 | 0.0094 | 0.0093 | 0.0085 | 0.0083 | 0.0159 | 0.0068 |
| GRB10_E85_R         | 0.0174 | 0.0020 | 0.4575 | 0.0084 | 0.0156 | 0.0048 | 0.0225 | 0.0113 | 0.0026 | 0.0062 | 0.0101 | 0.0000 |
| GRB10_P260_F        | 0.0158 | 0.0039 | 0.0116 | 0.0048 | 0.0076 | 0.0060 | 0.0126 | 0.0104 | 0.0037 | 0.0086 | 0.0208 | 0.0000 |
| GRB10_P496_R        | 0.0069 | 0.0056 | 0.0132 | 0.3020 | 0.0414 | 0.0028 | 0.2787 | 0.0106 | 0.0128 | 0.0000 | 0.0107 | 0.2333 |
| GRPR_P200_R         | 0.9811 | 0.9410 | 0.1789 | 0.9198 | 0.7824 | 0.8826 | 0.2085 | 0.1873 | 0.1767 | 0.8060 | 0.9812 | 0.1805 |
| GSTM1_P363_F        | 0.9851 | 0.0000 | 0.0110 | 0.8289 | 0.0134 | 0.0089 | 0.1083 | 0.0087 | 0.0055 | 0.9841 | 0.0116 | 0.1669 |
| GSTM2_E153_F        | 0.0011 | 0.0036 | 0.0000 | 0.0029 | 0.0065 | 0.0017 | 0.0000 | 0.0052 | 0.0000 | 0.0038 | 0.0055 | 0.0011 |
| GSTM2_P109_R        | 0.0030 | 0.0044 | 0.0052 | 0.0020 | 0.0064 | 0.0013 | 0.0085 | 0.5065 | 0.0001 | 0.0044 | 0.0065 | 0.0000 |
| GSTM2_P453_R        | 0.9612 | 0.0000 | 0.0008 | 0.5335 | 0.9824 | 0.7529 | 0.0000 | 0.9832 | 0.9826 | 0.0000 | 0.9777 | 0.0000 |
| GSTP1_E322_R        | 0.0002 | 0.0000 | 0.0126 | 0.0062 | 0.0084 | 0.0077 | 0.0000 | 0.0349 | 0.0033 | 0.0101 | 0.0080 | 0.0021 |
| GSTP1_P74_F         | 0.5104 | 0.0878 | 0.0204 | 0.0197 | 0.0334 | 0.1056 | 0.4572 | 0.0253 | 0.0196 | 0.0198 | 0.0293 | 0.1166 |
| GSTP1_seq_38_S153_R | 0.2127 | 0.0098 | 0.0056 | 0.0086 | 0.0000 | 0.0068 | 0.0000 | 0.0000 | 0.0000 | 0.0132 | 0.0076 | 0.0000 |
| GUCY2D_E419_R       | 0.0057 | 0.0012 | 0.0000 | 0.0061 | 0.0071 | 0.0034 | 0.0000 | 0.0039 | 0.0036 | 0.0029 | 0.0066 | 0.0000 |
| HBEGF_P32_R         | 0.0007 | 0.0000 | 0.0000 | 0.0018 | 0.0000 | 0.0015 | 0.0000 | 0.0000 | 0.0000 | 0.0000 | 0.0031 | 0.0000 |
| HBII-13_E48_F       | 0.0000 | 0.0000 | 0.0000 | 0.9582 | 0.9796 | 0.9670 | 0.0000 | 0.9896 | 0.9720 | 0.9809 | 0.0000 | 0.0000 |
| HBII-52_P563_F      | 0.0461 | 0.0367 | 0.8476 | 0.8280 | 0.6827 | 0.6687 | 0.0512 | 0.6958 | 0.7248 | 0.0353 | 0.4069 | 0.5413 |
| HCK_P46_R           | 0.0090 | 0.0096 | 0.0123 | 0.0100 | 0.2154 | 0.1641 | 0.0000 | 0.0109 | 0.0148 | 0.0139 | 0.0000 | 0.2443 |
| HCK_P858_F          | 0.0250 | 0.6909 | 0.0644 | 0.0130 | 0.0297 | 0.0118 | 0.0694 | 0.0339 | 0.0295 | 0.6289 | 0.0331 | 0.4479 |
| HDAC1_P414_R        | 0.7793 | 0.0000 | 0.0045 | 0.0029 | 0.0000 | 0.3836 | 0.0120 | 0.0106 | 0.0017 | 0.0070 | 0.5713 | 0.0056 |
| HDAC11_P556_F       | 0.0030 | 0.0000 | 0.0000 | 0.0000 | 0.0000 | 0.0005 | 0.0000 | 0.0000 | 0.0000 | 0.0000 | 0.0038 | 0.0000 |
| HDAC9_P137_R        | 0.4487 | 0.0030 | 0.0010 | 0.1035 | 0.0026 | 0.0010 | 0.0000 | 0.0020 | 0.0017 | 0.0026 | 0.0036 | 0.0031 |
| HFE_E273_R          | 0.0033 | 0.0019 | 0.0025 | 0.0000 | 0.0015 | 0.0000 | 0.0000 | 0.0024 | 0.0009 | 0.0011 | 0.0054 | 0.0062 |
| HHIP_P307_R         | 0.0209 | 0.1679 | 0.0220 | 0.2154 | 0.0321 | 0.1233 | 0.1009 | 0.0380 | 0.0243 | 0.0378 | 0.0325 | 0.6276 |
| HIC1_E151_F         | 0.0000 | 0.0000 | 0.0000 | 0.2606 | 0.0000 | 0.0000 | 0.0000 | 0.0000 | 0.9726 | 0.0000 | 0.0000 | 0.0000 |
| HIC1_P565_R         | 0.0033 | 0.0000 | 0.0124 | 0.0161 | 0.0049 | 0.0107 | 0.0000 | 0.0000 | 0.0000 | 0.0000 | 0.0000 | 0.0000 |
| HIC2_P498_F         | 0.0042 | 0.0000 | 0.0000 | 0.0057 | 0.0095 | 0.0038 | 0.0091 | 0.0000 | 0.0000 | 0.0000 | 0.0110 | 0.0000 |
| HIC2_P528_R         | 0.0031 | 0.0000 | 0.0000 | 0.0037 | 0.0113 | 0.0035 | 0.0237 | 0.0062 | 0.0036 | 0.0112 | 0.0140 | 0.0075 |
| HIF1A_P488_F        | 0.0077 | 0.0000 | 0.0000 | 0.0000 | 0.0036 | 0.0000 | 0.0000 | 0.0025 | 0.0000 | 0.0000 | 0.0087 | 0.0105 |
| HLA-DOB_P357_R      | 0.9830 | 0.9722 | 0.9862 | 0.9688 | 0.9704 | 0.9739 | 0.0000 | 0.0000 | 0.0000 | 0.9706 | 0.9845 | 0.9893 |
| HLA-DPA1_P205_R     | 0.0175 | 0.0195 | 0.0203 | 0.3179 | 0.0098 | 0.0221 | 0.1260 | 0.1592 | 0.0069 | 0.0174 | 0.0164 | 0.1387 |



|                 |        |        |        |        |        |        |        |        |        |        |        |        |
|-----------------|--------|--------|--------|--------|--------|--------|--------|--------|--------|--------|--------|--------|
| HLA-DPA1_P28_R  | 0.0013 | 0.0053 | 0.0022 | 0.0069 | 0.0075 | 0.2285 | 0.0031 | 0.0055 | 0.0045 | 0.0072 | 0.0062 | 0.0000 |
| HLA-DPB1_E2_R   | 0.0404 | 0.0146 | 0.0405 | 0.0323 | 0.2689 | 0.0720 | 0.5559 | 0.0000 | 0.0315 | 0.0230 | 0.0338 | 0.6237 |
| HLA-DRA_P132_R  | 0.0000 | 0.0000 | 0.0000 | 0.0000 | 0.0000 | 0.0000 | 0.0000 | 0.0000 | 0.0000 | 0.0000 | 0.0000 | 0.0000 |
| HLA-F_E402_F    | 0.0000 | 0.0000 | 0.0000 | 0.0000 | 0.0031 | 0.0000 | 0.0009 | 0.0106 | 0.0000 | 0.0007 | 0.0000 | 0.0000 |
| HLF_E192_F      | 0.0316 | 0.5947 | 0.0289 | 0.0158 | 0.0339 | 0.0656 | 0.0252 | 0.0300 | 0.0253 | 0.7703 | 0.0189 | 0.0234 |
| HOXA11_E35_F    | 0.0000 | 0.0047 | 0.0034 | 0.0056 | 0.0052 | 0.0020 | 0.0000 | 0.0000 | 0.0023 | 0.0033 | 0.0066 | 0.0342 |
| HOXA11_P698_F   | 0.0173 | 0.6380 | 0.5885 | 0.0223 | 0.1776 | 0.0209 | 0.6728 | 0.0284 | 0.0444 | 0.6169 | 0.0867 | 0.0117 |
| HOXA5_E187_F    | 0.9872 | 0.9850 | 0.9385 | 0.9409 | 0.9915 | 0.9763 | 0.0000 | 0.9883 | 0.9886 | 0.0000 | 0.9908 | 0.0000 |
| HOXA9_E252_R    | 0.0090 | 0.0000 | 0.0062 | 0.0241 | 0.0100 | 0.1004 | 0.0184 | 0.0418 | 0.0070 | 0.0060 | 0.0114 | 0.1089 |
| HOXA9_P1141_R   | 0.0641 | 0.0259 | 0.0166 | 0.0161 | 0.0162 | 0.0189 | 0.1995 | 0.0196 | 0.0201 | 0.0213 | 0.0140 | 0.1610 |
| HOXA9_P303_F    | 0.0000 | 0.0015 | 0.0000 | 0.0000 | 0.0012 | 0.0000 | 0.0000 | 0.0010 | 0.0000 | 0.2876 | 0.0021 | 0.0000 |
| HOXB13_E21_F    | 0.0032 | 0.0070 | 0.0030 | 0.0036 | 0.0045 | 0.1464 | 0.0067 | 0.0033 | 0.0016 | 0.0031 | 0.4119 | 0.0020 |
| HOXB13_P17_R    | 0.0023 | 0.0000 | 0.3232 | 0.5824 | 0.0046 | 0.2646 | 0.0000 | 0.0033 | 0.0000 | 0.0037 | 0.0047 | 0.0026 |
| HOXC6_P456_R    | 0.0348 | 0.1200 | 0.0300 | 0.0340 | 0.3663 | 0.0766 | 0.6830 | 0.0294 | 0.0479 | 0.7230 | 0.0351 | 0.6154 |
| HPN_P374_R      | 0.0000 | 0.0077 | 0.0000 | 0.0049 | 0.0000 | 0.1848 | 0.0000 | 0.0051 | 0.0105 | 0.0000 | 0.0171 | 0.9899 |
| HPN_P823_F      | 0.7858 | 0.0000 | 0.0000 | 0.6951 | 0.0000 | 0.8435 | 0.9938 | 0.0005 | 0.0000 | 0.9847 | 0.0081 | 0.0000 |
| HPSE_P29_F      | 0.5876 | 0.0333 | 0.0321 | 0.0252 | 0.0266 | 0.0192 | 0.9933 | 0.0364 | 0.0230 | 0.0204 | 0.0290 | 0.4965 |
| HPSE_P93_F      | 0.0017 | 0.0039 | 0.0000 | 0.2959 | 0.0078 | 0.1406 | 0.0000 | 0.0013 | 0.0009 | 0.0046 | 0.0061 | 0.0027 |
| HRASLS_E72_R    | 0.0000 | 0.0000 | 0.0000 | 0.2109 | 0.0000 | 0.0220 | 0.0000 | 0.0000 | 0.0000 | 0.0000 | 0.0000 | 0.0000 |
| HS3ST2_E145_R   | 0.0000 | 0.9733 | 0.0000 | 0.1987 | 0.0000 | 0.0000 | 0.0000 | 0.4132 | 0.0000 | 0.0036 | 0.0073 | 0.0000 |
| HS3ST2_P546_F   | 0.0000 | 0.0017 | 0.3539 | 0.2099 | 0.1014 | 0.0952 | 0.0101 | 0.0000 | 0.0000 | 0.0000 | 0.0000 | 0.0000 |
| HSD17B12_E145_R | 0.0256 | 0.0140 | 0.0116 | 0.0176 | 0.0131 | 0.0173 | 0.0109 | 0.5458 | 0.0567 | 0.0166 | 0.0170 | 0.0000 |
| HTR1B_P222_F    | 0.0063 | 0.0000 | 0.0000 | 0.0018 | 0.0006 | 0.0000 | 0.0081 | 0.0000 | 0.0000 | 0.0028 | 0.0000 | 0.0024 |
| HTR2A_P853_F    | 0.0015 | 0.0015 | 0.0000 | 0.1835 | 0.0000 | 0.0000 | 0.0089 | 0.0023 | 0.0000 | 0.0065 | 0.0069 | 0.0031 |
| IAPP_E280_F     | 0.9742 | 0.0000 | 0.9766 | 0.9799 | 0.0000 | 0.9757 | 0.0000 | 0.9847 | 0.9846 | 0.9832 | 0.0000 | 0.9904 |
| ICA1_P61_F      | 0.0000 | 0.0000 | 0.0000 | 0.0000 | 0.0000 | 0.0000 | 0.0000 | 0.0000 | 0.0000 | 0.0000 | 0.0000 | 0.0003 |
| ICA1_P72_R      | 0.0009 | 0.0000 | 0.0023 | 0.0001 | 0.0000 | 0.0000 | 0.0069 | 0.0015 | 0.0000 | 0.0027 | 0.0000 | 0.0000 |
| ICAM1_E242_F    | 0.0082 | 0.4900 | 0.3699 | 0.0099 | 0.0205 | 0.0113 | 0.0586 | 0.0121 | 0.0078 | 0.0089 | 0.0643 | 0.2875 |
| ICAM1_P119_R    | 0.0082 | 0.0000 | 0.0025 | 0.0008 | 0.0134 | 0.0903 | 0.0075 | 0.0062 | 0.0000 | 0.0067 | 0.0036 | 0.0000 |
| ICAM1_P386_R    | 0.0004 | 0.0000 | 0.0023 | 0.0017 | 0.0045 | 0.0000 | 0.0050 | 0.0000 | 0.0000 | 0.0041 | 0.0000 | 0.7256 |
| ID1_P659_R      | 0.0000 | 0.0000 | 0.0022 | 0.0027 | 0.0039 | 0.0023 | 0.0057 | 0.0000 | 0.0000 | 0.0018 | 0.0058 | 0.0000 |
| IFNG_P459_R     | 0.9854 | 0.8526 | 0.0203 | 0.9734 | 0.2880 | 0.9610 | 0.1840 | 0.6255 | 0.9858 | 0.9882 | 0.9750 | 0.8967 |
| IFNGR1_P307_F   | 0.0039 | 0.1359 | 0.0105 | 0.0091 | 0.0121 | 0.0088 | 0.0167 | 0.0134 | 0.0026 | 0.0077 | 0.0110 | 0.0070 |

|                |        |        |        |        |        |        |        |        |        |        |        |        |
|----------------|--------|--------|--------|--------|--------|--------|--------|--------|--------|--------|--------|--------|
| IFNGR2_E164_F  | 0.0311 | 0.0462 | 0.0321 | 0.0209 | 0.0348 | 0.0296 | 0.0212 | 0.0330 | 0.1145 | 0.1171 | 0.0352 | 0.1569 |
| IFNGR2_P377_R  | 0.4330 | 0.0015 | 0.0000 | 0.0003 | 0.0029 | 0.3136 | 0.0000 | 0.0001 | 0.0008 | 0.0000 | 0.0005 | 0.0000 |
| IGF1_E394_F    | 0.9873 | 0.0000 | 0.7646 | 0.7907 | 0.0000 | 0.9594 | 0.0000 | 0.7081 | 0.0000 | 0.0000 | 0.8656 | 0.8399 |
| IGF1_P933_F    | 0.0000 | 0.9862 | 0.9762 | 0.9195 | 0.9836 | 0.8994 | 0.0000 | 0.0000 | 0.9835 | 0.0039 | 0.8359 | 0.0454 |
| IGF1R_E186_R   | 0.0011 | 0.0005 | 0.0019 | 0.0023 | 0.0000 | 0.0004 | 0.0083 | 0.0006 | 0.0000 | 0.0002 | 0.0050 | 0.0000 |
| IGF1R_P325_R   | 0.3783 | 0.0121 | 0.0147 | 0.0172 | 0.4374 | 0.0175 | 0.0253 | 0.1126 | 0.0134 | 0.0211 | 0.0155 | 0.4474 |
| IGF2_E134_R    | 0.0000 | 0.0000 | 0.0000 | 0.4705 | 0.0000 | 0.0000 | 0.0000 | 0.0054 | 0.0000 | 0.0006 | 0.0145 | 0.0000 |
| IGF2_P1036_R   | 0.2477 | 0.0123 | 0.0121 | 0.1627 | 0.0159 | 0.0149 | 0.0147 | 0.0440 | 0.0176 | 0.0161 | 0.0207 | 0.1815 |
| IGF2_P36_R     | 0.2683 | 0.0055 | 0.2204 | 0.0120 | 0.0133 | 0.0213 | 0.0117 | 0.1949 | 0.0070 | 0.0180 | 0.0119 | 0.1043 |
| IGF2AS_P203_F  | 0.0000 | 0.0000 | 0.0000 | 0.0000 | 0.0000 | 0.1541 | 0.0000 | 0.0000 | 0.0000 | 0.0000 | 0.0000 | 0.0000 |
| IGF2R_P396_R   | 0.1573 | 0.2472 | 0.1840 | 0.1235 | 0.1412 | 0.0706 | 0.6156 | 0.2455 | 0.2494 | 0.2873 | 0.2830 | 0.3669 |
| IGFBP1_E48_R   | 0.0085 | 0.4308 | 0.0053 | 0.0064 | 0.0088 | 0.4240 | 0.0122 | 0.0111 | 0.0125 | 0.0000 | 0.0000 | 0.0027 |
| IGFBP1_P12_R   | 0.0000 | 0.3252 | 0.0123 | 0.5235 | 0.0098 | 0.0028 | 0.0217 | 0.0384 | 0.1450 | 0.0124 | 0.0301 | 0.0042 |
| IGFBP2_P306_F  | 0.0000 | 0.0000 | 0.0000 | 0.0000 | 0.0000 | 0.0000 | 0.0049 | 0.0037 | 0.0000 | 0.0003 | 0.0056 | 0.0007 |
| IGFBP3_E65_R   | 0.0171 | 0.0169 | 0.0305 | 0.0140 | 0.0171 | 0.0152 | 0.0205 | 0.1738 | 0.0111 | 0.3420 | 0.0148 | 0.5800 |
| IGFBP3_P1035_F | 0.0000 | 0.0009 | 0.0000 | 0.0000 | 0.0011 | 0.0000 | 0.0000 | 0.0032 | 0.0000 | 0.0000 | 0.0019 | 0.0000 |
| IGFBP3_P423_R  | 0.0080 | 0.0105 | 0.2521 | 0.0944 | 0.0123 | 0.0084 | 0.0103 | 0.1870 | 0.0102 | 0.0122 | 0.0148 | 0.0047 |
| IGFBP7_P371_F  | 0.0045 | 0.0125 | 0.0043 | 0.0056 | 0.0070 | 0.0061 | 0.0078 | 0.0097 | 0.1343 | 0.0131 | 0.0072 | 0.0041 |
| IGSF4_P454_F   | 0.0028 | 0.0000 | 0.0063 | 0.0053 | 0.0093 | 0.0036 | 0.0000 | 0.0010 | 0.0001 | 0.0069 | 0.0087 | 0.0062 |
| IGSF4_P86_R    | 0.0211 | 0.8851 | 0.0378 | 0.0195 | 0.0130 | 0.0179 | 0.8047 | 0.0198 | 0.0099 | 0.0242 | 0.0176 | 0.4631 |
| IGSF4C_E65_F   | 0.9830 | 0.0000 | 0.9388 | 0.8493 | 0.0000 | 0.9264 | 0.0000 | 0.9898 | 0.9228 | 0.9944 | 0.9861 | 0.0035 |
| IGSF4C_P533_R  | 0.0150 | 0.0000 | 0.0094 | 0.0084 | 0.0126 | 0.0049 | 0.0000 | 0.0093 | 0.0107 | 0.0066 | 0.0080 | 0.0000 |
| IHH_E186_F     | 0.0000 | 0.0000 | 0.0000 | 0.0037 | 0.0033 | 0.2724 | 0.0000 | 0.0000 | 0.0065 | 0.0168 | 0.0141 | 0.0000 |
| IHH_P246_R     | 0.0496 | 0.9855 | 0.0544 | 0.1580 | 0.0140 | 0.0090 | 0.0060 | 0.0067 | 0.0055 | 0.0090 | 0.0338 | 0.0000 |
| IHH_P529_F     | 0.0080 | 0.0000 | 0.0053 | 0.0108 | 0.0100 | 0.0075 | 0.0120 | 0.0184 | 0.0067 | 0.0149 | 0.0103 | 0.0000 |
| IL10_P85_F     | 0.0000 | 0.0026 | 0.3579 | 0.1762 | 0.0047 | 0.2844 | 0.0067 | 0.0000 | 0.0000 | 0.0000 | 0.0044 | 0.0000 |
| IL11_P11_R     | 0.2258 | 0.0050 | 0.0109 | 0.0086 | 0.0000 | 0.0094 | 0.0000 | 0.0000 | 0.0000 | 0.0000 | 0.0000 | 0.0000 |
| IL12A_E287_R   | 0.0019 | 0.0047 | 0.0020 | 0.0595 | 0.0060 | 0.0013 | 0.0065 | 0.0660 | 0.0895 | 0.0047 | 0.0068 | 0.9615 |
| IL12B_P392_R   | 0.0000 | 0.0013 | 0.1253 | 0.1900 | 0.0009 | 0.5908 | 0.0028 | 0.0821 | 0.0000 | 0.0002 | 0.0000 | 0.0014 |
| IL13_E75_R     | 0.9872 | 0.9872 | 0.9869 | 0.9808 | 0.6904 | 0.9832 | 0.9938 | 0.9898 | 0.9906 | 0.6660 | 0.7614 | 0.9916 |
| IL17RB_E164_R  | 0.0005 | 0.0005 | 0.0005 | 0.0026 | 0.0077 | 0.0885 | 0.0000 | 0.0000 | 0.0000 | 0.0000 | 0.0000 | 0.0000 |
| IL17RB_P788_R  | 0.0000 | 0.0000 | 0.0000 | 0.0000 | 0.0000 | 0.0000 | 0.0021 | 0.0000 | 0.0000 | 0.0021 | 0.0000 | 0.0000 |
| IL18BP_P51_R   | 0.0210 | 0.0677 | 0.0320 | 0.0271 | 0.0434 | 0.0310 | 0.0464 | 0.0490 | 0.0263 | 0.2795 | 0.0756 | 0.0309 |

|               |        |        |        |        |        |        |        |        |        |        |        |        |
|---------------|--------|--------|--------|--------|--------|--------|--------|--------|--------|--------|--------|--------|
| IL1A_E113_R   | 0.9898 | 0.9929 | 0.9294 | 0.9858 | 0.1398 | 0.9866 | 0.9941 | 0.9907 | 0.9781 | 0.8761 | 0.9456 | 0.8855 |
| IL1RN_E42_F   | 0.9852 | 0.9782 | 0.9850 | 0.9821 | 0.9865 | 0.9629 | 0.0000 | 0.9910 | 0.9894 | 0.9679 | 0.6686 | 0.9735 |
| IL3_P556_F    | 0.9844 | 0.0000 | 0.9862 | 0.9753 | 0.9853 | 0.9748 | 0.0000 | 0.9240 | 0.8317 | 0.9877 | 0.9814 | 0.0000 |
| IL6_E168_F    | 0.0071 | 0.0955 | 0.0113 | 0.0086 | 0.0114 | 0.2974 | 0.0172 | 0.0112 | 0.0000 | 0.0099 | 0.0157 | 0.0424 |
| IL8_E118_R    | 0.9859 | 0.0031 | 0.0009 | 0.0019 | 0.0000 | 0.0000 | 0.0000 | 0.0000 | 0.0000 | 0.0057 | 0.0065 | 0.0000 |
| IL8_P83_F     | 0.0000 | 0.0000 | 0.9044 | 0.0000 | 0.0000 | 0.4760 | 0.0000 | 0.0000 | 0.0000 | 0.0000 | 0.0000 | 0.0000 |
| IMPACT_P186_F | 0.0000 | 0.0000 | 0.0000 | 0.0000 | 0.0000 | 0.0000 | 0.0000 | 0.0000 | 0.0000 | 0.0000 | 0.0000 | 0.0018 |
| IMPACT_P234_R | 0.0000 | 0.0000 | 0.0023 | 0.0000 | 0.0000 | 0.0027 | 0.0000 | 0.0000 | 0.0000 | 0.0044 | 0.0051 | 0.0000 |
| INSR_P1063_R  | 0.0000 | 0.0000 | 0.0000 | 0.4835 | 0.0000 | 0.0000 | 0.0000 | 0.0000 | 0.0017 | 0.0010 | 0.7857 | 0.0026 |
| IPF1_P234_F   | 0.0004 | 0.0000 | 0.0001 | 0.0066 | 0.0053 | 0.5335 | 0.0000 | 0.0038 | 0.0000 | 0.0000 | 0.0076 | 0.0000 |
| IRAK1_P455_R  | 0.0063 | 0.0000 | 0.0112 | 0.0125 | 0.0071 | 0.4136 | 0.2342 | 0.0047 | 0.0042 | 0.0054 | 0.0074 | 0.0000 |
| IRAK3_E130_F  | 0.0031 | 0.0000 | 0.0065 | 0.0080 | 0.0119 | 0.0076 | 0.0082 | 0.0073 | 0.0000 | 0.0085 | 0.0135 | 0.0000 |
| IRAK3_P13_F   | 0.0068 | 0.0085 | 0.0000 | 0.0056 | 0.0000 | 0.0063 | 0.0138 | 0.0000 | 0.0000 | 0.0088 | 0.0127 | 0.0000 |
| IRF5_P123_F   | 0.0113 | 0.0054 | 0.0057 | 0.0119 | 0.0097 | 0.0600 | 0.0064 | 0.0162 | 0.5741 | 0.0094 | 0.0215 | 0.0016 |
| IRF7_P277_R   | 0.0189 | 0.4175 | 0.0093 | 0.0095 | 0.3647 | 0.0409 | 0.3359 | 0.0271 | 0.0052 | 0.0203 | 0.0129 | 0.1797 |
| ISL1_E87_R    | 0.0089 | 0.0000 | 0.0019 | 0.0063 | 0.0109 | 0.1462 | 0.0106 | 0.0000 | 0.0004 | 0.0100 | 0.0146 | 0.0068 |
| ISL1_P379_F   | 0.0038 | 0.0000 | 0.0042 | 0.0576 | 0.0071 | 0.1097 | 0.0000 | 0.0000 | 0.0025 | 0.0060 | 0.0815 | 0.0031 |
| ISL1_P554_F   | 0.0000 | 0.0000 | 0.0000 | 0.0000 | 0.0000 | 0.0000 | 0.0000 | 0.0000 | 0.0000 | 0.0000 | 0.0000 | 0.0000 |
| ITGA2_E120_F  | 0.0079 | 0.0119 | 0.0068 | 0.0088 | 0.0112 | 0.0080 | 0.0000 | 0.0057 | 0.6743 | 0.0099 | 0.0126 | 0.0000 |
| ITGA2_P26_R   | 0.0017 | 0.0000 | 0.0023 | 0.0000 | 0.0000 | 0.0000 | 0.0000 | 0.0000 | 0.0000 | 0.0000 | 0.0010 | 0.0000 |
| ITGB4_E144_F  | 0.0115 | 0.0000 | 0.0017 | 0.0078 | 0.0110 | 0.0035 | 0.0000 | 0.0119 | 0.0000 | 0.0084 | 0.0143 | 0.0000 |
| ITGB4_P517_F  | 0.0000 | 0.9696 | 0.0000 | 0.3610 | 0.0000 | 0.0000 | 0.0000 | 0.0000 | 0.0000 | 0.0016 | 0.0000 | 0.0000 |
| ITPR3_E86_R   | 0.0000 | 0.0000 | 0.0000 | 0.0000 | 0.0002 | 0.0000 | 0.0046 | 0.0000 | 0.0000 | 0.0046 | 0.0000 | 0.0000 |
| ITPR3_P1112_F | 0.0000 | 0.0000 | 0.0000 | 0.0021 | 0.0057 | 0.0000 | 0.0000 | 0.0004 | 0.0000 | 0.0017 | 0.0012 | 0.0000 |
| JAG2_E54_F    | 0.0028 | 0.0045 | 0.0057 | 0.0063 | 0.0072 | 0.0508 | 0.0000 | 0.0092 | 0.0049 | 0.0066 | 0.0053 | 0.0000 |
| JAG2_P264_F   | 0.0138 | 0.2809 | 0.0109 | 0.0137 | 0.0177 | 0.0114 | 0.0134 | 0.0269 | 0.0083 | 0.0107 | 0.0070 | 0.3762 |
| JAK2_P772_R   | 0.0291 | 0.0249 | 0.0103 | 0.0120 | 0.2785 | 0.0127 | 0.0000 | 0.0105 | 0.0055 | 0.0130 | 0.0000 | 0.1813 |
| JAK3_E64_F    | 0.0043 | 0.0000 | 0.0049 | 0.0150 | 0.0060 | 0.0947 | 0.0000 | 0.0100 | 0.0012 | 0.0053 | 0.0134 | 0.0000 |
| JAK3_P156_R   | 0.0129 | 0.0130 | 0.0084 | 0.1803 | 0.0115 | 0.0169 | 0.1043 | 0.0142 | 0.0066 | 0.0136 | 0.0127 | 0.0115 |
| JUNB_P1149_R  | 0.5006 | 0.4723 | 0.5447 | 0.0686 | 0.1725 | 0.0657 | 0.1306 | 0.1616 | 0.0637 | 0.5992 | 0.1199 | 0.5234 |
| KCNK4_E3_F    | 0.7023 | 0.0002 | 0.5012 | 0.0066 | 0.0068 | 0.1866 | 0.0038 | 0.0031 | 0.0000 | 0.8213 | 0.0204 | 0.0019 |
| KDR_E79_F     | 0.0298 | 0.0621 | 0.0137 | 0.0087 | 0.6966 | 0.0101 | 0.7983 | 0.0225 | 0.0681 | 0.0246 | 0.0187 | 0.0300 |
| KDR_P445_R    | 0.0004 | 0.0000 | 0.0050 | 0.0088 | 0.0057 | 0.0050 | 0.0000 | 0.0000 | 0.0000 | 0.0066 | 0.0000 | 0.0052 |

|                 |        |        |        |        |        |        |        |        |        |        |        |        |
|-----------------|--------|--------|--------|--------|--------|--------|--------|--------|--------|--------|--------|--------|
| KIAA1804_P689_R | 0.0099 | 0.0125 | 0.0361 | 0.0122 | 0.0171 | 0.0077 | 0.0124 | 0.0072 | 0.0036 | 0.0109 | 0.0117 | 0.1507 |
| KIT_P367_R      | 0.0074 | 0.0027 | 0.0027 | 0.0061 | 0.0065 | 0.0046 | 0.0057 | 0.0046 | 0.0000 | 0.0056 | 0.3413 | 0.0000 |
| KIT_P405_F      | 0.0056 | 0.0010 | 0.0056 | 0.0601 | 0.4956 | 0.0664 | 0.0000 | 0.4450 | 0.0017 | 0.0094 | 0.0109 | 0.0068 |
| KLF5_E190_R     | 0.0020 | 0.0000 | 0.7250 | 0.0048 | 0.0080 | 0.0877 | 0.0000 | 0.0039 | 0.0000 | 0.0043 | 0.0050 | 0.0025 |
| KLK11_P103_R    | 0.0000 | 0.8502 | 0.8759 | 0.7935 | 0.0000 | 0.9673 | 0.0000 | 0.0064 | 0.9811 | 0.0000 | 0.0050 | 0.0002 |
| KLK11_P1290_F   | 0.9875 | 0.0000 | 0.9826 | 0.9783 | 0.0000 | 0.9304 | 0.0000 | 0.0000 | 0.0011 | 0.9848 | 0.8817 | 0.0000 |
| KRAS_E82_F      | 0.8426 | 0.9465 | 0.5058 | 0.6217 | 0.8815 | 0.6901 | 0.1859 | 0.7822 | 0.2635 | 0.0026 | 0.5727 | 0.9899 |
| KRAS_P651_F     | 0.0640 | 0.5145 | 0.1043 | 0.0692 | 0.0872 | 0.0459 | 0.2082 | 0.0640 | 0.1509 | 0.1103 | 0.4065 | 0.1466 |
| KRT13_P341_R    | 0.9885 | 0.9743 | 0.6710 | 0.9816 | 0.0100 | 0.9757 | 0.9942 | 0.0000 | 0.9861 | 0.9533 | 0.9422 | 0.9903 |
| KRT5_P308_F     | 0.7887 | 0.2776 | 0.8153 | 0.8545 | 0.8783 | 0.8466 | 0.2094 | 0.1432 | 0.1405 | 0.7817 | 0.2439 | 0.9703 |
| L1CAM_P148_R    | 0.0044 | 0.0329 | 0.0094 | 0.0032 | 0.0114 | 0.0027 | 0.0000 | 0.0000 | 0.0006 | 0.0049 | 0.0075 | 0.0036 |
| L1CAM_P19_F     | 0.5987 | 0.0000 | 0.0030 | 0.6788 | 0.3817 | 0.1756 | 0.0000 | 0.0021 | 0.0060 | 0.0075 | 0.0085 | 0.0000 |
| LAMC1_E466_R    | 0.0063 | 0.0048 | 0.0060 | 0.0028 | 0.0000 | 0.0011 | 0.0000 | 0.0044 | 0.0008 | 0.0054 | 0.0066 | 0.0054 |
| LIF_E208_F      | 0.1198 | 0.2127 | 0.0094 | 0.0121 | 0.0083 | 0.0068 | 0.1876 | 0.0135 | 0.0068 | 0.0094 | 0.0285 | 0.0094 |
| LIF_P383_R      | 0.0237 | 0.0056 | 0.0000 | 0.0094 | 0.0018 | 0.3670 | 0.0059 | 0.0000 | 0.0000 | 0.0093 | 0.0107 | 0.0000 |
| LIG4_P194_F     | 0.0056 | 0.0063 | 0.0084 | 0.0098 | 0.0085 | 0.0098 | 0.0099 | 0.0109 | 0.0010 | 0.0092 | 0.0211 | 0.0000 |
| LMO1_E265_R     | 0.0000 | 0.0000 | 0.0027 | 0.0044 | 0.0034 | 0.0000 | 0.0000 | 0.0056 | 0.0000 | 0.0004 | 0.8148 | 0.0025 |
| LMO1_P169_F     | 0.0068 | 0.0049 | 0.0079 | 0.0075 | 0.0093 | 0.0063 | 0.0087 | 0.0061 | 0.0069 | 0.0075 | 0.0118 | 0.0000 |
| LOX_P313_R      | 0.0142 | 0.1133 | 0.0113 | 0.0174 | 0.0220 | 0.1581 | 0.1390 | 0.0174 | 0.0081 | 0.0231 | 0.0205 | 0.0992 |
| LOX_P71_F       | 0.0011 | 0.0023 | 0.0013 | 0.0031 | 0.0067 | 0.0013 | 0.0058 | 0.0077 | 0.0033 | 0.0019 | 0.0073 | 0.0041 |
| LRP2_E20_F      | 0.0333 | 0.0545 | 0.0682 | 0.0320 | 0.0996 | 0.0276 | 0.0283 | 0.0288 | 0.0246 | 0.0415 | 0.0253 | 0.5462 |
| LRRC32_P865_R   | 0.0025 | 0.0068 | 0.0048 | 0.0050 | 0.0098 | 0.0540 | 0.0103 | 0.0081 | 0.0005 | 0.0105 | 0.0104 | 0.0059 |
| LTB4R_E64_R     | 0.0624 | 0.4781 | 0.0262 | 0.1958 | 0.6274 | 0.0420 | 0.6093 | 0.0830 | 0.5796 | 0.0534 | 0.0329 | 0.0290 |
| LYN_E353_F      | 0.0000 | 0.0000 | 0.0000 | 0.4026 | 0.0000 | 0.0000 | 0.0000 | 0.0000 | 0.0000 | 0.0085 | 0.0000 | 0.0000 |
| LYN_P241_F      | 0.2973 | 0.0585 | 0.0388 | 0.0787 | 0.0347 | 0.0318 | 0.0846 | 0.0327 | 0.1145 | 0.0405 | 0.0308 | 0.0509 |
| MAF_P826_R      | 0.0000 | 0.0000 | 0.0000 | 0.0000 | 0.0000 | 0.0000 | 0.0007 | 0.0000 | 0.0000 | 0.0000 | 0.0015 | 0.0000 |
| MAGEC3_P903_F   | 0.0000 | 0.0000 | 0.0000 | 0.6315 | 0.0000 | 0.9449 | 0.0000 | 0.0000 | 0.0000 | 0.0000 | 0.0000 | 0.0000 |
| MAGEL2_E166_R   | 0.0000 | 0.0000 | 0.0000 | 0.9262 | 0.9818 | 0.9642 | 0.0000 | 0.0179 | 0.0012 | 0.9789 | 0.0088 | 0.0993 |
| MALT1_P406_R    | 0.0004 | 0.0027 | 0.0023 | 0.0042 | 0.0028 | 0.0019 | 0.0000 | 0.0000 | 0.0000 | 0.0055 | 0.0036 | 0.0060 |
| MAP2K6_E297_F   | 0.0000 | 0.0023 | 0.0000 | 0.0003 | 0.0029 | 0.1601 | 0.0000 | 0.0000 | 0.0000 | 0.0025 | 0.0050 | 0.0000 |
| MAP2K6_P297_R   | 0.0127 | 0.0136 | 0.3409 | 0.0153 | 0.0162 | 0.0700 | 0.1246 | 0.3619 | 0.0159 | 0.7351 | 0.0185 | 0.0119 |
| MAP3K1_P7_F     | 0.5941 | 0.0104 | 0.6030 | 0.0289 | 0.0317 | 0.0297 | 0.6257 | 0.0157 | 0.0271 | 0.0217 | 0.0189 | 0.1076 |
| MAP3K9_E17_R    | 0.0000 | 0.0000 | 0.0372 | 0.0199 | 0.0118 | 0.0216 | 0.0081 | 0.0120 | 0.4527 | 0.0681 | 0.2668 | 0.0000 |

|                    |        |        |        |        |        |        |        |        |        |        |        |        |
|--------------------|--------|--------|--------|--------|--------|--------|--------|--------|--------|--------|--------|--------|
| MAPK12_E165_R      | 0.0066 | 0.0080 | 0.0077 | 0.0079 | 0.0116 | 0.0055 | 0.0081 | 0.0042 | 0.0044 | 0.0067 | 0.0142 | 0.0044 |
| MAPK12_P416_F      | 0.0000 | 0.0000 | 0.0000 | 0.0004 | 0.0000 | 0.0000 | 0.0000 | 0.0000 | 0.0000 | 0.0000 | 0.0013 | 0.0000 |
| MAPK14_P327_R      | 0.0125 | 0.0023 | 0.0040 | 0.0027 | 0.0047 | 0.0000 | 0.8790 | 0.0150 | 0.0000 | 0.0621 | 0.0508 | 0.0080 |
| MAPK4_E273_R       | 0.7201 | 0.0072 | 0.2240 | 0.8860 | 0.0000 | 0.8615 | 0.9954 | 0.9826 | 0.9882 | 0.0000 | 0.9840 | 0.0000 |
| MAPK9_P1175_F      | 0.0000 | 0.9885 | 0.9830 | 0.9810 | 0.0000 | 0.9724 | 0.9921 | 0.9908 | 0.9288 | 0.0000 | 0.0000 | 0.0000 |
| MAS1_P469_R        | 0.9747 | 0.9701 | 0.7388 | 0.9825 | 0.5564 | 0.9815 | 0.9918 | 0.6472 | 0.7309 | 0.9895 | 0.9790 | 0.9595 |
| MATK_P64_F         | 0.0056 | 0.0631 | 0.0060 | 0.0078 | 0.0085 | 0.0711 | 0.0665 | 0.0067 | 0.0058 | 0.0059 | 0.0097 | 0.0570 |
| MC2R_P1025_F       | 0.0000 | 0.0000 | 0.9703 | 0.9187 | 0.7144 | 0.9413 | 0.0000 | 0.0000 | 0.0000 | 0.0000 | 0.0294 | 0.0000 |
| MCAM_P169_R        | 0.0044 | 0.0091 | 0.0051 | 0.1072 | 0.0108 | 0.0048 | 0.0041 | 0.0000 | 0.0014 | 0.0089 | 0.0054 | 0.0000 |
| MCAM_P265_R        | 0.4624 | 0.0095 | 0.6482 | 0.1119 | 0.0165 | 0.0166 | 0.0073 | 0.0598 | 0.0073 | 0.0143 | 0.0376 | 0.0583 |
| MCC_P196_R         | 0.0000 | 0.0000 | 0.0010 | 0.0000 | 0.0000 | 0.0000 | 0.0038 | 0.0000 | 0.0000 | 0.0015 | 0.0000 | 0.0000 |
| MCM2_P241_R        | 0.0071 | 0.0000 | 0.0046 | 0.0617 | 0.0110 | 0.0055 | 0.0673 | 0.0090 | 0.0032 | 0.0088 | 0.0128 | 0.0058 |
| MDR1_seq_42_S300_R | 0.0058 | 0.0071 | 0.0103 | 0.0078 | 0.0087 | 0.0035 | 0.0380 | 0.0000 | 0.0063 | 0.0095 | 0.0085 | 0.0000 |
| MDS1_E45_F         | 0.0036 | 0.0000 | 0.0062 | 0.0077 | 0.0140 | 0.0113 | 0.3593 | 0.0064 | 0.0169 | 0.0124 | 0.0117 | 0.0137 |
| MECP2_E90_R        | 0.8400 | 0.0071 | 0.0060 | 0.1201 | 0.8119 | 0.2628 | 0.0000 | 0.0088 | 0.0025 | 0.0148 | 0.0092 | 0.0050 |
| MEG3_E91_F         | 0.0000 | 0.0000 | 0.0000 | 0.0001 | 0.0083 | 0.2906 | 0.0000 | 0.0000 | 0.0000 | 0.0000 | 0.0064 | 0.0000 |
| MEST_E150_F        | 0.0006 | 0.0000 | 0.0000 | 0.0013 | 0.0011 | 0.0003 | 0.0034 | 0.9872 | 0.0000 | 0.0009 | 0.0072 | 0.0000 |
| MEST_P4_F          | 0.0006 | 0.0000 | 0.0000 | 0.0027 | 0.0047 | 0.0027 | 0.0000 | 0.0000 | 0.0000 | 0.0030 | 0.0043 | 0.0000 |
| MEST_P62_R         | 0.0000 | 0.0000 | 0.0667 | 0.0004 | 0.0037 | 0.0000 | 0.0000 | 0.0000 | 0.0000 | 0.0000 | 0.0083 | 0.0010 |
| MET_E333_F         | 0.9788 | 0.0000 | 0.0201 | 0.7155 | 0.9817 | 0.2008 | 0.0000 | 0.0143 | 0.0463 | 0.5997 | 0.0245 | 0.0313 |
| MFAP4_P197_F       | 0.0009 | 0.0000 | 0.0000 | 0.3249 | 0.0047 | 0.0257 | 0.0000 | 0.0000 | 0.0010 | 0.0064 | 0.0037 | 0.0000 |
| MGMT_P272_R        | 0.0000 | 0.0000 | 0.0057 | 0.3282 | 0.0015 | 0.0006 | 0.0000 | 0.0011 | 0.0000 | 0.0000 | 0.0000 | 0.0036 |
| MGMT_P281_F        | 0.0155 | 0.5380 | 0.0091 | 0.1495 | 0.0110 | 0.1084 | 0.0167 | 0.4366 | 0.0139 | 0.0150 | 0.0177 | 0.0081 |
| MKRN3_P108_F       | 0.9730 | 0.0000 | 0.9750 | 0.9715 | 0.9732 | 0.9653 | 0.0000 | 0.9718 | 0.9835 | 0.9744 | 0.9800 | 0.0000 |
| MLF1_P97_F         | 0.0130 | 0.0105 | 0.0000 | 0.0956 | 0.0143 | 0.0074 | 0.0099 | 0.0089 | 0.0068 | 0.0096 | 0.0100 | 0.0354 |
| MLH1_P381_F        | 0.0722 | 0.0036 | 0.0058 | 0.0050 | 0.0139 | 0.0033 | 0.0000 | 0.3792 | 0.0069 | 0.0091 | 0.0114 | 0.0035 |
| MLH3_E72_F         | 0.0000 | 0.0000 | 0.0011 | 0.0046 | 0.0095 | 0.0009 | 0.0000 | 0.0043 | 0.0000 | 0.0047 | 0.0052 | 0.0052 |
| MLH3_P25_F         | 0.0005 | 0.0024 | 0.1084 | 0.1855 | 0.0037 | 0.1322 | 0.0000 | 0.0064 | 0.2765 | 0.0029 | 0.0095 | 0.9907 |
| MLLT3_E93_R        | 0.0015 | 0.0014 | 0.0000 | 0.0022 | 0.0057 | 0.0000 | 0.0076 | 0.0000 | 0.0000 | 0.0049 | 0.0081 | 0.0044 |
| MLLT4_P1400_F      | 0.0140 | 0.0196 | 0.0178 | 0.0258 | 0.0218 | 0.0183 | 0.0192 | 0.0122 | 0.0150 | 0.1826 | 0.0311 | 0.0139 |
| MLLT6_P957_F       | 0.0004 | 0.0000 | 0.0000 | 0.0010 | 0.0000 | 0.0000 | 0.0000 | 0.0000 | 0.0000 | 0.0000 | 0.0029 | 0.0000 |
| MME_E29_F          | 0.0076 | 0.0129 | 0.0040 | 0.0000 | 0.0059 | 0.0000 | 0.0009 | 0.0041 | 0.9587 | 0.0046 | 0.0086 | 0.0000 |
| MME_P388_F         | 0.0000 | 0.0000 | 0.0000 | 0.0000 | 0.0000 | 0.0000 | 0.0000 | 0.0000 | 0.0000 | 0.0000 | 0.0003 | 0.6987 |

|              |        |        |        |        |        |        |        |        |        |        |        |        |
|--------------|--------|--------|--------|--------|--------|--------|--------|--------|--------|--------|--------|--------|
| MMP19_E274_R | 0.9909 | 0.9624 | 0.9872 | 0.9482 | 0.9514 | 0.9838 | 0.9926 | 0.9350 | 0.8758 | 0.9921 | 0.8495 | 0.9930 |
| MMP2_E21_R   | 0.9150 | 0.0000 | 0.0020 | 0.1738 | 0.0042 | 0.2329 | 0.0050 | 0.0000 | 0.0000 | 0.0087 | 0.0223 | 0.0018 |
| MMP2_P197_F  | 0.0074 | 0.0000 | 0.0052 | 0.0071 | 0.0074 | 0.0040 | 0.0000 | 0.0092 | 0.0026 | 0.0088 | 0.0087 | 0.0000 |
| MMP2_P303_R  | 0.0056 | 0.0081 | 0.0080 | 0.0085 | 0.0133 | 0.0169 | 0.0058 | 0.2215 | 0.0065 | 0.0085 | 0.3249 | 0.3380 |
| MMP3_P16_R   | 0.9836 | 0.9860 | 0.8357 | 0.9804 | 0.0000 | 0.9758 | 0.0000 | 0.9868 | 0.9087 | 0.9913 | 0.9861 | 0.0000 |
| MMP7_P613_F  | 0.9203 | 0.9304 | 0.9528 | 0.6960 | 0.3283 | 0.8639 | 0.1837 | 0.8906 | 0.9388 | 0.8726 | 0.9703 | 0.2254 |
| MMP9_P189_F  | 0.0060 | 0.0150 | 0.0071 | 0.0120 | 0.0155 | 0.2663 | 0.0000 | 0.0075 | 0.0042 | 0.0000 | 0.0154 | 0.1754 |
| MMP9_P237_R  | 0.0095 | 0.0125 | 0.0079 | 0.1239 | 0.3669 | 0.0101 | 0.0079 | 0.0077 | 0.0101 | 0.4092 | 0.0130 | 0.0041 |
| MOS_E60_R    | 0.0036 | 0.0129 | 0.0043 | 0.3473 | 0.0088 | 0.1560 | 0.0551 | 0.0082 | 0.0175 | 0.0145 | 0.0083 | 0.0035 |
| MPO_P883_R   | 0.0068 | 0.0024 | 0.0021 | 0.1175 | 0.0047 | 0.0848 | 0.0000 | 0.0016 | 0.0035 | 0.0023 | 0.0060 | 0.9902 |
| MSH3_E3_F    | 0.9684 | 0.9884 | 0.9863 | 0.8797 | 0.9828 | 0.9416 | 0.9825 | 0.0000 | 0.9693 | 0.6604 | 0.8826 | 0.0000 |
| MSH3_P13_R   | 0.8387 | 0.8834 | 0.7348 | 0.6582 | 0.0129 | 0.5041 | 0.7799 | 0.0112 | 0.6962 | 0.8508 | 0.2835 | 0.9869 |
| MST1R_P392_F | 0.0000 | 0.0000 | 0.0000 | 0.0000 | 0.0022 | 0.0000 | 0.0016 | 0.0000 | 0.0000 | 0.0000 | 0.0000 | 0.0000 |
| MT1A_E13_R   | 0.0364 | 0.0083 | 0.0070 | 0.0434 | 0.0115 | 0.1081 | 0.0131 | 0.0666 | 0.2284 | 0.0085 | 0.4128 | 0.0048 |
| MT1A_P49_R   | 0.0000 | 0.0000 | 0.0000 | 0.0999 | 0.0008 | 0.0000 | 0.0000 | 0.0000 | 0.0000 | 0.0000 | 0.0023 | 0.0000 |
| MTA1_P478_F  | 0.1860 | 0.0156 | 0.0084 | 0.2498 | 0.0928 | 0.0134 | 0.0108 | 0.0112 | 0.1352 | 0.1505 | 0.0220 | 0.1082 |
| MUC1_E18_R   | 0.9449 | 0.0047 | 0.0000 | 0.7682 | 0.0000 | 0.7017 | 0.0000 | 0.0000 | 0.0000 | 0.0603 | 0.0054 | 0.0000 |
| MUC1_P191_F  | 0.0018 | 0.0000 | 0.0000 | 0.0068 | 0.0000 | 0.0052 | 0.0000 | 0.0083 | 0.0000 | 0.0000 | 0.0058 | 0.0049 |
| MXI1_P75_R   | 0.0016 | 0.0064 | 0.0054 | 0.0029 | 0.0082 | 0.2648 | 0.0154 | 0.0076 | 0.0000 | 0.0070 | 0.0098 | 0.0010 |
| MYBL2_P211_F | 0.0000 | 0.8672 | 0.0000 | 0.0089 | 0.0128 | 0.0273 | 0.0094 | 0.0787 | 0.0000 | 0.0181 | 0.0115 | 0.0065 |
| MYCL1_P502_R | 0.0000 | 0.0000 | 0.0000 | 0.0000 | 0.0070 | 0.1523 | 0.0094 | 0.0042 | 0.0000 | 0.0027 | 0.0059 | 0.0000 |
| MYCN_E77_R   | 0.0102 | 0.0074 | 0.0113 | 0.1009 | 0.0293 | 0.0734 | 0.0127 | 0.0107 | 0.0038 | 0.0163 | 0.0222 | 0.0000 |
| MYCN_P464_R  | 0.0057 | 0.0037 | 0.0058 | 0.0075 | 0.0080 | 0.0032 | 0.0000 | 0.0129 | 0.0009 | 0.0059 | 0.0072 | 0.0000 |
| MYH11_P22_F  | 0.0027 | 0.0000 | 0.0035 | 0.0048 | 0.0074 | 0.1496 | 0.0750 | 0.0095 | 0.0035 | 0.0000 | 0.0090 | 0.0348 |
| MYH11_P236_R | 0.0000 | 0.0000 | 0.0000 | 0.0000 | 0.0000 | 0.0000 | 0.0000 | 0.0000 | 0.0000 | 0.0000 | 0.0000 | 0.0000 |
| MYLK_P469_R  | 0.0086 | 0.0160 | 0.0095 | 0.0114 | 0.9836 | 0.1941 | 0.0093 | 0.0109 | 0.0064 | 0.0097 | 0.0097 | 0.4278 |
| MYOD1_E156_F | 0.0014 | 0.0000 | 0.0021 | 0.0023 | 0.0063 | 0.0686 | 0.0000 | 0.0000 | 0.0000 | 0.0039 | 0.0048 | 0.0006 |
| MYOD1_P50_F  | 0.0000 | 0.0000 | 0.0000 | 0.0000 | 0.0013 | 0.0000 | 0.0000 | 0.0000 | 0.0000 | 0.0000 | 0.0000 | 0.0025 |
| NBL1_E205_R  | 0.9884 | 0.1284 | 0.8571 | 0.8578 | 0.9400 | 0.9821 | 0.9193 | 0.0583 | 0.0369 | 0.9879 | 0.7605 | 0.8561 |
| NBL1_P24_F   | 0.9873 | 0.0000 | 0.0416 | 0.8084 | 0.1297 | 0.9349 | 0.9891 | 0.0117 | 0.4603 | 0.9741 | 0.7766 | 0.9838 |
| NCL_P840_R   | 0.0096 | 0.0000 | 0.0041 | 0.0071 | 0.0116 | 0.0070 | 0.0160 | 0.0150 | 0.0012 | 0.0107 | 0.0105 | 0.0118 |
| NDN_P1110_F  | 0.9736 | 0.9498 | 0.9805 | 0.9640 | 0.9779 | 0.9694 | 0.0000 | 0.0000 | 0.0000 | 0.9772 | 0.9784 | 0.9816 |
| NEFL_E23_R   | 0.6641 | 0.9939 | 0.9702 | 0.5682 | 0.8697 | 0.4783 | 0.9616 | 0.9941 | 0.9863 | 0.9950 | 0.8536 | 0.9920 |

|                |        |        |        |        |        |        |        |        |        |        |        |        |
|----------------|--------|--------|--------|--------|--------|--------|--------|--------|--------|--------|--------|--------|
| NEFL_P209_R    | 0.0000 | 0.0000 | 0.0000 | 0.0000 | 0.0000 | 0.0000 | 0.0033 | 0.0000 | 0.0000 | 0.0007 | 0.0018 | 0.0000 |
| NEO1_P1067_F   | 0.0019 | 0.0000 | 0.0000 | 0.4649 | 0.0000 | 0.0000 | 0.0213 | 0.0000 | 0.0000 | 0.0000 | 0.0000 | 0.0000 |
| NES_P239_R     | 0.0000 | 0.0000 | 0.0000 | 0.0000 | 0.0000 | 0.3304 | 0.0000 | 0.0000 | 0.0029 | 0.0000 | 0.0048 | 0.0023 |
| NEU1_P745_F    | 0.0083 | 0.0051 | 0.0000 | 0.0047 | 0.0028 | 0.0021 | 0.0000 | 0.0018 | 0.0041 | 0.0053 | 0.0028 | 0.0000 |
| NFKB1_P336_R   | 0.0120 | 0.0279 | 0.0098 | 0.0209 | 0.0286 | 0.0070 | 0.3971 | 0.0000 | 0.0000 | 0.0149 | 0.9801 | 0.0000 |
| NFKB2_P709_R   | 0.0195 | 0.0126 | 0.3416 | 0.0287 | 0.0528 | 0.0267 | 0.1832 | 0.0133 | 0.0118 | 0.0295 | 0.0355 | 0.2536 |
| NGFB_E353_F    | 0.0020 | 0.0015 | 0.0019 | 0.0742 | 0.0069 | 0.0000 | 0.0000 | 0.0014 | 0.0000 | 0.0068 | 0.0083 | 0.6968 |
| NGFB_P13_F     | 0.5225 | 0.3535 | 0.1448 | 0.1143 | 0.0338 | 0.1879 | 0.1522 | 0.1104 | 0.1800 | 0.0394 | 0.1643 | 0.2920 |
| NGFR_E328_F    | 0.0000 | 0.0000 | 0.0045 | 0.0018 | 0.0202 | 0.1544 | 0.0000 | 0.0000 | 0.0000 | 0.0013 | 0.0104 | 0.0000 |
| NGFR_P355_F    | 0.0595 | 0.1152 | 0.0545 | 0.3012 | 0.0756 | 0.0550 | 0.0795 | 0.0531 | 0.2816 | 0.0818 | 0.0647 | 0.0451 |
| NKX3-1_P146_F  | 0.0072 | 0.0000 | 0.0042 | 0.0074 | 0.7643 | 0.0078 | 0.0000 | 0.0000 | 0.0022 | 0.0000 | 0.0129 | 0.0000 |
| NKX3-1_P871_R  | 0.9876 | 0.9769 | 0.7536 | 0.9753 | 0.9826 | 0.9812 | 0.0049 | 0.9854 | 0.9851 | 0.9783 | 0.9848 | 0.9922 |
| NOTCH1_E452_R  | 0.0000 | 0.0000 | 0.0000 | 0.0000 | 0.0000 | 0.0000 | 0.0000 | 0.0000 | 0.0000 | 0.0000 | 0.0000 | 0.0000 |
| NOTCH1_P1198_F | 0.8108 | 0.0000 | 0.0000 | 0.1045 | 0.0000 | 0.1223 | 0.0000 | 0.0000 | 0.0000 | 0.0000 | 0.0048 | 0.0003 |
| NOTCH2_P312_R  | 0.0040 | 0.0058 | 0.0021 | 0.0035 | 0.0055 | 0.0017 | 0.0089 | 0.0049 | 0.0009 | 0.0047 | 0.0060 | 0.0034 |
| NOTCH3_E403_F  | 0.0000 | 0.0000 | 0.0000 | 0.5305 | 0.0000 | 0.0000 | 0.0000 | 0.0000 | 0.0000 | 0.0000 | 0.0000 | 0.0000 |
| NPR2_P618_F    | 0.0000 | 0.0000 | 0.9530 | 0.6402 | 0.0201 | 0.2963 | 0.0000 | 0.0051 | 0.0072 | 0.0046 | 0.0105 | 0.0000 |
| NPY_P295_F     | 0.0230 | 0.8069 | 0.5498 | 0.0324 | 0.0540 | 0.0199 | 0.5564 | 0.0519 | 0.0198 | 0.0318 | 0.0311 | 0.4415 |
| NPY_P91_F      | 0.0079 | 0.1114 | 0.0216 | 0.0206 | 0.0187 | 0.0148 | 0.1063 | 0.0151 | 0.0092 | 0.1074 | 0.0168 | 0.0127 |
| NQO1_E74_R     | 0.0000 | 0.0000 | 0.0034 | 0.0064 | 0.0077 | 0.0057 | 0.0084 | 0.0042 | 0.0001 | 0.0119 | 0.0105 | 0.0000 |
| NQO1_P345_R    | 0.0000 | 0.0030 | 0.0000 | 0.0703 | 0.0041 | 0.0000 | 0.0004 | 0.0042 | 0.0000 | 0.0000 | 0.0039 | 0.0021 |
| NR2F6_E375_R   | 0.0054 | 0.0104 | 0.0116 | 0.0099 | 0.0094 | 0.0557 | 0.0107 | 0.0171 | 0.0300 | 0.0050 | 0.0098 | 0.0158 |
| NRAS_P103_R    | 0.0000 | 0.0021 | 0.0023 | 0.0005 | 0.0034 | 0.0000 | 0.0000 | 0.0000 | 0.0017 | 0.0000 | 0.0000 | 0.0000 |
| NRAS_P12_R     | 0.0000 | 0.0000 | 0.0000 | 0.0000 | 0.0000 | 0.0000 | 0.0000 | 0.0000 | 0.0000 | 0.0000 | 0.0000 | 0.0000 |
| NRG1_E74_F     | 0.0000 | 0.0000 | 0.0000 | 0.0034 | 0.0001 | 0.0872 | 0.0000 | 0.0001 | 0.0000 | 0.7531 | 0.0069 | 0.0000 |
| NRG1_P558_R    | 0.0051 | 0.0114 | 0.0064 | 0.0056 | 0.0056 | 0.0025 | 0.0067 | 0.0750 | 0.0023 | 0.0056 | 0.5759 | 0.0277 |
| NTRK2_P10_F    | 0.0000 | 0.0480 | 0.0088 | 0.0072 | 0.0102 | 0.0061 | 0.0028 | 0.0052 | 0.0101 | 0.0046 | 0.0076 | 0.0040 |
| NTRK2_P395_R   | 0.0000 | 0.0000 | 0.0000 | 0.0866 | 0.0045 | 0.0000 | 0.0000 | 0.0019 | 0.0000 | 0.0016 | 0.0000 | 0.0000 |
| NTRK3_E131_F   | 0.0034 | 0.0000 | 0.0004 | 0.0016 | 0.0088 | 0.0000 | 0.0000 | 0.0008 | 0.0000 | 0.0065 | 0.0083 | 0.0032 |
| NTRK3_P636_R   | 0.0000 | 0.0000 | 0.0000 | 0.1512 | 0.0000 | 0.0000 | 0.0000 | 0.0000 | 0.0000 | 0.0000 | 0.0000 | 0.0000 |
| NTRK3_P752_F   | 0.0000 | 0.0050 | 0.0011 | 0.0000 | 0.0000 | 0.0000 | 0.0000 | 0.0025 | 0.0000 | 0.0000 | 0.0025 | 0.0000 |
| NTSR1_E109_F   | 0.0097 | 0.0078 | 0.0042 | 0.0082 | 0.0084 | 0.0053 | 0.0084 | 0.0071 | 0.0020 | 0.0054 | 0.0160 | 0.0097 |
| NTSR1_P318_F   | 0.0190 | 0.0268 | 0.5585 | 0.0166 | 0.0071 | 0.0127 | 0.0845 | 0.0093 | 0.0040 | 0.0113 | 0.0437 | 0.7313 |

|                    |        |        |        |        |        |        |        |        |        |        |        |        |
|--------------------|--------|--------|--------|--------|--------|--------|--------|--------|--------|--------|--------|--------|
| OAT_P465_F         | 0.7767 | 0.0110 | 0.9072 | 0.4833 | 0.0138 | 0.2500 | 0.3295 | 0.0165 | 0.0057 | 0.0105 | 0.4973 | 0.3166 |
| ODC1_P424_F        | 0.0000 | 0.0000 | 0.0000 | 0.0000 | 0.0040 | 0.0000 | 0.0000 | 0.0000 | 0.0000 | 0.0046 | 0.0046 | 0.0004 |
| ONECUT2_E96_F      | 0.0582 | 0.0090 | 0.0343 | 0.0304 | 0.0000 | 0.0258 | 0.0000 | 0.0000 | 0.4845 | 0.3684 | 0.0439 | 0.2188 |
| ONECUT2_P315_R     | 0.0000 | 0.0000 | 0.0000 | 0.0011 | 0.0081 | 0.0000 | 0.0050 | 0.0059 | 0.0000 | 0.0000 | 0.0000 | 0.0038 |
| OPCML_E219_R       | 0.0010 | 0.0063 | 0.0035 | 0.1117 | 0.0066 | 0.1395 | 0.0000 | 0.0045 | 0.0001 | 0.0051 | 0.0085 | 0.0038 |
| OPCML_P71_F        | 0.0083 | 0.0049 | 0.0000 | 0.2971 | 0.3891 | 0.0013 | 0.0095 | 0.0062 | 0.0022 | 0.0091 | 0.0063 | 0.0022 |
| OSM_P188_F         | 0.0113 | 0.0085 | 0.0109 | 0.0117 | 0.0176 | 0.0862 | 0.1048 | 0.0091 | 0.0113 | 0.0097 | 0.0136 | 0.0071 |
| p16_seq_47_S188_R  | 0.0057 | 0.0060 | 0.0043 | 0.0047 | 0.1874 | 0.0034 | 0.0075 | 0.0063 | 0.0036 | 0.0097 | 0.0125 | 0.0000 |
| P2RX7_E323_R       | 0.0431 | 0.0024 | 0.0036 | 0.2173 | 0.0071 | 0.0106 | 0.0019 | 0.0083 | 0.0037 | 0.0037 | 0.0048 | 0.0022 |
| P2RX7_P119_R       | 0.2153 | 0.2401 | 0.0173 | 0.2365 | 0.0346 | 0.0345 | 0.0161 | 0.0192 | 0.0185 | 0.0213 | 0.0379 | 0.0118 |
| P2RX7_P597_F       | 0.9898 | 0.3653 | 0.9207 | 0.9870 | 0.9898 | 0.9855 | 0.9947 | 0.9796 | 0.9924 | 0.8061 | 0.9216 | 0.9919 |
| PALM2-AKAP2_P183_R | 0.0256 | 0.0611 | 0.0273 | 0.0255 | 0.0291 | 0.0188 | 0.5818 | 0.0321 | 0.0303 | 0.0366 | 0.0514 | 0.5514 |
| PALM2-AKAP2_P420_R | 0.0000 | 0.0164 | 0.0000 | 0.1067 | 0.6042 | 0.0024 | 0.0000 | 0.0000 | 0.0311 | 0.0000 | 0.0259 | 0.0000 |
| PARP1_P610_R       | 0.4700 | 0.9312 | 0.9717 | 0.6959 | 0.5200 | 0.5257 | 0.4737 | 0.8244 | 0.3954 | 0.5192 | 0.7635 | 0.1985 |
| PAX6_P1121_F       | 0.0017 | 0.0000 | 0.0191 | 0.0056 | 0.0102 | 0.0069 | 0.0135 | 0.0129 | 0.0108 | 0.0101 | 0.0214 | 0.0159 |
| PAX6_P50_R         | 0.0000 | 0.0000 | 0.0016 | 0.0000 | 0.0068 | 0.1438 | 0.0000 | 0.0000 | 0.0000 | 0.0040 | 0.0017 | 0.0000 |
| PCDH1_E22_F        | 0.0063 | 0.0000 | 0.0115 | 0.0117 | 0.0146 | 0.0100 | 0.0000 | 0.0134 | 0.0024 | 0.0000 | 0.0886 | 0.3027 |
| PCGF4_P760_R       | 0.0123 | 0.0108 | 0.0095 | 0.2728 | 0.0171 | 0.0116 | 0.0394 | 0.0086 | 0.0111 | 0.0074 | 0.0172 | 0.0725 |
| PCGF4_P92_R        | 0.0485 | 0.0358 | 0.0108 | 0.0095 | 0.0084 | 0.0046 | 0.0244 | 0.0061 | 0.0122 | 0.0108 | 0.0096 | 0.0164 |
| PCTK1_E77_R        | 0.9942 | 0.9442 | 0.9418 | 0.7150 | 0.9486 | 0.6759 | 0.9980 | 0.9644 | 0.9933 | 0.9766 | 0.9944 | 0.8989 |
| PDE1B_E141_F       | 0.0115 | 0.0217 | 0.0112 | 0.0140 | 0.0121 | 0.0747 | 0.0152 | 0.0120 | 0.0097 | 0.0168 | 0.0223 | 0.3140 |
| PDE1B_P263_R       | 0.0109 | 0.0073 | 0.0061 | 0.1004 | 0.0087 | 0.0095 | 0.0062 | 0.0533 | 0.0013 | 0.0000 | 0.0166 | 0.0065 |
| PDGFA_P841_R       | 0.0000 | 0.0000 | 0.0000 | 0.0034 | 0.0050 | 0.0000 | 0.0081 | 0.0000 | 0.0008 | 0.0000 | 0.0068 | 0.0000 |
| PDGFRB_E195_R      | 0.0064 | 0.0089 | 0.0090 | 0.0082 | 0.0072 | 0.0046 | 0.0099 | 0.0078 | 0.0018 | 0.0075 | 0.0123 | 0.0061 |
| PDGFRB_P343_F      | 0.0034 | 0.0034 | 0.0000 | 0.0000 | 0.0033 | 0.0000 | 0.0056 | 0.0019 | 0.0000 | 0.0012 | 0.0016 | 0.0017 |
| PEG10_P978_R       | 0.6985 | 0.0000 | 0.7297 | 0.0374 | 0.6380 | 0.0186 | 0.0000 | 0.0124 | 0.0358 | 0.8514 | 0.0821 | 0.0000 |
| PENK_E26_F         | 0.0328 | 0.1867 | 0.3197 | 0.0907 | 0.0293 | 0.1844 | 0.0459 | 0.0342 | 0.0774 | 0.0257 | 0.2957 | 0.0370 |
| PENK_P447_R        | 0.0080 | 0.0808 | 0.0187 | 0.0049 | 0.0078 | 0.0033 | 0.2741 | 0.0056 | 0.0035 | 0.0082 | 0.0125 | 0.0073 |
| PGF_E33_F          | 0.0053 | 0.0136 | 0.0119 | 0.0131 | 0.0258 | 0.0344 | 0.0295 | 0.0179 | 0.0497 | 0.0192 | 0.0216 | 0.0085 |
| PHLDA2_P622_F      | 0.7440 | 0.0000 | 0.0016 | 0.0056 | 0.0033 | 0.1284 | 0.0084 | 0.0000 | 0.0018 | 0.0078 | 0.0000 | 0.0000 |
| PI3_P1394_R        | 0.0180 | 0.0192 | 0.9699 | 0.9627 | 0.0362 | 0.9455 | 0.4396 | 0.2967 | 0.3464 | 0.0462 | 0.9486 | 0.4685 |
| PITX2_E24_R        | 0.4689 | 0.0168 | 0.8399 | 0.0130 | 0.6490 | 0.0158 | 0.0136 | 0.0090 | 0.0170 | 0.0110 | 0.0109 | 0.0693 |
| PITX2_P183_R       | 0.0000 | 0.0000 | 0.0000 | 0.0000 | 0.0001 | 0.1027 | 0.0000 | 0.0000 | 0.0000 | 0.0017 | 0.0000 | 0.0000 |



|                |        |        |        |        |        |        |        |        |        |        |        |        |
|----------------|--------|--------|--------|--------|--------|--------|--------|--------|--------|--------|--------|--------|
| PKD2_P287_R    | 0.0109 | 0.0065 | 0.0109 | 0.0119 | 0.0126 | 0.0081 | 0.0000 | 0.0112 | 0.0110 | 0.1805 | 0.0255 | 0.0024 |
| PKD2_P336_R    | 0.0083 | 0.0091 | 0.0149 | 0.0983 | 0.0136 | 0.0665 | 0.0074 | 0.0093 | 0.0084 | 0.0096 | 0.0147 | 0.0057 |
| PLAU_P11_F     | 0.0266 | 0.3616 | 0.0312 | 0.0234 | 0.3174 | 0.1265 | 0.0177 | 0.0193 | 0.0191 | 0.0296 | 0.0300 | 0.2728 |
| PLAU_P176_R    | 0.0026 | 0.0000 | 0.0000 | 0.0027 | 0.0059 | 0.0000 | 0.0000 | 0.0000 | 0.0017 | 0.0000 | 0.0000 | 0.0000 |
| PLAUR_E123_F   | 0.0021 | 0.0000 | 0.0008 | 0.1847 | 0.0053 | 0.0661 | 0.0058 | 0.0036 | 0.0031 | 0.0038 | 0.0069 | 0.0024 |
| PLAUR_P82_F    | 0.0000 | 0.0032 | 0.0000 | 0.0015 | 0.0000 | 0.0000 | 0.0000 | 0.0000 | 0.0005 | 0.0034 | 0.0014 | 0.0014 |
| PLG_E406_F     | 0.9228 | 0.8817 | 0.8390 | 0.9425 | 0.6937 | 0.9894 | 0.9170 | 0.9519 | 0.9833 | 0.9494 | 0.8597 | 0.9953 |
| PLSCR3_P751_R  | 0.0090 | 0.0144 | 0.0117 | 0.2639 | 0.0203 | 0.2671 | 0.0209 | 0.0181 | 0.0077 | 0.5214 | 0.2407 | 0.0121 |
| PLXDC1_P236_F  | 0.0149 | 0.0000 | 0.0077 | 0.0096 | 0.0134 | 0.0100 | 0.0697 | 0.0093 | 0.0110 | 0.0143 | 0.0208 | 0.6695 |
| PLXDC2_E337_F  | 0.0016 | 0.0000 | 0.0034 | 0.1036 | 0.0113 | 0.0409 | 0.0130 | 0.0068 | 0.0011 | 0.0058 | 0.0067 | 0.0061 |
| PLXDC2_P914_R  | 0.0408 | 0.3804 | 0.0903 | 0.0275 | 0.0414 | 0.0284 | 0.3574 | 0.0209 | 0.0280 | 0.0301 | 0.0882 | 0.3783 |
| PMP22_P975_F   | 0.9178 | 0.0000 | 0.0000 | 0.9374 | 0.9844 | 0.9781 | 0.0000 | 0.0000 | 0.0000 | 0.0000 | 0.0000 | 0.0000 |
| PODXL_P1341_R  | 0.0060 | 0.0000 | 0.0083 | 0.0971 | 0.0082 | 0.0233 | 0.1880 | 0.0000 | 0.0051 | 0.0088 | 0.0109 | 0.0638 |
| POMC_E254_F    | 0.0122 | 0.0098 | 0.0096 | 0.0147 | 0.2741 | 0.0631 | 0.0000 | 0.0058 | 0.9870 | 0.7380 | 0.0123 | 0.0000 |
| POMC_P400_R    | 0.0000 | 0.0067 | 0.0047 | 0.0067 | 0.0163 | 0.3420 | 0.0000 | 0.0043 | 0.0000 | 0.0051 | 0.0049 | 0.0000 |
| POMC_P53_F     | 0.0198 | 0.0498 | 0.0059 | 0.0091 | 0.1942 | 0.0094 | 0.0000 | 0.0089 | 0.0074 | 0.0649 | 0.0146 | 0.1460 |
| PPARD_P846_F   | 0.0000 | 0.0000 | 0.0000 | 0.7909 | 0.0000 | 0.0000 | 0.0000 | 0.0053 | 0.0000 | 0.0000 | 0.0000 | 0.0000 |
| PPARG_E178_R   | 0.0051 | 0.0000 | 0.0051 | 0.0057 | 0.0046 | 0.0042 | 0.0336 | 0.0000 | 0.0000 | 0.0018 | 0.0024 | 0.0033 |
| PPP2R1B_P268_R | 0.0000 | 0.0000 | 0.0008 | 0.4512 | 0.0092 | 0.0006 | 0.8292 | 0.0060 | 0.0000 | 0.0059 | 0.0087 | 0.0000 |
| PRDM2_P1340_R  | 0.9633 | 0.0000 | 0.9778 | 0.9560 | 0.9843 | 0.9689 | 0.0000 | 0.9892 | 0.9861 | 0.9740 | 0.0756 | 0.9887 |
| PRKCDBP_E206_F | 0.0000 | 0.0000 | 0.0030 | 0.0000 | 0.0069 | 0.0015 | 0.0000 | 0.0045 | 0.0013 | 0.0057 | 0.0155 | 0.0000 |
| PROK2_E0_F     | 0.0000 | 0.0000 | 0.0019 | 0.0009 | 0.0071 | 0.1092 | 0.0000 | 0.0043 | 0.0000 | 0.0025 | 0.0072 | 0.0000 |
| PROK2_P390_F   | 0.0000 | 0.0000 | 0.0000 | 0.0000 | 0.0023 | 0.0000 | 0.0000 | 0.0010 | 0.0000 | 0.0020 | 0.0000 | 0.0000 |
| PRSS8_E134_R   | 0.9875 | 0.6316 | 0.9867 | 0.9857 | 0.9168 | 0.9846 | 0.0655 | 0.9890 | 0.9863 | 0.2095 | 0.6670 | 0.1539 |
| PSCA_E359_F    | 0.0000 | 0.0000 | 0.0025 | 0.1950 | 0.0157 | 0.2283 | 0.0054 | 0.0000 | 0.0000 | 0.0600 | 0.0102 | 0.0013 |
| PSIP1_P163_R   | 0.0000 | 0.0022 | 0.0000 | 0.0028 | 0.0055 | 0.1574 | 0.0081 | 0.0109 | 0.0025 | 0.0095 | 0.0076 | 0.0067 |
| PTCH_E42_F     | 0.0016 | 0.0000 | 0.0075 | 0.0110 | 0.0116 | 0.0091 | 0.0081 | 0.0216 | 0.0126 | 0.0112 | 0.0118 | 0.0039 |
| PTCH2_P568_R   | 0.0068 | 0.5184 | 0.8829 | 0.3014 | 0.7090 | 0.2260 | 0.0121 | 0.0095 | 0.0467 | 0.0097 | 0.4141 | 0.0325 |
| PTEN_P438_F    | 0.0041 | 0.0000 | 0.0073 | 0.0064 | 0.0102 | 0.0027 | 0.1741 | 0.0069 | 0.0067 | 0.0075 | 0.0084 | 0.0000 |
| PTGS1_P2_F     | 0.0082 | 0.0000 | 0.0053 | 0.0101 | 0.0000 | 0.0054 | 0.0190 | 0.0134 | 0.0052 | 0.0123 | 0.0094 | 0.0029 |
| PTGS2_P308_F   | 0.0056 | 0.0107 | 0.0030 | 0.0060 | 0.0035 | 0.0025 | 0.1328 | 0.0045 | 0.0020 | 0.0047 | 0.0055 | 0.0048 |
| PTGS2_P524_R   | 0.0043 | 0.0000 | 0.0086 | 0.0496 | 0.0109 | 0.0061 | 0.0129 | 0.0091 | 0.0036 | 0.0057 | 0.0121 | 0.0051 |
| PTHLH_P15_R    | 0.0000 | 0.0041 | 0.0000 | 0.0012 | 0.0000 | 0.4256 | 0.0000 | 0.0000 | 0.0000 | 0.0000 | 0.0001 | 0.0016 |

|                   |        |        |        |        |        |        |        |        |        |        |        |        |
|-------------------|--------|--------|--------|--------|--------|--------|--------|--------|--------|--------|--------|--------|
| PTHR1_P170_R      | 0.9743 | 0.6961 | 0.0000 | 0.9832 | 0.8959 | 0.8831 | 0.9917 | 0.0108 | 0.0052 | 0.0000 | 0.7122 | 0.0000 |
| PTK2_P735_R       | 0.0084 | 0.0077 | 0.1588 | 0.0116 | 0.0139 | 0.0081 | 0.0084 | 0.0118 | 0.2682 | 0.0114 | 0.0198 | 0.0037 |
| PTK2B_P673_R      | 0.0111 | 0.0002 | 0.0030 | 0.0048 | 0.0182 | 0.0036 | 0.0000 | 0.0056 | 0.0002 | 0.0000 | 0.0088 | 0.0000 |
| PTPN6_E171_R      | 0.0000 | 0.0000 | 0.0000 | 0.0000 | 0.0009 | 0.0000 | 0.0000 | 0.0000 | 0.0000 | 0.0000 | 0.0000 | 0.0000 |
| PTPN6_P282_R      | 0.0000 | 0.0000 | 0.0000 | 0.4304 | 0.0000 | 0.2526 | 0.0000 | 0.0000 | 0.0000 | 0.0000 | 0.9807 | 0.0000 |
| PTPNS1_E433_R     | 0.0000 | 0.0000 | 0.0000 | 0.0000 | 0.0008 | 0.0000 | 0.0000 | 0.0000 | 0.0000 | 0.0000 | 0.0000 | 0.0000 |
| PTPNS1_P301_R     | 0.0091 | 0.0000 | 0.0070 | 0.0095 | 0.0095 | 0.0072 | 0.0000 | 0.0097 | 0.0013 | 0.0076 | 0.0000 | 0.0000 |
| PTPRF_E178_R      | 0.0000 | 0.0000 | 0.0030 | 0.0057 | 0.0063 | 0.2216 | 0.0000 | 0.5770 | 0.6739 | 0.0071 | 0.7506 | 0.0000 |
| PTPRG_E40_R       | 0.0064 | 0.5054 | 0.0222 | 0.0096 | 0.3515 | 0.0074 | 0.2464 | 0.3515 | 0.2673 | 0.4148 | 0.0222 | 0.1666 |
| PTPRG_P476_F      | 0.0053 | 0.0000 | 0.0058 | 0.0066 | 0.0132 | 0.0035 | 0.1146 | 0.0056 | 0.0067 | 0.0057 | 0.0053 | 0.0000 |
| PTPRO_E56_F       | 0.0007 | 0.0010 | 0.0016 | 0.0000 | 0.0017 | 0.0000 | 0.0065 | 0.0000 | 0.0000 | 0.0045 | 0.0000 | 0.0042 |
| PURA_P928_R       | 0.0000 | 0.0000 | 0.0012 | 0.0029 | 0.0000 | 0.0000 | 0.0000 | 0.0000 | 0.0000 | 0.0052 | 0.0010 | 0.0030 |
| PWCR1_P811_F      | 0.3487 | 0.5643 | 0.9849 | 0.9774 | 0.0000 | 0.9759 | 0.0000 | 0.7197 | 0.7549 | 0.9820 | 0.9868 | 0.9888 |
| PYCARD_E87_F      | 0.0191 | 0.1377 | 0.0107 | 0.0145 | 0.0101 | 0.0140 | 0.0645 | 0.0173 | 0.0135 | 0.0690 | 0.0259 | 0.0607 |
| PYCARD_P150_F     | 0.0111 | 0.8167 | 0.0126 | 0.3971 | 0.4825 | 0.5193 | 0.0158 | 0.0066 | 0.0177 | 0.0134 | 0.0150 | 0.0171 |
| RAB32_E314_R      | 0.0000 | 0.0052 | 0.0045 | 0.0955 | 0.0000 | 0.0216 | 0.0000 | 0.0060 | 0.0020 | 0.0059 | 0.0088 | 0.0049 |
| RAB32_P493_R      | 0.0000 | 0.0000 | 0.0000 | 0.1280 | 0.0033 | 0.1677 | 0.0000 | 0.0000 | 0.0000 | 0.0000 | 0.0000 | 0.0000 |
| RAF1_P330_F       | 0.0000 | 0.9873 | 0.0017 | 0.0010 | 0.0052 | 0.0000 | 0.0027 | 0.0004 | 0.0000 | 0.0017 | 0.0323 | 0.0004 |
| RAN_P581_R        | 0.0008 | 0.0000 | 0.1767 | 0.5429 | 0.0000 | 0.6439 | 0.0019 | 0.0037 | 0.0000 | 0.0049 | 0.0054 | 0.7766 |
| RARA_E128_R       | 0.5246 | 0.0055 | 0.0057 | 0.2386 | 0.0082 | 0.0841 | 0.0090 | 0.0060 | 0.0032 | 0.0047 | 0.0106 | 0.0020 |
| RARA_P176_R       | 0.0025 | 0.0000 | 0.0013 | 0.2714 | 0.0000 | 0.6898 | 0.0000 | 0.0000 | 0.0000 | 0.0000 | 0.0000 | 0.0000 |
| RARB_E114_F       | 0.0039 | 0.0031 | 0.0016 | 0.0042 | 0.0056 | 0.0119 | 0.0000 | 0.0039 | 0.0000 | 0.0059 | 0.0110 | 0.0038 |
| RARB_P60_F        | 0.0098 | 0.0000 | 0.0000 | 0.0036 | 0.0036 | 0.0000 | 0.0000 | 0.0014 | 0.0000 | 0.0010 | 0.0120 | 0.0000 |
| RARRES1_E235_F    | 0.0087 | 0.0171 | 0.0066 | 0.0593 | 0.0112 | 0.0074 | 0.0621 | 0.0108 | 0.0053 | 0.0113 | 0.0111 | 0.1092 |
| RASGRF1_E16_F     | 0.0043 | 0.0030 | 0.0075 | 0.0074 | 0.0067 | 0.0049 | 0.0000 | 0.0050 | 0.0060 | 0.0117 | 0.0089 | 0.0003 |
| RASGRF1_P768_F    | 0.0071 | 0.4108 | 0.0047 | 0.0037 | 0.1019 | 0.0022 | 0.4393 | 0.0066 | 0.0039 | 0.0000 | 0.0096 | 0.0846 |
| RASSF1_E116_F     | 0.0000 | 0.0036 | 0.0054 | 0.0070 | 0.0004 | 0.0670 | 0.0000 | 0.0019 | 0.0693 | 0.0093 | 0.0100 | 0.0080 |
| RASSF1_P244_F     | 0.0133 | 0.0063 | 0.0416 | 0.0073 | 0.0533 | 0.0050 | 0.3837 | 0.0059 | 0.0052 | 0.0143 | 0.0112 | 0.0058 |
| RBL2_P250_R       | 0.0310 | 0.0000 | 0.0072 | 0.0024 | 0.0101 | 0.1224 | 0.0000 | 0.0072 | 0.0126 | 0.0043 | 0.0093 | 0.0053 |
| RBP1_E158_F       | 0.0005 | 0.0000 | 0.0000 | 0.1281 | 0.0000 | 0.0844 | 0.0000 | 0.0000 | 0.0000 | 0.0000 | 0.0039 | 0.0019 |
| RBP1_P150_F       | 0.0000 | 0.0000 | 0.1827 | 0.0000 | 0.0000 | 0.0000 | 0.0000 | 0.0000 | 0.0000 | 0.0000 | 0.0000 | 0.0000 |
| RET_P717_F        | 0.0048 | 0.0040 | 0.0097 | 0.0088 | 0.0100 | 0.0043 | 0.0101 | 0.0138 | 0.0000 | 0.0109 | 0.0123 | 0.0046 |
| RET_seq_53_S374_F | 0.3879 | 0.0034 | 0.2282 | 0.0080 | 0.0053 | 0.0065 | 0.1354 | 0.0000 | 0.1239 | 0.1104 | 0.0089 | 0.0048 |

|                 |        |        |        |        |        |        |        |        |        |        |        |        |
|-----------------|--------|--------|--------|--------|--------|--------|--------|--------|--------|--------|--------|--------|
| RHOC_P536_F     | 0.0000 | 0.0042 | 0.0001 | 0.0008 | 0.0000 | 0.0000 | 0.0000 | 0.0000 | 0.0000 | 0.0000 | 0.0000 | 0.0000 |
| RHOH_P121_F     | 0.0000 | 0.0000 | 0.0000 | 0.0000 | 0.0000 | 0.0000 | 0.0000 | 0.0000 | 0.0000 | 0.0000 | 0.0000 | 0.0000 |
| RHOH_P953_R     | 0.9799 | 0.9899 | 0.0000 | 0.8809 | 0.0000 | 0.9689 | 0.0000 | 0.0000 | 0.0000 | 0.9880 | 0.0000 | 0.0000 |
| RIPK1_P868_F    | 0.0306 | 0.7979 | 0.9845 | 0.9746 | 0.4398 | 0.9747 | 0.9937 | 0.4411 | 0.9304 | 0.9845 | 0.9816 | 0.4541 |
| RIPK2_E123_F    | 0.0033 | 0.0000 | 0.0040 | 0.0055 | 0.0087 | 0.0904 | 0.0066 | 0.0053 | 0.0007 | 0.0093 | 0.0521 | 0.0000 |
| RIPK3_P124_F    | 0.0077 | 0.0066 | 0.3376 | 0.0088 | 0.0127 | 0.0069 | 0.0075 | 0.0098 | 0.4639 | 0.1037 | 0.5060 | 0.2055 |
| RIPK3_P24_F     | 0.0000 | 0.0000 | 0.0000 | 0.0000 | 0.0034 | 0.0000 | 0.0000 | 0.0000 | 0.0000 | 0.0010 | 0.0000 | 0.0000 |
| RIPK4_E166_F    | 0.0005 | 0.0000 | 0.0019 | 0.0000 | 0.0003 | 0.0599 | 0.0000 | 0.0000 | 0.0000 | 0.0000 | 0.0047 | 0.0000 |
| RIPK4_P172_F    | 0.0040 | 0.0947 | 0.0072 | 0.0807 | 0.0116 | 0.0502 | 0.0129 | 0.0078 | 0.0034 | 0.0097 | 0.0094 | 0.2819 |
| ROR1_P6_F       | 0.0000 | 0.0038 | 0.0057 | 0.0002 | 0.0000 | 0.0000 | 0.0000 | 0.0047 | 0.0000 | 0.0008 | 0.0118 | 0.0000 |
| ROR2_P317_R     | 0.0000 | 0.0000 | 0.0002 | 0.0016 | 0.0031 | 0.0336 | 0.0000 | 0.0000 | 0.0000 | 0.0000 | 0.0000 | 0.0000 |
| RRAS_P100_R     | 0.0000 | 0.0000 | 0.0000 | 0.0000 | 0.0005 | 0.0000 | 0.0000 | 0.0000 | 0.0000 | 0.0000 | 0.0000 | 0.0000 |
| RUNX3_P247_F    | 0.9161 | 0.0000 | 0.9403 | 0.6537 | 0.8772 | 0.8050 | 0.7174 | 0.8208 | 0.0016 | 0.8156 | 0.9739 | 0.0000 |
| RYK_P493_F      | 0.0000 | 0.0000 | 0.0383 | 0.0000 | 0.0464 | 0.0000 | 0.0019 | 0.0000 | 0.0000 | 0.0000 | 0.0000 | 0.0000 |
| S100A2_E36_R    | 0.0011 | 0.0000 | 0.4085 | 0.2113 | 0.0004 | 0.4121 | 0.0000 | 0.0103 | 0.0303 | 0.0097 | 0.9766 | 0.0071 |
| S100A4_E315_F   | 0.0079 | 0.0158 | 0.0115 | 0.0104 | 0.0104 | 0.0795 | 0.0145 | 0.0099 | 0.0042 | 0.0098 | 0.0237 | 0.1780 |
| SCGB3A1_E55_R   | 0.0000 | 0.0000 | 0.0000 | 0.0048 | 0.0000 | 0.0000 | 0.0000 | 0.0000 | 0.0000 | 0.0000 | 0.0000 | 0.0000 |
| SCGB3A1_P103_R  | 0.0000 | 0.0000 | 0.0000 | 0.0000 | 0.0000 | 0.0000 | 0.0000 | 0.0000 | 0.0000 | 0.0000 | 0.0000 | 0.0000 |
| SEMA3A_P343_F   | 0.0000 | 0.0000 | 0.0000 | 0.0000 | 0.0000 | 0.2968 | 0.0037 | 0.0000 | 0.0000 | 0.0000 | 0.0041 | 0.0000 |
| SEMA3A_P658_R   | 0.1010 | 0.0303 | 0.6663 | 0.2793 | 0.0582 | 0.3594 | 0.0828 | 0.0398 | 0.0443 | 0.0274 | 0.0376 | 0.0118 |
| SEMA3C_E49_R    | 0.0145 | 0.0258 | 0.0094 | 0.0149 | 0.0154 | 0.0157 | 0.0417 | 0.4181 | 0.0110 | 0.0175 | 0.0175 | 0.1025 |
| SEMA3C_P642_F   | 0.2230 | 0.0000 | 0.2068 | 0.5968 | 0.1554 | 0.0552 | 0.2420 | 0.0094 | 0.0259 | 0.0173 | 0.0172 | 0.2200 |
| SEMA3F_E333_R   | 0.0026 | 0.0097 | 0.0029 | 0.0069 | 0.0000 | 0.1506 | 0.0000 | 0.0000 | 0.0000 | 0.0018 | 0.0155 | 0.1973 |
| SEMA3F_P692_R   | 0.0017 | 0.0016 | 0.6848 | 0.0044 | 0.0000 | 0.0012 | 0.0000 | 0.0021 | 0.8989 | 0.0047 | 0.0054 | 0.0000 |
| SEPT5_P441_F    | 0.9835 | 0.9891 | 0.0120 | 0.4129 | 0.0075 | 0.4051 | 0.0073 | 0.0642 | 0.1106 | 0.0277 | 0.0113 | 0.0030 |
| SEPT9_P58_R     | 0.0113 | 0.0096 | 0.0237 | 0.6258 | 0.5369 | 0.8306 | 0.1298 | 0.9878 | 0.9849 | 0.9887 | 0.0359 | 0.0146 |
| SERPINA5_E69_F  | 0.9829 | 0.9850 | 0.9597 | 0.5388 | 0.7163 | 0.7637 | 0.9944 | 0.1081 | 0.0086 | 0.9764 | 0.5011 | 0.9895 |
| SERPINB2_P939_F | 0.9847 | 0.9939 | 0.9746 | 0.9713 | 0.0000 | 0.9799 | 0.0000 | 0.9882 | 0.9887 | 0.9881 | 0.9865 | 0.9886 |
| SERPINE1_E189_R | 0.2775 | 0.0127 | 0.0071 | 0.2793 | 0.0129 | 0.2065 | 0.0124 | 0.0129 | 0.0082 | 0.0176 | 0.3681 | 0.0086 |
| SEZ6L_P249_F    | 0.0065 | 0.2965 | 0.0021 | 0.0036 | 0.0101 | 0.0670 | 0.0092 | 0.0051 | 0.0012 | 0.0043 | 0.0078 | 0.0035 |
| SEZ6L_P299_F    | 0.0000 | 0.0000 | 0.0054 | 0.0021 | 0.0036 | 0.0023 | 0.0069 | 0.0000 | 0.0008 | 0.0079 | 0.0108 | 0.0000 |
| SFN_E118_F      | 0.9888 | 0.8697 | 0.5816 | 0.9348 | 0.8004 | 0.9710 | 0.9901 | 0.9915 | 0.9710 | 0.6033 | 0.9888 | 0.0198 |
| SFRP1_E398_R    | 0.0000 | 0.0030 | 0.5183 | 0.0031 | 0.0033 | 0.0024 | 0.0000 | 0.0033 | 0.0000 | 0.0000 | 0.0064 | 0.0000 |

|                      |        |        |        |        |        |        |        |        |        |        |        |        |
|----------------------|--------|--------|--------|--------|--------|--------|--------|--------|--------|--------|--------|--------|
| SFRP1_P157_F         | 0.0044 | 0.0047 | 0.0042 | 0.0032 | 0.0095 | 0.0024 | 0.0000 | 0.0048 | 0.0015 | 0.9758 | 0.0053 | 0.0029 |
| SFTPA1_E340_R        | 0.0000 | 0.9870 | 0.9794 | 0.9822 | 0.9044 | 0.9788 | 0.0000 | 0.9841 | 0.9852 | 0.9891 | 0.9872 | 0.9887 |
| SH3BP2_P771_R        | 0.0037 | 0.0000 | 0.8487 | 0.0977 | 0.0030 | 0.1307 | 0.0000 | 0.0000 | 0.0000 | 0.0000 | 0.0118 | 0.0000 |
| SHB_P473_R           | 0.0056 | 0.0000 | 0.0033 | 0.0039 | 0.0080 | 0.0025 | 0.1727 | 0.0000 | 0.0000 | 0.0039 | 0.0045 | 0.0019 |
| SHB_P691_R           | 0.0107 | 0.0119 | 0.0122 | 0.0117 | 0.0202 | 0.0118 | 0.3474 | 0.0102 | 0.0258 | 0.0186 | 0.0210 | 0.4037 |
| SHH_E328_F           | 0.0000 | 0.0000 | 0.0000 | 0.0000 | 0.0000 | 0.0000 | 0.0000 | 0.0000 | 0.0000 | 0.9595 | 0.0000 | 0.0000 |
| SHH_P104_R           | 0.0000 | 0.0050 | 0.0064 | 0.0099 | 0.0177 | 0.0068 | 0.0000 | 0.0000 | 0.4746 | 0.0272 | 0.4305 | 0.0080 |
| SIN3B_P514_R         | 0.9462 | 0.9847 | 0.9419 | 0.9682 | 0.9816 | 0.9622 | 0.9912 | 0.9641 | 0.9777 | 0.9847 | 0.8955 | 0.6387 |
| SKI_E465_R           | 0.0047 | 0.0074 | 0.0040 | 0.0078 | 0.0000 | 0.0065 | 0.0000 | 0.0072 | 0.0026 | 0.0044 | 0.0080 | 0.0029 |
| SLC22A2_E271_R       | 0.8782 | 0.9882 | 0.9815 | 0.9815 | 0.9872 | 0.9846 | 0.0128 | 0.9911 | 0.9855 | 0.3544 | 0.9540 | 0.9932 |
| SLC22A3_P634_F       | 0.6697 | 0.0316 | 0.2312 | 0.3566 | 0.4646 | 0.2465 | 0.0000 | 0.0175 | 0.0243 | 0.9866 | 0.9275 | 0.3346 |
| SLC6A8_seq_28_S227_F | 0.0000 | 0.0000 | 0.0000 | 0.6142 | 0.0000 | 0.6864 | 0.0000 | 0.0000 | 0.0000 | 0.0052 | 0.0016 | 0.9892 |
| SLIT2_P208_F         | 0.0089 | 0.0132 | 0.1506 | 0.0084 | 0.1084 | 0.0084 | 0.2288 | 0.0077 | 0.0054 | 0.0053 | 0.0110 | 0.0044 |
| SMAD2_P708_R         | 0.0000 | 0.0000 | 0.0000 | 0.0033 | 0.0077 | 0.0000 | 0.0000 | 0.0027 | 0.0004 | 0.0031 | 0.0040 | 0.0054 |
| SMAD2_P848_R         | 0.0000 | 0.0000 | 0.0000 | 0.0021 | 0.0000 | 0.2762 | 0.0000 | 0.0015 | 0.0000 | 0.0067 | 0.0000 | 0.0025 |
| SMAD4_P474_R         | 0.0000 | 0.0000 | 0.0000 | 0.1750 | 0.0000 | 0.0000 | 0.0000 | 0.0000 | 0.0000 | 0.0021 | 0.0030 | 0.0006 |
| SMARCA3_E20_F        | 0.0000 | 0.0019 | 0.0012 | 0.1274 | 0.6165 | 0.0012 | 0.0000 | 0.0000 | 0.0000 | 0.0088 | 0.0056 | 0.0000 |
| SMARCA3_P109_R       | 0.0143 | 0.0057 | 0.0080 | 0.2807 | 0.0164 | 0.0189 | 0.2319 | 0.0155 | 0.0131 | 0.0133 | 0.0149 | 0.0000 |
| SMARCA3_P17_R        | 0.0000 | 0.0000 | 0.0020 | 0.0054 | 0.0107 | 0.0071 | 0.0060 | 0.0000 | 0.0000 | 0.0000 | 0.0001 | 0.0000 |
| SMARCA4_P362_R       | 0.0054 | 0.0061 | 0.0050 | 0.0063 | 0.0079 | 0.0058 | 0.0070 | 0.0045 | 0.0041 | 0.0081 | 0.0222 | 0.0062 |
| SMO_E57_F            | 0.0026 | 0.0000 | 0.0000 | 0.0080 | 0.0031 | 0.0000 | 0.0000 | 0.0138 | 0.0000 | 0.0068 | 0.0225 | 0.0000 |
| SOD3_P225_F          | 0.9850 | 0.0617 | 0.1073 | 0.9738 | 0.9847 | 0.9703 | 0.2030 | 0.0000 | 0.0044 | 0.0536 | 0.9878 | 0.1839 |
| SOX1_P1018_R         | 0.1487 | 0.0124 | 0.0557 | 0.0045 | 0.0062 | 0.0055 | 0.0010 | 0.0000 | 0.0000 | 0.0000 | 0.0020 | 0.0000 |
| SOX1_P294_F          | 0.0140 | 0.9888 | 0.0120 | 0.2571 | 0.0249 | 0.1052 | 0.0095 | 0.0160 | 0.0128 | 0.0176 | 0.0218 | 0.4060 |
| SOX17_P287_R         | 0.0000 | 0.0000 | 0.0000 | 0.0000 | 0.0000 | 0.0709 | 0.0000 | 0.0000 | 0.0000 | 0.0005 | 0.8197 | 0.0000 |
| SOX17_P303_F         | 0.0987 | 0.1973 | 0.1281 | 0.0891 | 0.6944 | 0.1175 | 0.8211 | 0.0901 | 0.1263 | 0.8691 | 0.1192 | 0.1514 |
| SOX2_P546_F          | 0.0084 | 0.0000 | 0.0070 | 0.1599 | 0.0086 | 0.0082 | 0.0216 | 0.0097 | 0.0080 | 0.0082 | 0.0136 | 0.0000 |
| SPARC_E50_R          | 0.0083 | 0.0070 | 0.3602 | 0.1345 | 0.0133 | 0.1582 | 0.0118 | 0.0078 | 0.2534 | 0.0115 | 0.0150 | 0.0000 |
| SPARC_P195_F         | 0.0019 | 0.0000 | 0.0055 | 0.3214 | 0.0064 | 0.0376 | 0.0116 | 0.0061 | 0.0016 | 0.7777 | 0.0103 | 0.0030 |
| SPDEF_E116_R         | 0.3853 | 0.2759 | 0.0205 | 0.0288 | 0.0247 | 0.0562 | 0.0135 | 0.4884 | 0.1433 | 0.0699 | 0.2332 | 0.1742 |
| SPI1_E205_F          | 0.9845 | 0.7588 | 0.0200 | 0.0192 | 0.0190 | 0.3510 | 0.7731 | 0.0456 | 0.0115 | 0.0268 | 0.0236 | 0.0106 |
| SPP1_E140_R          | 0.0000 | 0.4135 | 0.6456 | 0.1484 | 0.0037 | 0.0015 | 0.0146 | 0.0078 | 0.0018 | 0.0066 | 0.0073 | 0.0000 |
| SRC_P297_F           | 0.9858 | 0.9918 | 0.9860 | 0.9770 | 0.9432 | 0.9805 | 0.9937 | 0.9887 | 0.9904 | 0.9887 | 0.9811 | 0.0086 |

|                |        |        |        |        |        |        |        |        |        |        |        |        |
|----------------|--------|--------|--------|--------|--------|--------|--------|--------|--------|--------|--------|--------|
| ST6GAL1_P164_R | 0.0153 | 0.0126 | 0.0077 | 0.0659 | 0.1645 | 0.0124 | 0.0000 | 0.0272 | 0.1078 | 0.0000 | 0.0439 | 0.0000 |
| ST6GAL1_P528_F | 0.0022 | 0.0000 | 0.0020 | 0.4608 | 0.0110 | 0.1430 | 0.0052 | 0.0005 | 0.0020 | 0.0072 | 0.0109 | 0.0000 |
| STK23_E182_R   | 0.0107 | 0.0000 | 0.0000 | 0.9020 | 0.0172 | 0.9791 | 0.0166 | 0.0003 | 0.0000 | 0.0110 | 0.0057 | 0.0000 |
| SYK_E372_F     | 0.0300 | 0.0153 | 0.0114 | 0.0162 | 0.0161 | 0.0085 | 0.2150 | 0.0115 | 0.0129 | 0.0149 | 0.0277 | 0.0059 |
| TAL1_E122_F    | 0.0099 | 0.0143 | 0.0242 | 0.0087 | 0.0080 | 0.0042 | 0.0131 | 0.0102 | 0.0098 | 0.0115 | 0.0139 | 0.2278 |
| TAL1_P594_F    | 0.0000 | 0.0000 | 0.0000 | 0.0060 | 0.0068 | 0.0016 | 0.1995 | 0.0019 | 0.0000 | 0.0073 | 0.0056 | 0.0032 |
| TAL1_P817_F    | 0.0000 | 0.0000 | 0.0000 | 0.0000 | 0.9241 | 0.7875 | 0.0000 | 0.0000 | 0.0000 | 0.9753 | 0.0000 | 0.0000 |
| TCF4_P175_R    | 0.0000 | 0.0000 | 0.0000 | 0.0000 | 0.0000 | 0.0000 | 0.0000 | 0.0000 | 0.0000 | 0.0000 | 0.0037 | 0.0016 |
| TCF7L2_E411_F  | 0.0013 | 0.0016 | 0.0000 | 0.1186 | 0.0019 | 0.0000 | 0.0011 | 0.0035 | 0.0000 | 0.0006 | 0.0097 | 0.0020 |
| TCF7L2_P193_R  | 0.0098 | 0.0000 | 0.0000 | 0.0029 | 0.0066 | 0.0025 | 0.0091 | 0.0000 | 0.0000 | 0.0080 | 0.0072 | 0.0047 |
| TERT_E20_F     | 0.0086 | 0.0107 | 0.0072 | 0.0869 | 0.0133 | 0.0333 | 0.0111 | 0.0110 | 0.0049 | 0.0099 | 0.0163 | 0.0074 |
| TERT_P360_R    | 0.0210 | 0.3833 | 0.0103 | 0.1271 | 0.0169 | 0.0168 | 0.0220 | 0.0165 | 0.8366 | 0.0171 | 0.0119 | 0.0112 |
| TES_E172_F     | 0.0002 | 0.0024 | 0.9274 | 0.0068 | 0.0039 | 0.0003 | 0.0090 | 0.0053 | 0.0034 | 0.0075 | 0.0086 | 0.2023 |
| TESK2_P252_R   | 0.0079 | 0.0072 | 0.0045 | 0.0064 | 0.0113 | 0.0067 | 0.0068 | 0.0503 | 0.0044 | 0.0333 | 0.0079 | 0.0372 |
| TFAP2C_E260_F  | 0.0018 | 0.0000 | 0.0006 | 0.0012 | 0.0135 | 0.0000 | 0.0000 | 0.0046 | 0.0000 | 0.0000 | 0.0066 | 0.0000 |
| TFAP2C_P765_F  | 0.0046 | 0.0000 | 0.0000 | 0.0095 | 0.0081 | 0.0061 | 0.0067 | 0.0000 | 0.0042 | 0.0104 | 0.0251 | 0.0056 |
| TFF2_P178_F    | 0.9846 | 0.8755 | 0.9817 | 0.9628 | 0.6350 | 0.9643 | 0.8457 | 0.9533 | 0.9900 | 0.8758 | 0.1391 | 0.8083 |
| TFF2_P557_R    | 0.9680 | 0.3525 | 0.9516 | 0.9856 | 0.9897 | 0.9784 | 0.9950 | 0.9898 | 0.9537 | 0.9815 | 0.8036 | 0.0000 |
| TFPI2_E141_F   | 0.0000 | 0.0000 | 0.0000 | 0.0000 | 0.0000 | 0.0000 | 0.0040 | 0.0024 | 0.0000 | 0.0013 | 0.0000 | 0.0000 |
| TFPI2_P152_R   | 0.0108 | 0.2583 | 0.0153 | 0.2409 | 0.0182 | 0.0157 | 0.1065 | 0.0071 | 0.3900 | 0.0136 | 0.0335 | 0.2232 |
| TFPI2_P9_F     | 0.0147 | 0.6350 | 0.0160 | 0.0144 | 0.0153 | 0.0107 | 0.0171 | 0.0121 | 0.0095 | 0.0176 | 0.0156 | 0.5080 |
| TFRC_P414_R    | 0.0000 | 0.0032 | 0.2151 | 0.0103 | 0.0000 | 0.0082 | 0.6038 | 0.0000 | 0.0147 | 0.0244 | 0.1910 | 0.0012 |
| TGFA_P558_F    | 0.0083 | 0.0000 | 0.0143 | 0.0106 | 0.0092 | 0.0076 | 0.0070 | 0.0087 | 0.3623 | 0.0114 | 0.0135 | 0.0095 |
| TGFA_P642_R    | 0.0032 | 0.0000 | 0.0064 | 0.0044 | 0.0067 | 0.0034 | 0.0070 | 0.0000 | 0.0022 | 0.0000 | 0.0091 | 0.0000 |
| TGFB1_P833_R   | 0.9844 | 0.0000 | 0.9836 | 0.9562 | 0.7459 | 0.9786 | 0.0060 | 0.9833 | 0.0000 | 0.0000 | 0.0061 | 0.7518 |
| TGFB2_E226_R   | 0.0000 | 0.0000 | 0.0000 | 0.0000 | 0.0000 | 0.0000 | 0.0000 | 0.0000 | 0.0000 | 0.0000 | 0.0009 | 0.0021 |
| TGFB2_P632_F   | 0.0124 | 0.0000 | 0.0099 | 0.0151 | 0.0223 | 0.0110 | 0.2142 | 0.0134 | 0.0162 | 0.0103 | 0.0211 | 0.1670 |
| TGFB3_E58_R    | 0.4871 | 0.0000 | 0.7791 | 0.9719 | 0.0000 | 0.9846 | 0.0000 | 0.8580 | 0.9854 | 0.9887 | 0.6392 | 0.0044 |
| TGFBI_P173_F   | 0.0132 | 0.3385 | 0.1517 | 0.0154 | 0.0867 | 0.2345 | 0.0000 | 0.0456 | 0.0061 | 0.0609 | 0.0620 | 0.1443 |
| TGFBI_P31_R    | 0.0069 | 0.0048 | 0.4143 | 0.1386 | 0.0100 | 0.1555 | 0.0109 | 0.0065 | 0.0034 | 0.5588 | 0.0983 | 0.0000 |
| TGFBR3_E188_R  | 0.0001 | 0.0000 | 0.0140 | 0.0043 | 0.0099 | 0.0017 | 0.0072 | 0.0047 | 0.0000 | 0.0029 | 0.0056 | 0.0000 |
| TGFBR3_P429_F  | 0.0016 | 0.0000 | 0.0008 | 0.0011 | 0.0040 | 0.0000 | 0.0023 | 0.0000 | 0.0000 | 0.0010 | 0.0000 | 0.0000 |
| THBS1_E207_R   | 0.0063 | 0.0000 | 0.0040 | 0.0048 | 0.0039 | 0.0025 | 0.0084 | 0.0033 | 0.0038 | 0.0000 | 0.0067 | 0.0389 |

|                   |        |        |        |        |        |        |        |        |        |        |        |        |
|-------------------|--------|--------|--------|--------|--------|--------|--------|--------|--------|--------|--------|--------|
| THBS1_P500_F      | 0.0167 | 0.0126 | 0.0438 | 0.1219 | 0.0202 | 0.0102 | 0.0057 | 0.0171 | 0.0131 | 0.0119 | 0.5076 | 0.0075 |
| THBS2_E129_F      | 0.0105 | 0.0051 | 0.0009 | 0.0036 | 0.0042 | 0.0035 | 0.0000 | 0.0043 | 0.0016 | 0.0119 | 0.0092 | 0.0000 |
| THY1_P149_R       | 0.0269 | 0.1689 | 0.1585 | 0.2342 | 0.0173 | 0.0236 | 0.0250 | 0.0190 | 0.0820 | 0.0169 | 0.0249 | 0.3021 |
| TIAM1_P188_R      | 0.0000 | 0.0000 | 0.0000 | 0.0019 | 0.0047 | 0.1517 | 0.0000 | 0.0000 | 0.0000 | 0.0018 | 0.0003 | 0.9910 |
| TIMP1_E254_R      | 0.0094 | 0.0602 | 0.0531 | 0.5520 | 0.0236 | 0.1967 | 0.0403 | 0.0267 | 0.0132 | 0.0082 | 0.0081 | 0.0693 |
| TIMP1_P615_R      | 0.0000 | 0.0000 | 0.0000 | 0.9598 | 0.9780 | 0.9001 | 0.0000 | 0.0000 | 0.0000 | 0.0000 | 0.9731 | 0.0000 |
| TIMP2_E394_R      | 0.0000 | 0.0000 | 0.0050 | 0.0072 | 0.0133 | 0.0045 | 0.0077 | 0.0050 | 0.0000 | 0.0063 | 0.0000 | 0.0909 |
| TIMP2_P267_F      | 0.8816 | 0.0029 | 0.2147 | 0.0012 | 0.0014 | 0.0005 | 0.0084 | 0.0046 | 0.0000 | 0.0031 | 0.4022 | 0.0015 |
| TIMP3_P1114_R     | 0.9901 | 0.9900 | 0.9888 | 0.9607 | 0.2223 | 0.9845 | 0.9943 | 0.9938 | 0.9902 | 0.9838 | 0.9731 | 0.9923 |
| TIMP3_P690_R      | 0.9549 | 0.9898 | 0.9883 | 0.9879 | 0.9871 | 0.9887 | 0.0000 | 0.9692 | 0.9910 | 0.9645 | 0.9908 | 0.0000 |
| TIMP3_seq_7_S38_F | 0.0048 | 0.0586 | 0.0073 | 0.0073 | 0.0116 | 0.0043 | 0.0782 | 0.0153 | 0.0166 | 0.0059 | 0.0069 | 0.0023 |
| TJP1_P326_R       | 0.0416 | 0.1141 | 0.1147 | 0.0177 | 0.0542 | 0.0111 | 0.1197 | 0.0180 | 0.0197 | 0.0165 | 0.0164 | 0.0702 |
| TJP1_P390_F       | 0.0094 | 0.0000 | 0.0086 | 0.0078 | 0.0766 | 0.0051 | 0.0069 | 0.0057 | 0.0055 | 0.0000 | 0.0127 | 0.1558 |
| TK1_E47_F         | 0.1250 | 0.2638 | 0.0083 | 0.0134 | 0.0481 | 0.0161 | 0.0512 | 0.3462 | 0.0384 | 0.2727 | 0.0372 | 0.1974 |
| TK1_P62_R         | 0.0088 | 0.0129 | 0.0059 | 0.0076 | 0.0084 | 0.0045 | 0.0124 | 0.0070 | 0.0050 | 0.0111 | 0.0151 | 0.1903 |
| TMEFF1_E180_R     | 0.0061 | 0.0000 | 0.0081 | 0.0071 | 0.0085 | 0.0044 | 0.0000 | 0.0000 | 0.0033 | 0.0094 | 0.0088 | 0.0057 |
| TMEFF1_P234_F     | 0.0011 | 0.0000 | 0.0059 | 0.1547 | 0.0000 | 0.1258 | 0.0052 | 0.0040 | 0.0000 | 0.0000 | 0.0038 | 0.0000 |
| TMEFF2_P152_R     | 0.3843 | 0.4232 | 0.0632 | 0.2324 | 0.3790 | 0.0697 | 0.3424 | 0.0590 | 0.0777 | 0.0741 | 0.1811 | 0.2659 |
| TMEFF2_P210_R     | 0.0000 | 0.0000 | 0.0058 | 0.0000 | 0.0000 | 0.0004 | 0.0078 | 0.0000 | 0.0000 | 0.0007 | 0.0000 | 0.0051 |
| TMEM63A_E63_F     | 0.0000 | 0.0000 | 0.0000 | 0.0000 | 0.0051 | 0.0000 | 0.0000 | 0.0065 | 0.0000 | 0.0007 | 0.0029 | 0.0000 |
| TMPRSS4_E83_F     | 0.8758 | 0.9879 | 0.9859 | 0.9855 | 0.9860 | 0.9773 | 0.9906 | 0.9892 | 0.9852 | 0.9757 | 0.9078 | 0.0000 |
| TMPRSS4_P552_F    | 0.8954 | 0.4149 | 0.9778 | 0.7676 | 0.9774 | 0.8887 | 0.0541 | 0.0428 | 0.0284 | 0.9115 | 0.9848 | 0.9917 |
| TNC_P198_F        | 0.0000 | 0.0031 | 0.0000 | 0.0827 | 0.0000 | 0.0000 | 0.0000 | 0.0074 | 0.0000 | 0.0000 | 0.0039 | 0.0000 |
| TNC_P57_F         | 0.0063 | 0.0092 | 0.0075 | 0.4231 | 0.0100 | 0.0038 | 0.0142 | 0.0081 | 0.0026 | 0.0096 | 0.0097 | 0.0071 |
| TNF_P1084_F       | 0.9883 | 0.9923 | 0.9833 | 0.9747 | 0.9940 | 0.9888 | 0.9952 | 0.9905 | 0.9918 | 0.9900 | 0.9913 | 0.0030 |
| TNF_P158_F        | 0.0000 | 0.0000 | 0.0054 | 0.0007 | 0.0000 | 0.0000 | 0.0000 | 0.0000 | 0.0000 | 0.0013 | 0.0003 | 0.0665 |
| TNFRSF10A_P171_F  | 0.0068 | 0.0095 | 0.0077 | 0.0102 | 0.0128 | 0.0094 | 0.0118 | 0.0221 | 0.0079 | 0.0160 | 0.0162 | 0.1390 |
| TNFRSF10A_P91_F   | 0.0024 | 0.0128 | 0.0055 | 0.0016 | 0.0071 | 0.0000 | 0.0000 | 0.0088 | 0.0000 | 0.0000 | 0.0085 | 0.0000 |
| TNFRSF10B_P108_R  | 0.0155 | 0.1050 | 0.0129 | 0.0252 | 0.0168 | 0.0479 | 0.0684 | 0.0260 | 0.1010 | 0.0858 | 0.0323 | 0.0129 |
| TNFRSF10C_E109_F  | 0.0038 | 0.0077 | 0.0093 | 0.0037 | 0.0077 | 0.0037 | 0.0000 | 0.0052 | 0.0031 | 0.0052 | 0.0092 | 0.2597 |
| TNFRSF10D_E27_F   | 0.0030 | 0.0076 | 0.0036 | 0.0040 | 0.0020 | 0.0030 | 0.0000 | 0.0074 | 0.0035 | 0.0098 | 0.0069 | 0.0041 |
| TNFRSF10D_P70_F   | 0.0159 | 0.0150 | 0.0207 | 0.0172 | 0.0149 | 0.0206 | 0.0398 | 0.1328 | 0.0284 | 0.0132 | 0.0291 | 0.0065 |
| TNFRSF1B_E5_F     | 0.0087 | 0.0000 | 0.0000 | 0.0121 | 0.0152 | 0.0100 | 0.0000 | 0.0061 | 0.0039 | 0.0089 | 0.0139 | 0.0000 |

|                   |        |        |        |        |        |        |        |        |        |        |        |        |
|-------------------|--------|--------|--------|--------|--------|--------|--------|--------|--------|--------|--------|--------|
| TNFRSF1B_P167_F   | 0.0032 | 0.0000 | 0.0003 | 0.0016 | 0.0068 | 0.0849 | 0.0039 | 0.0000 | 0.0000 | 0.0038 | 0.0085 | 0.0000 |
| TNFSF10_E53_F     | 0.0241 | 0.0159 | 0.0114 | 0.0177 | 0.0154 | 0.1076 | 0.2267 | 0.0099 | 0.0000 | 0.0160 | 0.0150 | 0.3176 |
| TNFSF10_P2_R      | 0.0000 | 0.0000 | 0.0000 | 0.0000 | 0.0000 | 0.0000 | 0.0000 | 0.0000 | 0.0000 | 0.0000 | 0.0000 | 0.9867 |
| TNFSF8_E258_R     | 0.0221 | 0.0000 | 0.0000 | 0.0067 | 0.0000 | 0.0032 | 0.0000 | 0.0008 | 0.0000 | 0.0115 | 0.0099 | 0.0021 |
| TNFSF8_P184_F     | 0.0037 | 0.0040 | 0.0006 | 0.0028 | 0.0063 | 0.0015 | 0.0068 | 0.0000 | 0.0013 | 0.0037 | 0.0065 | 0.0037 |
| TNK1_P41_R        | 0.0167 | 0.0105 | 0.0234 | 0.0157 | 0.0358 | 0.2870 | 0.0476 | 0.0327 | 0.0238 | 0.0178 | 0.0245 | 0.0159 |
| TP73_E155_F       | 0.0255 | 0.5007 | 0.0086 | 0.0092 | 0.0084 | 0.0071 | 0.0127 | 0.3235 | 0.0064 | 0.4094 | 0.0163 | 0.6357 |
| TP73_P496_F       | 0.0000 | 0.0000 | 0.0037 | 0.2215 | 0.0033 | 0.0251 | 0.0111 | 0.0066 | 0.0000 | 0.0051 | 0.0050 | 0.9902 |
| TP73_P945_F       | 0.0077 | 0.0086 | 0.0055 | 0.3676 | 0.0487 | 0.0659 | 0.0000 | 0.0000 | 0.0078 | 0.0083 | 0.0101 | 0.0165 |
| TPEF_seq_44_S36_F | 0.0052 | 0.0000 | 0.0095 | 0.0061 | 0.0047 | 0.0044 | 0.0000 | 0.0078 | 0.0000 | 0.7724 | 0.0125 | 0.0000 |
| TPEF_seq_44_S88_R | 0.0105 | 0.0534 | 0.0089 | 0.0112 | 0.0127 | 0.0130 | 0.0083 | 0.0610 | 0.0098 | 0.0088 | 0.0116 | 0.0169 |
| TRIM29_P261_F     | 0.9858 | 0.8500 | 0.9878 | 0.9777 | 0.9804 | 0.9786 | 0.9917 | 0.0394 | 0.9837 | 0.6978 | 0.9867 | 0.7645 |
| TRIP6_E33_F       | 0.0116 | 0.0131 | 0.0065 | 0.0707 | 0.2082 | 0.0082 | 0.1247 | 0.0069 | 0.0088 | 0.0091 | 0.3714 | 0.0072 |
| TSG101_P257_R     | 0.0020 | 0.0000 | 0.0000 | 0.0001 | 0.0043 | 0.0198 | 0.0000 | 0.0043 | 0.6138 | 0.0000 | 0.0068 | 0.0000 |
| TUBB3_E91_F       | 0.0023 | 0.0024 | 0.4935 | 0.0028 | 0.0032 | 0.2208 | 0.0000 | 0.0030 | 0.0000 | 0.0044 | 0.0053 | 0.0000 |
| TUBB3_P364_F      | 0.0000 | 0.0000 | 0.0000 | 0.0000 | 0.0000 | 0.0000 | 0.0000 | 0.0000 | 0.0000 | 0.0011 | 0.0000 | 0.0000 |
| TUBB3_P721_R      | 0.0016 | 0.0000 | 0.0000 | 0.0047 | 0.0060 | 0.0000 | 0.0000 | 0.0038 | 0.0000 | 0.0043 | 0.0092 | 0.0000 |
| TUSC3_E29_R       | 0.0099 | 0.0075 | 0.0057 | 0.1553 | 0.0088 | 0.0054 | 0.0086 | 0.0000 | 0.0000 | 0.0110 | 0.0126 | 0.0000 |
| TUSC3_P85_R       | 0.0794 | 0.0090 | 0.0048 | 0.1060 | 0.0048 | 0.0790 | 0.0114 | 0.0073 | 0.0031 | 0.0131 | 0.0172 | 0.0000 |
| TWIST1_E117_R     | 0.0000 | 0.0000 | 0.0000 | 0.0000 | 0.0000 | 0.0000 | 0.0000 | 0.0000 | 0.0000 | 0.0000 | 0.0000 | 0.0000 |
| TWIST1_P355_R     | 0.0000 | 0.0000 | 0.0031 | 0.2045 | 0.0066 | 0.0046 | 0.0036 | 0.0048 | 0.0062 | 0.0021 | 0.0082 | 0.0000 |
| TWIST1_P44_R      | 0.0000 | 0.0000 | 0.0000 | 0.0000 | 0.0000 | 0.0000 | 0.0000 | 0.0000 | 0.0000 | 0.0000 | 0.0000 | 0.0000 |
| TYRO3_P501_F      | 0.0000 | 0.0000 | 0.0000 | 0.0000 | 0.0001 | 0.0000 | 0.0000 | 0.0013 | 0.0000 | 0.0000 | 0.0022 | 0.0000 |
| UBA52_P293_R      | 0.0000 | 0.0000 | 0.0000 | 0.0000 | 0.0000 | 0.0000 | 0.1050 | 0.0000 | 0.0000 | 0.0072 | 0.0034 | 0.0000 |
| UGT1A1_E11_F      | 0.8306 | 0.9438 | 0.9905 | 0.9850 | 0.9832 | 0.9852 | 0.0000 | 0.9927 | 0.9906 | 0.9884 | 0.9915 | 0.9917 |
| UGT1A1_P564_R     | 0.9634 | 0.9385 | 0.8955 | 0.9327 | 0.7379 | 0.9503 | 0.9598 | 0.5854 | 0.8273 | 0.8516 | 0.8598 | 0.9559 |
| UGT1A7_P751_R     | 0.9656 | 0.9905 | 0.9903 | 0.9839 | 0.7581 | 0.9837 | 0.0000 | 0.9848 | 0.9054 | 0.9903 | 0.9897 | 0.9895 |
| UNG_P170_F        | 0.0119 | 0.0000 | 0.0137 | 0.0058 | 0.0061 | 0.1434 | 0.0000 | 0.0000 | 0.0017 | 0.0081 | 0.0062 | 0.0059 |
| USP29_E274_F      | 0.9920 | 0.9923 | 0.9761 | 0.9309 | 0.8715 | 0.9634 | 0.0000 | 0.9920 | 0.9898 | 0.9897 | 0.8828 | 0.9905 |
| USP29_P282_R      | 0.9840 | 0.9908 | 0.9843 | 0.9818 | 0.0000 | 0.9758 | 0.7066 | 0.9910 | 0.9875 | 0.0000 | 0.9895 | 0.4405 |
| VAMP8_P114_F      | 0.0161 | 0.1160 | 0.0139 | 0.0105 | 0.0162 | 0.0154 | 0.0125 | 0.0154 | 0.0111 | 0.0086 | 0.0141 | 0.1734 |
| VAV1_E9_F         | 0.0739 | 0.0000 | 0.0066 | 0.0127 | 0.0082 | 0.0100 | 0.0069 | 0.0078 | 0.0087 | 0.0084 | 0.0114 | 0.0000 |
| VAV1_P317_F       | 0.0021 | 0.0050 | 0.0000 | 0.0048 | 0.0037 | 0.0000 | 0.0000 | 0.0035 | 0.0007 | 0.0040 | 0.0079 | 0.0000 |

|                |        |        |        |        |        |        |        |        |        |        |        |        |
|----------------|--------|--------|--------|--------|--------|--------|--------|--------|--------|--------|--------|--------|
| VAV2_E58_F     | 0.0176 | 0.1986 | 0.0212 | 0.0206 | 0.1808 | 0.0146 | 0.1335 | 0.1725 | 0.2158 | 0.2049 | 0.0157 | 0.2062 |
| VAV2_P1182_F   | 0.0000 | 0.0000 | 0.0000 | 0.0000 | 0.0021 | 0.0000 | 0.0024 | 0.0000 | 0.0000 | 0.0000 | 0.0000 | 0.0000 |
| VBP1_P12_R     | 0.0000 | 0.0000 | 0.0010 | 0.5147 | 0.0089 | 0.3503 | 0.0000 | 0.0000 | 0.0000 | 0.0037 | 0.0015 | 0.0000 |
| VEGFB_P658_F   | 0.0052 | 0.0072 | 0.0144 | 0.0064 | 0.0073 | 0.1430 | 0.0116 | 0.0060 | 0.0033 | 0.0074 | 0.0095 | 0.0114 |
| VIM_P811_R     | 0.0005 | 0.0000 | 0.0000 | 0.0000 | 0.0034 | 0.0000 | 0.0059 | 0.0008 | 0.0000 | 0.0000 | 0.0055 | 0.0000 |
| WEE1_P924_R    | 0.8405 | 0.0000 | 0.9606 | 0.8858 | 0.9901 | 0.9846 | 0.9945 | 0.9890 | 0.0000 | 0.9881 | 0.9895 | 0.0000 |
| WNT2_E109_R    | 0.0000 | 0.0000 | 0.0000 | 0.0000 | 0.0000 | 0.0000 | 0.0000 | 0.0000 | 0.0000 | 0.0000 | 0.0000 | 0.0000 |
| WNT2_P217_F    | 0.0471 | 0.2638 | 0.0335 | 0.0371 | 0.0407 | 0.0405 | 0.1870 | 0.0252 | 0.0291 | 0.0251 | 0.0319 | 0.2203 |
| WNT2B_P1185_R  | 0.0801 | 0.0023 | 0.0054 | 0.3029 | 0.0257 | 0.0124 | 0.0385 | 0.0092 | 0.0148 | 0.0251 | 0.0153 | 0.0543 |
| WNT5A_E43_F    | 0.0217 | 0.0314 | 0.0109 | 0.0190 | 0.0152 | 0.0706 | 0.0146 | 0.5313 | 0.5275 | 0.0118 | 0.0633 | 0.0295 |
| WNT5A_P655_F   | 0.0000 | 0.0000 | 0.0067 | 0.0042 | 0.0093 | 0.0046 | 0.2398 | 0.0000 | 0.0060 | 0.0076 | 0.0027 | 0.1402 |
| WNT8B_E487_F   | 0.9814 | 0.7363 | 0.9747 | 0.9470 | 0.9903 | 0.9672 | 0.3223 | 0.2895 | 0.1911 | 0.3676 | 0.9839 | 0.0196 |
| WNT8B_P216_R   | 0.0000 | 0.0000 | 0.9604 | 0.9769 | 0.9882 | 0.9706 | 0.9939 | 0.0000 | 0.0000 | 0.9867 | 0.9794 | 0.0000 |
| WRN_E57_F      | 0.7112 | 0.4181 | 0.0299 | 0.0414 | 0.0231 | 0.0490 | 0.1710 | 0.0121 | 0.0448 | 0.4148 | 0.0256 | 0.2339 |
| WRN_P969_F     | 0.9828 | 0.9886 | 0.0001 | 0.9501 | 0.7654 | 0.9772 | 0.0000 | 0.0000 | 0.0000 | 0.9872 | 0.8658 | 0.0000 |
| WT1_E32_F      | 0.0045 | 0.0053 | 0.0035 | 0.0102 | 0.0382 | 0.1204 | 0.0198 | 0.0000 | 0.0007 | 0.0153 | 0.0000 | 0.0000 |
| WT1_P853_F     | 0.0029 | 0.0015 | 0.0019 | 0.0044 | 0.0000 | 0.2061 | 0.0000 | 0.0014 | 0.0000 | 0.0060 | 0.0087 | 0.0240 |
| XRCC1_P681_R   | 0.8248 | 0.0000 | 0.8981 | 0.9793 | 0.0000 | 0.9816 | 0.0000 | 0.9898 | 0.9904 | 0.0000 | 0.9549 | 0.9900 |
| XRCC2_P1077_F  | 0.9894 | 0.9941 | 0.9873 | 0.9872 | 0.9872 | 0.9875 | 0.9942 | 0.9881 | 0.9837 | 0.9389 | 0.9859 | 0.9902 |
| YES1_P600_F    | 0.0095 | 0.1592 | 0.0139 | 0.0124 | 0.0181 | 0.0132 | 0.0808 | 0.0136 | 0.0074 | 0.0122 | 0.0172 | 0.2027 |
| ZIM3_E203_F    | 0.9880 | 0.9930 | 0.9883 | 0.9836 | 0.9741 | 0.9806 | 0.9901 | 0.0000 | 0.9898 | 0.9867 | 0.9866 | 0.9912 |
| ZIM3_P451_R    | 0.9879 | 0.9936 | 0.9873 | 0.9823 | 0.0217 | 0.9836 | 0.9935 | 0.9912 | 0.9916 | 0.9835 | 0.9890 | 0.9904 |
| ZIM3_P718_R    | 0.9036 | 0.9858 | 0.9334 | 0.9811 | 0.0000 | 0.9851 | 0.0000 | 0.9903 | 0.9880 | 0.0000 | 0.9871 | 0.0000 |
| ZMYND10_E77_R  | 0.0006 | 0.0000 | 0.0000 | 0.0000 | 0.0080 | 0.0000 | 0.0000 | 0.0031 | 0.0000 | 0.0000 | 0.0007 | 0.0000 |
| ZNF215_P71_R   | 0.0059 | 0.0076 | 0.0038 | 0.0077 | 0.7072 | 0.0051 | 0.0000 | 0.0102 | 0.0031 | 0.0116 | 0.0130 | 0.0057 |
| ZNF264_E48_R   | 0.0000 | 0.0002 | 0.0000 | 0.0000 | 0.0000 | 0.0000 | 0.0000 | 0.0000 | 0.0000 | 0.0005 | 0.0018 | 0.0005 |
| ZNFN1A1_E102_F | 0.9872 | 0.5194 | 0.5090 | 0.9286 | 0.2918 | 0.9728 | 0.0000 | 0.9791 | 0.9777 | 0.9838 | 0.6441 | 0.9862 |
| ZNFN1A1_P179_F | 0.0763 | 0.9896 | 0.9813 | 0.9831 | 0.9905 | 0.9806 | 0.0000 | 0.9892 | 0.9911 | 0.8565 | 0.2437 | 0.9934 |



| CONTROL_7 | CONTROL_8 | TargetID        | CONTROL_9 | CONTROL_10 | CONTROL_11 | CONTROL_12 | CONTROL_13 | CONTROL_14 |
|-----------|-----------|-----------------|-----------|------------|------------|------------|------------|------------|
| 0.9884    | 0.9884    | AATK_E63_R      | 0.9787    | 0.9836     | 0.9835     | 0.9902     | 0.0000     | 0.8770     |
| 0.9832    | 0.9944    | ABCA1_E120_R    | 0.9860    | 0.9833     | 0.9853     | 0.9901     | 0.0000     | 0.9858     |
| 0.9737    | 0.9446    | ABCA1_P45_F     | 0.9815    | 0.9849     | 0.9793     | 0.0000     | 0.9892     | 0.9820     |
| 0.0045    | 0.0725    | ABCB4_E429_F    | 0.0032    | 0.0069     | 0.0000     | 0.0191     | 0.1130     | 0.0051     |
| 0.9818    | 0.1543    | ABCC2_P88_F     | 0.0168    | 0.3889     | 0.0053     | 0.0901     | 0.0262     | 0.0194     |
| 0.0096    | 0.0063    | ABCC5_P444_F    | 0.2352    | 0.0117     | 0.0627     | 0.0050     | 0.0000     | 0.0063     |
| 0.0273    | 0.4622    | ABCG2_P178_R    | 0.0317    | 0.0369     | 0.0102     | 0.4704     | 0.6365     | 0.0481     |
| 0.9816    | 0.9837    | ABCG2_P310_R    | 0.9787    | 0.9830     | 0.9801     | 0.9883     | 0.9865     | 0.9814     |
| 0.9620    | 0.2525    | ABL1_P53_F      | 0.9826    | 0.8949     | 0.9815     | 0.2811     | 0.8339     | 0.9825     |
| 0.0000    | 0.0041    | ABL2_P459_R     | 0.0000    | 0.0000     | 0.0000     | 0.0000     | 0.0028     | 0.0000     |
| 0.0090    | 0.0038    | ABO_E110_F      | 0.0093    | 0.2038     | 0.2460     | 0.0061     | 0.0062     | 0.0163     |
| 0.0112    | 0.0069    | ABO_P312_F      | 0.0360    | 0.1819     | 0.0849     | 0.0069     | 0.1682     | 0.0169     |
| 0.0016    | 0.0011    | ACTG2_P455_R    | 0.0032    | 0.0034     | 0.0000     | 0.0017     | 0.0064     | 0.0000     |
| 0.0060    | 0.0015    | ACVR1_P983_F    | 0.0010    | 0.0041     | 0.0000     | 0.0000     | 0.0000     | 0.0000     |
| 0.0058    | 0.0727    | ACVR1B_E497_R   | 0.4991    | 0.0066     | 0.0000     | 0.0112     | 0.0000     | 0.0044     |
| 0.0143    | 0.9912    | ACVR1B_P572_R   | 0.0104    | 0.0148     | 0.0274     | 0.0142     | 0.0129     | 0.2966     |
| 0.0050    | 0.0047    | ACVR1C_P115_R   | 0.0052    | 0.0062     | 0.0356     | 0.5985     | 0.0034     | 0.0007     |
| 0.9858    | 0.9933    | ACVR1C_P363_F   | 0.9875    | 0.9871     | 0.9859     | 0.9931     | 0.9935     | 0.9834     |
| 0.9722    | 0.3279    | ACVR2B_E27_R    | 0.9806    | 0.9788     | 0.9750     | 0.0143     | 0.8397     | 0.9750     |
| 0.0000    | 0.0000    | ACVR2B_P676_F   | 0.0000    | 0.0000     | 0.0000     | 0.0000     | 0.0000     | 0.0000     |
| 0.0000    | 0.0000    | ADAMTS12_P250_R | 0.0000    | 0.0023     | 0.0000     | 0.0000     | 0.0000     | 0.0000     |
| 0.0038    | 0.0087    | ADCYAP1_E163_R  | 0.0051    | 0.0093     | 0.0000     | 0.0006     | 0.0023     | 0.0091     |
| 0.8089    | 0.9914    | ADCYAP1_P398_F  | 0.9824    | 0.9811     | 0.9783     | 0.9207     | 0.9248     | 0.9805     |
| 0.0123    | 0.0128    | ADCYAP1_P455_R  | 0.0227    | 0.0210     | 0.0169     | 0.0137     | 0.5180     | 0.0206     |
| 0.1852    | 0.0032    | AFF3_P122_F     | 0.0054    | 0.1199     | 0.1109     | 0.6774     | 0.0000     | 0.1781     |
| 0.0089    | 0.0055    | AFF3_P808_F     | 0.4031    | 0.3354     | 0.0541     | 0.0000     | 0.0000     | 0.0028     |
| 0.0088    | 0.0081    | AFP_P824_F      | 0.4445    | 0.2801     | 0.0678     | 0.1351     | 0.5917     | 0.4002     |
| 0.0000    | 0.0000    | AGTR1_P154_F    | 0.0000    | 0.0000     | 0.0848     | 0.0000     | 0.0000     | 0.0000     |
| 0.0178    | 0.3178    | AGTR1_P41_F     | 0.0123    | 0.0138     | 0.0141     | 0.5666     | 0.4411     | 0.0143     |
| 0.5370    | 0.9863    | AHR_E103_F      | 0.9027    | 0.4410     | 0.9597     | 0.0000     | 0.0000     | 0.9788     |
| 0.7903    | 0.4705    | AHR_P166_R      | 0.7914    | 0.8258     | 0.8381     | 0.7215     | 0.4914     | 0.8721     |

|        |        |                |        |        |        |        |        |        |
|--------|--------|----------------|--------|--------|--------|--------|--------|--------|
| 0.0103 | 0.1872 | AIM2_E208_F    | 0.0126 | 0.1765 | 0.0035 | 0.1251 | 0.0000 | 0.0140 |
| 0.0930 | 0.0052 | AKT1_P310_R    | 0.2252 | 0.0113 | 0.1781 | 0.0076 | 0.0052 | 0.0090 |
| 0.7422 | 0.2104 | ALK_P28_F      | 0.1390 | 0.5021 | 0.4430 | 0.0626 | 0.0041 | 0.2199 |
| 0.0002 | 0.0025 | ALOX12_E85_R   | 0.0001 | 0.0005 | 0.0000 | 0.0000 | 0.0015 | 0.0000 |
| 0.9823 | 0.5702 | ALOX12_P223_R  | 0.9752 | 0.9771 | 0.9794 | 0.0094 | 0.6328 | 0.9770 |
| 0.9493 | 0.0000 | APBA1_E99_R    | 0.9065 | 0.0000 | 0.9502 | 0.0000 | 0.0000 | 0.9360 |
| 0.0000 | 0.0000 | APBA1_P644_F   | 0.8259 | 0.0000 | 0.5226 | 0.0000 | 0.0000 | 0.0000 |
| 0.0046 | 0.0000 | APBA2_P227_F   | 0.0045 | 0.0037 | 0.0000 | 0.0000 | 0.0031 | 0.3353 |
| 0.9833 | 0.0000 | APC_P280_R     | 0.9815 | 0.9811 | 0.9830 | 0.0000 | 0.0000 | 0.7264 |
| 0.0000 | 0.0104 | APOA1_P75_F    | 0.0000 | 0.0000 | 0.0000 | 0.0106 | 0.0000 | 0.3651 |
| 0.0862 | 0.8619 | APOC1_P406_R   | 0.3681 | 0.5974 | 0.3680 | 0.0062 | 0.0039 | 0.0368 |
| 0.0013 | 0.0000 | APP_E8_F       | 0.0000 | 0.0026 | 0.0000 | 0.1638 | 0.0040 | 0.0007 |
| 0.0145 | 0.0184 | APP_P179_R     | 0.0176 | 0.0213 | 0.0138 | 0.0160 | 0.5798 | 0.0226 |
| 0.0080 | 0.1962 | AR_P189_R      | 0.2283 | 0.0094 | 0.3830 | 0.2899 | 0.0074 | 0.0093 |
| 0.0055 | 0.0000 | AREG_E25_F     | 0.0014 | 0.0060 | 0.0000 | 0.0000 | 0.0023 | 0.0033 |
| 0.3524 | 0.0141 | ARHGDI1_P148_R | 0.2367 | 0.0391 | 0.1594 | 0.0177 | 0.0106 | 0.0333 |
| 0.0078 | 0.0015 | ARNT_P238_R    | 0.0135 | 0.0067 | 0.0003 | 0.0835 | 0.0026 | 0.0087 |
| 0.0128 | 0.0270 | ASB4_P391_F    | 0.0116 | 0.0071 | 0.0000 | 0.0038 | 0.1647 | 0.0290 |
| 0.0052 | 0.0000 | ASB4_P52_R     | 0.0036 | 0.1794 | 0.0162 | 0.0053 | 0.0000 | 0.0042 |
| 0.0000 | 0.0000 | ASCL1_E24_F    | 0.0000 | 0.0000 | 0.0000 | 0.0000 | 0.0000 | 0.0000 |
| 0.0073 | 0.0000 | ASCL1_P747_F   | 0.0047 | 0.0074 | 0.0000 | 0.0038 | 0.1681 | 0.0049 |
| 0.0000 | 0.0000 | ASCL2_E76_R    | 0.0000 | 0.0000 | 0.0000 | 0.0000 | 0.0000 | 0.0000 |
| 0.0000 | 0.0000 | ASCL2_P360_F   | 0.1027 | 0.0000 | 0.2046 | 0.0000 | 0.0015 | 0.0000 |
| 0.7384 | 0.0000 | ASCL2_P609_R   | 0.0000 | 0.0000 | 0.0000 | 0.0000 | 0.0000 | 0.0000 |
| 0.0059 | 0.0000 | ATP10A_P147_F  | 0.0014 | 0.0151 | 0.0000 | 0.0000 | 0.0000 | 0.3798 |
| 0.0099 | 0.0000 | ATP10A_P524_R  | 0.0095 | 0.0152 | 0.0000 | 0.0000 | 0.0112 | 0.0108 |
| 0.0131 | 0.0147 | AXIN1_P995_R   | 0.0152 | 0.0164 | 0.0117 | 0.0180 | 0.0245 | 0.0201 |
| 0.0034 | 0.0011 | AXL_E61_F      | 0.0039 | 0.0042 | 0.0000 | 0.0057 | 0.0069 | 0.0976 |
| 0.0134 | 0.4720 | BAX_E281_R     | 0.0149 | 0.0226 | 0.1471 | 0.0239 | 0.0126 | 0.0169 |
| 0.1540 | 0.4328 | BCAM_E100_R    | 0.0084 | 0.0123 | 0.0039 | 0.0758 | 0.0039 | 0.2174 |
| 0.0134 | 0.0062 | BCAM_P205_F    | 0.0164 | 0.0209 | 0.1155 | 0.0177 | 0.3328 | 0.5054 |
| 0.0143 | 0.0152 | BCAP31_P1131_F | 0.0160 | 0.0145 | 0.0128 | 0.2068 | 0.6013 | 0.0135 |
| 0.0000 | 0.0000 | BCL2L2_E172_F  | 0.0000 | 0.0000 | 0.0000 | 0.0000 | 0.0029 | 0.0000 |

|        |        |                 |        |        |        |        |        |        |
|--------|--------|-----------------|--------|--------|--------|--------|--------|--------|
| 0.0083 | 0.0037 | BCL2L2_P280_F   | 0.0062 | 0.0101 | 0.0000 | 0.0064 | 0.0000 | 0.0040 |
| 0.0030 | 0.0015 | BCL3_E71_F      | 0.0022 | 0.0493 | 0.0000 | 0.0039 | 0.0011 | 0.0022 |
| 0.0124 | 0.0908 | BCL3_P1038_R    | 0.1071 | 0.2707 | 0.0492 | 0.0075 | 0.0000 | 0.0092 |
| 0.0059 | 0.0000 | BCL6_P248_R     | 0.0039 | 0.0076 | 0.0000 | 0.0036 | 0.0000 | 0.0053 |
| 0.0446 | 0.0026 | BDNF_E19_R      | 0.0288 | 0.0377 | 0.0179 | 0.1032 | 0.0031 | 0.0245 |
| 0.9861 | 0.9923 | BDNF_P259_R     | 0.9859 | 0.9863 | 0.9861 | 0.9913 | 0.9926 | 0.9878 |
| 0.0051 | 0.9927 | BGN_E282_R      | 0.0031 | 0.0059 | 0.0000 | 0.0049 | 0.0036 | 0.0052 |
| 0.0104 | 0.0067 | BGN_P333_R      | 0.0016 | 0.0078 | 0.0260 | 0.0036 | 0.0000 | 0.0033 |
| 0.0136 | 0.3872 | BIRC4_P122_R    | 0.0120 | 0.1585 | 0.0323 | 0.0094 | 0.3929 | 0.1392 |
| 0.0112 | 0.0701 | BIRC5_E89_F     | 0.2670 | 0.0247 | 0.0695 | 0.0097 | 0.0088 | 0.0155 |
| 0.0123 | 0.0153 | BLK_P14_F       | 0.0174 | 0.0115 | 0.0019 | 0.2593 | 0.0066 | 0.1781 |
| 0.0110 | 0.3152 | BMP2_E48_R      | 0.0057 | 0.0110 | 0.0754 | 0.0130 | 0.0099 | 0.0100 |
| 0.0282 | 0.0000 | BMP2_P1201_F    | 0.0034 | 0.0033 | 0.0103 | 0.0000 | 0.0000 | 0.0000 |
| 0.0000 | 0.0000 | BMP3_E147_F     | 0.0000 | 0.0000 | 0.0000 | 0.0000 | 0.0000 | 0.0000 |
| 0.0066 | 0.0000 | BMP3_P56_R      | 0.4039 | 0.0078 | 0.0000 | 0.0027 | 0.0000 | 0.0068 |
| 0.0249 | 0.5737 | BMP4_P199_R     | 0.1756 | 0.5418 | 0.5093 | 0.5150 | 0.0077 | 0.5501 |
| 0.9844 | 0.9927 | BMP6_P398_F     | 0.9856 | 0.9856 | 0.9838 | 0.0012 | 0.9934 | 0.9857 |
| 0.0099 | 0.5757 | BMPR1A_P956_F   | 0.2464 | 0.0135 | 0.1622 | 0.0069 | 0.4384 | 0.0115 |
| 0.0000 | 0.0000 | BMPR2_E435_F    | 0.0000 | 0.0000 | 0.0000 | 0.0000 | 0.0000 | 0.0000 |
| 0.0284 | 0.2048 | BMPR2_P1271_F   | 0.1171 | 0.0375 | 0.0111 | 0.0040 | 0.0021 | 0.2021 |
| 0.1122 | 0.1078 | BSG_P211_R      | 0.1300 | 0.0827 | 0.1046 | 0.0950 | 0.0738 | 0.0817 |
| 0.5400 | 0.0101 | BTK_P105_F      | 0.0148 | 0.0188 | 0.0890 | 0.0101 | 0.0087 | 0.0147 |
| 0.0097 | 0.4814 | C20orf47_P225_R | 0.0007 | 0.0132 | 0.0000 | 0.0177 | 0.1413 | 0.0023 |
| 0.4133 | 0.1224 | CALCA_E174_R    | 0.0596 | 0.0680 | 0.0349 | 0.5787 | 0.0605 | 0.0791 |
| 0.0043 | 0.0000 | CAPG_E228_F     | 0.0704 | 0.0042 | 0.0900 | 0.8261 | 0.5882 | 0.0941 |
| 0.0140 | 0.0000 | CASP10_E139_F   | 0.0039 | 0.0031 | 0.0000 | 0.2447 | 0.0031 | 0.0040 |
| 0.7308 | 0.1878 | CASP10_P186_F   | 0.9698 | 0.9813 | 0.9782 | 0.0000 | 0.0000 | 0.9802 |
| 0.0289 | 0.0399 | CASP2_P192_F    | 0.0330 | 0.0279 | 0.0222 | 0.0308 | 0.0285 | 0.0346 |
| 0.0084 | 0.0000 | CASP3_P420_R    | 0.0027 | 0.0058 | 0.0511 | 0.0058 | 0.2302 | 0.0009 |
| 0.7276 | 0.0000 | CASP6_P201_F    | 0.9039 | 0.9075 | 0.8225 | 0.0267 | 0.0000 | 0.9334 |
| 0.2853 | 0.0040 | CASP6_P230_R    | 0.1167 | 0.0146 | 0.2311 | 0.0050 | 0.0000 | 0.1812 |
| 0.0000 | 0.1945 | CAV1_P130_R     | 0.3693 | 0.0000 | 0.0948 | 0.0107 | 0.1911 | 0.0052 |
| 0.0477 | 0.0460 | CAV1_P169_F     | 0.1337 | 0.0242 | 0.0358 | 0.0208 | 0.0100 | 0.0221 |

|        |        |              |        |        |        |        |        |        |
|--------|--------|--------------|--------|--------|--------|--------|--------|--------|
| 0.3354 | 0.5928 | CAV2_E33_R   | 0.1005 | 0.0924 | 0.4430 | 0.9837 | 0.6867 | 0.3180 |
| 0.0152 | 0.0565 | CCKBR_P361_R | 0.0111 | 0.0194 | 0.0050 | 0.0044 | 0.4734 | 0.0163 |
| 0.0000 | 0.0020 | CCKBR_P480_F | 0.0000 | 0.0000 | 0.0000 | 0.0000 | 0.7415 | 0.0000 |
| 0.9813 | 0.0000 | CCNA1_E7_F   | 0.9789 | 0.9828 | 0.9763 | 0.0000 | 0.0701 | 0.9813 |
| 0.0000 | 0.0000 | CCNA1_P216_F | 0.0000 | 0.0000 | 0.1177 | 0.0000 | 0.0017 | 0.0019 |
| 0.0000 | 0.0018 | CCNC_P132_R  | 0.3235 | 0.5717 | 0.0693 | 0.0000 | 0.0045 | 0.3246 |
| 0.5834 | 0.0025 | CCND1_E280_R | 0.2153 | 0.2973 | 0.7044 | 0.0000 | 0.0048 | 0.2747 |
| 0.0000 | 0.0000 | CCND1_P343_R | 0.0000 | 0.0000 | 0.0000 | 0.0000 | 0.0000 | 0.0000 |
| 0.0000 | 0.0000 | CCND2_P887_F | 0.0000 | 0.0017 | 0.0000 | 0.0000 | 0.0000 | 0.0000 |
| 0.0844 | 0.4363 | CCND2_P898_R | 0.6110 | 0.8581 | 0.7000 | 0.0254 | 0.6204 | 0.8365 |
| 0.0000 | 0.0006 | CCNE1_P683_F | 0.0000 | 0.0000 | 0.0066 | 0.0000 | 0.0017 | 0.0000 |
| 0.0051 | 0.0067 | CD1A_P414_R  | 0.0103 | 0.0135 | 0.0138 | 0.0051 | 0.0067 | 0.0101 |
| 0.7629 | 0.0097 | CD2_P68_F    | 0.7387 | 0.5671 | 0.7971 | 0.0994 | 0.0051 | 0.1137 |
| 0.0301 | 0.0133 | CD34_P339_R  | 0.0137 | 0.0201 | 0.0112 | 0.0082 | 0.6001 | 0.0226 |
| 0.5218 | 0.9872 | CD34_P780_R  | 0.7631 | 0.8819 | 0.9269 | 0.6845 | 0.9684 | 0.9316 |
| 0.0062 | 0.0023 | CD40_E58_R   | 0.0027 | 0.0011 | 0.0000 | 0.2258 | 0.0000 | 0.0025 |
| 0.0222 | 0.0170 | CD40_P372_R  | 0.0204 | 0.0312 | 0.0516 | 0.0228 | 0.0069 | 0.0241 |
| 0.7849 | 0.0095 | CD44_E26_F   | 0.1377 | 0.0055 | 0.0813 | 0.0024 | 0.0000 | 0.0000 |
| 0.9863 | 0.0000 | CD44_P87_F   | 0.8833 | 0.0019 | 0.5712 | 0.0018 | 0.0039 | 0.1507 |
| 0.0104 | 0.0000 | CD86_P3_F    | 0.0000 | 0.0000 | 0.0000 | 0.0000 | 0.0000 | 0.0000 |
| 0.0000 | 0.0000 | CDC25B_E83_F | 0.0000 | 0.0000 | 0.0000 | 0.0000 | 0.0000 | 0.0000 |
| 0.0383 | 0.0000 | CDC25B_P11_R | 0.0131 | 0.0090 | 0.0023 | 0.0039 | 0.0611 | 0.0151 |
| 0.0000 | 0.0006 | CDH1_P52_R   | 0.0000 | 0.0196 | 0.0122 | 0.0000 | 0.0000 | 0.0000 |
| 0.0023 | 0.2200 | CDH11_E102_R | 0.0035 | 0.0041 | 0.0000 | 0.0064 | 0.0000 | 0.0048 |
| 0.0137 | 0.0090 | CDH11_P203_R | 0.0129 | 0.1660 | 0.1411 | 0.2508 | 0.4782 | 0.0154 |
| 0.0078 | 0.0044 | CDH11_P354_R | 0.0065 | 0.0075 | 0.0000 | 0.7696 | 0.0018 | 0.0067 |
| 0.9133 | 0.0045 | CDH13_E102_F | 0.9863 | 0.9837 | 0.9839 | 0.9923 | 0.9925 | 0.9818 |
| 0.0074 | 0.0000 | CDH17_E31_F  | 0.0111 | 0.0140 | 0.0996 | 0.0090 | 0.0067 | 0.0132 |
| 0.1084 | 0.5892 | CDH17_P532_F | 0.9755 | 0.9817 | 0.9752 | 0.5456 | 0.9906 | 0.9789 |
| 0.0208 | 0.1903 | CDH3_E100_R  | 0.0248 | 0.0334 | 0.0300 | 0.1943 | 0.1888 | 0.0263 |
| 0.0037 | 0.0018 | CDH3_P87_R   | 0.0030 | 0.0049 | 0.0000 | 0.0022 | 0.0000 | 0.0024 |
| 0.9816 | 0.9926 | CDK10_E74_F  | 0.5089 | 0.8658 | 0.7374 | 0.3979 | 0.9924 | 0.6323 |
| 0.0000 | 0.0000 | CDK2_P330_R  | 0.6388 | 0.8031 | 0.9715 | 0.9887 | 0.0000 | 0.9649 |

|        |        |                   |        |        |        |        |        |        |
|--------|--------|-------------------|--------|--------|--------|--------|--------|--------|
| 0.0080 | 0.0055 | CDK6_E256_F       | 0.0129 | 0.0061 | 0.2419 | 0.9745 | 0.0000 | 0.0062 |
| 0.0219 | 0.0179 | CDK6_P291_R       | 0.0218 | 0.0229 | 0.0112 | 0.3073 | 0.6740 | 0.0189 |
| 0.0036 | 0.0408 | CDKN1A_E101_F     | 0.7742 | 0.5989 | 0.3992 | 0.0001 | 0.0000 | 0.0055 |
| 0.0048 | 0.0000 | CDKN1A_P242_F     | 0.0070 | 0.0061 | 0.0252 | 0.0000 | 0.9848 | 0.0077 |
| 0.0000 | 0.0000 | CDKN1B_P1161_F    | 0.0000 | 0.0000 | 0.0000 | 0.0016 | 0.0000 | 0.5240 |
| 0.0104 | 0.1437 | CDKN2A_E121_R     | 0.0072 | 0.0088 | 0.0445 | 0.0050 | 0.0047 | 0.2308 |
| 0.0062 | 0.0000 | CDKN2B_E220_F     | 0.0039 | 0.0047 | 0.2683 | 0.6017 | 0.0000 | 0.0009 |
| 0.0107 | 0.0000 | CDM_seq_21_S260_R | 0.6383 | 0.0055 | 0.0565 | 0.0022 | 0.0000 | 0.0058 |
| 0.0023 | 0.0000 | CEACAM1_E57_R     | 0.0066 | 0.0074 | 0.0000 | 0.0068 | 0.0000 | 0.0053 |
| 0.0101 | 0.0071 | CEACAM1_P44_R     | 0.0081 | 0.0111 | 0.0011 | 0.0067 | 0.1451 | 0.0092 |
| 0.0190 | 0.1496 | CEBPA_P1163_R     | 0.0174 | 0.0228 | 0.0560 | 0.0094 | 0.0053 | 0.0141 |
| 0.3534 | 0.0000 | CEBPA_P706_F      | 0.0020 | 0.0124 | 0.1186 | 0.0023 | 0.0038 | 0.0079 |
| 0.0042 | 0.0005 | CFTR_P115_F       | 0.0028 | 0.0093 | 0.0000 | 0.0043 | 0.0000 | 0.0041 |
| 0.7292 | 0.0014 | CHD2_P451_F       | 0.0001 | 0.4902 | 0.2652 | 0.0028 | 0.0000 | 0.9737 |
| 0.1610 | 0.0018 | CHFR_P501_F       | 0.0036 | 0.0075 | 0.0000 | 0.0026 | 0.0018 | 0.0029 |
| 0.9879 | 0.0049 | CHFR_P635_R       | 0.9843 | 0.9827 | 0.9840 | 0.4945 | 0.8395 | 0.9858 |
| 0.0019 | 0.0048 | CHGA_E52_F        | 0.0000 | 0.0039 | 0.0000 | 0.0054 | 0.0000 | 0.0000 |
| 0.2974 | 0.0050 | CHI3L2_E10_F      | 0.3886 | 0.0402 | 0.5533 | 0.4350 | 0.0000 | 0.2560 |
| 0.0054 | 0.0000 | CLK1_P538_F       | 0.0000 | 0.0810 | 0.0000 | 0.0000 | 0.0000 | 0.0014 |
| 0.0109 | 0.0195 | COL18A1_P365_R    | 0.0100 | 0.0125 | 0.0019 | 0.0119 | 0.1461 | 0.0101 |
| 0.0000 | 0.0000 | COL1A1_P5_F       | 0.0000 | 0.0000 | 0.0000 | 0.0000 | 0.0000 | 0.0000 |
| 0.3785 | 0.1003 | COL1A2_E299_F     | 0.3244 | 0.3160 | 0.3655 | 0.2481 | 0.5229 | 0.3498 |
| 0.0000 | 0.0000 | COL1A2_P407_R     | 0.6301 | 0.0000 | 0.0671 | 0.0000 | 0.0015 | 0.0000 |
| 0.0426 | 0.0730 | COL1A2_P48_R      | 0.0245 | 0.0319 | 0.0205 | 0.0206 | 0.0189 | 0.0337 |
| 0.0000 | 0.0000 | COL4A3_E205_R     | 0.0000 | 0.2174 | 0.0481 | 0.0000 | 0.0000 | 0.0000 |
| 0.0161 | 0.7462 | COL4A3_P545_F     | 0.0391 | 0.0296 | 0.0093 | 0.7174 | 0.0297 | 0.1354 |
| 0.0161 | 0.0027 | COL6A1_P283_F     | 0.4517 | 0.3314 | 0.4911 | 0.0436 | 0.0252 | 0.0124 |
| 0.0060 | 0.2018 | COL6A1_P425_F     | 0.0093 | 0.0148 | 0.0000 | 0.0000 | 0.1036 | 0.0094 |
| 0.1109 | 0.6062 | COPG2_P298_F      | 0.1096 | 0.0419 | 0.0499 | 0.9682 | 0.7021 | 0.0378 |
| 0.0251 | 0.7051 | CPA4_P1265_R      | 0.0344 | 0.1316 | 0.0262 | 0.0412 | 0.0629 | 0.0538 |
| 0.0105 | 0.0000 | CREB1_P819_F      | 0.0044 | 0.0086 | 0.0000 | 0.0000 | 0.0147 | 0.0068 |
| 0.0104 | 0.0077 | CRIP1_P874_R      | 0.0105 | 0.0105 | 0.1069 | 0.0118 | 0.4153 | 0.0100 |
| 0.0149 | 0.0021 | CRK_P721_F        | 0.0035 | 0.0121 | 0.0079 | 0.0043 | 0.0039 | 0.0141 |

|        |        |               |        |        |        |        |        |        |
|--------|--------|---------------|--------|--------|--------|--------|--------|--------|
| 0.4713 | 0.1318 | CSF1_P217_F   | 0.3361 | 0.2583 | 0.4322 | 0.1446 | 0.4252 | 0.6678 |
| 0.0000 | 0.0000 | CSF1_P339_F   | 0.0000 | 0.0000 | 0.0984 | 0.0000 | 0.0000 | 0.0000 |
| 0.0000 | 0.0000 | CSF1R_E26_F   | 0.0000 | 0.0005 | 0.0000 | 0.0041 | 0.0025 | 0.0000 |
| 0.0283 | 0.0141 | CSF3R_P472_F  | 0.0631 | 0.0404 | 0.0794 | 0.0371 | 0.0124 | 0.0384 |
| 0.0033 | 0.0055 | CSPG2_E38_F   | 0.0040 | 0.0076 | 0.0000 | 0.0000 | 0.0000 | 0.0046 |
| 0.0039 | 0.2452 | CSPG2_P82_R   | 0.0037 | 0.0061 | 0.0000 | 0.0000 | 0.7544 | 0.0040 |
| 0.7513 | 0.0000 | CSTB_E410_F   | 0.7995 | 0.3204 | 0.7426 | 0.0052 | 0.9916 | 0.9816 |
| 0.0000 | 0.0000 | CTAG1B_P4_R   | 0.0000 | 0.3044 | 0.1413 | 0.0009 | 0.0021 | 0.0000 |
| 0.0822 | 0.2046 | CTAG1B_P77_F  | 0.3137 | 0.2088 | 0.2828 | 0.0152 | 0.9763 | 0.5957 |
| 0.0111 | 0.0300 | CTAG2_P1426_F | 0.0107 | 0.0161 | 0.0012 | 0.0230 | 0.7007 | 0.0203 |
| 0.0000 | 0.0002 | CTGF_E156_F   | 0.1965 | 0.0032 | 0.0253 | 0.7353 | 0.0032 | 0.0004 |
| 0.6979 | 0.9899 | CTLA4_P1128_F | 0.5796 | 0.4660 | 0.3911 | 0.5249 | 0.5116 | 0.2282 |
| 0.0031 | 0.0021 | CTNNA1_P185_R | 0.0956 | 0.0049 | 0.0000 | 0.0000 | 0.0051 | 0.0010 |
| 0.0037 | 0.0040 | CTNNA1_P382_R | 0.0017 | 0.0047 | 0.0134 | 0.0042 | 0.0031 | 0.0037 |
| 0.0107 | 0.0077 | CTNNB1_P757_F | 0.0068 | 0.0151 | 0.0539 | 0.0045 | 0.0043 | 0.0126 |
| 0.0000 | 0.0000 | CTSD_P726_F   | 0.0000 | 0.0000 | 0.0000 | 0.0000 | 0.0000 | 0.0000 |
| 0.0044 | 0.0073 | CTSH_P238_F   | 0.0000 | 0.0000 | 0.0000 | 0.0000 | 0.0000 | 0.0000 |
| 0.0025 | 0.0000 | CTSL_P264_R   | 0.0029 | 0.0144 | 0.0000 | 0.0043 | 0.0053 | 0.0052 |
| 0.0055 | 0.0000 | CTSL_P81_F    | 0.0033 | 0.0099 | 0.0000 | 0.0000 | 0.0063 | 0.0031 |
| 0.0104 | 0.0000 | CTTN_E29_R    | 0.0080 | 0.0064 | 0.0000 | 0.0000 | 0.0037 | 0.0052 |
| 0.0166 | 0.2021 | CYP1A1_P382_F | 0.0679 | 0.0664 | 0.0257 | 0.0236 | 0.0096 | 0.0606 |
| 0.0072 | 0.0001 | CYP2E1_P416_F | 0.0104 | 0.0375 | 0.0000 | 0.0116 | 0.0000 | 0.0106 |
| 0.0000 | 0.0000 | DAB2_P35_F    | 0.0000 | 0.0000 | 0.0000 | 0.0000 | 0.0000 | 0.0000 |
| 0.6117 | 0.0119 | DAB2_P468_F   | 0.0296 | 0.0312 | 0.0262 | 0.0092 | 0.6996 | 0.0366 |
| 0.0000 | 0.0012 | DAB2IP_P9_F   | 0.0000 | 0.0000 | 0.0000 | 0.0000 | 0.0000 | 0.0000 |
| 0.0028 | 0.0000 | DAPK1_P10_F   | 0.4021 | 0.1319 | 0.1407 | 0.0000 | 0.0000 | 0.3675 |
| 0.0000 | 0.0000 | DAPK1_P345_R  | 0.0000 | 0.0000 | 0.0478 | 0.0000 | 0.0000 | 0.0000 |
| 0.0000 | 0.0000 | DBC1_P351_R   | 0.0000 | 0.0000 | 0.0000 | 0.0008 | 0.0000 | 0.0033 |
| 0.0122 | 0.0119 | DCC_P177_F    | 0.2934 | 0.0138 | 0.1461 | 0.0109 | 0.0036 | 0.0127 |
| 0.0130 | 0.0078 | DCC_P471_R    | 0.0122 | 0.0221 | 0.0139 | 0.2367 | 0.0069 | 0.0199 |
| 0.0000 | 0.0000 | DCN_P1320_R   | 0.0000 | 0.0000 | 0.8129 | 0.0000 | 0.0000 | 0.8746 |
| 0.0000 | 0.0015 | DDB2_P407_F   | 0.6449 | 0.0000 | 0.1897 | 0.0022 | 0.0000 | 0.0000 |
| 0.0065 | 0.0031 | DDB2_P613_R   | 0.0049 | 0.0085 | 0.0000 | 0.0000 | 0.1439 | 0.0061 |

|        |        |                     |        |        |        |        |        |        |
|--------|--------|---------------------|--------|--------|--------|--------|--------|--------|
| 0.0061 | 0.0000 | DDR1_E23_R          | 0.3313 | 0.0071 | 0.0644 | 0.0000 | 0.0000 | 0.0072 |
| 0.9818 | 0.0408 | DDR2_E331_F         | 0.9783 | 0.9616 | 0.9775 | 0.9844 | 0.1436 | 0.9845 |
| 0.0068 | 0.0000 | DES_E228_R          | 0.0046 | 0.0121 | 0.0000 | 0.0000 | 0.0038 | 0.0073 |
| 0.0143 | 0.0117 | DHCR24_P406_R       | 0.5522 | 0.1501 | 0.1853 | 0.0084 | 0.0138 | 0.2608 |
| 0.0068 | 0.0018 | DIO3_E230_R         | 0.0054 | 0.0099 | 0.0604 | 0.0070 | 0.0000 | 0.6277 |
| 0.0138 | 0.9923 | DIO3_P674_F         | 0.5410 | 0.0177 | 0.4509 | 0.7095 | 0.4630 | 0.6319 |
| 0.0181 | 0.0144 | DIRAS3_E55_R        | 0.0229 | 0.0229 | 0.0242 | 0.0174 | 0.0079 | 0.0271 |
| 0.0000 | 0.0000 | DKC1_E101_F         | 0.0000 | 0.0000 | 0.1956 | 0.0000 | 0.0000 | 0.7826 |
| 0.0000 | 0.0000 | DKFZP564O0823_E45_F | 0.0029 | 0.0045 | 0.0627 | 0.0000 | 0.0045 | 0.0021 |
| 0.0041 | 0.0003 | DLC1_P88_R          | 0.1590 | 0.0000 | 0.4689 | 0.0000 | 0.0017 | 0.0000 |
| 0.9943 | 0.9499 | DLK1_E227_R         | 0.9933 | 0.9928 | 0.9918 | 0.9964 | 0.9969 | 0.9934 |
| 0.9617 | 0.8414 | DLL1_P386_F         | 0.9675 | 0.9760 | 0.9731 | 0.0000 | 0.0000 | 0.9041 |
| 0.0061 | 0.0031 | DLL1_P832_F         | 0.4154 | 0.0106 | 0.1155 | 0.0026 | 0.0014 | 0.2278 |
| 0.0188 | 0.2116 | DMP1_P134_F         | 0.2063 | 0.0614 | 0.0504 | 0.3167 | 0.4762 | 0.1412 |
| 0.0090 | 0.0116 | DNAJC15_E26_R       | 0.0064 | 0.0098 | 0.0000 | 0.5189 | 0.0726 | 0.0098 |
| 0.7552 | 0.5280 | DNASE1L1_P108_F     | 0.6409 | 0.9871 | 0.9529 | 0.9929 | 0.8158 | 0.9363 |
| 0.9786 | 0.3103 | DNMT1_P100_R        | 0.9827 | 0.9825 | 0.9819 | 0.9891 | 0.9913 | 0.9838 |
| 0.9295 | 0.0000 | DSC2_E90_F          | 0.9699 | 0.9674 | 0.9641 | 0.0000 | 0.0000 | 0.8348 |
| 0.9820 | 0.5800 | DSP_P440_R          | 0.9790 | 0.6949 | 0.9024 | 0.4497 | 0.6168 | 0.9557 |
| 0.5043 | 0.9929 | DST_E31_F           | 0.5301 | 0.2169 | 0.4665 | 0.0316 | 0.0000 | 0.3677 |
| 0.0616 | 0.0273 | DST_P262_R          | 0.0992 | 0.0677 | 0.1033 | 0.1355 | 0.9027 | 0.0687 |
| 0.0042 | 0.0000 | DUSP4_E61_F         | 0.0051 | 0.0066 | 0.0000 | 0.0033 | 0.0000 | 0.0043 |
| 0.0757 | 0.0128 | DUSP4_P925_R        | 0.4553 | 0.0261 | 0.0680 | 0.6285 | 0.0130 | 0.0286 |
| 0.6007 | 0.1040 | E2F3_P840_R         | 0.5455 | 0.5272 | 0.4067 | 0.0000 | 0.0385 | 0.0037 |
| 0.9476 | 0.9724 | E2F5_P516_R         | 0.8987 | 0.9466 | 0.9582 | 0.1065 | 0.4327 | 0.9653 |
| 0.3622 | 0.5080 | EDN1_E50_R          | 0.3212 | 0.2359 | 0.1937 | 0.5461 | 0.9842 | 0.2882 |
| 0.0292 | 0.0108 | EDN1_P39_R          | 0.0129 | 0.0305 | 0.0423 | 0.1719 | 0.4805 | 0.0328 |
| 0.9223 | 0.0000 | EDNRB_P148_R        | 0.9694 | 0.9841 | 0.9781 | 0.9876 | 0.0015 | 0.9226 |
| 0.0058 | 0.0308 | EFNA1_P591_R        | 0.3888 | 0.0137 | 0.4174 | 0.0000 | 0.0104 | 0.0000 |
| 0.0000 | 0.0000 | EFNA1_P7_F          | 0.6134 | 0.0028 | 0.9206 | 0.0017 | 0.7326 | 0.2697 |
| 0.5112 | 0.2298 | EFNB1_E69_F         | 0.5714 | 0.3026 | 0.1955 | 0.0019 | 0.0076 | 0.0044 |
| 0.0000 | 0.0032 | EFNB3_P442_R        | 0.1457 | 0.0030 | 0.0719 | 0.0000 | 0.0000 | 0.0002 |
| 0.0000 | 0.0012 | EGF_E339_F          | 0.0000 | 0.3402 | 0.5261 | 0.0000 | 0.0011 | 0.3482 |

|        |        |                |        |        |        |        |        |        |
|--------|--------|----------------|--------|--------|--------|--------|--------|--------|
| 0.5280 | 0.0040 | EGFR_E295_R    | 0.0032 | 0.1900 | 0.0786 | 0.0058 | 0.0030 | 0.0034 |
| 0.0000 | 0.0000 | EGFR_P260_R    | 0.7010 | 0.0000 | 0.7594 | 0.0000 | 0.0000 | 0.5214 |
| 0.9717 | 0.5591 | EGR4_P479_F    | 0.6471 | 0.8609 | 0.9802 | 0.9908 | 0.6392 | 0.7263 |
| 0.9790 | 0.0000 | EIF2AK2_E103_R | 0.9619 | 0.9454 | 0.9713 | 0.0000 | 0.9377 | 0.9763 |
| 0.9866 | 0.0045 | EIF2AK2_P313_F | 0.9871 | 0.9861 | 0.9864 | 0.9922 | 0.0046 | 0.9847 |
| 0.9741 | 0.0000 | ELK1_E156_F    | 0.9655 | 0.9274 | 0.9760 | 0.9870 | 0.0000 | 0.8024 |
| 0.6355 | 0.3478 | EMR3_P39_R     | 0.3183 | 0.6789 | 0.6248 | 0.0097 | 0.4740 | 0.7234 |
| 0.9843 | 0.0000 | ENC1_P484_R    | 0.9792 | 0.9807 | 0.9801 | 0.8164 | 0.0000 | 0.9804 |
| 0.3127 | 0.0183 | EPHA1_E46_R    | 0.2485 | 0.3248 | 0.3971 | 0.0228 | 0.0178 | 0.4144 |
| 0.0051 | 0.0034 | EPHA1_P119_R   | 0.0039 | 0.0067 | 0.0137 | 0.0037 | 0.0000 | 0.0061 |
| 0.0028 | 0.0000 | EPHA2_P203_F   | 0.0640 | 0.0055 | 0.1221 | 0.0018 | 0.9924 | 0.1665 |
| 0.0267 | 0.0000 | EPHA3_E156_R   | 0.0011 | 0.0022 | 0.0646 | 0.0000 | 0.0008 | 0.1353 |
| 0.6925 | 0.9443 | EPHA7_E6_F     | 0.3725 | 0.5913 | 0.5752 | 0.5644 | 0.0017 | 0.2419 |
| 0.9824 | 0.9946 | EPHA7_P205_R   | 0.9855 | 0.9868 | 0.9888 | 0.9854 | 0.9910 | 0.9842 |
| 0.0178 | 0.0204 | EPHA8_P256_F   | 0.0213 | 0.0247 | 0.0399 | 0.0255 | 0.0116 | 0.0294 |
| 0.5089 | 0.0092 | EPHB1_P503_F   | 0.0090 | 0.2422 | 0.2593 | 0.0756 | 0.0000 | 0.1657 |
| 0.0263 | 0.7993 | EPHB2_E297_F   | 0.3639 | 0.0849 | 0.0403 | 0.0746 | 0.7456 | 0.0520 |
| 0.9003 | 0.1249 | EPHB2_P165_R   | 0.9702 | 0.4617 | 0.3300 | 0.0135 | 0.0000 | 0.9766 |
| 0.0030 | 0.0000 | EPHB3_E0_F     | 0.0000 | 0.0036 | 0.1993 | 0.0000 | 0.0003 | 0.0000 |
| 0.0197 | 0.1602 | EPHB3_P569_R   | 0.0195 | 0.0176 | 0.0075 | 0.4723 | 0.0000 | 0.0218 |
| 0.0453 | 0.0083 | EPHB4_P313_R   | 0.4069 | 0.3549 | 0.4571 | 0.2680 | 0.0212 | 0.3555 |
| 0.9449 | 0.0593 | EPHB6_E342_F   | 0.2056 | 0.5648 | 0.2445 | 0.0193 | 0.6390 | 0.0579 |
| 0.0042 | 0.0000 | EPHB6_P827_R   | 0.0000 | 0.0044 | 0.0814 | 0.0000 | 0.0000 | 0.0000 |
| 0.9684 | 0.0000 | EPHX1_P1358_R  | 0.9779 | 0.9851 | 0.9769 | 0.9915 | 0.0000 | 0.9783 |
| 0.1054 | 0.7874 | EPM2A_P113_F   | 0.0426 | 0.2971 | 0.1555 | 0.8263 | 0.7651 | 0.1831 |
| 0.0244 | 0.0198 | EPM2A_P64_R    | 0.2824 | 0.0855 | 0.0120 | 0.4115 | 0.4775 | 0.0165 |
| 0.0060 | 0.0002 | EPO_E244_R     | 0.0001 | 0.0018 | 0.0000 | 0.0041 | 0.0000 | 0.0708 |
| 0.0000 | 0.0000 | EPO_P162_R     | 0.0305 | 0.5212 | 0.2316 | 0.0000 | 0.0000 | 0.3149 |
| 0.9602 | 0.1144 | EPS8_E231_F    | 0.9470 | 0.6759 | 0.9672 | 0.9913 | 0.0000 | 0.9720 |
| 0.3640 | 0.0000 | EPS8_P437_F    | 0.6368 | 0.0000 | 0.2984 | 0.0040 | 0.0000 | 0.2109 |
| 0.6812 | 0.0000 | ERBB2_P59_R    | 0.9379 | 0.9273 | 0.9245 | 0.0000 | 0.0000 | 0.9833 |
| 0.0162 | 0.0101 | ERBB3_E331_F   | 0.4767 | 0.4456 | 0.3970 | 0.0289 | 0.0101 | 0.6739 |
| 0.0105 | 0.0500 | ERBB3_P870_R   | 0.1807 | 0.3752 | 0.2054 | 0.0040 | 0.0979 | 0.2243 |



|        |        |               |        |        |        |        |        |        |
|--------|--------|---------------|--------|--------|--------|--------|--------|--------|
| 0.0142 | 0.3795 | ERBB4_P255_F  | 0.0172 | 0.0229 | 0.1336 | 0.6466 | 0.2276 | 0.0153 |
| 0.9133 | 0.0000 | ERBB4_P541_F  | 0.9398 | 0.8825 | 0.9395 | 0.0874 | 0.9925 | 0.9135 |
| 0.4046 | 0.7003 | ERCC1_P354_F  | 0.5963 | 0.7223 | 0.8744 | 0.9240 | 0.0000 | 0.8247 |
| 0.7438 | 0.2339 | ERCC3_P1210_R | 0.8349 | 0.6987 | 0.7899 | 0.0306 | 0.9933 | 0.7161 |
| 0.4422 | 0.0157 | ERG_E28_F     | 0.3591 | 0.4800 | 0.3927 | 0.0248 | 0.0324 | 0.1225 |
| 0.9286 | 0.1362 | ERN1_P809_R   | 0.9738 | 0.9768 | 0.9749 | 0.1953 | 0.0000 | 0.9817 |
| 0.9792 | 0.7382 | ESR1_E298_R   | 0.8809 | 0.9768 | 0.9666 | 0.0342 | 0.7111 | 0.8790 |
| 0.8560 | 0.9923 | ESR1_P151_R   | 0.8038 | 0.4495 | 0.6844 | 0.0028 | 0.0039 | 0.6834 |
| 0.8514 | 0.4218 | ESR2_E66_F    | 0.4214 | 0.5031 | 0.5503 | 0.0487 | 0.0309 | 0.5994 |
| 0.4143 | 0.9800 | ESR2_P162_F   | 0.0314 | 0.1723 | 0.1576 | 0.0319 | 0.5218 | 0.4277 |
| 0.1639 | 0.0503 | ETS1_E253_R   | 0.6898 | 0.0495 | 0.3234 | 0.1596 | 0.2387 | 0.5538 |
| 0.9797 | 0.0000 | ETS1_P559_R   | 0.9767 | 0.9818 | 0.9793 | 0.0000 | 0.0420 | 0.9822 |
| 0.6428 | 0.3406 | ETS2_P684_F   | 0.7446 | 0.7085 | 0.9716 | 0.9900 | 0.9923 | 0.9798 |
| 0.0140 | 0.1346 | ETS2_P835_F   | 0.0109 | 0.1446 | 0.1521 | 0.0109 | 0.0000 | 0.0116 |
| 0.9600 | 0.9931 | ETV1_P235_F   | 0.9773 | 0.9766 | 0.9735 | 0.0000 | 0.0000 | 0.9745 |
| 0.0063 | 0.0000 | ETV1_P515_F   | 0.6748 | 0.0173 | 0.0000 | 0.1423 | 0.0000 | 0.0114 |
| 0.2635 | 0.0046 | ETV6_E430_F   | 0.4959 | 0.4884 | 0.3328 | 0.0089 | 0.0059 | 0.3542 |
| 0.9496 | 0.1453 | EVI1_E47_R    | 0.6351 | 0.9309 | 0.9661 | 0.3169 | 0.9880 | 0.4603 |
| 0.0028 | 0.0000 | EVI1_P30_R    | 0.4542 | 0.0061 | 0.1925 | 0.0036 | 0.0000 | 0.2157 |
| 0.0056 | 0.0000 | EVI2A_P94_R   | 0.0044 | 0.0055 | 0.3434 | 0.0000 | 0.0000 | 0.4294 |
| 0.0441 | 0.3314 | EXT1_E197_F   | 0.2570 | 0.0239 | 0.1253 | 0.0126 | 0.5846 | 0.0166 |
| 0.3221 | 0.8913 | EYA4_E277_F   | 0.0058 | 0.1988 | 0.0592 | 0.0447 | 0.0085 | 0.4499 |
| 0.1841 | 0.0000 | EYA4_P508_F   | 0.8178 | 0.6163 | 0.6035 | 0.0057 | 0.0024 | 0.7119 |
| 0.9620 | 0.0000 | EYA4_P794_F   | 0.9435 | 0.9693 | 0.9567 | 0.0000 | 0.0000 | 0.9835 |
| 0.9829 | 0.0000 | F2R_P839_F    | 0.9786 | 0.9833 | 0.9806 | 0.0000 | 0.0000 | 0.9485 |
| 0.4713 | 0.2160 | F2R_P88_F     | 0.8075 | 0.8599 | 0.8780 | 0.0037 | 0.0037 | 0.5570 |
| 0.4737 | 0.8028 | FABP3_E113_F  | 0.5308 | 0.6035 | 0.6342 | 0.0731 | 0.0059 | 0.7402 |
| 0.2085 | 0.9851 | FABP3_P598_F  | 0.1141 | 0.1633 | 0.3215 | 0.3371 | 0.3487 | 0.1497 |
| 0.7997 | 0.0004 | FANCE_P356_R  | 0.8228 | 0.0089 | 0.7316 | 0.0000 | 0.0016 | 0.0063 |
| 0.5508 | 0.6504 | FANCF_P13_F   | 0.2066 | 0.5926 | 0.6155 | 0.6969 | 0.0184 | 0.6388 |
| 0.0533 | 0.0624 | FANCG_E207_R  | 0.0341 | 0.4996 | 0.1738 | 0.1746 | 0.0744 | 0.5556 |
| 0.9619 | 0.5974 | FAS_P322_R    | 0.6138 | 0.8311 | 0.8008 | 0.6559 | 0.8258 | 0.6962 |
| 0.0279 | 0.0911 | FASTK_P257_F  | 0.5727 | 0.0614 | 0.7464 | 0.6001 | 0.0156 | 0.0526 |

|        |        |               |        |        |        |        |        |        |
|--------|--------|---------------|--------|--------|--------|--------|--------|--------|
| 0.2275 | 0.0000 | FAT_P973_R    | 0.4450 | 0.0047 | 0.3600 | 0.0102 | 0.0000 | 0.5232 |
| 0.9833 | 0.2604 | FER_P581_F    | 0.7200 | 0.9546 | 0.9599 | 0.2316 | 0.3431 | 0.9722 |
| 0.9795 | 0.0000 | FES_P223_R    | 0.9731 | 0.9634 | 0.9690 | 0.0000 | 0.0000 | 0.9659 |
| 0.9407 | 0.8407 | FGF1_E5_F     | 0.9770 | 0.9578 | 0.9793 | 0.0473 | 0.3868 | 0.9822 |
| 0.0127 | 0.4228 | FGF12_E61_R   | 0.4139 | 0.5039 | 0.2651 | 0.3393 | 0.4465 | 0.0712 |
| 0.9817 | 0.8158 | FGF12_P210_R  | 0.9821 | 0.9737 | 0.9836 | 0.9800 | 0.9913 | 0.9849 |
| 0.6432 | 0.2371 | FGF2_P153_F   | 0.0290 | 0.0395 | 0.4549 | 0.0120 | 0.0107 | 0.1963 |
| 0.7549 | 0.0417 | FGF2_P229_F   | 0.1680 | 0.1005 | 0.6056 | 0.9059 | 0.6173 | 0.0535 |
| 0.9640 | 0.9870 | FGF3_E198_R   | 0.7675 | 0.3906 | 0.4163 | 0.9846 | 0.9872 | 0.8631 |
| 0.7341 | 0.0001 | FGF3_P171_R   | 0.7655 | 0.8050 | 0.9497 | 0.0000 | 0.0000 | 0.9772 |
| 0.8725 | 0.9912 | FGF5_E16_F    | 0.9609 | 0.9809 | 0.9768 | 0.7054 | 0.0572 | 0.9805 |
| 0.0849 | 0.9933 | FGF5_P238_R   | 0.4301 | 0.5875 | 0.4368 | 0.0000 | 0.9912 | 0.5694 |
| 0.6547 | 0.7153 | FGF6_E294_F   | 0.1009 | 0.0429 | 0.6129 | 0.7399 | 0.6776 | 0.0528 |
| 0.3202 | 0.0000 | FGF7_P44_F    | 0.5587 | 0.0022 | 0.6330 | 0.0002 | 0.9865 | 0.5520 |
| 0.1543 | 0.0056 | FGF8_E183_F   | 0.0245 | 0.0295 | 0.0000 | 0.0000 | 0.3362 | 0.2802 |
| 0.5665 | 0.0000 | FGF8_P473_F   | 0.9247 | 0.4944 | 0.5042 | 0.0000 | 0.0000 | 0.4552 |
| 0.2789 | 0.0000 | FGFR1_E317_F  | 0.0079 | 0.2038 | 0.3565 | 0.2374 | 0.0083 | 0.7159 |
| 0.0096 | 0.0073 | FGFR2_P266_R  | 0.0085 | 0.1248 | 0.0171 | 0.0065 | 0.0072 | 0.1421 |
| 0.9686 | 0.9900 | FGFR3_E297_R  | 0.9601 | 0.9037 | 0.8731 | 0.0000 | 0.7883 | 0.8227 |
| 0.9777 | 0.8352 | FGFR3_P1152_R | 0.9615 | 0.9024 | 0.9162 | 0.8729 | 0.9951 | 0.9397 |
| 0.9830 | 0.0019 | FHIT_E19_R    | 0.9817 | 0.9725 | 0.9795 | 0.9928 | 0.9911 | 0.9789 |
| 0.7139 | 0.0000 | FHIT_P93_R    | 0.1663 | 0.1391 | 0.1983 | 0.0045 | 0.0035 | 0.0075 |
| 0.0018 | 0.0004 | FHL1_E229_R   | 0.4213 | 0.1998 | 0.2231 | 0.0031 | 0.0000 | 0.0000 |
| 0.9446 | 0.0610 | FLI1_P620_R   | 0.8871 | 0.9185 | 0.9652 | 0.0000 | 0.0039 | 0.9656 |
| 0.1117 | 0.8931 | FLT1_E444_F   | 0.3085 | 0.6289 | 0.7157 | 0.0250 | 0.0198 | 0.5292 |
| 0.0262 | 0.2229 | FLT1_P302_F   | 0.1990 | 0.0465 | 0.0503 | 0.0190 | 0.5301 | 0.0445 |
| 0.0046 | 0.0133 | FLT1_P615_R   | 0.0033 | 0.1895 | 0.2729 | 0.0077 | 0.4221 | 0.5761 |
| 0.4740 | 0.0138 | FLT3_E326_R   | 0.1718 | 0.3920 | 0.1343 | 0.0070 | 0.0043 | 0.3767 |
| 0.9859 | 0.8749 | FLT4_P180_R   | 0.9840 | 0.9835 | 0.9810 | 0.9789 | 0.9928 | 0.9238 |
| 0.5261 | 0.9218 | FMR1_P62_R    | 0.2654 | 0.3103 | 0.2351 | 0.5127 | 0.9388 | 0.2761 |
| 0.0031 | 0.0000 | FN1_E469_F    | 0.1824 | 0.6317 | 0.2576 | 0.0000 | 0.0000 | 0.0009 |
| 0.3828 | 0.3199 | FN1_P229_R    | 0.2327 | 0.4065 | 0.1918 | 0.0127 | 0.5883 | 0.9053 |
| 0.6939 | 0.0003 | FOSL2_E384_R  | 0.8281 | 0.9510 | 0.9854 | 0.0044 | 0.9929 | 0.8960 |

|        |                       |        |        |        |        |        |        |
|--------|-----------------------|--------|--------|--------|--------|--------|--------|
| 0.0110 | 0.0075 FRK_P36_F      | 0.3124 | 0.0195 | 0.1236 | 0.2076 | 0.0000 | 0.2121 |
| 0.7267 | 0.1252 FRZB_E186_R    | 0.0000 | 0.9667 | 0.9116 | 0.9739 | 0.0000 | 0.8724 |
| 0.5991 | 0.0000 FRZB_P406_F    | 0.0008 | 0.2127 | 0.1344 | 0.0042 | 0.0000 | 0.0000 |
| 0.0196 | 0.0000 FVT1_P225_F    | 0.3295 | 0.2463 | 0.1667 | 0.0061 | 0.3587 | 0.0084 |
| 0.9312 | 0.9909 FYN_P352_R     | 0.9735 | 0.8635 | 0.7988 | 0.9945 | 0.9945 | 0.3916 |
| 0.0000 | 0.9931 FZD7_E296_F    | 0.9774 | 0.9848 | 0.9770 | 0.0289 | 0.0000 | 0.9811 |
| 0.9756 | 0.9741 FZD9_E458_F    | 0.9791 | 0.9749 | 0.9690 | 0.0000 | 0.9928 | 0.9703 |
| 0.0024 | 0.0072 FZD9_P15_R     | 0.0000 | 0.0010 | 0.0346 | 0.0000 | 0.0045 | 0.0002 |
| 0.2465 | 0.2639 FZD9_P175_F    | 0.3781 | 0.4956 | 0.4073 | 0.0839 | 0.9910 | 0.2200 |
| 0.0000 | 0.0017 G6PD_E190_F    | 0.3625 | 0.4127 | 0.8021 | 0.9909 | 0.0024 | 0.0000 |
| 0.0147 | 0.0106 G6PD_P196_F    | 0.5144 | 0.2542 | 0.7262 | 0.6585 | 0.5156 | 0.3832 |
| 0.0022 | 0.0028 GABRB3_E42_F   | 0.2922 | 0.0044 | 0.0000 | 0.0063 | 0.0000 | 0.4369 |
| 0.0243 | 0.3865 GADD45A_P737_R | 0.1365 | 0.1606 | 0.1507 | 0.4138 | 0.0202 | 0.0249 |
| 0.0184 | 0.1919 GALR1_E52_F    | 0.0163 | 0.0152 | 0.0070 | 0.0088 | 0.0000 | 0.0215 |
| 0.0086 | 0.0040 GALR1_P80_F    | 0.0082 | 0.2176 | 0.0260 | 0.9874 | 0.0000 | 0.1626 |
| 0.0078 | 0.3083 GAS1_E22_F     | 0.0068 | 0.1861 | 0.0014 | 0.0467 | 0.0066 | 0.0102 |
| 0.0017 | 0.0031 GAS1_P754_R    | 0.0000 | 0.0028 | 0.0198 | 0.0028 | 0.0000 | 0.0000 |
| 0.0120 | 0.3219 GAS7_E148_F    | 0.8467 | 0.0149 | 0.0470 | 0.0165 | 0.0094 | 0.0108 |
| 0.0000 | 0.0000 GAS7_P622_R    | 0.0000 | 0.0354 | 0.0000 | 0.0000 | 0.0000 | 0.0000 |
| 0.4748 | 0.0045 GATA6_P21_R    | 0.0045 | 0.1280 | 0.0673 | 0.0020 | 0.0024 | 0.1559 |
| 0.0175 | 0.0068 GATA6_P726_F   | 0.0120 | 0.0126 | 0.0053 | 0.1656 | 0.0051 | 0.0297 |
| 0.0038 | 0.0750 GFI1_E136_F    | 0.0021 | 0.0052 | 0.1099 | 0.0293 | 0.0000 | 0.0039 |
| 0.0088 | 0.0039 GFI1_P45_R     | 0.0064 | 0.0547 | 0.0289 | 0.0018 | 0.0056 | 0.0500 |
| 0.0136 | 0.0064 GJB2_E43_F     | 0.0083 | 0.0182 | 0.1454 | 0.0000 | 0.0000 | 0.0139 |
| 0.5015 | 0.1493 GJB2_P791_R    | 0.2802 | 0.1377 | 0.1052 | 0.0132 | 0.0059 | 0.0088 |
| 0.0416 | 0.2777 GJB2_P931_R    | 0.7675 | 0.0369 | 0.1029 | 0.2741 | 0.3366 | 0.0311 |
| 0.0204 | 0.0050 GLA_P112_F     | 0.9289 | 0.3793 | 0.8948 | 0.8351 | 0.4490 | 0.1763 |
| 0.9815 | 0.0000 GLI2_E90_F     | 0.9720 | 0.9788 | 0.9800 | 0.9912 | 0.0000 | 0.9841 |
| 0.8236 | 0.6182 GLI3_E148_R    | 0.9027 | 0.7918 | 0.9263 | 0.9678 | 0.2995 | 0.8221 |
| 0.9791 | 0.8038 GML_P281_R     | 0.8775 | 0.9827 | 0.9734 | 0.9906 | 0.6402 | 0.9815 |
| 0.9800 | 0.0000 GNAS_E58_F     | 0.8566 | 0.8676 | 0.8855 | 0.0000 | 0.0000 | 0.4482 |
| 0.0136 | 0.0030 GP1BB_E23_F    | 0.0082 | 0.0664 | 0.0669 | 0.0500 | 0.0040 | 0.0082 |
| 0.1598 | 0.0000 GPC3_P235_R    | 0.5700 | 0.0046 | 0.5937 | 0.0033 | 0.0000 | 0.0068 |

|        |        |                     |        |        |        |        |        |        |
|--------|--------|---------------------|--------|--------|--------|--------|--------|--------|
| 0.9790 | 0.0000 | GPR116_E328_R       | 0.9864 | 0.9868 | 0.9840 | 0.9923 | 0.9799 | 0.9863 |
| 0.0092 | 0.0926 | GPX1_E46_R          | 0.0088 | 0.0102 | 0.0003 | 0.0061 | 0.2641 | 0.0092 |
| 0.0483 | 0.5512 | GPX1_P194_F         | 0.0193 | 0.0274 | 0.0777 | 0.4630 | 0.0257 | 0.0281 |
| 0.0915 | 0.0105 | GPX3_E178_F         | 0.1375 | 0.3278 | 0.2431 | 0.0075 | 0.0092 | 0.2234 |
| 0.0057 | 0.0886 | GRB10_E85_R         | 0.0077 | 0.0073 | 0.0000 | 0.0054 | 0.0042 | 0.0052 |
| 0.0032 | 0.0045 | GRB10_P260_F        | 0.0020 | 0.0144 | 0.0000 | 0.0857 | 0.1329 | 0.0058 |
| 0.0042 | 0.0905 | GRB10_P496_R        | 0.0046 | 0.2809 | 0.1885 | 0.0086 | 0.0000 | 0.8290 |
| 0.9817 | 0.1442 | GRPR_P200_R         | 0.9378 | 0.8434 | 0.9296 | 0.1665 | 0.9925 | 0.9811 |
| 0.9431 | 0.9908 | GSTM1_P363_F        | 0.8647 | 0.9355 | 0.8053 | 0.9914 | 0.1561 | 0.5734 |
| 0.0044 | 0.6247 | GSTM2_E153_F        | 0.0045 | 0.0062 | 0.0268 | 0.1100 | 0.0011 | 0.1922 |
| 0.0030 | 0.0000 | GSTM2_P109_R        | 0.0000 | 0.0081 | 0.0203 | 0.0031 | 0.0000 | 0.2922 |
| 0.0000 | 0.0016 | GSTM2_P453_R        | 0.0009 | 0.5901 | 0.6631 | 0.0000 | 0.0000 | 0.8519 |
| 0.0073 | 0.0000 | GSTP1_E322_R        | 0.0058 | 0.0063 | 0.0000 | 0.0007 | 0.0000 | 0.0076 |
| 0.0193 | 0.3359 | GSTP1_P74_F         | 0.0291 | 0.0494 | 0.0661 | 0.2060 | 0.4374 | 0.0315 |
| 0.0077 | 0.0000 | GSTP1_seq_38_S153_R | 0.0072 | 0.0092 | 0.0005 | 0.0000 | 0.0000 | 0.0095 |
| 0.0041 | 0.0000 | GUCY2D_E419_R       | 0.0069 | 0.0072 | 0.0000 | 0.0001 | 0.0040 | 0.0038 |
| 0.0000 | 0.0000 | HBEGF_P32_R         | 0.0000 | 0.0000 | 0.0348 | 0.0000 | 0.0000 | 0.0006 |
| 0.9747 | 0.0000 | HBII-13_E48_F       | 0.9626 | 0.9657 | 0.9705 | 0.9853 | 0.0000 | 0.9600 |
| 0.0405 | 0.5549 | HBII-52_P563_F      | 0.8253 | 0.6689 | 0.8742 | 0.9888 | 0.0242 | 0.7150 |
| 0.0132 | 0.2967 | HCK_P46_R           | 0.0088 | 0.1921 | 0.0137 | 0.0073 | 0.0087 | 0.0107 |
| 0.0165 | 0.5826 | HCK_P858_F          | 0.0162 | 0.0200 | 0.1128 | 0.0308 | 0.0448 | 0.0198 |
| 0.0093 | 0.0066 | HDAC1_P414_R        | 0.6869 | 0.4060 | 0.2645 | 0.0000 | 0.4955 | 0.0598 |
| 0.0000 | 0.0061 | HDAC11_P556_F       | 0.0017 | 0.0000 | 0.0041 | 0.0043 | 0.0032 | 0.0637 |
| 0.0016 | 0.0010 | HDAC9_P137_R        | 0.0000 | 0.0041 | 0.0761 | 0.0000 | 0.0072 | 0.0054 |
| 0.0014 | 0.0044 | HFE_E273_R          | 0.0011 | 0.0040 | 0.0000 | 0.0037 | 0.0033 | 0.0000 |
| 0.0209 | 0.1777 | HHIP_P307_R         | 0.0239 | 0.0769 | 0.0506 | 0.0205 | 0.0104 | 0.0849 |
| 0.9229 | 0.0000 | HIC1_E151_F         | 0.0000 | 0.0000 | 0.0581 | 0.0000 | 0.0000 | 0.0000 |
| 0.0235 | 0.0128 | HIC1_P565_R         | 0.0158 | 0.0191 | 0.0042 | 0.0081 | 0.0000 | 0.0220 |
| 0.0053 | 0.0040 | HIC2_P498_F         | 0.0044 | 0.0057 | 0.0000 | 0.0000 | 0.0041 | 0.0058 |
| 0.0590 | 0.0071 | HIC2_P528_R         | 0.0043 | 0.0110 | 0.0000 | 0.0035 | 0.0000 | 0.0052 |
| 0.0000 | 0.0086 | HIF1A_P488_F        | 0.0019 | 0.0000 | 0.0000 | 0.0064 | 0.0000 | 0.0026 |
| 0.9836 | 0.0000 | HLA-DOB_P357_R      | 0.9825 | 0.9715 | 0.9756 | 0.9754 | 0.0000 | 0.9748 |
| 0.0157 | 0.1568 | HLA-DPA1_P205_R     | 0.6511 | 0.0177 | 0.0686 | 0.1164 | 0.1035 | 0.0110 |

|        |        |                 |        |        |        |        |        |        |
|--------|--------|-----------------|--------|--------|--------|--------|--------|--------|
| 0.0042 | 0.0243 | HLA-DPA1_P28_R  | 0.0031 | 0.0071 | 0.0744 | 0.0049 | 0.0000 | 0.0052 |
| 0.0401 | 0.5597 | HLA-DPB1_E2_R   | 0.0368 | 0.0815 | 0.0210 | 0.2183 | 0.0000 | 0.0667 |
| 0.0000 | 0.0000 | HLA-DRA_P132_R  | 0.0000 | 0.0000 | 0.0413 | 0.0000 | 0.0000 | 0.0000 |
| 0.0000 | 0.0000 | HLA-F_E402_F    | 0.0000 | 0.0000 | 0.0000 | 0.0000 | 0.0000 | 0.0000 |
| 0.0173 | 0.0285 | HLF_E192_F      | 0.0144 | 0.0167 | 0.0084 | 0.0294 | 0.7702 | 0.0191 |
| 0.0028 | 0.0000 | HOXA11_E35_F    | 0.0032 | 0.0043 | 0.0000 | 0.0000 | 0.0000 | 0.0023 |
| 0.0238 | 0.5713 | HOXA11_P698_F   | 0.0243 | 0.0222 | 0.0088 | 0.0196 | 0.0113 | 0.0200 |
| 0.9831 | 0.0000 | HOXA5_E187_F    | 0.9664 | 0.9832 | 0.9795 | 0.9900 | 0.5594 | 0.9760 |
| 0.0114 | 0.0000 | HOXA9_E252_R    | 0.0142 | 0.0256 | 0.0733 | 0.2450 | 0.0000 | 0.0268 |
| 0.0794 | 0.1646 | HOXA9_P1141_R   | 0.2787 | 0.1845 | 0.0179 | 0.0078 | 0.3624 | 0.0190 |
| 0.0010 | 0.0000 | HOXA9_P303_F    | 0.0000 | 0.0007 | 0.0000 | 0.0012 | 0.0000 | 0.0000 |
| 0.3867 | 0.0037 | HOXB13_E21_F    | 0.0746 | 0.0685 | 0.0326 | 0.0044 | 0.0020 | 0.0024 |
| 0.0041 | 0.0000 | HOXB13_P17_R    | 0.0023 | 0.1552 | 0.0920 | 0.0008 | 0.0010 | 0.3144 |
| 0.0285 | 0.0734 | HOXC6_P456_R    | 0.0271 | 0.0464 | 0.0495 | 0.0290 | 0.7854 | 0.0377 |
| 0.0061 | 0.0000 | HPN_P374_R      | 0.0000 | 0.0039 | 0.0451 | 0.0000 | 0.0000 | 0.0027 |
| 0.0000 | 0.9919 | HPN_P823_F      | 0.6024 | 0.0000 | 0.4197 | 0.0000 | 0.0000 | 0.0000 |
| 0.0211 | 0.5087 | HPSE_P29_F      | 0.3606 | 0.0270 | 0.0328 | 0.0260 | 0.7187 | 0.0258 |
| 0.0036 | 0.0029 | HPSE_P93_F      | 0.0050 | 0.0055 | 0.0000 | 0.0057 | 0.0000 | 0.0044 |
| 0.0011 | 0.0000 | HRASLS_E72_R    | 0.0000 | 0.0007 | 0.0883 | 0.0000 | 0.0000 | 0.0000 |
| 0.0000 | 0.0018 | HS3ST2_E145_R   | 0.0000 | 0.0000 | 0.0330 | 0.0000 | 0.0026 | 0.0000 |
| 0.1824 | 0.0046 | HS3ST2_P546_F   | 0.3322 | 0.7274 | 0.0251 | 0.0000 | 0.0050 | 0.0028 |
| 0.0594 | 0.4124 | HSD17B12_E145_R | 0.0152 | 0.0194 | 0.0117 | 0.0000 | 0.0128 | 0.0194 |
| 0.0000 | 0.0008 | HTR1B_P222_F    | 0.0004 | 0.0006 | 0.0000 | 0.0000 | 0.0000 | 0.4503 |
| 0.0011 | 0.0046 | HTR2A_P853_F    | 0.0010 | 0.0015 | 0.1442 | 0.9871 | 0.0069 | 0.0000 |
| 0.1214 | 0.9858 | IAPP_E280_F     | 0.9775 | 0.9749 | 0.9774 | 0.9881 | 0.9906 | 0.9749 |
| 0.0000 | 0.0000 | ICA1_P61_F      | 0.0000 | 0.0000 | 0.0000 | 0.0000 | 0.0028 | 0.0000 |
| 0.0000 | 0.0008 | ICA1_P72_R      | 0.0000 | 0.0019 | 0.0292 | 0.0000 | 0.0012 | 0.0016 |
| 0.0109 | 0.3173 | ICAM1_E242_F    | 0.0115 | 0.0183 | 0.0592 | 0.3415 | 0.0042 | 0.4373 |
| 0.0000 | 0.0000 | ICAM1_P119_R    | 0.0005 | 0.0037 | 0.0000 | 0.0031 | 0.0048 | 0.0000 |
| 0.0000 | 0.0006 | ICAM1_P386_R    | 0.0000 | 0.0030 | 0.0000 | 0.0000 | 0.0033 | 0.0000 |
| 0.0040 | 0.0007 | ID1_P659_R      | 0.0047 | 0.0054 | 0.0239 | 0.0000 | 0.0003 | 0.0000 |
| 0.8125 | 0.0075 | IFNG_P459_R     | 0.9384 | 0.9720 | 0.9775 | 0.2222 | 0.0058 | 0.7642 |
| 0.2424 | 0.1326 | IFNGR1_P307_F   | 0.0073 | 0.0137 | 0.0051 | 0.1404 | 0.5449 | 0.0040 |

|        |        |                |        |        |        |        |        |        |
|--------|--------|----------------|--------|--------|--------|--------|--------|--------|
| 0.0343 | 0.1139 | IFNGR2_E164_F  | 0.0320 | 0.0251 | 0.0274 | 0.0217 | 0.1178 | 0.0465 |
| 0.7763 | 0.0000 | IFNGR2_P377_R  | 0.4460 | 0.0018 | 0.2198 | 0.0010 | 0.9134 | 0.0000 |
| 0.9063 | 0.0000 | IGF1_E394_F    | 0.9719 | 0.8477 | 0.9682 | 0.0000 | 0.0000 | 0.9759 |
| 0.7458 | 0.0000 | IGF1_P933_F    | 0.9760 | 0.5342 | 0.7897 | 0.0000 | 0.0833 | 0.9536 |
| 0.0021 | 0.0015 | IGF1R_E186_R   | 0.0000 | 0.0033 | 0.0000 | 0.0007 | 0.0019 | 0.0036 |
| 0.0285 | 0.2742 | IGF1R_P325_R   | 0.0121 | 0.0179 | 0.0061 | 0.0122 | 0.1257 | 0.0226 |
| 0.0000 | 0.0000 | IGF2_E134_R    | 0.0037 | 0.5059 | 0.1337 | 0.0014 | 0.0000 | 0.0000 |
| 0.0212 | 0.0145 | IGF2_P1036_R   | 0.0319 | 0.1218 | 0.0132 | 0.1241 | 0.0076 | 0.0198 |
| 0.0146 | 0.0688 | IGF2_P36_R     | 0.0131 | 0.0174 | 0.3727 | 0.0097 | 0.2368 | 0.0214 |
| 0.0000 | 0.0000 | IGF2AS_P203_F  | 0.0000 | 0.0000 | 0.0000 | 0.0000 | 0.0000 | 0.0000 |
| 0.1313 | 0.9197 | IGF2R_P396_R   | 0.0998 | 0.1456 | 0.1063 | 0.9259 | 0.1961 | 0.2345 |
| 0.9820 | 0.0682 | IGFBP1_E48_R   | 0.6475 | 0.1999 | 0.1865 | 0.0162 | 0.0000 | 0.4754 |
| 0.9065 | 0.0344 | IGFBP1_P12_R   | 0.0055 | 0.7070 | 0.4647 | 0.1851 | 0.0266 | 0.8408 |
| 0.0000 | 0.0008 | IGFBP2_P306_F  | 0.0000 | 0.0000 | 0.0535 | 0.0000 | 0.0000 | 0.0000 |
| 0.0295 | 0.0108 | IGFBP3_E65_R   | 0.0140 | 0.0251 | 0.0679 | 0.0125 | 0.1922 | 0.0179 |
| 0.0068 | 0.0000 | IGFBP3_P1035_F | 0.0000 | 0.0000 | 0.0000 | 0.0000 | 0.0036 | 0.0000 |
| 0.0173 | 0.1522 | IGFBP3_P423_R  | 0.0117 | 0.0159 | 0.0267 | 0.0039 | 0.0049 | 0.2386 |
| 0.0076 | 0.4008 | IGFBP7_P371_F  | 0.0056 | 0.0083 | 0.0000 | 0.1318 | 0.3860 | 0.0092 |
| 0.0077 | 0.0321 | IGSF4_P454_F   | 0.0051 | 0.0075 | 0.0000 | 0.0048 | 0.0020 | 0.0011 |
| 0.0214 | 0.1842 | IGSF4_P86_R    | 0.0142 | 0.0329 | 0.0105 | 0.0880 | 0.0077 | 0.0156 |
| 0.9853 | 0.0039 | IGSF4C_E65_F   | 0.9829 | 0.9559 | 0.8668 | 0.0948 | 0.7547 | 0.8607 |
| 0.0050 | 0.0136 | IGSF4C_P533_R  | 0.0065 | 0.0134 | 0.0054 | 0.0109 | 0.0000 | 0.0102 |
| 0.0035 | 0.0017 | IHH_E186_F     | 0.0019 | 0.0082 | 0.0000 | 0.0000 | 0.0000 | 0.0012 |
| 0.0341 | 0.0071 | IHH_P246_R     | 0.3172 | 0.2915 | 0.1561 | 0.0000 | 0.0074 | 0.0049 |
| 0.0137 | 0.1404 | IHH_P529_F     | 0.0166 | 0.0138 | 0.0034 | 0.0000 | 0.1175 | 0.0069 |
| 0.0010 | 0.0000 | IL10_P85_F     | 0.2069 | 0.0026 | 0.0713 | 0.0000 | 0.0000 | 0.1431 |
| 0.0000 | 0.0000 | IL11_P11_R     | 0.0072 | 0.5281 | 0.1040 | 0.0000 | 0.0000 | 0.0086 |
| 0.0014 | 0.0024 | IL12A_E287_R   | 0.0044 | 0.0054 | 0.0189 | 0.0025 | 0.0000 | 0.0027 |
| 0.0000 | 0.5443 | IL12B_P392_R   | 0.1985 | 0.1754 | 0.7588 | 0.0016 | 0.2091 | 0.7410 |
| 0.9789 | 0.9586 | IL13_E75_R     | 0.9764 | 0.9586 | 0.9821 | 0.1559 | 0.0421 | 0.9809 |
| 0.0047 | 0.0015 | IL17RB_E164_R  | 0.0007 | 0.0030 | 0.0643 | 0.0020 | 0.0029 | 0.0000 |
| 0.0000 | 0.0000 | IL17RB_P788_R  | 0.0000 | 0.0000 | 0.0000 | 0.0000 | 0.0000 | 0.0000 |
| 0.0299 | 0.2332 | IL18BP_P51_R   | 0.0305 | 0.0346 | 0.0246 | 0.0180 | 0.3717 | 0.0411 |

|        |        |               |        |        |        |        |        |        |
|--------|--------|---------------|--------|--------|--------|--------|--------|--------|
| 0.9721 | 0.9916 | IL1A_E113_R   | 0.9852 | 0.9876 | 0.9725 | 0.9890 | 0.9915 | 0.9854 |
| 0.8583 | 0.9889 | IL1RN_E42_F   | 0.9485 | 0.9870 | 0.9837 | 0.9862 | 0.0000 | 0.9764 |
| 0.9787 | 0.0000 | IL3_P556_F    | 0.9755 | 0.9148 | 0.9753 | 0.1976 | 0.0000 | 0.9706 |
| 0.3873 | 0.0078 | IL6_E168_F    | 0.0066 | 0.4279 | 0.2542 | 0.0974 | 0.0513 | 0.5395 |
| 0.0000 | 0.0006 | IL8_E118_R    | 0.0026 | 0.0042 | 0.0378 | 0.0031 | 0.0000 | 0.0015 |
| 0.0000 | 0.0000 | IL8_P83_F     | 0.0000 | 0.0000 | 0.0000 | 0.0000 | 0.0000 | 0.0000 |
| 0.0000 | 0.0000 | IMPACT_P186_F | 0.0000 | 0.0000 | 0.0000 | 0.0000 | 0.0000 | 0.0000 |
| 0.0000 | 0.0018 | IMPACT_P234_R | 0.0028 | 0.0081 | 0.0000 | 0.0000 | 0.0000 | 0.0025 |
| 0.4867 | 0.0046 | INSR_P1063_R  | 0.0000 | 0.4436 | 0.1370 | 0.0000 | 0.0019 | 0.0000 |
| 0.0000 | 0.0023 | IPF1_P234_F   | 0.0030 | 0.0034 | 0.1127 | 0.0003 | 0.0000 | 0.0037 |
| 0.6021 | 0.0638 | IRAK1_P455_R  | 0.6239 | 0.0083 | 0.3828 | 0.0070 | 0.0019 | 0.0080 |
| 0.0089 | 0.0101 | IRAK3_E130_F  | 0.0086 | 0.0126 | 0.0020 | 0.0000 | 0.0051 | 0.0105 |
| 0.0000 | 0.0053 | IRAK3_P13_F   | 0.0098 | 0.0105 | 0.0000 | 0.0200 | 0.0000 | 0.0065 |
| 0.0092 | 0.0000 | IRF5_P123_F   | 0.0178 | 0.1057 | 0.0883 | 0.0000 | 0.0054 | 0.2104 |
| 0.1263 | 0.0098 | IRF7_P277_R   | 0.0084 | 0.0106 | 0.0031 | 0.0143 | 0.6154 | 0.1062 |
| 0.0084 | 0.0000 | ISL1_E87_R    | 0.3019 | 0.0058 | 0.0608 | 0.0032 | 0.0000 | 0.1843 |
| 0.1349 | 0.0000 | ISL1_P379_F   | 0.1437 | 0.0132 | 0.1374 | 0.0000 | 0.0006 | 0.0050 |
| 0.9615 | 0.0000 | ISL1_P554_F   | 0.0000 | 0.0000 | 0.0000 | 0.6363 | 0.0000 | 0.0000 |
| 0.0083 | 0.2109 | ITGA2_E120_F  | 0.0076 | 0.0092 | 0.0021 | 0.0097 | 0.0000 | 0.2672 |
| 0.0019 | 0.0000 | ITGA2_P26_R   | 0.0037 | 0.0005 | 0.0000 | 0.0025 | 0.0000 | 0.0000 |
| 0.5856 | 0.0025 | ITGB4_E144_F  | 0.0054 | 0.0108 | 0.0230 | 0.0073 | 0.0000 | 0.1293 |
| 0.0000 | 0.0015 | ITGB4_P517_F  | 0.2244 | 0.0000 | 0.0803 | 0.0000 | 0.0000 | 0.0000 |
| 0.0000 | 0.0000 | ITPR3_E86_R   | 0.0000 | 0.0000 | 0.0000 | 0.0000 | 0.0000 | 0.0000 |
| 0.0000 | 0.0000 | ITPR3_P1112_F | 0.0000 | 0.0000 | 0.0000 | 0.0000 | 0.0017 | 0.0000 |
| 0.0054 | 0.0000 | JAG2_E54_F    | 0.0073 | 0.0098 | 0.0000 | 0.0000 | 0.0000 | 0.0064 |
| 0.0115 | 0.0049 | JAG2_P264_F   | 0.0148 | 0.0145 | 0.0058 | 0.2143 | 0.1445 | 0.0171 |
| 0.0838 | 0.0115 | JAK2_P772_R   | 0.0089 | 0.0134 | 0.0992 | 0.0127 | 0.1009 | 0.0133 |
| 0.0081 | 0.0000 | JAK3_E64_F    | 0.0065 | 0.0102 | 0.0086 | 0.0058 | 0.0035 | 0.0043 |
| 0.3342 | 0.0088 | JAK3_P156_R   | 0.0125 | 0.0187 | 0.0371 | 0.0066 | 0.0043 | 0.0121 |
| 0.1210 | 0.0915 | JUNB_P1149_R  | 0.0558 | 0.0631 | 0.0507 | 0.0693 | 0.5627 | 0.1111 |
| 0.0104 | 0.0038 | KCNK4_E3_F    | 0.0025 | 0.3625 | 0.1630 | 0.9915 | 0.0000 | 0.2340 |
| 0.0133 | 0.0364 | KDR_E79_F     | 0.0152 | 0.0123 | 0.0017 | 0.0188 | 0.0178 | 0.0137 |
| 0.0015 | 0.0026 | KDR_P445_R    | 0.0046 | 0.0095 | 0.0040 | 0.0052 | 0.0000 | 0.0063 |

|        |        |                 |        |        |        |        |        |        |
|--------|--------|-----------------|--------|--------|--------|--------|--------|--------|
| 0.0093 | 0.0000 | KIAA1804_P689_R | 0.0102 | 0.0183 | 0.0023 | 0.0036 | 0.1450 | 0.0103 |
| 0.0038 | 0.1229 | KIT_P367_R      | 0.0055 | 0.0118 | 0.0004 | 0.1185 | 0.0000 | 0.0077 |
| 0.0082 | 0.0030 | KIT_P405_F      | 0.1099 | 0.0084 | 0.0848 | 0.0050 | 0.0023 | 0.1809 |
| 0.0066 | 0.0031 | KLF5_E190_R     | 0.0041 | 0.0064 | 0.1517 | 0.0132 | 0.0000 | 0.2512 |
| 0.0000 | 0.0000 | KLK11_P103_R    | 0.9771 | 0.8242 | 0.9684 | 0.9891 | 0.0018 | 0.8466 |
| 0.9646 | 0.0000 | KLK11_P1290_F   | 0.8523 | 0.8761 | 0.9756 | 0.9891 | 0.0000 | 0.9775 |
| 0.2349 | 0.6555 | KRAS_E82_F      | 0.8492 | 0.7450 | 0.6173 | 0.0278 | 0.0137 | 0.4987 |
| 0.0762 | 0.4897 | KRAS_P651_F     | 0.0728 | 0.0659 | 0.0432 | 0.0610 | 0.4797 | 0.0757 |
| 0.8413 | 0.9917 | KRT13_P341_R    | 0.9778 | 0.9804 | 0.9789 | 0.0000 | 0.9919 | 0.9762 |
| 0.6905 | 0.1910 | KRT5_P308_F     | 0.9658 | 0.8469 | 0.9548 | 0.2245 | 0.3285 | 0.6424 |
| 0.0073 | 0.1784 | L1CAM_P148_R    | 0.0030 | 0.0067 | 0.0123 | 0.0000 | 0.0000 | 0.0023 |
| 0.6724 | 0.0053 | L1CAM_P19_F     | 0.6583 | 0.2325 | 0.5316 | 0.0000 | 0.0000 | 0.0070 |
| 0.0093 | 0.0131 | LAMC1_E466_R    | 0.1463 | 0.0037 | 0.0000 | 0.0025 | 0.0029 | 0.0041 |
| 0.0118 | 0.0244 | LIF_E208_F      | 0.0109 | 0.0164 | 0.0162 | 0.0258 | 0.3908 | 0.0155 |
| 0.0022 | 0.0000 | LIF_P383_R      | 0.0057 | 0.5621 | 0.3763 | 0.0946 | 0.3619 | 0.5034 |
| 0.0170 | 0.0000 | LIG4_P194_F     | 0.0093 | 0.0135 | 0.0013 | 0.1115 | 0.0000 | 0.0080 |
| 0.0031 | 0.0011 | LMO1_E265_R     | 0.0000 | 0.0038 | 0.0000 | 0.0034 | 0.0000 | 0.0000 |
| 0.0111 | 0.0032 | LMO1_P169_F     | 0.0054 | 0.0092 | 0.0000 | 0.0110 | 0.0000 | 0.0085 |
| 0.0120 | 0.0712 | LOX_P313_R      | 0.0122 | 0.0235 | 0.0516 | 0.0171 | 0.2486 | 0.0162 |
| 0.0030 | 0.0000 | LOX_P71_F       | 0.0022 | 0.0053 | 0.0000 | 0.0046 | 0.0016 | 0.0017 |
| 0.0208 | 0.4991 | LRP2_E20_F      | 0.2089 | 0.0411 | 0.0271 | 0.0212 | 0.8089 | 0.0332 |
| 0.0059 | 0.0034 | LRRC32_P865_R   | 0.0068 | 0.0101 | 0.0146 | 0.0022 | 0.0000 | 0.0065 |
| 0.0308 | 0.4914 | LTB4R_E64_R     | 0.0559 | 0.0471 | 0.0287 | 0.4480 | 0.0209 | 0.0375 |
| 0.0000 | 0.0000 | LYN_E353_F      | 0.0717 | 0.4238 | 0.0016 | 0.0000 | 0.0000 | 0.0000 |
| 0.0705 | 0.0548 | LYN_P241_F      | 0.0792 | 0.0338 | 0.0563 | 0.0350 | 0.0220 | 0.0394 |
| 0.0000 | 0.0000 | MAF_P826_R      | 0.0000 | 0.0000 | 0.0000 | 0.0000 | 0.0000 | 0.0000 |
| 0.0000 | 0.0000 | MAGEC3_P903_F   | 0.8931 | 0.9327 | 0.5343 | 0.0133 | 0.0000 | 0.4888 |
| 0.9451 | 0.0000 | MAGEL2_E166_R   | 0.1969 | 0.9600 | 0.9547 | 0.2589 | 0.1422 | 0.0000 |
| 0.4608 | 0.0029 | MALT1_P406_R    | 0.0000 | 0.0023 | 0.0760 | 0.0036 | 0.0000 | 0.0000 |
| 0.0000 | 0.0000 | MAP2K6_E297_F   | 0.0000 | 0.3535 | 0.0000 | 0.0011 | 0.0000 | 0.0000 |
| 0.0100 | 0.0098 | MAP2K6_P297_R   | 0.0491 | 0.0144 | 0.1544 | 0.0259 | 0.0104 | 0.1136 |
| 0.0234 | 0.0077 | MAP3K1_P7_F     | 0.0285 | 0.0353 | 0.0251 | 0.0132 | 0.0081 | 0.0431 |
| 0.0217 | 0.0066 | MAP3K9_E17_R    | 0.0366 | 0.1201 | 0.1234 | 0.1806 | 0.3818 | 0.0097 |



|        |        |                    |        |        |        |        |        |        |
|--------|--------|--------------------|--------|--------|--------|--------|--------|--------|
| 0.1087 | 0.0089 | MAPK12_E165_R      | 0.1343 | 0.0106 | 0.0000 | 0.0374 | 0.0000 | 0.0082 |
| 0.0000 | 0.0000 | MAPK12_P416_F      | 0.0000 | 0.0000 | 0.0000 | 0.0000 | 0.0029 | 0.0000 |
| 0.0057 | 0.0019 | MAPK14_P327_R      | 0.0078 | 0.2490 | 0.0000 | 0.9741 | 0.0000 | 0.0044 |
| 0.9783 | 0.0000 | MAPK4_E273_R       | 0.7900 | 0.9797 | 0.9034 | 0.0000 | 0.0000 | 0.7938 |
| 0.9731 | 0.6188 | MAPK9_P1175_F      | 0.8109 | 0.9762 | 0.9722 | 0.0000 | 0.9851 | 0.9192 |
| 0.9821 | 0.2532 | MAS1_P469_R        | 0.9790 | 0.9823 | 0.9784 | 0.9922 | 0.5757 | 0.9802 |
| 0.0059 | 0.0041 | MATK_P64_F         | 0.0073 | 0.0094 | 0.0024 | 0.0511 | 0.0840 | 0.0085 |
| 0.0000 | 0.0000 | MC2R_P1025_F       | 0.9401 | 0.9269 | 0.9333 | 0.0000 | 0.0008 | 0.0000 |
| 0.0133 | 0.0059 | MCAM_P169_R        | 0.0030 | 0.4371 | 0.0692 | 0.0000 | 0.0000 | 0.0082 |
| 0.0848 | 0.0402 | MCAM_P265_R        | 0.3184 | 0.0235 | 0.4392 | 0.0062 | 0.0061 | 0.5024 |
| 0.0000 | 0.0000 | MCC_P196_R         | 0.0000 | 0.0000 | 0.0000 | 0.0000 | 0.0000 | 0.0000 |
| 0.0087 | 0.0144 | MCM2_P241_R        | 0.0065 | 0.0093 | 0.0185 | 0.0087 | 0.1996 | 0.0077 |
| 0.0058 | 0.0765 | MDR1_seq_42_S300_R | 0.0036 | 0.0084 | 0.0000 | 0.0080 | 0.0704 | 0.0041 |
| 0.0100 | 0.0000 | MDS1_E45_F         | 0.0056 | 0.0142 | 0.0051 | 0.0234 | 0.0030 | 0.0171 |
| 0.0087 | 0.0043 | MECP2_E90_R        | 0.0788 | 0.0107 | 0.1204 | 0.0066 | 0.0046 | 0.0061 |
| 0.0001 | 0.0000 | MEG3_E91_F         | 0.3689 | 0.7260 | 0.0788 | 0.0005 | 0.0000 | 0.0000 |
| 0.0026 | 0.0000 | MEST_E150_F        | 0.0009 | 0.0008 | 0.0000 | 0.0000 | 0.0000 | 0.0000 |
| 0.0051 | 0.0000 | MEST_P4_F          | 0.0013 | 0.0063 | 0.0739 | 0.0024 | 0.0000 | 0.0021 |
| 0.0000 | 0.0005 | MEST_P62_R         | 0.0000 | 0.0027 | 0.0597 | 0.0001 | 0.0000 | 0.1202 |
| 0.0237 | 0.0086 | MET_E333_F         | 0.6221 | 0.8289 | 0.8306 | 0.5111 | 0.9907 | 0.8484 |
| 0.6168 | 0.0000 | MFAP4_P197_F       | 0.0042 | 0.0052 | 0.2124 | 0.0000 | 0.0818 | 0.3562 |
| 0.0000 | 0.0080 | MGMT_P272_R        | 0.0000 | 0.0042 | 0.0200 | 0.0000 | 0.0000 | 0.0016 |
| 0.0144 | 0.5040 | MGMT_P281_F        | 0.2841 | 0.2072 | 0.0464 | 0.0097 | 0.4282 | 0.5212 |
| 0.9696 | 0.9922 | MKRN3_P108_F       | 0.9790 | 0.9718 | 0.9698 | 0.0000 | 0.0000 | 0.9750 |
| 0.0253 | 0.0000 | MLF1_P97_F         | 0.2456 | 0.4475 | 0.1286 | 0.0071 | 0.0039 | 0.5152 |
| 0.0085 | 0.0037 | MLH1_P381_F        | 0.0060 | 0.0085 | 0.0013 | 0.0028 | 0.0042 | 0.0103 |
| 0.0017 | 0.0037 | MLH3_E72_F         | 0.0000 | 0.0038 | 0.0000 | 0.0000 | 0.0067 | 0.0048 |
| 0.3019 | 0.0017 | MLH3_P25_F         | 0.0156 | 0.0631 | 0.0514 | 0.0033 | 0.0000 | 0.1014 |
| 0.0000 | 0.0000 | MLLT3_E93_R        | 0.0000 | 0.0029 | 0.0000 | 0.0033 | 0.0000 | 0.0000 |
| 0.4403 | 0.1738 | MLLT4_P1400_F      | 0.0154 | 0.0418 | 0.0134 | 0.0145 | 0.0105 | 0.0188 |
| 0.0044 | 0.0020 | MLLT6_P957_F       | 0.0031 | 0.0031 | 0.0000 | 0.0000 | 0.0034 | 0.0022 |
| 0.0000 | 0.0000 | MME_E29_F          | 0.0008 | 0.5611 | 0.0000 | 0.0048 | 0.0000 | 0.0041 |
| 0.0000 | 0.0000 | MME_P388_F         | 0.0000 | 0.0000 | 0.0354 | 0.0000 | 0.0061 | 0.0000 |

|        |        |              |        |        |        |        |        |        |
|--------|--------|--------------|--------|--------|--------|--------|--------|--------|
| 0.7000 | 0.9911 | MMP19_E274_R | 0.9819 | 0.9824 | 0.9834 | 0.0000 | 0.0000 | 0.9804 |
| 0.0050 | 0.0000 | MMP2_E21_R   | 0.2699 | 0.0045 | 0.0591 | 0.0047 | 0.0027 | 0.0019 |
| 0.0064 | 0.0042 | MMP2_P197_F  | 0.0060 | 0.0093 | 0.0000 | 0.0063 | 0.0000 | 0.2468 |
| 0.0085 | 0.0249 | MMP2_P303_R  | 0.0090 | 0.0110 | 0.0032 | 0.0070 | 0.0019 | 0.0099 |
| 0.9818 | 0.8259 | MMP3_P16_R   | 0.8826 | 0.9659 | 0.9785 | 0.0000 | 0.9906 | 0.9808 |
| 0.7618 | 0.1181 | MMP7_P613_F  | 0.7476 | 0.6949 | 0.8300 | 0.3319 | 0.9930 | 0.9106 |
| 0.0102 | 0.0507 | MMP9_P189_F  | 0.0137 | 0.0163 | 0.2693 | 0.0581 | 0.0053 | 0.6789 |
| 0.0173 | 0.0051 | MMP9_P237_R  | 0.0111 | 0.0116 | 0.0058 | 0.0093 | 0.0582 | 0.0169 |
| 0.0076 | 0.0051 | MOS_E60_R    | 0.2862 | 0.0081 | 0.0000 | 0.0050 | 0.0206 | 0.0082 |
| 0.0043 | 0.0046 | MPO_P883_R   | 0.1772 | 0.0041 | 0.1433 | 0.0127 | 0.0034 | 0.0047 |
| 0.9806 | 0.9899 | MSH3_E3_F    | 0.9323 | 0.9812 | 0.9424 | 0.9847 | 0.0000 | 0.9878 |
| 0.4870 | 0.4789 | MSH3_P13_R   | 0.7186 | 0.7285 | 0.4898 | 0.0098 | 0.3794 | 0.7004 |
| 0.0000 | 0.0000 | MST1R_P392_F | 0.0000 | 0.0000 | 0.0000 | 0.0000 | 0.0000 | 0.0000 |
| 0.5263 | 0.0089 | MT1A_E13_R   | 0.0109 | 0.0112 | 0.1562 | 0.0844 | 0.1466 | 0.0631 |
| 0.0981 | 0.0002 | MT1A_P49_R   | 0.0000 | 0.0000 | 0.0105 | 0.0000 | 0.0000 | 0.0000 |
| 0.0154 | 0.0078 | MTA1_P478_F  | 0.0319 | 0.3303 | 0.1079 | 0.0098 | 0.6374 | 0.2932 |
| 0.8995 | 0.0000 | MUC1_E18_R   | 0.8339 | 0.0000 | 0.8933 | 0.0000 | 0.0000 | 0.0000 |
| 0.0102 | 0.0000 | MUC1_P191_F  | 0.0047 | 0.2642 | 0.0000 | 0.0059 | 0.0000 | 0.0053 |
| 0.0026 | 0.0000 | MXI1_P75_R   | 0.0048 | 0.0065 | 0.0000 | 0.0057 | 0.6039 | 0.0054 |
| 0.4052 | 0.0071 | MYBL2_P211_F | 0.0078 | 0.0140 | 0.0000 | 0.0000 | 0.0000 | 0.2650 |
| 0.0000 | 0.0000 | MYCL1_P502_R | 0.0040 | 0.0019 | 0.0000 | 0.0000 | 0.0031 | 0.3021 |
| 0.0212 | 0.0118 | MYCN_E77_R   | 0.0127 | 0.0248 | 0.0694 | 0.0068 | 0.0012 | 0.0140 |
| 0.0058 | 0.0046 | MYCN_P464_R  | 0.0024 | 0.0092 | 0.0000 | 0.0044 | 0.0000 | 0.0035 |
| 0.4833 | 0.0098 | MYH11_P22_F  | 0.0024 | 0.0080 | 0.0000 | 0.0024 | 0.0000 | 0.0049 |
| 0.0000 | 0.0000 | MYH11_P236_R | 0.0000 | 0.0000 | 0.0000 | 0.0000 | 0.0000 | 0.0000 |
| 0.2044 | 0.3731 | MYLK_P469_R  | 0.0077 | 0.0120 | 0.1295 | 0.0149 | 0.3936 | 0.0116 |
| 0.0031 | 0.0063 | MYOD1_E156_F | 0.0030 | 0.0049 | 0.0303 | 0.1186 | 0.0000 | 0.0020 |
| 0.0000 | 0.0000 | MYOD1_P50_F  | 0.6050 | 0.0000 | 0.0713 | 0.0000 | 0.0000 | 0.0000 |
| 0.9620 | 0.9948 | NBL1_E205_R  | 0.9796 | 0.0310 | 0.9753 | 0.0752 | 0.9940 | 0.9788 |
| 0.8651 | 0.0000 | NBL1_P24_F   | 0.7201 | 0.9803 | 0.9606 | 0.0000 | 0.0000 | 0.9743 |
| 0.0055 | 0.0029 | NCL_P840_R   | 0.0081 | 0.0150 | 0.0073 | 0.0000 | 0.0010 | 0.0148 |
| 0.0000 | 0.8800 | NDN_P1110_F  | 0.9721 | 0.9750 | 0.9742 | 0.9888 | 0.0000 | 0.9712 |
| 0.5416 | 0.9931 | NEFL_E23_R   | 0.4420 | 0.6749 | 0.2338 | 0.8563 | 0.8841 | 0.9697 |

|        |        |                |        |        |        |        |        |        |
|--------|--------|----------------|--------|--------|--------|--------|--------|--------|
| 0.0000 | 0.0000 | NEFL_P209_R    | 0.0000 | 0.0000 | 0.0000 | 0.0000 | 0.0000 | 0.0000 |
| 0.0000 | 0.0009 | NEO1_P1067_F   | 0.0000 | 0.0000 | 0.0000 | 0.0000 | 0.0000 | 0.0000 |
| 0.0000 | 0.0000 | NES_P239_R     | 0.0000 | 0.0044 | 0.1977 | 0.0086 | 0.0032 | 0.0000 |
| 0.0000 | 0.0055 | NEU1_P745_F    | 0.0025 | 0.0061 | 0.0000 | 0.0093 | 0.0000 | 0.0032 |
| 0.0000 | 0.0058 | NFKB1_P336_R   | 0.0000 | 0.1194 | 0.0000 | 0.0173 | 0.0000 | 0.4579 |
| 0.0227 | 0.1638 | NFKB2_P709_R   | 0.0231 | 0.0291 | 0.0216 | 0.3018 | 0.0057 | 0.0302 |
| 0.0000 | 0.0000 | NGFB_E353_F    | 0.6967 | 0.4198 | 0.0633 | 0.0000 | 0.4153 | 0.0004 |
| 0.1387 | 0.0371 | NGFB_P13_F     | 0.1266 | 0.1795 | 0.1708 | 0.1720 | 0.3173 | 0.0634 |
| 0.8791 | 0.0035 | NGFR_E328_F    | 0.0037 | 0.0051 | 0.0936 | 0.0055 | 0.0000 | 0.0023 |
| 0.7311 | 0.3387 | NGFR_P355_F    | 0.3422 | 0.0577 | 0.0435 | 0.0489 | 0.0525 | 0.6715 |
| 0.0099 | 0.0000 | NKX3-1_P146_F  | 0.0077 | 0.0098 | 0.0331 | 0.0061 | 0.0055 | 0.0112 |
| 0.9871 | 0.0000 | NKX3-1_P871_R  | 0.9814 | 0.9802 | 0.9802 | 0.0000 | 0.0000 | 0.9822 |
| 0.0000 | 0.0000 | NOTCH1_E452_R  | 0.0000 | 0.0000 | 0.0000 | 0.0000 | 0.0000 | 0.0000 |
| 0.0000 | 0.0005 | NOTCH1_P1198_F | 0.0000 | 0.0000 | 0.0099 | 0.0000 | 0.0002 | 0.0000 |
| 0.0031 | 0.0041 | NOTCH2_P312_R  | 0.0297 | 0.0051 | 0.0000 | 0.0075 | 0.0037 | 0.0029 |
| 0.0000 | 0.0000 | NOTCH3_E403_F  | 0.0000 | 0.0013 | 0.0317 | 0.0000 | 0.0015 | 0.0000 |
| 0.9570 | 0.2878 | NPR2_P618_F    | 0.8144 | 0.0989 | 0.2129 | 0.0050 | 0.5803 | 0.0027 |
| 0.0304 | 0.4597 | NPY_P295_F     | 0.0189 | 0.0327 | 0.0407 | 0.0262 | 0.8174 | 0.0291 |
| 0.0176 | 0.1125 | NPY_P91_F      | 0.0148 | 0.0191 | 0.0134 | 0.0145 | 0.1746 | 0.0158 |
| 0.0059 | 0.0000 | NQO1_E74_R     | 0.0049 | 0.0067 | 0.0000 | 0.0000 | 0.0000 | 0.0079 |
| 0.0009 | 0.0000 | NQO1_P345_R    | 0.0006 | 0.0991 | 0.0000 | 0.0021 | 0.0000 | 0.0000 |
| 0.0096 | 0.0070 | NR2F6_E375_R   | 0.0101 | 0.0133 | 0.0605 | 0.0110 | 0.2116 | 0.0284 |
| 0.0000 | 0.0067 | NRAS_P103_R    | 0.0000 | 0.0018 | 0.0000 | 0.0035 | 0.0036 | 0.0000 |
| 0.0000 | 0.0000 | NRAS_P12_R     | 0.0000 | 0.0000 | 0.0000 | 0.0000 | 0.0000 | 0.0000 |
| 0.0004 | 0.0000 | NRG1_E74_F     | 0.0019 | 0.0033 | 0.0000 | 0.0003 | 0.0022 | 0.0006 |
| 0.0071 | 0.0117 | NRG1_P558_R    | 0.0024 | 0.0064 | 0.0089 | 0.0054 | 0.1009 | 0.1279 |
| 0.0045 | 0.0026 | NTRK2_P10_F    | 0.0086 | 0.0086 | 0.0404 | 0.1859 | 0.0000 | 0.0055 |
| 0.0000 | 0.0080 | NTRK2_P395_R   | 0.0134 | 0.0030 | 0.0000 | 0.0000 | 0.0000 | 0.4802 |
| 0.0000 | 0.0038 | NTRK3_E131_F   | 0.0000 | 0.0045 | 0.0338 | 0.0001 | 0.0000 | 0.0000 |
| 0.0000 | 0.0000 | NTRK3_P636_R   | 0.0000 | 0.0000 | 0.0000 | 0.0000 | 0.0000 | 0.0000 |
| 0.0000 | 0.0000 | NTRK3_P752_F   | 0.0000 | 0.0005 | 0.0000 | 0.0000 | 0.0043 | 0.0000 |
| 0.0077 | 0.0082 | NTSR1_E109_F   | 0.0056 | 0.0102 | 0.0000 | 0.0043 | 0.0029 | 0.0096 |
| 0.0215 | 0.0000 | NTSR1_P318_F   | 0.0094 | 0.0183 | 0.0050 | 0.0150 | 0.0000 | 0.0157 |

|        |        |                    |        |        |        |        |        |        |
|--------|--------|--------------------|--------|--------|--------|--------|--------|--------|
| 0.0108 | 0.3068 | OAT_P465_F         | 0.2042 | 0.1874 | 0.2046 | 0.0082 | 0.4080 | 0.0591 |
| 0.0019 | 0.0007 | ODC1_P424_F        | 0.0000 | 0.0034 | 0.0000 | 0.0000 | 0.0000 | 0.0000 |
| 0.0577 | 0.7107 | ONECUT2_E96_F      | 0.4811 | 0.0343 | 0.0146 | 0.0121 | 0.0000 | 0.0284 |
| 0.0000 | 0.0000 | ONECUT2_P315_R     | 0.0000 | 0.0000 | 0.0000 | 0.0000 | 0.0026 | 0.0000 |
| 0.0043 | 0.0026 | OPCML_E219_R       | 0.0043 | 0.0059 | 0.0000 | 0.0494 | 0.0024 | 0.0039 |
| 0.0078 | 0.0021 | OPCML_P71_F        | 0.4408 | 0.0837 | 0.2167 | 0.0000 | 0.0000 | 0.0057 |
| 0.0147 | 0.0052 | OSM_P188_F         | 0.0126 | 0.0811 | 0.0053 | 0.0069 | 0.0051 | 0.0135 |
| 0.0127 | 0.0487 | p16_seq_47_S188_R  | 0.0049 | 0.0068 | 0.0000 | 0.0043 | 0.0149 | 0.0036 |
| 0.1830 | 0.0032 | P2RX7_E323_R       | 0.1300 | 0.4748 | 0.0248 | 0.0044 | 0.0040 | 0.0057 |
| 0.0292 | 0.1831 | P2RX7_P119_R       | 0.0220 | 0.0373 | 0.0829 | 0.0123 | 0.1495 | 0.0342 |
| 0.8270 | 0.1908 | P2RX7_P597_F       | 0.9493 | 0.9842 | 0.9861 | 0.9903 | 0.5246 | 0.9884 |
| 0.0254 | 0.4441 | PALM2-AKAP2_P183_R | 0.0248 | 0.1177 | 0.0559 | 0.0266 | 0.0197 | 0.0250 |
| 0.0026 | 0.0067 | PALM2-AKAP2_P420_R | 0.0047 | 0.0061 | 0.0575 | 0.0063 | 0.0000 | 0.0030 |
| 0.8666 | 0.2583 | PARP1_P610_R       | 0.9765 | 0.6450 | 0.6799 | 0.0045 | 0.0060 | 0.9383 |
| 0.0116 | 0.0000 | PAX6_P1121_F       | 0.0083 | 0.0152 | 0.0009 | 0.0125 | 0.0156 | 0.0115 |
| 0.0000 | 0.0038 | PAX6_P50_R         | 0.0000 | 0.0000 | 0.0000 | 0.0000 | 0.0000 | 0.0000 |
| 0.0114 | 0.0055 | PCDH1_E22_F        | 0.0137 | 0.0161 | 0.0039 | 0.0032 | 0.0000 | 0.0144 |
| 0.0113 | 0.1054 | PCGF4_P760_R       | 0.2012 | 0.2129 | 0.0636 | 0.0073 | 0.0049 | 0.0123 |
| 0.0027 | 0.0041 | PCGF4_P92_R        | 0.0112 | 0.0179 | 0.0000 | 0.0106 | 0.0213 | 0.0156 |
| 0.7370 | 0.8799 | PCTK1_E77_R        | 0.7566 | 0.8929 | 0.6113 | 0.9789 | 0.8609 | 0.9030 |
| 0.0220 | 0.0117 | PDE1B_E141_F       | 0.0148 | 0.2550 | 0.0071 | 0.3157 | 0.0077 | 0.0151 |
| 0.0101 | 0.0046 | PDE1B_P263_R       | 0.1956 | 0.0120 | 0.0258 | 0.0065 | 0.0117 | 0.2072 |
| 0.0006 | 0.0000 | PDGFA_P841_R       | 0.1651 | 0.0011 | 0.0000 | 0.0000 | 0.0000 | 0.0021 |
| 0.0088 | 0.0035 | PDGFRB_E195_R      | 0.0070 | 0.0073 | 0.0813 | 0.0060 | 0.0000 | 0.0061 |
| 0.0017 | 0.0026 | PDGFRB_P343_F      | 0.0007 | 0.0015 | 0.0000 | 0.0052 | 0.0015 | 0.0003 |
| 0.0026 | 0.0000 | PEG10_P978_R       | 0.5129 | 0.1284 | 0.1807 | 0.0000 | 0.0029 | 0.0640 |
| 0.1611 | 0.0267 | PENK_E26_F         | 0.0736 | 0.1726 | 0.1291 | 0.0464 | 0.0176 | 0.1889 |
| 0.0051 | 0.0000 | PENK_P447_R        | 0.8922 | 0.0064 | 0.1102 | 0.0240 | 0.0910 | 0.0016 |
| 0.0212 | 0.0092 | PGF_E33_F          | 0.0143 | 0.0135 | 0.0055 | 0.0110 | 0.2949 | 0.0161 |
| 0.0108 | 0.0040 | PHLDA2_P622_F      | 0.0045 | 0.1582 | 0.1698 | 0.0045 | 0.0012 | 0.2695 |
| 0.2847 | 0.4845 | PI3_P1394_R        | 0.0463 | 0.4628 | 0.8803 | 0.4780 | 0.3908 | 0.8435 |
| 0.0182 | 0.1226 | PITX2_E24_R        | 0.0124 | 0.0199 | 0.1903 | 0.0126 | 0.3474 | 0.0128 |
| 0.0000 | 0.0016 | PITX2_P183_R       | 0.3832 | 0.0000 | 0.0578 | 0.0029 | 0.0000 | 0.5006 |

|        |        |                |        |        |        |        |        |        |
|--------|--------|----------------|--------|--------|--------|--------|--------|--------|
| 0.0130 | 0.1550 | PKD2_P287_R    | 0.0078 | 0.0095 | 0.0000 | 0.0039 | 0.0000 | 0.0107 |
| 0.0112 | 0.0081 | PKD2_P336_R    | 0.0089 | 0.1056 | 0.0472 | 0.8382 | 0.0025 | 0.0287 |
| 0.0187 | 0.4108 | PLAU_P11_F     | 0.3618 | 0.0264 | 0.0397 | 0.0115 | 0.6570 | 0.0442 |
| 0.0064 | 0.0003 | PLAU_P176_R    | 0.0018 | 0.0100 | 0.2305 | 0.0000 | 0.9914 | 0.9315 |
| 0.0025 | 0.0019 | PLAUR_E123_F   | 0.0041 | 0.0068 | 0.0160 | 0.0028 | 0.0016 | 0.0032 |
| 0.0009 | 0.0000 | PLAUR_P82_F    | 0.0000 | 0.0016 | 0.0000 | 0.0025 | 0.0000 | 0.0000 |
| 0.9235 | 0.9919 | PLG_E406_F     | 0.9894 | 0.9702 | 0.9878 | 0.9926 | 0.9935 | 0.9911 |
| 0.1276 | 0.0672 | PLSCR3_P751_R  | 0.1544 | 0.1776 | 0.1941 | 0.0402 | 0.0059 | 0.1003 |
| 0.0109 | 0.0032 | PLXDC1_P236_F  | 0.0121 | 0.0152 | 0.0038 | 0.1347 | 0.1758 | 0.0130 |
| 0.0144 | 0.0009 | PLXDC2_E337_F  | 0.0034 | 0.0074 | 0.0000 | 0.0070 | 0.0055 | 0.0033 |
| 0.0381 | 0.3756 | PLXDC2_P914_R  | 0.0271 | 0.0386 | 0.0247 | 0.0447 | 0.0145 | 0.5267 |
| 0.9821 | 0.0000 | PMP22_P975_F   | 0.9810 | 0.9742 | 0.9736 | 0.9125 | 0.9915 | 0.9849 |
| 0.1089 | 0.1256 | PODXL_P1341_R  | 0.0040 | 0.0096 | 0.0196 | 0.0071 | 0.0033 | 0.0067 |
| 0.0148 | 0.5153 | POMC_E254_F    | 0.0107 | 0.0778 | 0.0066 | 0.0130 | 0.0000 | 0.0134 |
| 0.0033 | 0.0025 | POMC_P400_R    | 0.0085 | 0.0072 | 0.0037 | 0.0000 | 0.0058 | 0.0041 |
| 0.0089 | 0.1817 | POMC_P53_F     | 0.0084 | 0.0107 | 0.0033 | 0.0060 | 0.0077 | 0.0114 |
| 0.0130 | 0.0000 | PPARD_P846_F   | 0.0025 | 0.0063 | 0.3255 | 0.0000 | 0.0000 | 0.7231 |
| 0.0000 | 0.0000 | PPARG_E178_R   | 0.0033 | 0.0063 | 0.0000 | 0.0174 | 0.0000 | 0.0005 |
| 0.0068 | 0.0000 | PPP2R1B_P268_R | 0.0020 | 0.0062 | 0.0000 | 0.0040 | 0.0000 | 0.0028 |
| 0.9773 | 0.9915 | PRDM2_P1340_R  | 0.9682 | 0.9510 | 0.9662 | 0.0000 | 0.5776 | 0.9586 |
| 0.0010 | 0.0000 | PRKCDBP_E206_F | 0.0005 | 0.0010 | 0.0000 | 0.0000 | 0.0000 | 0.2892 |
| 0.0039 | 0.0000 | PROK2_E0_F     | 0.0034 | 0.0072 | 0.0000 | 0.0000 | 0.0000 | 0.0061 |
| 0.0000 | 0.0000 | PROK2_P390_F   | 0.0000 | 0.0015 | 0.0000 | 0.0000 | 0.0000 | 0.0000 |
| 0.9861 | 0.9923 | PRSS8_E134_R   | 0.9859 | 0.9850 | 0.9818 | 0.0095 | 0.9927 | 0.9850 |
| 0.0000 | 0.0000 | PSCA_E359_F    | 0.6443 | 0.0022 | 0.1191 | 0.0000 | 0.0000 | 0.0002 |
| 0.0023 | 0.0060 | PSIP1_P163_R   | 0.0028 | 0.0270 | 0.0000 | 0.0000 | 0.0034 | 0.0030 |
| 0.0142 | 0.0000 | PTCH_E42_F     | 0.0168 | 0.0131 | 0.0049 | 0.2019 | 0.0000 | 0.0164 |
| 0.3562 | 0.6050 | PTCH2_P568_R   | 0.1651 | 0.6725 | 0.4021 | 0.0077 | 0.0291 | 0.4873 |
| 0.0084 | 0.0054 | PTEN_P438_F    | 0.0059 | 0.0062 | 0.0000 | 0.0000 | 0.0046 | 0.0039 |
| 0.0068 | 0.0081 | PTGS1_P2_F     | 0.0081 | 0.0097 | 0.0492 | 0.0000 | 0.0000 | 0.0080 |
| 0.0042 | 0.4318 | PTGS2_P308_F   | 0.0022 | 0.0060 | 0.0000 | 0.0063 | 0.0099 | 0.0025 |
| 0.0074 | 0.0000 | PTGS2_P524_R   | 0.0052 | 0.0116 | 0.0000 | 0.0000 | 0.0000 | 0.0081 |
| 0.0000 | 0.0000 | PTHLH_P15_R    | 0.0000 | 0.2240 | 0.3811 | 0.0000 | 0.0000 | 0.6465 |

|        |        |                   |        |        |        |        |        |        |
|--------|--------|-------------------|--------|--------|--------|--------|--------|--------|
| 0.0509 | 0.0759 | PTHR1_P170_R      | 0.9739 | 0.9709 | 0.9745 | 0.9903 | 0.9927 | 0.9782 |
| 0.0186 | 0.0108 | PTK2_P735_R       | 0.0082 | 0.0090 | 0.0007 | 0.1391 | 0.2824 | 0.0098 |
| 0.0086 | 0.0005 | PTK2B_P673_R      | 0.0049 | 0.0078 | 0.0287 | 0.0000 | 0.0027 | 0.0024 |
| 0.0000 | 0.0000 | PTPN6_E171_R      | 0.0000 | 0.0000 | 0.0000 | 0.0030 | 0.0000 | 0.0000 |
| 0.0000 | 0.0000 | PTPN6_P282_R      | 0.0000 | 0.0000 | 0.0851 | 0.0000 | 0.0000 | 0.4359 |
| 0.0000 | 0.0000 | PTPNS1_E433_R     | 0.0000 | 0.0000 | 0.0000 | 0.0000 | 0.0016 | 0.0000 |
| 0.0110 | 0.0029 | PTPNS1_P301_R     | 0.0110 | 0.0144 | 0.0027 | 0.0045 | 0.0000 | 0.0103 |
| 0.2648 | 0.0000 | PTPRF_E178_R      | 0.0025 | 0.1533 | 0.1879 | 0.0000 | 0.0009 | 0.2521 |
| 0.0085 | 0.3025 | PTPRG_E40_R       | 0.0242 | 0.0256 | 0.0639 | 0.0064 | 0.4719 | 0.0060 |
| 0.0073 | 0.0000 | PTPRG_P476_F      | 0.0053 | 0.0074 | 0.0000 | 0.0046 | 0.0064 | 0.0083 |
| 0.0000 | 0.0031 | PTPRO_E56_F       | 0.0000 | 0.0021 | 0.0000 | 0.0000 | 0.0000 | 0.0000 |
| 0.0000 | 0.0000 | PURA_P928_R       | 0.0000 | 0.0000 | 0.0000 | 0.0000 | 0.0000 | 0.0000 |
| 0.9772 | 0.0000 | PWCR1_P811_F      | 0.9722 | 0.9586 | 0.9826 | 0.0000 | 0.0000 | 0.9738 |
| 0.0205 | 0.0077 | PYCARD_E87_F      | 0.0150 | 0.0195 | 0.0069 | 0.0118 | 0.3034 | 0.0152 |
| 0.3209 | 0.0355 | PYCARD_P150_F     | 0.0055 | 0.6695 | 0.6008 | 0.0065 | 0.0067 | 0.5553 |
| 0.0014 | 0.0000 | RAB32_E314_R      | 0.0000 | 0.0064 | 0.0000 | 0.0000 | 0.0000 | 0.3968 |
| 0.0000 | 0.0000 | RAB32_P493_R      | 0.0000 | 0.0000 | 0.0000 | 0.0000 | 0.0000 | 0.0000 |
| 0.0047 | 0.0000 | RAF1_P330_F       | 0.2327 | 0.2062 | 0.0119 | 0.0000 | 0.0000 | 0.0000 |
| 0.6286 | 0.9921 | RAN_P581_R        | 0.9742 | 0.8145 | 0.8943 | 0.0000 | 0.0000 | 0.0949 |
| 0.0094 | 0.0026 | RARA_E128_R       | 0.2189 | 0.3360 | 0.2147 | 0.0038 | 0.0030 | 0.2964 |
| 0.4792 | 0.0000 | RARA_P176_R       | 0.0034 | 0.0026 | 0.1601 | 0.0000 | 0.0011 | 0.0000 |
| 0.0019 | 0.0000 | RARB_E114_F       | 0.0013 | 0.0060 | 0.0067 | 0.0032 | 0.0000 | 0.0047 |
| 0.0000 | 0.0000 | RARB_P60_F        | 0.0000 | 0.0016 | 0.2649 | 0.0000 | 0.0000 | 0.0000 |
| 0.0109 | 0.0135 | RARRES1_E235_F    | 0.0056 | 0.0205 | 0.0293 | 0.0074 | 0.0157 | 0.0614 |
| 0.0128 | 0.0919 | RASGRF1_E16_F     | 0.0049 | 0.0089 | 0.0000 | 0.0000 | 0.1459 | 0.0061 |
| 0.0065 | 0.0073 | RASGRF1_P768_F    | 0.0023 | 0.0057 | 0.0278 | 0.0032 | 0.0493 | 0.0058 |
| 0.0034 | 0.0000 | RASSF1_E116_F     | 0.3208 | 0.0066 | 0.0334 | 0.0000 | 0.0000 | 0.0000 |
| 0.0046 | 0.3110 | RASSF1_P244_F     | 0.0051 | 0.0102 | 0.0000 | 0.0000 | 0.1667 | 0.0094 |
| 0.0161 | 0.1674 | RBL2_P250_R       | 0.6326 | 0.0101 | 0.0542 | 0.0030 | 0.2152 | 0.0075 |
| 0.0020 | 0.0018 | RBP1_E158_F       | 0.0016 | 0.0029 | 0.0000 | 0.0002 | 0.0000 | 0.0000 |
| 0.0000 | 0.0000 | RBP1_P150_F       | 0.0000 | 0.0000 | 0.0000 | 0.0000 | 0.0000 | 0.0000 |
| 0.0051 | 0.4852 | RET_P717_F        | 0.0084 | 0.0094 | 0.0004 | 0.0120 | 0.0000 | 0.0614 |
| 0.0056 | 0.0000 | RET_seq_53_S374_F | 0.0088 | 0.0068 | 0.0000 | 0.2643 | 0.1780 | 0.0070 |

|        |        |                 |        |        |        |        |        |        |
|--------|--------|-----------------|--------|--------|--------|--------|--------|--------|
| 0.0000 | 0.8706 | RHOC_P536_F     | 0.0000 | 0.0018 | 0.0000 | 0.0000 | 0.0000 | 0.0000 |
| 0.0000 | 0.0000 | RHOH_P121_F     | 0.0000 | 0.0000 | 0.0000 | 0.0000 | 0.0000 | 0.0000 |
| 0.9766 | 0.0430 | RHOH_P953_R     | 0.9482 | 0.8948 | 0.9693 | 0.0000 | 0.9917 | 0.9810 |
| 0.0470 | 0.4046 | RIPK1_P868_F    | 0.9725 | 0.9734 | 0.9749 | 0.6051 | 0.5608 | 0.9778 |
| 0.0071 | 0.0857 | RIPK2_E123_F    | 0.0007 | 0.3399 | 0.0000 | 0.0266 | 0.0488 | 0.1359 |
| 0.0061 | 0.1774 | RIPK3_P124_F    | 0.0076 | 0.0590 | 0.0012 | 0.0095 | 0.0042 | 0.0106 |
| 0.0000 | 0.0000 | RIPK3_P24_F     | 0.0000 | 0.0000 | 0.0000 | 0.0000 | 0.0044 | 0.0000 |
| 0.0018 | 0.0000 | RIPK4_E166_F    | 0.3537 | 0.0044 | 0.0896 | 0.0000 | 0.0000 | 0.0006 |
| 0.3543 | 0.0058 | RIPK4_P172_F    | 0.0076 | 0.1940 | 0.0836 | 0.0095 | 0.0076 | 0.1845 |
| 0.0059 | 0.0077 | ROR1_P6_F       | 0.0000 | 0.0000 | 0.0000 | 0.0000 | 0.0000 | 0.0027 |
| 0.0000 | 0.0046 | ROR2_P317_R     | 0.0008 | 0.0053 | 0.0255 | 0.0007 | 0.0000 | 0.0000 |
| 0.0000 | 0.0000 | RRAS_P100_R     | 0.0000 | 0.0000 | 0.0000 | 0.0019 | 0.0011 | 0.0000 |
| 0.9175 | 0.0000 | RUNX3_P247_F    | 0.7309 | 0.9647 | 0.9320 | 0.0047 | 0.0000 | 0.9010 |
| 0.8062 | 0.0000 | RYK_P493_F      | 0.0000 | 0.0000 | 0.0000 | 0.0000 | 0.0000 | 0.0000 |
| 0.2481 | 0.0000 | S100A2_E36_R    | 0.4363 | 0.0103 | 0.2732 | 0.0000 | 0.0000 | 0.3804 |
| 0.0093 | 0.0057 | S100A4_E315_F   | 0.0083 | 0.1592 | 0.0734 | 0.0102 | 0.1098 | 0.0095 |
| 0.0000 | 0.0000 | SCGB3A1_E55_R   | 0.1813 | 0.0016 | 0.0000 | 0.0000 | 0.0000 | 0.0000 |
| 0.0017 | 0.0000 | SCGB3A1_P103_R  | 0.0108 | 0.0000 | 0.0000 | 0.0000 | 0.0000 | 0.0000 |
| 0.0024 | 0.0000 | SEMA3A_P343_F   | 0.0011 | 0.0036 | 0.0000 | 0.0000 | 0.0000 | 0.0014 |
| 0.8322 | 0.0787 | SEMA3A_P658_R   | 0.7753 | 0.0411 | 0.2263 | 0.0812 | 0.0616 | 0.3927 |
| 0.2381 | 0.0141 | SEMA3C_E49_R    | 0.0163 | 0.0134 | 0.0276 | 0.1597 | 0.3523 | 0.0155 |
| 0.0287 | 0.0533 | SEMA3C_P642_F   | 0.0075 | 0.0260 | 0.1006 | 0.0171 | 0.0036 | 0.0106 |
| 0.0040 | 0.0061 | SEMA3F_E333_R   | 0.0052 | 0.2594 | 0.0000 | 0.0037 | 0.0000 | 0.2795 |
| 0.4528 | 0.0000 | SEMA3F_P692_R   | 0.6032 | 0.4335 | 0.1798 | 0.0228 | 0.0000 | 0.0044 |
| 0.3242 | 0.0090 | SEPT5_P441_F    | 0.0079 | 0.0100 | 0.5195 | 0.0727 | 0.0064 | 0.1799 |
| 0.8404 | 0.0111 | SEPT9_P58_R     | 0.1228 | 0.6269 | 0.8117 | 0.9898 | 0.4664 | 0.8510 |
| 0.8963 | 0.1962 | SERPINA5_E69_F  | 0.8350 | 0.9395 | 0.7597 | 0.4202 | 0.3375 | 0.9627 |
| 0.9875 | 0.0028 | SERPINB2_P939_F | 0.9864 | 0.9819 | 0.9784 | 0.9844 | 0.9930 | 0.9840 |
| 0.1261 | 0.0078 | SERPINE1_E189_R | 0.0125 | 0.1451 | 0.1182 | 0.0120 | 0.5427 | 0.2783 |
| 0.0043 | 0.0000 | SEZ6L_P249_F    | 0.0038 | 0.0056 | 0.0404 | 0.0058 | 0.0025 | 0.0040 |
| 0.0054 | 0.0000 | SEZ6L_P299_F    | 0.2988 | 0.0047 | 0.0000 | 0.0035 | 0.0000 | 0.0002 |
| 0.5958 | 0.0215 | SFN_E118_F      | 0.9840 | 0.9462 | 0.9817 | 0.9930 | 0.7161 | 0.9824 |
| 0.0024 | 0.0000 | SFRP1_E398_R    | 0.0000 | 0.0035 | 0.0000 | 0.0000 | 0.0017 | 0.0024 |

|        |        |                      |        |        |        |        |        |        |
|--------|--------|----------------------|--------|--------|--------|--------|--------|--------|
| 0.0048 | 0.0024 | SFRP1_P157_F         | 0.0058 | 0.0070 | 0.0000 | 0.0031 | 0.0068 | 0.0039 |
| 0.9717 | 0.0000 | SFTPA1_E340_R        | 0.9821 | 0.9859 | 0.9753 | 0.0000 | 0.0000 | 0.9785 |
| 0.0013 | 0.0053 | SH3BP2_P771_R        | 0.0031 | 0.2606 | 0.1408 | 0.0000 | 0.0000 | 0.0066 |
| 0.0028 | 0.0000 | SHB_P473_R           | 0.0018 | 0.0048 | 0.0000 | 0.0050 | 0.2542 | 0.0015 |
| 0.0206 | 0.0087 | SHB_P691_R           | 0.0114 | 0.0136 | 0.0058 | 0.2406 | 0.0042 | 0.0144 |
| 0.0000 | 0.0000 | SHH_E328_F           | 0.0000 | 0.4757 | 0.2238 | 0.0000 | 0.0000 | 0.0000 |
| 0.6312 | 0.0075 | SHH_P104_R           | 0.0057 | 0.0123 | 0.0916 | 0.0091 | 0.0108 | 0.0089 |
| 0.9543 | 0.0000 | SIN3B_P514_R         | 0.9769 | 0.9825 | 0.9749 | 0.0000 | 0.0000 | 0.9698 |
| 0.0077 | 0.0045 | SKI_E465_R           | 0.0096 | 0.0097 | 0.0000 | 0.0090 | 0.0000 | 0.0070 |
| 0.9864 | 0.7514 | SLC22A2_E271_R       | 0.9764 | 0.9827 | 0.9809 | 0.9886 | 0.9929 | 0.9848 |
| 0.0167 | 0.6092 | SLC22A3_P634_F       | 0.6323 | 0.0176 | 0.5043 | 0.0036 | 0.3817 | 0.4859 |
| 0.7740 | 0.0000 | SLC6A8_seq_28_S227_F | 0.0000 | 0.0000 | 0.6648 | 0.0000 | 0.0000 | 0.0000 |
| 0.0073 | 0.3540 | SLIT2_P208_F         | 0.0079 | 0.0110 | 0.0477 | 0.0099 | 0.1583 | 0.0055 |
| 0.0000 | 0.0000 | SMAD2_P708_R         | 0.0065 | 0.0053 | 0.0000 | 0.0000 | 0.0025 | 0.0051 |
| 0.0189 | 0.4836 | SMAD2_P848_R         | 0.0048 | 0.0034 | 0.1301 | 0.0000 | 0.0008 | 0.4221 |
| 0.0016 | 0.0000 | SMAD4_P474_R         | 0.0000 | 0.0000 | 0.0000 | 0.0000 | 0.1103 | 0.0000 |
| 0.0042 | 0.0038 | SMARCA3_E20_F        | 0.0021 | 0.0290 | 0.0109 | 0.0017 | 0.0033 | 0.0027 |
| 0.0173 | 0.0000 | SMARCA3_P109_R       | 0.0172 | 0.0201 | 0.0744 | 0.0077 | 0.0067 | 0.1949 |
| 0.0109 | 0.0000 | SMARCA3_P17_R        | 0.0040 | 0.3545 | 0.3718 | 0.0000 | 0.0122 | 0.3262 |
| 0.0054 | 0.0071 | SMARCA4_P362_R       | 0.0048 | 0.0107 | 0.0008 | 0.0053 | 0.0033 | 0.0065 |
| 0.0009 | 0.0000 | SMO_E57_F            | 0.0069 | 0.0138 | 0.0539 | 0.0021 | 0.0000 | 0.0080 |
| 0.0118 | 0.2910 | SOD3_P225_F          | 0.9440 | 0.9694 | 0.9620 | 0.9908 | 0.0000 | 0.9697 |
| 0.0055 | 0.0000 | SOX1_P1018_R         | 0.0013 | 0.0054 | 0.0000 | 0.0000 | 0.1106 | 0.0009 |
| 0.0151 | 0.0092 | SOX1_P294_F          | 0.0148 | 0.0149 | 0.0912 | 0.5684 | 0.4662 | 0.0130 |
| 0.0000 | 0.0000 | SOX17_P287_R         | 0.0000 | 0.5560 | 0.0071 | 0.0000 | 0.0000 | 0.1813 |
| 0.0808 | 0.7184 | SOX17_P303_F         | 0.0938 | 0.0802 | 0.0736 | 0.1243 | 0.2979 | 0.0955 |
| 0.0089 | 0.0000 | SOX2_P546_F          | 0.0086 | 0.2391 | 0.0028 | 0.0059 | 0.0575 | 0.0097 |
| 0.0109 | 0.0846 | SPARC_E50_R          | 0.1423 | 0.1408 | 0.1092 | 0.0055 | 0.0034 | 0.2261 |
| 0.0048 | 0.0017 | SPARC_P195_F         | 0.0672 | 0.0068 | 0.0668 | 0.0064 | 0.0035 | 0.0054 |
| 0.3304 | 0.1790 | SPDEF_E116_R         | 0.0240 | 0.0552 | 0.5977 | 0.1563 | 0.6074 | 0.9426 |
| 0.0179 | 0.9908 | SPI1_E205_F          | 0.6634 | 0.2675 | 0.2652 | 0.0174 | 0.5017 | 0.0240 |
| 0.0047 | 0.0040 | SPP1_E140_R          | 0.1587 | 0.1118 | 0.1064 | 0.0000 | 0.0089 | 0.0055 |
| 0.9825 | 0.9943 | SRC_P297_F           | 0.9828 | 0.9787 | 0.9804 | 0.2786 | 0.9929 | 0.9812 |



|        |        |                |        |        |        |        |        |        |
|--------|--------|----------------|--------|--------|--------|--------|--------|--------|
| 0.0745 | 0.0000 | ST6GAL1_P164_R | 0.0115 | 0.0718 | 0.0000 | 0.0281 | 0.0000 | 0.0258 |
| 0.0053 | 0.0054 | ST6GAL1_P528_F | 0.0031 | 0.0069 | 0.0375 | 0.0034 | 0.0000 | 0.0041 |
| 0.9092 | 0.0042 | STK23_E182_R   | 0.9792 | 0.2693 | 0.9820 | 0.7812 | 0.9924 | 0.2951 |
| 0.0144 | 0.1365 | SYK_E372_F     | 0.0121 | 0.0089 | 0.0319 | 0.0117 | 0.0717 | 0.0182 |
| 0.0089 | 0.5180 | TAL1_E122_F    | 0.0054 | 0.0094 | 0.0000 | 0.4529 | 0.2831 | 0.0120 |
| 0.0012 | 0.0068 | TAL1_P594_F    | 0.0000 | 0.0017 | 0.1112 | 0.0000 | 0.0000 | 0.0000 |
| 0.0000 | 0.0000 | TAL1_P817_F    | 0.9084 | 0.7449 | 0.0000 | 0.0000 | 0.0000 | 0.9083 |
| 0.0000 | 0.0000 | TCF4_P175_R    | 0.0000 | 0.0000 | 0.2406 | 0.0000 | 0.0000 | 0.0000 |
| 0.0059 | 0.0000 | TCF7L2_E411_F  | 0.0013 | 0.0043 | 0.0000 | 0.0014 | 0.0014 | 0.0000 |
| 0.0368 | 0.0000 | TCF7L2_P193_R  | 0.0035 | 0.0047 | 0.0000 | 0.0011 | 0.0000 | 0.0021 |
| 0.0104 | 0.0066 | TERT_E20_F     | 0.0114 | 0.0139 | 0.0322 | 0.0066 | 0.0062 | 0.0128 |
| 0.4223 | 0.0137 | TERT_P360_R    | 0.3138 | 0.3630 | 0.1623 | 0.0157 | 0.1279 | 0.0200 |
| 0.0000 | 0.0000 | TES_E172_F     | 0.0009 | 0.0031 | 0.4270 | 0.0000 | 0.0036 | 0.8092 |
| 0.0049 | 0.0170 | TESK2_P252_R   | 0.0058 | 0.0100 | 0.0015 | 0.9789 | 0.2889 | 0.0408 |
| 0.0000 | 0.0029 | TFAP2C_E260_F  | 0.0000 | 0.1355 | 0.0000 | 0.0000 | 0.0000 | 0.0000 |
| 0.0079 | 0.0034 | TFAP2C_P765_F  | 0.0065 | 0.0095 | 0.0383 | 0.0000 | 0.0037 | 0.0117 |
| 0.9852 | 0.8276 | TFF2_P178_F    | 0.9596 | 0.7853 | 0.9770 | 0.9785 | 0.9945 | 0.9814 |
| 0.8819 | 0.0762 | TFF2_P557_R    | 0.9691 | 0.9863 | 0.9857 | 0.9891 | 0.9942 | 0.9851 |
| 0.0000 | 0.0000 | TFPI2_E141_F   | 0.0000 | 0.0018 | 0.0000 | 0.0000 | 0.0000 | 0.0000 |
| 0.0146 | 0.0615 | TFPI2_P152_R   | 0.0127 | 0.0313 | 0.0384 | 0.0086 | 0.2265 | 0.0366 |
| 0.0099 | 0.5209 | TFPI2_P9_F     | 0.0139 | 0.0165 | 0.0057 | 0.0226 | 0.3022 | 0.0165 |
| 0.0010 | 0.0016 | TFRC_P414_R    | 0.0131 | 0.0140 | 0.0000 | 0.0000 | 0.1310 | 0.0110 |
| 0.8520 | 0.5195 | TGFA_P558_F    | 0.0077 | 0.0110 | 0.0021 | 0.0971 | 0.0000 | 0.0093 |
| 0.0040 | 0.0000 | TGFA_P642_R    | 0.0029 | 0.0128 | 0.0000 | 0.0896 | 0.0011 | 0.0052 |
| 0.9886 | 0.0000 | TGFB1_P833_R   | 0.8855 | 0.9763 | 0.9795 | 0.0000 | 0.0000 | 0.8139 |
| 0.0000 | 0.0000 | TGFB2_E226_R   | 0.0001 | 0.0050 | 0.0000 | 0.0000 | 0.0000 | 0.0000 |
| 0.0117 | 0.0068 | TGFB2_P632_F   | 0.0150 | 0.0160 | 0.0385 | 0.0093 | 0.0062 | 0.0133 |
| 0.3694 | 0.9926 | TGFB3_E58_R    | 0.4138 | 0.9851 | 0.9851 | 0.9902 | 0.9924 | 0.9852 |
| 0.0146 | 0.1285 | TGFBI_P173_F   | 0.0132 | 0.0189 | 0.2103 | 0.0130 | 0.0711 | 0.2712 |
| 0.0066 | 0.8131 | TGFBI_P31_R    | 0.0070 | 0.0789 | 0.0798 | 0.0051 | 0.0486 | 0.1247 |
| 0.3007 | 0.0031 | TGFBR3_E188_R  | 0.0031 | 0.0030 | 0.0000 | 0.0013 | 0.0056 | 0.0019 |
| 0.0016 | 0.0000 | TGFBR3_P429_F  | 0.0000 | 0.0032 | 0.0000 | 0.0000 | 0.0000 | 0.0000 |
| 0.0021 | 0.0000 | THBS1_E207_R   | 0.0032 | 0.0043 | 0.0000 | 0.0000 | 0.0000 | 0.0033 |

|        |        |                   |        |        |        |        |        |        |
|--------|--------|-------------------|--------|--------|--------|--------|--------|--------|
| 0.0175 | 0.0000 | THBS1_P500_F      | 0.1168 | 0.1512 | 0.0350 | 0.0045 | 0.0051 | 0.0215 |
| 0.0058 | 0.0185 | THBS2_E129_F      | 0.0033 | 0.0032 | 0.0000 | 0.0000 | 0.0019 | 0.0022 |
| 0.0216 | 0.0356 | THY1_P149_R       | 0.0280 | 0.0387 | 0.0641 | 0.0138 | 0.5761 | 0.0293 |
| 0.0010 | 0.0000 | TIAM1_P188_R      | 0.0000 | 0.0032 | 0.0156 | 0.0020 | 0.0000 | 0.0000 |
| 0.2306 | 0.0514 | TIMP1_E254_R      | 0.0604 | 0.4389 | 0.3434 | 0.0504 | 0.0216 | 0.0284 |
| 0.9728 | 0.9892 | TIMP1_P615_R      | 0.9398 | 0.6805 | 0.9675 | 0.9828 | 0.0000 | 0.9443 |
| 0.0063 | 0.0128 | TIMP2_E394_R      | 0.0059 | 0.0083 | 0.0114 | 0.0000 | 0.0000 | 0.0072 |
| 0.0026 | 0.0000 | TIMP2_P267_F      | 0.0010 | 0.0000 | 0.0232 | 0.0053 | 0.0029 | 0.0011 |
| 0.9899 | 0.2528 | TIMP3_P1114_R     | 0.9805 | 0.9875 | 0.9856 | 0.9935 | 0.9917 | 0.9863 |
| 0.9883 | 0.9935 | TIMP3_P690_R      | 0.9889 | 0.9881 | 0.9878 | 0.0000 | 0.9945 | 0.9872 |
| 0.4361 | 0.0031 | TIMP3_seq_7_S38_F | 0.0090 | 0.0098 | 0.0013 | 0.0566 | 0.0001 | 0.7899 |
| 0.0122 | 0.0272 | TJP1_P326_R       | 0.0068 | 0.0138 | 0.0060 | 0.0105 | 0.0086 | 0.0135 |
| 0.0072 | 0.0060 | TJP1_P390_F       | 0.0043 | 0.0080 | 0.0000 | 0.0046 | 0.0000 | 0.0062 |
| 0.0862 | 0.3824 | TK1_E47_F         | 0.1382 | 0.0238 | 0.4083 | 0.0000 | 0.0046 | 0.0317 |
| 0.0057 | 0.0016 | TK1_P62_R         | 0.0086 | 0.0076 | 0.0269 | 0.0092 | 0.4099 | 0.0074 |
| 0.0091 | 0.0000 | TMEFF1_E180_R     | 0.0003 | 0.0084 | 0.0000 | 0.0000 | 0.0000 | 0.0068 |
| 0.2673 | 0.0000 | TMEFF1_P234_F     | 0.0000 | 0.0038 | 0.0409 | 0.0000 | 0.0000 | 0.0005 |
| 0.0541 | 0.0311 | TMEFF2_P152_R     | 0.0865 | 0.0630 | 0.1616 | 0.2966 | 0.0237 | 0.3919 |
| 0.0000 | 0.0000 | TMEFF2_P210_R     | 0.0093 | 0.0000 | 0.2289 | 0.0000 | 0.0000 | 0.0000 |
| 0.0000 | 0.0000 | TMEM63A_E63_F     | 0.0000 | 0.0000 | 0.0000 | 0.0000 | 0.0000 | 0.0000 |
| 0.9829 | 0.9933 | TMPRSS4_E83_F     | 0.9778 | 0.9882 | 0.9837 | 0.0483 | 0.9925 | 0.9855 |
| 0.7266 | 0.0549 | TMPRSS4_P552_F    | 0.8069 | 0.9762 | 0.8390 | 0.0273 | 0.4753 | 0.8968 |
| 0.0001 | 0.0000 | TNC_P198_F        | 0.0004 | 0.3998 | 0.3396 | 0.5693 | 0.0000 | 0.0000 |
| 0.0073 | 0.0115 | TNC_P57_F         | 0.0039 | 0.0068 | 0.0315 | 0.0103 | 0.0084 | 0.2856 |
| 0.9888 | 0.9962 | TNF_P1084_F       | 0.9859 | 0.9889 | 0.9863 | 0.9939 | 0.0089 | 0.9813 |
| 0.0000 | 0.0000 | TNF_P158_F        | 0.1320 | 0.0035 | 0.0000 | 0.0000 | 0.0000 | 0.0000 |
| 0.0062 | 0.0052 | TNFRSF10A_P171_F  | 0.0064 | 0.0112 | 0.0024 | 0.0075 | 0.0085 | 0.0101 |
| 0.0042 | 0.0020 | TNFRSF10A_P91_F   | 0.0007 | 0.0029 | 0.0000 | 0.0000 | 0.0100 | 0.0041 |
| 0.0253 | 0.0115 | TNFRSF10B_P108_R  | 0.0282 | 0.0264 | 0.0209 | 0.0172 | 0.0076 | 0.0462 |
| 0.0045 | 0.1018 | TNFRSF10C_E109_F  | 0.0032 | 0.0040 | 0.0000 | 0.0040 | 0.0033 | 0.0042 |
| 0.0109 | 0.0094 | TNFRSF10D_E27_F   | 0.0079 | 0.0088 | 0.0459 | 0.0037 | 0.0044 | 0.0088 |
| 0.0218 | 0.1659 | TNFRSF10D_P70_F   | 0.0216 | 0.0205 | 0.1003 | 0.1110 | 0.0396 | 0.0190 |
| 0.2409 | 0.0000 | TNFRSF1B_E5_F     | 0.3428 | 0.2543 | 0.0462 | 0.0000 | 0.0000 | 0.0141 |

|        |                          |        |        |        |        |        |        |
|--------|--------------------------|--------|--------|--------|--------|--------|--------|
| 0.0000 | 0.0002 TNFRSF1B_P167_F   | 0.0025 | 0.0038 | 0.0458 | 0.0030 | 0.0000 | 0.0005 |
| 0.0066 | 0.0000 TNFSF10_E53_F     | 0.0096 | 0.2061 | 0.0004 | 0.3884 | 0.0000 | 0.0102 |
| 0.0000 | 0.0000 TNFSF10_P2_R      | 0.0039 | 0.0000 | 0.0000 | 0.9907 | 0.0020 | 0.0000 |
| 0.4002 | 0.0072 TNFSF8_E258_R     | 0.3527 | 0.0064 | 0.0274 | 0.0131 | 0.0000 | 0.0037 |
| 0.0058 | 0.0015 TNFSF8_P184_F     | 0.0043 | 0.0054 | 0.0000 | 0.0051 | 0.0023 | 0.0034 |
| 0.0163 | 0.0081 TNK1_P41_R        | 0.0144 | 0.2252 | 0.1062 | 0.0071 | 0.1259 | 0.0166 |
| 0.0084 | 0.6760 TP73_E155_F       | 0.0156 | 0.0138 | 0.0420 | 0.0095 | 0.0067 | 0.0134 |
| 0.0056 | 0.0043 TP73_P496_F       | 0.0057 | 0.0050 | 0.1451 | 0.0000 | 0.0033 | 0.0043 |
| 0.0113 | 0.0219 TP73_P945_F       | 0.3140 | 0.0901 | 0.0846 | 0.0000 | 0.0049 | 0.0075 |
| 0.0066 | 0.0000 TPEF_seq_44_S36_F | 0.0067 | 0.0074 | 0.0000 | 0.0089 | 0.0000 | 0.0072 |
| 0.0130 | 0.0553 TPEF_seq_44_S88_R | 0.0122 | 0.0126 | 0.0283 | 0.0066 | 0.0045 | 0.0111 |
| 0.9801 | 0.9910 TRIM29_P261_F     | 0.9757 | 0.9732 | 0.9812 | 0.7549 | 0.9919 | 0.9791 |
| 0.1124 | 0.0067 TRIP6_E33_F       | 0.0080 | 0.0706 | 0.0431 | 0.0043 | 0.0048 | 0.0157 |
| 0.0014 | 0.0000 TSG101_P257_R     | 0.8511 | 0.2026 | 0.3505 | 0.0038 | 0.0000 | 0.0000 |
| 0.0412 | 0.0656 TUBB3_E91_F       | 0.0037 | 0.0357 | 0.2951 | 0.0000 | 0.0000 | 0.3204 |
| 0.0000 | 0.0000 TUBB3_P364_F      | 0.0000 | 0.0000 | 0.0000 | 0.0000 | 0.0022 | 0.0000 |
| 0.0000 | 0.0000 TUBB3_P721_R      | 0.0000 | 0.0054 | 0.0820 | 0.0000 | 0.0012 | 0.0000 |
| 0.0054 | 0.0402 TUSC3_E29_R       | 0.0060 | 0.0107 | 0.0000 | 0.0032 | 0.0048 | 0.3027 |
| 0.3390 | 0.0092 TUSC3_P85_R       | 0.1586 | 0.1066 | 0.0656 | 0.0056 | 0.0119 | 0.4990 |
| 0.0000 | 0.0369 TWIST1_E117_R     | 0.0000 | 0.0000 | 0.0000 | 0.0000 | 0.0000 | 0.0000 |
| 0.0027 | 0.0000 TWIST1_P355_R     | 0.0273 | 0.0075 | 0.1221 | 0.0316 | 0.0034 | 0.0004 |
| 0.0000 | 0.0000 TWIST1_P44_R      | 0.0000 | 0.0000 | 0.0228 | 0.0000 | 0.0000 | 0.0000 |
| 0.0043 | 0.0005 TYRO3_P501_F      | 0.0016 | 0.0040 | 0.0000 | 0.0000 | 0.0000 | 0.0000 |
| 0.0000 | 0.0000 UBA52_P293_R      | 0.0000 | 0.0000 | 0.0000 | 0.0000 | 0.0000 | 0.0000 |
| 0.9893 | 0.9948 UGT1A1_E11_F      | 0.9853 | 0.9848 | 0.9852 | 0.7295 | 0.0000 | 0.9869 |
| 0.8835 | 0.8951 UGT1A1_P564_R     | 0.9075 | 0.9132 | 0.9185 | 0.9461 | 0.5691 | 0.9170 |
| 0.9828 | 0.9949 UGT1A7_P751_R     | 0.9887 | 0.9868 | 0.9836 | 0.9880 | 0.9904 | 0.9862 |
| 0.0055 | 0.0000 UNG_P170_F        | 0.2903 | 0.0037 | 0.0824 | 0.0065 | 0.0076 | 0.0016 |
| 0.9782 | 0.9907 USP29_E274_F      | 0.9883 | 0.9889 | 0.9856 | 0.9886 | 0.0000 | 0.9858 |
| 0.9848 | 0.0000 USP29_P282_R      | 0.9810 | 0.9793 | 0.9750 | 0.9606 | 0.0000 | 0.9740 |
| 0.0166 | 0.0061 VAMP8_P114_F      | 0.0110 | 0.0144 | 0.0280 | 0.0104 | 0.0055 | 0.0115 |
| 0.0131 | 0.0032 VAV1_E9_F         | 0.0109 | 0.0091 | 0.0054 | 0.0044 | 0.0000 | 0.0138 |
| 0.0003 | 0.0000 VAV1_P317_F       | 0.0000 | 0.0053 | 0.0897 | 0.0039 | 0.0020 | 0.0000 |

|        |        |                |        |        |        |        |        |        |
|--------|--------|----------------|--------|--------|--------|--------|--------|--------|
| 0.5273 | 0.0172 | VAV2_E58_F     | 0.0349 | 0.0269 | 0.0171 | 0.0363 | 0.2650 | 0.0270 |
| 0.0000 | 0.0000 | VAV2_P1182_F   | 0.4403 | 0.3487 | 0.0000 | 0.0000 | 0.0000 | 0.0045 |
| 0.3330 | 0.0000 | VBP1_P12_R     | 0.4262 | 0.0000 | 0.5652 | 0.6462 | 0.0214 | 0.0000 |
| 0.0073 | 0.0105 | VEGFB_P658_F   | 0.0041 | 0.0074 | 0.0230 | 0.0206 | 0.0041 | 0.0095 |
| 0.0000 | 0.0000 | VIM_P811_R     | 0.0000 | 0.0000 | 0.0000 | 0.0000 | 0.0000 | 0.0000 |
| 0.7092 | 0.0000 | WEE1_P924_R    | 0.9339 | 0.9867 | 0.9861 | 0.9770 | 0.4940 | 0.9840 |
| 0.0000 | 0.0000 | WNT2_E109_R    | 0.0000 | 0.0000 | 0.0000 | 0.0000 | 0.0000 | 0.0000 |
| 0.0360 | 0.2316 | WNT2_P217_F    | 0.0330 | 0.0399 | 0.0359 | 0.2253 | 0.0142 | 0.0376 |
| 0.0161 | 0.0161 | WNT2B_P1185_R  | 0.0157 | 0.0154 | 0.0951 | 0.0110 | 0.2084 | 0.0168 |
| 0.0132 | 0.0118 | WNT5A_E43_F    | 0.1613 | 0.0146 | 0.0587 | 0.6934 | 0.0101 | 0.0140 |
| 0.0041 | 0.0000 | WNT5A_P655_F   | 0.0047 | 0.0076 | 0.0000 | 0.0064 | 0.0000 | 0.0000 |
| 0.9413 | 0.9915 | WNT8B_E487_F   | 0.9649 | 0.9610 | 0.9650 | 0.0065 | 0.5938 | 0.9773 |
| 0.9750 | 0.0000 | WNT8B_P216_R   | 0.9744 | 0.9775 | 0.9752 | 0.9886 | 0.0062 | 0.9766 |
| 0.0257 | 0.3319 | WRN_E57_F      | 0.5328 | 0.0406 | 0.1140 | 0.3406 | 0.6820 | 0.0437 |
| 0.9799 | 0.0437 | WRN_P969_F     | 0.9832 | 0.9492 | 0.9827 | 0.0000 | 0.0000 | 0.9727 |
| 0.0108 | 0.0000 | WT1_E32_F      | 0.0073 | 0.0035 | 0.0000 | 0.5427 | 0.0000 | 0.0036 |
| 0.0058 | 0.0030 | WT1_P853_F     | 0.0055 | 0.0042 | 0.0000 | 0.0081 | 0.0018 | 0.0020 |
| 0.9798 | 0.0000 | XRCC1_P681_R   | 0.9789 | 0.9684 | 0.9801 | 0.0000 | 0.9911 | 0.9779 |
| 0.9916 | 0.1184 | XRCC2_P1077_F  | 0.9879 | 0.9843 | 0.9855 | 0.9919 | 0.9945 | 0.9852 |
| 0.2287 | 0.1114 | YES1_P600_F    | 0.0151 | 0.0154 | 0.0098 | 0.3193 | 0.0000 | 0.0129 |
| 0.9902 | 0.0847 | ZIM3_E203_F    | 0.9860 | 0.9883 | 0.9817 | 0.9907 | 0.9931 | 0.9852 |
| 0.9870 | 0.1748 | ZIM3_P451_R    | 0.9888 | 0.9882 | 0.9857 | 0.9886 | 0.9936 | 0.9842 |
| 0.9817 | 0.0000 | ZIM3_P718_R    | 0.9826 | 0.9878 | 0.9782 | 0.9940 | 0.9625 | 0.9883 |
| 0.0000 | 0.0000 | ZMYND10_E77_R  | 0.0000 | 0.0021 | 0.0000 | 0.0000 | 0.0000 | 0.0010 |
| 0.0173 | 0.0042 | ZNF215_P71_R   | 0.0104 | 0.3858 | 0.1692 | 0.0081 | 0.0000 | 0.0056 |
| 0.0000 | 0.0000 | ZNF264_E48_R   | 0.0000 | 0.0000 | 0.0000 | 0.0000 | 0.0000 | 0.0000 |
| 0.9030 | 0.9924 | ZNFN1A1_E102_F | 0.8875 | 0.8967 | 0.9751 | 0.6758 | 0.0000 | 0.9253 |
| 0.9822 | 0.0000 | ZNFN1A1_P179_F | 0.9823 | 0.9824 | 0.9804 | 0.9898 | 0.3349 | 0.9845 |
